# Supplementary material for: Evolution of cation binding in the active sites of P-loop nucleoside triphosphatases in relation to the basic catalytic mechanism
Source: eLife journal article supplement (doi:10.7554/elife.37373), 2018-12-11
Supplement: supp [file elife-37373-supp-v1.zip]

Archive with 22 entries (22 files):
- elife_poa_e37373_Figure_6_figure_supplement_2.png
- elife_poa_e37373_Transparent_Reporting_File.pdf
- elife_poa_e37373_Figure_2_figure_supplement_1.png
- elife_poa_e37373_Figure_6_figure_supplement_4.png
- elife_poa_e37373_Figure_7_figure_supplement_2.png
- elife_poa_e37373_Figure_2_source_data_2.txt
- elife_poa_e37373_Figure_5_figure_supplement_2.png
- elife_poa_e37373_Figures_2_source_data_1.txt
- elife_poa_e37373_Figure_2_figure_supplement_3.png
- elife_poa_e37373_Figure_4_Figure_Supplement_3.tif
- elife_poa_e37373_Figure_7_figure_supplement_1.png
- elife_poa_e37373_Figure_2_figure_supplement_2.png
- elife_poa_e37373_Figure_4_figure_supplement_2.tif
- elife_poa_e37373_Figure_3_figure_supplement_1.png
- elife_poa_e37373_Figure_4_figure_supplement_1.png
- elife_poa_e37373_Figure_7_source_data_1.zip
- elife_poa_e37373_Supplementary_File_1.docx
- elife_poa_e37373_Figure_7_source_data_2.txt
- elife_poa_e37373_Figure_6_figure_supplement_3.png
- elife_poa_e37373_Figure_6_figure_supplement_1.png
- elife_poa_e37373_Figure_2_source_data_3.txt
- elife_poa_e37373_Figure_5_figure_supplement_1.png
