# Supplementary material for: Evolution of cation binding in the active sites of P-loop nucleoside triphosphatases in relation to the basic catalytic mechanism
Source: eLife journal article supplement (doi:10.7554/elife.37373), 2018-12-11
Supplement: supp [file elife-37373-supp-v1.zip › elife_poa_e37373_Figure_2_source_data_2.txt]

CRYST1   29.976   29.976   39.967  90.00  90.00  90.00 P 1           1
ATOM      1  C4' ATP X   1      14.034   0.374   5.943  0.00  0.00            
ATOM      2  H4' ATP X   1      15.071   0.041   6.103  0.00  0.00            
ATOM      3  O4' ATP X   1      13.401   0.312   7.218  0.00  0.00            
ATOM      4  C1' ATP X   1      12.532  -0.879   7.295  0.00  0.00            
ATOM      5  H1' ATP X   1      12.824  -1.608   8.065  0.00  0.00            
ATOM      6  C5  ATP X   1       9.101  -0.290   8.066  0.00  0.00            
ATOM      7  N7  ATP X   1       9.263   0.796   7.242  0.00  0.00            
ATOM      8  C8  ATP X   1      10.586   0.724   6.896  0.00  0.00            
ATOM      9  H8  ATP X   1      11.228   1.493   6.468  0.00  0.00            
ATOM     10  N9  ATP X   1      11.170  -0.428   7.397  0.00  0.00            
ATOM     11  N1  ATP X   1       8.146  -1.727   9.659  0.00  0.00            
ATOM     12  C2  ATP X   1       9.304  -2.521   9.643  0.00  0.00            
ATOM     13  H2  ATP X   1       9.292  -3.407  10.279  0.00  0.00            
ATOM     14  N3  ATP X   1      10.394  -2.172   8.949  0.00  0.00            
ATOM     15  C4  ATP X   1      10.240  -1.092   8.204  0.00  0.00            
ATOM     16  C6  ATP X   1       7.993  -0.647   8.889  0.00  0.00            
ATOM     17  N6  ATP X   1       6.809  -0.042   8.885  0.00  0.00            
ATOM     18  H61 ATP X   1       6.324   0.182   8.040  0.00  0.00            
ATOM     19  H62 ATP X   1       6.152   0.109   9.624  0.00  0.00            
ATOM     20  C2' ATP X   1      12.907  -1.679   6.017  0.00  0.00            
ATOM     21  H2' ATP X   1      12.079  -2.339   5.719  0.00  0.00            
ATOM     22  O2' ATP X   1      14.015  -2.532   6.178  0.00  0.00            
ATOM     23  H2T ATP X   1      14.099  -3.020   5.355  0.00  0.00            
ATOM     24  C3' ATP X   1      13.188  -0.537   5.043  0.00  0.00            
ATOM     25  H3' ATP X   1      12.246  -0.074   4.715  0.00  0.00            
ATOM     26  O3' ATP X   1      14.060  -0.929   3.884  0.00  0.00            
ATOM     27  H3T ATP X   1      14.934  -1.163   4.204  0.00  0.00            
ATOM     28  C5' ATP X   1      13.965   1.844   5.422  0.00  0.00            
ATOM     29  H51 ATP X   1      14.598   2.042   4.531  0.00  0.00            
ATOM     30  H52 ATP X   1      14.374   2.494   6.224  0.00  0.00            
ATOM     31  O5' ATP X   1      12.587   2.237   5.145  0.00  0.00            
ATOM     32  PA  ATP X   1      12.045   3.794   5.288  0.00  0.00            
ATOM     33  O1A ATP X   1      10.768   3.669   4.468  0.00  0.00            
ATOM     34  O2A ATP X   1      11.841   4.098   6.799  0.00  0.00            
ATOM     35  O3A ATP X   1      13.180   4.651   4.507  0.00  0.00            
ATOM     36  PB  ATP X   1      13.320   6.244   4.365  0.00  0.00            
ATOM     37  O1B ATP X   1      13.303   6.862   5.743  0.00  0.00            
ATOM     38  O2B ATP X   1      14.344   6.552   3.285  0.00  0.00            
ATOM     39  O3B ATP X   1      11.866   6.464   3.731  0.00  0.00            
ATOM     40  PG  ATP X   1      11.049   7.824   3.661  0.00  0.00            
ATOM     41  O1G ATP X   1      11.979   8.674   2.869  0.00  0.00            
ATOM     42  O2G ATP X   1      10.883   8.256   5.099  0.00  0.00            
ATOM     43  O3G ATP X   1       9.871   7.384   2.886  0.00  0.00            
ATOM     44  Mg  MG  X   2      12.017   8.207   6.680  0.00  0.00            
ATOM     45  NA  NA  X1196      13.234   7.612   1.487  0.00  0.00            
ATOM     46  NA  NA  X1197       1.197  27.534  22.934  0.00  0.00            
ATOM     47  NA  NA  X1198      15.155  25.661  30.411  0.00  0.00            
ATOM     48  NA  NA  X1199      10.231   5.232   2.867  0.00  0.00            
ATOM     49  NA  NA  X1200      28.072   9.174  39.477  0.00  0.00            
ATOM     50  NA  NA  X1201       2.799  19.728  12.351  0.00  0.00            
ATOM     51  CL  CL  X1202      23.703   9.176  38.722  0.00  0.00            
ATOM     52  CL  CL  X1203      14.876  23.723  28.532  0.00  0.00            
ATOM     53  CL  CL  X1204      20.729  17.776  10.487  0.00  0.00            
ATOM     54  CL  CL  X1205      23.975  26.897  33.370  0.00  0.00            
ATOM     55  OW  HOH X   3      13.493  26.563  29.022  0.00  0.00            
ATOM     56  HW1 HOH X   3      13.448  25.862  28.372  0.00  0.00            
ATOM     57  HW2 HOH X   3      12.613  26.938  29.033  0.00  0.00            
ATOM     58  OW  HOH X   4       7.481   0.705  36.581  0.00  0.00            
ATOM     59  HW1 HOH X   4       6.741   1.244  36.305  0.00  0.00            
ATOM     60  HW2 HOH X   4       7.617   0.095  35.856  0.00  0.00            
ATOM     61  OW  HOH X   5      24.670  14.864  20.561  0.00  0.00            
ATOM     62  HW1 HOH X   5      25.059  15.515  21.145  0.00  0.00            
ATOM     63  HW2 HOH X   5      25.106  15.005  19.721  0.00  0.00            
ATOM     64  OW  HOH X   6      22.627  16.918  16.730  0.00  0.00            
ATOM     65  HW1 HOH X   6      22.258  17.392  15.984  0.00  0.00            
ATOM     66  HW2 HOH X   6      23.094  17.587  17.231  0.00  0.00            
ATOM     67  OW  HOH X   7      20.046   9.001   8.704  0.00  0.00            
ATOM     68  HW1 HOH X   7      20.097   9.957   8.688  0.00  0.00            
ATOM     69  HW2 HOH X   7      20.845   8.726   9.155  0.00  0.00            
ATOM     70  OW  HOH X   8       0.427  15.395  12.682  0.00  0.00            
ATOM     71  HW1 HOH X   8       0.536  15.971  13.438  0.00  0.00            
ATOM     72  HW2 HOH X   8      -0.158  14.703  12.990  0.00  0.00            
ATOM     73  OW  HOH X   9       3.427  29.227  22.864  0.00  0.00            
ATOM     74  HW1 HOH X   9       3.716  30.092  22.574  0.00  0.00            
ATOM     75  HW2 HOH X   9       3.662  28.642  22.143  0.00  0.00            
ATOM     76  OW  HOH X  10       1.777  17.792   2.782  0.00  0.00            
ATOM     77  HW1 HOH X  10       1.319  17.704   3.618  0.00  0.00            
ATOM     78  HW2 HOH X  10       2.396  17.062   2.770  0.00  0.00            
ATOM     79  OW  HOH X  11      15.085   1.668  29.126  0.00  0.00            
ATOM     80  HW1 HOH X  11      15.345   1.707  30.046  0.00  0.00            
ATOM     81  HW2 HOH X  11      15.072   0.734  28.920  0.00  0.00            
ATOM     82  OW  HOH X  12       7.293   7.344   3.439  0.00  0.00            
ATOM     83  HW1 HOH X  12       8.193   7.457   3.132  0.00  0.00            
ATOM     84  HW2 HOH X  12       7.327   6.569   4.000  0.00  0.00            
ATOM     85  OW  HOH X  13      14.362  29.479  36.441  0.00  0.00            
ATOM     86  HW1 HOH X  13      14.401  28.696  35.893  0.00  0.00            
ATOM     87  HW2 HOH X  13      13.626  29.322  37.032  0.00  0.00            
ATOM     88  OW  HOH X  14       3.321  14.389  14.779  0.00  0.00            
ATOM     89  HW1 HOH X  14       3.395  13.622  15.346  0.00  0.00            
ATOM     90  HW2 HOH X  14       3.392  15.135  15.373  0.00  0.00            
ATOM     91  OW  HOH X  15      22.128   9.336  11.934  0.00  0.00            
ATOM     92  HW1 HOH X  15      22.496  10.096  11.484  0.00  0.00            
ATOM     93  HW2 HOH X  15      22.262   9.519  12.864  0.00  0.00            
ATOM     94  OW  HOH X  16      21.549   6.189   1.716  0.00  0.00            
ATOM     95  HW1 HOH X  16      21.631   5.262   1.489  0.00  0.00            
ATOM     96  HW2 HOH X  16      20.742   6.240   2.227  0.00  0.00            
ATOM     97  OW  HOH X  17      23.465   2.168   9.916  0.00  0.00            
ATOM     98  HW1 HOH X  17      24.347   2.089   9.552  0.00  0.00            
ATOM     99  HW2 HOH X  17      22.990   2.703   9.280  0.00  0.00            
ATOM    100  OW  HOH X  18      24.965   9.444  30.009  0.00  0.00            
ATOM    101  HW1 HOH X  18      24.346  10.157  29.857  0.00  0.00            
ATOM    102  HW2 HOH X  18      25.467   9.384  29.196  0.00  0.00            
ATOM    103  OW  HOH X  19      13.094  17.928  33.770  0.00  0.00            
ATOM    104  HW1 HOH X  19      13.949  17.892  33.341  0.00  0.00            
ATOM    105  HW2 HOH X  19      12.471  18.053  33.054  0.00  0.00            
ATOM    106  OW  HOH X  20      25.521   2.440  34.400  0.00  0.00            
ATOM    107  HW1 HOH X  20      24.980   3.184  34.664  0.00  0.00            
ATOM    108  HW2 HOH X  20      25.341   1.767  35.056  0.00  0.00            
ATOM    109  OW  HOH X  21      16.573   5.487  35.912  0.00  0.00            
ATOM    110  HW1 HOH X  21      17.004   6.022  36.578  0.00  0.00            
ATOM    111  HW2 HOH X  21      16.760   4.584  36.171  0.00  0.00            
ATOM    112  OW  HOH X  22      11.915   4.504  38.067  0.00  0.00            
ATOM    113  HW1 HOH X  22      12.445   5.166  37.624  0.00  0.00            
ATOM    114  HW2 HOH X  22      12.385   3.683  37.921  0.00  0.00            
ATOM    115  OW  HOH X  23       4.582  23.144  33.701  0.00  0.00            
ATOM    116  HW1 HOH X  23       5.363  23.505  33.282  0.00  0.00            
ATOM    117  HW2 HOH X  23       3.864  23.695  33.387  0.00  0.00            
ATOM    118  OW  HOH X  24      19.342  25.700   2.544  0.00  0.00            
ATOM    119  HW1 HOH X  24      18.907  25.377   1.755  0.00  0.00            
ATOM    120  HW2 HOH X  24      19.554  26.612   2.346  0.00  0.00            
ATOM    121  OW  HOH X  25      14.458   6.886  23.472  0.00  0.00            
ATOM    122  HW1 HOH X  25      14.862   7.458  22.820  0.00  0.00            
ATOM    123  HW2 HOH X  25      15.068   6.154  23.561  0.00  0.00            
ATOM    124  OW  HOH X  26      26.358   6.607  25.078  0.00  0.00            
ATOM    125  HW1 HOH X  26      26.004   5.761  24.803  0.00  0.00            
ATOM    126  HW2 HOH X  26      25.733   6.928  25.729  0.00  0.00            
ATOM    127  OW  HOH X  27       2.814  10.607  21.601  0.00  0.00            
ATOM    128  HW1 HOH X  27       3.263  10.343  22.404  0.00  0.00            
ATOM    129  HW2 HOH X  27       3.400  10.328  20.896  0.00  0.00            
ATOM    130  OW  HOH X  28       9.557  18.350  36.338  0.00  0.00            
ATOM    131  HW1 HOH X  28       9.590  18.935  35.580  0.00  0.00            
ATOM    132  HW2 HOH X  28       8.952  18.777  36.944  0.00  0.00            
ATOM    133  OW  HOH X  29      20.556  15.240  25.219  0.00  0.00            
ATOM    134  HW1 HOH X  29      20.805  14.434  25.672  0.00  0.00            
ATOM    135  HW2 HOH X  29      21.381  15.706  25.087  0.00  0.00            
ATOM    136  OW  HOH X  30      15.184  24.096  34.900  0.00  0.00            
ATOM    137  HW1 HOH X  30      15.843  23.462  35.183  0.00  0.00            
ATOM    138  HW2 HOH X  30      15.083  23.935  33.962  0.00  0.00            
ATOM    139  OW  HOH X  31      22.841  29.121  35.426  0.00  0.00            
ATOM    140  HW1 HOH X  31      22.129  29.683  35.120  0.00  0.00            
ATOM    141  HW2 HOH X  31      23.090  28.609  34.657  0.00  0.00            
ATOM    142  OW  HOH X  32      28.970  24.713  12.756  0.00  0.00            
ATOM    143  HW1 HOH X  32      29.580  25.397  13.032  0.00  0.00            
ATOM    144  HW2 HOH X  32      28.302  25.177  12.251  0.00  0.00            
ATOM    145  OW  HOH X  33      10.157  23.833  21.701  0.00  0.00            
ATOM    146  HW1 HOH X  33       9.523  23.931  20.991  0.00  0.00            
ATOM    147  HW2 HOH X  33       9.632  23.881  22.500  0.00  0.00            
ATOM    148  OW  HOH X  34      11.396  22.227   3.886  0.00  0.00            
ATOM    149  HW1 HOH X  34      10.630  21.735   4.183  0.00  0.00            
ATOM    150  HW2 HOH X  34      12.091  21.572   3.821  0.00  0.00            
ATOM    151  OW  HOH X  35      24.661  20.646   4.772  0.00  0.00            
ATOM    152  HW1 HOH X  35      23.851  21.066   4.484  0.00  0.00            
ATOM    153  HW2 HOH X  35      25.344  21.293   4.593  0.00  0.00            
ATOM    154  OW  HOH X  36      28.787   9.350  18.706  0.00  0.00            
ATOM    155  HW1 HOH X  36      29.619   9.608  19.103  0.00  0.00            
ATOM    156  HW2 HOH X  36      28.134   9.903  19.135  0.00  0.00            
ATOM    157  OW  HOH X  37       9.541   2.446  36.266  0.00  0.00            
ATOM    158  HW1 HOH X  37      10.173   2.051  36.866  0.00  0.00            
ATOM    159  HW2 HOH X  37       8.760   1.898  36.344  0.00  0.00            
ATOM    160  OW  HOH X  38      12.941   2.627   8.784  0.00  0.00            
ATOM    161  HW1 HOH X  38      13.506   2.052   8.267  0.00  0.00            
ATOM    162  HW2 HOH X  38      12.568   3.235   8.146  0.00  0.00            
ATOM    163  OW  HOH X  39       5.853  14.435  10.357  0.00  0.00            
ATOM    164  HW1 HOH X  39       6.513  13.877   9.944  0.00  0.00            
ATOM    165  HW2 HOH X  39       5.316  14.751   9.630  0.00  0.00            
ATOM    166  OW  HOH X  40       4.607  10.640  19.307  0.00  0.00            
ATOM    167  HW1 HOH X  40       5.162  10.845  18.555  0.00  0.00            
ATOM    168  HW2 HOH X  40       4.410  11.491  19.699  0.00  0.00            
ATOM    169  OW  HOH X  41      29.920  13.669   4.860  0.00  0.00            
ATOM    170  HW1 HOH X  41      29.051  13.740   4.467  0.00  0.00            
ATOM    171  HW2 HOH X  41      30.102  12.729   4.872  0.00  0.00            
ATOM    172  OW  HOH X  42      17.501  21.689  15.639  0.00  0.00            
ATOM    173  HW1 HOH X  42      16.808  22.082  16.169  0.00  0.00            
ATOM    174  HW2 HOH X  42      17.968  22.434  15.262  0.00  0.00            
ATOM    175  OW  HOH X  43       9.645   7.139  35.325  0.00  0.00            
ATOM    176  HW1 HOH X  43       9.007   7.623  34.800  0.00  0.00            
ATOM    177  HW2 HOH X  43       9.391   7.314  36.232  0.00  0.00            
ATOM    178  OW  HOH X  44       2.384  13.561  35.922  0.00  0.00            
ATOM    179  HW1 HOH X  44       3.120  13.003  36.173  0.00  0.00            
ATOM    180  HW2 HOH X  44       2.749  14.161  35.272  0.00  0.00            
ATOM    181  OW  HOH X  45      28.157  18.332  11.838  0.00  0.00            
ATOM    182  HW1 HOH X  45      27.419  18.477  12.429  0.00  0.00            
ATOM    183  HW2 HOH X  45      28.164  17.386  11.690  0.00  0.00            
ATOM    184  OW  HOH X  46      28.931  13.293  35.250  0.00  0.00            
ATOM    185  HW1 HOH X  46      28.480  13.898  35.839  0.00  0.00            
ATOM    186  HW2 HOH X  46      29.376  13.859  34.620  0.00  0.00            
ATOM    187  OW  HOH X  47       0.660  18.695   5.560  0.00  0.00            
ATOM    188  HW1 HOH X  47       0.120  17.925   5.742  0.00  0.00            
ATOM    189  HW2 HOH X  47       1.125  18.861   6.379  0.00  0.00            
ATOM    190  OW  HOH X  48       4.438  22.068  36.303  0.00  0.00            
ATOM    191  HW1 HOH X  48       3.507  22.228  36.460  0.00  0.00            
ATOM    192  HW2 HOH X  48       4.539  22.153  35.355  0.00  0.00            
ATOM    193  OW  HOH X  49      25.051  18.629  16.157  0.00  0.00            
ATOM    194  HW1 HOH X  49      24.392  19.263  15.875  0.00  0.00            
ATOM    195  HW2 HOH X  49      25.571  18.457  15.372  0.00  0.00            
ATOM    196  OW  HOH X  50      12.394  25.388   8.265  0.00  0.00            
ATOM    197  HW1 HOH X  50      12.163  25.201   7.355  0.00  0.00            
ATOM    198  HW2 HOH X  50      12.011  26.248   8.438  0.00  0.00            
ATOM    199  OW  HOH X  51       5.421  25.864   7.810  0.00  0.00            
ATOM    200  HW1 HOH X  51       6.312  25.528   7.716  0.00  0.00            
ATOM    201  HW2 HOH X  51       5.281  26.397   7.028  0.00  0.00            
ATOM    202  OW  HOH X  52       6.019  26.885  14.472  0.00  0.00            
ATOM    203  HW1 HOH X  52       5.970  27.243  13.585  0.00  0.00            
ATOM    204  HW2 HOH X  52       6.387  27.596  14.997  0.00  0.00            
ATOM    205  OW  HOH X  53      25.561  22.303  35.947  0.00  0.00            
ATOM    206  HW1 HOH X  53      25.605  23.175  36.339  0.00  0.00            
ATOM    207  HW2 HOH X  53      24.704  22.274  35.522  0.00  0.00            
ATOM    208  OW  HOH X  54       1.274  26.569  33.971  0.00  0.00            
ATOM    209  HW1 HOH X  54       0.856  27.307  34.413  0.00  0.00            
ATOM    210  HW2 HOH X  54       1.956  26.968  33.430  0.00  0.00            
ATOM    211  OW  HOH X  55      29.335   9.714  33.090  0.00  0.00            
ATOM    212  HW1 HOH X  55      29.691  10.380  32.502  0.00  0.00            
ATOM    213  HW2 HOH X  55      28.680   9.255  32.563  0.00  0.00            
ATOM    214  OW  HOH X  56      12.794  22.251  26.711  0.00  0.00            
ATOM    215  HW1 HOH X  56      13.340  22.824  27.248  0.00  0.00            
ATOM    216  HW2 HOH X  56      13.178  21.381  26.821  0.00  0.00            
ATOM    217  OW  HOH X  57      21.887   7.104   6.891  0.00  0.00            
ATOM    218  HW1 HOH X  57      21.845   7.333   7.819  0.00  0.00            
ATOM    219  HW2 HOH X  57      22.266   7.876   6.469  0.00  0.00            
ATOM    220  OW  HOH X  58       9.708  27.514  21.298  0.00  0.00            
ATOM    221  HW1 HOH X  58       8.982  27.927  21.766  0.00  0.00            
ATOM    222  HW2 HOH X  58      10.101  28.224  20.791  0.00  0.00            
ATOM    223  OW  HOH X  59      23.506  24.414  31.136  0.00  0.00            
ATOM    224  HW1 HOH X  59      24.205  23.763  31.193  0.00  0.00            
ATOM    225  HW2 HOH X  59      23.826  25.156  31.649  0.00  0.00            
ATOM    226  OW  HOH X  60      28.602  11.247  12.566  0.00  0.00            
ATOM    227  HW1 HOH X  60      27.994  10.937  13.238  0.00  0.00            
ATOM    228  HW2 HOH X  60      28.388  10.727  11.792  0.00  0.00            
ATOM    229  OW  HOH X  61       8.627   9.168  25.682  0.00  0.00            
ATOM    230  HW1 HOH X  61       7.993   9.636  26.226  0.00  0.00            
ATOM    231  HW2 HOH X  61       9.130   8.639  26.300  0.00  0.00            
ATOM    232  OW  HOH X  62       0.323   4.618  39.542  0.00  0.00            
ATOM    233  HW1 HOH X  62       0.769   5.452  39.390  0.00  0.00            
ATOM    234  HW2 HOH X  62       0.132   4.615  40.480  0.00  0.00            
ATOM    235  OW  HOH X  63      11.531   4.077   1.077  0.00  0.00            
ATOM    236  HW1 HOH X  63      12.151   3.358   1.196  0.00  0.00            
ATOM    237  HW2 HOH X  63      11.752   4.446   0.222  0.00  0.00            
ATOM    238  OW  HOH X  64       7.109  18.032  10.753  0.00  0.00            
ATOM    239  HW1 HOH X  64       7.625  18.815  10.562  0.00  0.00            
ATOM    240  HW2 HOH X  64       7.541  17.334  10.261  0.00  0.00            
ATOM    241  OW  HOH X  65       8.315  22.685  34.289  0.00  0.00            
ATOM    242  HW1 HOH X  65       8.490  22.886  35.208  0.00  0.00            
ATOM    243  HW2 HOH X  65       7.914  23.482  33.941  0.00  0.00            
ATOM    244  OW  HOH X  66       6.832   1.368  33.815  0.00  0.00            
ATOM    245  HW1 HOH X  66       6.810   2.227  34.236  0.00  0.00            
ATOM    246  HW2 HOH X  66       7.496   1.452  33.131  0.00  0.00            
ATOM    247  OW  HOH X  67      20.718  22.152  32.143  0.00  0.00            
ATOM    248  HW1 HOH X  67      20.932  22.709  31.394  0.00  0.00            
ATOM    249  HW2 HOH X  67      20.762  22.739  32.898  0.00  0.00            
ATOM    250  OW  HOH X  68      29.188  14.959   0.862  0.00  0.00            
ATOM    251  HW1 HOH X  68      28.843  14.208   0.379  0.00  0.00            
ATOM    252  HW2 HOH X  68      28.419  15.358   1.267  0.00  0.00            
ATOM    253  OW  HOH X  69       3.924   9.551  23.883  0.00  0.00            
ATOM    254  HW1 HOH X  69       4.390   8.835  23.451  0.00  0.00            
ATOM    255  HW2 HOH X  69       3.535   9.150  24.659  0.00  0.00            
ATOM    256  OW  HOH X  70       5.118  14.616   3.319  0.00  0.00            
ATOM    257  HW1 HOH X  70       5.799  14.027   2.995  0.00  0.00            
ATOM    258  HW2 HOH X  70       4.356  14.051   3.452  0.00  0.00            
ATOM    259  OW  HOH X  71      15.994  14.362   7.655  0.00  0.00            
ATOM    260  HW1 HOH X  71      16.119  13.853   8.456  0.00  0.00            
ATOM    261  HW2 HOH X  71      15.268  14.953   7.858  0.00  0.00            
ATOM    262  OW  HOH X  72       5.390  24.599  36.957  0.00  0.00            
ATOM    263  HW1 HOH X  72       5.339  23.687  36.669  0.00  0.00            
ATOM    264  HW2 HOH X  72       4.650  24.704  37.554  0.00  0.00            
ATOM    265  OW  HOH X  73       8.339   6.467  15.473  0.00  0.00            
ATOM    266  HW1 HOH X  73       9.230   6.220  15.224  0.00  0.00            
ATOM    267  HW2 HOH X  73       7.776   5.920  14.927  0.00  0.00            
ATOM    268  OW  HOH X  74      14.149   6.207  31.002  0.00  0.00            
ATOM    269  HW1 HOH X  74      14.897   6.762  31.223  0.00  0.00            
ATOM    270  HW2 HOH X  74      14.441   5.704  30.242  0.00  0.00            
ATOM    271  OW  HOH X  75      28.980  12.615   9.680  0.00  0.00            
ATOM    272  HW1 HOH X  75      29.008  11.687   9.916  0.00  0.00            
ATOM    273  HW2 HOH X  75      28.164  12.935  10.066  0.00  0.00            
ATOM    274  OW  HOH X  76      22.292   7.843   9.755  0.00  0.00            
ATOM    275  HW1 HOH X  76      22.436   8.454  10.478  0.00  0.00            
ATOM    276  HW2 HOH X  76      22.670   7.018  10.060  0.00  0.00            
ATOM    277  OW  HOH X  77      10.397   8.948  21.130  0.00  0.00            
ATOM    278  HW1 HOH X  77       9.934   9.163  20.319  0.00  0.00            
ATOM    279  HW2 HOH X  77      11.323   8.975  20.891  0.00  0.00            
ATOM    280  OW  HOH X  78       6.644   5.976  17.767  0.00  0.00            
ATOM    281  HW1 HOH X  78       7.435   6.515  17.762  0.00  0.00            
ATOM    282  HW2 HOH X  78       6.446   5.832  16.841  0.00  0.00            
ATOM    283  OW  HOH X  79      26.381  22.996  28.723  0.00  0.00            
ATOM    284  HW1 HOH X  79      26.310  23.949  28.786  0.00  0.00            
ATOM    285  HW2 HOH X  79      25.488  22.701  28.542  0.00  0.00            
ATOM    286  OW  HOH X  80       4.015   3.823   8.320  0.00  0.00            
ATOM    287  HW1 HOH X  80       3.216   3.907   8.841  0.00  0.00            
ATOM    288  HW2 HOH X  80       4.707   3.676   8.965  0.00  0.00            
ATOM    289  OW  HOH X  81      20.473  19.196  32.160  0.00  0.00            
ATOM    290  HW1 HOH X  81      20.236  19.755  31.420  0.00  0.00            
ATOM    291  HW2 HOH X  81      20.852  19.796  32.803  0.00  0.00            
ATOM    292  OW  HOH X  82      23.975  22.184  24.358  0.00  0.00            
ATOM    293  HW1 HOH X  82      23.038  21.991  24.395  0.00  0.00            
ATOM    294  HW2 HOH X  82      24.059  23.044  24.771  0.00  0.00            
ATOM    295  OW  HOH X  83      15.244  18.431  27.175  0.00  0.00            
ATOM    296  HW1 HOH X  83      14.858  18.256  28.034  0.00  0.00            
ATOM    297  HW2 HOH X  83      15.858  19.149  27.330  0.00  0.00            
ATOM    298  OW  HOH X  84      27.631  29.595  35.293  0.00  0.00            
ATOM    299  HW1 HOH X  84      26.838  29.894  35.737  0.00  0.00            
ATOM    300  HW2 HOH X  84      27.480  28.663  35.133  0.00  0.00            
ATOM    301  OW  HOH X  85       4.925   4.022  22.702  0.00  0.00            
ATOM    302  HW1 HOH X  85       5.790   4.431  22.701  0.00  0.00            
ATOM    303  HW2 HOH X  85       4.381   4.612  23.223  0.00  0.00            
ATOM    304  OW  HOH X  86      16.589   3.844   4.550  0.00  0.00            
ATOM    305  HW1 HOH X  86      17.193   3.418   5.158  0.00  0.00            
ATOM    306  HW2 HOH X  86      16.039   4.396   5.106  0.00  0.00            
ATOM    307  OW  HOH X  87       9.283  29.007   4.097  0.00  0.00            
ATOM    308  HW1 HOH X  87       8.697  28.573   4.717  0.00  0.00            
ATOM    309  HW2 HOH X  87       8.780  29.053   3.284  0.00  0.00            
ATOM    310  OW  HOH X  88      21.141  13.190  26.832  0.00  0.00            
ATOM    311  HW1 HOH X  88      21.877  12.647  26.551  0.00  0.00            
ATOM    312  HW2 HOH X  88      21.311  13.365  27.757  0.00  0.00            
ATOM    313  OW  HOH X  89      22.041  25.080  12.399  0.00  0.00            
ATOM    314  HW1 HOH X  89      22.590  25.828  12.164  0.00  0.00            
ATOM    315  HW2 HOH X  89      22.320  24.382  11.807  0.00  0.00            
ATOM    316  OW  HOH X  90      16.040  12.824  40.161  0.00  0.00            
ATOM    317  HW1 HOH X  90      15.642  13.507  39.620  0.00  0.00            
ATOM    318  HW2 HOH X  90      16.941  12.762  39.844  0.00  0.00            
ATOM    319  OW  HOH X  91      22.220   5.921  25.699  0.00  0.00            
ATOM    320  HW1 HOH X  91      21.331   6.271  25.642  0.00  0.00            
ATOM    321  HW2 HOH X  91      22.279   5.296  24.977  0.00  0.00            
ATOM    322  OW  HOH X  92      25.143  18.789  30.982  0.00  0.00            
ATOM    323  HW1 HOH X  92      25.076  18.941  31.925  0.00  0.00            
ATOM    324  HW2 HOH X  92      24.332  18.335  30.754  0.00  0.00            
ATOM    325  OW  HOH X  93      18.860  15.493   2.907  0.00  0.00            
ATOM    326  HW1 HOH X  93      19.250  16.360   3.013  0.00  0.00            
ATOM    327  HW2 HOH X  93      18.697  15.191   3.800  0.00  0.00            
ATOM    328  OW  HOH X  94      19.382   4.259  16.953  0.00  0.00            
ATOM    329  HW1 HOH X  94      19.023   3.670  16.289  0.00  0.00            
ATOM    330  HW2 HOH X  94      18.878   4.066  17.743  0.00  0.00            
ATOM    331  OW  HOH X  95       4.624  12.270  37.094  0.00  0.00            
ATOM    332  HW1 HOH X  95       4.342  11.440  37.480  0.00  0.00            
ATOM    333  HW2 HOH X  95       5.436  12.485  37.552  0.00  0.00            
ATOM    334  OW  HOH X  96      18.599  24.049  33.943  0.00  0.00            
ATOM    335  HW1 HOH X  96      19.491  24.287  34.195  0.00  0.00            
ATOM    336  HW2 HOH X  96      18.539  23.112  34.129  0.00  0.00            
ATOM    337  OW  HOH X  97      22.699  16.687   5.814  0.00  0.00            
ATOM    338  HW1 HOH X  97      22.693  16.097   5.060  0.00  0.00            
ATOM    339  HW2 HOH X  97      22.631  16.107   6.573  0.00  0.00            
ATOM    340  OW  HOH X  98       3.015  25.317   5.374  0.00  0.00            
ATOM    341  HW1 HOH X  98       3.120  24.397   5.133  0.00  0.00            
ATOM    342  HW2 HOH X  98       2.378  25.659   4.747  0.00  0.00            
ATOM    343  OW  HOH X  99      25.126   9.141   9.085  0.00  0.00            
ATOM    344  HW1 HOH X  99      25.637   8.332   9.080  0.00  0.00            
ATOM    345  HW2 HOH X  99      25.594   9.726   8.489  0.00  0.00            
ATOM    346  OW  HOH X 100       5.842  20.627  24.741  0.00  0.00            
ATOM    347  HW1 HOH X 100       5.593  19.869  24.212  0.00  0.00            
ATOM    348  HW2 HOH X 100       6.345  21.181  24.144  0.00  0.00            
ATOM    349  OW  HOH X 101       8.750  26.652  24.694  0.00  0.00            
ATOM    350  HW1 HOH X 101       8.462  27.179  23.949  0.00  0.00            
ATOM    351  HW2 HOH X 101       8.561  27.195  25.459  0.00  0.00            
ATOM    352  OW  HOH X 102      19.576   0.238  25.041  0.00  0.00            
ATOM    353  HW1 HOH X 102      19.328   0.910  24.405  0.00  0.00            
ATOM    354  HW2 HOH X 102      20.075  -0.400  24.532  0.00  0.00            
ATOM    355  OW  HOH X 103       7.335  14.203  28.821  0.00  0.00            
ATOM    356  HW1 HOH X 103       8.070  14.171  28.209  0.00  0.00            
ATOM    357  HW2 HOH X 103       7.733  14.064  29.681  0.00  0.00            
ATOM    358  OW  HOH X 104       7.615  13.352   2.661  0.00  0.00            
ATOM    359  HW1 HOH X 104       8.087  12.711   3.192  0.00  0.00            
ATOM    360  HW2 HOH X 104       7.589  12.966   1.785  0.00  0.00            
ATOM    361  OW  HOH X 105      17.839  10.200   0.529  0.00  0.00            
ATOM    362  HW1 HOH X 105      18.053  10.281   1.458  0.00  0.00            
ATOM    363  HW2 HOH X 105      18.371  10.870   0.100  0.00  0.00            
ATOM    364  OW  HOH X 106      13.774   8.825  28.125  0.00  0.00            
ATOM    365  HW1 HOH X 106      14.545   8.343  27.825  0.00  0.00            
ATOM    366  HW2 HOH X 106      13.044   8.430  27.650  0.00  0.00            
ATOM    367  OW  HOH X 107       6.526  15.869  35.889  0.00  0.00            
ATOM    368  HW1 HOH X 107       7.137  15.770  36.619  0.00  0.00            
ATOM    369  HW2 HOH X 107       5.808  16.391  36.247  0.00  0.00            
ATOM    370  OW  HOH X 108      10.206  26.454   3.541  0.00  0.00            
ATOM    371  HW1 HOH X 108      10.095  27.258   4.049  0.00  0.00            
ATOM    372  HW2 HOH X 108      10.131  25.751   4.186  0.00  0.00            
ATOM    373  OW  HOH X 109       2.410   9.072  10.261  0.00  0.00            
ATOM    374  HW1 HOH X 109       1.675   9.554  10.640  0.00  0.00            
ATOM    375  HW2 HOH X 109       2.232   9.064   9.321  0.00  0.00            
ATOM    376  OW  HOH X 110       8.128   6.205   7.559  0.00  0.00            
ATOM    377  HW1 HOH X 110       7.621   5.895   6.809  0.00  0.00            
ATOM    378  HW2 HOH X 110       7.485   6.635   8.123  0.00  0.00            
ATOM    379  OW  HOH X 111      10.442  20.879  23.082  0.00  0.00            
ATOM    380  HW1 HOH X 111      10.287  20.482  23.939  0.00  0.00            
ATOM    381  HW2 HOH X 111      11.017  21.623  23.262  0.00  0.00            
ATOM    382  OW  HOH X 112       4.980   5.352  29.092  0.00  0.00            
ATOM    383  HW1 HOH X 112       4.356   4.706  29.422  0.00  0.00            
ATOM    384  HW2 HOH X 112       4.477   5.876  28.468  0.00  0.00            
ATOM    385  OW  HOH X 113       5.344  22.789  27.166  0.00  0.00            
ATOM    386  HW1 HOH X 113       6.255  22.497  27.151  0.00  0.00            
ATOM    387  HW2 HOH X 113       4.833  21.988  27.040  0.00  0.00            
ATOM    388  OW  HOH X 114      13.416  15.100   1.605  0.00  0.00            
ATOM    389  HW1 HOH X 114      14.284  15.207   1.995  0.00  0.00            
ATOM    390  HW2 HOH X 114      13.457  14.255   1.157  0.00  0.00            
ATOM    391  OW  HOH X 115       9.966  16.169  11.128  0.00  0.00            
ATOM    392  HW1 HOH X 115      10.643  15.492  11.114  0.00  0.00            
ATOM    393  HW2 HOH X 115       9.488  16.012  11.942  0.00  0.00            
ATOM    394  OW  HOH X 116       8.489   3.574   8.910  0.00  0.00            
ATOM    395  HW1 HOH X 116       8.648   4.448   8.551  0.00  0.00            
ATOM    396  HW2 HOH X 116       9.101   3.007   8.440  0.00  0.00            
ATOM    397  OW  HOH X 117      20.576  28.344  18.272  0.00  0.00            
ATOM    398  HW1 HOH X 117      20.116  27.667  18.769  0.00  0.00            
ATOM    399  HW2 HOH X 117      21.339  28.558  18.809  0.00  0.00            
ATOM    400  OW  HOH X 118       9.488   8.401  28.618  0.00  0.00            
ATOM    401  HW1 HOH X 118       9.952   7.726  29.111  0.00  0.00            
ATOM    402  HW2 HOH X 118       9.882   9.224  28.908  0.00  0.00            
ATOM    403  OW  HOH X 119      24.942  22.669   7.763  0.00  0.00            
ATOM    404  HW1 HOH X 119      24.550  21.796   7.729  0.00  0.00            
ATOM    405  HW2 HOH X 119      25.777  22.574   7.303  0.00  0.00            
ATOM    406  OW  HOH X 120       2.919   6.978  27.486  0.00  0.00            
ATOM    407  HW1 HOH X 120       3.029   7.550  28.245  0.00  0.00            
ATOM    408  HW2 HOH X 120       1.983   7.019  27.288  0.00  0.00            
ATOM    409  OW  HOH X 121      12.527  13.149  40.127  0.00  0.00            
ATOM    410  HW1 HOH X 121      12.376  12.205  40.175  0.00  0.00            
ATOM    411  HW2 HOH X 121      12.501  13.348  39.191  0.00  0.00            
ATOM    412  OW  HOH X 122       5.158   6.756  19.723  0.00  0.00            
ATOM    413  HW1 HOH X 122       5.647   7.255  20.377  0.00  0.00            
ATOM    414  HW2 HOH X 122       5.806   6.542  19.051  0.00  0.00            
ATOM    415  OW  HOH X 123       3.246  25.098  20.430  0.00  0.00            
ATOM    416  HW1 HOH X 123       3.808  24.755  19.735  0.00  0.00            
ATOM    417  HW2 HOH X 123       2.785  24.330  20.767  0.00  0.00            
ATOM    418  OW  HOH X 124      11.631  13.791  11.574  0.00  0.00            
ATOM    419  HW1 HOH X 124      10.921  13.183  11.370  0.00  0.00            
ATOM    420  HW2 HOH X 124      12.378  13.228  11.779  0.00  0.00            
ATOM    421  OW  HOH X 125      26.432  20.757  25.462  0.00  0.00            
ATOM    422  HW1 HOH X 125      26.102  21.588  25.805  0.00  0.00            
ATOM    423  HW2 HOH X 125      26.229  20.118  26.145  0.00  0.00            
ATOM    424  OW  HOH X 126      28.476  15.077  37.542  0.00  0.00            
ATOM    425  HW1 HOH X 126      28.319  16.021  37.550  0.00  0.00            
ATOM    426  HW2 HOH X 126      27.704  14.702  37.968  0.00  0.00            
ATOM    427  OW  HOH X 127      25.185  24.024  12.927  0.00  0.00            
ATOM    428  HW1 HOH X 127      25.156  24.317  12.017  0.00  0.00            
ATOM    429  HW2 HOH X 127      25.966  23.472  12.976  0.00  0.00            
ATOM    430  OW  HOH X 128      14.360  24.987  12.033  0.00  0.00            
ATOM    431  HW1 HOH X 128      15.189  24.531  12.177  0.00  0.00            
ATOM    432  HW2 HOH X 128      14.613  25.841  11.683  0.00  0.00            
ATOM    433  OW  HOH X 129      10.979  12.527   7.553  0.00  0.00            
ATOM    434  HW1 HOH X 129      11.258  12.706   6.655  0.00  0.00            
ATOM    435  HW2 HOH X 129      11.373  13.229   8.071  0.00  0.00            
ATOM    436  OW  HOH X 130      24.892   4.983  28.073  0.00  0.00            
ATOM    437  HW1 HOH X 130      24.895   5.823  27.614  0.00  0.00            
ATOM    438  HW2 HOH X 130      23.965   4.766  28.169  0.00  0.00            
ATOM    439  OW  HOH X 131      16.367  24.499  31.938  0.00  0.00            
ATOM    440  HW1 HOH X 131      16.839  23.666  31.954  0.00  0.00            
ATOM    441  HW2 HOH X 131      16.862  25.067  32.528  0.00  0.00            
ATOM    442  OW  HOH X 132      15.446  12.699  14.239  0.00  0.00            
ATOM    443  HW1 HOH X 132      15.668  12.441  15.134  0.00  0.00            
ATOM    444  HW2 HOH X 132      15.957  13.493  14.084  0.00  0.00            
ATOM    445  OW  HOH X 133      18.411  21.842  10.223  0.00  0.00            
ATOM    446  HW1 HOH X 133      18.027  22.405   9.551  0.00  0.00            
ATOM    447  HW2 HOH X 133      18.054  20.973  10.041  0.00  0.00            
ATOM    448  OW  HOH X 134      26.588  10.573   7.065  0.00  0.00            
ATOM    449  HW1 HOH X 134      27.326  10.133   6.643  0.00  0.00            
ATOM    450  HW2 HOH X 134      25.912  10.609   6.388  0.00  0.00            
ATOM    451  OW  HOH X 135       1.937  13.603  31.125  0.00  0.00            
ATOM    452  HW1 HOH X 135       2.003  14.429  30.645  0.00  0.00            
ATOM    453  HW2 HOH X 135       0.997  13.439  31.194  0.00  0.00            
ATOM    454  OW  HOH X 136      15.321  26.564   1.734  0.00  0.00            
ATOM    455  HW1 HOH X 136      15.614  25.680   1.513  0.00  0.00            
ATOM    456  HW2 HOH X 136      14.778  26.830   0.992  0.00  0.00            
ATOM    457  OW  HOH X 137       3.349   4.826  19.921  0.00  0.00            
ATOM    458  HW1 HOH X 137       3.771   5.682  19.849  0.00  0.00            
ATOM    459  HW2 HOH X 137       3.513   4.553  20.824  0.00  0.00            
ATOM    460  OW  HOH X 138      20.913  10.246  38.125  0.00  0.00            
ATOM    461  HW1 HOH X 138      20.632  10.028  37.236  0.00  0.00            
ATOM    462  HW2 HOH X 138      21.783   9.854  38.204  0.00  0.00            
ATOM    463  OW  HOH X 139       0.020  28.982  38.029  0.00  0.00            
ATOM    464  HW1 HOH X 139      -0.376  28.547  38.784  0.00  0.00            
ATOM    465  HW2 HOH X 139       0.760  29.468  38.392  0.00  0.00            
ATOM    466  OW  HOH X 140      15.617  27.034  25.219  0.00  0.00            
ATOM    467  HW1 HOH X 140      15.320  27.489  24.431  0.00  0.00            
ATOM    468  HW2 HOH X 140      15.194  26.177  25.175  0.00  0.00            
ATOM    469  OW  HOH X 141       0.659  20.970  34.897  0.00  0.00            
ATOM    470  HW1 HOH X 141       1.440  21.063  34.352  0.00  0.00            
ATOM    471  HW2 HOH X 141       0.982  20.604  35.720  0.00  0.00            
ATOM    472  OW  HOH X 142      21.043  22.666  26.334  0.00  0.00            
ATOM    473  HW1 HOH X 142      20.586  22.781  27.167  0.00  0.00            
ATOM    474  HW2 HOH X 142      20.589  21.937  25.910  0.00  0.00            
ATOM    475  OW  HOH X 143       4.599  30.039  38.675  0.00  0.00            
ATOM    476  HW1 HOH X 143       4.708  29.463  37.919  0.00  0.00            
ATOM    477  HW2 HOH X 143       5.483  30.354  38.866  0.00  0.00            
ATOM    478  OW  HOH X 144      20.669   3.858  35.464  0.00  0.00            
ATOM    479  HW1 HOH X 144      21.310   4.550  35.624  0.00  0.00            
ATOM    480  HW2 HOH X 144      19.947   4.056  36.061  0.00  0.00            
ATOM    481  OW  HOH X 145      26.348  25.402  19.318  0.00  0.00            
ATOM    482  HW1 HOH X 145      25.575  25.606  18.791  0.00  0.00            
ATOM    483  HW2 HOH X 145      26.701  26.256  19.566  0.00  0.00            
ATOM    484  OW  HOH X 146      24.524  29.944  21.592  0.00  0.00            
ATOM    485  HW1 HOH X 146      24.271  29.924  22.515  0.00  0.00            
ATOM    486  HW2 HOH X 146      25.428  29.629  21.584  0.00  0.00            
ATOM    487  OW  HOH X 147      16.267  17.078  15.505  0.00  0.00            
ATOM    488  HW1 HOH X 147      16.849  17.832  15.413  0.00  0.00            
ATOM    489  HW2 HOH X 147      15.391  17.431  15.351  0.00  0.00            
ATOM    490  OW  HOH X 148       4.128   0.422  14.545  0.00  0.00            
ATOM    491  HW1 HOH X 148       3.739  -0.307  14.061  0.00  0.00            
ATOM    492  HW2 HOH X 148       3.982   1.186  13.987  0.00  0.00            
ATOM    493  OW  HOH X 149      21.450  29.743   7.779  0.00  0.00            
ATOM    494  HW1 HOH X 149      21.095  29.747   8.668  0.00  0.00            
ATOM    495  HW2 HOH X 149      21.040  28.987   7.361  0.00  0.00            
ATOM    496  OW  HOH X 150       0.889   1.416  39.733  0.00  0.00            
ATOM    497  HW1 HOH X 150       0.491   0.902  40.436  0.00  0.00            
ATOM    498  HW2 HOH X 150       0.316   2.176  39.637  0.00  0.00            
ATOM    499  OW  HOH X 151      26.470   9.072  28.000  0.00  0.00            
ATOM    500  HW1 HOH X 151      26.246   8.456  27.303  0.00  0.00            
ATOM    501  HW2 HOH X 151      27.415   8.971  28.116  0.00  0.00            
ATOM    502  OW  HOH X 152      18.618   3.332   6.628  0.00  0.00            
ATOM    503  HW1 HOH X 152      18.392   3.401   7.556  0.00  0.00            
ATOM    504  HW2 HOH X 152      19.448   3.802   6.548  0.00  0.00            
ATOM    505  OW  HOH X 153       0.516  22.512  13.877  0.00  0.00            
ATOM    506  HW1 HOH X 153      -0.085  22.863  13.220  0.00  0.00            
ATOM    507  HW2 HOH X 153       0.456  21.562  13.775  0.00  0.00            
ATOM    508  OW  HOH X 154       8.151  29.316  23.041  0.00  0.00            
ATOM    509  HW1 HOH X 154       7.894  29.848  23.794  0.00  0.00            
ATOM    510  HW2 HOH X 154       7.492  29.511  22.374  0.00  0.00            
ATOM    511  OW  HOH X 155       6.818  24.152  16.416  0.00  0.00            
ATOM    512  HW1 HOH X 155       6.943  23.228  16.637  0.00  0.00            
ATOM    513  HW2 HOH X 155       7.289  24.267  15.590  0.00  0.00            
ATOM    514  OW  HOH X 156      27.861  22.419  31.138  0.00  0.00            
ATOM    515  HW1 HOH X 156      28.776  22.635  30.958  0.00  0.00            
ATOM    516  HW2 HOH X 156      27.394  22.673  30.342  0.00  0.00            
ATOM    517  OW  HOH X 157      17.471  23.582   8.153  0.00  0.00            
ATOM    518  HW1 HOH X 157      16.571  23.258   8.132  0.00  0.00            
ATOM    519  HW2 HOH X 157      17.385  24.516   8.344  0.00  0.00            
ATOM    520  OW  HOH X 158       3.106  20.245   3.410  0.00  0.00            
ATOM    521  HW1 HOH X 158       2.353  19.749   3.088  0.00  0.00            
ATOM    522  HW2 HOH X 158       3.398  19.764   4.184  0.00  0.00            
ATOM    523  OW  HOH X 159      11.943   1.763  17.125  0.00  0.00            
ATOM    524  HW1 HOH X 159      12.761   2.246  17.242  0.00  0.00            
ATOM    525  HW2 HOH X 159      12.089   1.232  16.341  0.00  0.00            
ATOM    526  OW  HOH X 160      17.581   7.700  39.308  0.00  0.00            
ATOM    527  HW1 HOH X 160      17.655   7.869  38.369  0.00  0.00            
ATOM    528  HW2 HOH X 160      17.765   8.545  39.719  0.00  0.00            
ATOM    529  OW  HOH X 161      18.646  25.127  27.778  0.00  0.00            
ATOM    530  HW1 HOH X 161      18.418  26.007  28.078  0.00  0.00            
ATOM    531  HW2 HOH X 161      18.631  24.591  28.571  0.00  0.00            
ATOM    532  OW  HOH X 162       0.809  15.701  27.731  0.00  0.00            
ATOM    533  HW1 HOH X 162       1.244  14.903  27.428  0.00  0.00            
ATOM    534  HW2 HOH X 162       1.099  15.802  28.638  0.00  0.00            
ATOM    535  OW  HOH X 163      23.176  11.518  10.622  0.00  0.00            
ATOM    536  HW1 HOH X 163      23.076  11.810   9.716  0.00  0.00            
ATOM    537  HW2 HOH X 163      23.908  12.033  10.961  0.00  0.00            
ATOM    538  OW  HOH X 164      15.683  18.236  30.428  0.00  0.00            
ATOM    539  HW1 HOH X 164      16.500  18.641  30.137  0.00  0.00            
ATOM    540  HW2 HOH X 164      15.859  17.296  30.406  0.00  0.00            
ATOM    541  OW  HOH X 165      15.910   4.685  27.934  0.00  0.00            
ATOM    542  HW1 HOH X 165      16.541   4.583  28.646  0.00  0.00            
ATOM    543  HW2 HOH X 165      15.189   4.100  28.166  0.00  0.00            
ATOM    544  OW  HOH X 166       1.799  22.134  19.672  0.00  0.00            
ATOM    545  HW1 HOH X 166       2.692  22.265  19.353  0.00  0.00            
ATOM    546  HW2 HOH X 166       1.905  21.914  20.597  0.00  0.00            
ATOM    547  OW  HOH X 167       8.514   8.676  18.246  0.00  0.00            
ATOM    548  HW1 HOH X 167       8.186   8.907  17.377  0.00  0.00            
ATOM    549  HW2 HOH X 167       7.734   8.655  18.800  0.00  0.00            
ATOM    550  OW  HOH X 168      16.507  11.694  19.025  0.00  0.00            
ATOM    551  HW1 HOH X 168      16.718  11.255  18.202  0.00  0.00            
ATOM    552  HW2 HOH X 168      16.513  12.627  18.809  0.00  0.00            
ATOM    553  OW  HOH X 169       7.835   9.549   9.398  0.00  0.00            
ATOM    554  HW1 HOH X 169       7.813   9.427   8.449  0.00  0.00            
ATOM    555  HW2 HOH X 169       6.955   9.853   9.620  0.00  0.00            
ATOM    556  OW  HOH X 170       4.902  16.176  16.162  0.00  0.00            
ATOM    557  HW1 HOH X 170       5.392  15.399  15.890  0.00  0.00            
ATOM    558  HW2 HOH X 170       5.574  16.828  16.357  0.00  0.00            
ATOM    559  OW  HOH X 171       7.948  22.892   2.192  0.00  0.00            
ATOM    560  HW1 HOH X 171       7.580  22.009   2.233  0.00  0.00            
ATOM    561  HW2 HOH X 171       8.762  22.790   1.698  0.00  0.00            
ATOM    562  OW  HOH X 172      22.685   1.944  32.861  0.00  0.00            
ATOM    563  HW1 HOH X 172      23.621   1.745  32.864  0.00  0.00            
ATOM    564  HW2 HOH X 172      22.636   2.868  32.617  0.00  0.00            
ATOM    565  OW  HOH X 173      11.527  14.871  34.080  0.00  0.00            
ATOM    566  HW1 HOH X 173      10.691  15.295  34.273  0.00  0.00            
ATOM    567  HW2 HOH X 173      12.166  15.348  34.610  0.00  0.00            
ATOM    568  OW  HOH X 174      26.458  13.008   8.194  0.00  0.00            
ATOM    569  HW1 HOH X 174      26.538  12.100   7.905  0.00  0.00            
ATOM    570  HW2 HOH X 174      26.108  13.473   7.434  0.00  0.00            
ATOM    571  OW  HOH X 175       7.960  20.578  20.497  0.00  0.00            
ATOM    572  HW1 HOH X 175       8.086  19.935  21.195  0.00  0.00            
ATOM    573  HW2 HOH X 175       7.539  21.322  20.929  0.00  0.00            
ATOM    574  OW  HOH X 176      16.611   1.358  16.654  0.00  0.00            
ATOM    575  HW1 HOH X 176      16.983   2.094  17.140  0.00  0.00            
ATOM    576  HW2 HOH X 176      16.960   0.581  17.092  0.00  0.00            
ATOM    577  OW  HOH X 177       0.645  11.145  35.702  0.00  0.00            
ATOM    578  HW1 HOH X 177       0.646  12.103  35.699  0.00  0.00            
ATOM    579  HW2 HOH X 177      -0.202  10.905  35.327  0.00  0.00            
ATOM    580  OW  HOH X 178       8.503  11.264  12.975  0.00  0.00            
ATOM    581  HW1 HOH X 178       8.536  12.005  12.369  0.00  0.00            
ATOM    582  HW2 HOH X 178       8.999  11.557  13.739  0.00  0.00            
ATOM    583  OW  HOH X 179      23.171  26.794   0.229  0.00  0.00            
ATOM    584  HW1 HOH X 179      22.327  26.352   0.316  0.00  0.00            
ATOM    585  HW2 HOH X 179      23.046  27.410  -0.493  0.00  0.00            
ATOM    586  OW  HOH X 180       8.355   8.178  37.982  0.00  0.00            
ATOM    587  HW1 HOH X 180       7.452   7.900  37.825  0.00  0.00            
ATOM    588  HW2 HOH X 180       8.550   7.871  38.867  0.00  0.00            
ATOM    589  OW  HOH X 181      20.749  16.878  36.394  0.00  0.00            
ATOM    590  HW1 HOH X 181      21.198  17.247  37.155  0.00  0.00            
ATOM    591  HW2 HOH X 181      19.917  17.350  36.354  0.00  0.00            
ATOM    592  OW  HOH X 182       0.617  13.436  38.217  0.00  0.00            
ATOM    593  HW1 HOH X 182       1.040  13.191  37.394  0.00  0.00            
ATOM    594  HW2 HOH X 182      -0.078  14.041  37.958  0.00  0.00            
ATOM    595  OW  HOH X 183      24.300   7.363  26.998  0.00  0.00            
ATOM    596  HW1 HOH X 183      23.735   7.873  27.577  0.00  0.00            
ATOM    597  HW2 HOH X 183      23.698   6.945  26.382  0.00  0.00            
ATOM    598  OW  HOH X 184       9.624  -0.098  17.045  0.00  0.00            
ATOM    599  HW1 HOH X 184       9.210   0.762  16.975  0.00  0.00            
ATOM    600  HW2 HOH X 184      10.514   0.088  17.344  0.00  0.00            
ATOM    601  OW  HOH X 185      17.325   8.085  28.376  0.00  0.00            
ATOM    602  HW1 HOH X 185      16.621   7.897  28.997  0.00  0.00            
ATOM    603  HW2 HOH X 185      17.091   8.932  27.997  0.00  0.00            
ATOM    604  OW  HOH X 186      23.835  18.234  11.800  0.00  0.00            
ATOM    605  HW1 HOH X 186      22.987  17.924  11.481  0.00  0.00            
ATOM    606  HW2 HOH X 186      24.341  18.407  11.006  0.00  0.00            
ATOM    607  OW  HOH X 187      29.283   6.156  28.300  0.00  0.00            
ATOM    608  HW1 HOH X 187      29.192   5.822  27.408  0.00  0.00            
ATOM    609  HW2 HOH X 187      29.321   7.107  28.198  0.00  0.00            
ATOM    610  OW  HOH X 188      13.324   1.931  12.077  0.00  0.00            
ATOM    611  HW1 HOH X 188      13.365   2.817  11.716  0.00  0.00            
ATOM    612  HW2 HOH X 188      12.442   1.862  12.444  0.00  0.00            
ATOM    613  OW  HOH X 189      22.440   4.332  31.122  0.00  0.00            
ATOM    614  HW1 HOH X 189      22.137   4.353  30.214  0.00  0.00            
ATOM    615  HW2 HOH X 189      22.951   5.135  31.223  0.00  0.00            
ATOM    616  OW  HOH X 190       4.184  23.137   3.755  0.00  0.00            
ATOM    617  HW1 HOH X 190       4.037  22.191   3.746  0.00  0.00            
ATOM    618  HW2 HOH X 190       3.972  23.421   2.865  0.00  0.00            
ATOM    619  OW  HOH X 191      23.613   6.740  22.927  0.00  0.00            
ATOM    620  HW1 HOH X 191      23.470   7.441  23.562  0.00  0.00            
ATOM    621  HW2 HOH X 191      23.005   6.934  22.214  0.00  0.00            
ATOM    622  OW  HOH X 192       0.989   1.158  13.995  0.00  0.00            
ATOM    623  HW1 HOH X 192       0.165   0.671  14.004  0.00  0.00            
ATOM    624  HW2 HOH X 192       0.918   1.763  14.733  0.00  0.00            
ATOM    625  OW  HOH X 193       7.134  27.954  29.019  0.00  0.00            
ATOM    626  HW1 HOH X 193       7.718  28.033  28.265  0.00  0.00            
ATOM    627  HW2 HOH X 193       6.848  27.041  29.007  0.00  0.00            
ATOM    628  OW  HOH X 194      28.053  20.986  27.919  0.00  0.00            
ATOM    629  HW1 HOH X 194      28.035  20.394  28.671  0.00  0.00            
ATOM    630  HW2 HOH X 194      27.362  21.623  28.098  0.00  0.00            
ATOM    631  OW  HOH X 195      22.707  10.190   7.360  0.00  0.00            
ATOM    632  HW1 HOH X 195      22.513  11.005   7.823  0.00  0.00            
ATOM    633  HW2 HOH X 195      23.467   9.829   7.817  0.00  0.00            
ATOM    634  OW  HOH X 196       9.600  21.182   8.149  0.00  0.00            
ATOM    635  HW1 HOH X 196       8.712  21.462   8.369  0.00  0.00            
ATOM    636  HW2 HOH X 196       9.803  20.500   8.790  0.00  0.00            
ATOM    637  OW  HOH X 197      14.048  27.822  39.444  0.00  0.00            
ATOM    638  HW1 HOH X 197      13.451  28.333  39.990  0.00  0.00            
ATOM    639  HW2 HOH X 197      13.528  27.586  38.676  0.00  0.00            
ATOM    640  OW  HOH X 198      28.828   5.095  25.259  0.00  0.00            
ATOM    641  HW1 HOH X 198      29.253   5.534  24.522  0.00  0.00            
ATOM    642  HW2 HOH X 198      28.207   4.490  24.853  0.00  0.00            
ATOM    643  OW  HOH X 199      17.775  20.778  34.797  0.00  0.00            
ATOM    644  HW1 HOH X 199      17.573  21.234  35.614  0.00  0.00            
ATOM    645  HW2 HOH X 199      17.243  19.983  34.829  0.00  0.00            
ATOM    646  OW  HOH X 200      22.123  14.373  15.999  0.00  0.00            
ATOM    647  HW1 HOH X 200      22.246  14.426  15.051  0.00  0.00            
ATOM    648  HW2 HOH X 200      22.325  15.253  16.317  0.00  0.00            
ATOM    649  OW  HOH X 201      15.937   4.651   2.162  0.00  0.00            
ATOM    650  HW1 HOH X 201      16.024   4.383   3.077  0.00  0.00            
ATOM    651  HW2 HOH X 201      15.253   5.320   2.172  0.00  0.00            
ATOM    652  OW  HOH X 202       3.177   2.290  12.731  0.00  0.00            
ATOM    653  HW1 HOH X 202       2.891   2.748  11.941  0.00  0.00            
ATOM    654  HW2 HOH X 202       2.367   1.992  13.143  0.00  0.00            
ATOM    655  OW  HOH X 203       4.024  15.983  11.913  0.00  0.00            
ATOM    656  HW1 HOH X 203       4.851  15.661  11.555  0.00  0.00            
ATOM    657  HW2 HOH X 203       3.493  15.195  12.036  0.00  0.00            
ATOM    658  OW  HOH X 204      21.792  13.001  35.234  0.00  0.00            
ATOM    659  HW1 HOH X 204      21.954  13.590  35.971  0.00  0.00            
ATOM    660  HW2 HOH X 204      22.373  12.257  35.390  0.00  0.00            
ATOM    661  OW  HOH X 205      15.489   8.006  20.525  0.00  0.00            
ATOM    662  HW1 HOH X 205      15.907   7.207  20.202  0.00  0.00            
ATOM    663  HW2 HOH X 205      16.211   8.531  20.871  0.00  0.00            
ATOM    664  OW  HOH X 206      29.080  12.935  29.130  0.00  0.00            
ATOM    665  HW1 HOH X 206      28.534  12.405  28.550  0.00  0.00            
ATOM    666  HW2 HOH X 206      29.910  13.025  28.662  0.00  0.00            
ATOM    667  OW  HOH X 207      19.396  14.066  34.721  0.00  0.00            
ATOM    668  HW1 HOH X 207      19.937  14.755  34.334  0.00  0.00            
ATOM    669  HW2 HOH X 207      20.015  13.369  34.939  0.00  0.00            
ATOM    670  OW  HOH X 208      28.197   6.493   7.703  0.00  0.00            
ATOM    671  HW1 HOH X 208      27.776   6.633   8.552  0.00  0.00            
ATOM    672  HW2 HOH X 208      27.772   5.711   7.351  0.00  0.00            
ATOM    673  OW  HOH X 209       0.319  28.748  35.339  0.00  0.00            
ATOM    674  HW1 HOH X 209       0.323  28.788  36.295  0.00  0.00            
ATOM    675  HW2 HOH X 209      -0.597  28.887  35.097  0.00  0.00            
ATOM    676  OW  HOH X 210      16.143  15.129   2.745  0.00  0.00            
ATOM    677  HW1 HOH X 210      15.917  15.692   3.486  0.00  0.00            
ATOM    678  HW2 HOH X 210      17.090  15.226   2.651  0.00  0.00            
ATOM    679  OW  HOH X 211      18.044  19.105  15.547  0.00  0.00            
ATOM    680  HW1 HOH X 211      17.938  20.055  15.605  0.00  0.00            
ATOM    681  HW2 HOH X 211      18.650  18.975  14.819  0.00  0.00            
ATOM    682  OW  HOH X 212      12.894  24.895  39.151  0.00  0.00            
ATOM    683  HW1 HOH X 212      12.118  25.401  39.392  0.00  0.00            
ATOM    684  HW2 HOH X 212      13.419  24.863  39.951  0.00  0.00            
ATOM    685  OW  HOH X 213       9.357   3.000  14.527  0.00  0.00            
ATOM    686  HW1 HOH X 213       9.711   2.197  14.146  0.00  0.00            
ATOM    687  HW2 HOH X 213       8.877   3.415  13.810  0.00  0.00            
ATOM    688  OW  HOH X 214      16.396  27.527  30.533  0.00  0.00            
ATOM    689  HW1 HOH X 214      16.214  28.233  29.913  0.00  0.00            
ATOM    690  HW2 HOH X 214      16.923  27.939  31.218  0.00  0.00            
ATOM    691  OW  HOH X 215      11.319  12.139  25.487  0.00  0.00            
ATOM    692  HW1 HOH X 215      11.857  11.400  25.771  0.00  0.00            
ATOM    693  HW2 HOH X 215      11.947  12.840  25.312  0.00  0.00            
ATOM    694  OW  HOH X 216      12.722  22.569  30.514  0.00  0.00            
ATOM    695  HW1 HOH X 216      13.226  23.320  30.200  0.00  0.00            
ATOM    696  HW2 HOH X 216      13.128  21.813  30.091  0.00  0.00            
ATOM    697  OW  HOH X 217      14.817  23.410   7.745  0.00  0.00            
ATOM    698  HW1 HOH X 217      14.834  24.362   7.641  0.00  0.00            
ATOM    699  HW2 HOH X 217      14.063  23.244   8.311  0.00  0.00            
ATOM    700  OW  HOH X 218      26.648   2.032  39.872  0.00  0.00            
ATOM    701  HW1 HOH X 218      27.369   1.759  40.440  0.00  0.00            
ATOM    702  HW2 HOH X 218      26.940   1.809  38.988  0.00  0.00            
ATOM    703  OW  HOH X 219       1.416  29.093   8.435  0.00  0.00            
ATOM    704  HW1 HOH X 219       1.407  28.137   8.485  0.00  0.00            
ATOM    705  HW2 HOH X 219       2.314  29.313   8.191  0.00  0.00            
ATOM    706  OW  HOH X 220       7.979   5.694  26.708  0.00  0.00            
ATOM    707  HW1 HOH X 220       7.340   6.155  27.251  0.00  0.00            
ATOM    708  HW2 HOH X 220       8.766   5.647  27.250  0.00  0.00            
ATOM    709  OW  HOH X 221      12.429  19.986   7.116  0.00  0.00            
ATOM    710  HW1 HOH X 221      13.210  20.355   6.704  0.00  0.00            
ATOM    711  HW2 HOH X 221      12.260  19.178   6.631  0.00  0.00            
ATOM    712  OW  HOH X 222      15.888  19.177   0.581  0.00  0.00            
ATOM    713  HW1 HOH X 222      15.097  18.654   0.449  0.00  0.00            
ATOM    714  HW2 HOH X 222      16.557  18.542   0.835  0.00  0.00            
ATOM    715  OW  HOH X 223      22.708  12.794   8.265  0.00  0.00            
ATOM    716  HW1 HOH X 223      23.316  13.530   8.197  0.00  0.00            
ATOM    717  HW2 HOH X 223      21.943  13.066   7.758  0.00  0.00            
ATOM    718  OW  HOH X 224      22.425  28.973  10.839  0.00  0.00            
ATOM    719  HW1 HOH X 224      21.651  28.661  11.307  0.00  0.00            
ATOM    720  HW2 HOH X 224      22.157  29.811  10.462  0.00  0.00            
ATOM    721  OW  HOH X 225      18.199  16.009  39.910  0.00  0.00            
ATOM    722  HW1 HOH X 225      18.628  15.375  39.335  0.00  0.00            
ATOM    723  HW2 HOH X 225      17.786  15.475  40.589  0.00  0.00            
ATOM    724  OW  HOH X 226       7.085  24.701  32.427  0.00  0.00            
ATOM    725  HW1 HOH X 226       7.592  24.987  31.667  0.00  0.00            
ATOM    726  HW2 HOH X 226       6.620  25.487  32.715  0.00  0.00            
ATOM    727  OW  HOH X 227      23.613   5.883  10.975  0.00  0.00            
ATOM    728  HW1 HOH X 227      24.421   5.573  10.566  0.00  0.00            
ATOM    729  HW2 HOH X 227      23.591   5.444  11.825  0.00  0.00            
ATOM    730  OW  HOH X 228      19.217  24.468  23.910  0.00  0.00            
ATOM    731  HW1 HOH X 228      20.128  24.204  23.780  0.00  0.00            
ATOM    732  HW2 HOH X 228      19.261  25.162  24.568  0.00  0.00            
ATOM    733  OW  HOH X 229      10.889   5.589  14.468  0.00  0.00            
ATOM    734  HW1 HOH X 229      11.439   5.531  15.249  0.00  0.00            
ATOM    735  HW2 HOH X 229      10.459   4.736  14.412  0.00  0.00            
ATOM    736  OW  HOH X 230      11.467   0.800  38.294  0.00  0.00            
ATOM    737  HW1 HOH X 230      11.077  -0.046  38.073  0.00  0.00            
ATOM    738  HW2 HOH X 230      11.195   0.961  39.197  0.00  0.00            
ATOM    739  OW  HOH X 231      25.050  19.876   1.705  0.00  0.00            
ATOM    740  HW1 HOH X 231      25.772  19.249   1.666  0.00  0.00            
ATOM    741  HW2 HOH X 231      25.476  20.733   1.696  0.00  0.00            
ATOM    742  OW  HOH X 232      22.069   3.649  38.293  0.00  0.00            
ATOM    743  HW1 HOH X 232      21.752   3.583  39.194  0.00  0.00            
ATOM    744  HW2 HOH X 232      21.312   3.422  37.754  0.00  0.00            
ATOM    745  OW  HOH X 233       1.982  22.678  26.314  0.00  0.00            
ATOM    746  HW1 HOH X 233       2.253  23.055  25.476  0.00  0.00            
ATOM    747  HW2 HOH X 233       2.653  22.024  26.510  0.00  0.00            
ATOM    748  OW  HOH X 234      19.929   4.368  22.538  0.00  0.00            
ATOM    749  HW1 HOH X 234      19.394   3.579  22.628  0.00  0.00            
ATOM    750  HW2 HOH X 234      20.743   4.159  22.995  0.00  0.00            
ATOM    751  OW  HOH X 235      14.415  16.902   8.044  0.00  0.00            
ATOM    752  HW1 HOH X 235      14.738  17.009   8.938  0.00  0.00            
ATOM    753  HW2 HOH X 235      13.471  17.051   8.110  0.00  0.00            
ATOM    754  OW  HOH X 236       5.338   3.110  16.379  0.00  0.00            
ATOM    755  HW1 HOH X 236       5.619   3.354  15.497  0.00  0.00            
ATOM    756  HW2 HOH X 236       4.786   3.837  16.665  0.00  0.00            
ATOM    757  OW  HOH X 237       8.621  29.467  12.819  0.00  0.00            
ATOM    758  HW1 HOH X 237       8.191  29.668  11.988  0.00  0.00            
ATOM    759  HW2 HOH X 237       8.101  29.929  13.476  0.00  0.00            
ATOM    760  OW  HOH X 238      20.498   0.793  15.213  0.00  0.00            
ATOM    761  HW1 HOH X 238      19.804   1.413  14.992  0.00  0.00            
ATOM    762  HW2 HOH X 238      20.861   0.527  14.368  0.00  0.00            
ATOM    763  OW  HOH X 239      17.132   6.038  15.705  0.00  0.00            
ATOM    764  HW1 HOH X 239      17.792   6.119  15.018  0.00  0.00            
ATOM    765  HW2 HOH X 239      16.302   5.967  15.233  0.00  0.00            
ATOM    766  OW  HOH X 240       3.095   7.830  30.285  0.00  0.00            
ATOM    767  HW1 HOH X 240       2.869   7.050  30.793  0.00  0.00            
ATOM    768  HW2 HOH X 240       3.419   8.454  30.935  0.00  0.00            
ATOM    769  OW  HOH X 241       4.704  25.684  26.795  0.00  0.00            
ATOM    770  HW1 HOH X 241       5.033  24.788  26.865  0.00  0.00            
ATOM    771  HW2 HOH X 241       5.280  26.102  26.155  0.00  0.00            
ATOM    772  OW  HOH X 242      29.202  16.110  17.944  0.00  0.00            
ATOM    773  HW1 HOH X 242      29.489  16.695  18.645  0.00  0.00            
ATOM    774  HW2 HOH X 242      28.300  16.374  17.765  0.00  0.00            
ATOM    775  OW  HOH X 243      19.351  -0.014  39.227  0.00  0.00            
ATOM    776  HW1 HOH X 243      19.304   0.887  38.909  0.00  0.00            
ATOM    777  HW2 HOH X 243      19.204  -0.552  38.449  0.00  0.00            
ATOM    778  OW  HOH X 244      24.156  10.032  15.301  0.00  0.00            
ATOM    779  HW1 HOH X 244      24.573  10.198  16.147  0.00  0.00            
ATOM    780  HW2 HOH X 244      23.498   9.362  15.486  0.00  0.00            
ATOM    781  OW  HOH X 245      29.453  23.782  36.804  0.00  0.00            
ATOM    782  HW1 HOH X 245      29.096  23.459  35.977  0.00  0.00            
ATOM    783  HW2 HOH X 245      28.745  24.303  37.184  0.00  0.00            
ATOM    784  OW  HOH X 246      18.028   2.768  18.725  0.00  0.00            
ATOM    785  HW1 HOH X 246      17.429   2.687  19.467  0.00  0.00            
ATOM    786  HW2 HOH X 246      18.675   2.075  18.862  0.00  0.00            
ATOM    787  OW  HOH X 247       3.956   5.167  39.219  0.00  0.00            
ATOM    788  HW1 HOH X 247       3.791   4.227  39.284  0.00  0.00            
ATOM    789  HW2 HOH X 247       4.634   5.246  38.548  0.00  0.00            
ATOM    790  OW  HOH X 248      22.312  20.104  28.867  0.00  0.00            
ATOM    791  HW1 HOH X 248      21.886  19.697  28.112  0.00  0.00            
ATOM    792  HW2 HOH X 248      21.638  20.667  29.248  0.00  0.00            
ATOM    793  OW  HOH X 249      25.779   0.879  25.848  0.00  0.00            
ATOM    794  HW1 HOH X 249      26.344   0.608  26.573  0.00  0.00            
ATOM    795  HW2 HOH X 249      25.016   1.272  26.272  0.00  0.00            
ATOM    796  OW  HOH X 250      18.426  18.979  29.594  0.00  0.00            
ATOM    797  HW1 HOH X 250      18.769  18.570  30.388  0.00  0.00            
ATOM    798  HW2 HOH X 250      18.749  18.428  28.881  0.00  0.00            
ATOM    799  OW  HOH X 251      22.978  25.027  19.058  0.00  0.00            
ATOM    800  HW1 HOH X 251      23.654  24.477  18.663  0.00  0.00            
ATOM    801  HW2 HOH X 251      22.884  25.764  18.454  0.00  0.00            
ATOM    802  OW  HOH X 252      20.408  10.349  18.140  0.00  0.00            
ATOM    803  HW1 HOH X 252      20.244  11.273  17.950  0.00  0.00            
ATOM    804  HW2 HOH X 252      21.045  10.360  18.854  0.00  0.00            
ATOM    805  OW  HOH X 253      14.532   1.498  34.515  0.00  0.00            
ATOM    806  HW1 HOH X 253      13.631   1.761  34.328  0.00  0.00            
ATOM    807  HW2 HOH X 253      14.453   0.843  35.208  0.00  0.00            
ATOM    808  OW  HOH X 254      26.732  20.848  16.463  0.00  0.00            
ATOM    809  HW1 HOH X 254      27.150  21.271  17.214  0.00  0.00            
ATOM    810  HW2 HOH X 254      26.413  20.013  16.805  0.00  0.00            
ATOM    811  OW  HOH X 255      13.912  29.445  20.448  0.00  0.00            
ATOM    812  HW1 HOH X 255      14.602  29.085  21.005  0.00  0.00            
ATOM    813  HW2 HOH X 255      14.120  29.124  19.571  0.00  0.00            
ATOM    814  OW  HOH X 256      26.538  19.741  19.283  0.00  0.00            
ATOM    815  HW1 HOH X 256      27.455  19.989  19.162  0.00  0.00            
ATOM    816  HW2 HOH X 256      26.436  19.659  20.231  0.00  0.00            
ATOM    817  OW  HOH X 257      22.175   9.906  30.262  0.00  0.00            
ATOM    818  HW1 HOH X 257      21.233   9.754  30.331  0.00  0.00            
ATOM    819  HW2 HOH X 257      22.458   9.341  29.543  0.00  0.00            
ATOM    820  OW  HOH X 258      17.628  10.003  21.180  0.00  0.00            
ATOM    821  HW1 HOH X 258      17.768  10.682  21.840  0.00  0.00            
ATOM    822  HW2 HOH X 258      17.113  10.434  20.498  0.00  0.00            
ATOM    823  OW  HOH X 259      -0.169  12.090   1.782  0.00  0.00            
ATOM    824  HW1 HOH X 259       0.060  11.675   2.614  0.00  0.00            
ATOM    825  HW2 HOH X 259       0.390  12.866   1.738  0.00  0.00            
ATOM    826  OW  HOH X 260       1.026  19.936  29.285  0.00  0.00            
ATOM    827  HW1 HOH X 260       0.901  20.852  29.040  0.00  0.00            
ATOM    828  HW2 HOH X 260       1.936  19.748  29.058  0.00  0.00            
ATOM    829  OW  HOH X 261       9.506  15.925  27.493  0.00  0.00            
ATOM    830  HW1 HOH X 261       9.392  15.013  27.225  0.00  0.00            
ATOM    831  HW2 HOH X 261      10.251  15.908  28.093  0.00  0.00            
ATOM    832  OW  HOH X 262      28.247  27.788  27.283  0.00  0.00            
ATOM    833  HW1 HOH X 262      27.781  28.621  27.212  0.00  0.00            
ATOM    834  HW2 HOH X 262      28.571  27.770  28.184  0.00  0.00            
ATOM    835  OW  HOH X 263       1.360   0.493  32.876  0.00  0.00            
ATOM    836  HW1 HOH X 263       2.139   0.875  33.281  0.00  0.00            
ATOM    837  HW2 HOH X 263       1.248  -0.348  33.317  0.00  0.00            
ATOM    838  OW  HOH X 264      12.018   5.901  35.517  0.00  0.00            
ATOM    839  HW1 HOH X 264      12.299   5.456  34.718  0.00  0.00            
ATOM    840  HW2 HOH X 264      11.084   6.064  35.386  0.00  0.00            
ATOM    841  OW  HOH X 265      21.876   3.220   4.263  0.00  0.00            
ATOM    842  HW1 HOH X 265      21.384   4.036   4.175  0.00  0.00            
ATOM    843  HW2 HOH X 265      21.414   2.599   3.700  0.00  0.00            
ATOM    844  OW  HOH X 266       1.643  13.182   9.178  0.00  0.00            
ATOM    845  HW1 HOH X 266       2.018  13.004  10.041  0.00  0.00            
ATOM    846  HW2 HOH X 266       0.706  13.016   9.285  0.00  0.00            
ATOM    847  OW  HOH X 267      19.463  17.367  27.396  0.00  0.00            
ATOM    848  HW1 HOH X 267      18.866  16.755  26.966  0.00  0.00            
ATOM    849  HW2 HOH X 267      19.880  17.841  26.677  0.00  0.00            
ATOM    850  OW  HOH X 268       8.756  14.312  31.271  0.00  0.00            
ATOM    851  HW1 HOH X 268       9.129  13.677  31.883  0.00  0.00            
ATOM    852  HW2 HOH X 268       8.138  14.818  31.798  0.00  0.00            
ATOM    853  OW  HOH X 269       6.443   6.891  31.320  0.00  0.00            
ATOM    854  HW1 HOH X 269       6.612   7.195  30.429  0.00  0.00            
ATOM    855  HW2 HOH X 269       5.545   6.559  31.294  0.00  0.00            
ATOM    856  OW  HOH X 270       1.886   3.200  10.378  0.00  0.00            
ATOM    857  HW1 HOH X 270       1.349   3.861   9.941  0.00  0.00            
ATOM    858  HW2 HOH X 270       1.411   2.380  10.247  0.00  0.00            
ATOM    859  OW  HOH X 271      22.477  18.593  14.252  0.00  0.00            
ATOM    860  HW1 HOH X 271      22.985  19.403  14.291  0.00  0.00            
ATOM    861  HW2 HOH X 271      22.797  18.147  13.468  0.00  0.00            
ATOM    862  OW  HOH X 272       5.711   5.344  34.297  0.00  0.00            
ATOM    863  HW1 HOH X 272       6.568   4.934  34.412  0.00  0.00            
ATOM    864  HW2 HOH X 272       5.298   4.843  33.593  0.00  0.00            
ATOM    865  OW  HOH X 273      16.504  18.908   4.484  0.00  0.00            
ATOM    866  HW1 HOH X 273      16.519  18.372   3.691  0.00  0.00            
ATOM    867  HW2 HOH X 273      16.451  18.275   5.200  0.00  0.00            
ATOM    868  OW  HOH X 274      24.981  24.738   0.125  0.00  0.00            
ATOM    869  HW1 HOH X 274      24.674  23.979   0.621  0.00  0.00            
ATOM    870  HW2 HOH X 274      24.282  25.385   0.219  0.00  0.00            
ATOM    871  OW  HOH X 275       3.420  17.930  13.634  0.00  0.00            
ATOM    872  HW1 HOH X 275       3.301  17.645  14.540  0.00  0.00            
ATOM    873  HW2 HOH X 275       3.473  17.117  13.132  0.00  0.00            
ATOM    874  OW  HOH X 276      18.358  15.279  16.825  0.00  0.00            
ATOM    875  HW1 HOH X 276      18.706  14.763  16.098  0.00  0.00            
ATOM    876  HW2 HOH X 276      17.663  15.808  16.433  0.00  0.00            
ATOM    877  OW  HOH X 277      24.998   6.611  35.703  0.00  0.00            
ATOM    878  HW1 HOH X 277      24.840   6.888  36.605  0.00  0.00            
ATOM    879  HW2 HOH X 277      24.731   5.692  35.684  0.00  0.00            
ATOM    880  OW  HOH X 278      25.446  14.900  17.748  0.00  0.00            
ATOM    881  HW1 HOH X 278      26.005  15.672  17.659  0.00  0.00            
ATOM    882  HW2 HOH X 278      25.948  14.192  17.344  0.00  0.00            
ATOM    883  OW  HOH X 279      12.834  22.106  24.060  0.00  0.00            
ATOM    884  HW1 HOH X 279      12.692  22.191  25.003  0.00  0.00            
ATOM    885  HW2 HOH X 279      13.495  21.419  23.978  0.00  0.00            
ATOM    886  OW  HOH X 280      14.774  19.388  35.768  0.00  0.00            
ATOM    887  HW1 HOH X 280      13.901  19.446  35.380  0.00  0.00            
ATOM    888  HW2 HOH X 280      15.371  19.400  35.020  0.00  0.00            
ATOM    889  OW  HOH X 281      18.965  16.487   7.740  0.00  0.00            
ATOM    890  HW1 HOH X 281      19.663  17.140   7.792  0.00  0.00            
ATOM    891  HW2 HOH X 281      19.105  15.926   8.504  0.00  0.00            
ATOM    892  OW  HOH X 282      15.168   7.065   0.482  0.00  0.00            
ATOM    893  HW1 HOH X 282      15.047   6.150   0.228  0.00  0.00            
ATOM    894  HW2 HOH X 282      15.994   7.321   0.071  0.00  0.00            
ATOM    895  OW  HOH X 283      27.297  22.170   6.275  0.00  0.00            
ATOM    896  HW1 HOH X 283      27.868  21.487   5.924  0.00  0.00            
ATOM    897  HW2 HOH X 283      27.895  22.865   6.552  0.00  0.00            
ATOM    898  OW  HOH X 284       0.303   0.936  10.037  0.00  0.00            
ATOM    899  HW1 HOH X 284       0.570   0.253   9.421  0.00  0.00            
ATOM    900  HW2 HOH X 284      -0.640   0.810  10.140  0.00  0.00            
ATOM    901  OW  HOH X 285      10.944  23.247   1.331  0.00  0.00            
ATOM    902  HW1 HOH X 285      11.582  23.931   1.129  0.00  0.00            
ATOM    903  HW2 HOH X 285      11.302  22.804   2.101  0.00  0.00            
ATOM    904  OW  HOH X 286       4.279  17.594  31.166  0.00  0.00            
ATOM    905  HW1 HOH X 286       3.854  17.968  31.938  0.00  0.00            
ATOM    906  HW2 HOH X 286       5.146  17.329  31.475  0.00  0.00            
ATOM    907  OW  HOH X 287      22.680  11.635  13.660  0.00  0.00            
ATOM    908  HW1 HOH X 287      23.173  11.376  14.437  0.00  0.00            
ATOM    909  HW2 HOH X 287      23.132  12.415  13.337  0.00  0.00            
ATOM    910  OW  HOH X 288      28.401  26.387  10.124  0.00  0.00            
ATOM    911  HW1 HOH X 288      29.329  26.382   9.888  0.00  0.00            
ATOM    912  HW2 HOH X 288      28.343  27.002  10.855  0.00  0.00            
ATOM    913  OW  HOH X 289      15.224  16.996  37.200  0.00  0.00            
ATOM    914  HW1 HOH X 289      15.234  17.821  36.715  0.00  0.00            
ATOM    915  HW2 HOH X 289      14.398  16.581  36.951  0.00  0.00            
ATOM    916  OW  HOH X 290      15.650  10.244  34.208  0.00  0.00            
ATOM    917  HW1 HOH X 290      14.870  10.641  34.595  0.00  0.00            
ATOM    918  HW2 HOH X 290      15.530  10.350  33.264  0.00  0.00            
ATOM    919  OW  HOH X 291      18.148  17.748  37.214  0.00  0.00            
ATOM    920  HW1 HOH X 291      17.195  17.737  37.309  0.00  0.00            
ATOM    921  HW2 HOH X 291      18.472  18.000  38.079  0.00  0.00            
ATOM    922  OW  HOH X 292       2.749   3.308  29.464  0.00  0.00            
ATOM    923  HW1 HOH X 292       2.281   4.088  29.761  0.00  0.00            
ATOM    924  HW2 HOH X 292       2.079   2.625  29.429  0.00  0.00            
ATOM    925  OW  HOH X 293      16.022   9.848   5.823  0.00  0.00            
ATOM    926  HW1 HOH X 293      16.105   9.937   6.772  0.00  0.00            
ATOM    927  HW2 HOH X 293      16.348  10.679   5.475  0.00  0.00            
ATOM    928  OW  HOH X 294      29.966  15.300  33.004  0.00  0.00            
ATOM    929  HW1 HOH X 294      29.452  14.577  32.645  0.00  0.00            
ATOM    930  HW2 HOH X 294      29.314  15.931  33.307  0.00  0.00            
ATOM    931  OW  HOH X 295      16.533  15.734  33.892  0.00  0.00            
ATOM    932  HW1 HOH X 295      16.731  15.240  34.688  0.00  0.00            
ATOM    933  HW2 HOH X 295      15.653  15.450  33.645  0.00  0.00            
ATOM    934  OW  HOH X 296      12.504  29.642  15.399  0.00  0.00            
ATOM    935  HW1 HOH X 296      12.349  28.698  15.408  0.00  0.00            
ATOM    936  HW2 HOH X 296      13.393  29.736  15.057  0.00  0.00            
ATOM    937  OW  HOH X 297      11.280   9.725  39.166  0.00  0.00            
ATOM    938  HW1 HOH X 297      11.676   9.786  38.297  0.00  0.00            
ATOM    939  HW2 HOH X 297      10.369   9.482  38.998  0.00  0.00            
ATOM    940  OW  HOH X 298      14.667  10.083  37.622  0.00  0.00            
ATOM    941  HW1 HOH X 298      14.562  10.009  38.570  0.00  0.00            
ATOM    942  HW2 HOH X 298      15.566  10.390  37.504  0.00  0.00            
ATOM    943  OW  HOH X 299      13.825  19.598  20.272  0.00  0.00            
ATOM    944  HW1 HOH X 299      14.006  19.678  19.336  0.00  0.00            
ATOM    945  HW2 HOH X 299      14.583  19.998  20.698  0.00  0.00            
ATOM    946  OW  HOH X 300       2.034   2.740   5.435  0.00  0.00            
ATOM    947  HW1 HOH X 300       2.372   1.941   5.839  0.00  0.00            
ATOM    948  HW2 HOH X 300       1.131   2.803   5.746  0.00  0.00            
ATOM    949  OW  HOH X 301      28.681  11.447  26.823  0.00  0.00            
ATOM    950  HW1 HOH X 301      27.799  11.315  26.474  0.00  0.00            
ATOM    951  HW2 HOH X 301      29.060  10.568  26.855  0.00  0.00            
ATOM    952  OW  HOH X 302      24.836   6.343  14.882  0.00  0.00            
ATOM    953  HW1 HOH X 302      25.158   6.496  15.770  0.00  0.00            
ATOM    954  HW2 HOH X 302      23.917   6.611  14.910  0.00  0.00            
ATOM    955  OW  HOH X 303      15.880  22.184  17.782  0.00  0.00            
ATOM    956  HW1 HOH X 303      16.408  22.912  18.111  0.00  0.00            
ATOM    957  HW2 HOH X 303      15.911  21.530  18.480  0.00  0.00            
ATOM    958  OW  HOH X 304       2.002   5.216  22.680  0.00  0.00            
ATOM    959  HW1 HOH X 304       1.167   5.530  22.334  0.00  0.00            
ATOM    960  HW2 HOH X 304       2.369   5.969  23.144  0.00  0.00            
ATOM    961  OW  HOH X 305      20.472  12.916  17.413  0.00  0.00            
ATOM    962  HW1 HOH X 305      19.827  13.504  17.020  0.00  0.00            
ATOM    963  HW2 HOH X 305      21.218  12.945  16.815  0.00  0.00            
ATOM    964  OW  HOH X 306      15.958  12.685   9.673  0.00  0.00            
ATOM    965  HW1 HOH X 306      15.858  11.780   9.378  0.00  0.00            
ATOM    966  HW2 HOH X 306      16.697  12.659  10.281  0.00  0.00            
ATOM    967  OW  HOH X 307      14.595  14.482  16.832  0.00  0.00            
ATOM    968  HW1 HOH X 307      14.986  15.127  17.422  0.00  0.00            
ATOM    969  HW2 HOH X 307      14.543  14.929  15.988  0.00  0.00            
ATOM    970  OW  HOH X 308      12.452  22.943  11.781  0.00  0.00            
ATOM    971  HW1 HOH X 308      12.412  22.683  10.861  0.00  0.00            
ATOM    972  HW2 HOH X 308      13.034  23.703  11.791  0.00  0.00            
ATOM    973  OW  HOH X 309      17.715  24.849  17.877  0.00  0.00            
ATOM    974  HW1 HOH X 309      17.761  25.751  18.196  0.00  0.00            
ATOM    975  HW2 HOH X 309      16.835  24.769  17.509  0.00  0.00            
ATOM    976  OW  HOH X 310       7.129  17.639  16.407  0.00  0.00            
ATOM    977  HW1 HOH X 310       7.339  18.364  16.994  0.00  0.00            
ATOM    978  HW2 HOH X 310       7.153  18.024  15.531  0.00  0.00            
ATOM    979  OW  HOH X 311      17.820  18.873   9.757  0.00  0.00            
ATOM    980  HW1 HOH X 311      17.252  18.362  10.334  0.00  0.00            
ATOM    981  HW2 HOH X 311      18.662  18.420   9.787  0.00  0.00            
ATOM    982  OW  HOH X 312      18.592   0.687   7.559  0.00  0.00            
ATOM    983  HW1 HOH X 312      19.486   0.345   7.561  0.00  0.00            
ATOM    984  HW2 HOH X 312      18.683   1.594   7.269  0.00  0.00            
ATOM    985  OW  HOH X 313      30.121  23.096  10.539  0.00  0.00            
ATOM    986  HW1 HOH X 313      29.662  23.902  10.775  0.00  0.00            
ATOM    987  HW2 HOH X 313      29.597  22.397  10.930  0.00  0.00            
ATOM    988  OW  HOH X 314      23.025  26.459   6.674  0.00  0.00            
ATOM    989  HW1 HOH X 314      23.140  25.702   7.248  0.00  0.00            
ATOM    990  HW2 HOH X 314      22.122  26.738   6.822  0.00  0.00            
ATOM    991  OW  HOH X 315       8.634  12.889  17.907  0.00  0.00            
ATOM    992  HW1 HOH X 315       8.621  12.338  18.690  0.00  0.00            
ATOM    993  HW2 HOH X 315       8.053  13.620  18.117  0.00  0.00            
ATOM    994  OW  HOH X 316      15.399  24.262  22.190  0.00  0.00            
ATOM    995  HW1 HOH X 316      14.764  24.033  21.511  0.00  0.00            
ATOM    996  HW2 HOH X 316      14.886  24.294  22.997  0.00  0.00            
ATOM    997  OW  HOH X 317       2.874  24.831  38.500  0.00  0.00            
ATOM    998  HW1 HOH X 317       1.970  25.141  38.555  0.00  0.00            
ATOM    999  HW2 HOH X 317       2.803  23.942  38.151  0.00  0.00            
ATOM   1000  OW  HOH X 318      25.993   5.478   5.406  0.00  0.00            
ATOM   1001  HW1 HOH X 318      25.275   5.358   6.029  0.00  0.00            
ATOM   1002  HW2 HOH X 318      25.788   4.882   4.686  0.00  0.00            
ATOM   1003  OW  HOH X 319      26.146  11.177  33.184  0.00  0.00            
ATOM   1004  HW1 HOH X 319      25.512  11.632  32.630  0.00  0.00            
ATOM   1005  HW2 HOH X 319      25.905  10.253  33.118  0.00  0.00            
ATOM   1006  OW  HOH X 320      24.591  11.391   5.613  0.00  0.00            
ATOM   1007  HW1 HOH X 320      24.734  12.326   5.464  0.00  0.00            
ATOM   1008  HW2 HOH X 320      23.771  11.349   6.105  0.00  0.00            
ATOM   1009  OW  HOH X 321      21.016   0.909  27.203  0.00  0.00            
ATOM   1010  HW1 HOH X 321      20.860   0.688  26.285  0.00  0.00            
ATOM   1011  HW2 HOH X 321      20.216   0.639  27.654  0.00  0.00            
ATOM   1012  OW  HOH X 322      12.880   4.749  33.169  0.00  0.00            
ATOM   1013  HW1 HOH X 322      12.623   3.996  32.636  0.00  0.00            
ATOM   1014  HW2 HOH X 322      13.276   5.359  32.546  0.00  0.00            
ATOM   1015  OW  HOH X 323      13.237   4.452  10.991  0.00  0.00            
ATOM   1016  HW1 HOH X 323      12.826   5.308  11.108  0.00  0.00            
ATOM   1017  HW2 HOH X 323      13.501   4.436  10.071  0.00  0.00            
ATOM   1018  OW  HOH X 324       7.706  15.592  18.247  0.00  0.00            
ATOM   1019  HW1 HOH X 324       7.497  16.131  17.484  0.00  0.00            
ATOM   1020  HW2 HOH X 324       7.100  15.891  18.925  0.00  0.00            
ATOM   1021  OW  HOH X 325      25.753  16.681   8.557  0.00  0.00            
ATOM   1022  HW1 HOH X 325      25.756  17.483   9.080  0.00  0.00            
ATOM   1023  HW2 HOH X 325      26.572  16.714   8.063  0.00  0.00            
ATOM   1024  OW  HOH X 326      16.770   2.574  35.884  0.00  0.00            
ATOM   1025  HW1 HOH X 326      15.956   2.225  35.522  0.00  0.00            
ATOM   1026  HW2 HOH X 326      17.333   2.710  35.122  0.00  0.00            
ATOM   1027  OW  HOH X 327      21.250  23.952  20.873  0.00  0.00            
ATOM   1028  HW1 HOH X 327      20.924  23.151  20.461  0.00  0.00            
ATOM   1029  HW2 HOH X 327      21.910  24.284  20.264  0.00  0.00            
ATOM   1030  OW  HOH X 328      26.679  27.033  23.102  0.00  0.00            
ATOM   1031  HW1 HOH X 328      26.030  26.335  23.016  0.00  0.00            
ATOM   1032  HW2 HOH X 328      26.214  27.739  23.550  0.00  0.00            
ATOM   1033  OW  HOH X 329       1.575   0.615  29.799  0.00  0.00            
ATOM   1034  HW1 HOH X 329       1.324   0.374  30.691  0.00  0.00            
ATOM   1035  HW2 HOH X 329       1.809  -0.215  29.383  0.00  0.00            
ATOM   1036  OW  HOH X 330      21.929  15.753   0.792  0.00  0.00            
ATOM   1037  HW1 HOH X 330      21.625  15.422  -0.053  0.00  0.00            
ATOM   1038  HW2 HOH X 330      21.133  15.838   1.317  0.00  0.00            
ATOM   1039  OW  HOH X 331      20.910  18.542  25.437  0.00  0.00            
ATOM   1040  HW1 HOH X 331      21.128  18.251  24.552  0.00  0.00            
ATOM   1041  HW2 HOH X 331      21.704  18.378  25.946  0.00  0.00            
ATOM   1042  OW  HOH X 332      18.095  11.258  11.422  0.00  0.00            
ATOM   1043  HW1 HOH X 332      18.255  10.314  11.451  0.00  0.00            
ATOM   1044  HW2 HOH X 332      18.212  11.549  12.327  0.00  0.00            
ATOM   1045  OW  HOH X 333      26.764  17.297  17.750  0.00  0.00            
ATOM   1046  HW1 HOH X 333      26.825  17.876  18.510  0.00  0.00            
ATOM   1047  HW2 HOH X 333      26.109  17.709  17.187  0.00  0.00            
ATOM   1048  OW  HOH X 334       2.673  26.171  23.888  0.00  0.00            
ATOM   1049  HW1 HOH X 334       2.505  25.228  23.912  0.00  0.00            
ATOM   1050  HW2 HOH X 334       3.552  26.267  24.253  0.00  0.00            
ATOM   1051  OW  HOH X 335       6.877   3.272  28.998  0.00  0.00            
ATOM   1052  HW1 HOH X 335       6.400   4.097  28.902  0.00  0.00            
ATOM   1053  HW2 HOH X 335       6.740   3.021  29.911  0.00  0.00            
ATOM   1054  OW  HOH X 336      24.142  27.774   2.785  0.00  0.00            
ATOM   1055  HW1 HOH X 336      23.822  27.209   2.082  0.00  0.00            
ATOM   1056  HW2 HOH X 336      23.885  27.324   3.590  0.00  0.00            
ATOM   1057  OW  HOH X 337       8.650  18.042  28.929  0.00  0.00            
ATOM   1058  HW1 HOH X 337       9.121  17.351  28.463  0.00  0.00            
ATOM   1059  HW2 HOH X 337       8.594  17.727  29.832  0.00  0.00            
ATOM   1060  OW  HOH X 338      27.760  24.739  39.889  0.00  0.00            
ATOM   1061  HW1 HOH X 338      26.816  24.756  39.734  0.00  0.00            
ATOM   1062  HW2 HOH X 338      27.956  25.593  40.276  0.00  0.00            
ATOM   1063  OW  HOH X 339       2.091   9.110   7.497  0.00  0.00            
ATOM   1064  HW1 HOH X 339       1.275   8.738   7.163  0.00  0.00            
ATOM   1065  HW2 HOH X 339       2.774   8.527   7.166  0.00  0.00            
ATOM   1066  OW  HOH X 340      11.713  12.847  30.636  0.00  0.00            
ATOM   1067  HW1 HOH X 340      11.154  13.005  31.397  0.00  0.00            
ATOM   1068  HW2 HOH X 340      11.706  11.896  30.527  0.00  0.00            
ATOM   1069  OW  HOH X 341       1.967  23.199   8.509  0.00  0.00            
ATOM   1070  HW1 HOH X 341       1.250  23.172   9.142  0.00  0.00            
ATOM   1071  HW2 HOH X 341       1.603  22.800   7.718  0.00  0.00            
ATOM   1072  OW  HOH X 342      11.655   6.406  11.923  0.00  0.00            
ATOM   1073  HW1 HOH X 342      11.349   7.271  11.651  0.00  0.00            
ATOM   1074  HW2 HOH X 342      11.333   6.309  12.819  0.00  0.00            
ATOM   1075  OW  HOH X 343       3.936   3.546  33.156  0.00  0.00            
ATOM   1076  HW1 HOH X 343       3.339   4.131  32.689  0.00  0.00            
ATOM   1077  HW2 HOH X 343       3.464   3.311  33.955  0.00  0.00            
ATOM   1078  OW  HOH X 344      27.979  12.596  16.624  0.00  0.00            
ATOM   1079  HW1 HOH X 344      28.825  12.988  16.410  0.00  0.00            
ATOM   1080  HW2 HOH X 344      27.834  12.824  17.543  0.00  0.00            
ATOM   1081  OW  HOH X 345      15.661   2.025  19.939  0.00  0.00            
ATOM   1082  HW1 HOH X 345      15.393   1.110  20.031  0.00  0.00            
ATOM   1083  HW2 HOH X 345      15.577   2.389  20.820  0.00  0.00            
ATOM   1084  OW  HOH X 346      21.601  23.888   5.990  0.00  0.00            
ATOM   1085  HW1 HOH X 346      20.960  23.237   6.276  0.00  0.00            
ATOM   1086  HW2 HOH X 346      22.124  24.069   6.771  0.00  0.00            
ATOM   1087  OW  HOH X 347      16.698  10.983  16.252  0.00  0.00            
ATOM   1088  HW1 HOH X 347      16.084  10.249  16.230  0.00  0.00            
ATOM   1089  HW2 HOH X 347      17.484  10.652  15.817  0.00  0.00            
ATOM   1090  OW  HOH X 348      12.720  12.182  16.383  0.00  0.00            
ATOM   1091  HW1 HOH X 348      13.316  12.930  16.379  0.00  0.00            
ATOM   1092  HW2 HOH X 348      11.948  12.493  16.856  0.00  0.00            
ATOM   1093  OW  HOH X 349      16.724   6.198  19.171  0.00  0.00            
ATOM   1094  HW1 HOH X 349      17.464   6.470  18.628  0.00  0.00            
ATOM   1095  HW2 HOH X 349      16.046   5.945  18.545  0.00  0.00            
ATOM   1096  OW  HOH X 350      10.067   8.508  12.901  0.00  0.00            
ATOM   1097  HW1 HOH X 350       9.322   9.105  12.961  0.00  0.00            
ATOM   1098  HW2 HOH X 350      10.473   8.544  13.766  0.00  0.00            
ATOM   1099  OW  HOH X 351      16.037   7.096  33.751  0.00  0.00            
ATOM   1100  HW1 HOH X 351      16.083   6.376  34.380  0.00  0.00            
ATOM   1101  HW2 HOH X 351      15.174   7.484  33.894  0.00  0.00            
ATOM   1102  OW  HOH X 352       5.958   2.868  36.228  0.00  0.00            
ATOM   1103  HW1 HOH X 352       6.284   3.359  36.982  0.00  0.00            
ATOM   1104  HW2 HOH X 352       5.110   3.266  36.030  0.00  0.00            
ATOM   1105  OW  HOH X 353      12.979  13.159  28.038  0.00  0.00            
ATOM   1106  HW1 HOH X 353      12.751  12.658  28.822  0.00  0.00            
ATOM   1107  HW2 HOH X 353      12.885  12.534  27.319  0.00  0.00            
ATOM   1108  OW  HOH X 354       8.814  17.421  25.434  0.00  0.00            
ATOM   1109  HW1 HOH X 354       8.560  16.930  24.653  0.00  0.00            
ATOM   1110  HW2 HOH X 354       8.957  16.750  26.103  0.00  0.00            
ATOM   1111  OW  HOH X 355      15.730  26.339   8.021  0.00  0.00            
ATOM   1112  HW1 HOH X 355      16.419  26.629   7.423  0.00  0.00            
ATOM   1113  HW2 HOH X 355      14.921  26.679   7.638  0.00  0.00            
ATOM   1114  OW  HOH X 356       6.280  21.510  17.078  0.00  0.00            
ATOM   1115  HW1 HOH X 356       5.638  21.040  16.547  0.00  0.00            
ATOM   1116  HW2 HOH X 356       6.949  20.856  17.282  0.00  0.00            
ATOM   1117  OW  HOH X 357       1.711  19.926  37.261  0.00  0.00            
ATOM   1118  HW1 HOH X 357       1.916  19.931  38.196  0.00  0.00            
ATOM   1119  HW2 HOH X 357       2.077  19.103  36.939  0.00  0.00            
ATOM   1120  OW  HOH X 358       5.592  15.972  24.932  0.00  0.00            
ATOM   1121  HW1 HOH X 358       5.552  16.396  25.789  0.00  0.00            
ATOM   1122  HW2 HOH X 358       6.499  16.091  24.648  0.00  0.00            
ATOM   1123  OW  HOH X 359       6.312   7.207   0.307  0.00  0.00            
ATOM   1124  HW1 HOH X 359       6.033   7.279  -0.606  0.00  0.00            
ATOM   1125  HW2 HOH X 359       5.502   7.055   0.794  0.00  0.00            
ATOM   1126  OW  HOH X 360      19.201  27.890  28.880  0.00  0.00            
ATOM   1127  HW1 HOH X 360      18.605  28.228  28.211  0.00  0.00            
ATOM   1128  HW2 HOH X 360      19.558  28.672  29.300  0.00  0.00            
ATOM   1129  OW  HOH X 361      18.513  27.204   9.107  0.00  0.00            
ATOM   1130  HW1 HOH X 361      18.247  27.913   9.693  0.00  0.00            
ATOM   1131  HW2 HOH X 361      18.251  27.503   8.236  0.00  0.00            
ATOM   1132  OW  HOH X 362      13.499  21.448  16.505  0.00  0.00            
ATOM   1133  HW1 HOH X 362      14.392  21.590  16.821  0.00  0.00            
ATOM   1134  HW2 HOH X 362      13.605  20.918  15.715  0.00  0.00            
ATOM   1135  OW  HOH X 363      16.266  27.796  21.442  0.00  0.00            
ATOM   1136  HW1 HOH X 363      15.445  27.691  21.923  0.00  0.00            
ATOM   1137  HW2 HOH X 363      16.641  26.916  21.414  0.00  0.00            
ATOM   1138  OW  HOH X 364      17.322  12.284   6.155  0.00  0.00            
ATOM   1139  HW1 HOH X 364      16.907  12.600   5.352  0.00  0.00            
ATOM   1140  HW2 HOH X 364      16.907  12.789   6.855  0.00  0.00            
ATOM   1141  OW  HOH X 365      26.886  26.314   7.881  0.00  0.00            
ATOM   1142  HW1 HOH X 365      25.973  26.518   8.083  0.00  0.00            
ATOM   1143  HW2 HOH X 365      27.329  26.328   8.729  0.00  0.00            
ATOM   1144  OW  HOH X 366      12.731  16.424  36.144  0.00  0.00            
ATOM   1145  HW1 HOH X 366      12.438  16.946  36.891  0.00  0.00            
ATOM   1146  HW2 HOH X 366      12.909  17.068  35.458  0.00  0.00            
ATOM   1147  OW  HOH X 367      11.465  22.033  32.792  0.00  0.00            
ATOM   1148  HW1 HOH X 367      11.923  22.258  31.982  0.00  0.00            
ATOM   1149  HW2 HOH X 367      10.536  22.078  32.562  0.00  0.00            
ATOM   1150  OW  HOH X 368      22.853   2.303   6.876  0.00  0.00            
ATOM   1151  HW1 HOH X 368      22.313   1.520   6.986  0.00  0.00            
ATOM   1152  HW2 HOH X 368      22.674   2.595   5.982  0.00  0.00            
ATOM   1153  OW  HOH X 369       0.176   2.762  16.225  0.00  0.00            
ATOM   1154  HW1 HOH X 369      -0.558   2.266  16.588  0.00  0.00            
ATOM   1155  HW2 HOH X 369       0.793   2.844  16.952  0.00  0.00            
ATOM   1156  OW  HOH X 370       5.017  20.609   1.388  0.00  0.00            
ATOM   1157  HW1 HOH X 370       5.915  20.682   1.711  0.00  0.00            
ATOM   1158  HW2 HOH X 370       4.483  20.522   2.178  0.00  0.00            
ATOM   1159  OW  HOH X 371       4.727   7.379   3.770  0.00  0.00            
ATOM   1160  HW1 HOH X 371       5.652   7.603   3.671  0.00  0.00            
ATOM   1161  HW2 HOH X 371       4.667   6.470   3.476  0.00  0.00            
ATOM   1162  OW  HOH X 372      22.064   4.186  28.199  0.00  0.00            
ATOM   1163  HW1 HOH X 372      22.112   3.239  28.069  0.00  0.00            
ATOM   1164  HW2 HOH X 372      22.309   4.557  27.352  0.00  0.00            
ATOM   1165  OW  HOH X 373      24.272  28.789  17.857  0.00  0.00            
ATOM   1166  HW1 HOH X 373      23.865  29.307  17.163  0.00  0.00            
ATOM   1167  HW2 HOH X 373      23.627  28.786  18.564  0.00  0.00            
ATOM   1168  OW  HOH X 374       4.651  22.564  19.017  0.00  0.00            
ATOM   1169  HW1 HOH X 374       5.377  23.108  19.322  0.00  0.00            
ATOM   1170  HW2 HOH X 374       4.956  22.199  18.186  0.00  0.00            
ATOM   1171  OW  HOH X 375       9.081  16.037  34.692  0.00  0.00            
ATOM   1172  HW1 HOH X 375       9.137  16.801  35.266  0.00  0.00            
ATOM   1173  HW2 HOH X 375       8.262  15.608  34.941  0.00  0.00            
ATOM   1174  OW  HOH X 376      25.503  10.629  17.754  0.00  0.00            
ATOM   1175  HW1 HOH X 376      25.699  11.463  18.180  0.00  0.00            
ATOM   1176  HW2 HOH X 376      25.199  10.062  18.463  0.00  0.00            
ATOM   1177  OW  HOH X 377      13.007  23.462  21.052  0.00  0.00            
ATOM   1178  HW1 HOH X 377      12.176  23.659  21.484  0.00  0.00            
ATOM   1179  HW2 HOH X 377      12.762  22.940  20.288  0.00  0.00            
ATOM   1180  OW  HOH X 378      13.260   3.626  29.415  0.00  0.00            
ATOM   1181  HW1 HOH X 378      13.760   2.819  29.292  0.00  0.00            
ATOM   1182  HW2 HOH X 378      12.719   3.457  30.186  0.00  0.00            
ATOM   1183  OW  HOH X 379      11.812  28.700  11.879  0.00  0.00            
ATOM   1184  HW1 HOH X 379      11.294  28.863  11.090  0.00  0.00            
ATOM   1185  HW2 HOH X 379      12.719  28.829  11.602  0.00  0.00            
ATOM   1186  OW  HOH X 380      21.102   6.750  38.786  0.00  0.00            
ATOM   1187  HW1 HOH X 380      21.654   7.458  38.453  0.00  0.00            
ATOM   1188  HW2 HOH X 380      21.387   6.630  39.692  0.00  0.00            
ATOM   1189  OW  HOH X 381       1.290  26.443   7.289  0.00  0.00            
ATOM   1190  HW1 HOH X 381       1.139  25.819   8.000  0.00  0.00            
ATOM   1191  HW2 HOH X 381       1.771  25.943   6.629  0.00  0.00            
ATOM   1192  OW  HOH X 382      26.117   7.409  17.212  0.00  0.00            
ATOM   1193  HW1 HOH X 382      26.934   7.193  17.662  0.00  0.00            
ATOM   1194  HW2 HOH X 382      25.983   8.340  17.390  0.00  0.00            
ATOM   1195  OW  HOH X 383      27.390  16.652   2.220  0.00  0.00            
ATOM   1196  HW1 HOH X 383      26.435  16.703   2.189  0.00  0.00            
ATOM   1197  HW2 HOH X 383      27.684  17.215   1.504  0.00  0.00            
ATOM   1198  OW  HOH X 384       6.422  19.060  32.972  0.00  0.00            
ATOM   1199  HW1 HOH X 384       5.890  19.120  33.766  0.00  0.00            
ATOM   1200  HW2 HOH X 384       6.041  19.706  32.378  0.00  0.00            
ATOM   1201  OW  HOH X 385      10.498  21.034  11.866  0.00  0.00            
ATOM   1202  HW1 HOH X 385      11.140  20.349  11.681  0.00  0.00            
ATOM   1203  HW2 HOH X 385      11.024  21.816  12.036  0.00  0.00            
ATOM   1204  OW  HOH X 386       7.136   8.904  15.831  0.00  0.00            
ATOM   1205  HW1 HOH X 386       7.611   8.111  15.583  0.00  0.00            
ATOM   1206  HW2 HOH X 386       6.242   8.753  15.524  0.00  0.00            
ATOM   1207  OW  HOH X 387       6.014  24.925  29.599  0.00  0.00            
ATOM   1208  HW1 HOH X 387       5.662  24.161  29.142  0.00  0.00            
ATOM   1209  HW2 HOH X 387       5.241  25.398  29.908  0.00  0.00            
ATOM   1210  OW  HOH X 388       3.786  25.293  31.809  0.00  0.00            
ATOM   1211  HW1 HOH X 388       4.224  26.005  32.275  0.00  0.00            
ATOM   1212  HW2 HOH X 388       3.014  25.701  31.418  0.00  0.00            
ATOM   1213  OW  HOH X 389      26.292   9.634   0.658  0.00  0.00            
ATOM   1214  HW1 HOH X 389      25.794   9.728   1.470  0.00  0.00            
ATOM   1215  HW2 HOH X 389      25.629   9.627  -0.031  0.00  0.00            
ATOM   1216  OW  HOH X 390      23.648   1.123  38.826  0.00  0.00            
ATOM   1217  HW1 HOH X 390      24.145   1.189  39.642  0.00  0.00            
ATOM   1218  HW2 HOH X 390      23.390   2.024  38.628  0.00  0.00            
ATOM   1219  OW  HOH X 391      20.543  23.855  18.000  0.00  0.00            
ATOM   1220  HW1 HOH X 391      21.062  24.653  17.899  0.00  0.00            
ATOM   1221  HW2 HOH X 391      19.643  24.165  18.101  0.00  0.00            
ATOM   1222  OW  HOH X 392       8.847  22.425  15.321  0.00  0.00            
ATOM   1223  HW1 HOH X 392       9.380  22.378  16.115  0.00  0.00            
ATOM   1224  HW2 HOH X 392       8.896  23.342  15.053  0.00  0.00            
ATOM   1225  OW  HOH X 393       8.279  17.301   5.258  0.00  0.00            
ATOM   1226  HW1 HOH X 393       7.501  17.713   5.632  0.00  0.00            
ATOM   1227  HW2 HOH X 393       8.960  17.971   5.325  0.00  0.00            
ATOM   1228  OW  HOH X 394      20.540  26.006  35.637  0.00  0.00            
ATOM   1229  HW1 HOH X 394      20.545  26.586  34.875  0.00  0.00            
ATOM   1230  HW2 HOH X 394      21.429  25.653  35.676  0.00  0.00            
ATOM   1231  OW  HOH X 395       0.624   0.445  17.978  0.00  0.00            
ATOM   1232  HW1 HOH X 395       0.616   0.794  18.869  0.00  0.00            
ATOM   1233  HW2 HOH X 395       1.409   0.822  17.580  0.00  0.00            
ATOM   1234  OW  HOH X 396      25.282   8.711  20.344  0.00  0.00            
ATOM   1235  HW1 HOH X 396      24.752   9.131  21.021  0.00  0.00            
ATOM   1236  HW2 HOH X 396      25.656   7.942  20.775  0.00  0.00            
ATOM   1237  OW  HOH X 397      28.538  20.287   5.002  0.00  0.00            
ATOM   1238  HW1 HOH X 397      28.235  20.336   4.095  0.00  0.00            
ATOM   1239  HW2 HOH X 397      29.308  19.720   4.968  0.00  0.00            
ATOM   1240  OW  HOH X 398      24.482  27.304   8.720  0.00  0.00            
ATOM   1241  HW1 HOH X 398      23.853  27.122   8.023  0.00  0.00            
ATOM   1242  HW2 HOH X 398      24.264  26.677   9.410  0.00  0.00            
ATOM   1243  OW  HOH X 399      18.196   2.492  14.597  0.00  0.00            
ATOM   1244  HW1 HOH X 399      17.842   3.016  13.879  0.00  0.00            
ATOM   1245  HW2 HOH X 399      17.435   2.281  15.138  0.00  0.00            
ATOM   1246  OW  HOH X 400      18.177   9.500  23.806  0.00  0.00            
ATOM   1247  HW1 HOH X 400      17.736   9.077  23.069  0.00  0.00            
ATOM   1248  HW2 HOH X 400      17.489  10.004  24.240  0.00  0.00            
ATOM   1249  OW  HOH X 401      28.724  27.030  16.534  0.00  0.00            
ATOM   1250  HW1 HOH X 401      28.534  26.092  16.499  0.00  0.00            
ATOM   1251  HW2 HOH X 401      29.117  27.227  15.684  0.00  0.00            
ATOM   1252  OW  HOH X 402      25.507   1.279  18.665  0.00  0.00            
ATOM   1253  HW1 HOH X 402      24.607   1.604  18.664  0.00  0.00            
ATOM   1254  HW2 HOH X 402      25.442   0.391  19.016  0.00  0.00            
ATOM   1255  OW  HOH X 403      14.317   2.286  37.855  0.00  0.00            
ATOM   1256  HW1 HOH X 403      13.514   1.770  37.934  0.00  0.00            
ATOM   1257  HW2 HOH X 403      15.014   1.635  37.777  0.00  0.00            
ATOM   1258  OW  HOH X 404      16.728  27.815  38.417  0.00  0.00            
ATOM   1259  HW1 HOH X 404      16.452  27.481  37.563  0.00  0.00            
ATOM   1260  HW2 HOH X 404      15.913  27.924  38.907  0.00  0.00            
ATOM   1261  OW  HOH X 405      18.563   2.151  23.050  0.00  0.00            
ATOM   1262  HW1 HOH X 405      17.757   2.587  23.326  0.00  0.00            
ATOM   1263  HW2 HOH X 405      18.269   1.329  22.657  0.00  0.00            
ATOM   1264  OW  HOH X 406      13.247  25.284  18.615  0.00  0.00            
ATOM   1265  HW1 HOH X 406      13.360  25.390  19.559  0.00  0.00            
ATOM   1266  HW2 HOH X 406      13.037  24.356  18.501  0.00  0.00            
ATOM   1267  OW  HOH X 407      19.771   3.279  31.205  0.00  0.00            
ATOM   1268  HW1 HOH X 407      20.691   3.310  31.468  0.00  0.00            
ATOM   1269  HW2 HOH X 407      19.790   2.972  30.299  0.00  0.00            
ATOM   1270  OW  HOH X 408      16.393   0.799   9.550  0.00  0.00            
ATOM   1271  HW1 HOH X 408      17.119   0.680   8.938  0.00  0.00            
ATOM   1272  HW2 HOH X 408      16.614   0.241  10.295  0.00  0.00            
ATOM   1273  OW  HOH X 409       8.319   4.271  11.943  0.00  0.00            
ATOM   1274  HW1 HOH X 409       8.315   3.898  11.062  0.00  0.00            
ATOM   1275  HW2 HOH X 409       8.264   5.216  11.804  0.00  0.00            
ATOM   1276  OW  HOH X 410      25.047  15.792   1.192  0.00  0.00            
ATOM   1277  HW1 HOH X 410      24.098  15.877   1.105  0.00  0.00            
ATOM   1278  HW2 HOH X 410      25.355  15.624   0.301  0.00  0.00            
ATOM   1279  OW  HOH X 411      18.024   6.729   6.189  0.00  0.00            
ATOM   1280  HW1 HOH X 411      18.554   6.659   5.395  0.00  0.00            
ATOM   1281  HW2 HOH X 411      17.689   5.845   6.333  0.00  0.00            
ATOM   1282  OW  HOH X 412      10.864  18.532   2.978  0.00  0.00            
ATOM   1283  HW1 HOH X 412      10.587  19.044   3.739  0.00  0.00            
ATOM   1284  HW2 HOH X 412      10.318  17.746   3.007  0.00  0.00            
ATOM   1285  OW  HOH X 413      15.680  17.368  10.736  0.00  0.00            
ATOM   1286  HW1 HOH X 413      15.196  18.073  11.166  0.00  0.00            
ATOM   1287  HW2 HOH X 413      15.678  16.653  11.372  0.00  0.00            
ATOM   1288  OW  HOH X 414       1.117  28.097   3.389  0.00  0.00            
ATOM   1289  HW1 HOH X 414       0.219  27.806   3.232  0.00  0.00            
ATOM   1290  HW2 HOH X 414       1.468  28.275   2.517  0.00  0.00            
ATOM   1291  OW  HOH X 415       3.463   0.582   2.636  0.00  0.00            
ATOM   1292  HW1 HOH X 415       3.987   0.827   3.399  0.00  0.00            
ATOM   1293  HW2 HOH X 415       3.814  -0.267   2.368  0.00  0.00            
ATOM   1294  OW  HOH X 416      29.200  19.435  25.717  0.00  0.00            
ATOM   1295  HW1 HOH X 416      28.789  19.995  26.375  0.00  0.00            
ATOM   1296  HW2 HOH X 416      29.805  18.885  26.214  0.00  0.00            
ATOM   1297  OW  HOH X 417      28.776  27.004   2.692  0.00  0.00            
ATOM   1298  HW1 HOH X 417      28.413  27.723   2.174  0.00  0.00            
ATOM   1299  HW2 HOH X 417      28.012  26.581   3.083  0.00  0.00            
ATOM   1300  OW  HOH X 418      22.382   8.843   4.909  0.00  0.00            
ATOM   1301  HW1 HOH X 418      22.542   9.575   5.505  0.00  0.00            
ATOM   1302  HW2 HOH X 418      21.461   8.930   4.663  0.00  0.00            
ATOM   1303  OW  HOH X 419       6.829   1.062  14.504  0.00  0.00            
ATOM   1304  HW1 HOH X 419       5.885   0.921  14.433  0.00  0.00            
ATOM   1305  HW2 HOH X 419       6.970   1.934  14.135  0.00  0.00            
ATOM   1306  OW  HOH X 420      29.300  26.270  22.595  0.00  0.00            
ATOM   1307  HW1 HOH X 420      28.374  26.502  22.673  0.00  0.00            
ATOM   1308  HW2 HOH X 420      29.300  25.443  22.112  0.00  0.00            
ATOM   1309  OW  HOH X 421       1.070  25.812   9.948  0.00  0.00            
ATOM   1310  HW1 HOH X 421       1.220  25.177  10.648  0.00  0.00            
ATOM   1311  HW2 HOH X 421       1.934  26.183   9.770  0.00  0.00            
ATOM   1312  OW  HOH X 422       9.271  13.376  26.968  0.00  0.00            
ATOM   1313  HW1 HOH X 422       9.621  13.212  26.092  0.00  0.00            
ATOM   1314  HW2 HOH X 422       9.427  12.561  27.445  0.00  0.00            
ATOM   1315  OW  HOH X 423      27.316   1.952  20.978  0.00  0.00            
ATOM   1316  HW1 HOH X 423      26.421   2.280  21.066  0.00  0.00            
ATOM   1317  HW2 HOH X 423      27.246   1.014  21.151  0.00  0.00            
ATOM   1318  OW  HOH X 424       4.954  19.763  11.542  0.00  0.00            
ATOM   1319  HW1 HOH X 424       5.583  19.157  11.149  0.00  0.00            
ATOM   1320  HW2 HOH X 424       5.496  20.420  11.980  0.00  0.00            
ATOM   1321  OW  HOH X 425      15.694   5.169   6.830  0.00  0.00            
ATOM   1322  HW1 HOH X 425      15.126   5.784   6.366  0.00  0.00            
ATOM   1323  HW2 HOH X 425      15.533   5.345   7.756  0.00  0.00            
ATOM   1324  OW  HOH X 426      18.401  14.579  30.130  0.00  0.00            
ATOM   1325  HW1 HOH X 426      18.453  13.938  29.421  0.00  0.00            
ATOM   1326  HW2 HOH X 426      17.544  14.990  30.020  0.00  0.00            
ATOM   1327  OW  HOH X 427      20.422  11.326  10.146  0.00  0.00            
ATOM   1328  HW1 HOH X 427      21.232  11.389  10.653  0.00  0.00            
ATOM   1329  HW2 HOH X 427      19.738  11.193  10.801  0.00  0.00            
ATOM   1330  OW  HOH X 428       0.368  11.023   4.663  0.00  0.00            
ATOM   1331  HW1 HOH X 428       0.326  11.038   5.619  0.00  0.00            
ATOM   1332  HW2 HOH X 428       0.038  10.157   4.422  0.00  0.00            
ATOM   1333  OW  HOH X 429      16.695  23.329  12.160  0.00  0.00            
ATOM   1334  HW1 HOH X 429      17.286  24.082  12.147  0.00  0.00            
ATOM   1335  HW2 HOH X 429      17.107  22.689  11.581  0.00  0.00            
ATOM   1336  OW  HOH X 430       7.079  10.519  27.536  0.00  0.00            
ATOM   1337  HW1 HOH X 430       7.710  10.643  28.245  0.00  0.00            
ATOM   1338  HW2 HOH X 430       6.576  11.334  27.517  0.00  0.00            
ATOM   1339  OW  HOH X 431      27.306  23.951  24.530  0.00  0.00            
ATOM   1340  HW1 HOH X 431      27.377  23.464  25.351  0.00  0.00            
ATOM   1341  HW2 HOH X 431      26.811  24.738  24.759  0.00  0.00            
ATOM   1342  OW  HOH X 432       6.282   3.302  26.464  0.00  0.00            
ATOM   1343  HW1 HOH X 432       6.691   3.134  27.313  0.00  0.00            
ATOM   1344  HW2 HOH X 432       6.648   4.140  26.182  0.00  0.00            
ATOM   1345  OW  HOH X 433       4.251  14.585  39.373  0.00  0.00            
ATOM   1346  HW1 HOH X 433       4.976  13.979  39.221  0.00  0.00            
ATOM   1347  HW2 HOH X 433       4.463  15.351  38.840  0.00  0.00            
ATOM   1348  OW  HOH X 434       8.632  28.387  34.299  0.00  0.00            
ATOM   1349  HW1 HOH X 434       8.510  28.228  33.363  0.00  0.00            
ATOM   1350  HW2 HOH X 434       8.305  27.593  34.722  0.00  0.00            
ATOM   1351  OW  HOH X 435       9.234  27.919  38.248  0.00  0.00            
ATOM   1352  HW1 HOH X 435       8.691  27.381  37.673  0.00  0.00            
ATOM   1353  HW2 HOH X 435       8.690  28.070  39.021  0.00  0.00            
ATOM   1354  OW  HOH X 436      24.653  25.060  22.011  0.00  0.00            
ATOM   1355  HW1 HOH X 436      24.992  24.165  22.016  0.00  0.00            
ATOM   1356  HW2 HOH X 436      24.194  25.138  21.175  0.00  0.00            
ATOM   1357  OW  HOH X 437      10.516  16.929  14.314  0.00  0.00            
ATOM   1358  HW1 HOH X 437       9.654  16.533  14.183  0.00  0.00            
ATOM   1359  HW2 HOH X 437      10.343  17.869  14.361  0.00  0.00            
ATOM   1360  OW  HOH X 438       7.508  18.947  38.363  0.00  0.00            
ATOM   1361  HW1 HOH X 438       6.634  19.337  38.395  0.00  0.00            
ATOM   1362  HW2 HOH X 438       7.828  19.003  39.264  0.00  0.00            
ATOM   1363  OW  HOH X 439      11.847   2.611  31.649  0.00  0.00            
ATOM   1364  HW1 HOH X 439      12.328   1.785  31.605  0.00  0.00            
ATOM   1365  HW2 HOH X 439      10.936   2.351  31.785  0.00  0.00            
ATOM   1366  OW  HOH X 440      17.621  13.173  32.520  0.00  0.00            
ATOM   1367  HW1 HOH X 440      17.428  13.778  33.236  0.00  0.00            
ATOM   1368  HW2 HOH X 440      17.833  13.739  31.778  0.00  0.00            
ATOM   1369  OW  HOH X 441       7.401   1.356  39.423  0.00  0.00            
ATOM   1370  HW1 HOH X 441       7.370   1.166  38.485  0.00  0.00            
ATOM   1371  HW2 HOH X 441       8.232   1.815  39.547  0.00  0.00            
ATOM   1372  OW  HOH X 442      14.334  15.550  27.748  0.00  0.00            
ATOM   1373  HW1 HOH X 442      13.911  14.699  27.629  0.00  0.00            
ATOM   1374  HW2 HOH X 442      13.709  16.180  27.391  0.00  0.00            
ATOM   1375  OW  HOH X 443       5.398   9.155  10.709  0.00  0.00            
ATOM   1376  HW1 HOH X 443       4.456   9.023  10.813  0.00  0.00            
ATOM   1377  HW2 HOH X 443       5.668   9.604  11.510  0.00  0.00            
ATOM   1378  OW  HOH X 444      -0.258  23.345  16.413  0.00  0.00            
ATOM   1379  HW1 HOH X 444       0.521  23.461  16.958  0.00  0.00            
ATOM   1380  HW2 HOH X 444       0.070  22.945  15.607  0.00  0.00            
ATOM   1381  OW  HOH X 445      14.685  11.411  21.218  0.00  0.00            
ATOM   1382  HW1 HOH X 445      14.920  11.301  20.297  0.00  0.00            
ATOM   1383  HW2 HOH X 445      15.347  12.008  21.565  0.00  0.00            
ATOM   1384  OW  HOH X 446      10.973   1.621  10.434  0.00  0.00            
ATOM   1385  HW1 HOH X 446      10.788   2.182  11.187  0.00  0.00            
ATOM   1386  HW2 HOH X 446      11.757   2.003  10.038  0.00  0.00            
ATOM   1387  OW  HOH X 447       1.102   5.375   8.747  0.00  0.00            
ATOM   1388  HW1 HOH X 447       0.357   5.972   8.678  0.00  0.00            
ATOM   1389  HW2 HOH X 447       1.509   5.397   7.880  0.00  0.00            
ATOM   1390  OW  HOH X 448       5.459  12.386  23.136  0.00  0.00            
ATOM   1391  HW1 HOH X 448       5.847  11.564  23.434  0.00  0.00            
ATOM   1392  HW2 HOH X 448       5.225  12.223  22.222  0.00  0.00            
ATOM   1393  OW  HOH X 449      18.842  17.865  18.054  0.00  0.00            
ATOM   1394  HW1 HOH X 449      18.736  17.120  17.463  0.00  0.00            
ATOM   1395  HW2 HOH X 449      19.660  17.688  18.519  0.00  0.00            
ATOM   1396  OW  HOH X 450      22.593  28.663  20.029  0.00  0.00            
ATOM   1397  HW1 HOH X 450      22.236  28.245  20.812  0.00  0.00            
ATOM   1398  HW2 HOH X 450      23.166  29.353  20.365  0.00  0.00            
ATOM   1399  OW  HOH X 451       2.060  22.610  37.273  0.00  0.00            
ATOM   1400  HW1 HOH X 451       1.846  21.776  37.692  0.00  0.00            
ATOM   1401  HW2 HOH X 451       1.211  23.029  37.125  0.00  0.00            
ATOM   1402  OW  HOH X 452      18.908   7.097  22.298  0.00  0.00            
ATOM   1403  HW1 HOH X 452      19.155   7.373  23.181  0.00  0.00            
ATOM   1404  HW2 HOH X 452      19.695   6.681  21.947  0.00  0.00            
ATOM   1405  OW  HOH X 453       5.474  26.966  32.933  0.00  0.00            
ATOM   1406  HW1 HOH X 453       5.811  27.325  33.754  0.00  0.00            
ATOM   1407  HW2 HOH X 453       5.140  27.726  32.457  0.00  0.00            
ATOM   1408  OW  HOH X 454      23.659  15.209   8.085  0.00  0.00            
ATOM   1409  HW1 HOH X 454      23.324  15.365   8.968  0.00  0.00            
ATOM   1410  HW2 HOH X 454      24.444  15.754   8.028  0.00  0.00            
ATOM   1411  OW  HOH X 455      28.497  13.664  13.743  0.00  0.00            
ATOM   1412  HW1 HOH X 455      28.547  12.887  13.185  0.00  0.00            
ATOM   1413  HW2 HOH X 455      28.363  13.317  14.625  0.00  0.00            
ATOM   1414  OW  HOH X 456       5.617  17.380   2.556  0.00  0.00            
ATOM   1415  HW1 HOH X 456       5.452  17.760   3.419  0.00  0.00            
ATOM   1416  HW2 HOH X 456       5.296  16.480   2.625  0.00  0.00            
ATOM   1417  OW  HOH X 457      28.736   0.780  30.347  0.00  0.00            
ATOM   1418  HW1 HOH X 457      29.011   1.641  30.032  0.00  0.00            
ATOM   1419  HW2 HOH X 457      28.615   0.897  31.289  0.00  0.00            
ATOM   1420  OW  HOH X 458      24.807  17.837   4.396  0.00  0.00            
ATOM   1421  HW1 HOH X 458      24.001  17.686   4.891  0.00  0.00            
ATOM   1422  HW2 HOH X 458      24.883  18.790   4.349  0.00  0.00            
ATOM   1423  OW  HOH X 459      25.445  29.836   9.832  0.00  0.00            
ATOM   1424  HW1 HOH X 459      25.276  29.043   9.323  0.00  0.00            
ATOM   1425  HW2 HOH X 459      24.576  30.180  10.037  0.00  0.00            
ATOM   1426  OW  HOH X 460       6.122   3.151   9.908  0.00  0.00            
ATOM   1427  HW1 HOH X 460       7.007   3.171   9.544  0.00  0.00            
ATOM   1428  HW2 HOH X 460       6.193   3.620  10.739  0.00  0.00            
ATOM   1429  OW  HOH X 461      17.790  26.827  33.402  0.00  0.00            
ATOM   1430  HW1 HOH X 461      17.667  27.512  34.060  0.00  0.00            
ATOM   1431  HW2 HOH X 461      17.721  26.008  33.893  0.00  0.00            
ATOM   1432  OW  HOH X 462      28.663  22.820  34.207  0.00  0.00            
ATOM   1433  HW1 HOH X 462      29.432  22.276  34.038  0.00  0.00            
ATOM   1434  HW2 HOH X 462      27.943  22.359  33.776  0.00  0.00            
ATOM   1435  OW  HOH X 463       3.608  12.093  25.318  0.00  0.00            
ATOM   1436  HW1 HOH X 463       4.303  12.359  25.920  0.00  0.00            
ATOM   1437  HW2 HOH X 463       4.057  11.588  24.641  0.00  0.00            
ATOM   1438  OW  HOH X 464      16.352  30.258  22.443  0.00  0.00            
ATOM   1439  HW1 HOH X 464      16.442  29.374  22.086  0.00  0.00            
ATOM   1440  HW2 HOH X 464      15.665  30.181  23.105  0.00  0.00            
ATOM   1441  OW  HOH X 465       5.310  26.684   5.186  0.00  0.00            
ATOM   1442  HW1 HOH X 465       5.475  26.729   4.245  0.00  0.00            
ATOM   1443  HW2 HOH X 465       4.470  26.230   5.261  0.00  0.00            
ATOM   1444  OW  HOH X 466       9.141  23.864  24.357  0.00  0.00            
ATOM   1445  HW1 HOH X 466       8.877  24.783  24.410  0.00  0.00            
ATOM   1446  HW2 HOH X 466       9.500  23.667  25.222  0.00  0.00            
ATOM   1447  OW  HOH X 467      20.585  21.457  12.279  0.00  0.00            
ATOM   1448  HW1 HOH X 467      20.062  20.697  12.025  0.00  0.00            
ATOM   1449  HW2 HOH X 467      20.353  22.132  11.641  0.00  0.00            
ATOM   1450  OW  HOH X 468      25.073   0.672  36.240  0.00  0.00            
ATOM   1451  HW1 HOH X 468      24.285   0.156  36.068  0.00  0.00            
ATOM   1452  HW2 HOH X 468      25.040   0.853  37.180  0.00  0.00            
ATOM   1453  OW  HOH X 469      17.179  18.650   7.190  0.00  0.00            
ATOM   1454  HW1 HOH X 469      17.662  17.825   7.136  0.00  0.00            
ATOM   1455  HW2 HOH X 469      17.414  19.009   8.046  0.00  0.00            
ATOM   1456  OW  HOH X 470      18.416  20.569  18.072  0.00  0.00            
ATOM   1457  HW1 HOH X 470      17.890  20.855  17.325  0.00  0.00            
ATOM   1458  HW2 HOH X 470      18.690  19.680  17.846  0.00  0.00            
ATOM   1459  OW  HOH X 471      29.167   8.792  28.929  0.00  0.00            
ATOM   1460  HW1 HOH X 471      29.797   9.469  29.178  0.00  0.00            
ATOM   1461  HW2 HOH X 471      28.582   8.720  29.684  0.00  0.00            
ATOM   1462  OW  HOH X 472       6.389  16.535  27.495  0.00  0.00            
ATOM   1463  HW1 HOH X 472       7.127  17.120  27.666  0.00  0.00            
ATOM   1464  HW2 HOH X 472       6.610  15.728  27.962  0.00  0.00            
ATOM   1465  OW  HOH X 473       2.487  21.420  10.777  0.00  0.00            
ATOM   1466  HW1 HOH X 473       3.257  21.857  10.415  0.00  0.00            
ATOM   1467  HW2 HOH X 473       1.762  22.017  10.590  0.00  0.00            
ATOM   1468  OW  HOH X 474       8.586  25.376  29.873  0.00  0.00            
ATOM   1469  HW1 HOH X 474       7.653  25.166  29.919  0.00  0.00            
ATOM   1470  HW2 HOH X 474       9.005  24.552  29.627  0.00  0.00            
ATOM   1471  OW  HOH X 475       0.995  16.279  21.865  0.00  0.00            
ATOM   1472  HW1 HOH X 475       0.431  16.192  22.633  0.00  0.00            
ATOM   1473  HW2 HOH X 475       1.859  15.998  22.167  0.00  0.00            
ATOM   1474  OW  HOH X 476      13.276  11.756  13.013  0.00  0.00            
ATOM   1475  HW1 HOH X 476      12.913  11.053  13.552  0.00  0.00            
ATOM   1476  HW2 HOH X 476      13.955  12.151  13.560  0.00  0.00            
ATOM   1477  OW  HOH X 477       5.676   3.470  13.528  0.00  0.00            
ATOM   1478  HW1 HOH X 477       5.854   4.156  12.884  0.00  0.00            
ATOM   1479  HW2 HOH X 477       4.802   3.151  13.302  0.00  0.00            
ATOM   1480  OW  HOH X 478       9.685  10.500  34.622  0.00  0.00            
ATOM   1481  HW1 HOH X 478       9.000  10.945  35.121  0.00  0.00            
ATOM   1482  HW2 HOH X 478      10.361  10.299  35.268  0.00  0.00            
ATOM   1483  OW  HOH X 479      25.724   7.658  12.316  0.00  0.00            
ATOM   1484  HW1 HOH X 479      26.282   7.392  13.047  0.00  0.00            
ATOM   1485  HW2 HOH X 479      24.974   7.065  12.359  0.00  0.00            
ATOM   1486  OW  HOH X 480      20.602   5.491   5.127  0.00  0.00            
ATOM   1487  HW1 HOH X 480      20.956   5.979   5.870  0.00  0.00            
ATOM   1488  HW2 HOH X 480      20.261   6.164   4.538  0.00  0.00            
ATOM   1489  OW  HOH X 481       6.284  -0.113  20.955  0.00  0.00            
ATOM   1490  HW1 HOH X 481       5.535   0.470  21.082  0.00  0.00            
ATOM   1491  HW2 HOH X 481       6.548   0.030  20.047  0.00  0.00            
ATOM   1492  OW  HOH X 482       6.116   2.333   1.550  0.00  0.00            
ATOM   1493  HW1 HOH X 482       6.587   1.859   0.864  0.00  0.00            
ATOM   1494  HW2 HOH X 482       5.473   1.704   1.878  0.00  0.00            
ATOM   1495  OW  HOH X 483      25.451  19.028   9.718  0.00  0.00            
ATOM   1496  HW1 HOH X 483      24.960  19.270   8.933  0.00  0.00            
ATOM   1497  HW2 HOH X 483      26.234  19.578   9.689  0.00  0.00            
ATOM   1498  OW  HOH X 484      20.656  18.886   5.611  0.00  0.00            
ATOM   1499  HW1 HOH X 484      20.766  19.625   6.208  0.00  0.00            
ATOM   1500  HW2 HOH X 484      21.352  18.275   5.854  0.00  0.00            
ATOM   1501  OW  HOH X 485      28.193  18.259   8.500  0.00  0.00            
ATOM   1502  HW1 HOH X 485      28.898  17.622   8.619  0.00  0.00            
ATOM   1503  HW2 HOH X 485      27.857  18.084   7.621  0.00  0.00            
ATOM   1504  OW  HOH X 486      26.964  17.174   6.182  0.00  0.00            
ATOM   1505  HW1 HOH X 486      27.674  16.960   5.576  0.00  0.00            
ATOM   1506  HW2 HOH X 486      26.256  17.490   5.621  0.00  0.00            
ATOM   1507  OW  HOH X 487       8.067  10.338  31.628  0.00  0.00            
ATOM   1508  HW1 HOH X 487       7.260  10.668  32.023  0.00  0.00            
ATOM   1509  HW2 HOH X 487       8.591  10.036  32.370  0.00  0.00            
ATOM   1510  OW  HOH X 488      17.434   4.673  21.294  0.00  0.00            
ATOM   1511  HW1 HOH X 488      18.314   4.896  21.598  0.00  0.00            
ATOM   1512  HW2 HOH X 488      17.297   5.231  20.528  0.00  0.00            
ATOM   1513  OW  HOH X 489      28.541  25.616  33.851  0.00  0.00            
ATOM   1514  HW1 HOH X 489      29.447  25.924  33.803  0.00  0.00            
ATOM   1515  HW2 HOH X 489      28.615  24.666  33.938  0.00  0.00            
ATOM   1516  OW  HOH X 490      10.141  10.262   1.789  0.00  0.00            
ATOM   1517  HW1 HOH X 490      10.476  10.187   0.896  0.00  0.00            
ATOM   1518  HW2 HOH X 490      10.662   9.636   2.293  0.00  0.00            
ATOM   1519  OW  HOH X 491      17.161  17.274  20.223  0.00  0.00            
ATOM   1520  HW1 HOH X 491      16.388  17.406  19.674  0.00  0.00            
ATOM   1521  HW2 HOH X 491      17.901  17.413  19.633  0.00  0.00            
ATOM   1522  OW  HOH X 492       0.345  19.241   0.899  0.00  0.00            
ATOM   1523  HW1 HOH X 492       0.651  18.556   1.494  0.00  0.00            
ATOM   1524  HW2 HOH X 492       0.308  18.816   0.042  0.00  0.00            
ATOM   1525  OW  HOH X 493      19.306   3.172   9.679  0.00  0.00            
ATOM   1526  HW1 HOH X 493      19.998   3.799   9.892  0.00  0.00            
ATOM   1527  HW2 HOH X 493      18.514   3.550  10.059  0.00  0.00            
ATOM   1528  OW  HOH X 494       1.024  17.640  32.011  0.00  0.00            
ATOM   1529  HW1 HOH X 494       0.682  16.840  32.411  0.00  0.00            
ATOM   1530  HW2 HOH X 494       0.380  18.313  32.232  0.00  0.00            
ATOM   1531  OW  HOH X 495      14.873  16.761   5.181  0.00  0.00            
ATOM   1532  HW1 HOH X 495      14.767  16.979   6.107  0.00  0.00            
ATOM   1533  HW2 HOH X 495      13.998  16.866   4.808  0.00  0.00            
ATOM   1534  OW  HOH X 496      12.669  24.844  14.440  0.00  0.00            
ATOM   1535  HW1 HOH X 496      12.538  23.915  14.251  0.00  0.00            
ATOM   1536  HW2 HOH X 496      13.155  25.176  13.686  0.00  0.00            
ATOM   1537  OW  HOH X 497      14.977   9.248  13.295  0.00  0.00            
ATOM   1538  HW1 HOH X 497      15.926   9.135  13.239  0.00  0.00            
ATOM   1539  HW2 HOH X 497      14.851  10.196  13.334  0.00  0.00            
ATOM   1540  OW  HOH X 498      10.504  18.367  18.112  0.00  0.00            
ATOM   1541  HW1 HOH X 498      10.509  17.414  18.021  0.00  0.00            
ATOM   1542  HW2 HOH X 498      10.555  18.517  19.056  0.00  0.00            
ATOM   1543  OW  HOH X 499      17.523   8.334  36.444  0.00  0.00            
ATOM   1544  HW1 HOH X 499      16.880   8.451  35.744  0.00  0.00            
ATOM   1545  HW2 HOH X 499      18.235   7.841  36.035  0.00  0.00            
ATOM   1546  OW  HOH X 500       6.726  14.119  15.680  0.00  0.00            
ATOM   1547  HW1 HOH X 500       7.522  13.595  15.769  0.00  0.00            
ATOM   1548  HW2 HOH X 500       6.276  13.744  14.923  0.00  0.00            
ATOM   1549  OW  HOH X 501      25.143   4.006  25.295  0.00  0.00            
ATOM   1550  HW1 HOH X 501      25.673   3.224  25.143  0.00  0.00            
ATOM   1551  HW2 HOH X 501      25.110   4.093  26.248  0.00  0.00            
ATOM   1552  OW  HOH X 502      26.415   1.153  12.151  0.00  0.00            
ATOM   1553  HW1 HOH X 502      26.218   0.513  11.466  0.00  0.00            
ATOM   1554  HW2 HOH X 502      26.798   1.895  11.683  0.00  0.00            
ATOM   1555  OW  HOH X 503      30.044  18.233  34.750  0.00  0.00            
ATOM   1556  HW1 HOH X 503      30.246  19.052  34.297  0.00  0.00            
ATOM   1557  HW2 HOH X 503      29.147  18.028  34.486  0.00  0.00            
ATOM   1558  OW  HOH X 504      25.986   6.275  21.415  0.00  0.00            
ATOM   1559  HW1 HOH X 504      25.337   6.144  20.723  0.00  0.00            
ATOM   1560  HW2 HOH X 504      25.496   6.159  22.229  0.00  0.00            
ATOM   1561  OW  HOH X 505       3.218  15.464   5.802  0.00  0.00            
ATOM   1562  HW1 HOH X 505       2.612  15.191   6.491  0.00  0.00            
ATOM   1563  HW2 HOH X 505       2.846  15.102   4.998  0.00  0.00            
ATOM   1564  OW  HOH X 506       0.528   4.920  34.375  0.00  0.00            
ATOM   1565  HW1 HOH X 506       0.671   5.774  33.968  0.00  0.00            
ATOM   1566  HW2 HOH X 506      -0.371   4.956  34.702  0.00  0.00            
ATOM   1567  OW  HOH X 507       3.706   7.137   6.589  0.00  0.00            
ATOM   1568  HW1 HOH X 507       2.850   6.739   6.429  0.00  0.00            
ATOM   1569  HW2 HOH X 507       4.144   7.116   5.738  0.00  0.00            
ATOM   1570  OW  HOH X 508      17.325   1.762  27.227  0.00  0.00            
ATOM   1571  HW1 HOH X 508      16.819   1.785  28.040  0.00  0.00            
ATOM   1572  HW2 HOH X 508      17.415   0.830  27.027  0.00  0.00            
ATOM   1573  OW  HOH X 509       4.817  25.740  17.374  0.00  0.00            
ATOM   1574  HW1 HOH X 509       4.561  26.103  16.526  0.00  0.00            
ATOM   1575  HW2 HOH X 509       5.629  25.266  17.198  0.00  0.00            
ATOM   1576  OW  HOH X 510      23.911  24.496  25.562  0.00  0.00            
ATOM   1577  HW1 HOH X 510      23.316  24.524  26.312  0.00  0.00            
ATOM   1578  HW2 HOH X 510      24.610  25.110  25.788  0.00  0.00            
ATOM   1579  OW  HOH X 511       0.705  24.882   2.179  0.00  0.00            
ATOM   1580  HW1 HOH X 511       0.159  25.648   2.356  0.00  0.00            
ATOM   1581  HW2 HOH X 511       0.617  24.339   2.963  0.00  0.00            
ATOM   1582  OW  HOH X 512      19.137  20.667  25.844  0.00  0.00            
ATOM   1583  HW1 HOH X 512      18.354  20.548  26.382  0.00  0.00            
ATOM   1584  HW2 HOH X 512      19.410  19.779  25.617  0.00  0.00            
ATOM   1585  OW  HOH X 513      22.563   9.251  33.747  0.00  0.00            
ATOM   1586  HW1 HOH X 513      22.361   8.392  33.375  0.00  0.00            
ATOM   1587  HW2 HOH X 513      21.870   9.404  34.389  0.00  0.00            
ATOM   1588  OW  HOH X 514      13.313   9.729   5.608  0.00  0.00            
ATOM   1589  HW1 HOH X 514      14.243   9.536   5.724  0.00  0.00            
ATOM   1590  HW2 HOH X 514      13.274  10.249   4.806  0.00  0.00            
ATOM   1591  OW  HOH X 515       4.153   0.055  27.605  0.00  0.00            
ATOM   1592  HW1 HOH X 515       4.745  -0.315  26.950  0.00  0.00            
ATOM   1593  HW2 HOH X 515       3.860   0.883  27.225  0.00  0.00            
ATOM   1594  OW  HOH X 516       3.891  18.287  28.005  0.00  0.00            
ATOM   1595  HW1 HOH X 516       3.692  18.003  28.898  0.00  0.00            
ATOM   1596  HW2 HOH X 516       4.667  17.782  27.760  0.00  0.00            
ATOM   1597  OW  HOH X 517       3.182  16.087  23.833  0.00  0.00            
ATOM   1598  HW1 HOH X 517       4.033  15.921  24.240  0.00  0.00            
ATOM   1599  HW2 HOH X 517       3.043  17.027  23.943  0.00  0.00            
ATOM   1600  OW  HOH X 518      26.634  26.841  35.028  0.00  0.00            
ATOM   1601  HW1 HOH X 518      25.763  26.733  34.646  0.00  0.00            
ATOM   1602  HW2 HOH X 518      27.195  26.258  34.516  0.00  0.00            
ATOM   1603  OW  HOH X 519      26.669  16.910  28.519  0.00  0.00            
ATOM   1604  HW1 HOH X 519      25.899  16.378  28.317  0.00  0.00            
ATOM   1605  HW2 HOH X 519      26.313  17.760  28.775  0.00  0.00            
ATOM   1606  OW  HOH X 520       4.512  20.244   6.573  0.00  0.00            
ATOM   1607  HW1 HOH X 520       3.860  20.026   7.239  0.00  0.00            
ATOM   1608  HW2 HOH X 520       4.536  21.201   6.565  0.00  0.00            
ATOM   1609  OW  HOH X 521       5.489   7.612  22.471  0.00  0.00            
ATOM   1610  HW1 HOH X 521       6.284   8.144  22.505  0.00  0.00            
ATOM   1611  HW2 HOH X 521       5.478   7.142  23.305  0.00  0.00            
ATOM   1612  OW  HOH X 522      11.020   4.762  27.652  0.00  0.00            
ATOM   1613  HW1 HOH X 522      11.899   4.557  27.971  0.00  0.00            
ATOM   1614  HW2 HOH X 522      10.648   3.913  27.411  0.00  0.00            
ATOM   1615  OW  HOH X 523       0.431  19.541  13.423  0.00  0.00            
ATOM   1616  HW1 HOH X 523      -0.230  19.086  12.901  0.00  0.00            
ATOM   1617  HW2 HOH X 523       0.100  19.497  14.320  0.00  0.00            
ATOM   1618  OW  HOH X 524      10.449   8.677  23.860  0.00  0.00            
ATOM   1619  HW1 HOH X 524       9.844   9.229  24.354  0.00  0.00            
ATOM   1620  HW2 HOH X 524      10.305   8.922  22.946  0.00  0.00            
ATOM   1621  OW  HOH X 525      28.699  27.712  30.255  0.00  0.00            
ATOM   1622  HW1 HOH X 525      27.928  27.365  30.705  0.00  0.00            
ATOM   1623  HW2 HOH X 525      28.810  28.593  30.614  0.00  0.00            
ATOM   1624  OW  HOH X 526       9.482   0.694  28.705  0.00  0.00            
ATOM   1625  HW1 HOH X 526      10.051   1.289  29.193  0.00  0.00            
ATOM   1626  HW2 HOH X 526       8.700   0.609  29.251  0.00  0.00            
ATOM   1627  OW  HOH X 527      16.642   7.894   3.781  0.00  0.00            
ATOM   1628  HW1 HOH X 527      15.853   7.388   3.587  0.00  0.00            
ATOM   1629  HW2 HOH X 527      16.552   8.134   4.704  0.00  0.00            
ATOM   1630  OW  HOH X 528       4.808   9.578  35.889  0.00  0.00            
ATOM   1631  HW1 HOH X 528       4.969  10.519  35.814  0.00  0.00            
ATOM   1632  HW2 HOH X 528       5.472   9.176  35.330  0.00  0.00            
ATOM   1633  OW  HOH X 529      27.554  15.388  20.924  0.00  0.00            
ATOM   1634  HW1 HOH X 529      27.196  15.700  21.755  0.00  0.00            
ATOM   1635  HW2 HOH X 529      28.376  15.868  20.822  0.00  0.00            
ATOM   1636  OW  HOH X 530      27.233  18.553  40.270  0.00  0.00            
ATOM   1637  HW1 HOH X 530      27.660  18.199  39.490  0.00  0.00            
ATOM   1638  HW2 HOH X 530      26.945  19.428  40.009  0.00  0.00            
ATOM   1639  OW  HOH X 531       8.060  11.609   0.485  0.00  0.00            
ATOM   1640  HW1 HOH X 531       7.479  11.141   1.084  0.00  0.00            
ATOM   1641  HW2 HOH X 531       8.928  11.531   0.881  0.00  0.00            
ATOM   1642  OW  HOH X 532      19.442   8.302  19.566  0.00  0.00            
ATOM   1643  HW1 HOH X 532      19.528   9.047  18.972  0.00  0.00            
ATOM   1644  HW2 HOH X 532      18.915   8.634  20.293  0.00  0.00            
ATOM   1645  OW  HOH X 533      19.703  25.714  13.554  0.00  0.00            
ATOM   1646  HW1 HOH X 533      20.562  25.332  13.375  0.00  0.00            
ATOM   1647  HW2 HOH X 533      19.187  24.989  13.905  0.00  0.00            
ATOM   1648  OW  HOH X 534      20.335  27.251   7.182  0.00  0.00            
ATOM   1649  HW1 HOH X 534      19.807  26.832   6.503  0.00  0.00            
ATOM   1650  HW2 HOH X 534      19.936  26.969   8.005  0.00  0.00            
ATOM   1651  OW  HOH X 535      19.752  22.050   7.155  0.00  0.00            
ATOM   1652  HW1 HOH X 535      19.033  22.531   7.566  0.00  0.00            
ATOM   1653  HW2 HOH X 535      19.358  21.643   6.384  0.00  0.00            
ATOM   1654  OW  HOH X 536      23.352  21.969  34.201  0.00  0.00            
ATOM   1655  HW1 HOH X 536      22.408  22.080  34.313  0.00  0.00            
ATOM   1656  HW2 HOH X 536      23.512  22.185  33.282  0.00  0.00            
ATOM   1657  OW  HOH X 537       2.180  16.111  30.074  0.00  0.00            
ATOM   1658  HW1 HOH X 537       3.065  16.412  30.281  0.00  0.00            
ATOM   1659  HW2 HOH X 537       1.607  16.678  30.590  0.00  0.00            
ATOM   1660  OW  HOH X 538       7.265  19.733   6.008  0.00  0.00            
ATOM   1661  HW1 HOH X 538       6.340  19.970   6.080  0.00  0.00            
ATOM   1662  HW2 HOH X 538       7.569  19.677   6.914  0.00  0.00            
ATOM   1663  OW  HOH X 539      26.460  14.299  26.247  0.00  0.00            
ATOM   1664  HW1 HOH X 539      27.344  14.130  25.921  0.00  0.00            
ATOM   1665  HW2 HOH X 539      26.196  13.478  26.662  0.00  0.00            
ATOM   1666  OW  HOH X 540       8.934   7.309   0.556  0.00  0.00            
ATOM   1667  HW1 HOH X 540       7.994   7.460   0.653  0.00  0.00            
ATOM   1668  HW2 HOH X 540       9.290   7.438   1.436  0.00  0.00            
ATOM   1669  OW  HOH X 541      17.294   5.525  30.490  0.00  0.00            
ATOM   1670  HW1 HOH X 541      17.246   6.449  30.737  0.00  0.00            
ATOM   1671  HW2 HOH X 541      17.693   5.096  31.247  0.00  0.00            
ATOM   1672  OW  HOH X 542      20.000  15.279  12.456  0.00  0.00            
ATOM   1673  HW1 HOH X 542      19.935  14.587  11.798  0.00  0.00            
ATOM   1674  HW2 HOH X 542      20.253  16.058  11.962  0.00  0.00            
ATOM   1675  OW  HOH X 543      30.094  16.547  10.297  0.00  0.00            
ATOM   1676  HW1 HOH X 543      29.590  15.872   9.844  0.00  0.00            
ATOM   1677  HW2 HOH X 543      30.184  16.220  11.192  0.00  0.00            
ATOM   1678  OW  HOH X 544       8.713  27.924  31.529  0.00  0.00            
ATOM   1679  HW1 HOH X 544       8.275  27.165  31.144  0.00  0.00            
ATOM   1680  HW2 HOH X 544       8.395  28.669  31.019  0.00  0.00            
ATOM   1681  OW  HOH X 545       8.399  15.099  37.959  0.00  0.00            
ATOM   1682  HW1 HOH X 545       9.318  15.107  37.692  0.00  0.00            
ATOM   1683  HW2 HOH X 545       8.389  15.556  38.800  0.00  0.00            
ATOM   1684  OW  HOH X 546       8.649  15.505   8.085  0.00  0.00            
ATOM   1685  HW1 HOH X 546       8.778  14.558   8.131  0.00  0.00            
ATOM   1686  HW2 HOH X 546       7.705  15.624   8.194  0.00  0.00            
ATOM   1687  OW  HOH X 547      14.549  14.569  10.957  0.00  0.00            
ATOM   1688  HW1 HOH X 547      15.059  14.509  11.765  0.00  0.00            
ATOM   1689  HW2 HOH X 547      14.994  13.981  10.348  0.00  0.00            
ATOM   1690  OW  HOH X 548       8.994  15.571   1.973  0.00  0.00            
ATOM   1691  HW1 HOH X 548       9.514  15.703   2.766  0.00  0.00            
ATOM   1692  HW2 HOH X 548       8.273  15.007   2.251  0.00  0.00            
ATOM   1693  OW  HOH X 549      23.736  21.995  27.720  0.00  0.00            
ATOM   1694  HW1 HOH X 549      23.142  22.368  27.069  0.00  0.00            
ATOM   1695  HW2 HOH X 549      23.167  21.496  28.306  0.00  0.00            
ATOM   1696  OW  HOH X 550      10.655   4.161  18.631  0.00  0.00            
ATOM   1697  HW1 HOH X 550      10.858   3.666  17.837  0.00  0.00            
ATOM   1698  HW2 HOH X 550      10.886   3.569  19.348  0.00  0.00            
ATOM   1699  OW  HOH X 551      19.616  28.695  36.900  0.00  0.00            
ATOM   1700  HW1 HOH X 551      19.980  29.128  36.128  0.00  0.00            
ATOM   1701  HW2 HOH X 551      19.640  27.762  36.686  0.00  0.00            
ATOM   1702  OW  HOH X 552      26.995   5.313  29.925  0.00  0.00            
ATOM   1703  HW1 HOH X 552      26.154   5.337  29.468  0.00  0.00            
ATOM   1704  HW2 HOH X 552      27.648   5.403  29.230  0.00  0.00            
ATOM   1705  OW  HOH X 553       2.420   9.300  34.473  0.00  0.00            
ATOM   1706  HW1 HOH X 553       1.958  10.056  34.836  0.00  0.00            
ATOM   1707  HW2 HOH X 553       2.994   9.007  35.181  0.00  0.00            
ATOM   1708  OW  HOH X 554      23.499   9.966  22.190  0.00  0.00            
ATOM   1709  HW1 HOH X 554      23.525   9.492  23.022  0.00  0.00            
ATOM   1710  HW2 HOH X 554      22.627  10.360  22.167  0.00  0.00            
ATOM   1711  OW  HOH X 555       6.143   0.573  18.224  0.00  0.00            
ATOM   1712  HW1 HOH X 555       5.686   1.358  17.920  0.00  0.00            
ATOM   1713  HW2 HOH X 555       6.659   0.288  17.470  0.00  0.00            
ATOM   1714  OW  HOH X 556      11.409  27.570  34.426  0.00  0.00            
ATOM   1715  HW1 HOH X 556      11.388  26.623  34.291  0.00  0.00            
ATOM   1716  HW2 HOH X 556      10.613  27.891  34.001  0.00  0.00            
ATOM   1717  OW  HOH X 557       7.950  18.131   1.115  0.00  0.00            
ATOM   1718  HW1 HOH X 557       7.102  17.873   1.476  0.00  0.00            
ATOM   1719  HW2 HOH X 557       8.491  17.344   1.187  0.00  0.00            
ATOM   1720  OW  HOH X 558       9.886  19.927  25.668  0.00  0.00            
ATOM   1721  HW1 HOH X 558       9.579  19.025  25.571  0.00  0.00            
ATOM   1722  HW2 HOH X 558      10.382  19.925  26.487  0.00  0.00            
ATOM   1723  OW  HOH X 559      28.393  12.587  22.603  0.00  0.00            
ATOM   1724  HW1 HOH X 559      28.957  12.545  23.375  0.00  0.00            
ATOM   1725  HW2 HOH X 559      28.984  12.818  21.886  0.00  0.00            
ATOM   1726  OW  HOH X 560      11.157   9.785   7.802  0.00  0.00            
ATOM   1727  HW1 HOH X 560      11.401  10.693   7.624  0.00  0.00            
ATOM   1728  HW2 HOH X 560      10.514   9.843   8.509  0.00  0.00            
ATOM   1729  OW  HOH X 561       9.438  25.106  15.323  0.00  0.00            
ATOM   1730  HW1 HOH X 561       9.406  25.542  16.175  0.00  0.00            
ATOM   1731  HW2 HOH X 561       9.656  25.804  14.705  0.00  0.00            
ATOM   1732  OW  HOH X 562      29.001  11.230  39.357  0.00  0.00            
ATOM   1733  HW1 HOH X 562      29.282  11.573  40.205  0.00  0.00            
ATOM   1734  HW2 HOH X 562      29.404  11.815  38.715  0.00  0.00            
ATOM   1735  OW  HOH X 563      24.061   3.934  36.226  0.00  0.00            
ATOM   1736  HW1 HOH X 563      23.343   3.341  36.444  0.00  0.00            
ATOM   1737  HW2 HOH X 563      24.228   4.417  37.035  0.00  0.00            
ATOM   1738  OW  HOH X 564       1.613   4.245  25.595  0.00  0.00            
ATOM   1739  HW1 HOH X 564       0.667   4.368  25.523  0.00  0.00            
ATOM   1740  HW2 HOH X 564       1.987   4.943  25.058  0.00  0.00            
ATOM   1741  OW  HOH X 565       7.987  11.003  36.838  0.00  0.00            
ATOM   1742  HW1 HOH X 565       8.150  10.062  36.890  0.00  0.00            
ATOM   1743  HW2 HOH X 565       7.750  11.256  37.730  0.00  0.00            
ATOM   1744  OW  HOH X 566       7.281  14.771   5.358  0.00  0.00            
ATOM   1745  HW1 HOH X 566       7.752  15.581   5.554  0.00  0.00            
ATOM   1746  HW2 HOH X 566       6.665  15.013   4.666  0.00  0.00            
ATOM   1747  OW  HOH X 567      10.878   6.599   7.326  0.00  0.00            
ATOM   1748  HW1 HOH X 567       9.959   6.402   7.147  0.00  0.00            
ATOM   1749  HW2 HOH X 567      11.303   5.742   7.370  0.00  0.00            
ATOM   1750  OW  HOH X 568      12.795  21.407  35.302  0.00  0.00            
ATOM   1751  HW1 HOH X 568      12.221  21.501  34.542  0.00  0.00            
ATOM   1752  HW2 HOH X 568      12.303  21.796  36.025  0.00  0.00            
ATOM   1753  OW  HOH X 569       3.858  20.621  26.690  0.00  0.00            
ATOM   1754  HW1 HOH X 569       4.436  20.332  25.984  0.00  0.00            
ATOM   1755  HW2 HOH X 569       3.791  19.863  27.271  0.00  0.00            
ATOM   1756  OW  HOH X 570      16.376  26.875  14.155  0.00  0.00            
ATOM   1757  HW1 HOH X 570      16.798  26.276  13.539  0.00  0.00            
ATOM   1758  HW2 HOH X 570      16.076  26.313  14.869  0.00  0.00            
ATOM   1759  OW  HOH X 571      13.271  19.227  29.817  0.00  0.00            
ATOM   1760  HW1 HOH X 571      14.041  18.913  30.292  0.00  0.00            
ATOM   1761  HW2 HOH X 571      12.528  18.868  30.302  0.00  0.00            
ATOM   1762  OW  HOH X 572      12.157  27.840  37.160  0.00  0.00            
ATOM   1763  HW1 HOH X 572      11.408  27.643  37.724  0.00  0.00            
ATOM   1764  HW2 HOH X 572      11.862  27.607  36.280  0.00  0.00            
ATOM   1765  OW  HOH X 573      16.610  21.878  31.618  0.00  0.00            
ATOM   1766  HW1 HOH X 573      16.984  21.050  31.922  0.00  0.00            
ATOM   1767  HW2 HOH X 573      15.767  21.939  32.066  0.00  0.00            
ATOM   1768  OW  HOH X 574       0.477  24.004   4.762  0.00  0.00            
ATOM   1769  HW1 HOH X 574       0.741  23.136   5.067  0.00  0.00            
ATOM   1770  HW2 HOH X 574      -0.296  24.218   5.285  0.00  0.00            
ATOM   1771  OW  HOH X 575       4.978  14.897  22.202  0.00  0.00            
ATOM   1772  HW1 HOH X 575       5.242  14.184  22.784  0.00  0.00            
ATOM   1773  HW2 HOH X 575       4.345  15.402  22.713  0.00  0.00            
ATOM   1774  OW  HOH X 576      13.449  20.649   2.802  0.00  0.00            
ATOM   1775  HW1 HOH X 576      13.590  20.042   2.075  0.00  0.00            
ATOM   1776  HW2 HOH X 576      14.004  20.313   3.506  0.00  0.00            
ATOM   1777  OW  HOH X 577       9.844   1.981   0.433  0.00  0.00            
ATOM   1778  HW1 HOH X 577      10.291   2.824   0.496  0.00  0.00            
ATOM   1779  HW2 HOH X 577       9.912   1.606   1.311  0.00  0.00            
ATOM   1780  OW  HOH X 578      28.743  15.986  30.403  0.00  0.00            
ATOM   1781  HW1 HOH X 578      28.098  16.259  29.749  0.00  0.00            
ATOM   1782  HW2 HOH X 578      28.866  15.051  30.242  0.00  0.00            
ATOM   1783  OW  HOH X 579      21.629  24.135   3.275  0.00  0.00            
ATOM   1784  HW1 HOH X 579      20.915  24.628   2.870  0.00  0.00            
ATOM   1785  HW2 HOH X 579      21.502  24.258   4.216  0.00  0.00            
ATOM   1786  OW  HOH X 580      24.427   1.648  14.608  0.00  0.00            
ATOM   1787  HW1 HOH X 580      23.926   1.045  15.157  0.00  0.00            
ATOM   1788  HW2 HOH X 580      24.909   1.080  14.006  0.00  0.00            
ATOM   1789  OW  HOH X 581      25.515  19.424  28.343  0.00  0.00            
ATOM   1790  HW1 HOH X 581      24.934  20.155  28.134  0.00  0.00            
ATOM   1791  HW2 HOH X 581      25.454  19.334  29.295  0.00  0.00            
ATOM   1792  OW  HOH X 582      17.866  25.606  11.487  0.00  0.00            
ATOM   1793  HW1 HOH X 582      18.601  25.743  12.086  0.00  0.00            
ATOM   1794  HW2 HOH X 582      18.019  26.227  10.774  0.00  0.00            
ATOM   1795  OW  HOH X 583      20.312   0.834  10.184  0.00  0.00            
ATOM   1796  HW1 HOH X 583      19.992   1.702   9.939  0.00  0.00            
ATOM   1797  HW2 HOH X 583      19.785   0.590  10.945  0.00  0.00            
ATOM   1798  OW  HOH X 584      13.478  18.823  17.722  0.00  0.00            
ATOM   1799  HW1 HOH X 584      13.585  18.647  16.787  0.00  0.00            
ATOM   1800  HW2 HOH X 584      12.611  19.224  17.792  0.00  0.00            
ATOM   1801  OW  HOH X 585      17.437  -0.088   1.432  0.00  0.00            
ATOM   1802  HW1 HOH X 585      16.998   0.745   1.262  0.00  0.00            
ATOM   1803  HW2 HOH X 585      17.953  -0.253   0.643  0.00  0.00            
ATOM   1804  OW  HOH X 586      14.319   0.757  24.149  0.00  0.00            
ATOM   1805  HW1 HOH X 586      13.780   1.250  23.531  0.00  0.00            
ATOM   1806  HW2 HOH X 586      13.710   0.149  24.568  0.00  0.00            
ATOM   1807  OW  HOH X 587      25.335  14.591  34.795  0.00  0.00            
ATOM   1808  HW1 HOH X 587      25.697  15.383  35.192  0.00  0.00            
ATOM   1809  HW2 HOH X 587      24.545  14.889  34.343  0.00  0.00            
ATOM   1810  OW  HOH X 588       0.640  27.734  18.356  0.00  0.00            
ATOM   1811  HW1 HOH X 588       0.665  28.658  18.110  0.00  0.00            
ATOM   1812  HW2 HOH X 588       0.079  27.325  17.697  0.00  0.00            
ATOM   1813  OW  HOH X 589       2.882  15.305  33.669  0.00  0.00            
ATOM   1814  HW1 HOH X 589       2.808  16.253  33.566  0.00  0.00            
ATOM   1815  HW2 HOH X 589       2.060  14.960  33.318  0.00  0.00            
ATOM   1816  OW  HOH X 590      17.369  22.845  36.807  0.00  0.00            
ATOM   1817  HW1 HOH X 590      16.716  22.783  37.504  0.00  0.00            
ATOM   1818  HW2 HOH X 590      17.805  23.683  36.960  0.00  0.00            
ATOM   1819  OW  HOH X 591      25.936  16.830  25.343  0.00  0.00            
ATOM   1820  HW1 HOH X 591      26.701  17.384  25.501  0.00  0.00            
ATOM   1821  HW2 HOH X 591      26.151  15.997  25.762  0.00  0.00            
ATOM   1822  OW  HOH X 592      12.504  26.835  16.231  0.00  0.00            
ATOM   1823  HW1 HOH X 592      12.677  26.358  17.043  0.00  0.00            
ATOM   1824  HW2 HOH X 592      12.511  26.161  15.551  0.00  0.00            
ATOM   1825  OW  HOH X 593      23.093  20.615  39.057  0.00  0.00            
ATOM   1826  HW1 HOH X 593      22.827  20.785  39.961  0.00  0.00            
ATOM   1827  HW2 HOH X 593      23.989  20.948  39.004  0.00  0.00            
ATOM   1828  OW  HOH X 594       3.303  20.722  16.745  0.00  0.00            
ATOM   1829  HW1 HOH X 594       2.640  21.409  16.682  0.00  0.00            
ATOM   1830  HW2 HOH X 594       2.829  19.962  17.083  0.00  0.00            
ATOM   1831  OW  HOH X 595       1.910  13.109  27.988  0.00  0.00            
ATOM   1832  HW1 HOH X 595       2.690  13.171  27.437  0.00  0.00            
ATOM   1833  HW2 HOH X 595       2.046  12.318  28.509  0.00  0.00            
ATOM   1834  OW  HOH X 596       7.259   0.912  25.151  0.00  0.00            
ATOM   1835  HW1 HOH X 596       6.434   0.428  25.109  0.00  0.00            
ATOM   1836  HW2 HOH X 596       7.034   1.732  25.591  0.00  0.00            
ATOM   1837  OW  HOH X 597      27.694   8.272  31.182  0.00  0.00            
ATOM   1838  HW1 HOH X 597      26.846   8.699  31.305  0.00  0.00            
ATOM   1839  HW2 HOH X 597      27.485   7.341  31.108  0.00  0.00            
ATOM   1840  OW  HOH X 598      23.964   7.335   2.701  0.00  0.00            
ATOM   1841  HW1 HOH X 598      23.206   6.945   2.266  0.00  0.00            
ATOM   1842  HW2 HOH X 598      23.622   7.657   3.536  0.00  0.00            
ATOM   1843  OW  HOH X 599       5.833  26.329  24.122  0.00  0.00            
ATOM   1844  HW1 HOH X 599       5.654  26.661  23.242  0.00  0.00            
ATOM   1845  HW2 HOH X 599       6.350  25.536  23.978  0.00  0.00            
ATOM   1846  OW  HOH X 600       4.548  17.137  37.531  0.00  0.00            
ATOM   1847  HW1 HOH X 600       3.610  17.190  37.349  0.00  0.00            
ATOM   1848  HW2 HOH X 600       4.751  17.956  37.982  0.00  0.00            
ATOM   1849  OW  HOH X 601       6.319  11.264  17.060  0.00  0.00            
ATOM   1850  HW1 HOH X 601       7.211  11.586  17.189  0.00  0.00            
ATOM   1851  HW2 HOH X 601       6.428  10.343  16.821  0.00  0.00            
ATOM   1852  OW  HOH X 602       7.332  12.968  34.983  0.00  0.00            
ATOM   1853  HW1 HOH X 602       7.558  12.407  35.724  0.00  0.00            
ATOM   1854  HW2 HOH X 602       6.963  13.756  35.383  0.00  0.00            
ATOM   1855  OW  HOH X 603      22.403  15.272  10.527  0.00  0.00            
ATOM   1856  HW1 HOH X 603      21.906  16.091  10.534  0.00  0.00            
ATOM   1857  HW2 HOH X 603      21.870  14.672  10.006  0.00  0.00            
ATOM   1858  OW  HOH X 604      24.721  26.267  17.080  0.00  0.00            
ATOM   1859  HW1 HOH X 604      24.554  27.210  17.095  0.00  0.00            
ATOM   1860  HW2 HOH X 604      25.111  26.106  16.221  0.00  0.00            
ATOM   1861  OW  HOH X 605      17.493  28.546  26.572  0.00  0.00            
ATOM   1862  HW1 HOH X 605      18.229  28.500  25.962  0.00  0.00            
ATOM   1863  HW2 HOH X 605      16.864  27.907  26.238  0.00  0.00            
ATOM   1864  OW  HOH X 606      17.945  18.533  22.884  0.00  0.00            
ATOM   1865  HW1 HOH X 606      17.670  18.124  22.063  0.00  0.00            
ATOM   1866  HW2 HOH X 606      18.582  19.197  22.621  0.00  0.00            
ATOM   1867  OW  HOH X 607      25.770   2.057   7.442  0.00  0.00            
ATOM   1868  HW1 HOH X 607      26.264   1.952   6.629  0.00  0.00            
ATOM   1869  HW2 HOH X 607      24.854   2.078   7.165  0.00  0.00            
ATOM   1870  OW  HOH X 608      22.980  28.505  26.819  0.00  0.00            
ATOM   1871  HW1 HOH X 608      22.442  29.054  27.389  0.00  0.00            
ATOM   1872  HW2 HOH X 608      22.441  27.731  26.653  0.00  0.00            
ATOM   1873  OW  HOH X 609       9.666  24.521  12.300  0.00  0.00            
ATOM   1874  HW1 HOH X 609      10.436  24.100  11.917  0.00  0.00            
ATOM   1875  HW2 HOH X 609       9.983  25.374  12.598  0.00  0.00            
ATOM   1876  OW  HOH X 610      28.161  13.213  31.957  0.00  0.00            
ATOM   1877  HW1 HOH X 610      27.698  13.025  32.774  0.00  0.00            
ATOM   1878  HW2 HOH X 610      27.487  13.152  31.280  0.00  0.00            
ATOM   1879  OW  HOH X 611       8.366   4.930  19.717  0.00  0.00            
ATOM   1880  HW1 HOH X 611       9.139   4.716  19.194  0.00  0.00            
ATOM   1881  HW2 HOH X 611       7.638   4.893  19.096  0.00  0.00            
ATOM   1882  OW  HOH X 612      27.550   5.890  37.290  0.00  0.00            
ATOM   1883  HW1 HOH X 612      27.887   6.679  36.865  0.00  0.00            
ATOM   1884  HW2 HOH X 612      27.872   5.946  38.189  0.00  0.00            
ATOM   1885  OW  HOH X 613      13.034  14.100   8.617  0.00  0.00            
ATOM   1886  HW1 HOH X 613      13.258  14.183   9.544  0.00  0.00            
ATOM   1887  HW2 HOH X 613      13.868  13.920   8.184  0.00  0.00            
ATOM   1888  OW  HOH X 614      10.280   5.597  30.432  0.00  0.00            
ATOM   1889  HW1 HOH X 614      10.611   5.089  29.691  0.00  0.00            
ATOM   1890  HW2 HOH X 614       9.386   5.281  30.560  0.00  0.00            
ATOM   1891  OW  HOH X 615       3.706  26.904   9.918  0.00  0.00            
ATOM   1892  HW1 HOH X 615       4.260  26.777   9.147  0.00  0.00            
ATOM   1893  HW2 HOH X 615       4.315  26.884  10.656  0.00  0.00            
ATOM   1894  OW  HOH X 616       5.987  11.464  33.154  0.00  0.00            
ATOM   1895  HW1 HOH X 616       5.407  12.132  32.789  0.00  0.00            
ATOM   1896  HW2 HOH X 616       6.547  11.940  33.766  0.00  0.00            
ATOM   1897  OW  HOH X 617      12.183  14.871  21.225  0.00  0.00            
ATOM   1898  HW1 HOH X 617      12.274  13.960  21.502  0.00  0.00            
ATOM   1899  HW2 HOH X 617      12.849  15.343  21.725  0.00  0.00            
ATOM   1900  OW  HOH X 618       0.825   1.252   2.725  0.00  0.00            
ATOM   1901  HW1 HOH X 618       1.739   0.985   2.829  0.00  0.00            
ATOM   1902  HW2 HOH X 618       0.717   1.979   3.338  0.00  0.00            
ATOM   1903  OW  HOH X 619      18.916  18.489   0.908  0.00  0.00            
ATOM   1904  HW1 HOH X 619      18.715  17.580   0.688  0.00  0.00            
ATOM   1905  HW2 HOH X 619      19.453  18.432   1.698  0.00  0.00            
ATOM   1906  OW  HOH X 620      15.640  10.103   8.856  0.00  0.00            
ATOM   1907  HW1 HOH X 620      16.331   9.449   8.962  0.00  0.00            
ATOM   1908  HW2 HOH X 620      14.923   9.786   9.405  0.00  0.00            
ATOM   1909  OW  HOH X 621       4.481   4.545   5.127  0.00  0.00            
ATOM   1910  HW1 HOH X 621       4.198   4.198   5.973  0.00  0.00            
ATOM   1911  HW2 HOH X 621       3.930   4.095   4.487  0.00  0.00            
ATOM   1912  OW  HOH X 622      13.156   7.764   8.470  0.00  0.00            
ATOM   1913  HW1 HOH X 622      14.047   7.448   8.622  0.00  0.00            
ATOM   1914  HW2 HOH X 622      12.885   8.132   9.311  0.00  0.00            
ATOM   1915  OW  HOH X 623       0.388   3.131  37.045  0.00  0.00            
ATOM   1916  HW1 HOH X 623      -0.112   3.694  36.455  0.00  0.00            
ATOM   1917  HW2 HOH X 623       0.334   3.566  37.896  0.00  0.00            
ATOM   1918  OW  HOH X 624       1.812  13.769  24.478  0.00  0.00            
ATOM   1919  HW1 HOH X 624       2.395  13.100  24.834  0.00  0.00            
ATOM   1920  HW2 HOH X 624       2.377  14.528  24.332  0.00  0.00            
ATOM   1921  OW  HOH X 625      17.824  21.790  23.523  0.00  0.00            
ATOM   1922  HW1 HOH X 625      18.165  22.684  23.517  0.00  0.00            
ATOM   1923  HW2 HOH X 625      18.229  21.384  24.289  0.00  0.00            
ATOM   1924  OW  HOH X 626      23.750  11.223  32.118  0.00  0.00            
ATOM   1925  HW1 HOH X 626      23.396  10.690  31.405  0.00  0.00            
ATOM   1926  HW2 HOH X 626      23.363  10.851  32.910  0.00  0.00            
ATOM   1927  OW  HOH X 627       9.081   4.771  37.869  0.00  0.00            
ATOM   1928  HW1 HOH X 627       9.266   4.061  37.255  0.00  0.00            
ATOM   1929  HW2 HOH X 627       9.938   5.014  38.220  0.00  0.00            
ATOM   1930  OW  HOH X 628      25.485  16.721  22.567  0.00  0.00            
ATOM   1931  HW1 HOH X 628      25.584  16.545  23.502  0.00  0.00            
ATOM   1932  HW2 HOH X 628      25.474  17.676  22.502  0.00  0.00            
ATOM   1933  OW  HOH X 629      20.605   3.748   0.701  0.00  0.00            
ATOM   1934  HW1 HOH X 629      20.294   3.044   1.271  0.00  0.00            
ATOM   1935  HW2 HOH X 629      19.837   4.301   0.562  0.00  0.00            
ATOM   1936  OW  HOH X 630      28.634  21.972  39.444  0.00  0.00            
ATOM   1937  HW1 HOH X 630      28.664  22.833  39.862  0.00  0.00            
ATOM   1938  HW2 HOH X 630      29.104  22.090  38.618  0.00  0.00            
ATOM   1939  OW  HOH X 631      23.147   8.951  24.602  0.00  0.00            
ATOM   1940  HW1 HOH X 631      22.234   8.835  24.863  0.00  0.00            
ATOM   1941  HW2 HOH X 631      23.514   9.535  25.266  0.00  0.00            
ATOM   1942  OW  HOH X 632      29.852  17.770  20.032  0.00  0.00            
ATOM   1943  HW1 HOH X 632      29.231  18.287  20.546  0.00  0.00            
ATOM   1944  HW2 HOH X 632      30.359  17.287  20.684  0.00  0.00            
ATOM   1945  OW  HOH X 633      13.382  18.104   1.255  0.00  0.00            
ATOM   1946  HW1 HOH X 633      13.277  17.206   0.941  0.00  0.00            
ATOM   1947  HW2 HOH X 633      12.534  18.324   1.641  0.00  0.00            
ATOM   1948  OW  HOH X 634       0.385  24.054  30.797  0.00  0.00            
ATOM   1949  HW1 HOH X 634       0.659  23.447  30.109  0.00  0.00            
ATOM   1950  HW2 HOH X 634       0.574  24.922  30.440  0.00  0.00            
ATOM   1951  OW  HOH X 635      30.124   5.454  15.556  0.00  0.00            
ATOM   1952  HW1 HOH X 635      29.515   5.788  16.214  0.00  0.00            
ATOM   1953  HW2 HOH X 635      29.974   4.509  15.547  0.00  0.00            
ATOM   1954  OW  HOH X 636      17.176  20.478  27.830  0.00  0.00            
ATOM   1955  HW1 HOH X 636      17.759  20.183  28.530  0.00  0.00            
ATOM   1956  HW2 HOH X 636      16.963  21.383  28.060  0.00  0.00            
ATOM   1957  OW  HOH X 637       2.705  21.146  33.010  0.00  0.00            
ATOM   1958  HW1 HOH X 637       3.516  21.650  33.076  0.00  0.00            
ATOM   1959  HW2 HOH X 637       2.077  21.754  32.620  0.00  0.00            
ATOM   1960  OW  HOH X 638      17.928  15.988  24.795  0.00  0.00            
ATOM   1961  HW1 HOH X 638      17.610  16.655  24.186  0.00  0.00            
ATOM   1962  HW2 HOH X 638      18.878  15.983  24.671  0.00  0.00            
ATOM   1963  OW  HOH X 639      18.380  13.015  27.598  0.00  0.00            
ATOM   1964  HW1 HOH X 639      19.195  13.022  27.095  0.00  0.00            
ATOM   1965  HW2 HOH X 639      17.834  13.681  27.180  0.00  0.00            
ATOM   1966  OW  HOH X 640      29.838  20.345   8.950  0.00  0.00            
ATOM   1967  HW1 HOH X 640      29.159  19.730   8.671  0.00  0.00            
ATOM   1968  HW2 HOH X 640      29.508  20.711   9.771  0.00  0.00            
ATOM   1969  OW  HOH X 641      28.093   0.740   2.142  0.00  0.00            
ATOM   1970  HW1 HOH X 641      28.853   0.946   2.686  0.00  0.00            
ATOM   1971  HW2 HOH X 641      27.521   0.227   2.713  0.00  0.00            
ATOM   1972  OW  HOH X 642       6.323  24.847  19.684  0.00  0.00            
ATOM   1973  HW1 HOH X 642       5.806  25.474  19.178  0.00  0.00            
ATOM   1974  HW2 HOH X 642       7.227  25.145  19.584  0.00  0.00            
ATOM   1975  OW  HOH X 643       1.702  27.118  30.901  0.00  0.00            
ATOM   1976  HW1 HOH X 643       0.826  26.898  30.585  0.00  0.00            
ATOM   1977  HW2 HOH X 643       2.221  27.236  30.106  0.00  0.00            
ATOM   1978  OW  HOH X 644      24.414  23.075  17.378  0.00  0.00            
ATOM   1979  HW1 HOH X 644      24.743  22.321  16.888  0.00  0.00            
ATOM   1980  HW2 HOH X 644      25.045  23.772  17.197  0.00  0.00            
ATOM   1981  OW  HOH X 645      22.504   3.877  24.084  0.00  0.00            
ATOM   1982  HW1 HOH X 645      22.416   2.929  24.180  0.00  0.00            
ATOM   1983  HW2 HOH X 645      23.449   4.031  24.080  0.00  0.00            
ATOM   1984  OW  HOH X 646      29.152  16.377   4.807  0.00  0.00            
ATOM   1985  HW1 HOH X 646      29.520  15.496   4.881  0.00  0.00            
ATOM   1986  HW2 HOH X 646      29.044  16.514   3.866  0.00  0.00            
ATOM   1987  OW  HOH X 647      29.313   3.575  32.137  0.00  0.00            
ATOM   1988  HW1 HOH X 647      28.969   2.787  32.556  0.00  0.00            
ATOM   1989  HW2 HOH X 647      29.791   4.027  32.832  0.00  0.00            
ATOM   1990  OW  HOH X 648       7.607  23.505   6.942  0.00  0.00            
ATOM   1991  HW1 HOH X 648       7.195  22.798   7.438  0.00  0.00            
ATOM   1992  HW2 HOH X 648       7.468  23.269   6.025  0.00  0.00            
ATOM   1993  OW  HOH X 649      26.059  21.177  38.930  0.00  0.00            
ATOM   1994  HW1 HOH X 649      26.228  21.019  38.002  0.00  0.00            
ATOM   1995  HW2 HOH X 649      26.907  21.443  39.286  0.00  0.00            
ATOM   1996  OW  HOH X 650      18.977  13.899  14.602  0.00  0.00            
ATOM   1997  HW1 HOH X 650      19.039  13.027  14.212  0.00  0.00            
ATOM   1998  HW2 HOH X 650      19.663  14.406  14.167  0.00  0.00            
ATOM   1999  OW  HOH X 651      14.557   5.668  14.101  0.00  0.00            
ATOM   2000  HW1 HOH X 651      14.210   5.522  14.981  0.00  0.00            
ATOM   2001  HW2 HOH X 651      13.947   6.289  13.702  0.00  0.00            
ATOM   2002  OW  HOH X 652      16.897   1.440  31.411  0.00  0.00            
ATOM   2003  HW1 HOH X 652      16.582   0.702  31.933  0.00  0.00            
ATOM   2004  HW2 HOH X 652      17.430   1.953  32.018  0.00  0.00            
ATOM   2005  OW  HOH X 653      12.384  28.897  24.951  0.00  0.00            
ATOM   2006  HW1 HOH X 653      11.639  29.487  24.840  0.00  0.00            
ATOM   2007  HW2 HOH X 653      12.037  28.166  25.463  0.00  0.00            
ATOM   2008  OW  HOH X 654      14.254  18.338  24.574  0.00  0.00            
ATOM   2009  HW1 HOH X 654      14.607  19.160  24.234  0.00  0.00            
ATOM   2010  HW2 HOH X 654      14.750  18.177  25.377  0.00  0.00            
ATOM   2011  OW  HOH X 655       8.128  19.653  17.946  0.00  0.00            
ATOM   2012  HW1 HOH X 655       9.044  19.379  17.986  0.00  0.00            
ATOM   2013  HW2 HOH X 655       7.924  19.942  18.836  0.00  0.00            
ATOM   2014  OW  HOH X 656      24.712  19.365  23.600  0.00  0.00            
ATOM   2015  HW1 HOH X 656      25.480  19.393  24.170  0.00  0.00            
ATOM   2016  HW2 HOH X 656      24.456  20.281  23.495  0.00  0.00            
ATOM   2017  OW  HOH X 657      21.959  26.135  22.292  0.00  0.00            
ATOM   2018  HW1 HOH X 657      21.538  25.346  21.952  0.00  0.00            
ATOM   2019  HW2 HOH X 657      22.805  25.832  22.621  0.00  0.00            
ATOM   2020  OW  HOH X 658      12.714   6.620  18.890  0.00  0.00            
ATOM   2021  HW1 HOH X 658      13.081   6.044  19.561  0.00  0.00            
ATOM   2022  HW2 HOH X 658      12.715   7.488  19.293  0.00  0.00            
ATOM   2023  OW  HOH X 659       2.175  15.588  19.405  0.00  0.00            
ATOM   2024  HW1 HOH X 659       1.525  15.119  18.882  0.00  0.00            
ATOM   2025  HW2 HOH X 659       1.743  15.737  20.246  0.00  0.00            
ATOM   2026  OW  HOH X 660       2.757  10.877  38.524  0.00  0.00            
ATOM   2027  HW1 HOH X 660       2.303  10.324  37.888  0.00  0.00            
ATOM   2028  HW2 HOH X 660       2.276  11.705  38.509  0.00  0.00            
ATOM   2029  OW  HOH X 661      11.589  14.712  15.677  0.00  0.00            
ATOM   2030  HW1 HOH X 661      11.295  15.083  16.509  0.00  0.00            
ATOM   2031  HW2 HOH X 661      11.037  15.133  15.018  0.00  0.00            
ATOM   2032  OW  HOH X 662      10.229   9.996  10.386  0.00  0.00            
ATOM   2033  HW1 HOH X 662       9.296   9.938  10.181  0.00  0.00            
ATOM   2034  HW2 HOH X 662      10.319   9.544  11.225  0.00  0.00            
ATOM   2035  OW  HOH X 663       3.240   2.487  39.123  0.00  0.00            
ATOM   2036  HW1 HOH X 663       3.795   1.707  39.133  0.00  0.00            
ATOM   2037  HW2 HOH X 663       2.355   2.154  39.266  0.00  0.00            
ATOM   2038  OW  HOH X 664       6.843  21.663  13.841  0.00  0.00            
ATOM   2039  HW1 HOH X 664       7.584  21.702  14.445  0.00  0.00            
ATOM   2040  HW2 HOH X 664       6.703  22.571  13.574  0.00  0.00            
ATOM   2041  OW  HOH X 665       7.102   5.278   5.205  0.00  0.00            
ATOM   2042  HW1 HOH X 665       7.717   4.546   5.161  0.00  0.00            
ATOM   2043  HW2 HOH X 665       6.247   4.866   5.334  0.00  0.00            
ATOM   2044  OW  HOH X 666      11.580  15.542   3.606  0.00  0.00            
ATOM   2045  HW1 HOH X 666      11.971  15.629   2.737  0.00  0.00            
ATOM   2046  HW2 HOH X 666      11.634  14.606   3.801  0.00  0.00            
ATOM   2047  OW  HOH X 667       4.473   4.810   1.949  0.00  0.00            
ATOM   2048  HW1 HOH X 667       4.267   5.175   1.089  0.00  0.00            
ATOM   2049  HW2 HOH X 667       4.857   3.954   1.761  0.00  0.00            
ATOM   2050  OW  HOH X 668      13.157  10.925   2.974  0.00  0.00            
ATOM   2051  HW1 HOH X 668      12.614  10.165   3.187  0.00  0.00            
ATOM   2052  HW2 HOH X 668      13.299  10.861   2.030  0.00  0.00            
ATOM   2053  OW  HOH X 669      -0.212  29.363   5.652  0.00  0.00            
ATOM   2054  HW1 HOH X 669       0.412  28.994   6.277  0.00  0.00            
ATOM   2055  HW2 HOH X 669       0.228  29.294   4.805  0.00  0.00            
ATOM   2056  OW  HOH X 670      23.614  16.145  33.514  0.00  0.00            
ATOM   2057  HW1 HOH X 670      23.768  15.621  32.728  0.00  0.00            
ATOM   2058  HW2 HOH X 670      22.669  16.297  33.519  0.00  0.00            
ATOM   2059  OW  HOH X 671      28.512  17.987  37.482  0.00  0.00            
ATOM   2060  HW1 HOH X 671      28.572  18.811  37.000  0.00  0.00            
ATOM   2061  HW2 HOH X 671      29.357  17.905  37.924  0.00  0.00            
ATOM   2062  OW  HOH X 672      12.232  22.756  18.620  0.00  0.00            
ATOM   2063  HW1 HOH X 672      12.619  22.263  17.897  0.00  0.00            
ATOM   2064  HW2 HOH X 672      11.289  22.629  18.521  0.00  0.00            
ATOM   2065  OW  HOH X 673      19.270  12.350  39.071  0.00  0.00            
ATOM   2066  HW1 HOH X 673      19.854  11.684  38.707  0.00  0.00            
ATOM   2067  HW2 HOH X 673      19.463  13.140  38.565  0.00  0.00            
ATOM   2068  OW  HOH X 674      29.036   9.038   6.800  0.00  0.00            
ATOM   2069  HW1 HOH X 674      29.046   8.940   5.847  0.00  0.00            
ATOM   2070  HW2 HOH X 674      28.734   8.190   7.125  0.00  0.00            
ATOM   2071  OW  HOH X 675      26.618  20.532  33.798  0.00  0.00            
ATOM   2072  HW1 HOH X 675      25.972  19.865  33.566  0.00  0.00            
ATOM   2073  HW2 HOH X 675      26.112  21.215  34.238  0.00  0.00            
ATOM   2074  OW  HOH X 676       6.769  12.862  38.603  0.00  0.00            
ATOM   2075  HW1 HOH X 676       7.414  13.507  38.311  0.00  0.00            
ATOM   2076  HW2 HOH X 676       7.225  12.355  39.275  0.00  0.00            
ATOM   2077  OW  HOH X 677      23.363  15.717  25.326  0.00  0.00            
ATOM   2078  HW1 HOH X 677      23.546  14.940  24.798  0.00  0.00            
ATOM   2079  HW2 HOH X 677      24.202  16.176  25.375  0.00  0.00            
ATOM   2080  OW  HOH X 678      19.771  14.326  22.573  0.00  0.00            
ATOM   2081  HW1 HOH X 678      20.530  14.687  22.116  0.00  0.00            
ATOM   2082  HW2 HOH X 678      20.039  14.286  23.491  0.00  0.00            
ATOM   2083  OW  HOH X 679      22.840  24.343   8.375  0.00  0.00            
ATOM   2084  HW1 HOH X 679      22.624  23.999   9.242  0.00  0.00            
ATOM   2085  HW2 HOH X 679      23.665  23.916   8.146  0.00  0.00            
ATOM   2086  OW  HOH X 680      17.659  25.618  21.961  0.00  0.00            
ATOM   2087  HW1 HOH X 680      16.875  25.069  21.964  0.00  0.00            
ATOM   2088  HW2 HOH X 680      18.290  25.138  22.497  0.00  0.00            
ATOM   2089  OW  HOH X 681      12.107   9.860  36.352  0.00  0.00            
ATOM   2090  HW1 HOH X 681      12.221   9.296  35.587  0.00  0.00            
ATOM   2091  HW2 HOH X 681      12.999  10.079  36.624  0.00  0.00            
ATOM   2092  OW  HOH X 682       5.278   5.725  15.295  0.00  0.00            
ATOM   2093  HW1 HOH X 682       4.560   5.679  15.926  0.00  0.00            
ATOM   2094  HW2 HOH X 682       5.027   6.429  14.696  0.00  0.00            
ATOM   2095  OW  HOH X 683      27.280  13.167  19.427  0.00  0.00            
ATOM   2096  HW1 HOH X 683      27.320  13.989  19.916  0.00  0.00            
ATOM   2097  HW2 HOH X 683      28.139  12.767  19.560  0.00  0.00            
ATOM   2098  OW  HOH X 684       7.630  25.642   2.169  0.00  0.00            
ATOM   2099  HW1 HOH X 684       7.812  24.702   2.182  0.00  0.00            
ATOM   2100  HW2 HOH X 684       8.471  26.052   2.372  0.00  0.00            
ATOM   2101  OW  HOH X 685       8.329  18.353  21.896  0.00  0.00            
ATOM   2102  HW1 HOH X 685       9.042  18.374  21.258  0.00  0.00            
ATOM   2103  HW2 HOH X 685       8.766  18.249  22.741  0.00  0.00            
ATOM   2104  OW  HOH X 686      14.862  10.464   0.671  0.00  0.00            
ATOM   2105  HW1 HOH X 686      15.120  11.366   0.862  0.00  0.00            
ATOM   2106  HW2 HOH X 686      15.688   9.982   0.630  0.00  0.00            
ATOM   2107  OW  HOH X 687       2.291   8.848   0.522  0.00  0.00            
ATOM   2108  HW1 HOH X 687       2.616   9.467  -0.132  0.00  0.00            
ATOM   2109  HW2 HOH X 687       2.618   9.187   1.356  0.00  0.00            
ATOM   2110  OW  HOH X 688      19.761  14.794  38.031  0.00  0.00            
ATOM   2111  HW1 HOH X 688      20.602  14.405  37.790  0.00  0.00            
ATOM   2112  HW2 HOH X 688      19.672  15.551  37.451  0.00  0.00            
ATOM   2113  OW  HOH X 689      26.866  15.913  12.773  0.00  0.00            
ATOM   2114  HW1 HOH X 689      26.640  15.628  11.887  0.00  0.00            
ATOM   2115  HW2 HOH X 689      27.354  15.179  13.145  0.00  0.00            
ATOM   2116  OW  HOH X 690      11.115  24.795  33.805  0.00  0.00            
ATOM   2117  HW1 HOH X 690      10.630  24.977  34.610  0.00  0.00            
ATOM   2118  HW2 HOH X 690      10.901  23.886  33.596  0.00  0.00            
ATOM   2119  OW  HOH X 691       5.106  12.785  27.673  0.00  0.00            
ATOM   2120  HW1 HOH X 691       5.058  12.142  28.380  0.00  0.00            
ATOM   2121  HW2 HOH X 691       5.768  13.413  27.964  0.00  0.00            
ATOM   2122  OW  HOH X 692      15.225  25.281  16.631  0.00  0.00            
ATOM   2123  HW1 HOH X 692      14.600  25.166  15.916  0.00  0.00            
ATOM   2124  HW2 HOH X 692      14.682  25.481  17.394  0.00  0.00            
ATOM   2125  OW  HOH X 693      29.046  16.286  23.856  0.00  0.00            
ATOM   2126  HW1 HOH X 693      28.853  15.410  24.190  0.00  0.00            
ATOM   2127  HW2 HOH X 693      28.665  16.879  24.505  0.00  0.00            
ATOM   2128  OW  HOH X 694       9.943  11.648  23.004  0.00  0.00            
ATOM   2129  HW1 HOH X 694      10.471  11.575  23.799  0.00  0.00            
ATOM   2130  HW2 HOH X 694      10.582  11.641  22.291  0.00  0.00            
ATOM   2131  OW  HOH X 695      28.324   0.908  24.533  0.00  0.00            
ATOM   2132  HW1 HOH X 695      27.492   0.836  25.001  0.00  0.00            
ATOM   2133  HW2 HOH X 695      28.916   1.326  25.158  0.00  0.00            
ATOM   2134  OW  HOH X 696       3.066  28.861   5.598  0.00  0.00            
ATOM   2135  HW1 HOH X 696       3.796  28.253   5.481  0.00  0.00            
ATOM   2136  HW2 HOH X 696       2.582  28.815   4.774  0.00  0.00            
ATOM   2137  OW  HOH X 697      13.289   1.980   1.689  0.00  0.00            
ATOM   2138  HW1 HOH X 697      12.921   1.471   2.411  0.00  0.00            
ATOM   2139  HW2 HOH X 697      14.208   1.713   1.651  0.00  0.00            
ATOM   2140  OW  HOH X 698      14.230  14.928  32.403  0.00  0.00            
ATOM   2141  HW1 HOH X 698      13.390  14.470  32.372  0.00  0.00            
ATOM   2142  HW2 HOH X 698      14.594  14.821  31.524  0.00  0.00            
ATOM   2143  OW  HOH X 699      12.235  16.917  25.950  0.00  0.00            
ATOM   2144  HW1 HOH X 699      12.751  17.665  25.649  0.00  0.00            
ATOM   2145  HW2 HOH X 699      11.417  16.975  25.456  0.00  0.00            
ATOM   2146  OW  HOH X 700      21.372  12.007  22.384  0.00  0.00            
ATOM   2147  HW1 HOH X 700      20.944  12.847  22.217  0.00  0.00            
ATOM   2148  HW2 HOH X 700      20.654  11.375  22.417  0.00  0.00            
ATOM   2149  OW  HOH X 701      27.819   0.569  27.690  0.00  0.00            
ATOM   2150  HW1 HOH X 701      28.566   1.057  27.345  0.00  0.00            
ATOM   2151  HW2 HOH X 701      27.968   0.537  28.635  0.00  0.00            
ATOM   2152  OW  HOH X 702      20.519   0.368  32.110  0.00  0.00            
ATOM   2153  HW1 HOH X 702      20.645  -0.128  32.919  0.00  0.00            
ATOM   2154  HW2 HOH X 702      21.226   1.013  32.112  0.00  0.00            
ATOM   2155  OW  HOH X 703      28.530  20.821   2.405  0.00  0.00            
ATOM   2156  HW1 HOH X 703      28.208  21.576   1.913  0.00  0.00            
ATOM   2157  HW2 HOH X 703      28.900  20.240   1.740  0.00  0.00            
ATOM   2158  OW  HOH X 704      27.253  29.150  21.201  0.00  0.00            
ATOM   2159  HW1 HOH X 704      27.569  28.435  21.754  0.00  0.00            
ATOM   2160  HW2 HOH X 704      27.457  28.871  20.309  0.00  0.00            
ATOM   2161  OW  HOH X 705      22.137  15.144  21.594  0.00  0.00            
ATOM   2162  HW1 HOH X 705      23.076  15.081  21.768  0.00  0.00            
ATOM   2163  HW2 HOH X 705      22.081  15.503  20.709  0.00  0.00            
ATOM   2164  OW  HOH X 706      17.432  14.198  19.102  0.00  0.00            
ATOM   2165  HW1 HOH X 706      16.811  14.922  19.179  0.00  0.00            
ATOM   2166  HW2 HOH X 706      17.884  14.357  18.273  0.00  0.00            
ATOM   2167  OW  HOH X 707      29.448   8.724  37.661  0.00  0.00            
ATOM   2168  HW1 HOH X 707      28.994   8.611  36.826  0.00  0.00            
ATOM   2169  HW2 HOH X 707      30.229   8.175  37.586  0.00  0.00            
ATOM   2170  OW  HOH X 708      20.443  17.726   3.245  0.00  0.00            
ATOM   2171  HW1 HOH X 708      20.354  18.193   4.076  0.00  0.00            
ATOM   2172  HW2 HOH X 708      21.191  18.140   2.816  0.00  0.00            
ATOM   2173  OW  HOH X 709      11.923  22.829  37.625  0.00  0.00            
ATOM   2174  HW1 HOH X 709      11.956  21.994  38.092  0.00  0.00            
ATOM   2175  HW2 HOH X 709      12.085  23.488  38.301  0.00  0.00            
ATOM   2176  OW  HOH X 710      12.916   5.500  16.490  0.00  0.00            
ATOM   2177  HW1 HOH X 710      13.370   4.742  16.859  0.00  0.00            
ATOM   2178  HW2 HOH X 710      12.626   6.001  17.252  0.00  0.00            
ATOM   2179  OW  HOH X 711      17.806  15.700   5.490  0.00  0.00            
ATOM   2180  HW1 HOH X 711      18.275  16.048   6.248  0.00  0.00            
ATOM   2181  HW2 HOH X 711      16.880  15.801   5.713  0.00  0.00            
ATOM   2182  OW  HOH X 712      24.627   3.498   3.643  0.00  0.00            
ATOM   2183  HW1 HOH X 712      24.876   3.818   2.776  0.00  0.00            
ATOM   2184  HW2 HOH X 712      23.680   3.369   3.589  0.00  0.00            
ATOM   2185  OW  HOH X 713      19.713  21.463  37.043  0.00  0.00            
ATOM   2186  HW1 HOH X 713      19.772  20.520  37.194  0.00  0.00            
ATOM   2187  HW2 HOH X 713      18.774  21.640  36.992  0.00  0.00            
ATOM   2188  OW  HOH X 714      16.796   3.905  10.733  0.00  0.00            
ATOM   2189  HW1 HOH X 714      16.389   3.375  10.048  0.00  0.00            
ATOM   2190  HW2 HOH X 714      16.316   3.677  11.529  0.00  0.00            
ATOM   2191  OW  HOH X 715      28.089  28.534   0.090  0.00  0.00            
ATOM   2192  HW1 HOH X 715      27.784  29.348   0.488  0.00  0.00            
ATOM   2193  HW2 HOH X 715      27.388  28.284  -0.512  0.00  0.00            
ATOM   2194  OW  HOH X 716       7.753  20.733  11.313  0.00  0.00            
ATOM   2195  HW1 HOH X 716       7.496  20.802  12.233  0.00  0.00            
ATOM   2196  HW2 HOH X 716       8.707  20.808  11.325  0.00  0.00            
ATOM   2197  OW  HOH X 717       8.279   6.535  21.933  0.00  0.00            
ATOM   2198  HW1 HOH X 717       8.234   5.946  21.180  0.00  0.00            
ATOM   2199  HW2 HOH X 717       9.015   7.116  21.740  0.00  0.00            
ATOM   2200  OW  HOH X 718       0.550  22.510  28.475  0.00  0.00            
ATOM   2201  HW1 HOH X 718       1.321  22.532  27.907  0.00  0.00            
ATOM   2202  HW2 HOH X 718      -0.190  22.431  27.873  0.00  0.00            
ATOM   2203  OW  HOH X 719       1.556   5.467   6.066  0.00  0.00            
ATOM   2204  HW1 HOH X 719       0.720   5.243   5.659  0.00  0.00            
ATOM   2205  HW2 HOH X 719       2.181   4.849   5.686  0.00  0.00            
ATOM   2206  OW  HOH X 720       4.472   8.074  13.889  0.00  0.00            
ATOM   2207  HW1 HOH X 720       3.847   7.888  13.188  0.00  0.00            
ATOM   2208  HW2 HOH X 720       4.950   8.846  13.585  0.00  0.00            
ATOM   2209  OW  HOH X 721       8.512   3.721   2.588  0.00  0.00            
ATOM   2210  HW1 HOH X 721       8.638   3.020   3.227  0.00  0.00            
ATOM   2211  HW2 HOH X 721       7.646   3.554   2.216  0.00  0.00            
ATOM   2212  OW  HOH X 722      22.948  22.792  10.812  0.00  0.00            
ATOM   2213  HW1 HOH X 722      23.885  22.597  10.790  0.00  0.00            
ATOM   2214  HW2 HOH X 722      22.559  22.047  11.270  0.00  0.00            
ATOM   2215  OW  HOH X 723       3.443  21.174  14.105  0.00  0.00            
ATOM   2216  HW1 HOH X 723       3.456  20.750  14.963  0.00  0.00            
ATOM   2217  HW2 HOH X 723       4.253  21.683  14.076  0.00  0.00            
ATOM   2218  OW  HOH X 724       7.245  13.052   8.228  0.00  0.00            
ATOM   2219  HW1 HOH X 724       6.338  12.959   7.938  0.00  0.00            
ATOM   2220  HW2 HOH X 724       7.757  12.578   7.572  0.00  0.00            
ATOM   2221  OW  HOH X 725      20.142   4.074  13.646  0.00  0.00            
ATOM   2222  HW1 HOH X 725      20.624   3.632  12.946  0.00  0.00            
ATOM   2223  HW2 HOH X 725      19.535   3.411  13.974  0.00  0.00            
ATOM   2224  OW  HOH X 726      17.101  27.385  18.637  0.00  0.00            
ATOM   2225  HW1 HOH X 726      16.967  27.397  19.585  0.00  0.00            
ATOM   2226  HW2 HOH X 726      16.307  27.780  18.278  0.00  0.00            
ATOM   2227  OW  HOH X 727      11.397  27.681  31.285  0.00  0.00            
ATOM   2228  HW1 HOH X 727      11.155  27.405  30.401  0.00  0.00            
ATOM   2229  HW2 HOH X 727      10.585  28.018  31.662  0.00  0.00            
ATOM   2230  OW  HOH X 728      17.407  28.916  11.429  0.00  0.00            
ATOM   2231  HW1 HOH X 728      16.698  28.281  11.326  0.00  0.00            
ATOM   2232  HW2 HOH X 728      17.546  28.969  12.375  0.00  0.00            
ATOM   2233  OW  HOH X 729       9.005  12.839  10.632  0.00  0.00            
ATOM   2234  HW1 HOH X 729       8.745  12.981   9.722  0.00  0.00            
ATOM   2235  HW2 HOH X 729       9.458  11.995  10.622  0.00  0.00            
ATOM   2236  OW  HOH X 730       2.380  13.461  11.956  0.00  0.00            
ATOM   2237  HW1 HOH X 730       2.252  12.649  12.446  0.00  0.00            
ATOM   2238  HW2 HOH X 730       1.679  14.038  12.259  0.00  0.00            
ATOM   2239  OW  HOH X 731      14.524  28.563  17.730  0.00  0.00            
ATOM   2240  HW1 HOH X 731      14.667  29.112  16.960  0.00  0.00            
ATOM   2241  HW2 HOH X 731      13.692  28.122  17.560  0.00  0.00            
ATOM   2242  OW  HOH X 732      27.132  10.597  14.722  0.00  0.00            
ATOM   2243  HW1 HOH X 732      26.199  10.388  14.766  0.00  0.00            
ATOM   2244  HW2 HOH X 732      27.261  11.260  15.401  0.00  0.00            
ATOM   2245  OW  HOH X 733      20.063  21.320  20.100  0.00  0.00            
ATOM   2246  HW1 HOH X 733      19.757  21.083  19.225  0.00  0.00            
ATOM   2247  HW2 HOH X 733      20.416  20.506  20.459  0.00  0.00            
ATOM   2248  OW  HOH X 734       8.449   4.432  34.783  0.00  0.00            
ATOM   2249  HW1 HOH X 734       8.966   5.200  35.027  0.00  0.00            
ATOM   2250  HW2 HOH X 734       8.966   3.687  35.093  0.00  0.00            
ATOM   2251  OW  HOH X 735      23.346  15.027   3.711  0.00  0.00            
ATOM   2252  HW1 HOH X 735      23.312  14.199   3.232  0.00  0.00            
ATOM   2253  HW2 HOH X 735      23.867  15.605   3.154  0.00  0.00            
ATOM   2254  OW  HOH X 736       6.949  24.509  13.367  0.00  0.00            
ATOM   2255  HW1 HOH X 736       7.869  24.653  13.146  0.00  0.00            
ATOM   2256  HW2 HOH X 736       6.662  25.338  13.751  0.00  0.00            
ATOM   2257  OW  HOH X 737      22.533  14.383  37.874  0.00  0.00            
ATOM   2258  HW1 HOH X 737      23.309  14.757  37.456  0.00  0.00            
ATOM   2259  HW2 HOH X 737      22.859  13.614  38.341  0.00  0.00            
ATOM   2260  OW  HOH X 738       8.411   2.800   5.423  0.00  0.00            
ATOM   2261  HW1 HOH X 738       8.469   2.030   5.988  0.00  0.00            
ATOM   2262  HW2 HOH X 738       9.318   3.082   5.308  0.00  0.00            
ATOM   2263  OW  HOH X 739      28.618  16.924  26.657  0.00  0.00            
ATOM   2264  HW1 HOH X 739      27.939  16.982  27.329  0.00  0.00            
ATOM   2265  HW2 HOH X 739      29.324  16.428  27.071  0.00  0.00            
ATOM   2266  OW  HOH X 740      27.092  28.748   5.830  0.00  0.00            
ATOM   2267  HW1 HOH X 740      27.979  29.100   5.900  0.00  0.00            
ATOM   2268  HW2 HOH X 740      27.025  28.121   6.550  0.00  0.00            
ATOM   2269  OW  HOH X 741       0.734   4.945  30.233  0.00  0.00            
ATOM   2270  HW1 HOH X 741       0.164   5.442  29.646  0.00  0.00            
ATOM   2271  HW2 HOH X 741       0.134   4.444  30.784  0.00  0.00            
ATOM   2272  OW  HOH X 742      13.643   6.856  37.331  0.00  0.00            
ATOM   2273  HW1 HOH X 742      13.036   6.747  36.598  0.00  0.00            
ATOM   2274  HW2 HOH X 742      14.070   7.696  37.166  0.00  0.00            
ATOM   2275  OW  HOH X 743      22.406   1.040  24.120  0.00  0.00            
ATOM   2276  HW1 HOH X 743      22.023   1.235  23.264  0.00  0.00            
ATOM   2277  HW2 HOH X 743      22.489   0.086  24.133  0.00  0.00            
ATOM   2278  OW  HOH X 744      29.139   5.525   2.279  0.00  0.00            
ATOM   2279  HW1 HOH X 744      29.131   4.964   3.055  0.00  0.00            
ATOM   2280  HW2 HOH X 744      29.626   6.303   2.550  0.00  0.00            
ATOM   2281  OW  HOH X 745      23.289  22.849   1.413  0.00  0.00            
ATOM   2282  HW1 HOH X 745      22.940  23.553   1.959  0.00  0.00            
ATOM   2283  HW2 HOH X 745      23.576  22.181   2.037  0.00  0.00            
ATOM   2284  OW  HOH X 746      23.353  12.088  25.967  0.00  0.00            
ATOM   2285  HW1 HOH X 746      23.390  12.597  25.156  0.00  0.00            
ATOM   2286  HW2 HOH X 746      24.184  12.274  26.405  0.00  0.00            
ATOM   2287  OW  HOH X 747       0.553   3.521  18.945  0.00  0.00            
ATOM   2288  HW1 HOH X 747       0.557   2.898  19.671  0.00  0.00            
ATOM   2289  HW2 HOH X 747       1.325   4.067  19.093  0.00  0.00            
ATOM   2290  OW  HOH X 748      19.285   2.029  37.275  0.00  0.00            
ATOM   2291  HW1 HOH X 748      18.547   1.815  36.704  0.00  0.00            
ATOM   2292  HW2 HOH X 748      19.123   2.932  37.549  0.00  0.00            
ATOM   2293  OW  HOH X 749       0.397  14.044  16.392  0.00  0.00            
ATOM   2294  HW1 HOH X 749       0.195  14.849  16.869  0.00  0.00            
ATOM   2295  HW2 HOH X 749       0.727  14.344  15.545  0.00  0.00            
ATOM   2296  OW  HOH X 750      11.981  26.118  26.149  0.00  0.00            
ATOM   2297  HW1 HOH X 750      11.473  25.307  26.116  0.00  0.00            
ATOM   2298  HW2 HOH X 750      12.806  25.903  25.713  0.00  0.00            
ATOM   2299  OW  HOH X 751      23.302   1.811  29.860  0.00  0.00            
ATOM   2300  HW1 HOH X 751      23.909   1.310  30.406  0.00  0.00            
ATOM   2301  HW2 HOH X 751      23.210   2.650  30.311  0.00  0.00            
ATOM   2302  OW  HOH X 752      20.669   0.933  35.321  0.00  0.00            
ATOM   2303  HW1 HOH X 752      20.196   1.213  36.104  0.00  0.00            
ATOM   2304  HW2 HOH X 752      20.637   1.691  34.737  0.00  0.00            
ATOM   2305  OW  HOH X 753      13.068  10.259  18.566  0.00  0.00            
ATOM   2306  HW1 HOH X 753      13.148  10.987  17.949  0.00  0.00            
ATOM   2307  HW2 HOH X 753      12.595   9.583  18.080  0.00  0.00            
ATOM   2308  OW  HOH X 754      10.824   3.743  23.482  0.00  0.00            
ATOM   2309  HW1 HOH X 754      11.183   4.589  23.217  0.00  0.00            
ATOM   2310  HW2 HOH X 754      10.741   3.805  24.434  0.00  0.00            
ATOM   2311  OW  HOH X 755      15.275  20.907  24.117  0.00  0.00            
ATOM   2312  HW1 HOH X 755      16.106  21.057  23.664  0.00  0.00            
ATOM   2313  HW2 HOH X 755      15.229  21.603  24.771  0.00  0.00            
ATOM   2314  OW  HOH X 756      19.431   9.186  15.624  0.00  0.00            
ATOM   2315  HW1 HOH X 756      19.688   9.524  16.482  0.00  0.00            
ATOM   2316  HW2 HOH X 756      19.580   8.243  15.683  0.00  0.00            
ATOM   2317  OW  HOH X 757      21.489  13.982  29.779  0.00  0.00            
ATOM   2318  HW1 HOH X 757      21.910  13.905  30.636  0.00  0.00            
ATOM   2319  HW2 HOH X 757      21.357  14.923  29.660  0.00  0.00            
ATOM   2320  OW  HOH X 758       9.100  11.451  20.236  0.00  0.00            
ATOM   2321  HW1 HOH X 758       8.761  11.517  21.128  0.00  0.00            
ATOM   2322  HW2 HOH X 758      10.042  11.593  20.325  0.00  0.00            
ATOM   2323  OW  HOH X 759       5.685  13.408  13.248  0.00  0.00            
ATOM   2324  HW1 HOH X 759       4.900  13.944  13.358  0.00  0.00            
ATOM   2325  HW2 HOH X 759       5.855  13.422  12.306  0.00  0.00            
ATOM   2326  OW  HOH X 760      24.213   6.244  19.380  0.00  0.00            
ATOM   2327  HW1 HOH X 760      24.790   6.155  18.622  0.00  0.00            
ATOM   2328  HW2 HOH X 760      24.231   7.178  19.587  0.00  0.00            
ATOM   2329  OW  HOH X 761      29.094  21.115  18.621  0.00  0.00            
ATOM   2330  HW1 HOH X 761      28.522  21.826  18.909  0.00  0.00            
ATOM   2331  HW2 HOH X 761      29.966  21.509  18.580  0.00  0.00            
ATOM   2332  OW  HOH X 762      10.342  23.341  26.634  0.00  0.00            
ATOM   2333  HW1 HOH X 762       9.747  23.195  27.370  0.00  0.00            
ATOM   2334  HW2 HOH X 762      11.114  22.814  26.841  0.00  0.00            
ATOM   2335  OW  HOH X 763       9.976  19.956   5.192  0.00  0.00            
ATOM   2336  HW1 HOH X 763      10.525  20.248   5.920  0.00  0.00            
ATOM   2337  HW2 HOH X 763       9.080  20.096   5.496  0.00  0.00            
ATOM   2338  OW  HOH X 764      10.758   1.050  13.338  0.00  0.00            
ATOM   2339  HW1 HOH X 764      10.296   0.289  12.986  0.00  0.00            
ATOM   2340  HW2 HOH X 764      11.300   0.697  14.043  0.00  0.00            
ATOM   2341  OW  HOH X 765      24.584   2.754  21.208  0.00  0.00            
ATOM   2342  HW1 HOH X 765      24.511   1.823  21.415  0.00  0.00            
ATOM   2343  HW2 HOH X 765      23.684   3.078  21.237  0.00  0.00            
ATOM   2344  OW  HOH X 766      13.176  14.082  24.776  0.00  0.00            
ATOM   2345  HW1 HOH X 766      12.978  14.930  25.173  0.00  0.00            
ATOM   2346  HW2 HOH X 766      14.028  14.207  24.357  0.00  0.00            
ATOM   2347  OW  HOH X 767       3.290   6.941  11.594  0.00  0.00            
ATOM   2348  HW1 HOH X 767       2.789   7.636  11.168  0.00  0.00            
ATOM   2349  HW2 HOH X 767       2.629   6.312  11.884  0.00  0.00            
ATOM   2350  OW  HOH X 768      15.997  23.118  25.616  0.00  0.00            
ATOM   2351  HW1 HOH X 768      15.472  23.466  26.336  0.00  0.00            
ATOM   2352  HW2 HOH X 768      16.901  23.311  25.862  0.00  0.00            
ATOM   2353  OW  HOH X 769      10.239  23.095  29.470  0.00  0.00            
ATOM   2354  HW1 HOH X 769       9.734  22.518  30.042  0.00  0.00            
ATOM   2355  HW2 HOH X 769      11.153  22.909  29.687  0.00  0.00            
ATOM   2356  OW  HOH X 770      26.621   1.982   4.725  0.00  0.00            
ATOM   2357  HW1 HOH X 770      26.509   1.114   4.339  0.00  0.00            
ATOM   2358  HW2 HOH X 770      25.980   2.531   4.272  0.00  0.00            
ATOM   2359  OW  HOH X 771      10.844   0.911   2.927  0.00  0.00            
ATOM   2360  HW1 HOH X 771      11.035   1.520   3.640  0.00  0.00            
ATOM   2361  HW2 HOH X 771      10.082   0.418   3.230  0.00  0.00            
ATOM   2362  OW  HOH X 772      14.894  20.957   6.223  0.00  0.00            
ATOM   2363  HW1 HOH X 772      15.174  21.743   6.693  0.00  0.00            
ATOM   2364  HW2 HOH X 772      15.676  20.406   6.190  0.00  0.00            
ATOM   2365  OW  HOH X 773       4.612  13.332  31.841  0.00  0.00            
ATOM   2366  HW1 HOH X 773       5.192  14.093  31.833  0.00  0.00            
ATOM   2367  HW2 HOH X 773       3.729  13.702  31.839  0.00  0.00            
ATOM   2368  OW  HOH X 774      24.139  15.903  28.405  0.00  0.00            
ATOM   2369  HW1 HOH X 774      23.462  15.789  27.738  0.00  0.00            
ATOM   2370  HW2 HOH X 774      23.685  16.312  29.142  0.00  0.00            
ATOM   2371  OW  HOH X 775      25.629  23.137   4.048  0.00  0.00            
ATOM   2372  HW1 HOH X 775      25.224  23.897   4.466  0.00  0.00            
ATOM   2373  HW2 HOH X 775      26.197  22.766   4.723  0.00  0.00            
ATOM   2374  OW  HOH X 776       0.371  29.640  23.171  0.00  0.00            
ATOM   2375  HW1 HOH X 776       1.214  30.046  23.369  0.00  0.00            
ATOM   2376  HW2 HOH X 776      -0.248  30.074  23.759  0.00  0.00            
ATOM   2377  OW  HOH X 777       9.296  12.471  15.512  0.00  0.00            
ATOM   2378  HW1 HOH X 777      10.162  12.845  15.354  0.00  0.00            
ATOM   2379  HW2 HOH X 777       9.141  12.611  16.446  0.00  0.00            
ATOM   2380  OW  HOH X 778       1.165   7.189   3.330  0.00  0.00            
ATOM   2381  HW1 HOH X 778       1.940   7.439   3.834  0.00  0.00            
ATOM   2382  HW2 HOH X 778       1.476   7.127   2.427  0.00  0.00            
ATOM   2383  OW  HOH X 779      28.826   4.780   5.068  0.00  0.00            
ATOM   2384  HW1 HOH X 779      28.850   4.047   5.683  0.00  0.00            
ATOM   2385  HW2 HOH X 779      27.906   5.043   5.044  0.00  0.00            
ATOM   2386  OW  HOH X 780       1.548  18.267  26.654  0.00  0.00            
ATOM   2387  HW1 HOH X 780       2.399  18.356  27.083  0.00  0.00            
ATOM   2388  HW2 HOH X 780       1.213  17.423  26.957  0.00  0.00            
ATOM   2389  OW  HOH X 781      26.218  27.702  37.661  0.00  0.00            
ATOM   2390  HW1 HOH X 781      25.352  28.110  37.637  0.00  0.00            
ATOM   2391  HW2 HOH X 781      26.411  27.498  36.746  0.00  0.00            
ATOM   2392  OW  HOH X 782      18.477   2.884  33.920  0.00  0.00            
ATOM   2393  HW1 HOH X 782      18.635   3.086  32.998  0.00  0.00            
ATOM   2394  HW2 HOH X 782      19.223   3.268  34.381  0.00  0.00            
ATOM   2395  OW  HOH X 783      11.860  17.599   5.799  0.00  0.00            
ATOM   2396  HW1 HOH X 783      11.158  17.334   6.394  0.00  0.00            
ATOM   2397  HW2 HOH X 783      11.702  17.093   5.002  0.00  0.00            
ATOM   2398  OW  HOH X 784      27.568   6.735  14.149  0.00  0.00            
ATOM   2399  HW1 HOH X 784      26.699   6.488  14.465  0.00  0.00            
ATOM   2400  HW2 HOH X 784      28.172   6.204  14.669  0.00  0.00            
ATOM   2401  OW  HOH X 785      24.090  20.023   7.553  0.00  0.00            
ATOM   2402  HW1 HOH X 785      24.186  20.024   6.600  0.00  0.00            
ATOM   2403  HW2 HOH X 785      23.144  20.000   7.698  0.00  0.00            
ATOM   2404  OW  HOH X 786      14.186  23.845   1.489  0.00  0.00            
ATOM   2405  HW1 HOH X 786      13.924  23.696   2.397  0.00  0.00            
ATOM   2406  HW2 HOH X 786      14.662  23.052   1.243  0.00  0.00            
ATOM   2407  OW  HOH X 787       7.048  20.193  29.121  0.00  0.00            
ATOM   2408  HW1 HOH X 787       7.597  19.409  29.162  0.00  0.00            
ATOM   2409  HW2 HOH X 787       7.263  20.592  28.278  0.00  0.00            
ATOM   2410  OW  HOH X 788      17.059  10.709  27.449  0.00  0.00            
ATOM   2411  HW1 HOH X 788      16.754  10.776  26.545  0.00  0.00            
ATOM   2412  HW2 HOH X 788      17.602  11.487  27.577  0.00  0.00            
ATOM   2413  OW  HOH X 789      29.121  20.020  32.562  0.00  0.00            
ATOM   2414  HW1 HOH X 789      28.831  19.991  31.650  0.00  0.00            
ATOM   2415  HW2 HOH X 789      28.335  20.247  33.057  0.00  0.00            
ATOM   2416  OW  HOH X 790      28.159   0.147  14.134  0.00  0.00            
ATOM   2417  HW1 HOH X 790      27.872   0.532  14.962  0.00  0.00            
ATOM   2418  HW2 HOH X 790      27.624   0.581  13.469  0.00  0.00            
ATOM   2419  OW  HOH X 791      22.517  25.668  27.791  0.00  0.00            
ATOM   2420  HW1 HOH X 791      22.000  25.385  28.546  0.00  0.00            
ATOM   2421  HW2 HOH X 791      23.117  26.325  28.145  0.00  0.00            
ATOM   2422  OW  HOH X 792      14.595  12.712  36.129  0.00  0.00            
ATOM   2423  HW1 HOH X 792      15.512  12.974  36.044  0.00  0.00            
ATOM   2424  HW2 HOH X 792      14.629  11.769  36.289  0.00  0.00            
ATOM   2425  OW  HOH X 793       5.263  28.240  36.597  0.00  0.00            
ATOM   2426  HW1 HOH X 793       6.189  28.010  36.525  0.00  0.00            
ATOM   2427  HW2 HOH X 793       4.872  27.514  37.083  0.00  0.00            
ATOM   2428  OW  HOH X 794      15.154  21.354  13.615  0.00  0.00            
ATOM   2429  HW1 HOH X 794      15.507  22.039  13.047  0.00  0.00            
ATOM   2430  HW2 HOH X 794      15.927  20.942  14.002  0.00  0.00            
ATOM   2431  OW  HOH X 795       6.827   9.136  20.461  0.00  0.00            
ATOM   2432  HW1 HOH X 795       7.047   9.484  21.325  0.00  0.00            
ATOM   2433  HW2 HOH X 795       6.055   9.634  20.192  0.00  0.00            
ATOM   2434  OW  HOH X 796      11.856   7.839  31.313  0.00  0.00            
ATOM   2435  HW1 HOH X 796      11.256   7.096  31.365  0.00  0.00            
ATOM   2436  HW2 HOH X 796      12.693   7.455  31.052  0.00  0.00            
ATOM   2437  OW  HOH X 797      20.249  28.413  12.517  0.00  0.00            
ATOM   2438  HW1 HOH X 797      20.249  27.536  12.900  0.00  0.00            
ATOM   2439  HW2 HOH X 797      19.471  28.835  12.882  0.00  0.00            
ATOM   2440  OW  HOH X 798      12.327   8.402  34.076  0.00  0.00            
ATOM   2441  HW1 HOH X 798      12.325   8.301  33.124  0.00  0.00            
ATOM   2442  HW2 HOH X 798      11.566   7.902  34.372  0.00  0.00            
ATOM   2443  OW  HOH X 799      15.119  25.014  37.509  0.00  0.00            
ATOM   2444  HW1 HOH X 799      14.993  24.841  36.576  0.00  0.00            
ATOM   2445  HW2 HOH X 799      14.307  24.717  37.920  0.00  0.00            
ATOM   2446  OW  HOH X 800      20.528  13.943   6.673  0.00  0.00            
ATOM   2447  HW1 HOH X 800      19.977  14.716   6.550  0.00  0.00            
ATOM   2448  HW2 HOH X 800      20.179  13.299   6.057  0.00  0.00            
ATOM   2449  OW  HOH X 801      11.095  19.247  20.804  0.00  0.00            
ATOM   2450  HW1 HOH X 801      11.959  19.461  20.451  0.00  0.00            
ATOM   2451  HW2 HOH X 801      10.976  19.857  21.532  0.00  0.00            
ATOM   2452  OW  HOH X 802      23.344  22.010  19.663  0.00  0.00            
ATOM   2453  HW1 HOH X 802      23.572  22.398  18.818  0.00  0.00            
ATOM   2454  HW2 HOH X 802      22.720  21.317  19.448  0.00  0.00            
ATOM   2455  OW  HOH X 803      15.727  22.026  40.043  0.00  0.00            
ATOM   2456  HW1 HOH X 803      15.337  21.987  39.170  0.00  0.00            
ATOM   2457  HW2 HOH X 803      15.886  21.112  40.276  0.00  0.00            
ATOM   2458  OW  HOH X 804      28.932   3.323  11.441  0.00  0.00            
ATOM   2459  HW1 HOH X 804      29.823   3.238  11.778  0.00  0.00            
ATOM   2460  HW2 HOH X 804      28.878   2.675  10.738  0.00  0.00            
ATOM   2461  OW  HOH X 805      23.336  28.569  37.968  0.00  0.00            
ATOM   2462  HW1 HOH X 805      22.796  28.534  37.179  0.00  0.00            
ATOM   2463  HW2 HOH X 805      23.365  29.498  38.198  0.00  0.00            
ATOM   2464  OW  HOH X 806      15.331  29.476  32.852  0.00  0.00            
ATOM   2465  HW1 HOH X 806      15.757  28.919  33.503  0.00  0.00            
ATOM   2466  HW2 HOH X 806      15.201  30.312  33.300  0.00  0.00            
ATOM   2467  OW  HOH X 807      25.090  22.272  31.821  0.00  0.00            
ATOM   2468  HW1 HOH X 807      26.040  22.176  31.892  0.00  0.00            
ATOM   2469  HW2 HOH X 807      24.836  21.648  31.141  0.00  0.00            
ATOM   2470  OW  HOH X 808      13.809  10.165  23.685  0.00  0.00            
ATOM   2471  HW1 HOH X 808      13.383   9.329  23.873  0.00  0.00            
ATOM   2472  HW2 HOH X 808      13.386  10.476  22.884  0.00  0.00            
ATOM   2473  OW  HOH X 809      16.901  15.217  27.133  0.00  0.00            
ATOM   2474  HW1 HOH X 809      17.014  15.623  26.273  0.00  0.00            
ATOM   2475  HW2 HOH X 809      15.963  15.285  27.309  0.00  0.00            
ATOM   2476  OW  HOH X 810       3.918  12.058   4.565  0.00  0.00            
ATOM   2477  HW1 HOH X 810       4.838  11.951   4.807  0.00  0.00            
ATOM   2478  HW2 HOH X 810       3.441  11.970   5.390  0.00  0.00            
ATOM   2479  OW  HOH X 811       1.771  28.661  27.603  0.00  0.00            
ATOM   2480  HW1 HOH X 811       2.584  29.166  27.630  0.00  0.00            
ATOM   2481  HW2 HOH X 811       1.686  28.392  26.688  0.00  0.00            
ATOM   2482  OW  HOH X 812      20.377  27.807   0.442  0.00  0.00            
ATOM   2483  HW1 HOH X 812      19.624  27.283   0.167  0.00  0.00            
ATOM   2484  HW2 HOH X 812      20.306  28.614  -0.067  0.00  0.00            
ATOM   2485  OW  HOH X 813      20.931  24.268  30.174  0.00  0.00            
ATOM   2486  HW1 HOH X 813      21.827  24.281  30.510  0.00  0.00            
ATOM   2487  HW2 HOH X 813      20.556  25.103  30.456  0.00  0.00            
ATOM   2488  OW  HOH X 814       4.454  12.969  20.553  0.00  0.00            
ATOM   2489  HW1 HOH X 814       4.637  13.774  21.038  0.00  0.00            
ATOM   2490  HW2 HOH X 814       4.228  13.265  19.672  0.00  0.00            
ATOM   2491  OW  HOH X 815      26.138   4.368  11.351  0.00  0.00            
ATOM   2492  HW1 HOH X 815      27.038   4.085  11.516  0.00  0.00            
ATOM   2493  HW2 HOH X 815      25.639   4.025  12.092  0.00  0.00            
ATOM   2494  OW  HOH X 816       5.260   1.125   4.521  0.00  0.00            
ATOM   2495  HW1 HOH X 816       5.279   1.320   5.458  0.00  0.00            
ATOM   2496  HW2 HOH X 816       5.958   1.665   4.150  0.00  0.00            
ATOM   2497  OW  HOH X 817      10.484  18.679   9.825  0.00  0.00            
ATOM   2498  HW1 HOH X 817      10.446  17.955  10.450  0.00  0.00            
ATOM   2499  HW2 HOH X 817      11.286  18.523   9.327  0.00  0.00            
ATOM   2500  OW  HOH X 818      25.704  22.428  10.462  0.00  0.00            
ATOM   2501  HW1 HOH X 818      25.552  22.352   9.520  0.00  0.00            
ATOM   2502  HW2 HOH X 818      26.533  21.974  10.608  0.00  0.00            
ATOM   2503  OW  HOH X 819      11.380   8.454  17.289  0.00  0.00            
ATOM   2504  HW1 HOH X 819      11.704   7.649  17.692  0.00  0.00            
ATOM   2505  HW2 HOH X 819      10.436   8.439  17.449  0.00  0.00            
ATOM   2506  OW  HOH X 820      18.319  11.059  34.131  0.00  0.00            
ATOM   2507  HW1 HOH X 820      18.229  11.892  33.669  0.00  0.00            
ATOM   2508  HW2 HOH X 820      17.427  10.714  34.178  0.00  0.00            
ATOM   2509  OW  HOH X 821       7.745  21.867  23.114  0.00  0.00            
ATOM   2510  HW1 HOH X 821       8.447  21.246  22.921  0.00  0.00            
ATOM   2511  HW2 HOH X 821       8.168  22.554  23.631  0.00  0.00            
ATOM   2512  OW  HOH X 822       8.297   9.310   5.248  0.00  0.00            
ATOM   2513  HW1 HOH X 822       9.220   9.065   5.184  0.00  0.00            
ATOM   2514  HW2 HOH X 822       7.822   8.546   4.922  0.00  0.00            
ATOM   2515  OW  HOH X 823       9.844  27.066  17.369  0.00  0.00            
ATOM   2516  HW1 HOH X 823      10.750  27.019  17.066  0.00  0.00            
ATOM   2517  HW2 HOH X 823       9.594  27.981  17.237  0.00  0.00            
ATOM   2518  OW  HOH X 824      17.926  29.112  13.969  0.00  0.00            
ATOM   2519  HW1 HOH X 824      17.490  28.277  14.137  0.00  0.00            
ATOM   2520  HW2 HOH X 824      18.110  29.466  14.838  0.00  0.00            
ATOM   2521  OW  HOH X 825      16.302   2.114   0.751  0.00  0.00            
ATOM   2522  HW1 HOH X 825      16.094   2.881   1.284  0.00  0.00            
ATOM   2523  HW2 HOH X 825      16.401   2.458  -0.137  0.00  0.00            
ATOM   2524  OW  HOH X 826      23.682   7.091  30.978  0.00  0.00            
ATOM   2525  HW1 HOH X 826      23.903   7.178  31.905  0.00  0.00            
ATOM   2526  HW2 HOH X 826      24.225   7.746  30.539  0.00  0.00            
ATOM   2527  OW  HOH X 827      11.636   7.621  26.691  0.00  0.00            
ATOM   2528  HW1 HOH X 827      11.555   6.680  26.851  0.00  0.00            
ATOM   2529  HW2 HOH X 827      11.155   7.768  25.877  0.00  0.00            
ATOM   2530  OW  HOH X 828       0.034  12.057  19.394  0.00  0.00            
ATOM   2531  HW1 HOH X 828       0.667  11.791  18.727  0.00  0.00            
ATOM   2532  HW2 HOH X 828       0.569  12.393  20.112  0.00  0.00            
ATOM   2533  OW  HOH X 829       2.140  19.173   8.133  0.00  0.00            
ATOM   2534  HW1 HOH X 829       1.386  19.628   8.509  0.00  0.00            
ATOM   2535  HW2 HOH X 829       2.547  18.729   8.877  0.00  0.00            
ATOM   2536  OW  HOH X 830       1.683  23.888  33.304  0.00  0.00            
ATOM   2537  HW1 HOH X 830       1.674  24.789  33.626  0.00  0.00            
ATOM   2538  HW2 HOH X 830       1.016  23.871  32.618  0.00  0.00            
ATOM   2539  OW  HOH X 831      23.411  27.352  30.241  0.00  0.00            
ATOM   2540  HW1 HOH X 831      23.547  27.252  31.184  0.00  0.00            
ATOM   2541  HW2 HOH X 831      22.743  28.033  30.166  0.00  0.00            
ATOM   2542  OW  HOH X 832      18.177  29.026  16.875  0.00  0.00            
ATOM   2543  HW1 HOH X 832      19.050  29.280  17.173  0.00  0.00            
ATOM   2544  HW2 HOH X 832      18.012  28.185  17.300  0.00  0.00            
ATOM   2545  OW  HOH X 833       2.402  20.882  -0.140  0.00  0.00            
ATOM   2546  HW1 HOH X 833       3.210  20.843   0.371  0.00  0.00            
ATOM   2547  HW2 HOH X 833       1.710  20.680   0.489  0.00  0.00            
ATOM   2548  OW  HOH X 834      26.616   9.314  37.772  0.00  0.00            
ATOM   2549  HW1 HOH X 834      26.845   9.825  36.996  0.00  0.00            
ATOM   2550  HW2 HOH X 834      25.761   9.653  38.039  0.00  0.00            
ATOM   2551  OW  HOH X 835       9.254  11.704   4.126  0.00  0.00            
ATOM   2552  HW1 HOH X 835       8.724  11.015   4.527  0.00  0.00            
ATOM   2553  HW2 HOH X 835       9.704  11.269   3.401  0.00  0.00            
ATOM   2554  OW  HOH X 836      27.159  24.417  16.439  0.00  0.00            
ATOM   2555  HW1 HOH X 836      27.004  24.308  17.377  0.00  0.00            
ATOM   2556  HW2 HOH X 836      27.914  23.858  16.254  0.00  0.00            
ATOM   2557  OW  HOH X 837      20.208   6.744  16.357  0.00  0.00            
ATOM   2558  HW1 HOH X 837      19.743   5.940  16.588  0.00  0.00            
ATOM   2559  HW2 HOH X 837      20.872   6.465  15.727  0.00  0.00            
ATOM   2560  OW  HOH X 838      19.783  26.263  19.923  0.00  0.00            
ATOM   2561  HW1 HOH X 838      20.365  25.558  20.207  0.00  0.00            
ATOM   2562  HW2 HOH X 838      19.100  26.294  20.593  0.00  0.00            
ATOM   2563  OW  HOH X 839       6.902   7.872  28.165  0.00  0.00            
ATOM   2564  HW1 HOH X 839       6.503   8.714  27.946  0.00  0.00            
ATOM   2565  HW2 HOH X 839       7.802   8.089  28.408  0.00  0.00            
ATOM   2566  OW  HOH X 840      27.581   7.048   0.353  0.00  0.00            
ATOM   2567  HW1 HOH X 840      28.099   6.537   0.975  0.00  0.00            
ATOM   2568  HW2 HOH X 840      26.798   7.300   0.842  0.00  0.00            
ATOM   2569  OW  HOH X 841      12.111  13.455  37.406  0.00  0.00            
ATOM   2570  HW1 HOH X 841      11.896  14.048  36.686  0.00  0.00            
ATOM   2571  HW2 HOH X 841      12.808  12.898  37.059  0.00  0.00            
ATOM   2572  OW  HOH X 842      26.178  14.541  38.923  0.00  0.00            
ATOM   2573  HW1 HOH X 842      25.642  13.998  38.345  0.00  0.00            
ATOM   2574  HW2 HOH X 842      26.004  14.201  39.801  0.00  0.00            
ATOM   2575  OW  HOH X 843      20.251  16.267  29.807  0.00  0.00            
ATOM   2576  HW1 HOH X 843      19.650  15.630  30.192  0.00  0.00            
ATOM   2577  HW2 HOH X 843      19.793  16.591  29.031  0.00  0.00            
ATOM   2578  OW  HOH X 844      23.551  10.842  35.859  0.00  0.00            
ATOM   2579  HW1 HOH X 844      23.753  10.277  35.113  0.00  0.00            
ATOM   2580  HW2 HOH X 844      23.663  10.277  36.624  0.00  0.00            
ATOM   2581  OW  HOH X 845       8.408  15.878  23.255  0.00  0.00            
ATOM   2582  HW1 HOH X 845       8.851  15.031  23.307  0.00  0.00            
ATOM   2583  HW2 HOH X 845       8.981  16.415  22.708  0.00  0.00            
ATOM   2584  OW  HOH X 846      19.466   6.239  24.907  0.00  0.00            
ATOM   2585  HW1 HOH X 846      19.089   5.803  25.671  0.00  0.00            
ATOM   2586  HW2 HOH X 846      19.132   5.743  24.159  0.00  0.00            
ATOM   2587  OW  HOH X 847      15.439  28.974  28.340  0.00  0.00            
ATOM   2588  HW1 HOH X 847      14.959  28.197  28.056  0.00  0.00            
ATOM   2589  HW2 HOH X 847      16.129  29.083  27.686  0.00  0.00            
ATOM   2590  OW  HOH X 848      18.617   4.499  26.887  0.00  0.00            
ATOM   2591  HW1 HOH X 848      17.712   4.638  27.169  0.00  0.00            
ATOM   2592  HW2 HOH X 848      18.968   3.865  27.513  0.00  0.00            
ATOM   2593  OW  HOH X 849       5.733  10.474  13.185  0.00  0.00            
ATOM   2594  HW1 HOH X 849       5.686  11.381  13.487  0.00  0.00            
ATOM   2595  HW2 HOH X 849       6.670  10.285  13.137  0.00  0.00            
ATOM   2596  OW  HOH X 850       9.292  22.506  18.145  0.00  0.00            
ATOM   2597  HW1 HOH X 850       8.757  23.293  18.249  0.00  0.00            
ATOM   2598  HW2 HOH X 850       8.779  21.811  18.556  0.00  0.00            
ATOM   2599  OW  HOH X 851      25.606  12.834  22.064  0.00  0.00            
ATOM   2600  HW1 HOH X 851      25.464  13.245  21.211  0.00  0.00            
ATOM   2601  HW2 HOH X 851      26.555  12.863  22.190  0.00  0.00            
ATOM   2602  OW  HOH X 852      11.339  17.834  31.275  0.00  0.00            
ATOM   2603  HW1 HOH X 852      11.435  17.001  30.813  0.00  0.00            
ATOM   2604  HW2 HOH X 852      10.505  17.756  31.738  0.00  0.00            
ATOM   2605  OW  HOH X 853      27.381   3.462  23.468  0.00  0.00            
ATOM   2606  HW1 HOH X 853      27.343   3.610  22.523  0.00  0.00            
ATOM   2607  HW2 HOH X 853      27.648   2.547  23.558  0.00  0.00            
ATOM   2608  OW  HOH X 854       2.015   7.661  16.817  0.00  0.00            
ATOM   2609  HW1 HOH X 854       2.061   7.947  17.730  0.00  0.00            
ATOM   2610  HW2 HOH X 854       1.215   7.138  16.770  0.00  0.00            
ATOM   2611  OW  HOH X 855       5.892  28.016  11.531  0.00  0.00            
ATOM   2612  HW1 HOH X 855       5.564  28.910  11.433  0.00  0.00            
ATOM   2613  HW2 HOH X 855       6.647  27.972  10.944  0.00  0.00            
ATOM   2614  OW  HOH X 856      27.120   3.992   8.687  0.00  0.00            
ATOM   2615  HW1 HOH X 856      26.818   3.913   9.592  0.00  0.00            
ATOM   2616  HW2 HOH X 856      26.536   3.420   8.189  0.00  0.00            
ATOM   2617  OW  HOH X 857      19.523   7.234  34.888  0.00  0.00            
ATOM   2618  HW1 HOH X 857      18.953   7.161  34.123  0.00  0.00            
ATOM   2619  HW2 HOH X 857      20.239   6.623  34.714  0.00  0.00            
ATOM   2620  OW  HOH X 858      10.730  15.421  -0.175  0.00  0.00            
ATOM   2621  HW1 HOH X 858      11.517  14.916   0.029  0.00  0.00            
ATOM   2622  HW2 HOH X 858      10.195  15.362   0.616  0.00  0.00            
ATOM   2623  OW  HOH X 859       6.982  27.639  39.869  0.00  0.00            
ATOM   2624  HW1 HOH X 859       6.659  26.756  40.051  0.00  0.00            
ATOM   2625  HW2 HOH X 859       6.198  28.139  39.644  0.00  0.00            
ATOM   2626  OW  HOH X 860      13.769   9.702  10.802  0.00  0.00            
ATOM   2627  HW1 HOH X 860      13.966   9.132  11.545  0.00  0.00            
ATOM   2628  HW2 HOH X 860      13.599  10.558  11.194  0.00  0.00            
ATOM   2629  OW  HOH X 861      14.038   3.485  18.093  0.00  0.00            
ATOM   2630  HW1 HOH X 861      14.659   2.893  18.517  0.00  0.00            
ATOM   2631  HW2 HOH X 861      13.810   4.120  18.772  0.00  0.00            
ATOM   2632  OW  HOH X 862      28.096   8.825  24.955  0.00  0.00            
ATOM   2633  HW1 HOH X 862      27.691   7.961  24.876  0.00  0.00            
ATOM   2634  HW2 HOH X 862      27.410   9.437  24.690  0.00  0.00            
ATOM   2635  OW  HOH X 863       4.171   0.480  34.228  0.00  0.00            
ATOM   2636  HW1 HOH X 863       5.032   0.755  33.912  0.00  0.00            
ATOM   2637  HW2 HOH X 863       4.198   0.644  35.171  0.00  0.00            
ATOM   2638  OW  HOH X 864      11.181  15.506  29.687  0.00  0.00            
ATOM   2639  HW1 HOH X 864      10.523  15.226  30.322  0.00  0.00            
ATOM   2640  HW2 HOH X 864      11.744  14.740  29.570  0.00  0.00            
ATOM   2641  OW  HOH X 865      14.341  16.525  22.325  0.00  0.00            
ATOM   2642  HW1 HOH X 865      14.223  17.067  23.104  0.00  0.00            
ATOM   2643  HW2 HOH X 865      15.058  16.944  21.848  0.00  0.00            
ATOM   2644  OW  HOH X 866       8.128  15.702  13.825  0.00  0.00            
ATOM   2645  HW1 HOH X 866       7.612  15.088  14.348  0.00  0.00            
ATOM   2646  HW2 HOH X 866       7.576  16.482  13.758  0.00  0.00            
ATOM   2647  OW  HOH X 867       7.279  20.147   2.731  0.00  0.00            
ATOM   2648  HW1 HOH X 867       7.091  19.967   3.652  0.00  0.00            
ATOM   2649  HW2 HOH X 867       7.746  19.369   2.425  0.00  0.00            
ATOM   2650  OW  HOH X 868      10.582  26.902  28.779  0.00  0.00            
ATOM   2651  HW1 HOH X 868      10.061  26.108  28.904  0.00  0.00            
ATOM   2652  HW2 HOH X 868      10.496  27.101  27.847  0.00  0.00            
ATOM   2653  OW  HOH X 869      29.185  13.568  25.293  0.00  0.00            
ATOM   2654  HW1 HOH X 869      29.027  12.807  25.850  0.00  0.00            
ATOM   2655  HW2 HOH X 869      30.138  13.658  25.274  0.00  0.00            
ATOM   2656  OW  HOH X 870      11.790  12.945   4.188  0.00  0.00            
ATOM   2657  HW1 HOH X 870      12.337  12.272   3.783  0.00  0.00            
ATOM   2658  HW2 HOH X 870      10.908  12.574   4.181  0.00  0.00            
ATOM   2659  OW  HOH X 871       5.582  19.340  22.360  0.00  0.00            
ATOM   2660  HW1 HOH X 871       5.846  18.469  22.063  0.00  0.00            
ATOM   2661  HW2 HOH X 871       4.952  19.637  21.704  0.00  0.00            
ATOM   2662  OW  HOH X 872       2.116  11.788   6.915  0.00  0.00            
ATOM   2663  HW1 HOH X 872       1.823  12.085   7.777  0.00  0.00            
ATOM   2664  HW2 HOH X 872       2.107  10.833   6.975  0.00  0.00            
ATOM   2665  OW  HOH X 873      15.574  12.244   3.518  0.00  0.00            
ATOM   2666  HW1 HOH X 873      15.664  13.086   3.071  0.00  0.00            
ATOM   2667  HW2 HOH X 873      14.668  11.982   3.357  0.00  0.00            
ATOM   2668  OW  HOH X 874       7.186  28.819  16.036  0.00  0.00            
ATOM   2669  HW1 HOH X 874       8.104  29.029  16.210  0.00  0.00            
ATOM   2670  HW2 HOH X 874       6.830  29.613  15.637  0.00  0.00            
ATOM   2671  OW  HOH X 875       3.998  27.193  29.263  0.00  0.00            
ATOM   2672  HW1 HOH X 875       4.242  26.832  28.411  0.00  0.00            
ATOM   2673  HW2 HOH X 875       4.226  28.121  29.205  0.00  0.00            
ATOM   2674  OW  HOH X 876      28.866  24.467   7.000  0.00  0.00            
ATOM   2675  HW1 HOH X 876      29.491  25.192   7.017  0.00  0.00            
ATOM   2676  HW2 HOH X 876      28.068  24.830   7.384  0.00  0.00            
ATOM   2677  OW  HOH X 877       2.594   5.785  32.048  0.00  0.00            
ATOM   2678  HW1 HOH X 877       2.066   6.340  32.621  0.00  0.00            
ATOM   2679  HW2 HOH X 877       1.956   5.327  31.502  0.00  0.00            
ATOM   2680  OW  HOH X 878      21.255  18.155  38.661  0.00  0.00            
ATOM   2681  HW1 HOH X 878      21.250  17.692  39.499  0.00  0.00            
ATOM   2682  HW2 HOH X 878      21.319  19.080  38.899  0.00  0.00            
ATOM   2683  OW  HOH X 879      27.638  22.294  13.852  0.00  0.00            
ATOM   2684  HW1 HOH X 879      27.886  23.210  13.979  0.00  0.00            
ATOM   2685  HW2 HOH X 879      27.443  21.974  14.733  0.00  0.00            
ATOM   2686  OW  HOH X 880       3.525   2.295  25.705  0.00  0.00            
ATOM   2687  HW1 HOH X 880       2.872   2.995  25.716  0.00  0.00            
ATOM   2688  HW2 HOH X 880       4.349   2.733  25.916  0.00  0.00            
ATOM   2689  OW  HOH X 881       3.668  17.534   0.234  0.00  0.00            
ATOM   2690  HW1 HOH X 881       3.734  18.081   1.017  0.00  0.00            
ATOM   2691  HW2 HOH X 881       4.234  16.784   0.417  0.00  0.00            
ATOM   2692  OW  HOH X 882      17.041  28.889  35.402  0.00  0.00            
ATOM   2693  HW1 HOH X 882      16.245  28.895  35.932  0.00  0.00            
ATOM   2694  HW2 HOH X 882      17.727  29.193  35.995  0.00  0.00            
ATOM   2695  OW  HOH X 883       3.794   6.049  36.271  0.00  0.00            
ATOM   2696  HW1 HOH X 883       4.368   5.854  35.530  0.00  0.00            
ATOM   2697  HW2 HOH X 883       2.975   5.600  36.064  0.00  0.00            
ATOM   2698  OW  HOH X 884      25.777   4.293  17.166  0.00  0.00            
ATOM   2699  HW1 HOH X 884      26.252   4.116  16.354  0.00  0.00            
ATOM   2700  HW2 HOH X 884      26.457   4.339  17.838  0.00  0.00            
ATOM   2701  OW  HOH X 885      26.745   7.639   3.623  0.00  0.00            
ATOM   2702  HW1 HOH X 885      26.070   8.289   3.427  0.00  0.00            
ATOM   2703  HW2 HOH X 885      26.308   7.001   4.186  0.00  0.00            
ATOM   2704  OW  HOH X 886      21.399  19.659   8.063  0.00  0.00            
ATOM   2705  HW1 HOH X 886      21.229  20.563   8.331  0.00  0.00            
ATOM   2706  HW2 HOH X 886      21.336  19.153   8.873  0.00  0.00            
ATOM   2707  OW  HOH X 887      12.766  14.042  18.674  0.00  0.00            
ATOM   2708  HW1 HOH X 887      13.189  14.271  17.846  0.00  0.00            
ATOM   2709  HW2 HOH X 887      13.082  14.699  19.294  0.00  0.00            
ATOM   2710  OW  HOH X 888      27.843   1.220  16.784  0.00  0.00            
ATOM   2711  HW1 HOH X 888      27.031   1.088  17.273  0.00  0.00            
ATOM   2712  HW2 HOH X 888      28.491   0.687  17.246  0.00  0.00            
ATOM   2713  OW  HOH X 889      27.872  16.711  34.179  0.00  0.00            
ATOM   2714  HW1 HOH X 889      27.065  16.640  33.669  0.00  0.00            
ATOM   2715  HW2 HOH X 889      27.575  16.851  35.079  0.00  0.00            
ATOM   2716  OW  HOH X 890       6.174  16.595  20.578  0.00  0.00            
ATOM   2717  HW1 HOH X 890       6.967  16.992  20.940  0.00  0.00            
ATOM   2718  HW2 HOH X 890       5.831  16.055  21.289  0.00  0.00            
ATOM   2719  OW  HOH X 891      16.467   8.180  31.246  0.00  0.00            
ATOM   2720  HW1 HOH X 891      16.424   7.716  32.082  0.00  0.00            
ATOM   2721  HW2 HOH X 891      16.350   9.101  31.476  0.00  0.00            
ATOM   2722  OW  HOH X 892       6.437  21.594   8.599  0.00  0.00            
ATOM   2723  HW1 HOH X 892       5.761  22.149   8.989  0.00  0.00            
ATOM   2724  HW2 HOH X 892       6.650  20.959   9.283  0.00  0.00            
ATOM   2725  OW  HOH X 893      21.780  17.395  23.220  0.00  0.00            
ATOM   2726  HW1 HOH X 893      22.712  17.321  23.426  0.00  0.00            
ATOM   2727  HW2 HOH X 893      21.575  16.594  22.738  0.00  0.00            
ATOM   2728  OW  HOH X 894      21.353  15.679  18.898  0.00  0.00            
ATOM   2729  HW1 HOH X 894      21.098  14.825  18.548  0.00  0.00            
ATOM   2730  HW2 HOH X 894      21.878  16.076  18.202  0.00  0.00            
ATOM   2731  OW  HOH X 895      26.803  28.755   3.295  0.00  0.00            
ATOM   2732  HW1 HOH X 895      25.935  28.371   3.169  0.00  0.00            
ATOM   2733  HW2 HOH X 895      27.048  28.504   4.186  0.00  0.00            
ATOM   2734  OW  HOH X 896      26.162  17.045  36.403  0.00  0.00            
ATOM   2735  HW1 HOH X 896      26.886  17.437  36.891  0.00  0.00            
ATOM   2736  HW2 HOH X 896      25.412  17.610  36.591  0.00  0.00            
ATOM   2737  OW  HOH X 897       4.659  23.634   9.043  0.00  0.00            
ATOM   2738  HW1 HOH X 897       4.987  24.446   8.657  0.00  0.00            
ATOM   2739  HW2 HOH X 897       3.774  23.542   8.691  0.00  0.00            
ATOM   2740  OW  HOH X 898       3.843   9.913  32.230  0.00  0.00            
ATOM   2741  HW1 HOH X 898       4.713  10.094  32.585  0.00  0.00            
ATOM   2742  HW2 HOH X 898       3.290   9.787  33.001  0.00  0.00            
ATOM   2743  OW  HOH X 899       3.946   5.966  24.825  0.00  0.00            
ATOM   2744  HW1 HOH X 899       4.893   5.836  24.779  0.00  0.00            
ATOM   2745  HW2 HOH X 899       3.763   6.070  25.759  0.00  0.00            
ATOM   2746  OW  HOH X 900      20.761  16.489  33.004  0.00  0.00            
ATOM   2747  HW1 HOH X 900      20.638  17.288  32.491  0.00  0.00            
ATOM   2748  HW2 HOH X 900      20.770  16.786  33.914  0.00  0.00            
ATOM   2749  OW  HOH X 901       7.798  27.369   5.629  0.00  0.00            
ATOM   2750  HW1 HOH X 901       6.862  27.190   5.537  0.00  0.00            
ATOM   2751  HW2 HOH X 901       8.193  26.510   5.778  0.00  0.00            
ATOM   2752  OW  HOH X 902      25.326   7.681  33.328  0.00  0.00            
ATOM   2753  HW1 HOH X 902      25.633   6.949  32.794  0.00  0.00            
ATOM   2754  HW2 HOH X 902      24.962   7.270  34.112  0.00  0.00            
ATOM   2755  OW  HOH X 903      21.303  22.374  23.302  0.00  0.00            
ATOM   2756  HW1 HOH X 903      20.817  21.559  23.175  0.00  0.00            
ATOM   2757  HW2 HOH X 903      21.118  22.888  22.516  0.00  0.00            
ATOM   2758  OW  HOH X 904       8.658  19.911  34.410  0.00  0.00            
ATOM   2759  HW1 HOH X 904       8.752  20.863  34.419  0.00  0.00            
ATOM   2760  HW2 HOH X 904       7.753  19.762  34.137  0.00  0.00            
ATOM   2761  OW  HOH X 905      21.611  22.204  14.754  0.00  0.00            
ATOM   2762  HW1 HOH X 905      21.536  23.150  14.629  0.00  0.00            
ATOM   2763  HW2 HOH X 905      21.456  21.834  13.885  0.00  0.00            
ATOM   2764  OW  HOH X 906      22.736  13.756  32.156  0.00  0.00            
ATOM   2765  HW1 HOH X 906      23.293  12.978  32.127  0.00  0.00            
ATOM   2766  HW2 HOH X 906      21.942  13.465  32.606  0.00  0.00            
ATOM   2767  OW  HOH X 907      22.331  19.648   1.859  0.00  0.00            
ATOM   2768  HW1 HOH X 907      23.263  19.555   1.661  0.00  0.00            
ATOM   2769  HW2 HOH X 907      22.286  20.396   2.456  0.00  0.00            
ATOM   2770  OW  HOH X 908      28.364   1.300  37.916  0.00  0.00            
ATOM   2771  HW1 HOH X 908      29.092   1.644  37.399  0.00  0.00            
ATOM   2772  HW2 HOH X 908      28.327   0.370  37.692  0.00  0.00            
ATOM   2773  OW  HOH X 909      11.712  10.014  29.702  0.00  0.00            
ATOM   2774  HW1 HOH X 909      11.633   9.422  30.449  0.00  0.00            
ATOM   2775  HW2 HOH X 909      12.489   9.708  29.234  0.00  0.00            
ATOM   2776  OW  HOH X 910       8.676  28.864  26.781  0.00  0.00            
ATOM   2777  HW1 HOH X 910       9.177  29.249  27.500  0.00  0.00            
ATOM   2778  HW2 HOH X 910       8.277  29.614  26.338  0.00  0.00            
ATOM   2779  OW  HOH X 911      22.972  10.461  19.225  0.00  0.00            
ATOM   2780  HW1 HOH X 911      23.310  11.293  18.895  0.00  0.00            
ATOM   2781  HW2 HOH X 911      23.358  10.374  20.097  0.00  0.00            
ATOM   2782  OW  HOH X 912       3.328  24.021   1.204  0.00  0.00            
ATOM   2783  HW1 HOH X 912       3.172  24.165   0.271  0.00  0.00            
ATOM   2784  HW2 HOH X 912       2.590  24.448   1.640  0.00  0.00            
ATOM   2785  OW  HOH X 913      15.190   7.819  26.170  0.00  0.00            
ATOM   2786  HW1 HOH X 913      14.930   7.660  25.262  0.00  0.00            
ATOM   2787  HW2 HOH X 913      16.145   7.761  26.160  0.00  0.00            
ATOM   2788  OW  HOH X 914      13.499  10.950  26.432  0.00  0.00            
ATOM   2789  HW1 HOH X 914      13.662  10.121  26.883  0.00  0.00            
ATOM   2790  HW2 HOH X 914      13.901  10.838  25.571  0.00  0.00            
ATOM   2791  OW  HOH X 915      25.982  26.494  14.682  0.00  0.00            
ATOM   2792  HW1 HOH X 915      25.558  25.953  14.015  0.00  0.00            
ATOM   2793  HW2 HOH X 915      26.373  25.865  15.288  0.00  0.00            
ATOM   2794  OW  HOH X 916       9.297  21.940  39.626  0.00  0.00            
ATOM   2795  HW1 HOH X 916       9.889  22.583  40.016  0.00  0.00            
ATOM   2796  HW2 HOH X 916       9.401  21.158  40.167  0.00  0.00            
ATOM   2797  OW  HOH X 917      12.985   8.738  20.905  0.00  0.00            
ATOM   2798  HW1 HOH X 917      13.833   8.294  20.914  0.00  0.00            
ATOM   2799  HW2 HOH X 917      13.097   9.457  20.284  0.00  0.00            
ATOM   2800  OW  HOH X 918       5.786   5.666  11.574  0.00  0.00            
ATOM   2801  HW1 HOH X 918       4.918   6.036  11.413  0.00  0.00            
ATOM   2802  HW2 HOH X 918       6.390   6.279  11.155  0.00  0.00            
ATOM   2803  OW  HOH X 919      18.380   6.214  13.146  0.00  0.00            
ATOM   2804  HW1 HOH X 919      18.871   6.813  12.583  0.00  0.00            
ATOM   2805  HW2 HOH X 919      18.846   5.381  13.075  0.00  0.00            
ATOM   2806  OW  HOH X 920      20.380  26.526  25.926  0.00  0.00            
ATOM   2807  HW1 HOH X 920      21.188  26.130  26.253  0.00  0.00            
ATOM   2808  HW2 HOH X 920      19.697  26.189  26.505  0.00  0.00            
ATOM   2809  OW  HOH X 921      17.273  14.562  36.268  0.00  0.00            
ATOM   2810  HW1 HOH X 921      18.136  14.446  35.870  0.00  0.00            
ATOM   2811  HW2 HOH X 921      17.407  15.228  36.942  0.00  0.00            
ATOM   2812  OW  HOH X 922      10.307   2.657  20.851  0.00  0.00            
ATOM   2813  HW1 HOH X 922      10.367   3.228  21.616  0.00  0.00            
ATOM   2814  HW2 HOH X 922       9.371   2.476  20.758  0.00  0.00            
ATOM   2815  OW  HOH X 923      24.291  18.665  33.801  0.00  0.00            
ATOM   2816  HW1 HOH X 923      24.097  17.746  33.982  0.00  0.00            
ATOM   2817  HW2 HOH X 923      23.849  19.147  34.500  0.00  0.00            
ATOM   2818  OW  HOH X 924      25.187   0.567  32.018  0.00  0.00            
ATOM   2819  HW1 HOH X 924      25.535  -0.325  32.031  0.00  0.00            
ATOM   2820  HW2 HOH X 924      25.684   1.029  32.693  0.00  0.00            
ATOM   2821  OW  HOH X 925       9.212  11.328  29.287  0.00  0.00            
ATOM   2822  HW1 HOH X 925       8.627  10.984  29.962  0.00  0.00            
ATOM   2823  HW2 HOH X 925      10.063  10.937  29.486  0.00  0.00            
ATOM   2824  OW  HOH X 926       1.759  27.307  20.747  0.00  0.00            
ATOM   2825  HW1 HOH X 926       1.271  27.453  19.937  0.00  0.00            
ATOM   2826  HW2 HOH X 926       2.452  26.693  20.502  0.00  0.00            
ATOM   2827  OW  HOH X 927      20.772  27.426  33.338  0.00  0.00            
ATOM   2828  HW1 HOH X 927      21.699  27.502  33.111  0.00  0.00            
ATOM   2829  HW2 HOH X 927      20.343  27.187  32.517  0.00  0.00            
ATOM   2830  OW  HOH X 928       8.192   2.549  17.308  0.00  0.00            
ATOM   2831  HW1 HOH X 928       7.246   2.656  17.403  0.00  0.00            
ATOM   2832  HW2 HOH X 928       8.396   2.958  16.466  0.00  0.00            
ATOM   2833  OW  HOH X 929      24.966  13.028  12.304  0.00  0.00            
ATOM   2834  HW1 HOH X 929      25.561  13.389  11.647  0.00  0.00            
ATOM   2835  HW2 HOH X 929      25.148  12.089  12.303  0.00  0.00            
ATOM   2836  OW  HOH X 930       8.590  18.381   7.873  0.00  0.00            
ATOM   2837  HW1 HOH X 930       9.345  18.552   8.435  0.00  0.00            
ATOM   2838  HW2 HOH X 930       8.593  17.432   7.749  0.00  0.00            
ATOM   2839  OW  HOH X 931       8.293  22.645  37.175  0.00  0.00            
ATOM   2840  HW1 HOH X 931       8.741  22.470  38.002  0.00  0.00            
ATOM   2841  HW2 HOH X 931       7.369  22.715  37.412  0.00  0.00            
ATOM   2842  OW  HOH X 932       0.253   1.252  20.624  0.00  0.00            
ATOM   2843  HW1 HOH X 932      -0.692   1.400  20.633  0.00  0.00            
ATOM   2844  HW2 HOH X 932       0.443   0.863  21.478  0.00  0.00            
ATOM   2845  OW  HOH X 933      19.575  11.528  13.738  0.00  0.00            
ATOM   2846  HW1 HOH X 933      20.519  11.664  13.656  0.00  0.00            
ATOM   2847  HW2 HOH X 933      19.491  10.766  14.311  0.00  0.00            
ATOM   2848  OW  HOH X 934       4.040  12.386   1.806  0.00  0.00            
ATOM   2849  HW1 HOH X 934       3.765  12.366   2.723  0.00  0.00            
ATOM   2850  HW2 HOH X 934       3.238  12.573   1.319  0.00  0.00            
ATOM   2851  OW  HOH X 935       5.707   2.136   7.061  0.00  0.00            
ATOM   2852  HW1 HOH X 935       5.088   2.446   7.722  0.00  0.00            
ATOM   2853  HW2 HOH X 935       6.359   2.834   6.997  0.00  0.00            
ATOM   2854  OW  HOH X 936       7.692  21.111  26.693  0.00  0.00            
ATOM   2855  HW1 HOH X 936       7.203  20.857  25.910  0.00  0.00            
ATOM   2856  HW2 HOH X 936       8.601  20.895  26.488  0.00  0.00            
ATOM   2857  OW  HOH X 937      21.456  26.356  16.495  0.00  0.00            
ATOM   2858  HW1 HOH X 937      21.285  26.511  15.566  0.00  0.00            
ATOM   2859  HW2 HOH X 937      20.940  27.023  16.948  0.00  0.00            
ATOM   2860  OW  HOH X 938      19.700  14.057   9.360  0.00  0.00            
ATOM   2861  HW1 HOH X 938      19.594  13.136   9.601  0.00  0.00            
ATOM   2862  HW2 HOH X 938      20.195  14.035   8.541  0.00  0.00            
ATOM   2863  OW  HOH X 939      27.798   4.130  34.966  0.00  0.00            
ATOM   2864  HW1 HOH X 939      27.249   3.373  34.758  0.00  0.00            
ATOM   2865  HW2 HOH X 939      27.267   4.654  35.566  0.00  0.00            
ATOM   2866  OW  HOH X 940      24.030  25.345   4.294  0.00  0.00            
ATOM   2867  HW1 HOH X 940      23.170  25.099   3.953  0.00  0.00            
ATOM   2868  HW2 HOH X 940      23.838  25.858   5.079  0.00  0.00            
ATOM   2869  OW  HOH X 941      18.192  20.954   5.245  0.00  0.00            
ATOM   2870  HW1 HOH X 941      18.771  20.877   4.486  0.00  0.00            
ATOM   2871  HW2 HOH X 941      17.645  20.169   5.210  0.00  0.00            
ATOM   2872  OW  HOH X 942       7.091   0.353  30.507  0.00  0.00            
ATOM   2873  HW1 HOH X 942       7.197  -0.487  30.060  0.00  0.00            
ATOM   2874  HW2 HOH X 942       6.144   0.484  30.549  0.00  0.00            
ATOM   2875  OW  HOH X 943      16.565   5.640  25.025  0.00  0.00            
ATOM   2876  HW1 HOH X 943      15.999   5.782  25.783  0.00  0.00            
ATOM   2877  HW2 HOH X 943      16.603   4.689  24.928  0.00  0.00            
ATOM   2878  OW  HOH X 944      15.973  18.355  33.388  0.00  0.00            
ATOM   2879  HW1 HOH X 944      16.257  17.483  33.663  0.00  0.00            
ATOM   2880  HW2 HOH X 944      16.126  18.371  32.443  0.00  0.00            
ATOM   2881  OW  HOH X 945       2.116   2.457  23.213  0.00  0.00            
ATOM   2882  HW1 HOH X 945       2.062   3.401  23.064  0.00  0.00            
ATOM   2883  HW2 HOH X 945       2.909   2.342  23.736  0.00  0.00            
ATOM   2884  OW  HOH X 946       3.583  11.575  15.451  0.00  0.00            
ATOM   2885  HW1 HOH X 946       4.358  11.481  16.006  0.00  0.00            
ATOM   2886  HW2 HOH X 946       3.762  11.019  14.693  0.00  0.00            
ATOM   2887  OW  HOH X 947       6.589  22.620   4.518  0.00  0.00            
ATOM   2888  HW1 HOH X 947       7.225  22.927   3.873  0.00  0.00            
ATOM   2889  HW2 HOH X 947       5.750  22.962   4.210  0.00  0.00            
ATOM   2890  OW  HOH X 948      27.652   3.524  14.980  0.00  0.00            
ATOM   2891  HW1 HOH X 948      28.016   3.389  14.105  0.00  0.00            
ATOM   2892  HW2 HOH X 948      27.540   2.642  15.333  0.00  0.00            
ATOM   2893  OW  HOH X 949       2.904  24.300  28.531  0.00  0.00            
ATOM   2894  HW1 HOH X 949       3.253  25.142  28.239  0.00  0.00            
ATOM   2895  HW2 HOH X 949       3.019  23.719  27.780  0.00  0.00            
ATOM   2896  OW  HOH X 950      25.921  18.392  13.597  0.00  0.00            
ATOM   2897  HW1 HOH X 950      26.188  17.477  13.508  0.00  0.00            
ATOM   2898  HW2 HOH X 950      25.055  18.430  13.191  0.00  0.00            
ATOM   2899  OW  HOH X 951       2.693  21.036  22.280  0.00  0.00            
ATOM   2900  HW1 HOH X 951       2.716  20.496  23.070  0.00  0.00            
ATOM   2901  HW2 HOH X 951       3.331  20.630  21.693  0.00  0.00            
ATOM   2902  OW  HOH X 952      14.471  27.199  34.910  0.00  0.00            
ATOM   2903  HW1 HOH X 952      13.590  27.324  34.558  0.00  0.00            
ATOM   2904  HW2 HOH X 952      14.580  26.249  34.953  0.00  0.00            
ATOM   2905  OW  HOH X 953      28.502  20.533  36.439  0.00  0.00            
ATOM   2906  HW1 HOH X 953      29.208  20.797  35.850  0.00  0.00            
ATOM   2907  HW2 HOH X 953      27.730  20.993  36.109  0.00  0.00            
ATOM   2908  OW  HOH X 954      13.996  18.575  14.926  0.00  0.00            
ATOM   2909  HW1 HOH X 954      14.340  19.002  14.142  0.00  0.00            
ATOM   2910  HW2 HOH X 954      13.643  17.743  14.610  0.00  0.00            
ATOM   2911  OW  HOH X 955      29.120   8.530   4.206  0.00  0.00            
ATOM   2912  HW1 HOH X 955      28.338   8.172   3.788  0.00  0.00            
ATOM   2913  HW2 HOH X 955      29.808   7.892   4.016  0.00  0.00            
ATOM   2914  OW  HOH X 956      21.885   9.661   1.341  0.00  0.00            
ATOM   2915  HW1 HOH X 956      22.451   9.650   0.569  0.00  0.00            
ATOM   2916  HW2 HOH X 956      21.417   8.827   1.308  0.00  0.00            
ATOM   2917  OW  HOH X 957      22.111  21.584   3.803  0.00  0.00            
ATOM   2918  HW1 HOH X 957      21.219  21.347   4.059  0.00  0.00            
ATOM   2919  HW2 HOH X 957      22.099  22.540   3.750  0.00  0.00            
ATOM   2920  OW  HOH X 958       6.156  10.624   2.123  0.00  0.00            
ATOM   2921  HW1 HOH X 958       5.907  10.079   2.869  0.00  0.00            
ATOM   2922  HW2 HOH X 958       5.353  11.090   1.888  0.00  0.00            
ATOM   2923  OW  HOH X 959      11.729  11.967  20.856  0.00  0.00            
ATOM   2924  HW1 HOH X 959      12.469  11.383  20.690  0.00  0.00            
ATOM   2925  HW2 HOH X 959      11.754  12.597  20.135  0.00  0.00            
ATOM   2926  OW  HOH X 960      19.822  18.643  13.504  0.00  0.00            
ATOM   2927  HW1 HOH X 960      20.621  18.673  14.030  0.00  0.00            
ATOM   2928  HW2 HOH X 960      20.131  18.540  12.604  0.00  0.00            
ATOM   2929  OW  HOH X 961      18.289  26.058  39.944  0.00  0.00            
ATOM   2930  HW1 HOH X 961      18.827  25.804  39.194  0.00  0.00            
ATOM   2931  HW2 HOH X 961      17.652  26.676  39.584  0.00  0.00            
ATOM   2932  OW  HOH X 962      16.085   2.651  24.831  0.00  0.00            
ATOM   2933  HW1 HOH X 962      16.610   2.433  25.601  0.00  0.00            
ATOM   2934  HW2 HOH X 962      15.415   1.968  24.796  0.00  0.00            
ATOM   2935  OW  HOH X 963       4.992  11.218  29.816  0.00  0.00            
ATOM   2936  HW1 HOH X 963       5.069  12.031  30.316  0.00  0.00            
ATOM   2937  HW2 HOH X 963       4.611  10.593  30.432  0.00  0.00            
ATOM   2938  OW  HOH X 964      19.426  26.514  31.298  0.00  0.00            
ATOM   2939  HW1 HOH X 964      19.035  26.730  30.452  0.00  0.00            
ATOM   2940  HW2 HOH X 964      18.690  26.516  31.910  0.00  0.00            
ATOM   2941  OW  HOH X 965      15.358   8.310  16.111  0.00  0.00            
ATOM   2942  HW1 HOH X 965      16.220   7.940  16.302  0.00  0.00            
ATOM   2943  HW2 HOH X 965      15.343   8.403  15.158  0.00  0.00            
ATOM   2944  OW  HOH X 966      14.987  14.460  38.335  0.00  0.00            
ATOM   2945  HW1 HOH X 966      14.740  14.162  37.460  0.00  0.00            
ATOM   2946  HW2 HOH X 966      15.362  15.330  38.196  0.00  0.00            
ATOM   2947  OW  HOH X 967      11.451  16.526   8.384  0.00  0.00            
ATOM   2948  HW1 HOH X 967      11.917  15.710   8.200  0.00  0.00            
ATOM   2949  HW2 HOH X 967      10.611  16.245   8.748  0.00  0.00            
ATOM   2950  OW  HOH X 968      16.745  28.388   3.595  0.00  0.00            
ATOM   2951  HW1 HOH X 968      16.223  27.956   2.919  0.00  0.00            
ATOM   2952  HW2 HOH X 968      17.165  29.119   3.143  0.00  0.00            
ATOM   2953  OW  HOH X 969      26.168  10.455  24.092  0.00  0.00            
ATOM   2954  HW1 HOH X 969      25.226  10.496  23.931  0.00  0.00            
ATOM   2955  HW2 HOH X 969      26.549  11.047  23.444  0.00  0.00            
ATOM   2956  OW  HOH X 970       9.947   2.378  26.621  0.00  0.00            
ATOM   2957  HW1 HOH X 970       9.607   1.951  25.835  0.00  0.00            
ATOM   2958  HW2 HOH X 970       9.756   1.764  27.330  0.00  0.00            
ATOM   2959  OW  HOH X 971      16.140  22.984   3.155  0.00  0.00            
ATOM   2960  HW1 HOH X 971      16.650  22.810   2.363  0.00  0.00            
ATOM   2961  HW2 HOH X 971      16.628  22.550   3.855  0.00  0.00            
ATOM   2962  OW  HOH X 972      19.696  25.152  37.955  0.00  0.00            
ATOM   2963  HW1 HOH X 972      20.424  24.545  38.092  0.00  0.00            
ATOM   2964  HW2 HOH X 972      19.973  25.696  37.218  0.00  0.00            
ATOM   2965  OW  HOH X 973      10.553  15.374  18.231  0.00  0.00            
ATOM   2966  HW1 HOH X 973      11.218  14.742  18.504  0.00  0.00            
ATOM   2967  HW2 HOH X 973       9.726  14.998  18.535  0.00  0.00            
ATOM   2968  OW  HOH X 974      29.235   2.040   5.759  0.00  0.00            
ATOM   2969  HW1 HOH X 974      28.371   2.000   5.349  0.00  0.00            
ATOM   2970  HW2 HOH X 974      29.329   1.198   6.204  0.00  0.00            
ATOM   2971  OW  HOH X 975      23.456  13.413  23.665  0.00  0.00            
ATOM   2972  HW1 HOH X 975      24.188  13.050  23.165  0.00  0.00            
ATOM   2973  HW2 HOH X 975      22.675  13.074  23.227  0.00  0.00            
ATOM   2974  OW  HOH X 976      13.457  24.701  24.210  0.00  0.00            
ATOM   2975  HW1 HOH X 976      13.167  23.790  24.251  0.00  0.00            
ATOM   2976  HW2 HOH X 976      12.862  25.114  23.584  0.00  0.00            
ATOM   2977  OW  HOH X 977      21.817  21.381  17.478  0.00  0.00            
ATOM   2978  HW1 HOH X 977      21.344  22.156  17.783  0.00  0.00            
ATOM   2979  HW2 HOH X 977      21.940  21.529  16.541  0.00  0.00            
ATOM   2980  OW  HOH X 978       8.290   7.026  11.273  0.00  0.00            
ATOM   2981  HW1 HOH X 978       9.000   7.352  11.826  0.00  0.00            
ATOM   2982  HW2 HOH X 978       8.086   7.756  10.688  0.00  0.00            
ATOM   2983  OW  HOH X 979      22.053   7.539  20.766  0.00  0.00            
ATOM   2984  HW1 HOH X 979      22.168   6.900  20.063  0.00  0.00            
ATOM   2985  HW2 HOH X 979      21.320   8.083  20.478  0.00  0.00            
ATOM   2986  OW  HOH X 980      10.043  24.586  36.505  0.00  0.00            
ATOM   2987  HW1 HOH X 980       9.531  23.841  36.821  0.00  0.00            
ATOM   2988  HW2 HOH X 980      10.943  24.384  36.759  0.00  0.00            
ATOM   2989  OW  HOH X 981      27.680   1.290   9.602  0.00  0.00            
ATOM   2990  HW1 HOH X 981      27.489   1.916   8.903  0.00  0.00            
ATOM   2991  HW2 HOH X 981      26.953   0.668   9.572  0.00  0.00            
ATOM   2992  OW  HOH X 982       9.321  24.851   5.688  0.00  0.00            
ATOM   2993  HW1 HOH X 982      10.198  24.490   5.819  0.00  0.00            
ATOM   2994  HW2 HOH X 982       8.749  24.289   6.212  0.00  0.00            
ATOM   2995  OW  HOH X 983       2.228  17.446  36.097  0.00  0.00            
ATOM   2996  HW1 HOH X 983       2.826  17.349  35.356  0.00  0.00            
ATOM   2997  HW2 HOH X 983       1.363  17.539  35.697  0.00  0.00            
ATOM   2998  OW  HOH X 984      21.563  29.312   2.820  0.00  0.00            
ATOM   2999  HW1 HOH X 984      22.406  28.908   3.024  0.00  0.00            
ATOM   3000  HW2 HOH X 984      21.168  28.728   2.172  0.00  0.00            
ATOM   3001  OW  HOH X 985       8.804   1.810  31.844  0.00  0.00            
ATOM   3002  HW1 HOH X 985       8.593   2.743  31.882  0.00  0.00            
ATOM   3003  HW2 HOH X 985       8.107   1.428  31.310  0.00  0.00            
ATOM   3004  OW  HOH X 986      24.972  22.355  21.710  0.00  0.00            
ATOM   3005  HW1 HOH X 986      24.194  22.057  21.239  0.00  0.00            
ATOM   3006  HW2 HOH X 986      24.793  22.144  22.626  0.00  0.00            
ATOM   3007  OW  HOH X 987      25.549  10.449  11.579  0.00  0.00            
ATOM   3008  HW1 HOH X 987      25.200  10.201  10.723  0.00  0.00            
ATOM   3009  HW2 HOH X 987      25.474   9.655  12.108  0.00  0.00            
ATOM   3010  OW  HOH X 988       3.772  22.700  30.641  0.00  0.00            
ATOM   3011  HW1 HOH X 988       3.762  23.291  31.394  0.00  0.00            
ATOM   3012  HW2 HOH X 988       3.364  23.202  29.936  0.00  0.00            
ATOM   3013  OW  HOH X 989       5.338  15.620   7.514  0.00  0.00            
ATOM   3014  HW1 HOH X 989       4.394  15.717   7.639  0.00  0.00            
ATOM   3015  HW2 HOH X 989       5.429  15.306   6.614  0.00  0.00            
ATOM   3016  OW  HOH X 990       2.768  29.175   0.359  0.00  0.00            
ATOM   3017  HW1 HOH X 990       3.503  29.439  -0.194  0.00  0.00            
ATOM   3018  HW2 HOH X 990       2.337  29.997   0.593  0.00  0.00            
ATOM   3019  OW  HOH X 991      27.726  14.074   3.492  0.00  0.00            
ATOM   3020  HW1 HOH X 991      27.488  14.927   3.128  0.00  0.00            
ATOM   3021  HW2 HOH X 991      27.353  13.440   2.880  0.00  0.00            
ATOM   3022  OW  HOH X 992       5.415  27.722  18.896  0.00  0.00            
ATOM   3023  HW1 HOH X 992       5.440  28.599  18.512  0.00  0.00            
ATOM   3024  HW2 HOH X 992       5.086  27.162  18.193  0.00  0.00            
ATOM   3025  OW  HOH X 993      12.006   7.089  39.716  0.00  0.00            
ATOM   3026  HW1 HOH X 993      11.051   7.025  39.714  0.00  0.00            
ATOM   3027  HW2 HOH X 993      12.269   6.767  38.854  0.00  0.00            
ATOM   3028  OW  HOH X 994      12.370  28.768   1.687  0.00  0.00            
ATOM   3029  HW1 HOH X 994      13.031  28.807   2.378  0.00  0.00            
ATOM   3030  HW2 HOH X 994      11.783  29.501   1.874  0.00  0.00            
ATOM   3031  OW  HOH X 995       4.456   1.696  31.009  0.00  0.00            
ATOM   3032  HW1 HOH X 995       4.505   2.444  31.604  0.00  0.00            
ATOM   3033  HW2 HOH X 995       3.770   1.931  30.384  0.00  0.00            
ATOM   3034  OW  HOH X 996       2.118  18.741  23.834  0.00  0.00            
ATOM   3035  HW1 HOH X 996       1.319  19.028  23.393  0.00  0.00            
ATOM   3036  HW2 HOH X 996       1.876  18.689  24.759  0.00  0.00            
ATOM   3037  OW  HOH X 997      10.962  20.008  28.292  0.00  0.00            
ATOM   3038  HW1 HOH X 997      11.761  19.766  28.761  0.00  0.00            
ATOM   3039  HW2 HOH X 997      10.262  19.895  28.935  0.00  0.00            
ATOM   3040  OW  HOH X 998      20.391   9.084  25.321  0.00  0.00            
ATOM   3041  HW1 HOH X 998      19.548   9.524  25.211  0.00  0.00            
ATOM   3042  HW2 HOH X 998      20.173   8.152  25.349  0.00  0.00            
ATOM   3043  OW  HOH X 999       6.444  12.205   5.649  0.00  0.00            
ATOM   3044  HW1 HOH X 999       6.793  13.096   5.627  0.00  0.00            
ATOM   3045  HW2 HOH X 999       7.132  11.668   5.253  0.00  0.00            
ATOM   3046  OW  HOH X1000      19.824   1.622   2.234  0.00  0.00            
ATOM   3047  HW1 HOH X1000      19.062   1.042   2.252  0.00  0.00            
ATOM   3048  HW2 HOH X1000      20.573   1.038   2.352  0.00  0.00            
ATOM   3049  OW  HOH X1001      14.785  21.721  37.343  0.00  0.00            
ATOM   3050  HW1 HOH X1001      14.139  22.301  36.942  0.00  0.00            
ATOM   3051  HW2 HOH X1001      14.765  20.930  36.804  0.00  0.00            
ATOM   3052  OW  HOH X1002      26.960  22.774  19.481  0.00  0.00            
ATOM   3053  HW1 HOH X1002      26.819  23.720  19.513  0.00  0.00            
ATOM   3054  HW2 HOH X1002      26.418  22.426  20.189  0.00  0.00            
ATOM   3055  OW  HOH X1003      12.001  24.373   5.598  0.00  0.00            
ATOM   3056  HW1 HOH X1003      11.887  23.487   5.255  0.00  0.00            
ATOM   3057  HW2 HOH X1003      12.697  24.751   5.061  0.00  0.00            
ATOM   3058  OW  HOH X1004       3.034   3.400  36.251  0.00  0.00            
ATOM   3059  HW1 HOH X1004       3.391   3.251  37.126  0.00  0.00            
ATOM   3060  HW2 HOH X1004       2.085   3.351  36.367  0.00  0.00            
ATOM   3061  OW  HOH X1005       0.269  11.131  30.774  0.00  0.00            
ATOM   3062  HW1 HOH X1005       1.200  11.353  30.776  0.00  0.00            
ATOM   3063  HW2 HOH X1005      -0.151  11.860  30.318  0.00  0.00            
ATOM   3064  OW  HOH X1006      11.665  10.142  14.841  0.00  0.00            
ATOM   3065  HW1 HOH X1006      11.962  10.968  15.222  0.00  0.00            
ATOM   3066  HW2 HOH X1006      11.324   9.644  15.584  0.00  0.00            
ATOM   3067  OW  HOH X1007       6.741   6.200  24.391  0.00  0.00            
ATOM   3068  HW1 HOH X1007       7.263   6.228  23.589  0.00  0.00            
ATOM   3069  HW2 HOH X1007       7.350   5.898  25.064  0.00  0.00            
ATOM   3070  OW  HOH X1008      19.843  11.380   4.863  0.00  0.00            
ATOM   3071  HW1 HOH X1008      19.392  11.190   4.041  0.00  0.00            
ATOM   3072  HW2 HOH X1008      19.146  11.638   5.466  0.00  0.00            
ATOM   3073  OW  HOH X1009      28.776  23.398  22.368  0.00  0.00            
ATOM   3074  HW1 HOH X1009      28.099  23.655  22.994  0.00  0.00            
ATOM   3075  HW2 HOH X1009      28.719  22.443  22.331  0.00  0.00            
ATOM   3076  OW  HOH X1010      19.006  23.954  15.646  0.00  0.00            
ATOM   3077  HW1 HOH X1010      19.794  23.604  16.062  0.00  0.00            
ATOM   3078  HW2 HOH X1010      18.595  24.490  16.325  0.00  0.00            
ATOM   3079  OW  HOH X1011      19.583   8.936  30.503  0.00  0.00            
ATOM   3080  HW1 HOH X1011      18.761   8.808  30.977  0.00  0.00            
ATOM   3081  HW2 HOH X1011      19.405   8.607  29.622  0.00  0.00            
ATOM   3082  OW  HOH X1012      22.314   4.071  20.123  0.00  0.00            
ATOM   3083  HW1 HOH X1012      21.438   4.457  20.115  0.00  0.00            
ATOM   3084  HW2 HOH X1012      22.907   4.819  20.056  0.00  0.00            
ATOM   3085  OW  HOH X1013      15.592  15.037  30.034  0.00  0.00            
ATOM   3086  HW1 HOH X1013      15.200  15.510  29.300  0.00  0.00            
ATOM   3087  HW2 HOH X1013      15.664  14.133  29.726  0.00  0.00            
ATOM   3088  OW  HOH X1014       2.434  28.814  12.400  0.00  0.00            
ATOM   3089  HW1 HOH X1014       1.637  29.308  12.207  0.00  0.00            
ATOM   3090  HW2 HOH X1014       2.777  28.567  11.541  0.00  0.00            
ATOM   3091  OW  HOH X1015       5.845   7.606  37.528  0.00  0.00            
ATOM   3092  HW1 HOH X1015       5.412   6.999  36.927  0.00  0.00            
ATOM   3093  HW2 HOH X1015       5.508   8.467  37.283  0.00  0.00            
ATOM   3094  OW  HOH X1016      17.778  23.125  29.425  0.00  0.00            
ATOM   3095  HW1 HOH X1016      17.572  22.565  30.174  0.00  0.00            
ATOM   3096  HW2 HOH X1016      16.935  23.269  28.995  0.00  0.00            
ATOM   3097  OW  HOH X1017       3.032   1.288  16.868  0.00  0.00            
ATOM   3098  HW1 HOH X1017       3.624   2.032  16.756  0.00  0.00            
ATOM   3099  HW2 HOH X1017       3.317   0.653  16.210  0.00  0.00            
ATOM   3100  OW  HOH X1018       2.028   9.906  26.113  0.00  0.00            
ATOM   3101  HW1 HOH X1018       2.337   9.652  26.982  0.00  0.00            
ATOM   3102  HW2 HOH X1018       2.447  10.751  25.947  0.00  0.00            
ATOM   3103  OW  HOH X1019      10.218  12.535  32.852  0.00  0.00            
ATOM   3104  HW1 HOH X1019      10.256  11.671  33.262  0.00  0.00            
ATOM   3105  HW2 HOH X1019      10.350  13.149  33.574  0.00  0.00            
ATOM   3106  OW  HOH X1020       1.680  19.208  18.475  0.00  0.00            
ATOM   3107  HW1 HOH X1020       1.240  18.473  18.901  0.00  0.00            
ATOM   3108  HW2 HOH X1020       1.585  19.935  19.090  0.00  0.00            
ATOM   3109  OW  HOH X1021      11.378  17.922  38.283  0.00  0.00            
ATOM   3110  HW1 HOH X1021      11.209  17.152  38.826  0.00  0.00            
ATOM   3111  HW2 HOH X1021      10.596  18.007  37.737  0.00  0.00            
ATOM   3112  OW  HOH X1022      23.981  27.017  11.651  0.00  0.00            
ATOM   3113  HW1 HOH X1022      23.426  27.657  11.207  0.00  0.00            
ATOM   3114  HW2 HOH X1022      24.709  27.532  12.000  0.00  0.00            
ATOM   3115  OW  HOH X1023      19.100   0.844  29.784  0.00  0.00            
ATOM   3116  HW1 HOH X1023      19.371   0.627  30.676  0.00  0.00            
ATOM   3117  HW2 HOH X1023      18.191   1.131  29.873  0.00  0.00            
ATOM   3118  OW  HOH X1024      25.717  11.891  27.484  0.00  0.00            
ATOM   3119  HW1 HOH X1024      25.701  10.977  27.767  0.00  0.00            
ATOM   3120  HW2 HOH X1024      24.967  12.292  27.924  0.00  0.00            
ATOM   3121  OW  HOH X1025       7.471   2.801  21.138  0.00  0.00            
ATOM   3122  HW1 HOH X1025       7.556   3.705  20.834  0.00  0.00            
ATOM   3123  HW2 HOH X1025       6.541   2.600  21.035  0.00  0.00            
ATOM   3124  OW  HOH X1026       5.176  29.173  24.966  0.00  0.00            
ATOM   3125  HW1 HOH X1026       5.408  28.255  24.831  0.00  0.00            
ATOM   3126  HW2 HOH X1026       4.418  29.316  24.400  0.00  0.00            
ATOM   3127  OW  HOH X1027      15.248   4.905  38.519  0.00  0.00            
ATOM   3128  HW1 HOH X1027      14.949   4.029  38.272  0.00  0.00            
ATOM   3129  HW2 HOH X1027      14.825   5.489  37.890  0.00  0.00            
ATOM   3130  OW  HOH X1028       8.747  17.290  32.228  0.00  0.00            
ATOM   3131  HW1 HOH X1028       8.996  16.862  33.047  0.00  0.00            
ATOM   3132  HW2 HOH X1028       7.951  17.776  32.444  0.00  0.00            
ATOM   3133  OW  HOH X1029      30.246  25.456  39.506  0.00  0.00            
ATOM   3134  HW1 HOH X1029      30.280  25.092  40.391  0.00  0.00            
ATOM   3135  HW2 HOH X1029      29.342  25.316  39.224  0.00  0.00            
ATOM   3136  OW  HOH X1030      15.490   3.344  13.074  0.00  0.00            
ATOM   3137  HW1 HOH X1030      14.719   2.789  12.958  0.00  0.00            
ATOM   3138  HW2 HOH X1030      15.141   4.179  13.386  0.00  0.00            
ATOM   3139  OW  HOH X1031      10.672   0.847  24.112  0.00  0.00            
ATOM   3140  HW1 HOH X1031      10.989   1.660  23.718  0.00  0.00            
ATOM   3141  HW2 HOH X1031      10.016   0.521  23.495  0.00  0.00            
ATOM   3142  OW  HOH X1032      19.695   0.876  19.667  0.00  0.00            
ATOM   3143  HW1 HOH X1032      20.055   0.277  19.013  0.00  0.00            
ATOM   3144  HW2 HOH X1032      18.950   0.405  20.040  0.00  0.00            
ATOM   3145  OW  HOH X1033       4.054  17.612  19.054  0.00  0.00            
ATOM   3146  HW1 HOH X1033       3.400  16.920  19.154  0.00  0.00            
ATOM   3147  HW2 HOH X1033       4.842  17.259  19.468  0.00  0.00            
ATOM   3148  OW  HOH X1034      17.755   8.785  13.311  0.00  0.00            
ATOM   3149  HW1 HOH X1034      18.521   9.125  13.772  0.00  0.00            
ATOM   3150  HW2 HOH X1034      17.852   7.833  13.353  0.00  0.00            
ATOM   3151  OW  HOH X1035       2.370   9.309  18.904  0.00  0.00            
ATOM   3152  HW1 HOH X1035       3.104   9.656  19.410  0.00  0.00            
ATOM   3153  HW2 HOH X1035       2.122  10.024  18.319  0.00  0.00            
ATOM   3154  OW  HOH X1036      28.987  19.380  15.762  0.00  0.00            
ATOM   3155  HW1 HOH X1036      29.286  19.601  16.644  0.00  0.00            
ATOM   3156  HW2 HOH X1036      28.079  19.682  15.734  0.00  0.00            
ATOM   3157  OW  HOH X1037      24.867  10.054   2.956  0.00  0.00            
ATOM   3158  HW1 HOH X1037      25.011  10.605   3.726  0.00  0.00            
ATOM   3159  HW2 HOH X1037      23.952   9.781   3.024  0.00  0.00            
ATOM   3160  OW  HOH X1038       2.442  18.102  10.781  0.00  0.00            
ATOM   3161  HW1 HOH X1038       1.573  17.710  10.693  0.00  0.00            
ATOM   3162  HW2 HOH X1038       3.045  17.360  10.737  0.00  0.00            
ATOM   3163  OW  HOH X1039      22.338  12.472   2.353  0.00  0.00            
ATOM   3164  HW1 HOH X1039      22.181  11.592   2.694  0.00  0.00            
ATOM   3165  HW2 HOH X1039      21.575  12.977   2.632  0.00  0.00            
ATOM   3166  OW  HOH X1040      19.778   7.741  11.491  0.00  0.00            
ATOM   3167  HW1 HOH X1040      19.685   7.749  10.538  0.00  0.00            
ATOM   3168  HW2 HOH X1040      20.653   8.096  11.650  0.00  0.00            
ATOM   3169  OW  HOH X1041       9.578  19.870  14.367  0.00  0.00            
ATOM   3170  HW1 HOH X1041       9.300  20.716  14.719  0.00  0.00            
ATOM   3171  HW2 HOH X1041      10.004  20.085  13.537  0.00  0.00            
ATOM   3172  OW  HOH X1042       0.768  21.507   6.488  0.00  0.00            
ATOM   3173  HW1 HOH X1042       0.380  20.929   5.831  0.00  0.00            
ATOM   3174  HW2 HOH X1042       0.406  21.200   7.320  0.00  0.00            
ATOM   3175  OW  HOH X1043      14.381  16.747  19.176  0.00  0.00            
ATOM   3176  HW1 HOH X1043      14.034  17.447  18.622  0.00  0.00            
ATOM   3177  HW2 HOH X1043      14.288  17.080  20.069  0.00  0.00            
ATOM   3178  OW  HOH X1044       6.479   4.613  38.282  0.00  0.00            
ATOM   3179  HW1 HOH X1044       6.341   4.668  39.227  0.00  0.00            
ATOM   3180  HW2 HOH X1044       7.334   5.019  38.140  0.00  0.00            
ATOM   3181  OW  HOH X1045      20.793  28.167  23.511  0.00  0.00            
ATOM   3182  HW1 HOH X1045      21.248  27.489  23.012  0.00  0.00            
ATOM   3183  HW2 HOH X1045      20.676  27.786  24.381  0.00  0.00            
ATOM   3184  OW  HOH X1046      23.954  20.853  14.837  0.00  0.00            
ATOM   3185  HW1 HOH X1046      24.652  21.406  14.486  0.00  0.00            
ATOM   3186  HW2 HOH X1046      23.197  21.435  14.903  0.00  0.00            
ATOM   3187  OW  HOH X1047      22.154   5.984  36.320  0.00  0.00            
ATOM   3188  HW1 HOH X1047      23.080   6.173  36.168  0.00  0.00            
ATOM   3189  HW2 HOH X1047      22.052   6.033  37.271  0.00  0.00            
ATOM   3190  OW  HOH X1048      10.698  17.059  22.183  0.00  0.00            
ATOM   3191  HW1 HOH X1048      11.121  16.276  21.830  0.00  0.00            
ATOM   3192  HW2 HOH X1048      11.013  17.773  21.629  0.00  0.00            
ATOM   3193  OW  HOH X1049      28.499  18.924  30.211  0.00  0.00            
ATOM   3194  HW1 HOH X1049      29.399  19.096  29.935  0.00  0.00            
ATOM   3195  HW2 HOH X1049      28.511  18.016  30.516  0.00  0.00            
ATOM   3196  OW  HOH X1050      22.704   8.507  16.953  0.00  0.00            
ATOM   3197  HW1 HOH X1050      21.891   8.015  17.073  0.00  0.00            
ATOM   3198  HW2 HOH X1050      22.623   9.253  17.547  0.00  0.00            
ATOM   3199  OW  HOH X1051      20.373   9.817  35.355  0.00  0.00            
ATOM   3200  HW1 HOH X1051      19.604  10.230  34.961  0.00  0.00            
ATOM   3201  HW2 HOH X1051      20.130   8.895  35.445  0.00  0.00            
ATOM   3202  OW  HOH X1052       8.495  22.092  31.565  0.00  0.00            
ATOM   3203  HW1 HOH X1052       7.653  21.860  31.173  0.00  0.00            
ATOM   3204  HW2 HOH X1052       8.296  22.241  32.489  0.00  0.00            
ATOM   3205  OW  HOH X1053       6.189  17.499  13.500  0.00  0.00            
ATOM   3206  HW1 HOH X1053       5.232  17.477  13.503  0.00  0.00            
ATOM   3207  HW2 HOH X1053       6.420  17.780  12.614  0.00  0.00            
ATOM   3208  OW  HOH X1054      15.359  27.138  10.592  0.00  0.00            
ATOM   3209  HW1 HOH X1054      15.534  26.799   9.714  0.00  0.00            
ATOM   3210  HW2 HOH X1054      14.887  27.958  10.443  0.00  0.00            
ATOM   3211  OW  HOH X1055      11.575  25.993   1.165  0.00  0.00            
ATOM   3212  HW1 HOH X1055      11.394  25.914   2.101  0.00  0.00            
ATOM   3213  HW2 HOH X1055      12.028  26.832   1.078  0.00  0.00            
ATOM   3214  OW  HOH X1056       4.734   0.796  11.044  0.00  0.00            
ATOM   3215  HW1 HOH X1056       5.078   1.575  10.607  0.00  0.00            
ATOM   3216  HW2 HOH X1056       3.976   1.110  11.536  0.00  0.00            
ATOM   3217  OW  HOH X1057      15.050   3.319  22.362  0.00  0.00            
ATOM   3218  HW1 HOH X1057      15.392   2.922  23.164  0.00  0.00            
ATOM   3219  HW2 HOH X1057      15.684   4.003  22.144  0.00  0.00            
ATOM   3220  OW  HOH X1058      21.878   8.748  27.714  0.00  0.00            
ATOM   3221  HW1 HOH X1058      21.475   9.225  26.989  0.00  0.00            
ATOM   3222  HW2 HOH X1058      21.361   7.947  27.792  0.00  0.00            
ATOM   3223  OW  HOH X1059      17.225  10.816  37.217  0.00  0.00            
ATOM   3224  HW1 HOH X1059      17.897  11.402  37.565  0.00  0.00            
ATOM   3225  HW2 HOH X1059      17.715  10.093  36.826  0.00  0.00            
ATOM   3226  OW  HOH X1060       6.370  24.211  22.546  0.00  0.00            
ATOM   3227  HW1 HOH X1060       6.799  23.356  22.503  0.00  0.00            
ATOM   3228  HW2 HOH X1060       6.204  24.442  21.632  0.00  0.00            
ATOM   3229  OW  HOH X1061       0.755   8.642  21.242  0.00  0.00            
ATOM   3230  HW1 HOH X1061       1.328   8.540  20.482  0.00  0.00            
ATOM   3231  HW2 HOH X1061       1.284   9.126  21.877  0.00  0.00            
ATOM   3232  OW  HOH X1062       0.409  27.492  25.273  0.00  0.00            
ATOM   3233  HW1 HOH X1062      -0.235  27.698  25.951  0.00  0.00            
ATOM   3234  HW2 HOH X1062       0.415  26.536  25.230  0.00  0.00            
ATOM   3235  OW  HOH X1063      27.449  27.801  12.511  0.00  0.00            
ATOM   3236  HW1 HOH X1063      28.048  28.375  12.988  0.00  0.00            
ATOM   3237  HW2 HOH X1063      26.917  27.389  13.193  0.00  0.00            
ATOM   3238  OW  HOH X1064       4.943  19.723  38.783  0.00  0.00            
ATOM   3239  HW1 HOH X1064       4.178  20.258  38.573  0.00  0.00            
ATOM   3240  HW2 HOH X1064       5.297  20.113  39.582  0.00  0.00            
ATOM   3241  OW  HOH X1065      18.042  16.975  31.804  0.00  0.00            
ATOM   3242  HW1 HOH X1065      18.957  16.708  31.717  0.00  0.00            
ATOM   3243  HW2 HOH X1065      17.693  16.412  32.495  0.00  0.00            
ATOM   3244  OW  HOH X1066       2.980   9.602   3.088  0.00  0.00            
ATOM   3245  HW1 HOH X1066       2.676  10.332   3.628  0.00  0.00            
ATOM   3246  HW2 HOH X1066       3.762   9.281   3.536  0.00  0.00            
ATOM   3247  OW  HOH X1067      20.538   6.518  28.264  0.00  0.00            
ATOM   3248  HW1 HOH X1067      19.638   6.195  28.213  0.00  0.00            
ATOM   3249  HW2 HOH X1067      21.053   5.871  27.781  0.00  0.00            
ATOM   3250  OW  HOH X1068      17.688  10.406   3.282  0.00  0.00            
ATOM   3251  HW1 HOH X1068      17.212   9.599   3.475  0.00  0.00            
ATOM   3252  HW2 HOH X1068      17.036  11.099   3.383  0.00  0.00            
ATOM   3253  OW  HOH X1069      28.840   1.019  33.253  0.00  0.00            
ATOM   3254  HW1 HOH X1069      28.759   0.441  34.011  0.00  0.00            
ATOM   3255  HW2 HOH X1069      29.782   1.076  33.094  0.00  0.00            
ATOM   3256  OW  HOH X1070       5.649  21.004  31.270  0.00  0.00            
ATOM   3257  HW1 HOH X1070       4.847  21.500  31.105  0.00  0.00            
ATOM   3258  HW2 HOH X1070       6.054  20.909  30.408  0.00  0.00            
ATOM   3259  OW  HOH X1071      17.455  28.184   6.626  0.00  0.00            
ATOM   3260  HW1 HOH X1071      17.786  29.043   6.891  0.00  0.00            
ATOM   3261  HW2 HOH X1071      17.460  28.210   5.669  0.00  0.00            
ATOM   3262  OW  HOH X1072      14.011  27.757  23.071  0.00  0.00            
ATOM   3263  HW1 HOH X1072      13.371  27.164  22.677  0.00  0.00            
ATOM   3264  HW2 HOH X1072      13.508  28.262  23.710  0.00  0.00            
ATOM   3265  OW  HOH X1073       8.793  25.634  19.518  0.00  0.00            
ATOM   3266  HW1 HOH X1073       9.145  26.238  20.172  0.00  0.00            
ATOM   3267  HW2 HOH X1073       9.284  25.832  18.720  0.00  0.00            
ATOM   3268  OW  HOH X1074       8.022  29.424   1.699  0.00  0.00            
ATOM   3269  HW1 HOH X1074       7.931  30.036   0.969  0.00  0.00            
ATOM   3270  HW2 HOH X1074       7.587  28.626   1.398  0.00  0.00            
ATOM   3271  OW  HOH X1075      22.156   2.537  12.277  0.00  0.00            
ATOM   3272  HW1 HOH X1075      22.523   2.419  11.401  0.00  0.00            
ATOM   3273  HW2 HOH X1075      22.854   2.963  12.774  0.00  0.00            
ATOM   3274  OW  HOH X1076      19.361  21.292   2.519  0.00  0.00            
ATOM   3275  HW1 HOH X1076      19.090  21.898   1.830  0.00  0.00            
ATOM   3276  HW2 HOH X1076      19.099  20.429   2.197  0.00  0.00            
ATOM   3277  OW  HOH X1077      19.249   4.894  37.839  0.00  0.00            
ATOM   3278  HW1 HOH X1077      19.785   5.683  37.920  0.00  0.00            
ATOM   3279  HW2 HOH X1077      18.830   4.801  38.695  0.00  0.00            
ATOM   3280  OW  HOH X1078      17.426   8.078   8.652  0.00  0.00            
ATOM   3281  HW1 HOH X1078      18.331   8.357   8.787  0.00  0.00            
ATOM   3282  HW2 HOH X1078      17.428   7.664   7.789  0.00  0.00            
ATOM   3283  OW  HOH X1079      26.226  14.509  10.338  0.00  0.00            
ATOM   3284  HW1 HOH X1079      26.227  13.768   9.732  0.00  0.00            
ATOM   3285  HW2 HOH X1079      26.152  15.279   9.774  0.00  0.00            
ATOM   3286  OW  HOH X1080       1.160   8.645  14.237  0.00  0.00            
ATOM   3287  HW1 HOH X1080       1.758   7.938  14.481  0.00  0.00            
ATOM   3288  HW2 HOH X1080       0.699   8.860  15.048  0.00  0.00            
ATOM   3289  OW  HOH X1081      19.002   6.575   3.021  0.00  0.00            
ATOM   3290  HW1 HOH X1081      18.367   7.236   3.298  0.00  0.00            
ATOM   3291  HW2 HOH X1081      18.471   5.807   2.812  0.00  0.00            
ATOM   3292  OW  HOH X1082       5.599   7.216   8.471  0.00  0.00            
ATOM   3293  HW1 HOH X1082       4.959   7.367   7.776  0.00  0.00            
ATOM   3294  HW2 HOH X1082       5.355   7.833   9.161  0.00  0.00            
ATOM   3295  OW  HOH X1083       4.313   1.688  21.295  0.00  0.00            
ATOM   3296  HW1 HOH X1083       4.731   2.358  21.837  0.00  0.00            
ATOM   3297  HW2 HOH X1083       3.554   2.129  20.913  0.00  0.00            
ATOM   3298  OW  HOH X1084      29.326   9.302  15.965  0.00  0.00            
ATOM   3299  HW1 HOH X1084      28.999   9.489  16.845  0.00  0.00            
ATOM   3300  HW2 HOH X1084      28.570   9.440  15.394  0.00  0.00            
ATOM   3301  OW  HOH X1085       2.192  15.004   3.351  0.00  0.00            
ATOM   3302  HW1 HOH X1085       2.349  14.740   2.444  0.00  0.00            
ATOM   3303  HW2 HOH X1085       1.362  14.587   3.581  0.00  0.00            
ATOM   3304  OW  HOH X1086      12.919  20.497   9.800  0.00  0.00            
ATOM   3305  HW1 HOH X1086      13.116  21.430   9.711  0.00  0.00            
ATOM   3306  HW2 HOH X1086      12.560  20.245   8.949  0.00  0.00            
ATOM   3307  OW  HOH X1087      29.477   6.306  22.660  0.00  0.00            
ATOM   3308  HW1 HOH X1087      28.540   6.282  22.468  0.00  0.00            
ATOM   3309  HW2 HOH X1087      29.725   7.222  22.533  0.00  0.00            
ATOM   3310  OW  HOH X1088       2.580  23.748  16.862  0.00  0.00            
ATOM   3311  HW1 HOH X1088       3.132  24.461  17.185  0.00  0.00            
ATOM   3312  HW2 HOH X1088       2.759  23.713  15.923  0.00  0.00            
ATOM   3313  OW  HOH X1089      22.789  19.004  18.434  0.00  0.00            
ATOM   3314  HW1 HOH X1089      22.444  19.789  18.009  0.00  0.00            
ATOM   3315  HW2 HOH X1089      23.739  19.087  18.357  0.00  0.00            
ATOM   3316  OW  HOH X1090       0.267  16.646  15.133  0.00  0.00            
ATOM   3317  HW1 HOH X1090      -0.532  17.147  15.293  0.00  0.00            
ATOM   3318  HW2 HOH X1090       0.938  17.093  15.650  0.00  0.00            
ATOM   3319  OW  HOH X1091      18.789  28.730  21.571  0.00  0.00            
ATOM   3320  HW1 HOH X1091      19.373  28.451  22.276  0.00  0.00            
ATOM   3321  HW2 HOH X1091      17.933  28.378  21.815  0.00  0.00            
ATOM   3322  OW  HOH X1092      23.506  12.082  29.099  0.00  0.00            
ATOM   3323  HW1 HOH X1092      22.790  11.517  29.390  0.00  0.00            
ATOM   3324  HW2 HOH X1092      23.277  12.950  29.430  0.00  0.00            
ATOM   3325  OW  HOH X1093      29.425  20.662  22.877  0.00  0.00            
ATOM   3326  HW1 HOH X1093      28.965  20.891  23.684  0.00  0.00            
ATOM   3327  HW2 HOH X1093      30.332  20.924  23.035  0.00  0.00            
ATOM   3328  OW  HOH X1094      27.442   7.471  10.202  0.00  0.00            
ATOM   3329  HW1 HOH X1094      26.626   7.725  10.633  0.00  0.00            
ATOM   3330  HW2 HOH X1094      28.089   7.449  10.908  0.00  0.00            
ATOM   3331  OW  HOH X1095       5.733  15.636  33.053  0.00  0.00            
ATOM   3332  HW1 HOH X1095       4.848  15.902  33.305  0.00  0.00            
ATOM   3333  HW2 HOH X1095       6.264  15.801  33.832  0.00  0.00            
ATOM   3334  OW  HOH X1096      24.964   4.143   0.652  0.00  0.00            
ATOM   3335  HW1 HOH X1096      25.642   3.543   0.342  0.00  0.00            
ATOM   3336  HW2 HOH X1096      24.728   4.658  -0.120  0.00  0.00            
ATOM   3337  OW  HOH X1097       0.399   7.867  26.181  0.00  0.00            
ATOM   3338  HW1 HOH X1097       0.934   8.628  25.956  0.00  0.00            
ATOM   3339  HW2 HOH X1097      -0.368   7.936  25.613  0.00  0.00            
ATOM   3340  OW  HOH X1098      24.349   3.959  13.333  0.00  0.00            
ATOM   3341  HW1 HOH X1098      24.356   3.180  13.889  0.00  0.00            
ATOM   3342  HW2 HOH X1098      24.696   4.655  13.890  0.00  0.00            
ATOM   3343  OW  HOH X1099       1.987  23.448  23.648  0.00  0.00            
ATOM   3344  HW1 HOH X1099       1.178  23.790  23.267  0.00  0.00            
ATOM   3345  HW2 HOH X1099       2.236  22.725  23.073  0.00  0.00            
ATOM   3346  OW  HOH X1100      14.248  25.613   4.089  0.00  0.00            
ATOM   3347  HW1 HOH X1100      14.454  25.820   3.178  0.00  0.00            
ATOM   3348  HW2 HOH X1100      14.941  25.012   4.361  0.00  0.00            
ATOM   3349  OW  HOH X1101       4.239  26.783  39.736  0.00  0.00            
ATOM   3350  HW1 HOH X1101       3.976  26.001  39.251  0.00  0.00            
ATOM   3351  HW2 HOH X1101       3.429  27.105  40.130  0.00  0.00            
ATOM   3352  OW  HOH X1102       2.131   5.145  13.628  0.00  0.00            
ATOM   3353  HW1 HOH X1102       2.898   5.288  14.183  0.00  0.00            
ATOM   3354  HW2 HOH X1102       1.390   5.159  14.235  0.00  0.00            
ATOM   3355  OW  HOH X1103       1.342  12.838  21.603  0.00  0.00            
ATOM   3356  HW1 HOH X1103       1.389  13.126  22.515  0.00  0.00            
ATOM   3357  HW2 HOH X1103       1.813  12.005  21.590  0.00  0.00            
ATOM   3358  OW  HOH X1104       5.396  27.408  21.660  0.00  0.00            
ATOM   3359  HW1 HOH X1104       5.531  28.218  21.168  0.00  0.00            
ATOM   3360  HW2 HOH X1104       5.467  26.714  21.004  0.00  0.00            
ATOM   3361  OW  HOH X1105      27.858   4.349  18.892  0.00  0.00            
ATOM   3362  HW1 HOH X1105      27.529   4.086  19.751  0.00  0.00            
ATOM   3363  HW2 HOH X1105      28.747   3.996  18.857  0.00  0.00            
ATOM   3364  OW  HOH X1106      10.996  29.561  19.912  0.00  0.00            
ATOM   3365  HW1 HOH X1106      11.868  29.518  20.305  0.00  0.00            
ATOM   3366  HW2 HOH X1106      10.845  30.495  19.765  0.00  0.00            
ATOM   3367  OW  HOH X1107       4.311  20.142  20.250  0.00  0.00            
ATOM   3368  HW1 HOH X1107       4.487  20.896  19.687  0.00  0.00            
ATOM   3369  HW2 HOH X1107       4.409  19.385  19.673  0.00  0.00            
ATOM   3370  OW  HOH X1108      26.723  26.893  31.907  0.00  0.00            
ATOM   3371  HW1 HOH X1108      27.280  26.628  32.639  0.00  0.00            
ATOM   3372  HW2 HOH X1108      25.887  27.122  32.311  0.00  0.00            
ATOM   3373  OW  HOH X1109       5.238  19.553  35.470  0.00  0.00            
ATOM   3374  HW1 HOH X1109       4.959  20.381  35.862  0.00  0.00            
ATOM   3375  HW2 HOH X1109       5.090  18.901  36.156  0.00  0.00            
ATOM   3376  OW  HOH X1110      12.061  22.909   9.139  0.00  0.00            
ATOM   3377  HW1 HOH X1110      12.098  23.795   8.780  0.00  0.00            
ATOM   3378  HW2 HOH X1110      11.319  22.500   8.694  0.00  0.00            
ATOM   3379  OW  HOH X1111      13.172  25.477  31.938  0.00  0.00            
ATOM   3380  HW1 HOH X1111      12.753  26.324  31.788  0.00  0.00            
ATOM   3381  HW2 HOH X1111      12.537  24.984  32.458  0.00  0.00            
ATOM   3382  OW  HOH X1112      25.488  13.921   5.276  0.00  0.00            
ATOM   3383  HW1 HOH X1112      26.115  13.916   4.553  0.00  0.00            
ATOM   3384  HW2 HOH X1112      25.192  14.830   5.330  0.00  0.00            
ATOM   3385  OW  HOH X1113      24.594  28.913  24.508  0.00  0.00            
ATOM   3386  HW1 HOH X1113      24.060  28.549  25.214  0.00  0.00            
ATOM   3387  HW2 HOH X1113      24.868  29.771  24.832  0.00  0.00            
ATOM   3388  OW  HOH X1114      21.500   1.579  21.526  0.00  0.00            
ATOM   3389  HW1 HOH X1114      21.741   2.313  20.960  0.00  0.00            
ATOM   3390  HW2 HOH X1114      20.677   1.255  21.161  0.00  0.00            
ATOM   3391  OW  HOH X1115      18.108  23.075   0.717  0.00  0.00            
ATOM   3392  HW1 HOH X1115      18.339  23.800   0.136  0.00  0.00            
ATOM   3393  HW2 HOH X1115      17.336  22.680   0.312  0.00  0.00            
ATOM   3394  OW  HOH X1116       2.738   9.842  28.668  0.00  0.00            
ATOM   3395  HW1 HOH X1116       2.648   9.035  29.175  0.00  0.00            
ATOM   3396  HW2 HOH X1116       3.629  10.141  28.851  0.00  0.00            
ATOM   3397  OW  HOH X1117      23.948   4.965   7.309  0.00  0.00            
ATOM   3398  HW1 HOH X1117      23.770   4.028   7.386  0.00  0.00            
ATOM   3399  HW2 HOH X1117      23.093   5.358   7.128  0.00  0.00            
ATOM   3400  OW  HOH X1118      20.956  23.242  34.813  0.00  0.00            
ATOM   3401  HW1 HOH X1118      20.407  22.961  35.545  0.00  0.00            
ATOM   3402  HW2 HOH X1118      21.612  23.815  35.210  0.00  0.00            
ATOM   3403  OW  HOH X1119       3.449  18.055  33.832  0.00  0.00            
ATOM   3404  HW1 HOH X1119       2.866  18.717  33.460  0.00  0.00            
ATOM   3405  HW2 HOH X1119       4.138  18.558  34.266  0.00  0.00            
ATOM   3406  OW  HOH X1120      25.317  24.995  37.262  0.00  0.00            
ATOM   3407  HW1 HOH X1120      25.391  24.758  38.186  0.00  0.00            
ATOM   3408  HW2 HOH X1120      25.419  25.947  37.250  0.00  0.00            
ATOM   3409  OW  HOH X1121      26.432  25.995  26.155  0.00  0.00            
ATOM   3410  HW1 HOH X1121      27.113  26.666  26.116  0.00  0.00            
ATOM   3411  HW2 HOH X1121      26.223  25.919  27.087  0.00  0.00            
ATOM   3412  OW  HOH X1122       2.695  15.880   8.779  0.00  0.00            
ATOM   3413  HW1 HOH X1122       2.083  16.467   9.224  0.00  0.00            
ATOM   3414  HW2 HOH X1122       2.365  15.002   8.968  0.00  0.00            
ATOM   3415  OW  HOH X1123       0.900   7.417  33.189  0.00  0.00            
ATOM   3416  HW1 HOH X1123       1.478   8.009  33.672  0.00  0.00            
ATOM   3417  HW2 HOH X1123       0.246   7.992  32.792  0.00  0.00            
ATOM   3418  OW  HOH X1124       4.737  23.312  12.490  0.00  0.00            
ATOM   3419  HW1 HOH X1124       4.862  23.123  11.560  0.00  0.00            
ATOM   3420  HW2 HOH X1124       5.481  23.867  12.723  0.00  0.00            
ATOM   3421  OW  HOH X1125      27.800  18.827  21.686  0.00  0.00            
ATOM   3422  HW1 HOH X1125      27.574  18.266  22.428  0.00  0.00            
ATOM   3423  HW2 HOH X1125      28.353  19.512  22.061  0.00  0.00            
ATOM   3424  OW  HOH X1126       0.763  26.359  13.769  0.00  0.00            
ATOM   3425  HW1 HOH X1126       1.353  27.074  13.529  0.00  0.00            
ATOM   3426  HW2 HOH X1126       1.316  25.578  13.763  0.00  0.00            
ATOM   3427  OW  HOH X1127       4.069  14.152  18.032  0.00  0.00            
ATOM   3428  HW1 HOH X1127       3.476  14.677  18.569  0.00  0.00            
ATOM   3429  HW2 HOH X1127       4.276  14.713  17.285  0.00  0.00            
ATOM   3430  OW  HOH X1128       3.609   5.260  17.269  0.00  0.00            
ATOM   3431  HW1 HOH X1128       3.093   6.059  17.372  0.00  0.00            
ATOM   3432  HW2 HOH X1128       3.570   4.837  18.127  0.00  0.00            
ATOM   3433  OW  HOH X1129      11.758   6.340  23.510  0.00  0.00            
ATOM   3434  HW1 HOH X1129      12.672   6.581  23.657  0.00  0.00            
ATOM   3435  HW2 HOH X1129      11.286   7.173  23.515  0.00  0.00            
ATOM   3436  OW  HOH X1130      26.620   5.224  32.496  0.00  0.00            
ATOM   3437  HW1 HOH X1130      26.965   5.145  31.607  0.00  0.00            
ATOM   3438  HW2 HOH X1130      27.249   4.750  33.041  0.00  0.00            
ATOM   3439  OW  HOH X1131      20.005   5.471  19.562  0.00  0.00            
ATOM   3440  HW1 HOH X1131      19.623   6.348  19.552  0.00  0.00            
ATOM   3441  HW2 HOH X1131      20.146   5.260  18.639  0.00  0.00            
ATOM   3442  OW  HOH X1132      13.526  16.348  13.570  0.00  0.00            
ATOM   3443  HW1 HOH X1132      12.612  16.264  13.840  0.00  0.00            
ATOM   3444  HW2 HOH X1132      13.616  15.744  12.833  0.00  0.00            
ATOM   3445  OW  HOH X1133      14.547  21.642  33.320  0.00  0.00            
ATOM   3446  HW1 HOH X1133      14.503  21.525  34.269  0.00  0.00            
ATOM   3447  HW2 HOH X1133      13.649  21.846  33.061  0.00  0.00            
ATOM   3448  OW  HOH X1134      10.179  27.306  13.616  0.00  0.00            
ATOM   3449  HW1 HOH X1134      10.800  27.588  12.945  0.00  0.00            
ATOM   3450  HW2 HOH X1134       9.424  27.883  13.503  0.00  0.00            
ATOM   3451  OW  HOH X1135       4.261  29.198  31.829  0.00  0.00            
ATOM   3452  HW1 HOH X1135       4.242  30.063  31.419  0.00  0.00            
ATOM   3453  HW2 HOH X1135       4.244  29.378  32.769  0.00  0.00            
ATOM   3454  OW  HOH X1136      21.154  18.824  20.909  0.00  0.00            
ATOM   3455  HW1 HOH X1136      21.788  18.806  20.192  0.00  0.00            
ATOM   3456  HW2 HOH X1136      21.609  18.413  21.644  0.00  0.00            
ATOM   3457  OW  HOH X1137       2.575  17.765  16.212  0.00  0.00            
ATOM   3458  HW1 HOH X1137       3.522  17.625  16.215  0.00  0.00            
ATOM   3459  HW2 HOH X1137       2.414  18.335  16.964  0.00  0.00            
ATOM   3460  OW  HOH X1138      21.821  23.595  38.239  0.00  0.00            
ATOM   3461  HW1 HOH X1138      21.886  22.727  37.841  0.00  0.00            
ATOM   3462  HW2 HOH X1138      21.834  23.428  39.182  0.00  0.00            
ATOM   3463  OW  HOH X1139      18.835  25.636   5.459  0.00  0.00            
ATOM   3464  HW1 HOH X1139      18.781  25.678   4.504  0.00  0.00            
ATOM   3465  HW2 HOH X1139      18.930  24.704   5.653  0.00  0.00            
ATOM   3466  OW  HOH X1140      22.136   5.406  14.955  0.00  0.00            
ATOM   3467  HW1 HOH X1140      22.490   4.760  15.566  0.00  0.00            
ATOM   3468  HW2 HOH X1140      21.343   4.998  14.607  0.00  0.00            
ATOM   3469  OW  HOH X1141      28.980   6.609  17.659  0.00  0.00            
ATOM   3470  HW1 HOH X1141      28.586   6.108  18.373  0.00  0.00            
ATOM   3471  HW2 HOH X1141      28.997   7.511  17.981  0.00  0.00            
ATOM   3472  OW  HOH X1142       0.468  17.166  39.043  0.00  0.00            
ATOM   3473  HW1 HOH X1142       0.132  16.403  39.513  0.00  0.00            
ATOM   3474  HW2 HOH X1142       1.415  17.030  39.011  0.00  0.00            
ATOM   3475  OW  HOH X1143      20.113  21.799  29.054  0.00  0.00            
ATOM   3476  HW1 HOH X1143      20.339  22.688  29.328  0.00  0.00            
ATOM   3477  HW2 HOH X1143      19.165  21.745  29.174  0.00  0.00            
ATOM   3478  OW  HOH X1144      14.230  19.326  12.030  0.00  0.00            
ATOM   3479  HW1 HOH X1144      13.723  19.760  11.344  0.00  0.00            
ATOM   3480  HW2 HOH X1144      14.472  20.029  12.631  0.00  0.00            
ATOM   3481  OW  HOH X1145       0.193   1.504  26.503  0.00  0.00            
ATOM   3482  HW1 HOH X1145       0.714   2.264  26.245  0.00  0.00            
ATOM   3483  HW2 HOH X1145       0.824   0.907  26.907  0.00  0.00            
ATOM   3484  OW  HOH X1146      23.157   3.536  16.779  0.00  0.00            
ATOM   3485  HW1 HOH X1146      24.076   3.701  16.570  0.00  0.00            
ATOM   3486  HW2 HOH X1146      23.073   3.778  17.701  0.00  0.00            
ATOM   3487  OW  HOH X1147      16.507  14.989  12.999  0.00  0.00            
ATOM   3488  HW1 HOH X1147      17.393  14.952  13.357  0.00  0.00            
ATOM   3489  HW2 HOH X1147      16.075  15.683  13.498  0.00  0.00            
ATOM   3490  OW  HOH X1148      15.142  29.490  15.012  0.00  0.00            
ATOM   3491  HW1 HOH X1148      15.686  30.088  15.525  0.00  0.00            
ATOM   3492  HW2 HOH X1148      15.717  28.751  14.815  0.00  0.00            
ATOM   3493  OW  HOH X1149       7.702  26.277  36.353  0.00  0.00            
ATOM   3494  HW1 HOH X1149       8.396  25.646  36.544  0.00  0.00            
ATOM   3495  HW2 HOH X1149       6.890  25.800  36.525  0.00  0.00            
ATOM   3496  OW  HOH X1150      17.589  13.076  21.574  0.00  0.00            
ATOM   3497  HW1 HOH X1150      18.244  13.649  21.972  0.00  0.00            
ATOM   3498  HW2 HOH X1150      17.542  13.361  20.662  0.00  0.00            
ATOM   3499  OW  HOH X1151      23.322  12.183  39.514  0.00  0.00            
ATOM   3500  HW1 HOH X1151      22.799  12.080  40.309  0.00  0.00            
ATOM   3501  HW2 HOH X1151      23.601  11.295  39.293  0.00  0.00            
ATOM   3502  OW  HOH X1152      26.891  28.521  18.432  0.00  0.00            
ATOM   3503  HW1 HOH X1152      26.040  28.641  18.010  0.00  0.00            
ATOM   3504  HW2 HOH X1152      27.432  28.099  17.765  0.00  0.00            
ATOM   3505  OW  HOH X1153      26.804  12.199   1.872  0.00  0.00            
ATOM   3506  HW1 HOH X1153      27.546  11.917   1.338  0.00  0.00            
ATOM   3507  HW2 HOH X1153      26.141  11.521   1.739  0.00  0.00            
ATOM   3508  OW  HOH X1154      20.958   5.290  10.006  0.00  0.00            
ATOM   3509  HW1 HOH X1154      20.950   5.945   9.308  0.00  0.00            
ATOM   3510  HW2 HOH X1154      21.723   5.514  10.537  0.00  0.00            
ATOM   3511  OW  HOH X1155      28.860  15.043   8.013  0.00  0.00            
ATOM   3512  HW1 HOH X1155      28.745  14.194   8.441  0.00  0.00            
ATOM   3513  HW2 HOH X1155      28.825  14.846   7.077  0.00  0.00            
ATOM   3514  OW  HOH X1156      24.100  18.782  37.117  0.00  0.00            
ATOM   3515  HW1 HOH X1156      24.124  19.555  37.680  0.00  0.00            
ATOM   3516  HW2 HOH X1156      23.290  18.333  37.360  0.00  0.00            
ATOM   3517  OW  HOH X1157       1.858  14.096   0.566  0.00  0.00            
ATOM   3518  HW1 HOH X1157       2.643  14.231   0.036  0.00  0.00            
ATOM   3519  HW2 HOH X1157       1.143  14.058  -0.070  0.00  0.00            
ATOM   3520  OW  HOH X1158       1.852   6.701  39.077  0.00  0.00            
ATOM   3521  HW1 HOH X1158       1.896   7.542  39.530  0.00  0.00            
ATOM   3522  HW2 HOH X1158       2.759   6.397  39.044  0.00  0.00            
ATOM   3523  OW  HOH X1159      22.729  17.592  30.075  0.00  0.00            
ATOM   3524  HW1 HOH X1159      21.855  17.207  30.128  0.00  0.00            
ATOM   3525  HW2 HOH X1159      22.585  18.467  29.715  0.00  0.00            
ATOM   3526  OW  HOH X1160       2.654  24.081  14.337  0.00  0.00            
ATOM   3527  HW1 HOH X1160       3.337  24.066  13.666  0.00  0.00            
ATOM   3528  HW2 HOH X1160       2.051  23.383  14.081  0.00  0.00            
ATOM   3529  OW  HOH X1161      11.815  25.977  21.897  0.00  0.00            
ATOM   3530  HW1 HOH X1161      11.451  25.165  21.544  0.00  0.00            
ATOM   3531  HW2 HOH X1161      11.157  26.642  21.696  0.00  0.00            
ATOM   3532  OW  HOH X1162       7.128   9.974  23.164  0.00  0.00            
ATOM   3533  HW1 HOH X1162       7.017   9.581  24.030  0.00  0.00            
ATOM   3534  HW2 HOH X1162       8.002  10.364  23.187  0.00  0.00            
ATOM   3535  OW  HOH X1163      24.590   6.167  38.537  0.00  0.00            
ATOM   3536  HW1 HOH X1163      25.500   6.073  38.820  0.00  0.00            
ATOM   3537  HW2 HOH X1163      24.396   7.097  38.658  0.00  0.00            
ATOM   3538  OW  HOH X1164       1.404  10.991  12.908  0.00  0.00            
ATOM   3539  HW1 HOH X1164       1.549  10.227  13.467  0.00  0.00            
ATOM   3540  HW2 HOH X1164       0.456  11.123  12.923  0.00  0.00            
ATOM   3541  OW  HOH X1165      28.257  21.194  11.454  0.00  0.00            
ATOM   3542  HW1 HOH X1165      28.187  20.265  11.232  0.00  0.00            
ATOM   3543  HW2 HOH X1165      27.910  21.254  12.344  0.00  0.00            
ATOM   3544  OW  HOH X1166      27.905   8.066  35.391  0.00  0.00            
ATOM   3545  HW1 HOH X1166      28.238   8.391  34.554  0.00  0.00            
ATOM   3546  HW2 HOH X1166      26.953   8.097  35.299  0.00  0.00            
ATOM   3547  OW  HOH X1167       1.560  11.607  17.359  0.00  0.00            
ATOM   3548  HW1 HOH X1167       2.003  11.181  16.625  0.00  0.00            
ATOM   3549  HW2 HOH X1167       1.307  12.466  17.022  0.00  0.00            
ATOM   3550  OW  HOH X1168      27.104  11.024  35.873  0.00  0.00            
ATOM   3551  HW1 HOH X1168      27.572  11.818  36.131  0.00  0.00            
ATOM   3552  HW2 HOH X1168      26.746  11.227  35.009  0.00  0.00            
ATOM   3553  OW  HOH X1169      25.573  25.494  29.156  0.00  0.00            
ATOM   3554  HW1 HOH X1169      24.690  25.661  29.487  0.00  0.00            
ATOM   3555  HW2 HOH X1169      26.150  25.739  29.879  0.00  0.00            
ATOM   3556  OW  HOH X1170       4.385  17.849   4.994  0.00  0.00            
ATOM   3557  HW1 HOH X1170       4.424  18.485   5.708  0.00  0.00            
ATOM   3558  HW2 HOH X1170       4.034  17.055   5.399  0.00  0.00            
ATOM   3559  OW  HOH X1171      29.530   8.065  12.149  0.00  0.00            
ATOM   3560  HW1 HOH X1171      30.267   8.327  12.700  0.00  0.00            
ATOM   3561  HW2 HOH X1171      28.929   7.620  12.747  0.00  0.00            
ATOM   3562  OW  HOH X1172      21.868  29.466  29.669  0.00  0.00            
ATOM   3563  HW1 HOH X1172      21.961  30.346  29.306  0.00  0.00            
ATOM   3564  HW2 HOH X1172      21.467  29.601  30.527  0.00  0.00            
ATOM   3565  OW  HOH X1173      29.263   9.762   9.949  0.00  0.00            
ATOM   3566  HW1 HOH X1173      29.431   8.912  10.356  0.00  0.00            
ATOM   3567  HW2 HOH X1173      28.822   9.551   9.126  0.00  0.00            
ATOM   3568  OW  HOH X1174       6.985   8.064  34.321  0.00  0.00            
ATOM   3569  HW1 HOH X1174       6.526   7.283  34.632  0.00  0.00            
ATOM   3570  HW2 HOH X1174       6.744   8.131  33.397  0.00  0.00            
ATOM   3571  OW  HOH X1175      22.985  14.592  13.231  0.00  0.00            
ATOM   3572  HW1 HOH X1175      22.704  14.946  12.387  0.00  0.00            
ATOM   3573  HW2 HOH X1175      23.907  14.369  13.102  0.00  0.00            
ATOM   3574  OW  HOH X1176      16.789  20.603  20.382  0.00  0.00            
ATOM   3575  HW1 HOH X1176      17.430  20.634  19.672  0.00  0.00            
ATOM   3576  HW2 HOH X1176      17.080  21.276  20.998  0.00  0.00            
ATOM   3577  OW  HOH X1177      15.581  12.221  29.136  0.00  0.00            
ATOM   3578  HW1 HOH X1177      14.980  12.691  28.558  0.00  0.00            
ATOM   3579  HW2 HOH X1177      16.104  11.677  28.547  0.00  0.00            
ATOM   3580  OW  HOH X1178      20.673   6.793  32.056  0.00  0.00            
ATOM   3581  HW1 HOH X1178      20.262   7.370  31.412  0.00  0.00            
ATOM   3582  HW2 HOH X1178      21.482   6.503  31.635  0.00  0.00            
ATOM   3583  OW  HOH X1179      12.095  20.467  38.849  0.00  0.00            
ATOM   3584  HW1 HOH X1179      11.637  19.661  38.612  0.00  0.00            
ATOM   3585  HW2 HOH X1179      12.836  20.176  39.380  0.00  0.00            
ATOM   3586  OW  HOH X1180      12.987  30.322  31.751  0.00  0.00            
ATOM   3587  HW1 HOH X1180      12.288  29.682  31.620  0.00  0.00            
ATOM   3588  HW2 HOH X1180      13.747  29.799  32.007  0.00  0.00            
ATOM   3589  OW  HOH X1181      14.207  29.585  10.452  0.00  0.00            
ATOM   3590  HW1 HOH X1181      14.221  30.122  11.245  0.00  0.00            
ATOM   3591  HW2 HOH X1181      14.654  30.117   9.794  0.00  0.00            
ATOM   3592  OW  HOH X1182      22.909  18.038  26.988  0.00  0.00            
ATOM   3593  HW1 HOH X1182      23.625  18.445  27.477  0.00  0.00            
ATOM   3594  HW2 HOH X1182      23.330  17.348  26.476  0.00  0.00            
ATOM   3595  OW  HOH X1183      16.240  11.219  24.865  0.00  0.00            
ATOM   3596  HW1 HOH X1183      15.434  10.817  24.543  0.00  0.00            
ATOM   3597  HW2 HOH X1183      16.242  12.095  24.478  0.00  0.00            
ATOM   3598  OW  HOH X1184      16.020  13.855  23.993  0.00  0.00            
ATOM   3599  HW1 HOH X1184      16.764  13.720  23.406  0.00  0.00            
ATOM   3600  HW2 HOH X1184      16.285  14.586  24.551  0.00  0.00            
ATOM   3601  OW  HOH X1185       5.419  27.150   2.521  0.00  0.00            
ATOM   3602  HW1 HOH X1185       5.066  27.141   1.631  0.00  0.00            
ATOM   3603  HW2 HOH X1185       6.263  26.704   2.449  0.00  0.00            
ATOM   3604  OW  HOH X1186      16.220  10.990  31.561  0.00  0.00            
ATOM   3605  HW1 HOH X1186      16.909  11.492  31.997  0.00  0.00            
ATOM   3606  HW2 HOH X1186      16.178  11.357  30.678  0.00  0.00            
ATOM   3607  OW  HOH X1187      23.470   1.783  27.113  0.00  0.00            
ATOM   3608  HW1 HOH X1187      23.426   1.557  28.042  0.00  0.00            
ATOM   3609  HW2 HOH X1187      22.657   1.439  26.744  0.00  0.00            
ATOM   3610  OW  HOH X1188      25.246  12.819  36.940  0.00  0.00            
ATOM   3611  HW1 HOH X1188      24.614  12.169  36.635  0.00  0.00            
ATOM   3612  HW2 HOH X1188      25.481  13.313  36.154  0.00  0.00            
ATOM   3613  OW  HOH X1189      15.584   6.236   9.405  0.00  0.00            
ATOM   3614  HW1 HOH X1189      16.282   6.890   9.445  0.00  0.00            
ATOM   3615  HW2 HOH X1189      15.875   5.539   9.993  0.00  0.00            
ATOM   3616  OW  HOH X1190      13.272   4.498  20.447  0.00  0.00            
ATOM   3617  HW1 HOH X1190      12.376   4.165  20.402  0.00  0.00            
ATOM   3618  HW2 HOH X1190      13.687   3.977  21.134  0.00  0.00            
ATOM   3619  OW  HOH X1191      23.609  13.092  18.930  0.00  0.00            
ATOM   3620  HW1 HOH X1191      23.804  13.803  18.319  0.00  0.00            
ATOM   3621  HW2 HOH X1191      23.878  13.430  19.784  0.00  0.00            
ATOM   3622  OW  HOH X1192       8.152   4.478  32.048  0.00  0.00            
ATOM   3623  HW1 HOH X1192       8.303   4.526  32.992  0.00  0.00            
ATOM   3624  HW2 HOH X1192       7.879   5.362  31.803  0.00  0.00            
ATOM   3625  OW  HOH X1193      23.197  24.811  35.434  0.00  0.00            
ATOM   3626  HW1 HOH X1193      23.424  25.448  34.756  0.00  0.00            
ATOM   3627  HW2 HOH X1193      23.930  24.843  36.048  0.00  0.00            
ATOM   3628  OW  HOH X1194      22.868   0.893  16.715  0.00  0.00            
ATOM   3629  HW1 HOH X1194      21.973   0.731  16.416  0.00  0.00            
ATOM   3630  HW2 HOH X1194      23.003   1.830  16.572  0.00  0.00            
ATOM   3631  OW  HOH X1195      17.963   5.254   0.325  0.00  0.00            
ATOM   3632  HW1 HOH X1195      17.702   6.147   0.099  0.00  0.00            
ATOM   3633  HW2 HOH X1195      17.263   4.936   0.895  0.00  0.00            
END
