# Supplementary material for: Evolution of cation binding in the active sites of P-loop nucleoside triphosphatases in relation to the basic catalytic mechanism
Source: eLife journal article supplement (doi:10.7554/elife.37373), 2018-12-11
Supplement: supp [file elife-37373-supp-v1.zip › elife_poa_e37373_Figure_2_source_data_3.txt]

CRYST1   30.024   30.071   39.506  90.00  90.00  90.00 P 1           1
ATOM      1  C4' ATP X   1      26.990   9.843  18.825  0.00  0.00            
ATOM      2  H4' ATP X   1      26.831  10.775  18.264  0.00  0.00            
ATOM      3  O4' ATP X   1      28.172   9.982  19.676  0.00  0.00            
ATOM      4  C1' ATP X   1      29.361   9.657  18.857  0.00  0.00            
ATOM      5  H1' ATP X   1      29.931  10.566  18.614  0.00  0.00            
ATOM      6  C5  ATP X   1      31.694   7.194  20.216  0.00  0.00            
ATOM      7  N7  ATP X   1      30.638   7.066  21.090  0.00  0.00            
ATOM      8  C8  ATP X   1      29.761   7.947  20.676  0.00  0.00            
ATOM      9  H8  ATP X   1      28.762   8.008  21.109  0.00  0.00            
ATOM     10  N9  ATP X   1      30.142   8.678  19.608  0.00  0.00            
ATOM     11  N1  ATP X   1      33.925   6.989  19.201  0.00  0.00            
ATOM     12  C2  ATP X   1      33.501   8.002  18.344  0.00  0.00            
ATOM     13  H2  ATP X   1      34.230   8.309  17.594  0.00  0.00            
ATOM     14  N3  ATP X   1      32.276   8.602  18.310  0.00  0.00            
ATOM     15  C4  ATP X   1      31.415   8.221  19.297  0.00  0.00            
ATOM     16  C6  ATP X   1      33.027   6.586  20.175  0.00  0.00            
ATOM     17  N6  ATP X   1      33.462   5.612  21.010  0.00  0.00            
ATOM     18  H61 ATP X   1      33.033   5.659  21.912  0.00  0.00            
ATOM     19  H62 ATP X   1      34.349   5.196  20.806  0.00  0.00            
ATOM     20  C2' ATP X   1      28.781   9.168  17.440  0.00  0.00            
ATOM     21  H2' ATP X   1      29.338   8.258  17.172  0.00  0.00            
ATOM     22  O2' ATP X   1      28.892  10.218  16.436  0.00  0.00            
ATOM     23  H2T ATP X   1      28.657  10.046  15.521  0.00  0.00            
ATOM     24  C3' ATP X   1      27.359   8.792  17.808  0.00  0.00            
ATOM     25  H3' ATP X   1      27.454   7.814  18.303  0.00  0.00            
ATOM     26  O3' ATP X   1      26.439   8.686  16.666  0.00  0.00            
ATOM     27  H3T ATP X   1      26.336   9.614  16.443  0.00  0.00            
ATOM     28  C5' ATP X   1      25.739   9.682  19.748  0.00  0.00            
ATOM     29  H51 ATP X   1      24.949   9.229  19.112  0.00  0.00            
ATOM     30  H52 ATP X   1      25.372  10.699  20.003  0.00  0.00            
ATOM     31  O5' ATP X   1      25.941   8.826  20.882  0.00  0.00            
ATOM     32  PA  ATP X   1      26.158   9.238  22.364  0.00  0.00            
ATOM     33  O1A ATP X   1      25.405  10.522  22.616  0.00  0.00            
ATOM     34  O2A ATP X   1      25.823   8.028  23.199  0.00  0.00            
ATOM     35  O3A ATP X   1      27.659   9.534  22.499  0.00  0.00            
ATOM     36  PB  ATP X   1      28.396  10.094  23.872  0.00  0.00            
ATOM     37  O1B ATP X   1      27.459   9.979  25.041  0.00  0.00            
ATOM     38  O2B ATP X   1      29.726   9.468  23.934  0.00  0.00            
ATOM     39  O3B ATP X   1      28.486  11.621  23.432  0.00  0.00            
ATOM     40  PG  ATP X   1      28.824  12.784  24.432  0.00  0.00            
ATOM     41  O1G ATP X   1      30.285  12.660  24.757  0.00  0.00            
ATOM     42  O2G ATP X   1      27.927  12.549  25.639  0.00  0.00            
ATOM     43  O3G ATP X   1      28.442  13.927  23.641  0.00  0.00            
ATOM     44  Mg  MG  X   2      26.813  11.219  26.588  0.00  0.00            
ATOM     45  NZ  AMM X1196      31.937  10.846  23.708  0.00  0.00            
ATOM     46  HZ1 AMM X1196      31.174  10.140  23.739  0.00  0.00            
ATOM     47  HZ2 AMM X1196      32.242  10.877  22.714  0.00  0.00            
ATOM     48  HZ3 AMM X1196      32.811  10.594  24.212  0.00  0.00            
ATOM     49  HZ4 AMM X1196      31.569  11.749  24.068  0.00  0.00            
ATOM     50  NZ  AMM X1197      11.922  -1.145  18.921  0.00  0.00            
ATOM     51  HZ1 AMM X1197      12.704  -0.973  19.584  0.00  0.00            
ATOM     52  HZ2 AMM X1197      12.386  -1.503  18.062  0.00  0.00            
ATOM     53  HZ3 AMM X1197      11.271  -0.334  18.897  0.00  0.00            
ATOM     54  HZ4 AMM X1197      11.347  -1.933  19.283  0.00  0.00            
ATOM     55  NZ  AMM X1198      15.328 -10.640  12.293  0.00  0.00            
ATOM     56  HZ1 AMM X1198      14.856  -9.898  12.847  0.00  0.00            
ATOM     57  HZ2 AMM X1198      16.341 -10.430  12.187  0.00  0.00            
ATOM     58  HZ3 AMM X1198      14.889 -10.498  11.361  0.00  0.00            
ATOM     59  HZ4 AMM X1198      15.108 -11.528  12.789  0.00  0.00            
ATOM     60  NZ  AMM X1199      24.111   0.266  19.360  0.00  0.00            
ATOM     61  HZ1 AMM X1199      24.838  -0.206  19.936  0.00  0.00            
ATOM     62  HZ2 AMM X1199      24.307  -0.006  18.376  0.00  0.00            
ATOM     63  HZ3 AMM X1199      23.974   1.276  19.567  0.00  0.00            
ATOM     64  HZ4 AMM X1199      23.231  -0.167  19.706  0.00  0.00            
ATOM     65  NZ  AMM X1200      13.569  -0.949  29.167  0.00  0.00            
ATOM     66  HZ1 AMM X1200      14.462  -0.802  29.679  0.00  0.00            
ATOM     67  HZ2 AMM X1200      13.302  -0.087  28.650  0.00  0.00            
ATOM     68  HZ3 AMM X1200      12.778  -1.250  29.771  0.00  0.00            
ATOM     69  HZ4 AMM X1200      13.737  -1.709  28.477  0.00  0.00            
ATOM     70  NZ  AMM X1201      26.387  12.873  22.120  0.00  0.00            
ATOM     71  HZ1 AMM X1201      26.238  11.902  22.460  0.00  0.00            
ATOM     72  HZ2 AMM X1201      27.250  13.224  22.582  0.00  0.00            
ATOM     73  HZ3 AMM X1201      25.634  13.528  22.413  0.00  0.00            
ATOM     74  HZ4 AMM X1201      26.314  12.967  21.087  0.00  0.00            
ATOM     75  CL  CL  X1202      47.490  -0.838  21.568  0.00  0.00            
ATOM     76  CL  CL  X1203      19.727  -3.262  25.184  0.00  0.00            
ATOM     77  CL  CL  X1204      31.268   1.169  34.630  0.00  0.00            
ATOM     78  CL  CL  X1205      38.791  14.112  29.696  0.00  0.00            
ATOM     79  OW  HOH X   3      34.201   5.245  14.986  0.00  0.00            
ATOM     80  HW1 HOH X   3      34.223   5.834  15.740  0.00  0.00            
ATOM     81  HW2 HOH X   3      35.120   5.041  14.813  0.00  0.00            
ATOM     82  OW  HOH X   4      25.076  -3.477  11.977  0.00  0.00            
ATOM     83  HW1 HOH X   4      24.539  -3.493  12.769  0.00  0.00            
ATOM     84  HW2 HOH X   4      24.502  -3.817  11.290  0.00  0.00            
ATOM     85  OW  HOH X   5      24.831  25.776  15.235  0.00  0.00            
ATOM     86  HW1 HOH X   5      24.711  25.979  16.163  0.00  0.00            
ATOM     87  HW2 HOH X   5      24.012  26.047  14.822  0.00  0.00            
ATOM     88  OW  HOH X   6      33.091  19.201  37.055  0.00  0.00            
ATOM     89  HW1 HOH X   6      32.964  19.102  37.998  0.00  0.00            
ATOM     90  HW2 HOH X   6      32.500  18.558  36.664  0.00  0.00            
ATOM     91  OW  HOH X   7      30.653   0.628  23.314  0.00  0.00            
ATOM     92  HW1 HOH X   7      31.472   0.400  22.874  0.00  0.00            
ATOM     93  HW2 HOH X   7      30.049   0.839  22.602  0.00  0.00            
ATOM     94  OW  HOH X   8      26.706  21.132  26.330  0.00  0.00            
ATOM     95  HW1 HOH X   8      27.475  20.629  26.061  0.00  0.00            
ATOM     96  HW2 HOH X   8      26.819  21.255  27.273  0.00  0.00            
ATOM     97  OW  HOH X   9      14.796   5.318  29.730  0.00  0.00            
ATOM     98  HW1 HOH X   9      14.159   4.653  29.992  0.00  0.00            
ATOM     99  HW2 HOH X   9      14.324   5.869  29.105  0.00  0.00            
ATOM    100  OW  HOH X  10      40.077  21.190  23.063  0.00  0.00            
ATOM    101  HW1 HOH X  10      40.846  20.919  22.562  0.00  0.00            
ATOM    102  HW2 HOH X  10      40.407  21.331  23.951  0.00  0.00            
ATOM    103  OW  HOH X  11      38.972   7.572  14.768  0.00  0.00            
ATOM    104  HW1 HOH X  11      39.023   7.760  15.705  0.00  0.00            
ATOM    105  HW2 HOH X  11      39.539   6.811  14.645  0.00  0.00            
ATOM    106  OW  HOH X  12      21.063  10.564  27.966  0.00  0.00            
ATOM    107  HW1 HOH X  12      21.270   9.631  27.917  0.00  0.00            
ATOM    108  HW2 HOH X  12      20.664  10.766  27.119  0.00  0.00            
ATOM    109  OW  HOH X  13      28.863  15.450  26.315  0.00  0.00            
ATOM    110  HW1 HOH X  13      28.483  14.890  25.637  0.00  0.00            
ATOM    111  HW2 HOH X  13      29.547  14.913  26.714  0.00  0.00            
ATOM    112  OW  HOH X  14      29.063  -5.392  25.416  0.00  0.00            
ATOM    113  HW1 HOH X  14      28.128  -5.539  25.273  0.00  0.00            
ATOM    114  HW2 HOH X  14      29.100  -4.646  26.014  0.00  0.00            
ATOM    115  OW  HOH X  15      28.535  17.508  28.247  0.00  0.00            
ATOM    116  HW1 HOH X  15      29.433  17.519  28.579  0.00  0.00            
ATOM    117  HW2 HOH X  15      28.507  16.758  27.653  0.00  0.00            
ATOM    118  OW  HOH X  16      13.655  17.812  22.980  0.00  0.00            
ATOM    119  HW1 HOH X  16      13.002  17.252  23.400  0.00  0.00            
ATOM    120  HW2 HOH X  16      14.118  18.228  23.707  0.00  0.00            
ATOM    121  OW  HOH X  17      21.912   1.248  32.615  0.00  0.00            
ATOM    122  HW1 HOH X  17      21.730   0.965  33.512  0.00  0.00            
ATOM    123  HW2 HOH X  17      22.543   0.607  32.285  0.00  0.00            
ATOM    124  OW  HOH X  18      24.837  18.976   9.011  0.00  0.00            
ATOM    125  HW1 HOH X  18      23.943  18.811   8.710  0.00  0.00            
ATOM    126  HW2 HOH X  18      25.187  18.107   9.210  0.00  0.00            
ATOM    127  OW  HOH X  19      34.789  14.358  34.136  0.00  0.00            
ATOM    128  HW1 HOH X  19      34.821  13.834  34.936  0.00  0.00            
ATOM    129  HW2 HOH X  19      34.571  13.730  33.446  0.00  0.00            
ATOM    130  OW  HOH X  20      24.613  23.733  18.876  0.00  0.00            
ATOM    131  HW1 HOH X  20      24.791  23.646  19.813  0.00  0.00            
ATOM    132  HW2 HOH X  20      25.272  24.353  18.563  0.00  0.00            
ATOM    133  OW  HOH X  21      18.196   7.870  23.832  0.00  0.00            
ATOM    134  HW1 HOH X  21      19.124   8.052  23.979  0.00  0.00            
ATOM    135  HW2 HOH X  21      17.843   7.704  24.707  0.00  0.00            
ATOM    136  OW  HOH X  22      11.131   2.505  21.774  0.00  0.00            
ATOM    137  HW1 HOH X  22      11.355   3.291  21.275  0.00  0.00            
ATOM    138  HW2 HOH X  22      10.199   2.601  21.967  0.00  0.00            
ATOM    139  OW  HOH X  23      30.842  27.164  22.715  0.00  0.00            
ATOM    140  HW1 HOH X  23      31.072  26.513  22.052  0.00  0.00            
ATOM    141  HW2 HOH X  23      30.086  27.623  22.347  0.00  0.00            
ATOM    142  OW  HOH X  24      37.800  -0.652  30.501  0.00  0.00            
ATOM    143  HW1 HOH X  24      37.667  -0.188  29.675  0.00  0.00            
ATOM    144  HW2 HOH X  24      37.391  -0.091  31.160  0.00  0.00            
ATOM    145  OW  HOH X  25      40.019   8.023  27.302  0.00  0.00            
ATOM    146  HW1 HOH X  25      39.850   8.895  27.658  0.00  0.00            
ATOM    147  HW2 HOH X  25      39.793   7.425  28.014  0.00  0.00            
ATOM    148  OW  HOH X  26      34.844  20.235  29.695  0.00  0.00            
ATOM    149  HW1 HOH X  26      35.168  19.448  29.257  0.00  0.00            
ATOM    150  HW2 HOH X  26      34.881  20.916  29.023  0.00  0.00            
ATOM    151  OW  HOH X  27      40.690  23.850  27.408  0.00  0.00            
ATOM    152  HW1 HOH X  27      40.885  24.254  28.253  0.00  0.00            
ATOM    153  HW2 HOH X  27      40.606  24.587  26.803  0.00  0.00            
ATOM    154  OW  HOH X  28      43.366  23.834  23.306  0.00  0.00            
ATOM    155  HW1 HOH X  28      42.922  23.523  22.517  0.00  0.00            
ATOM    156  HW2 HOH X  28      42.792  24.519  23.651  0.00  0.00            
ATOM    157  OW  HOH X  29      44.141  -3.336  25.534  0.00  0.00            
ATOM    158  HW1 HOH X  29      44.576  -2.605  25.095  0.00  0.00            
ATOM    159  HW2 HOH X  29      43.526  -2.921  26.139  0.00  0.00            
ATOM    160  OW  HOH X  30      28.196  18.674  11.587  0.00  0.00            
ATOM    161  HW1 HOH X  30      28.554  18.551  12.466  0.00  0.00            
ATOM    162  HW2 HOH X  30      28.221  19.620  11.448  0.00  0.00            
ATOM    163  OW  HOH X  31      28.236  16.488  20.244  0.00  0.00            
ATOM    164  HW1 HOH X  31      28.670  15.772  20.708  0.00  0.00            
ATOM    165  HW2 HOH X  31      28.028  17.126  20.926  0.00  0.00            
ATOM    166  OW  HOH X  32      37.031   1.363  32.799  0.00  0.00            
ATOM    167  HW1 HOH X  32      36.666   0.776  33.461  0.00  0.00            
ATOM    168  HW2 HOH X  32      36.344   2.012  32.647  0.00  0.00            
ATOM    169  OW  HOH X  33      30.127  -7.758  18.335  0.00  0.00            
ATOM    170  HW1 HOH X  33      30.178  -8.353  19.082  0.00  0.00            
ATOM    171  HW2 HOH X  33      31.028  -7.466  18.198  0.00  0.00            
ATOM    172  OW  HOH X  34      26.117  28.864  19.465  0.00  0.00            
ATOM    173  HW1 HOH X  34      25.648  28.116  19.835  0.00  0.00            
ATOM    174  HW2 HOH X  34      25.811  28.914  18.559  0.00  0.00            
ATOM    175  OW  HOH X  35      35.946  -5.979  27.894  0.00  0.00            
ATOM    176  HW1 HOH X  35      36.045  -5.512  28.724  0.00  0.00            
ATOM    177  HW2 HOH X  35      36.535  -5.525  27.292  0.00  0.00            
ATOM    178  OW  HOH X  36      26.335  -0.985  26.949  0.00  0.00            
ATOM    179  HW1 HOH X  36      25.618  -1.358  27.462  0.00  0.00            
ATOM    180  HW2 HOH X  36      25.917  -0.663  26.150  0.00  0.00            
ATOM    181  OW  HOH X  37      34.875  16.810  35.379  0.00  0.00            
ATOM    182  HW1 HOH X  37      34.672  17.480  34.726  0.00  0.00            
ATOM    183  HW2 HOH X  37      34.741  15.980  34.921  0.00  0.00            
ATOM    184  OW  HOH X  38      10.881   6.756  26.184  0.00  0.00            
ATOM    185  HW1 HOH X  38      10.953   6.791  25.230  0.00  0.00            
ATOM    186  HW2 HOH X  38      10.090   6.241  26.346  0.00  0.00            
ATOM    187  OW  HOH X  39      23.844   6.593  21.835  0.00  0.00            
ATOM    188  HW1 HOH X  39      23.211   7.307  21.766  0.00  0.00            
ATOM    189  HW2 HOH X  39      24.570   6.963  22.337  0.00  0.00            
ATOM    190  OW  HOH X  40      28.002  24.005  19.923  0.00  0.00            
ATOM    191  HW1 HOH X  40      27.703  24.262  19.051  0.00  0.00            
ATOM    192  HW2 HOH X  40      27.895  23.054  19.943  0.00  0.00            
ATOM    193  OW  HOH X  41      19.633  -4.249   8.720  0.00  0.00            
ATOM    194  HW1 HOH X  41      18.733  -4.505   8.921  0.00  0.00            
ATOM    195  HW2 HOH X  41      19.644  -4.137   7.769  0.00  0.00            
ATOM    196  OW  HOH X  42      37.987   0.268  15.975  0.00  0.00            
ATOM    197  HW1 HOH X  42      38.285   0.623  16.813  0.00  0.00            
ATOM    198  HW2 HOH X  42      37.455   0.966  15.594  0.00  0.00            
ATOM    199  OW  HOH X  43      20.926  15.888  -0.258  0.00  0.00            
ATOM    200  HW1 HOH X  43      20.281  16.333   0.292  0.00  0.00            
ATOM    201  HW2 HOH X  43      21.764  16.279  -0.009  0.00  0.00            
ATOM    202  OW  HOH X  44      20.386  14.924   5.396  0.00  0.00            
ATOM    203  HW1 HOH X  44      20.166  14.033   5.124  0.00  0.00            
ATOM    204  HW2 HOH X  44      20.471  14.870   6.347  0.00  0.00            
ATOM    205  OW  HOH X  45      22.518  12.458  35.279  0.00  0.00            
ATOM    206  HW1 HOH X  45      21.894  11.850  34.884  0.00  0.00            
ATOM    207  HW2 HOH X  45      22.082  13.309  35.241  0.00  0.00            
ATOM    208  OW  HOH X  46      11.801  -8.114  12.577  0.00  0.00            
ATOM    209  HW1 HOH X  46      11.453  -8.961  12.297  0.00  0.00            
ATOM    210  HW2 HOH X  46      11.151  -7.477  12.278  0.00  0.00            
ATOM    211  OW  HOH X  47      18.210  12.045   2.491  0.00  0.00            
ATOM    212  HW1 HOH X  47      18.122  11.137   2.203  0.00  0.00            
ATOM    213  HW2 HOH X  47      18.471  12.522   1.703  0.00  0.00            
ATOM    214  OW  HOH X  48      31.521  -6.624  26.071  0.00  0.00            
ATOM    215  HW1 HOH X  48      32.067  -7.100  25.444  0.00  0.00            
ATOM    216  HW2 HOH X  48      30.918  -6.116  25.527  0.00  0.00            
ATOM    217  OW  HOH X  49      29.175  -0.445  12.608  0.00  0.00            
ATOM    218  HW1 HOH X  49      29.033  -1.032  13.350  0.00  0.00            
ATOM    219  HW2 HOH X  49      29.203   0.430  12.996  0.00  0.00            
ATOM    220  OW  HOH X  50      14.383  21.688  10.692  0.00  0.00            
ATOM    221  HW1 HOH X  50      13.902  21.626  11.518  0.00  0.00            
ATOM    222  HW2 HOH X  50      13.955  21.053  10.118  0.00  0.00            
ATOM    223  OW  HOH X  51      47.944  11.013  23.084  0.00  0.00            
ATOM    224  HW1 HOH X  51      48.810  10.808  23.437  0.00  0.00            
ATOM    225  HW2 HOH X  51      47.334  10.728  23.765  0.00  0.00            
ATOM    226  OW  HOH X  52      41.715   1.382  18.271  0.00  0.00            
ATOM    227  HW1 HOH X  52      41.648   2.133  17.682  0.00  0.00            
ATOM    228  HW2 HOH X  52      42.456   1.589  18.841  0.00  0.00            
ATOM    229  OW  HOH X  53      21.430   4.271  32.474  0.00  0.00            
ATOM    230  HW1 HOH X  53      21.827   3.450  32.765  0.00  0.00            
ATOM    231  HW2 HOH X  53      20.646   4.363  33.015  0.00  0.00            
ATOM    232  OW  HOH X  54      33.685  -5.358  19.356  0.00  0.00            
ATOM    233  HW1 HOH X  54      34.360  -4.990  19.927  0.00  0.00            
ATOM    234  HW2 HOH X  54      34.016  -5.212  18.470  0.00  0.00            
ATOM    235  OW  HOH X  55      18.599  -1.669  15.695  0.00  0.00            
ATOM    236  HW1 HOH X  55      18.834  -1.927  16.587  0.00  0.00            
ATOM    237  HW2 HOH X  55      19.423  -1.706  15.210  0.00  0.00            
ATOM    238  OW  HOH X  56      36.165  19.719  15.503  0.00  0.00            
ATOM    239  HW1 HOH X  56      35.544  19.587  14.787  0.00  0.00            
ATOM    240  HW2 HOH X  56      36.332  18.839  15.841  0.00  0.00            
ATOM    241  OW  HOH X  57      25.122  10.961  39.397  0.00  0.00            
ATOM    242  HW1 HOH X  57      25.990  10.572  39.503  0.00  0.00            
ATOM    243  HW2 HOH X  57      25.012  11.048  38.450  0.00  0.00            
ATOM    244  OW  HOH X  58      14.064   8.788  25.520  0.00  0.00            
ATOM    245  HW1 HOH X  58      13.871   9.689  25.261  0.00  0.00            
ATOM    246  HW2 HOH X  58      14.952   8.826  25.877  0.00  0.00            
ATOM    247  OW  HOH X  59      26.933  18.836   5.863  0.00  0.00            
ATOM    248  HW1 HOH X  59      27.027  18.335   6.674  0.00  0.00            
ATOM    249  HW2 HOH X  59      26.828  19.742   6.152  0.00  0.00            
ATOM    250  OW  HOH X  60      34.252   7.328  30.659  0.00  0.00            
ATOM    251  HW1 HOH X  60      33.569   7.225  31.321  0.00  0.00            
ATOM    252  HW2 HOH X  60      35.071   7.292  31.151  0.00  0.00            
ATOM    253  OW  HOH X  61      37.951   7.213  12.009  0.00  0.00            
ATOM    254  HW1 HOH X  61      37.342   7.814  11.581  0.00  0.00            
ATOM    255  HW2 HOH X  61      38.009   7.531  12.910  0.00  0.00            
ATOM    256  OW  HOH X  62      19.364  -3.300   6.211  0.00  0.00            
ATOM    257  HW1 HOH X  62      19.359  -4.012   5.572  0.00  0.00            
ATOM    258  HW2 HOH X  62      18.761  -2.649   5.851  0.00  0.00            
ATOM    259  OW  HOH X  63      24.842  19.857  11.520  0.00  0.00            
ATOM    260  HW1 HOH X  63      25.463  19.250  11.922  0.00  0.00            
ATOM    261  HW2 HOH X  63      24.677  19.492  10.651  0.00  0.00            
ATOM    262  OW  HOH X  64      33.441  -1.249  12.337  0.00  0.00            
ATOM    263  HW1 HOH X  64      34.277  -1.097  12.778  0.00  0.00            
ATOM    264  HW2 HOH X  64      32.816  -1.388  13.049  0.00  0.00            
ATOM    265  OW  HOH X  65      28.203  12.820  17.336  0.00  0.00            
ATOM    266  HW1 HOH X  65      28.560  12.079  16.847  0.00  0.00            
ATOM    267  HW2 HOH X  65      28.700  13.576  17.024  0.00  0.00            
ATOM    268  OW  HOH X  66      44.905   2.168  16.979  0.00  0.00            
ATOM    269  HW1 HOH X  66      45.699   1.733  16.671  0.00  0.00            
ATOM    270  HW2 HOH X  66      44.190   1.690  16.559  0.00  0.00            
ATOM    271  OW  HOH X  67      33.372  24.699  26.894  0.00  0.00            
ATOM    272  HW1 HOH X  67      32.722  24.838  26.205  0.00  0.00            
ATOM    273  HW2 HOH X  67      33.707  25.574  27.088  0.00  0.00            
ATOM    274  OW  HOH X  68      19.734  21.418  23.473  0.00  0.00            
ATOM    275  HW1 HOH X  68      19.244  22.238  23.416  0.00  0.00            
ATOM    276  HW2 HOH X  68      20.643  21.691  23.603  0.00  0.00            
ATOM    277  OW  HOH X  69      25.873  15.328  28.225  0.00  0.00            
ATOM    278  HW1 HOH X  69      26.557  15.729  28.761  0.00  0.00            
ATOM    279  HW2 HOH X  69      25.255  16.039  28.053  0.00  0.00            
ATOM    280  OW  HOH X  70      20.907  16.574  25.961  0.00  0.00            
ATOM    281  HW1 HOH X  70      20.949  17.524  25.846  0.00  0.00            
ATOM    282  HW2 HOH X  70      20.700  16.453  26.887  0.00  0.00            
ATOM    283  OW  HOH X  71      37.163   3.676  29.702  0.00  0.00            
ATOM    284  HW1 HOH X  71      37.332   4.295  30.412  0.00  0.00            
ATOM    285  HW2 HOH X  71      37.827   2.995  29.815  0.00  0.00            
ATOM    286  OW  HOH X  72      38.027   0.573  37.751  0.00  0.00            
ATOM    287  HW1 HOH X  72      38.786   1.045  38.094  0.00  0.00            
ATOM    288  HW2 HOH X  72      37.279   0.956  38.210  0.00  0.00            
ATOM    289  OW  HOH X  73      16.761   3.339  29.155  0.00  0.00            
ATOM    290  HW1 HOH X  73      17.544   3.734  29.538  0.00  0.00            
ATOM    291  HW2 HOH X  73      16.081   4.005  29.259  0.00  0.00            
ATOM    292  OW  HOH X  74      14.865   4.566  16.273  0.00  0.00            
ATOM    293  HW1 HOH X  74      14.275   5.311  16.387  0.00  0.00            
ATOM    294  HW2 HOH X  74      14.547   4.126  15.484  0.00  0.00            
ATOM    295  OW  HOH X  75      35.103   1.823  29.019  0.00  0.00            
ATOM    296  HW1 HOH X  75      35.517   2.600  29.395  0.00  0.00            
ATOM    297  HW2 HOH X  75      34.304   2.152  28.608  0.00  0.00            
ATOM    298  OW  HOH X  76      30.028   6.041   8.403  0.00  0.00            
ATOM    299  HW1 HOH X  76      29.859   6.734   9.041  0.00  0.00            
ATOM    300  HW2 HOH X  76      30.616   5.436   8.856  0.00  0.00            
ATOM    301  OW  HOH X  77      20.065   3.315   1.526  0.00  0.00            
ATOM    302  HW1 HOH X  77      20.753   3.006   0.937  0.00  0.00            
ATOM    303  HW2 HOH X  77      20.051   2.673   2.236  0.00  0.00            
ATOM    304  OW  HOH X  78      16.140  26.781  17.303  0.00  0.00            
ATOM    305  HW1 HOH X  78      16.792  27.139  17.906  0.00  0.00            
ATOM    306  HW2 HOH X  78      15.301  26.933  17.739  0.00  0.00            
ATOM    307  OW  HOH X  79      22.107  13.149  13.683  0.00  0.00            
ATOM    308  HW1 HOH X  79      21.211  12.845  13.828  0.00  0.00            
ATOM    309  HW2 HOH X  79      22.616  12.734  14.380  0.00  0.00            
ATOM    310  OW  HOH X  80      27.424  25.030  27.312  0.00  0.00            
ATOM    311  HW1 HOH X  80      28.289  24.870  26.934  0.00  0.00            
ATOM    312  HW2 HOH X  80      27.434  24.557  28.144  0.00  0.00            
ATOM    313  OW  HOH X  81      10.412   7.344  17.863  0.00  0.00            
ATOM    314  HW1 HOH X  81       9.520   7.025  17.726  0.00  0.00            
ATOM    315  HW2 HOH X  81      10.394   7.741  18.734  0.00  0.00            
ATOM    316  OW  HOH X  82      22.093  22.172  10.572  0.00  0.00            
ATOM    317  HW1 HOH X  82      22.531  21.934   9.754  0.00  0.00            
ATOM    318  HW2 HOH X  82      22.529  22.976  10.852  0.00  0.00            
ATOM    319  OW  HOH X  83      14.721  21.870  15.967  0.00  0.00            
ATOM    320  HW1 HOH X  83      15.225  22.667  16.129  0.00  0.00            
ATOM    321  HW2 HOH X  83      14.523  21.530  16.840  0.00  0.00            
ATOM    322  OW  HOH X  84      20.858  19.602  26.842  0.00  0.00            
ATOM    323  HW1 HOH X  84      20.907  20.094  27.661  0.00  0.00            
ATOM    324  HW2 HOH X  84      21.735  19.674  26.465  0.00  0.00            
ATOM    325  OW  HOH X  85      14.994   6.346  25.419  0.00  0.00            
ATOM    326  HW1 HOH X  85      14.645   7.237  25.428  0.00  0.00            
ATOM    327  HW2 HOH X  85      14.975   6.071  26.336  0.00  0.00            
ATOM    328  OW  HOH X  86      10.398  25.457  12.729  0.00  0.00            
ATOM    329  HW1 HOH X  86      11.059  26.065  13.060  0.00  0.00            
ATOM    330  HW2 HOH X  86      10.816  25.034  11.978  0.00  0.00            
ATOM    331  OW  HOH X  87      13.631   4.421  13.688  0.00  0.00            
ATOM    332  HW1 HOH X  87      13.632   4.282  12.742  0.00  0.00            
ATOM    333  HW2 HOH X  87      12.705   4.483  13.921  0.00  0.00            
ATOM    334  OW  HOH X  88      23.674   9.712   3.708  0.00  0.00            
ATOM    335  HW1 HOH X  88      23.166   9.507   4.492  0.00  0.00            
ATOM    336  HW2 HOH X  88      24.529   9.312   3.865  0.00  0.00            
ATOM    337  OW  HOH X  89      25.008   8.695   1.231  0.00  0.00            
ATOM    338  HW1 HOH X  89      24.201   8.615   1.740  0.00  0.00            
ATOM    339  HW2 HOH X  89      25.455   9.453   1.607  0.00  0.00            
ATOM    340  OW  HOH X  90      20.576  14.444   7.983  0.00  0.00            
ATOM    341  HW1 HOH X  90      21.015  15.157   8.448  0.00  0.00            
ATOM    342  HW2 HOH X  90      20.785  13.661   8.492  0.00  0.00            
ATOM    343  OW  HOH X  91      12.138  24.302  11.023  0.00  0.00            
ATOM    344  HW1 HOH X  91      11.554  23.775  10.478  0.00  0.00            
ATOM    345  HW2 HOH X  91      12.683  23.662  11.480  0.00  0.00            
ATOM    346  OW  HOH X  92      23.170  20.016  28.587  0.00  0.00            
ATOM    347  HW1 HOH X  92      22.928  20.936  28.688  0.00  0.00            
ATOM    348  HW2 HOH X  92      24.025  20.038  28.157  0.00  0.00            
ATOM    349  OW  HOH X  93      41.940   3.460  25.849  0.00  0.00            
ATOM    350  HW1 HOH X  93      41.401   3.179  26.588  0.00  0.00            
ATOM    351  HW2 HOH X  93      42.689   3.899  26.252  0.00  0.00            
ATOM    352  OW  HOH X  94      31.146  17.549  35.877  0.00  0.00            
ATOM    353  HW1 HOH X  94      30.268  17.797  36.167  0.00  0.00            
ATOM    354  HW2 HOH X  94      31.298  16.693  36.279  0.00  0.00            
ATOM    355  OW  HOH X  95      19.296  17.528  11.202  0.00  0.00            
ATOM    356  HW1 HOH X  95      19.799  18.339  11.125  0.00  0.00            
ATOM    357  HW2 HOH X  95      18.382  17.807  11.162  0.00  0.00            
ATOM    358  OW  HOH X  96      44.029   6.652  23.966  0.00  0.00            
ATOM    359  HW1 HOH X  96      43.264   6.956  24.455  0.00  0.00            
ATOM    360  HW2 HOH X  96      44.346   5.897  24.461  0.00  0.00            
ATOM    361  OW  HOH X  97      12.894  10.600  28.618  0.00  0.00            
ATOM    362  HW1 HOH X  97      12.815   9.713  28.969  0.00  0.00            
ATOM    363  HW2 HOH X  97      12.154  11.075  28.996  0.00  0.00            
ATOM    364  OW  HOH X  98      28.081  -4.846  21.534  0.00  0.00            
ATOM    365  HW1 HOH X  98      29.022  -4.997  21.625  0.00  0.00            
ATOM    366  HW2 HOH X  98      27.692  -5.718  21.584  0.00  0.00            
ATOM    367  OW  HOH X  99      30.437  16.587   8.553  0.00  0.00            
ATOM    368  HW1 HOH X  99      30.485  17.541   8.618  0.00  0.00            
ATOM    369  HW2 HOH X  99      30.362  16.413   7.615  0.00  0.00            
ATOM    370  OW  HOH X 100      30.958  25.254  20.465  0.00  0.00            
ATOM    371  HW1 HOH X 100      30.641  24.437  20.851  0.00  0.00            
ATOM    372  HW2 HOH X 100      31.719  24.996  19.946  0.00  0.00            
ATOM    373  OW  HOH X 101      26.111  -5.692  15.522  0.00  0.00            
ATOM    374  HW1 HOH X 101      26.668  -6.072  16.201  0.00  0.00            
ATOM    375  HW2 HOH X 101      25.900  -4.817  15.847  0.00  0.00            
ATOM    376  OW  HOH X 102      13.325   7.146  15.090  0.00  0.00            
ATOM    377  HW1 HOH X 102      12.974   7.802  14.487  0.00  0.00            
ATOM    378  HW2 HOH X 102      13.719   6.485  14.521  0.00  0.00            
ATOM    379  OW  HOH X 103      29.549  19.861  33.976  0.00  0.00            
ATOM    380  HW1 HOH X 103      29.674  18.975  33.635  0.00  0.00            
ATOM    381  HW2 HOH X 103      28.629  20.058  33.800  0.00  0.00            
ATOM    382  OW  HOH X 104      19.151   3.865  21.116  0.00  0.00            
ATOM    383  HW1 HOH X 104      18.441   3.559  20.552  0.00  0.00            
ATOM    384  HW2 HOH X 104      19.896   3.974  20.525  0.00  0.00            
ATOM    385  OW  HOH X 105      23.293  21.236  25.442  0.00  0.00            
ATOM    386  HW1 HOH X 105      22.917  21.742  24.722  0.00  0.00            
ATOM    387  HW2 HOH X 105      23.361  21.860  26.164  0.00  0.00            
ATOM    388  OW  HOH X 106      41.186  16.072  19.715  0.00  0.00            
ATOM    389  HW1 HOH X 106      41.267  15.486  20.468  0.00  0.00            
ATOM    390  HW2 HOH X 106      41.920  16.679  19.804  0.00  0.00            
ATOM    391  OW  HOH X 107      51.431   4.600  19.892  0.00  0.00            
ATOM    392  HW1 HOH X 107      51.271   5.160  19.132  0.00  0.00            
ATOM    393  HW2 HOH X 107      51.893   5.164  20.512  0.00  0.00            
ATOM    394  OW  HOH X 108      40.303   8.387   8.565  0.00  0.00            
ATOM    395  HW1 HOH X 108      39.470   8.532   8.117  0.00  0.00            
ATOM    396  HW2 HOH X 108      40.364   7.436   8.658  0.00  0.00            
ATOM    397  OW  HOH X 109      41.681  17.058  35.443  0.00  0.00            
ATOM    398  HW1 HOH X 109      40.989  17.265  36.071  0.00  0.00            
ATOM    399  HW2 HOH X 109      41.310  16.365  34.897  0.00  0.00            
ATOM    400  OW  HOH X 110      20.522  11.743  30.391  0.00  0.00            
ATOM    401  HW1 HOH X 110      21.155  11.259  30.920  0.00  0.00            
ATOM    402  HW2 HOH X 110      20.566  11.333  29.528  0.00  0.00            
ATOM    403  OW  HOH X 111      40.752  -0.824  23.833  0.00  0.00            
ATOM    404  HW1 HOH X 111      41.442  -1.423  23.549  0.00  0.00            
ATOM    405  HW2 HOH X 111      41.106   0.049  23.662  0.00  0.00            
ATOM    406  OW  HOH X 112      23.298  -0.265  15.088  0.00  0.00            
ATOM    407  HW1 HOH X 112      22.992   0.600  14.815  0.00  0.00            
ATOM    408  HW2 HOH X 112      22.506  -0.801  15.119  0.00  0.00            
ATOM    409  OW  HOH X 113      40.858  16.744  12.269  0.00  0.00            
ATOM    410  HW1 HOH X 113      41.532  16.864  11.600  0.00  0.00            
ATOM    411  HW2 HOH X 113      40.225  16.149  11.869  0.00  0.00            
ATOM    412  OW  HOH X 114      24.110   7.142  -2.005  0.00  0.00            
ATOM    413  HW1 HOH X 114      24.914   6.671  -1.785  0.00  0.00            
ATOM    414  HW2 HOH X 114      24.182   7.973  -1.536  0.00  0.00            
ATOM    415  OW  HOH X 115      20.504  -0.841  26.889  0.00  0.00            
ATOM    416  HW1 HOH X 115      20.247  -1.636  26.421  0.00  0.00            
ATOM    417  HW2 HOH X 115      20.333  -1.039  27.810  0.00  0.00            
ATOM    418  OW  HOH X 116      35.550  -0.360  13.852  0.00  0.00            
ATOM    419  HW1 HOH X 116      35.503   0.553  14.135  0.00  0.00            
ATOM    420  HW2 HOH X 116      36.409  -0.439  13.437  0.00  0.00            
ATOM    421  OW  HOH X 117      28.587  14.485   2.060  0.00  0.00            
ATOM    422  HW1 HOH X 117      28.577  14.746   2.981  0.00  0.00            
ATOM    423  HW2 HOH X 117      28.977  13.611   2.063  0.00  0.00            
ATOM    424  OW  HOH X 118      21.611  27.821  17.826  0.00  0.00            
ATOM    425  HW1 HOH X 118      22.503  28.154  17.917  0.00  0.00            
ATOM    426  HW2 HOH X 118      21.052  28.573  18.021  0.00  0.00            
ATOM    427  OW  HOH X 119      41.173  20.890  18.274  0.00  0.00            
ATOM    428  HW1 HOH X 119      40.257  20.894  17.999  0.00  0.00            
ATOM    429  HW2 HOH X 119      41.473  21.786  18.124  0.00  0.00            
ATOM    430  OW  HOH X 120      50.968  16.190  21.153  0.00  0.00            
ATOM    431  HW1 HOH X 120      50.515  17.031  21.105  0.00  0.00            
ATOM    432  HW2 HOH X 120      51.870  16.415  21.379  0.00  0.00            
ATOM    433  OW  HOH X 121      38.568   1.082  25.502  0.00  0.00            
ATOM    434  HW1 HOH X 121      39.311   1.458  25.030  0.00  0.00            
ATOM    435  HW2 HOH X 121      38.279   0.353  24.953  0.00  0.00            
ATOM    436  OW  HOH X 122      10.840   5.018  14.476  0.00  0.00            
ATOM    437  HW1 HOH X 122      10.885   5.974  14.501  0.00  0.00            
ATOM    438  HW2 HOH X 122      10.072   4.801  15.003  0.00  0.00            
ATOM    439  OW  HOH X 123       8.302   9.936  18.578  0.00  0.00            
ATOM    440  HW1 HOH X 123       7.423  10.135  18.901  0.00  0.00            
ATOM    441  HW2 HOH X 123       8.887  10.429  19.153  0.00  0.00            
ATOM    442  OW  HOH X 124      35.509   1.494  22.298  0.00  0.00            
ATOM    443  HW1 HOH X 124      35.126   2.227  22.780  0.00  0.00            
ATOM    444  HW2 HOH X 124      36.451   1.658  22.318  0.00  0.00            
ATOM    445  OW  HOH X 125      36.949  22.955  33.670  0.00  0.00            
ATOM    446  HW1 HOH X 125      36.148  23.428  33.445  0.00  0.00            
ATOM    447  HW2 HOH X 125      36.649  22.082  33.924  0.00  0.00            
ATOM    448  OW  HOH X 126      38.022  13.082   5.369  0.00  0.00            
ATOM    449  HW1 HOH X 126      37.504  12.596   6.010  0.00  0.00            
ATOM    450  HW2 HOH X 126      38.116  12.480   4.630  0.00  0.00            
ATOM    451  OW  HOH X 127      22.208  23.142  17.074  0.00  0.00            
ATOM    452  HW1 HOH X 127      21.788  23.911  17.460  0.00  0.00            
ATOM    453  HW2 HOH X 127      23.006  23.021  17.590  0.00  0.00            
ATOM    454  OW  HOH X 128      17.007   3.980  32.980  0.00  0.00            
ATOM    455  HW1 HOH X 128      16.386   4.666  32.737  0.00  0.00            
ATOM    456  HW2 HOH X 128      17.566   4.387  33.642  0.00  0.00            
ATOM    457  OW  HOH X 129      18.485   6.843  32.787  0.00  0.00            
ATOM    458  HW1 HOH X 129      19.186   6.882  32.136  0.00  0.00            
ATOM    459  HW2 HOH X 129      17.710   6.583  32.289  0.00  0.00            
ATOM    460  OW  HOH X 130      36.319  20.281  34.367  0.00  0.00            
ATOM    461  HW1 HOH X 130      37.106  20.010  34.839  0.00  0.00            
ATOM    462  HW2 HOH X 130      36.431  19.923  33.486  0.00  0.00            
ATOM    463  OW  HOH X 131      48.492  14.908  19.953  0.00  0.00            
ATOM    464  HW1 HOH X 131      49.369  15.013  20.323  0.00  0.00            
ATOM    465  HW2 HOH X 131      48.089  14.219  20.482  0.00  0.00            
ATOM    466  OW  HOH X 132      13.975  -1.666  12.697  0.00  0.00            
ATOM    467  HW1 HOH X 132      14.850  -1.678  12.309  0.00  0.00            
ATOM    468  HW2 HOH X 132      13.394  -1.437  11.973  0.00  0.00            
ATOM    469  OW  HOH X 133      24.439  12.991   3.025  0.00  0.00            
ATOM    470  HW1 HOH X 133      24.813  13.270   2.189  0.00  0.00            
ATOM    471  HW2 HOH X 133      23.498  12.939   2.861  0.00  0.00            
ATOM    472  OW  HOH X 134      28.229  14.217  30.011  0.00  0.00            
ATOM    473  HW1 HOH X 134      29.084  14.460  29.654  0.00  0.00            
ATOM    474  HW2 HOH X 134      28.112  14.791  30.767  0.00  0.00            
ATOM    475  OW  HOH X 135      37.320  11.816  13.171  0.00  0.00            
ATOM    476  HW1 HOH X 135      37.475  12.288  12.353  0.00  0.00            
ATOM    477  HW2 HOH X 135      37.638  12.407  13.853  0.00  0.00            
ATOM    478  OW  HOH X 136      21.441   7.431  13.503  0.00  0.00            
ATOM    479  HW1 HOH X 136      20.722   6.912  13.862  0.00  0.00            
ATOM    480  HW2 HOH X 136      22.053   7.530  14.233  0.00  0.00            
ATOM    481  OW  HOH X 137      20.746  15.585  12.816  0.00  0.00            
ATOM    482  HW1 HOH X 137      21.253  16.153  13.396  0.00  0.00            
ATOM    483  HW2 HOH X 137      21.134  14.718  12.929  0.00  0.00            
ATOM    484  OW  HOH X 138      32.227  25.278  24.598  0.00  0.00            
ATOM    485  HW1 HOH X 138      32.516  26.182  24.472  0.00  0.00            
ATOM    486  HW2 HOH X 138      32.273  24.887  23.725  0.00  0.00            
ATOM    487  OW  HOH X 139      39.631  -2.842  29.263  0.00  0.00            
ATOM    488  HW1 HOH X 139      38.959  -2.304  29.682  0.00  0.00            
ATOM    489  HW2 HOH X 139      39.527  -2.670  28.327  0.00  0.00            
ATOM    490  OW  HOH X 140      44.193  -5.580  31.654  0.00  0.00            
ATOM    491  HW1 HOH X 140      43.255  -5.521  31.836  0.00  0.00            
ATOM    492  HW2 HOH X 140      44.288  -6.379  31.136  0.00  0.00            
ATOM    493  OW  HOH X 141      43.690  12.237  32.628  0.00  0.00            
ATOM    494  HW1 HOH X 141      43.272  13.040  32.939  0.00  0.00            
ATOM    495  HW2 HOH X 141      43.494  11.588  33.304  0.00  0.00            
ATOM    496  OW  HOH X 142      28.423   8.230   3.674  0.00  0.00            
ATOM    497  HW1 HOH X 142      28.564   8.724   2.866  0.00  0.00            
ATOM    498  HW2 HOH X 142      28.960   7.444   3.571  0.00  0.00            
ATOM    499  OW  HOH X 143      30.694  -5.632  22.418  0.00  0.00            
ATOM    500  HW1 HOH X 143      30.782  -6.582  22.496  0.00  0.00            
ATOM    501  HW2 HOH X 143      30.242  -5.366  23.219  0.00  0.00            
ATOM    502  OW  HOH X 144      16.953  -6.532  14.250  0.00  0.00            
ATOM    503  HW1 HOH X 144      16.956  -6.051  15.078  0.00  0.00            
ATOM    504  HW2 HOH X 144      16.421  -5.995  13.663  0.00  0.00            
ATOM    505  OW  HOH X 145      28.763  12.024  -1.673  0.00  0.00            
ATOM    506  HW1 HOH X 145      28.805  11.414  -2.410  0.00  0.00            
ATOM    507  HW2 HOH X 145      28.337  11.528  -0.974  0.00  0.00            
ATOM    508  OW  HOH X 146      47.223  13.051  21.356  0.00  0.00            
ATOM    509  HW1 HOH X 146      46.275  12.919  21.385  0.00  0.00            
ATOM    510  HW2 HOH X 146      47.560  12.530  22.085  0.00  0.00            
ATOM    511  OW  HOH X 147      25.318   6.114  29.766  0.00  0.00            
ATOM    512  HW1 HOH X 147      24.453   5.707  29.821  0.00  0.00            
ATOM    513  HW2 HOH X 147      25.727   5.706  29.002  0.00  0.00            
ATOM    514  OW  HOH X 148      16.868   5.345  21.987  0.00  0.00            
ATOM    515  HW1 HOH X 148      17.044   6.268  21.803  0.00  0.00            
ATOM    516  HW2 HOH X 148      17.705   4.906  21.837  0.00  0.00            
ATOM    517  OW  HOH X 149      29.751  10.032  30.228  0.00  0.00            
ATOM    518  HW1 HOH X 149      29.126   9.439  30.644  0.00  0.00            
ATOM    519  HW2 HOH X 149      30.421   9.455  29.861  0.00  0.00            
ATOM    520  OW  HOH X 150      24.329  18.708  31.153  0.00  0.00            
ATOM    521  HW1 HOH X 150      24.066  18.603  30.239  0.00  0.00            
ATOM    522  HW2 HOH X 150      25.285  18.723  31.127  0.00  0.00            
ATOM    523  OW  HOH X 151      38.191   9.989  37.182  0.00  0.00            
ATOM    524  HW1 HOH X 151      37.831   9.412  36.509  0.00  0.00            
ATOM    525  HW2 HOH X 151      39.139   9.872  37.117  0.00  0.00            
ATOM    526  OW  HOH X 152      18.532   6.161   7.460  0.00  0.00            
ATOM    527  HW1 HOH X 152      18.652   6.421   6.547  0.00  0.00            
ATOM    528  HW2 HOH X 152      19.418   6.141   7.822  0.00  0.00            
ATOM    529  OW  HOH X 153      50.124   0.103  24.833  0.00  0.00            
ATOM    530  HW1 HOH X 153      49.475   0.509  24.258  0.00  0.00            
ATOM    531  HW2 HOH X 153      50.967   0.402  24.493  0.00  0.00            
ATOM    532  OW  HOH X 154      41.733  18.936  15.973  0.00  0.00            
ATOM    533  HW1 HOH X 154      41.242  19.188  15.191  0.00  0.00            
ATOM    534  HW2 HOH X 154      41.395  19.507  16.662  0.00  0.00            
ATOM    535  OW  HOH X 155      44.949   5.676  13.397  0.00  0.00            
ATOM    536  HW1 HOH X 155      45.772   5.258  13.648  0.00  0.00            
ATOM    537  HW2 HOH X 155      44.274   5.170  13.849  0.00  0.00            
ATOM    538  OW  HOH X 156      24.695   5.968  13.678  0.00  0.00            
ATOM    539  HW1 HOH X 156      24.355   6.515  14.386  0.00  0.00            
ATOM    540  HW2 HOH X 156      25.634   5.905  13.852  0.00  0.00            
ATOM    541  OW  HOH X 157      44.164   1.399  19.586  0.00  0.00            
ATOM    542  HW1 HOH X 157      44.107   0.475  19.829  0.00  0.00            
ATOM    543  HW2 HOH X 157      44.813   1.422  18.883  0.00  0.00            
ATOM    544  OW  HOH X 158      25.213  11.834  34.918  0.00  0.00            
ATOM    545  HW1 HOH X 158      24.272  11.930  35.062  0.00  0.00            
ATOM    546  HW2 HOH X 158      25.522  12.724  34.748  0.00  0.00            
ATOM    547  OW  HOH X 159      31.047  15.450   5.711  0.00  0.00            
ATOM    548  HW1 HOH X 159      31.517  15.670   4.907  0.00  0.00            
ATOM    549  HW2 HOH X 159      30.122  15.507   5.473  0.00  0.00            
ATOM    550  OW  HOH X 160      24.727  18.814  19.444  0.00  0.00            
ATOM    551  HW1 HOH X 160      24.834  18.373  20.286  0.00  0.00            
ATOM    552  HW2 HOH X 160      23.824  19.131  19.453  0.00  0.00            
ATOM    553  OW  HOH X 161      28.362  12.593   5.772  0.00  0.00            
ATOM    554  HW1 HOH X 161      27.405  12.585   5.750  0.00  0.00            
ATOM    555  HW2 HOH X 161      28.579  12.816   6.677  0.00  0.00            
ATOM    556  OW  HOH X 162      41.831   8.953  30.292  0.00  0.00            
ATOM    557  HW1 HOH X 162      41.903   9.505  29.514  0.00  0.00            
ATOM    558  HW2 HOH X 162      40.923   9.057  30.576  0.00  0.00            
ATOM    559  OW  HOH X 163      15.453  13.387  27.801  0.00  0.00            
ATOM    560  HW1 HOH X 163      15.041  13.994  28.416  0.00  0.00            
ATOM    561  HW2 HOH X 163      15.804  13.947  27.109  0.00  0.00            
ATOM    562  OW  HOH X 164      37.536  25.224  35.083  0.00  0.00            
ATOM    563  HW1 HOH X 164      37.519  24.270  35.005  0.00  0.00            
ATOM    564  HW2 HOH X 164      38.292  25.494  34.563  0.00  0.00            
ATOM    565  OW  HOH X 165      37.142  10.902  26.107  0.00  0.00            
ATOM    566  HW1 HOH X 165      37.514  11.784  26.102  0.00  0.00            
ATOM    567  HW2 HOH X 165      37.813  10.356  25.697  0.00  0.00            
ATOM    568  OW  HOH X 166      41.195  15.895  28.792  0.00  0.00            
ATOM    569  HW1 HOH X 166      40.405  15.483  29.141  0.00  0.00            
ATOM    570  HW2 HOH X 166      40.895  16.369  28.015  0.00  0.00            
ATOM    571  OW  HOH X 167      50.482  10.861  11.099  0.00  0.00            
ATOM    572  HW1 HOH X 167      49.947  10.110  11.355  0.00  0.00            
ATOM    573  HW2 HOH X 167      51.384  10.544  11.153  0.00  0.00            
ATOM    574  OW  HOH X 168      26.175  10.511  10.514  0.00  0.00            
ATOM    575  HW1 HOH X 168      26.576  10.469   9.646  0.00  0.00            
ATOM    576  HW2 HOH X 168      26.915  10.510  11.121  0.00  0.00            
ATOM    577  OW  HOH X 169      38.236   8.721   5.243  0.00  0.00            
ATOM    578  HW1 HOH X 169      38.168   8.606   6.191  0.00  0.00            
ATOM    579  HW2 HOH X 169      39.026   9.248   5.121  0.00  0.00            
ATOM    580  OW  HOH X 170      27.531   6.045   1.026  0.00  0.00            
ATOM    581  HW1 HOH X 170      27.783   6.641   1.731  0.00  0.00            
ATOM    582  HW2 HOH X 170      28.250   5.415   0.975  0.00  0.00            
ATOM    583  OW  HOH X 171      31.799  11.312  16.739  0.00  0.00            
ATOM    584  HW1 HOH X 171      31.541  11.253  15.819  0.00  0.00            
ATOM    585  HW2 HOH X 171      31.174  11.927  17.124  0.00  0.00            
ATOM    586  OW  HOH X 172      31.700  -1.766  15.985  0.00  0.00            
ATOM    587  HW1 HOH X 172      32.309  -2.254  15.432  0.00  0.00            
ATOM    588  HW2 HOH X 172      31.207  -2.440  16.454  0.00  0.00            
ATOM    589  OW  HOH X 173      29.835  20.394  16.534  0.00  0.00            
ATOM    590  HW1 HOH X 173      30.689  20.383  16.102  0.00  0.00            
ATOM    591  HW2 HOH X 173      29.281  19.839  15.985  0.00  0.00            
ATOM    592  OW  HOH X 174      37.040  -8.740  25.106  0.00  0.00            
ATOM    593  HW1 HOH X 174      37.124  -7.993  25.698  0.00  0.00            
ATOM    594  HW2 HOH X 174      37.823  -9.266  25.270  0.00  0.00            
ATOM    595  OW  HOH X 175      20.713  -7.401   9.059  0.00  0.00            
ATOM    596  HW1 HOH X 175      21.335  -6.888   9.575  0.00  0.00            
ATOM    597  HW2 HOH X 175      19.870  -7.256   9.487  0.00  0.00            
ATOM    598  OW  HOH X 176      25.567  12.370   5.277  0.00  0.00            
ATOM    599  HW1 HOH X 176      25.796  11.449   5.158  0.00  0.00            
ATOM    600  HW2 HOH X 176      25.157  12.624   4.450  0.00  0.00            
ATOM    601  OW  HOH X 177      23.330  -3.548   7.990  0.00  0.00            
ATOM    602  HW1 HOH X 177      23.256  -2.803   8.586  0.00  0.00            
ATOM    603  HW2 HOH X 177      22.953  -3.235   7.168  0.00  0.00            
ATOM    604  OW  HOH X 178      40.783  23.570  21.736  0.00  0.00            
ATOM    605  HW1 HOH X 178      40.131  22.891  21.911  0.00  0.00            
ATOM    606  HW2 HOH X 178      41.017  23.446  20.816  0.00  0.00            
ATOM    607  OW  HOH X 179      27.676  -4.914  11.455  0.00  0.00            
ATOM    608  HW1 HOH X 179      28.308  -4.931  12.174  0.00  0.00            
ATOM    609  HW2 HOH X 179      26.822  -4.944  11.885  0.00  0.00            
ATOM    610  OW  HOH X 180      39.493  -7.168  32.006  0.00  0.00            
ATOM    611  HW1 HOH X 180      38.966  -7.953  31.854  0.00  0.00            
ATOM    612  HW2 HOH X 180      40.124  -7.429  32.676  0.00  0.00            
ATOM    613  OW  HOH X 181      35.741  -0.709  34.057  0.00  0.00            
ATOM    614  HW1 HOH X 181      36.364  -1.422  34.197  0.00  0.00            
ATOM    615  HW2 HOH X 181      34.899  -1.068  34.336  0.00  0.00            
ATOM    616  OW  HOH X 182      24.154  -7.290  21.731  0.00  0.00            
ATOM    617  HW1 HOH X 182      24.969  -7.014  21.311  0.00  0.00            
ATOM    618  HW2 HOH X 182      23.500  -6.665  21.419  0.00  0.00            
ATOM    619  OW  HOH X 183      36.847  -2.351  27.674  0.00  0.00            
ATOM    620  HW1 HOH X 183      36.708  -3.012  28.351  0.00  0.00            
ATOM    621  HW2 HOH X 183      36.882  -1.522  28.151  0.00  0.00            
ATOM    622  OW  HOH X 184      35.943   9.806  11.687  0.00  0.00            
ATOM    623  HW1 HOH X 184      36.565  10.482  11.954  0.00  0.00            
ATOM    624  HW2 HOH X 184      35.650  10.079  10.817  0.00  0.00            
ATOM    625  OW  HOH X 185      30.675   6.547  23.909  0.00  0.00            
ATOM    626  HW1 HOH X 185      30.599   7.501  23.936  0.00  0.00            
ATOM    627  HW2 HOH X 185      30.369   6.306  23.035  0.00  0.00            
ATOM    628  OW  HOH X 186      23.114  24.369  11.856  0.00  0.00            
ATOM    629  HW1 HOH X 186      22.739  25.147  11.444  0.00  0.00            
ATOM    630  HW2 HOH X 186      22.769  24.379  12.749  0.00  0.00            
ATOM    631  OW  HOH X 187      26.101  20.939  15.007  0.00  0.00            
ATOM    632  HW1 HOH X 187      26.592  20.118  15.044  0.00  0.00            
ATOM    633  HW2 HOH X 187      25.660  20.993  15.854  0.00  0.00            
ATOM    634  OW  HOH X 188      33.319  19.319  12.991  0.00  0.00            
ATOM    635  HW1 HOH X 188      32.626  18.791  12.595  0.00  0.00            
ATOM    636  HW2 HOH X 188      34.079  18.738  13.015  0.00  0.00            
ATOM    637  OW  HOH X 189      31.989  11.133  43.855  0.00  0.00            
ATOM    638  HW1 HOH X 189      32.865  10.983  43.500  0.00  0.00            
ATOM    639  HW2 HOH X 189      31.625  10.256  43.974  0.00  0.00            
ATOM    640  OW  HOH X 190      25.973   5.235  -1.035  0.00  0.00            
ATOM    641  HW1 HOH X 190      26.496   5.793  -0.459  0.00  0.00            
ATOM    642  HW2 HOH X 190      25.758   4.472  -0.499  0.00  0.00            
ATOM    643  OW  HOH X 191      39.475   5.194  21.362  0.00  0.00            
ATOM    644  HW1 HOH X 191      39.621   5.198  22.308  0.00  0.00            
ATOM    645  HW2 HOH X 191      39.352   6.115  21.134  0.00  0.00            
ATOM    646  OW  HOH X 192      34.641  17.529  20.610  0.00  0.00            
ATOM    647  HW1 HOH X 192      34.307  17.294  21.475  0.00  0.00            
ATOM    648  HW2 HOH X 192      34.183  18.339  20.386  0.00  0.00            
ATOM    649  OW  HOH X 193      39.439  -5.787  22.087  0.00  0.00            
ATOM    650  HW1 HOH X 193      39.426  -6.558  21.521  0.00  0.00            
ATOM    651  HW2 HOH X 193      39.193  -5.062  21.511  0.00  0.00            
ATOM    652  OW  HOH X 194      41.596  29.442  31.612  0.00  0.00            
ATOM    653  HW1 HOH X 194      41.625  30.068  32.337  0.00  0.00            
ATOM    654  HW2 HOH X 194      42.360  29.658  31.078  0.00  0.00            
ATOM    655  OW  HOH X 195      19.424   6.583   4.942  0.00  0.00            
ATOM    656  HW1 HOH X 195      19.065   5.704   4.826  0.00  0.00            
ATOM    657  HW2 HOH X 195      20.297   6.540   4.551  0.00  0.00            
ATOM    658  OW  HOH X 196      37.309  23.922  26.932  0.00  0.00            
ATOM    659  HW1 HOH X 196      37.736  23.801  26.083  0.00  0.00            
ATOM    660  HW2 HOH X 196      37.572  23.156  27.443  0.00  0.00            
ATOM    661  OW  HOH X 197      23.963  15.207  16.768  0.00  0.00            
ATOM    662  HW1 HOH X 197      24.809  15.271  17.211  0.00  0.00            
ATOM    663  HW2 HOH X 197      23.457  15.944  17.110  0.00  0.00            
ATOM    664  OW  HOH X 198      26.737  -1.113  19.336  0.00  0.00            
ATOM    665  HW1 HOH X 198      26.860  -1.045  20.283  0.00  0.00            
ATOM    666  HW2 HOH X 198      27.350  -0.476  18.968  0.00  0.00            
ATOM    667  OW  HOH X 199      15.545  11.824  30.447  0.00  0.00            
ATOM    668  HW1 HOH X 199      15.662  12.177  29.565  0.00  0.00            
ATOM    669  HW2 HOH X 199      16.429  11.791  30.812  0.00  0.00            
ATOM    670  OW  HOH X 200      16.970   8.643  26.352  0.00  0.00            
ATOM    671  HW1 HOH X 200      16.719   9.532  26.606  0.00  0.00            
ATOM    672  HW2 HOH X 200      17.269   8.237  27.165  0.00  0.00            
ATOM    673  OW  HOH X 201      34.531  10.813  24.835  0.00  0.00            
ATOM    674  HW1 HOH X 201      35.486  10.794  24.788  0.00  0.00            
ATOM    675  HW2 HOH X 201      34.329  10.557  25.735  0.00  0.00            
ATOM    676  OW  HOH X 202      22.682   4.415   7.501  0.00  0.00            
ATOM    677  HW1 HOH X 202      23.224   4.410   6.712  0.00  0.00            
ATOM    678  HW2 HOH X 202      23.303   4.295   8.219  0.00  0.00            
ATOM    679  OW  HOH X 203      34.672  13.368  26.763  0.00  0.00            
ATOM    680  HW1 HOH X 203      35.358  13.444  26.099  0.00  0.00            
ATOM    681  HW2 HOH X 203      35.134  13.088  27.553  0.00  0.00            
ATOM    682  OW  HOH X 204      37.345   4.613  15.252  0.00  0.00            
ATOM    683  HW1 HOH X 204      37.160   5.545  15.369  0.00  0.00            
ATOM    684  HW2 HOH X 204      38.225   4.588  14.875  0.00  0.00            
ATOM    685  OW  HOH X 205      36.282  14.833   7.743  0.00  0.00            
ATOM    686  HW1 HOH X 205      35.612  15.250   7.201  0.00  0.00            
ATOM    687  HW2 HOH X 205      36.911  15.531   7.926  0.00  0.00            
ATOM    688  OW  HOH X 206      44.972   1.336  23.911  0.00  0.00            
ATOM    689  HW1 HOH X 206      44.680   0.963  23.079  0.00  0.00            
ATOM    690  HW2 HOH X 206      45.049   2.275  23.738  0.00  0.00            
ATOM    691  OW  HOH X 207      34.339   1.723  25.793  0.00  0.00            
ATOM    692  HW1 HOH X 207      34.416   2.137  24.933  0.00  0.00            
ATOM    693  HW2 HOH X 207      33.953   2.399  26.350  0.00  0.00            
ATOM    694  OW  HOH X 208      26.024   8.722  30.027  0.00  0.00            
ATOM    695  HW1 HOH X 208      26.745   8.620  30.648  0.00  0.00            
ATOM    696  HW2 HOH X 208      25.774   7.827  29.800  0.00  0.00            
ATOM    697  OW  HOH X 209      39.976   4.862  11.189  0.00  0.00            
ATOM    698  HW1 HOH X 209      40.707   5.392  11.506  0.00  0.00            
ATOM    699  HW2 HOH X 209      39.202   5.254  11.593  0.00  0.00            
ATOM    700  OW  HOH X 210      34.814  25.353  21.812  0.00  0.00            
ATOM    701  HW1 HOH X 210      35.359  26.122  21.981  0.00  0.00            
ATOM    702  HW2 HOH X 210      35.437  24.631  21.727  0.00  0.00            
ATOM    703  OW  HOH X 211       7.468   9.924  25.675  0.00  0.00            
ATOM    704  HW1 HOH X 211       8.397   9.691  25.676  0.00  0.00            
ATOM    705  HW2 HOH X 211       7.410  10.679  26.261  0.00  0.00            
ATOM    706  OW  HOH X 212      48.510   1.566  23.083  0.00  0.00            
ATOM    707  HW1 HOH X 212      47.999   0.878  22.658  0.00  0.00            
ATOM    708  HW2 HOH X 212      48.724   2.177  22.377  0.00  0.00            
ATOM    709  OW  HOH X 213       6.141   5.033  22.507  0.00  0.00            
ATOM    710  HW1 HOH X 213       6.580   5.634  21.905  0.00  0.00            
ATOM    711  HW2 HOH X 213       5.252   4.953  22.160  0.00  0.00            
ATOM    712  OW  HOH X 214      36.022  12.810  42.819  0.00  0.00            
ATOM    713  HW1 HOH X 214      36.623  13.146  42.155  0.00  0.00            
ATOM    714  HW2 HOH X 214      35.347  13.484  42.896  0.00  0.00            
ATOM    715  OW  HOH X 215      16.396  -4.872   7.377  0.00  0.00            
ATOM    716  HW1 HOH X 215      16.774  -5.399   6.672  0.00  0.00            
ATOM    717  HW2 HOH X 215      15.849  -5.485   7.868  0.00  0.00            
ATOM    718  OW  HOH X 216      17.334   6.238  18.504  0.00  0.00            
ATOM    719  HW1 HOH X 216      17.409   6.620  19.378  0.00  0.00            
ATOM    720  HW2 HOH X 216      16.476   6.524  18.189  0.00  0.00            
ATOM    721  OW  HOH X 217      28.120  21.399  11.943  0.00  0.00            
ATOM    722  HW1 HOH X 217      28.692  21.351  12.709  0.00  0.00            
ATOM    723  HW2 HOH X 217      27.749  22.281  11.976  0.00  0.00            
ATOM    724  OW  HOH X 218      13.110   1.696  16.856  0.00  0.00            
ATOM    725  HW1 HOH X 218      12.197   1.913  16.666  0.00  0.00            
ATOM    726  HW2 HOH X 218      13.408   2.397  17.435  0.00  0.00            
ATOM    727  OW  HOH X 219      23.476  10.384   9.858  0.00  0.00            
ATOM    728  HW1 HOH X 219      23.191   9.782  10.545  0.00  0.00            
ATOM    729  HW2 HOH X 219      24.319  10.717  10.165  0.00  0.00            
ATOM    730  OW  HOH X 220      20.086  19.603  14.166  0.00  0.00            
ATOM    731  HW1 HOH X 220      19.534  20.159  13.616  0.00  0.00            
ATOM    732  HW2 HOH X 220      19.609  18.775  14.225  0.00  0.00            
ATOM    733  OW  HOH X 221      45.045  15.586  19.407  0.00  0.00            
ATOM    734  HW1 HOH X 221      44.292  16.112  19.676  0.00  0.00            
ATOM    735  HW2 HOH X 221      44.934  14.755  19.867  0.00  0.00            
ATOM    736  OW  HOH X 222      31.681  12.119   8.608  0.00  0.00            
ATOM    737  HW1 HOH X 222      32.109  12.865   8.189  0.00  0.00            
ATOM    738  HW2 HOH X 222      31.220  11.676   7.896  0.00  0.00            
ATOM    739  OW  HOH X 223      20.377   2.943   7.115  0.00  0.00            
ATOM    740  HW1 HOH X 223      21.011   3.585   7.433  0.00  0.00            
ATOM    741  HW2 HOH X 223      19.980   3.356   6.349  0.00  0.00            
ATOM    742  OW  HOH X 224      23.901  10.406  15.701  0.00  0.00            
ATOM    743  HW1 HOH X 224      23.367  11.082  16.117  0.00  0.00            
ATOM    744  HW2 HOH X 224      24.758  10.815  15.581  0.00  0.00            
ATOM    745  OW  HOH X 225      32.998   1.006  19.045  0.00  0.00            
ATOM    746  HW1 HOH X 225      33.871   0.892  19.422  0.00  0.00            
ATOM    747  HW2 HOH X 225      32.617   1.731  19.540  0.00  0.00            
ATOM    748  OW  HOH X 226      36.409  17.044   9.392  0.00  0.00            
ATOM    749  HW1 HOH X 226      36.272  17.957   9.137  0.00  0.00            
ATOM    750  HW2 HOH X 226      35.556  16.628   9.261  0.00  0.00            
ATOM    751  OW  HOH X 227      20.551   1.409  -1.080  0.00  0.00            
ATOM    752  HW1 HOH X 227      21.302   2.002  -1.084  0.00  0.00            
ATOM    753  HW2 HOH X 227      19.831   1.931  -1.433  0.00  0.00            
ATOM    754  OW  HOH X 228      33.891  12.785  31.061  0.00  0.00            
ATOM    755  HW1 HOH X 228      33.982  11.860  30.831  0.00  0.00            
ATOM    756  HW2 HOH X 228      34.490  13.239  30.469  0.00  0.00            
ATOM    757  OW  HOH X 229      33.596  -3.506  14.385  0.00  0.00            
ATOM    758  HW1 HOH X 229      34.052  -3.909  13.646  0.00  0.00            
ATOM    759  HW2 HOH X 229      34.294  -3.120  14.915  0.00  0.00            
ATOM    760  OW  HOH X 230      35.958   4.085  26.571  0.00  0.00            
ATOM    761  HW1 HOH X 230      35.609   4.630  27.276  0.00  0.00            
ATOM    762  HW2 HOH X 230      36.684   3.608  26.973  0.00  0.00            
ATOM    763  OW  HOH X 231      38.455  13.119  26.745  0.00  0.00            
ATOM    764  HW1 HOH X 231      39.341  13.210  26.393  0.00  0.00            
ATOM    765  HW2 HOH X 231      38.489  13.556  27.596  0.00  0.00            
ATOM    766  OW  HOH X 232      22.905   3.489  25.192  0.00  0.00            
ATOM    767  HW1 HOH X 232      22.455   2.646  25.133  0.00  0.00            
ATOM    768  HW2 HOH X 232      22.201   4.136  25.220  0.00  0.00            
ATOM    769  OW  HOH X 233      36.528   9.811  28.532  0.00  0.00            
ATOM    770  HW1 HOH X 233      36.572   8.861  28.418  0.00  0.00            
ATOM    771  HW2 HOH X 233      36.720  10.166  27.664  0.00  0.00            
ATOM    772  OW  HOH X 234      45.506  23.606  30.247  0.00  0.00            
ATOM    773  HW1 HOH X 234      45.631  23.104  29.442  0.00  0.00            
ATOM    774  HW2 HOH X 234      46.301  23.445  30.756  0.00  0.00            
ATOM    775  OW  HOH X 235      33.861  -2.306  31.174  0.00  0.00            
ATOM    776  HW1 HOH X 235      33.574  -1.605  31.761  0.00  0.00            
ATOM    777  HW2 HOH X 235      34.033  -1.866  30.341  0.00  0.00            
ATOM    778  OW  HOH X 236      45.731  -1.243  24.272  0.00  0.00            
ATOM    779  HW1 HOH X 236      45.523  -0.309  24.280  0.00  0.00            
ATOM    780  HW2 HOH X 236      46.224  -1.373  23.462  0.00  0.00            
ATOM    781  OW  HOH X 237      47.571   6.503  26.265  0.00  0.00            
ATOM    782  HW1 HOH X 237      47.502   6.572  25.313  0.00  0.00            
ATOM    783  HW2 HOH X 237      47.742   5.575  26.427  0.00  0.00            
ATOM    784  OW  HOH X 238      22.937  24.957  21.814  0.00  0.00            
ATOM    785  HW1 HOH X 238      22.355  25.622  22.182  0.00  0.00            
ATOM    786  HW2 HOH X 238      22.693  24.911  20.889  0.00  0.00            
ATOM    787  OW  HOH X 239      11.375   5.897  20.630  0.00  0.00            
ATOM    788  HW1 HOH X 239      12.254   5.528  20.722  0.00  0.00            
ATOM    789  HW2 HOH X 239      11.521   6.829  20.469  0.00  0.00            
ATOM    790  OW  HOH X 240      15.954   6.861  14.411  0.00  0.00            
ATOM    791  HW1 HOH X 240      16.289   6.727  15.297  0.00  0.00            
ATOM    792  HW2 HOH X 240      16.718   6.748  13.846  0.00  0.00            
ATOM    793  OW  HOH X 241      28.913  22.547  23.227  0.00  0.00            
ATOM    794  HW1 HOH X 241      28.665  22.000  22.481  0.00  0.00            
ATOM    795  HW2 HOH X 241      29.755  22.193  23.514  0.00  0.00            
ATOM    796  OW  HOH X 242      26.656  18.187  15.945  0.00  0.00            
ATOM    797  HW1 HOH X 242      26.716  17.359  16.422  0.00  0.00            
ATOM    798  HW2 HOH X 242      25.737  18.442  16.021  0.00  0.00            
ATOM    799  OW  HOH X 243      26.895   2.737  21.744  0.00  0.00            
ATOM    800  HW1 HOH X 243      27.403   3.545  21.814  0.00  0.00            
ATOM    801  HW2 HOH X 243      26.048   2.951  22.135  0.00  0.00            
ATOM    802  OW  HOH X 244      33.353   4.647  17.918  0.00  0.00            
ATOM    803  HW1 HOH X 244      33.598   5.507  18.258  0.00  0.00            
ATOM    804  HW2 HOH X 244      33.279   4.094  18.696  0.00  0.00            
ATOM    805  OW  HOH X 245      51.830  14.158  17.350  0.00  0.00            
ATOM    806  HW1 HOH X 245      52.485  13.967  16.678  0.00  0.00            
ATOM    807  HW2 HOH X 245      51.772  13.353  17.865  0.00  0.00            
ATOM    808  OW  HOH X 246      35.627  21.788  23.021  0.00  0.00            
ATOM    809  HW1 HOH X 246      35.123  21.020  23.289  0.00  0.00            
ATOM    810  HW2 HOH X 246      35.279  22.502  23.556  0.00  0.00            
ATOM    811  OW  HOH X 247      16.616   1.702  13.486  0.00  0.00            
ATOM    812  HW1 HOH X 247      15.678   1.514  13.503  0.00  0.00            
ATOM    813  HW2 HOH X 247      16.808   1.882  12.566  0.00  0.00            
ATOM    814  OW  HOH X 248      27.913   0.815  28.417  0.00  0.00            
ATOM    815  HW1 HOH X 248      27.537   0.277  27.720  0.00  0.00            
ATOM    816  HW2 HOH X 248      28.081   0.199  29.131  0.00  0.00            
ATOM    817  OW  HOH X 249      39.198  13.799  19.081  0.00  0.00            
ATOM    818  HW1 HOH X 249      39.850  14.499  19.047  0.00  0.00            
ATOM    819  HW2 HOH X 249      39.350  13.369  19.923  0.00  0.00            
ATOM    820  OW  HOH X 250      22.751  20.584  22.704  0.00  0.00            
ATOM    821  HW1 HOH X 250      22.999  21.504  22.800  0.00  0.00            
ATOM    822  HW2 HOH X 250      23.508  20.175  22.284  0.00  0.00            
ATOM    823  OW  HOH X 251      41.623   7.066  16.385  0.00  0.00            
ATOM    824  HW1 HOH X 251      42.551   6.831  16.386  0.00  0.00            
ATOM    825  HW2 HOH X 251      41.618   8.020  16.305  0.00  0.00            
ATOM    826  OW  HOH X 252      30.328   8.218  37.969  0.00  0.00            
ATOM    827  HW1 HOH X 252      30.143   9.149  38.099  0.00  0.00            
ATOM    828  HW2 HOH X 252      30.478   7.878  38.851  0.00  0.00            
ATOM    829  OW  HOH X 253      44.376  15.890  23.117  0.00  0.00            
ATOM    830  HW1 HOH X 253      44.573  15.064  22.677  0.00  0.00            
ATOM    831  HW2 HOH X 253      44.676  15.760  24.017  0.00  0.00            
ATOM    832  OW  HOH X 254      44.490   6.556  16.618  0.00  0.00            
ATOM    833  HW1 HOH X 254      44.637   6.786  17.535  0.00  0.00            
ATOM    834  HW2 HOH X 254      45.196   6.995  16.144  0.00  0.00            
ATOM    835  OW  HOH X 255      39.228   6.683  30.054  0.00  0.00            
ATOM    836  HW1 HOH X 255      38.699   6.480  30.826  0.00  0.00            
ATOM    837  HW2 HOH X 255      39.502   7.591  30.184  0.00  0.00            
ATOM    838  OW  HOH X 256      28.793  -2.277  27.049  0.00  0.00            
ATOM    839  HW1 HOH X 256      29.396  -1.570  26.818  0.00  0.00            
ATOM    840  HW2 HOH X 256      27.923  -1.890  26.953  0.00  0.00            
ATOM    841  OW  HOH X 257      42.055  -6.915  23.925  0.00  0.00            
ATOM    842  HW1 HOH X 257      41.348  -6.606  23.358  0.00  0.00            
ATOM    843  HW2 HOH X 257      41.719  -6.795  24.813  0.00  0.00            
ATOM    844  OW  HOH X 258      37.363  19.971  21.458  0.00  0.00            
ATOM    845  HW1 HOH X 258      37.892  19.425  22.039  0.00  0.00            
ATOM    846  HW2 HOH X 258      36.678  20.329  22.023  0.00  0.00            
ATOM    847  OW  HOH X 259       7.565   9.127  21.233  0.00  0.00            
ATOM    848  HW1 HOH X 259       7.702   8.208  21.001  0.00  0.00            
ATOM    849  HW2 HOH X 259       6.858   9.417  20.656  0.00  0.00            
ATOM    850  OW  HOH X 260      30.846  13.780  27.509  0.00  0.00            
ATOM    851  HW1 HOH X 260      31.136  13.240  28.245  0.00  0.00            
ATOM    852  HW2 HOH X 260      30.454  13.158  26.896  0.00  0.00            
ATOM    853  OW  HOH X 261      42.065  10.567   8.518  0.00  0.00            
ATOM    854  HW1 HOH X 261      41.390  10.002   8.895  0.00  0.00            
ATOM    855  HW2 HOH X 261      42.609   9.976   7.998  0.00  0.00            
ATOM    856  OW  HOH X 262      29.666   6.051  31.356  0.00  0.00            
ATOM    857  HW1 HOH X 262      29.652   6.219  30.414  0.00  0.00            
ATOM    858  HW2 HOH X 262      29.317   6.851  31.748  0.00  0.00            
ATOM    859  OW  HOH X 263      32.533   1.477  13.922  0.00  0.00            
ATOM    860  HW1 HOH X 263      32.366   0.534  13.928  0.00  0.00            
ATOM    861  HW2 HOH X 263      32.702   1.697  14.838  0.00  0.00            
ATOM    862  OW  HOH X 264      30.452   5.794  36.982  0.00  0.00            
ATOM    863  HW1 HOH X 264      30.187   6.636  37.350  0.00  0.00            
ATOM    864  HW2 HOH X 264      30.109   5.803  36.089  0.00  0.00            
ATOM    865  OW  HOH X 265      40.845   3.519  16.775  0.00  0.00            
ATOM    866  HW1 HOH X 265      41.634   3.987  17.050  0.00  0.00            
ATOM    867  HW2 HOH X 265      40.201   3.713  17.456  0.00  0.00            
ATOM    868  OW  HOH X 266      16.460   4.396   7.772  0.00  0.00            
ATOM    869  HW1 HOH X 266      17.180   5.025   7.824  0.00  0.00            
ATOM    870  HW2 HOH X 266      16.695   3.820   7.045  0.00  0.00            
ATOM    871  OW  HOH X 267      42.730   5.050  28.248  0.00  0.00            
ATOM    872  HW1 HOH X 267      43.669   4.973  28.415  0.00  0.00            
ATOM    873  HW2 HOH X 267      42.327   4.997  29.115  0.00  0.00            
ATOM    874  OW  HOH X 268      13.056  15.742  26.568  0.00  0.00            
ATOM    875  HW1 HOH X 268      12.928  15.553  27.498  0.00  0.00            
ATOM    876  HW2 HOH X 268      12.946  16.691  26.499  0.00  0.00            
ATOM    877  OW  HOH X 269      43.213  23.666  31.850  0.00  0.00            
ATOM    878  HW1 HOH X 269      42.699  23.024  31.361  0.00  0.00            
ATOM    879  HW2 HOH X 269      43.989  23.815  31.310  0.00  0.00            
ATOM    880  OW  HOH X 270      20.534  22.391   7.037  0.00  0.00            
ATOM    881  HW1 HOH X 270      20.344  23.057   7.698  0.00  0.00            
ATOM    882  HW2 HOH X 270      21.297  21.925   7.378  0.00  0.00            
ATOM    883  OW  HOH X 271      26.791  24.432  17.467  0.00  0.00            
ATOM    884  HW1 HOH X 271      27.205  23.689  17.027  0.00  0.00            
ATOM    885  HW2 HOH X 271      27.250  25.199  17.125  0.00  0.00            
ATOM    886  OW  HOH X 272      18.926  24.260  13.632  0.00  0.00            
ATOM    887  HW1 HOH X 272      19.848  24.361  13.399  0.00  0.00            
ATOM    888  HW2 HOH X 272      18.936  23.728  14.428  0.00  0.00            
ATOM    889  OW  HOH X 273      21.260  16.610   9.651  0.00  0.00            
ATOM    890  HW1 HOH X 273      20.466  16.896  10.103  0.00  0.00            
ATOM    891  HW2 HOH X 273      21.957  16.719  10.298  0.00  0.00            
ATOM    892  OW  HOH X 274      12.651  11.314  25.610  0.00  0.00            
ATOM    893  HW1 HOH X 274      12.086  11.987  25.232  0.00  0.00            
ATOM    894  HW2 HOH X 274      12.945  11.685  26.442  0.00  0.00            
ATOM    895  OW  HOH X 275      21.646  -0.724   3.699  0.00  0.00            
ATOM    896  HW1 HOH X 275      21.421  -1.643   3.839  0.00  0.00            
ATOM    897  HW2 HOH X 275      21.887  -0.674   2.774  0.00  0.00            
ATOM    898  OW  HOH X 276      33.051   3.117  36.465  0.00  0.00            
ATOM    899  HW1 HOH X 276      32.353   2.544  36.147  0.00  0.00            
ATOM    900  HW2 HOH X 276      33.760   3.004  35.832  0.00  0.00            
ATOM    901  OW  HOH X 277      31.190  14.273  32.130  0.00  0.00            
ATOM    902  HW1 HOH X 277      30.748  13.588  31.629  0.00  0.00            
ATOM    903  HW2 HOH X 277      32.076  14.302  31.768  0.00  0.00            
ATOM    904  OW  HOH X 278      10.452  10.470  12.555  0.00  0.00            
ATOM    905  HW1 HOH X 278      10.952  11.165  12.981  0.00  0.00            
ATOM    906  HW2 HOH X 278       9.537  10.731  12.662  0.00  0.00            
ATOM    907  OW  HOH X 279      26.672  11.553   0.056  0.00  0.00            
ATOM    908  HW1 HOH X 279      26.645  11.425   1.004  0.00  0.00            
ATOM    909  HW2 HOH X 279      25.758  11.486  -0.221  0.00  0.00            
ATOM    910  OW  HOH X 280      18.630   6.160   1.423  0.00  0.00            
ATOM    911  HW1 HOH X 280      19.021   5.292   1.520  0.00  0.00            
ATOM    912  HW2 HOH X 280      19.357   6.723   1.156  0.00  0.00            
ATOM    913  OW  HOH X 281      30.582   3.309  25.267  0.00  0.00            
ATOM    914  HW1 HOH X 281      29.731   2.964  24.998  0.00  0.00            
ATOM    915  HW2 HOH X 281      30.721   2.949  26.143  0.00  0.00            
ATOM    916  OW  HOH X 282      25.740  14.134  25.471  0.00  0.00            
ATOM    917  HW1 HOH X 282      25.737  14.576  26.320  0.00  0.00            
ATOM    918  HW2 HOH X 282      26.566  13.650  25.455  0.00  0.00            
ATOM    919  OW  HOH X 283      26.553  -7.181  20.293  0.00  0.00            
ATOM    920  HW1 HOH X 283      26.884  -6.969  19.420  0.00  0.00            
ATOM    921  HW2 HOH X 283      27.071  -7.937  20.569  0.00  0.00            
ATOM    922  OW  HOH X 284      18.076  11.299   6.554  0.00  0.00            
ATOM    923  HW1 HOH X 284      17.504  10.835   5.943  0.00  0.00            
ATOM    924  HW2 HOH X 284      18.921  11.342   6.107  0.00  0.00            
ATOM    925  OW  HOH X 285      29.053  14.795  15.524  0.00  0.00            
ATOM    926  HW1 HOH X 285      29.618  15.493  15.194  0.00  0.00            
ATOM    927  HW2 HOH X 285      29.418  13.993  15.149  0.00  0.00            
ATOM    928  OW  HOH X 286      44.378  20.662  28.989  0.00  0.00            
ATOM    929  HW1 HOH X 286      44.565  19.791  28.640  0.00  0.00            
ATOM    930  HW2 HOH X 286      44.804  20.674  29.846  0.00  0.00            
ATOM    931  OW  HOH X 287      43.109  14.091  14.059  0.00  0.00            
ATOM    932  HW1 HOH X 287      43.748  14.705  13.696  0.00  0.00            
ATOM    933  HW2 HOH X 287      42.452  14.648  14.476  0.00  0.00            
ATOM    934  OW  HOH X 288      23.467   3.496  13.854  0.00  0.00            
ATOM    935  HW1 HOH X 288      23.542   3.056  13.007  0.00  0.00            
ATOM    936  HW2 HOH X 288      23.961   4.308  13.747  0.00  0.00            
ATOM    937  OW  HOH X 289      18.871  16.882  23.385  0.00  0.00            
ATOM    938  HW1 HOH X 289      19.100  17.803  23.515  0.00  0.00            
ATOM    939  HW2 HOH X 289      19.127  16.453  24.202  0.00  0.00            
ATOM    940  OW  HOH X 290      14.182   9.920  17.737  0.00  0.00            
ATOM    941  HW1 HOH X 290      13.637  10.277  18.438  0.00  0.00            
ATOM    942  HW2 HOH X 290      14.600  10.687  17.344  0.00  0.00            
ATOM    943  OW  HOH X 291      19.546  12.652  14.816  0.00  0.00            
ATOM    944  HW1 HOH X 291      19.831  13.060  15.633  0.00  0.00            
ATOM    945  HW2 HOH X 291      19.578  11.712  14.992  0.00  0.00            
ATOM    946  OW  HOH X 292      27.811  18.215   8.448  0.00  0.00            
ATOM    947  HW1 HOH X 292      28.491  18.880   8.339  0.00  0.00            
ATOM    948  HW2 HOH X 292      27.761  18.076   9.394  0.00  0.00            
ATOM    949  OW  HOH X 293      23.562  -5.228  10.294  0.00  0.00            
ATOM    950  HW1 HOH X 293      22.702  -5.422  10.666  0.00  0.00            
ATOM    951  HW2 HOH X 293      23.371  -4.827   9.445  0.00  0.00            
ATOM    952  OW  HOH X 294      43.643  -4.695  27.887  0.00  0.00            
ATOM    953  HW1 HOH X 294      43.554  -5.593  27.569  0.00  0.00            
ATOM    954  HW2 HOH X 294      43.842  -4.182  27.104  0.00  0.00            
ATOM    955  OW  HOH X 295      13.343   9.192  22.878  0.00  0.00            
ATOM    956  HW1 HOH X 295      13.559   8.468  22.291  0.00  0.00            
ATOM    957  HW2 HOH X 295      12.921   8.774  23.629  0.00  0.00            
ATOM    958  OW  HOH X 296      16.089  -0.696  15.335  0.00  0.00            
ATOM    959  HW1 HOH X 296      15.931  -0.408  14.436  0.00  0.00            
ATOM    960  HW2 HOH X 296      17.014  -0.944  15.349  0.00  0.00            
ATOM    961  OW  HOH X 297      31.607  11.919  36.618  0.00  0.00            
ATOM    962  HW1 HOH X 297      31.079  12.392  35.975  0.00  0.00            
ATOM    963  HW2 HOH X 297      31.947  12.600  37.198  0.00  0.00            
ATOM    964  OW  HOH X 298      35.089   1.398  38.090  0.00  0.00            
ATOM    965  HW1 HOH X 298      34.209   1.606  37.774  0.00  0.00            
ATOM    966  HW2 HOH X 298      34.970   0.623  38.638  0.00  0.00            
ATOM    967  OW  HOH X 299      33.119  14.428   7.448  0.00  0.00            
ATOM    968  HW1 HOH X 299      32.296  14.697   7.041  0.00  0.00            
ATOM    969  HW2 HOH X 299      33.796  14.727   6.841  0.00  0.00            
ATOM    970  OW  HOH X 300      16.915   4.659  24.852  0.00  0.00            
ATOM    971  HW1 HOH X 300      16.281   5.332  25.101  0.00  0.00            
ATOM    972  HW2 HOH X 300      16.890   4.647  23.895  0.00  0.00            
ATOM    973  OW  HOH X 301      19.922   6.321  36.826  0.00  0.00            
ATOM    974  HW1 HOH X 301      20.581   6.332  37.520  0.00  0.00            
ATOM    975  HW2 HOH X 301      19.288   6.989  37.087  0.00  0.00            
ATOM    976  OW  HOH X 302      29.902  23.803  28.867  0.00  0.00            
ATOM    977  HW1 HOH X 302      30.567  23.494  29.482  0.00  0.00            
ATOM    978  HW2 HOH X 302      29.931  23.173  28.147  0.00  0.00            
ATOM    979  OW  HOH X 303      44.502  11.525  12.277  0.00  0.00            
ATOM    980  HW1 HOH X 303      45.441  11.667  12.397  0.00  0.00            
ATOM    981  HW2 HOH X 303      44.445  10.844  11.607  0.00  0.00            
ATOM    982  OW  HOH X 304      31.204  -0.876  19.351  0.00  0.00            
ATOM    983  HW1 HOH X 304      31.598  -0.015  19.486  0.00  0.00            
ATOM    984  HW2 HOH X 304      31.425  -1.368  20.141  0.00  0.00            
ATOM    985  OW  HOH X 305       8.378  13.190  24.959  0.00  0.00            
ATOM    986  HW1 HOH X 305       7.706  13.114  25.637  0.00  0.00            
ATOM    987  HW2 HOH X 305       7.897  13.108  24.135  0.00  0.00            
ATOM    988  OW  HOH X 306      18.013  10.947  23.603  0.00  0.00            
ATOM    989  HW1 HOH X 306      17.442  10.180  23.637  0.00  0.00            
ATOM    990  HW2 HOH X 306      17.413  11.690  23.532  0.00  0.00            
ATOM    991  OW  HOH X 307      46.299  17.076  17.414  0.00  0.00            
ATOM    992  HW1 HOH X 307      46.028  16.535  18.155  0.00  0.00            
ATOM    993  HW2 HOH X 307      45.776  17.874  17.496  0.00  0.00            
ATOM    994  OW  HOH X 308      33.297   7.245   3.513  0.00  0.00            
ATOM    995  HW1 HOH X 308      33.104   6.380   3.151  0.00  0.00            
ATOM    996  HW2 HOH X 308      34.064   7.106   4.069  0.00  0.00            
ATOM    997  OW  HOH X 309      36.309  18.635  31.979  0.00  0.00            
ATOM    998  HW1 HOH X 309      35.977  19.186  31.270  0.00  0.00            
ATOM    999  HW2 HOH X 309      37.133  18.283  31.643  0.00  0.00            
ATOM   1000  OW  HOH X 310      44.990  -3.517  30.223  0.00  0.00            
ATOM   1001  HW1 HOH X 310      44.743  -3.785  29.338  0.00  0.00            
ATOM   1002  HW2 HOH X 310      44.676  -4.225  30.786  0.00  0.00            
ATOM   1003  OW  HOH X 311       7.941  -2.266  17.579  0.00  0.00            
ATOM   1004  HW1 HOH X 311       7.242  -2.832  17.907  0.00  0.00            
ATOM   1005  HW2 HOH X 311       7.914  -1.498  18.149  0.00  0.00            
ATOM   1006  OW  HOH X 312      18.410  22.402  15.886  0.00  0.00            
ATOM   1007  HW1 HOH X 312      18.172  22.000  15.050  0.00  0.00            
ATOM   1008  HW2 HOH X 312      17.642  22.917  16.132  0.00  0.00            
ATOM   1009  OW  HOH X 313      45.164   4.548  29.193  0.00  0.00            
ATOM   1010  HW1 HOH X 313      45.902   4.097  28.784  0.00  0.00            
ATOM   1011  HW2 HOH X 313      45.340   4.494  30.132  0.00  0.00            
ATOM   1012  OW  HOH X 314      20.157  20.098  20.999  0.00  0.00            
ATOM   1013  HW1 HOH X 314      19.439  20.471  20.487  0.00  0.00            
ATOM   1014  HW2 HOH X 314      20.063  20.492  21.866  0.00  0.00            
ATOM   1015  OW  HOH X 315      17.134  21.468  11.049  0.00  0.00            
ATOM   1016  HW1 HOH X 315      17.505  20.649  10.719  0.00  0.00            
ATOM   1017  HW2 HOH X 315      16.204  21.416  10.829  0.00  0.00            
ATOM   1018  OW  HOH X 316      39.688   2.725  30.344  0.00  0.00            
ATOM   1019  HW1 HOH X 316      39.825   2.396  31.232  0.00  0.00            
ATOM   1020  HW2 HOH X 316      40.274   3.478  30.274  0.00  0.00            
ATOM   1021  OW  HOH X 317      43.881   9.879  18.417  0.00  0.00            
ATOM   1022  HW1 HOH X 317      44.268  10.597  17.915  0.00  0.00            
ATOM   1023  HW2 HOH X 317      42.999  10.182  18.629  0.00  0.00            
ATOM   1024  OW  HOH X 318      18.492   3.692   5.107  0.00  0.00            
ATOM   1025  HW1 HOH X 318      17.814   3.102   5.435  0.00  0.00            
ATOM   1026  HW2 HOH X 318      18.962   3.176   4.451  0.00  0.00            
ATOM   1027  OW  HOH X 319      27.623   2.656  25.396  0.00  0.00            
ATOM   1028  HW1 HOH X 319      27.038   2.425  26.117  0.00  0.00            
ATOM   1029  HW2 HOH X 319      27.218   3.426  24.996  0.00  0.00            
ATOM   1030  OW  HOH X 320      38.304  13.070  23.015  0.00  0.00            
ATOM   1031  HW1 HOH X 320      37.826  13.539  23.699  0.00  0.00            
ATOM   1032  HW2 HOH X 320      38.594  12.261  23.436  0.00  0.00            
ATOM   1033  OW  HOH X 321      22.147   3.762  -1.530  0.00  0.00            
ATOM   1034  HW1 HOH X 321      22.240   4.045  -2.439  0.00  0.00            
ATOM   1035  HW2 HOH X 321      23.023   3.860  -1.157  0.00  0.00            
ATOM   1036  OW  HOH X 322      19.217   8.672  38.264  0.00  0.00            
ATOM   1037  HW1 HOH X 322      19.770   7.960  38.586  0.00  0.00            
ATOM   1038  HW2 HOH X 322      19.665   9.470  38.547  0.00  0.00            
ATOM   1039  OW  HOH X 323      13.029   6.146  27.548  0.00  0.00            
ATOM   1040  HW1 HOH X 323      12.892   5.198  27.573  0.00  0.00            
ATOM   1041  HW2 HOH X 323      12.285   6.482  27.049  0.00  0.00            
ATOM   1042  OW  HOH X 324      21.029  -5.561  11.556  0.00  0.00            
ATOM   1043  HW1 HOH X 324      20.747  -6.473  11.620  0.00  0.00            
ATOM   1044  HW2 HOH X 324      20.361  -5.068  12.031  0.00  0.00            
ATOM   1045  OW  HOH X 325      31.434  13.627  20.358  0.00  0.00            
ATOM   1046  HW1 HOH X 325      31.349  13.641  19.404  0.00  0.00            
ATOM   1047  HW2 HOH X 325      30.757  13.017  20.650  0.00  0.00            
ATOM   1048  OW  HOH X 326      37.648  -2.799  17.999  0.00  0.00            
ATOM   1049  HW1 HOH X 326      37.286  -1.923  17.865  0.00  0.00            
ATOM   1050  HW2 HOH X 326      36.959  -3.274  18.463  0.00  0.00            
ATOM   1051  OW  HOH X 327      18.856   0.273  13.259  0.00  0.00            
ATOM   1052  HW1 HOH X 327      17.989   0.557  13.547  0.00  0.00            
ATOM   1053  HW2 HOH X 327      19.443   0.977  13.534  0.00  0.00            
ATOM   1054  OW  HOH X 328      18.679  12.347  20.423  0.00  0.00            
ATOM   1055  HW1 HOH X 328      18.394  11.640  21.002  0.00  0.00            
ATOM   1056  HW2 HOH X 328      19.469  12.693  20.839  0.00  0.00            
ATOM   1057  OW  HOH X 329      13.700   5.912  23.015  0.00  0.00            
ATOM   1058  HW1 HOH X 329      13.352   5.045  23.224  0.00  0.00            
ATOM   1059  HW2 HOH X 329      14.484   5.994  23.558  0.00  0.00            
ATOM   1060  OW  HOH X 330      21.088  10.086  34.261  0.00  0.00            
ATOM   1061  HW1 HOH X 330      21.819   9.764  34.789  0.00  0.00            
ATOM   1062  HW2 HOH X 330      21.196   9.655  33.414  0.00  0.00            
ATOM   1063  OW  HOH X 331      24.994   1.774  26.690  0.00  0.00            
ATOM   1064  HW1 HOH X 331      24.472   2.409  26.200  0.00  0.00            
ATOM   1065  HW2 HOH X 331      24.351   1.258  27.175  0.00  0.00            
ATOM   1066  OW  HOH X 332      12.877  19.610  20.882  0.00  0.00            
ATOM   1067  HW1 HOH X 332      12.453  18.883  20.427  0.00  0.00            
ATOM   1068  HW2 HOH X 332      13.273  19.210  21.657  0.00  0.00            
ATOM   1069  OW  HOH X 333      11.082   6.910  23.557  0.00  0.00            
ATOM   1070  HW1 HOH X 333      10.730   7.718  23.185  0.00  0.00            
ATOM   1071  HW2 HOH X 333      11.904   6.767  23.087  0.00  0.00            
ATOM   1072  OW  HOH X 334      14.633   9.578  10.570  0.00  0.00            
ATOM   1073  HW1 HOH X 334      14.462   8.898   9.918  0.00  0.00            
ATOM   1074  HW2 HOH X 334      13.991   9.414  11.261  0.00  0.00            
ATOM   1075  OW  HOH X 335      30.851  22.450  20.529  0.00  0.00            
ATOM   1076  HW1 HOH X 335      30.761  22.709  19.611  0.00  0.00            
ATOM   1077  HW2 HOH X 335      30.194  21.765  20.650  0.00  0.00            
ATOM   1078  OW  HOH X 336      40.735  26.104  24.777  0.00  0.00            
ATOM   1079  HW1 HOH X 336      41.548  26.385  25.197  0.00  0.00            
ATOM   1080  HW2 HOH X 336      40.897  26.216  23.840  0.00  0.00            
ATOM   1081  OW  HOH X 337      34.164  -0.798  28.935  0.00  0.00            
ATOM   1082  HW1 HOH X 337      34.624   0.036  29.034  0.00  0.00            
ATOM   1083  HW2 HOH X 337      33.525  -0.638  28.241  0.00  0.00            
ATOM   1084  OW  HOH X 338      24.425   3.877  22.646  0.00  0.00            
ATOM   1085  HW1 HOH X 338      23.730   3.566  23.226  0.00  0.00            
ATOM   1086  HW2 HOH X 338      24.065   4.666  22.241  0.00  0.00            
ATOM   1087  OW  HOH X 339      43.336  -7.335  26.857  0.00  0.00            
ATOM   1088  HW1 HOH X 339      44.127  -7.482  26.337  0.00  0.00            
ATOM   1089  HW2 HOH X 339      43.081  -8.208  27.157  0.00  0.00            
ATOM   1090  OW  HOH X 340      33.516  13.651  22.421  0.00  0.00            
ATOM   1091  HW1 HOH X 340      32.672  13.765  21.985  0.00  0.00            
ATOM   1092  HW2 HOH X 340      33.330  13.804  23.347  0.00  0.00            
ATOM   1093  OW  HOH X 341      12.184   3.069  24.305  0.00  0.00            
ATOM   1094  HW1 HOH X 341      13.004   2.615  24.500  0.00  0.00            
ATOM   1095  HW2 HOH X 341      11.733   2.494  23.687  0.00  0.00            
ATOM   1096  OW  HOH X 342      23.652  -6.602  14.236  0.00  0.00            
ATOM   1097  HW1 HOH X 342      24.385  -6.165  14.670  0.00  0.00            
ATOM   1098  HW2 HOH X 342      23.548  -7.426  14.712  0.00  0.00            
ATOM   1099  OW  HOH X 343      35.098  17.471  17.880  0.00  0.00            
ATOM   1100  HW1 HOH X 343      35.512  18.331  17.808  0.00  0.00            
ATOM   1101  HW2 HOH X 343      34.986  17.336  18.821  0.00  0.00            
ATOM   1102  OW  HOH X 344      39.781  13.004  32.522  0.00  0.00            
ATOM   1103  HW1 HOH X 344      40.677  13.333  32.451  0.00  0.00            
ATOM   1104  HW2 HOH X 344      39.458  12.989  31.621  0.00  0.00            
ATOM   1105  OW  HOH X 345      29.267  24.027  25.539  0.00  0.00            
ATOM   1106  HW1 HOH X 345      30.142  24.249  25.218  0.00  0.00            
ATOM   1107  HW2 HOH X 345      29.002  23.275  25.009  0.00  0.00            
ATOM   1108  OW  HOH X 346      32.275   5.251  12.898  0.00  0.00            
ATOM   1109  HW1 HOH X 346      32.836   5.153  13.667  0.00  0.00            
ATOM   1110  HW2 HOH X 346      32.207   6.197  12.770  0.00  0.00            
ATOM   1111  OW  HOH X 347      19.235  11.566  11.199  0.00  0.00            
ATOM   1112  HW1 HOH X 347      19.417  12.506  11.202  0.00  0.00            
ATOM   1113  HW2 HOH X 347      18.567  11.454  10.522  0.00  0.00            
ATOM   1114  OW  HOH X 348      25.905   9.899  -2.595  0.00  0.00            
ATOM   1115  HW1 HOH X 348      26.428   9.443  -1.936  0.00  0.00            
ATOM   1116  HW2 HOH X 348      25.211  10.329  -2.094  0.00  0.00            
ATOM   1117  OW  HOH X 349      22.918  -8.805  15.611  0.00  0.00            
ATOM   1118  HW1 HOH X 349      22.141  -8.719  16.163  0.00  0.00            
ATOM   1119  HW2 HOH X 349      23.625  -9.014  16.222  0.00  0.00            
ATOM   1120  OW  HOH X 350      43.878   8.177  13.807  0.00  0.00            
ATOM   1121  HW1 HOH X 350      44.306   8.704  14.481  0.00  0.00            
ATOM   1122  HW2 HOH X 350      44.414   7.387  13.743  0.00  0.00            
ATOM   1123  OW  HOH X 351      36.751   4.949  39.268  0.00  0.00            
ATOM   1124  HW1 HOH X 351      37.012   4.294  38.620  0.00  0.00            
ATOM   1125  HW2 HOH X 351      36.054   4.525  39.769  0.00  0.00            
ATOM   1126  OW  HOH X 352      36.663  19.477  25.084  0.00  0.00            
ATOM   1127  HW1 HOH X 352      35.732  19.689  25.152  0.00  0.00            
ATOM   1128  HW2 HOH X 352      37.111  20.292  25.311  0.00  0.00            
ATOM   1129  OW  HOH X 353      32.257   0.504  10.162  0.00  0.00            
ATOM   1130  HW1 HOH X 353      32.729   0.016  10.837  0.00  0.00            
ATOM   1131  HW2 HOH X 353      32.602   1.394  10.223  0.00  0.00            
ATOM   1132  OW  HOH X 354      24.368   0.440   7.983  0.00  0.00            
ATOM   1133  HW1 HOH X 354      25.302   0.296   8.130  0.00  0.00            
ATOM   1134  HW2 HOH X 354      23.939   0.014   8.725  0.00  0.00            
ATOM   1135  OW  HOH X 355      36.767   4.183   8.854  0.00  0.00            
ATOM   1136  HW1 HOH X 355      36.640   4.861   9.518  0.00  0.00            
ATOM   1137  HW2 HOH X 355      37.511   4.491   8.337  0.00  0.00            
ATOM   1138  OW  HOH X 356      46.383  19.732  23.439  0.00  0.00            
ATOM   1139  HW1 HOH X 356      46.831  18.888  23.381  0.00  0.00            
ATOM   1140  HW2 HOH X 356      46.351  20.049  22.536  0.00  0.00            
ATOM   1141  OW  HOH X 357      47.133  11.623  11.952  0.00  0.00            
ATOM   1142  HW1 HOH X 357      47.246  12.352  12.562  0.00  0.00            
ATOM   1143  HW2 HOH X 357      47.988  11.527  11.531  0.00  0.00            
ATOM   1144  OW  HOH X 358      39.310  27.189  28.436  0.00  0.00            
ATOM   1145  HW1 HOH X 358      39.520  26.565  29.130  0.00  0.00            
ATOM   1146  HW2 HOH X 358      38.398  27.003  28.214  0.00  0.00            
ATOM   1147  OW  HOH X 359      23.904   8.467  25.112  0.00  0.00            
ATOM   1148  HW1 HOH X 359      23.928   7.590  25.494  0.00  0.00            
ATOM   1149  HW2 HOH X 359      24.336   8.370  24.263  0.00  0.00            
ATOM   1150  OW  HOH X 360      23.401  18.449  16.259  0.00  0.00            
ATOM   1151  HW1 HOH X 360      22.917  17.919  16.892  0.00  0.00            
ATOM   1152  HW2 HOH X 360      22.957  19.297  16.266  0.00  0.00            
ATOM   1153  OW  HOH X 361      37.664   9.086   7.954  0.00  0.00            
ATOM   1154  HW1 HOH X 361      37.165   9.866   8.196  0.00  0.00            
ATOM   1155  HW2 HOH X 361      37.298   8.389   8.497  0.00  0.00            
ATOM   1156  OW  HOH X 362      29.480   8.712  34.541  0.00  0.00            
ATOM   1157  HW1 HOH X 362      29.013   7.894  34.712  0.00  0.00            
ATOM   1158  HW2 HOH X 362      29.048   9.357  35.101  0.00  0.00            
ATOM   1159  OW  HOH X 363      34.820   5.332  28.848  0.00  0.00            
ATOM   1160  HW1 HOH X 363      34.496   5.987  29.466  0.00  0.00            
ATOM   1161  HW2 HOH X 363      35.001   4.562  29.388  0.00  0.00            
ATOM   1162  OW  HOH X 364      40.192  25.285  33.934  0.00  0.00            
ATOM   1163  HW1 HOH X 364      40.991  25.445  34.437  0.00  0.00            
ATOM   1164  HW2 HOH X 364      40.330  25.751  33.110  0.00  0.00            
ATOM   1165  OW  HOH X 365      18.560   1.623   8.387  0.00  0.00            
ATOM   1166  HW1 HOH X 365      18.841   1.746   9.294  0.00  0.00            
ATOM   1167  HW2 HOH X 365      19.137   2.192   7.878  0.00  0.00            
ATOM   1168  OW  HOH X 366      33.392  24.137  19.687  0.00  0.00            
ATOM   1169  HW1 HOH X 366      33.921  23.385  19.421  0.00  0.00            
ATOM   1170  HW2 HOH X 366      33.979  24.662  20.231  0.00  0.00            
ATOM   1171  OW  HOH X 367      47.839   7.723  17.324  0.00  0.00            
ATOM   1172  HW1 HOH X 367      46.941   7.534  17.597  0.00  0.00            
ATOM   1173  HW2 HOH X 367      48.385   7.255  17.955  0.00  0.00            
ATOM   1174  OW  HOH X 368      18.584  19.314   6.968  0.00  0.00            
ATOM   1175  HW1 HOH X 368      18.146  19.257   6.119  0.00  0.00            
ATOM   1176  HW2 HOH X 368      19.411  18.847   6.843  0.00  0.00            
ATOM   1177  OW  HOH X 369      16.119   8.198   7.784  0.00  0.00            
ATOM   1178  HW1 HOH X 369      15.988   8.896   7.141  0.00  0.00            
ATOM   1179  HW2 HOH X 369      17.051   8.244   8.000  0.00  0.00            
ATOM   1180  OW  HOH X 370      20.637  19.918  11.361  0.00  0.00            
ATOM   1181  HW1 HOH X 370      20.699  20.799  10.990  0.00  0.00            
ATOM   1182  HW2 HOH X 370      21.478  19.511  11.154  0.00  0.00            
ATOM   1183  OW  HOH X 371      35.581  27.718  30.328  0.00  0.00            
ATOM   1184  HW1 HOH X 371      35.180  28.237  31.025  0.00  0.00            
ATOM   1185  HW2 HOH X 371      34.918  27.687  29.639  0.00  0.00            
ATOM   1186  OW  HOH X 372      41.568  14.409  17.263  0.00  0.00            
ATOM   1187  HW1 HOH X 372      41.497  15.051  17.969  0.00  0.00            
ATOM   1188  HW2 HOH X 372      41.321  14.892  16.474  0.00  0.00            
ATOM   1189  OW  HOH X 373      26.254  24.057  13.809  0.00  0.00            
ATOM   1190  HW1 HOH X 373      26.670  24.865  13.508  0.00  0.00            
ATOM   1191  HW2 HOH X 373      25.682  24.335  14.525  0.00  0.00            
ATOM   1192  OW  HOH X 374      38.038  14.030  14.665  0.00  0.00            
ATOM   1193  HW1 HOH X 374      37.816  14.347  15.541  0.00  0.00            
ATOM   1194  HW2 HOH X 374      37.595  14.635  14.071  0.00  0.00            
ATOM   1195  OW  HOH X 375      25.362  -3.231  24.643  0.00  0.00            
ATOM   1196  HW1 HOH X 375      24.557  -2.898  25.039  0.00  0.00            
ATOM   1197  HW2 HOH X 375      25.756  -2.469  24.220  0.00  0.00            
ATOM   1198  OW  HOH X 376      18.169  -0.640  24.956  0.00  0.00            
ATOM   1199  HW1 HOH X 376      18.225  -0.138  25.768  0.00  0.00            
ATOM   1200  HW2 HOH X 376      18.556  -1.489  25.171  0.00  0.00            
ATOM   1201  OW  HOH X 377      41.594  17.764  24.422  0.00  0.00            
ATOM   1202  HW1 HOH X 377      40.991  18.065  23.742  0.00  0.00            
ATOM   1203  HW2 HOH X 377      42.345  18.354  24.354  0.00  0.00            
ATOM   1204  OW  HOH X 378      44.835  26.459  29.882  0.00  0.00            
ATOM   1205  HW1 HOH X 378      45.706  26.563  29.499  0.00  0.00            
ATOM   1206  HW2 HOH X 378      44.633  25.530  29.771  0.00  0.00            
ATOM   1207  OW  HOH X 379      21.723   1.074  25.460  0.00  0.00            
ATOM   1208  HW1 HOH X 379      21.386   0.812  24.603  0.00  0.00            
ATOM   1209  HW2 HOH X 379      21.599   0.303  26.013  0.00  0.00            
ATOM   1210  OW  HOH X 380      42.059  -4.202  30.106  0.00  0.00            
ATOM   1211  HW1 HOH X 380      41.203  -3.840  29.874  0.00  0.00            
ATOM   1212  HW2 HOH X 380      42.503  -4.321  29.267  0.00  0.00            
ATOM   1213  OW  HOH X 381      31.780   3.832  30.629  0.00  0.00            
ATOM   1214  HW1 HOH X 381      31.418   3.165  31.213  0.00  0.00            
ATOM   1215  HW2 HOH X 381      31.176   4.570  30.703  0.00  0.00            
ATOM   1216  OW  HOH X 382      16.267  18.521  14.367  0.00  0.00            
ATOM   1217  HW1 HOH X 382      15.823  18.291  15.183  0.00  0.00            
ATOM   1218  HW2 HOH X 382      16.831  17.770  14.181  0.00  0.00            
ATOM   1219  OW  HOH X 383      31.246  -8.082  23.428  0.00  0.00            
ATOM   1220  HW1 HOH X 383      32.191  -8.200  23.523  0.00  0.00            
ATOM   1221  HW2 HOH X 383      30.867  -8.594  24.143  0.00  0.00            
ATOM   1222  OW  HOH X 384      52.470  11.051  18.272  0.00  0.00            
ATOM   1223  HW1 HOH X 384      52.794  10.177  18.053  0.00  0.00            
ATOM   1224  HW2 HOH X 384      51.674  11.149  17.750  0.00  0.00            
ATOM   1225  OW  HOH X 385      38.729  17.732  18.522  0.00  0.00            
ATOM   1226  HW1 HOH X 385      38.375  17.358  19.329  0.00  0.00            
ATOM   1227  HW2 HOH X 385      39.645  17.453  18.511  0.00  0.00            
ATOM   1228  OW  HOH X 386       8.894   4.724  26.855  0.00  0.00            
ATOM   1229  HW1 HOH X 386       8.296   4.825  26.114  0.00  0.00            
ATOM   1230  HW2 HOH X 386       8.370   4.295  27.531  0.00  0.00            
ATOM   1231  OW  HOH X 387      14.994   5.703  11.006  0.00  0.00            
ATOM   1232  HW1 HOH X 387      15.274   6.522  11.416  0.00  0.00            
ATOM   1233  HW2 HOH X 387      14.398   5.975  10.308  0.00  0.00            
ATOM   1234  OW  HOH X 388      18.986  -4.382  13.157  0.00  0.00            
ATOM   1235  HW1 HOH X 388      18.623  -4.215  14.026  0.00  0.00            
ATOM   1236  HW2 HOH X 388      18.872  -3.557  12.686  0.00  0.00            
ATOM   1237  OW  HOH X 389      34.011  27.362  27.844  0.00  0.00            
ATOM   1238  HW1 HOH X 389      33.437  27.426  28.607  0.00  0.00            
ATOM   1239  HW2 HOH X 389      33.807  28.139  27.323  0.00  0.00            
ATOM   1240  OW  HOH X 390      28.550   3.217  29.613  0.00  0.00            
ATOM   1241  HW1 HOH X 390      29.153   2.914  30.292  0.00  0.00            
ATOM   1242  HW2 HOH X 390      28.225   2.414  29.205  0.00  0.00            
ATOM   1243  OW  HOH X 391      17.459  -1.954   4.505  0.00  0.00            
ATOM   1244  HW1 HOH X 391      17.711  -1.515   3.692  0.00  0.00            
ATOM   1245  HW2 HOH X 391      16.679  -2.457   4.274  0.00  0.00            
ATOM   1246  OW  HOH X 392      15.627  12.382  18.249  0.00  0.00            
ATOM   1247  HW1 HOH X 392      16.403  12.897  18.027  0.00  0.00            
ATOM   1248  HW2 HOH X 392      15.048  12.483  17.494  0.00  0.00            
ATOM   1249  OW  HOH X 393      33.207  19.907  20.588  0.00  0.00            
ATOM   1250  HW1 HOH X 393      33.614  20.563  20.022  0.00  0.00            
ATOM   1251  HW2 HOH X 393      32.398  19.668  20.135  0.00  0.00            
ATOM   1252  OW  HOH X 394      46.166  13.529  24.067  0.00  0.00            
ATOM   1253  HW1 HOH X 394      46.234  13.102  24.921  0.00  0.00            
ATOM   1254  HW2 HOH X 394      47.042  13.880  23.904  0.00  0.00            
ATOM   1255  OW  HOH X 395      37.593   4.199  36.514  0.00  0.00            
ATOM   1256  HW1 HOH X 395      37.961   5.075  36.626  0.00  0.00            
ATOM   1257  HW2 HOH X 395      38.305   3.687  36.131  0.00  0.00            
ATOM   1258  OW  HOH X 396      44.087  18.669  24.818  0.00  0.00            
ATOM   1259  HW1 HOH X 396      44.811  19.088  24.353  0.00  0.00            
ATOM   1260  HW2 HOH X 396      44.297  17.735  24.796  0.00  0.00            
ATOM   1261  OW  HOH X 397      33.131   4.893   5.800  0.00  0.00            
ATOM   1262  HW1 HOH X 397      33.382   5.737   6.177  0.00  0.00            
ATOM   1263  HW2 HOH X 397      32.835   4.375   6.548  0.00  0.00            
ATOM   1264  OW  HOH X 398      47.367   3.444  24.884  0.00  0.00            
ATOM   1265  HW1 HOH X 398      47.597   4.040  24.171  0.00  0.00            
ATOM   1266  HW2 HOH X 398      47.531   2.570  24.529  0.00  0.00            
ATOM   1267  OW  HOH X 399      54.615   9.152  17.833  0.00  0.00            
ATOM   1268  HW1 HOH X 399      55.265   8.662  17.330  0.00  0.00            
ATOM   1269  HW2 HOH X 399      54.612   8.733  18.694  0.00  0.00            
ATOM   1270  OW  HOH X 400      34.913  21.119  36.550  0.00  0.00            
ATOM   1271  HW1 HOH X 400      35.452  20.701  35.879  0.00  0.00            
ATOM   1272  HW2 HOH X 400      34.078  20.653  36.512  0.00  0.00            
ATOM   1273  OW  HOH X 401      16.606   1.769  10.865  0.00  0.00            
ATOM   1274  HW1 HOH X 401      16.444   0.852  10.645  0.00  0.00            
ATOM   1275  HW2 HOH X 401      16.552   2.230  10.028  0.00  0.00            
ATOM   1276  OW  HOH X 402       8.325   7.768  27.621  0.00  0.00            
ATOM   1277  HW1 HOH X 402       8.096   8.567  28.096  0.00  0.00            
ATOM   1278  HW2 HOH X 402       9.143   7.981  27.173  0.00  0.00            
ATOM   1279  OW  HOH X 403      29.778  -3.739  29.511  0.00  0.00            
ATOM   1280  HW1 HOH X 403      30.059  -4.615  29.247  0.00  0.00            
ATOM   1281  HW2 HOH X 403      29.636  -3.273  28.687  0.00  0.00            
ATOM   1282  OW  HOH X 404      23.003   4.286  30.287  0.00  0.00            
ATOM   1283  HW1 HOH X 404      22.425   4.461  29.544  0.00  0.00            
ATOM   1284  HW2 HOH X 404      22.424   4.300  31.050  0.00  0.00            
ATOM   1285  OW  HOH X 405      20.158  10.573  25.343  0.00  0.00            
ATOM   1286  HW1 HOH X 405      20.124   9.725  24.901  0.00  0.00            
ATOM   1287  HW2 HOH X 405      19.358  11.020  25.068  0.00  0.00            
ATOM   1288  OW  HOH X 406      41.740   6.367  19.121  0.00  0.00            
ATOM   1289  HW1 HOH X 406      41.496   6.620  18.230  0.00  0.00            
ATOM   1290  HW2 HOH X 406      42.368   5.655  19.005  0.00  0.00            
ATOM   1291  OW  HOH X 407      24.251   5.133  34.134  0.00  0.00            
ATOM   1292  HW1 HOH X 407      23.634   4.746  33.511  0.00  0.00            
ATOM   1293  HW2 HOH X 407      23.766   5.172  34.958  0.00  0.00            
ATOM   1294  OW  HOH X 408       7.603   6.519  20.512  0.00  0.00            
ATOM   1295  HW1 HOH X 408       8.378   5.978  20.665  0.00  0.00            
ATOM   1296  HW2 HOH X 408       7.579   6.640  19.563  0.00  0.00            
ATOM   1297  OW  HOH X 409      22.837  -2.342  25.470  0.00  0.00            
ATOM   1298  HW1 HOH X 409      21.938  -2.576  25.700  0.00  0.00            
ATOM   1299  HW2 HOH X 409      23.184  -1.921  26.257  0.00  0.00            
ATOM   1300  OW  HOH X 410      40.121   2.526  27.604  0.00  0.00            
ATOM   1301  HW1 HOH X 410      40.230   2.377  28.543  0.00  0.00            
ATOM   1302  HW2 HOH X 410      39.310   2.070  27.381  0.00  0.00            
ATOM   1303  OW  HOH X 411       9.323   9.882  29.227  0.00  0.00            
ATOM   1304  HW1 HOH X 411      10.000  10.061  29.880  0.00  0.00            
ATOM   1305  HW2 HOH X 411       9.769   9.981  28.386  0.00  0.00            
ATOM   1306  OW  HOH X 412      47.526  -2.375  26.541  0.00  0.00            
ATOM   1307  HW1 HOH X 412      46.808  -1.812  26.251  0.00  0.00            
ATOM   1308  HW2 HOH X 412      47.577  -3.060  25.875  0.00  0.00            
ATOM   1309  OW  HOH X 413      33.836  -8.149  24.613  0.00  0.00            
ATOM   1310  HW1 HOH X 413      33.552  -8.576  25.421  0.00  0.00            
ATOM   1311  HW2 HOH X 413      34.256  -8.845  24.108  0.00  0.00            
ATOM   1312  OW  HOH X 414       9.932  12.315  18.996  0.00  0.00            
ATOM   1313  HW1 HOH X 414       9.970  12.990  19.673  0.00  0.00            
ATOM   1314  HW2 HOH X 414       9.483  12.736  18.262  0.00  0.00            
ATOM   1315  OW  HOH X 415      12.217   5.316  17.165  0.00  0.00            
ATOM   1316  HW1 HOH X 415      12.354   5.646  16.277  0.00  0.00            
ATOM   1317  HW2 HOH X 415      11.753   6.022  17.614  0.00  0.00            
ATOM   1318  OW  HOH X 416      36.561  -1.775  36.789  0.00  0.00            
ATOM   1319  HW1 HOH X 416      36.819  -1.203  37.511  0.00  0.00            
ATOM   1320  HW2 HOH X 416      37.251  -1.662  36.135  0.00  0.00            
ATOM   1321  OW  HOH X 417      19.707   9.693  19.902  0.00  0.00            
ATOM   1322  HW1 HOH X 417      19.773   9.408  18.990  0.00  0.00            
ATOM   1323  HW2 HOH X 417      19.863  10.636  19.870  0.00  0.00            
ATOM   1324  OW  HOH X 418      14.133   3.823   9.334  0.00  0.00            
ATOM   1325  HW1 HOH X 418      15.011   3.862   8.955  0.00  0.00            
ATOM   1326  HW2 HOH X 418      14.215   4.270  10.177  0.00  0.00            
ATOM   1327  OW  HOH X 419      35.189   8.960  40.943  0.00  0.00            
ATOM   1328  HW1 HOH X 419      34.740   9.142  40.118  0.00  0.00            
ATOM   1329  HW2 HOH X 419      35.976   8.479  40.687  0.00  0.00            
ATOM   1330  OW  HOH X 420      35.027  23.282  25.226  0.00  0.00            
ATOM   1331  HW1 HOH X 420      34.244  23.633  25.650  0.00  0.00            
ATOM   1332  HW2 HOH X 420      35.713  23.356  25.889  0.00  0.00            
ATOM   1333  OW  HOH X 421      15.493   6.075  32.306  0.00  0.00            
ATOM   1334  HW1 HOH X 421      14.611   6.201  32.656  0.00  0.00            
ATOM   1335  HW2 HOH X 421      15.389   6.153  31.358  0.00  0.00            
ATOM   1336  OW  HOH X 422      16.507   1.323  26.813  0.00  0.00            
ATOM   1337  HW1 HOH X 422      15.859   1.413  26.114  0.00  0.00            
ATOM   1338  HW2 HOH X 422      16.166   1.864  27.527  0.00  0.00            
ATOM   1339  OW  HOH X 423      13.326  12.070  22.477  0.00  0.00            
ATOM   1340  HW1 HOH X 423      13.266  11.180  22.825  0.00  0.00            
ATOM   1341  HW2 HOH X 423      14.145  12.080  21.982  0.00  0.00            
ATOM   1342  OW  HOH X 424      43.633   3.293  14.160  0.00  0.00            
ATOM   1343  HW1 HOH X 424      43.870   2.605  14.782  0.00  0.00            
ATOM   1344  HW2 HOH X 424      42.996   2.879  13.577  0.00  0.00            
ATOM   1345  OW  HOH X 425      45.276   0.328  27.696  0.00  0.00            
ATOM   1346  HW1 HOH X 425      44.553   0.013  27.153  0.00  0.00            
ATOM   1347  HW2 HOH X 425      45.045   0.056  28.584  0.00  0.00            
ATOM   1348  OW  HOH X 426      48.961  10.826  20.254  0.00  0.00            
ATOM   1349  HW1 HOH X 426      48.397  11.239  19.599  0.00  0.00            
ATOM   1350  HW2 HOH X 426      48.576  11.076  21.094  0.00  0.00            
ATOM   1351  OW  HOH X 427      35.513   6.340  10.607  0.00  0.00            
ATOM   1352  HW1 HOH X 427      34.764   6.663  11.110  0.00  0.00            
ATOM   1353  HW2 HOH X 427      36.234   6.323  11.236  0.00  0.00            
ATOM   1354  OW  HOH X 428      30.290  -9.696  20.165  0.00  0.00            
ATOM   1355  HW1 HOH X 428      29.903 -10.245  20.848  0.00  0.00            
ATOM   1356  HW2 HOH X 428      31.085 -10.162  19.905  0.00  0.00            
ATOM   1357  OW  HOH X 429      34.711   9.344  43.922  0.00  0.00            
ATOM   1358  HW1 HOH X 429      35.602   9.369  44.271  0.00  0.00            
ATOM   1359  HW2 HOH X 429      34.824   9.182  42.986  0.00  0.00            
ATOM   1360  OW  HOH X 430      36.794  12.168  37.883  0.00  0.00            
ATOM   1361  HW1 HOH X 430      35.992  11.782  37.530  0.00  0.00            
ATOM   1362  HW2 HOH X 430      37.483  11.547  37.647  0.00  0.00            
ATOM   1363  OW  HOH X 431      28.266   8.312  31.844  0.00  0.00            
ATOM   1364  HW1 HOH X 431      28.656   8.751  32.600  0.00  0.00            
ATOM   1365  HW2 HOH X 431      27.492   7.871  32.195  0.00  0.00            
ATOM   1366  OW  HOH X 432      12.015  29.044  11.369  0.00  0.00            
ATOM   1367  HW1 HOH X 432      11.909  28.402  10.667  0.00  0.00            
ATOM   1368  HW2 HOH X 432      12.271  28.526  12.132  0.00  0.00            
ATOM   1369  OW  HOH X 433      27.040   5.045  15.490  0.00  0.00            
ATOM   1370  HW1 HOH X 433      26.864   5.543  16.289  0.00  0.00            
ATOM   1371  HW2 HOH X 433      27.601   5.620  14.969  0.00  0.00            
ATOM   1372  OW  HOH X 434      31.080  14.650  11.791  0.00  0.00            
ATOM   1373  HW1 HOH X 434      31.711  14.562  11.077  0.00  0.00            
ATOM   1374  HW2 HOH X 434      30.368  15.171  11.418  0.00  0.00            
ATOM   1375  OW  HOH X 435      36.173  11.241  17.022  0.00  0.00            
ATOM   1376  HW1 HOH X 435      35.512  11.388  16.345  0.00  0.00            
ATOM   1377  HW2 HOH X 435      36.776  11.979  16.934  0.00  0.00            
ATOM   1378  OW  HOH X 436      43.320  17.396  20.910  0.00  0.00            
ATOM   1379  HW1 HOH X 436      43.974  18.091  20.826  0.00  0.00            
ATOM   1380  HW2 HOH X 436      43.627  16.867  21.646  0.00  0.00            
ATOM   1381  OW  HOH X 437       8.399  13.461  16.818  0.00  0.00            
ATOM   1382  HW1 HOH X 437       8.413  14.304  17.271  0.00  0.00            
ATOM   1383  HW2 HOH X 437       7.539  13.094  17.020  0.00  0.00            
ATOM   1384  OW  HOH X 438      37.161  14.734  17.401  0.00  0.00            
ATOM   1385  HW1 HOH X 438      37.799  14.486  18.070  0.00  0.00            
ATOM   1386  HW2 HOH X 438      36.311  14.575  17.809  0.00  0.00            
ATOM   1387  OW  HOH X 439      30.366  -5.244  16.253  0.00  0.00            
ATOM   1388  HW1 HOH X 439      30.512  -4.661  16.998  0.00  0.00            
ATOM   1389  HW2 HOH X 439      30.427  -6.125  16.621  0.00  0.00            
ATOM   1390  OW  HOH X 440      14.264  -8.346  13.391  0.00  0.00            
ATOM   1391  HW1 HOH X 440      14.601  -7.454  13.469  0.00  0.00            
ATOM   1392  HW2 HOH X 440      13.337  -8.235  13.179  0.00  0.00            
ATOM   1393  OW  HOH X 441      51.524  11.537  20.849  0.00  0.00            
ATOM   1394  HW1 HOH X 441      51.971  11.299  20.036  0.00  0.00            
ATOM   1395  HW2 HOH X 441      50.639  11.186  20.747  0.00  0.00            
ATOM   1396  OW  HOH X 442      13.143  17.014  18.621  0.00  0.00            
ATOM   1397  HW1 HOH X 442      12.480  16.425  18.260  0.00  0.00            
ATOM   1398  HW2 HOH X 442      13.345  16.649  19.483  0.00  0.00            
ATOM   1399  OW  HOH X 443      33.811  10.853  -0.453  0.00  0.00            
ATOM   1400  HW1 HOH X 443      33.437  11.072  -1.306  0.00  0.00            
ATOM   1401  HW2 HOH X 443      34.210  11.668  -0.149  0.00  0.00            
ATOM   1402  OW  HOH X 444      32.474  -2.567  24.670  0.00  0.00            
ATOM   1403  HW1 HOH X 444      32.668  -3.308  25.244  0.00  0.00            
ATOM   1404  HW2 HOH X 444      33.242  -2.000  24.742  0.00  0.00            
ATOM   1405  OW  HOH X 445      31.424   2.618  20.527  0.00  0.00            
ATOM   1406  HW1 HOH X 445      30.635   2.122  20.743  0.00  0.00            
ATOM   1407  HW2 HOH X 445      31.640   3.090  21.332  0.00  0.00            
ATOM   1408  OW  HOH X 446      24.196   6.037  11.049  0.00  0.00            
ATOM   1409  HW1 HOH X 446      24.283   5.794  11.970  0.00  0.00            
ATOM   1410  HW2 HOH X 446      25.064   5.884  10.676  0.00  0.00            
ATOM   1411  OW  HOH X 447      37.321  16.127  38.641  0.00  0.00            
ATOM   1412  HW1 HOH X 447      37.618  17.010  38.862  0.00  0.00            
ATOM   1413  HW2 HOH X 447      36.398  16.234  38.412  0.00  0.00            
ATOM   1414  OW  HOH X 448      15.395  10.819  27.212  0.00  0.00            
ATOM   1415  HW1 HOH X 448      15.615  11.743  27.330  0.00  0.00            
ATOM   1416  HW2 HOH X 448      14.629  10.681  27.769  0.00  0.00            
ATOM   1417  OW  HOH X 449      44.998   3.337  21.699  0.00  0.00            
ATOM   1418  HW1 HOH X 449      44.131   3.710  21.856  0.00  0.00            
ATOM   1419  HW2 HOH X 449      44.917   2.887  20.858  0.00  0.00            
ATOM   1420  OW  HOH X 450      41.108   8.211  35.177  0.00  0.00            
ATOM   1421  HW1 HOH X 450      41.910   8.088  34.669  0.00  0.00            
ATOM   1422  HW2 HOH X 450      41.393   8.666  35.969  0.00  0.00            
ATOM   1423  OW  HOH X 451      29.288  12.114  21.029  0.00  0.00            
ATOM   1424  HW1 HOH X 451      29.181  11.992  21.972  0.00  0.00            
ATOM   1425  HW2 HOH X 451      28.774  11.409  20.636  0.00  0.00            
ATOM   1426  OW  HOH X 452      13.491  -5.103  10.538  0.00  0.00            
ATOM   1427  HW1 HOH X 452      12.768  -5.719  10.422  0.00  0.00            
ATOM   1428  HW2 HOH X 452      13.639  -4.740   9.664  0.00  0.00            
ATOM   1429  OW  HOH X 453      17.790  20.818  19.842  0.00  0.00            
ATOM   1430  HW1 HOH X 453      17.186  21.003  20.562  0.00  0.00            
ATOM   1431  HW2 HOH X 453      17.522  19.958  19.519  0.00  0.00            
ATOM   1432  OW  HOH X 454      31.972  11.943   3.330  0.00  0.00            
ATOM   1433  HW1 HOH X 454      32.302  11.127   3.707  0.00  0.00            
ATOM   1434  HW2 HOH X 454      32.683  12.571   3.459  0.00  0.00            
ATOM   1435  OW  HOH X 455      38.937  10.534  18.511  0.00  0.00            
ATOM   1436  HW1 HOH X 455      39.375  11.192  17.970  0.00  0.00            
ATOM   1437  HW2 HOH X 455      38.221  10.212  17.964  0.00  0.00            
ATOM   1438  OW  HOH X 456      23.541  18.424   2.474  0.00  0.00            
ATOM   1439  HW1 HOH X 456      22.649  18.492   2.133  0.00  0.00            
ATOM   1440  HW2 HOH X 456      24.019  19.131   2.039  0.00  0.00            
ATOM   1441  OW  HOH X 457      34.152   9.025  14.705  0.00  0.00            
ATOM   1442  HW1 HOH X 457      33.328   8.954  15.188  0.00  0.00            
ATOM   1443  HW2 HOH X 457      34.412   9.940  14.809  0.00  0.00            
ATOM   1444  OW  HOH X 458      46.301  11.790  18.574  0.00  0.00            
ATOM   1445  HW1 HOH X 458      45.873  12.597  18.288  0.00  0.00            
ATOM   1446  HW2 HOH X 458      45.904  11.596  19.423  0.00  0.00            
ATOM   1447  OW  HOH X 459      38.888  23.954  24.858  0.00  0.00            
ATOM   1448  HW1 HOH X 459      39.485  23.251  24.603  0.00  0.00            
ATOM   1449  HW2 HOH X 459      39.373  24.759  24.677  0.00  0.00            
ATOM   1450  OW  HOH X 460      39.738  -7.325  26.169  0.00  0.00            
ATOM   1451  HW1 HOH X 460      39.012  -6.759  26.430  0.00  0.00            
ATOM   1452  HW2 HOH X 460      40.490  -6.993  26.660  0.00  0.00            
ATOM   1453  OW  HOH X 461      47.896   7.124  23.342  0.00  0.00            
ATOM   1454  HW1 HOH X 461      48.780   7.227  22.989  0.00  0.00            
ATOM   1455  HW2 HOH X 461      47.622   6.254  23.051  0.00  0.00            
ATOM   1456  OW  HOH X 462      29.214  12.744  11.545  0.00  0.00            
ATOM   1457  HW1 HOH X 462      28.446  13.050  12.027  0.00  0.00            
ATOM   1458  HW2 HOH X 462      29.831  13.474  11.588  0.00  0.00            
ATOM   1459  OW  HOH X 463      23.178  17.970   5.363  0.00  0.00            
ATOM   1460  HW1 HOH X 463      23.207  18.474   4.550  0.00  0.00            
ATOM   1461  HW2 HOH X 463      23.574  17.128   5.138  0.00  0.00            
ATOM   1462  OW  HOH X 464      33.040  19.931  17.776  0.00  0.00            
ATOM   1463  HW1 HOH X 464      33.514  19.966  16.945  0.00  0.00            
ATOM   1464  HW2 HOH X 464      32.548  19.111  17.737  0.00  0.00            
ATOM   1465  OW  HOH X 465      48.373  17.584  23.320  0.00  0.00            
ATOM   1466  HW1 HOH X 465      48.518  16.716  23.697  0.00  0.00            
ATOM   1467  HW2 HOH X 465      48.591  17.484  22.394  0.00  0.00            
ATOM   1468  OW  HOH X 466      21.956  23.082  23.798  0.00  0.00            
ATOM   1469  HW1 HOH X 466      21.244  23.572  24.208  0.00  0.00            
ATOM   1470  HW2 HOH X 466      22.365  23.708  23.200  0.00  0.00            
ATOM   1471  OW  HOH X 467      39.642  16.625  32.598  0.00  0.00            
ATOM   1472  HW1 HOH X 467      39.115  15.829  32.525  0.00  0.00            
ATOM   1473  HW2 HOH X 467      39.527  16.906  33.506  0.00  0.00            
ATOM   1474  OW  HOH X 468      22.391  -1.682  17.933  0.00  0.00            
ATOM   1475  HW1 HOH X 468      21.454  -1.877  17.936  0.00  0.00            
ATOM   1476  HW2 HOH X 468      22.808  -2.514  17.709  0.00  0.00            
ATOM   1477  OW  HOH X 469       7.422   1.651  21.785  0.00  0.00            
ATOM   1478  HW1 HOH X 469       7.915   1.661  22.605  0.00  0.00            
ATOM   1479  HW2 HOH X 469       6.569   2.020  22.013  0.00  0.00            
ATOM   1480  OW  HOH X 470      21.381  14.478  30.851  0.00  0.00            
ATOM   1481  HW1 HOH X 470      22.204  14.352  30.378  0.00  0.00            
ATOM   1482  HW2 HOH X 470      20.881  13.680  30.679  0.00  0.00            
ATOM   1483  OW  HOH X 471      36.549   7.364  31.941  0.00  0.00            
ATOM   1484  HW1 HOH X 471      37.167   8.094  31.984  0.00  0.00            
ATOM   1485  HW2 HOH X 471      36.693   6.879  32.754  0.00  0.00            
ATOM   1486  OW  HOH X 472      11.189  17.188  21.009  0.00  0.00            
ATOM   1487  HW1 HOH X 472      11.434  17.249  21.933  0.00  0.00            
ATOM   1488  HW2 HOH X 472      10.839  16.302  20.913  0.00  0.00            
ATOM   1489  OW  HOH X 473      30.862  11.407  40.715  0.00  0.00            
ATOM   1490  HW1 HOH X 473      31.792  11.301  40.513  0.00  0.00            
ATOM   1491  HW2 HOH X 473      30.793  12.294  41.067  0.00  0.00            
ATOM   1492  OW  HOH X 474      18.828  22.901  18.673  0.00  0.00            
ATOM   1493  HW1 HOH X 474      18.853  22.693  17.739  0.00  0.00            
ATOM   1494  HW2 HOH X 474      18.762  22.050  19.107  0.00  0.00            
ATOM   1495  OW  HOH X 475      23.181   7.573  15.473  0.00  0.00            
ATOM   1496  HW1 HOH X 475      23.737   7.086  16.082  0.00  0.00            
ATOM   1497  HW2 HOH X 475      23.238   8.481  15.769  0.00  0.00            
ATOM   1498  OW  HOH X 476      17.717  22.907  22.261  0.00  0.00            
ATOM   1499  HW1 HOH X 476      17.623  23.406  23.072  0.00  0.00            
ATOM   1500  HW2 HOH X 476      17.157  22.141  22.385  0.00  0.00            
ATOM   1501  OW  HOH X 477      23.892   6.030  26.002  0.00  0.00            
ATOM   1502  HW1 HOH X 477      23.725   5.153  25.656  0.00  0.00            
ATOM   1503  HW2 HOH X 477      24.495   5.890  26.732  0.00  0.00            
ATOM   1504  OW  HOH X 478      18.960  16.710   1.527  0.00  0.00            
ATOM   1505  HW1 HOH X 478      18.026  16.790   1.336  0.00  0.00            
ATOM   1506  HW2 HOH X 478      19.001  16.128   2.286  0.00  0.00            
ATOM   1507  OW  HOH X 479      19.532   4.959  34.420  0.00  0.00            
ATOM   1508  HW1 HOH X 479      19.403   5.786  33.957  0.00  0.00            
ATOM   1509  HW2 HOH X 479      19.635   5.211  35.338  0.00  0.00            
ATOM   1510  OW  HOH X 480      13.863  10.935   7.931  0.00  0.00            
ATOM   1511  HW1 HOH X 480      13.102  11.170   8.462  0.00  0.00            
ATOM   1512  HW2 HOH X 480      13.970   9.994   8.068  0.00  0.00            
ATOM   1513  OW  HOH X 481      25.053  -9.828  17.564  0.00  0.00            
ATOM   1514  HW1 HOH X 481      25.199 -10.772  17.637  0.00  0.00            
ATOM   1515  HW2 HOH X 481      25.933  -9.454  17.508  0.00  0.00            
ATOM   1516  OW  HOH X 482      34.649   2.696   9.859  0.00  0.00            
ATOM   1517  HW1 HOH X 482      34.845   2.933  10.766  0.00  0.00            
ATOM   1518  HW2 HOH X 482      35.229   3.250   9.336  0.00  0.00            
ATOM   1519  OW  HOH X 483      27.697   9.560  13.832  0.00  0.00            
ATOM   1520  HW1 HOH X 483      28.102   8.707  13.673  0.00  0.00            
ATOM   1521  HW2 HOH X 483      26.790   9.453  13.546  0.00  0.00            
ATOM   1522  OW  HOH X 484      16.985   7.820   3.733  0.00  0.00            
ATOM   1523  HW1 HOH X 484      17.889   7.522   3.839  0.00  0.00            
ATOM   1524  HW2 HOH X 484      16.457   7.029   3.839  0.00  0.00            
ATOM   1525  OW  HOH X 485      17.936   7.176  28.482  0.00  0.00            
ATOM   1526  HW1 HOH X 485      17.471   6.344  28.569  0.00  0.00            
ATOM   1527  HW2 HOH X 485      17.412   7.798  28.987  0.00  0.00            
ATOM   1528  OW  HOH X 486      37.370  16.979  42.118  0.00  0.00            
ATOM   1529  HW1 HOH X 486      37.908  17.582  41.606  0.00  0.00            
ATOM   1530  HW2 HOH X 486      36.748  17.543  42.578  0.00  0.00            
ATOM   1531  OW  HOH X 487      15.324   1.131  22.068  0.00  0.00            
ATOM   1532  HW1 HOH X 487      15.196   1.724  21.328  0.00  0.00            
ATOM   1533  HW2 HOH X 487      16.131   1.437  22.484  0.00  0.00            
ATOM   1534  OW  HOH X 488      20.741  20.548   4.635  0.00  0.00            
ATOM   1535  HW1 HOH X 488      20.504  21.064   5.406  0.00  0.00            
ATOM   1536  HW2 HOH X 488      20.176  19.776   4.680  0.00  0.00            
ATOM   1537  OW  HOH X 489      28.773   0.210  18.228  0.00  0.00            
ATOM   1538  HW1 HOH X 489      29.126   0.695  17.482  0.00  0.00            
ATOM   1539  HW2 HOH X 489      29.521  -0.278  18.573  0.00  0.00            
ATOM   1540  OW  HOH X 490      41.827  26.473  32.081  0.00  0.00            
ATOM   1541  HW1 HOH X 490      41.718  27.424  32.060  0.00  0.00            
ATOM   1542  HW2 HOH X 490      42.765  26.336  31.951  0.00  0.00            
ATOM   1543  OW  HOH X 491      37.474  -1.597  24.976  0.00  0.00            
ATOM   1544  HW1 HOH X 491      38.138  -2.048  24.454  0.00  0.00            
ATOM   1545  HW2 HOH X 491      37.840  -1.569  25.859  0.00  0.00            
ATOM   1546  OW  HOH X 492      21.832  23.704  14.213  0.00  0.00            
ATOM   1547  HW1 HOH X 492      21.907  24.286  14.969  0.00  0.00            
ATOM   1548  HW2 HOH X 492      21.976  22.827  14.569  0.00  0.00            
ATOM   1549  OW  HOH X 493      26.040  15.206   1.558  0.00  0.00            
ATOM   1550  HW1 HOH X 493      26.208  15.953   2.132  0.00  0.00            
ATOM   1551  HW2 HOH X 493      26.853  14.701   1.577  0.00  0.00            
ATOM   1552  OW  HOH X 494      10.443   9.454  26.091  0.00  0.00            
ATOM   1553  HW1 HOH X 494      11.030  10.090  25.684  0.00  0.00            
ATOM   1554  HW2 HOH X 494      10.991   8.684  26.242  0.00  0.00            
ATOM   1555  OW  HOH X 495      33.373  23.256  33.514  0.00  0.00            
ATOM   1556  HW1 HOH X 495      32.944  22.402  33.549  0.00  0.00            
ATOM   1557  HW2 HOH X 495      33.776  23.287  32.647  0.00  0.00            
ATOM   1558  OW  HOH X 496      21.550  12.235   9.566  0.00  0.00            
ATOM   1559  HW1 HOH X 496      22.249  11.584   9.628  0.00  0.00            
ATOM   1560  HW2 HOH X 496      20.890  11.938  10.192  0.00  0.00            
ATOM   1561  OW  HOH X 497      25.212  15.802   8.959  0.00  0.00            
ATOM   1562  HW1 HOH X 497      24.944  14.960   8.589  0.00  0.00            
ATOM   1563  HW2 HOH X 497      24.877  15.786   9.856  0.00  0.00            
ATOM   1564  OW  HOH X 498      48.784  15.033  23.853  0.00  0.00            
ATOM   1565  HW1 HOH X 498      49.334  14.482  23.296  0.00  0.00            
ATOM   1566  HW2 HOH X 498      48.823  14.618  24.715  0.00  0.00            
ATOM   1567  OW  HOH X 499      24.220   2.527  11.221  0.00  0.00            
ATOM   1568  HW1 HOH X 499      23.383   2.091  11.063  0.00  0.00            
ATOM   1569  HW2 HOH X 499      24.601   2.639  10.350  0.00  0.00            
ATOM   1570  OW  HOH X 500      21.961  -7.608  19.447  0.00  0.00            
ATOM   1571  HW1 HOH X 500      21.401  -7.892  18.723  0.00  0.00            
ATOM   1572  HW2 HOH X 500      22.258  -6.735  19.192  0.00  0.00            
ATOM   1573  OW  HOH X 501      23.425  -4.028  16.502  0.00  0.00            
ATOM   1574  HW1 HOH X 501      22.611  -4.526  16.416  0.00  0.00            
ATOM   1575  HW2 HOH X 501      23.900  -4.467  17.208  0.00  0.00            
ATOM   1576  OW  HOH X 502      30.642   1.501  27.415  0.00  0.00            
ATOM   1577  HW1 HOH X 502      29.739   1.290  27.653  0.00  0.00            
ATOM   1578  HW2 HOH X 502      30.875   0.850  26.755  0.00  0.00            
ATOM   1579  OW  HOH X 503      25.100   3.628   8.973  0.00  0.00            
ATOM   1580  HW1 HOH X 503      25.837   3.077   8.710  0.00  0.00            
ATOM   1581  HW2 HOH X 503      25.502   4.451   9.251  0.00  0.00            
ATOM   1582  OW  HOH X 504       9.583  18.763  19.451  0.00  0.00            
ATOM   1583  HW1 HOH X 504      10.040  19.052  18.661  0.00  0.00            
ATOM   1584  HW2 HOH X 504      10.241  18.275  19.945  0.00  0.00            
ATOM   1585  OW  HOH X 505      26.259  17.502   3.563  0.00  0.00            
ATOM   1586  HW1 HOH X 505      25.315  17.618   3.457  0.00  0.00            
ATOM   1587  HW2 HOH X 505      26.452  17.881   4.421  0.00  0.00            
ATOM   1588  OW  HOH X 506      19.987  11.871   4.579  0.00  0.00            
ATOM   1589  HW1 HOH X 506      19.181  11.897   4.064  0.00  0.00            
ATOM   1590  HW2 HOH X 506      20.684  12.039   3.945  0.00  0.00            
ATOM   1591  OW  HOH X 507      20.819  18.750   1.545  0.00  0.00            
ATOM   1592  HW1 HOH X 507      20.231  18.009   1.398  0.00  0.00            
ATOM   1593  HW2 HOH X 507      20.245  19.515   1.550  0.00  0.00            
ATOM   1594  OW  HOH X 508      32.559   8.123  36.202  0.00  0.00            
ATOM   1595  HW1 HOH X 508      32.225   8.568  35.423  0.00  0.00            
ATOM   1596  HW2 HOH X 508      31.879   8.254  36.863  0.00  0.00            
ATOM   1597  OW  HOH X 509       9.730   9.249  22.831  0.00  0.00            
ATOM   1598  HW1 HOH X 509       9.728   9.883  23.548  0.00  0.00            
ATOM   1599  HW2 HOH X 509       8.834   9.264  22.495  0.00  0.00            
ATOM   1600  OW  HOH X 510      36.279  -4.125  30.201  0.00  0.00            
ATOM   1601  HW1 HOH X 510      36.996  -4.431  30.756  0.00  0.00            
ATOM   1602  HW2 HOH X 510      35.973  -3.323  30.625  0.00  0.00            
ATOM   1603  OW  HOH X 511      32.722   6.005  26.597  0.00  0.00            
ATOM   1604  HW1 HOH X 511      31.988   5.410  26.446  0.00  0.00            
ATOM   1605  HW2 HOH X 511      33.241   5.578  27.279  0.00  0.00            
ATOM   1606  OW  HOH X 512      32.140   7.760   9.532  0.00  0.00            
ATOM   1607  HW1 HOH X 512      32.240   8.055   8.627  0.00  0.00            
ATOM   1608  HW2 HOH X 512      32.066   8.567  10.041  0.00  0.00            
ATOM   1609  OW  HOH X 513      42.428  -9.691  27.904  0.00  0.00            
ATOM   1610  HW1 HOH X 513      42.321 -10.578  27.560  0.00  0.00            
ATOM   1611  HW2 HOH X 513      41.967  -9.702  28.743  0.00  0.00            
ATOM   1612  OW  HOH X 514      28.325  10.293  27.803  0.00  0.00            
ATOM   1613  HW1 HOH X 514      28.819  10.416  28.614  0.00  0.00            
ATOM   1614  HW2 HOH X 514      28.812   9.621  27.325  0.00  0.00            
ATOM   1615  OW  HOH X 515      42.196   3.919  21.899  0.00  0.00            
ATOM   1616  HW1 HOH X 515      42.451   4.721  22.356  0.00  0.00            
ATOM   1617  HW2 HOH X 515      41.499   4.194  21.303  0.00  0.00            
ATOM   1618  OW  HOH X 516      32.942  -4.648  30.044  0.00  0.00            
ATOM   1619  HW1 HOH X 516      32.263  -4.714  30.716  0.00  0.00            
ATOM   1620  HW2 HOH X 516      33.422  -3.850  30.266  0.00  0.00            
ATOM   1621  OW  HOH X 517      12.348   9.092  32.479  0.00  0.00            
ATOM   1622  HW1 HOH X 517      12.501  10.036  32.449  0.00  0.00            
ATOM   1623  HW2 HOH X 517      12.266   8.832  31.562  0.00  0.00            
ATOM   1624  OW  HOH X 518      17.070   7.907  11.254  0.00  0.00            
ATOM   1625  HW1 HOH X 518      17.744   8.330  11.786  0.00  0.00            
ATOM   1626  HW2 HOH X 518      16.712   8.613  10.715  0.00  0.00            
ATOM   1627  OW  HOH X 519      21.932  -4.145  23.238  0.00  0.00            
ATOM   1628  HW1 HOH X 519      22.533  -3.463  23.537  0.00  0.00            
ATOM   1629  HW2 HOH X 519      21.104  -3.943  23.672  0.00  0.00            
ATOM   1630  OW  HOH X 520      23.703  16.386  11.652  0.00  0.00            
ATOM   1631  HW1 HOH X 520      22.933  16.455  12.217  0.00  0.00            
ATOM   1632  HW2 HOH X 520      24.345  16.974  12.049  0.00  0.00            
ATOM   1633  OW  HOH X 521      25.645  21.687   9.440  0.00  0.00            
ATOM   1634  HW1 HOH X 521      26.422  21.616   9.994  0.00  0.00            
ATOM   1635  HW2 HOH X 521      25.385  20.781   9.275  0.00  0.00            
ATOM   1636  OW  HOH X 522      47.471  14.911  27.448  0.00  0.00            
ATOM   1637  HW1 HOH X 522      47.634  14.728  28.374  0.00  0.00            
ATOM   1638  HW2 HOH X 522      46.840  14.243  27.180  0.00  0.00            
ATOM   1639  OW  HOH X 523      43.712  13.946  10.901  0.00  0.00            
ATOM   1640  HW1 HOH X 523      44.118  13.239  11.403  0.00  0.00            
ATOM   1641  HW2 HOH X 523      43.759  14.708  11.478  0.00  0.00            
ATOM   1642  OW  HOH X 524      19.786   6.129  17.163  0.00  0.00            
ATOM   1643  HW1 HOH X 524      19.976   5.318  16.691  0.00  0.00            
ATOM   1644  HW2 HOH X 524      18.979   5.943  17.644  0.00  0.00            
ATOM   1645  OW  HOH X 525      16.456  19.121   8.601  0.00  0.00            
ATOM   1646  HW1 HOH X 525      16.425  18.651   9.434  0.00  0.00            
ATOM   1647  HW2 HOH X 525      17.385  19.150   8.375  0.00  0.00            
ATOM   1648  OW  HOH X 526      17.802   1.865  23.740  0.00  0.00            
ATOM   1649  HW1 HOH X 526      18.084   2.492  24.407  0.00  0.00            
ATOM   1650  HW2 HOH X 526      17.700   1.040  24.215  0.00  0.00            
ATOM   1651  OW  HOH X 527      11.425  18.965  15.125  0.00  0.00            
ATOM   1652  HW1 HOH X 527      11.900  18.200  14.798  0.00  0.00            
ATOM   1653  HW2 HOH X 527      10.733  19.111  14.481  0.00  0.00            
ATOM   1654  OW  HOH X 528      33.820  11.573  18.772  0.00  0.00            
ATOM   1655  HW1 HOH X 528      33.213  11.509  18.035  0.00  0.00            
ATOM   1656  HW2 HOH X 528      34.547  10.998  18.536  0.00  0.00            
ATOM   1657  OW  HOH X 529      32.610  11.446  13.601  0.00  0.00            
ATOM   1658  HW1 HOH X 529      32.822  11.077  12.744  0.00  0.00            
ATOM   1659  HW2 HOH X 529      33.460  11.612  14.007  0.00  0.00            
ATOM   1660  OW  HOH X 530      29.956   7.565  40.754  0.00  0.00            
ATOM   1661  HW1 HOH X 530      29.194   7.114  41.117  0.00  0.00            
ATOM   1662  HW2 HOH X 530      30.022   8.373  41.263  0.00  0.00            
ATOM   1663  OW  HOH X 531      36.834   5.228  18.440  0.00  0.00            
ATOM   1664  HW1 HOH X 531      36.146   5.260  17.776  0.00  0.00            
ATOM   1665  HW2 HOH X 531      37.475   5.878  18.154  0.00  0.00            
ATOM   1666  OW  HOH X 532      26.188   9.735   5.219  0.00  0.00            
ATOM   1667  HW1 HOH X 532      26.974   9.290   4.901  0.00  0.00            
ATOM   1668  HW2 HOH X 532      26.249   9.677   6.173  0.00  0.00            
ATOM   1669  OW  HOH X 533      38.659  12.771  10.781  0.00  0.00            
ATOM   1670  HW1 HOH X 533      39.030  12.847   9.902  0.00  0.00            
ATOM   1671  HW2 HOH X 533      39.402  12.530  11.335  0.00  0.00            
ATOM   1672  OW  HOH X 534      48.153  10.440  16.731  0.00  0.00            
ATOM   1673  HW1 HOH X 534      47.534  10.975  17.227  0.00  0.00            
ATOM   1674  HW2 HOH X 534      47.999   9.547  17.040  0.00  0.00            
ATOM   1675  OW  HOH X 535      27.758  24.941  22.414  0.00  0.00            
ATOM   1676  HW1 HOH X 535      28.288  24.348  22.947  0.00  0.00            
ATOM   1677  HW2 HOH X 535      28.048  24.781  21.516  0.00  0.00            
ATOM   1678  OW  HOH X 536      24.036  16.393   0.083  0.00  0.00            
ATOM   1679  HW1 HOH X 536      24.226  16.821   0.917  0.00  0.00            
ATOM   1680  HW2 HOH X 536      24.412  15.517   0.172  0.00  0.00            
ATOM   1681  OW  HOH X 537      13.029   6.702  33.737  0.00  0.00            
ATOM   1682  HW1 HOH X 537      13.131   7.588  33.388  0.00  0.00            
ATOM   1683  HW2 HOH X 537      12.622   6.828  34.594  0.00  0.00            
ATOM   1684  OW  HOH X 538      39.218   3.821  18.985  0.00  0.00            
ATOM   1685  HW1 HOH X 538      39.482   4.312  19.764  0.00  0.00            
ATOM   1686  HW2 HOH X 538      38.347   4.157  18.773  0.00  0.00            
ATOM   1687  OW  HOH X 539      30.987  17.786  30.997  0.00  0.00            
ATOM   1688  HW1 HOH X 539      31.761  17.289  30.732  0.00  0.00            
ATOM   1689  HW2 HOH X 539      30.748  18.291  30.220  0.00  0.00            
ATOM   1690  OW  HOH X 540      38.354  23.379  31.175  0.00  0.00            
ATOM   1691  HW1 HOH X 540      38.653  22.788  31.866  0.00  0.00            
ATOM   1692  HW2 HOH X 540      37.525  23.730  31.501  0.00  0.00            
ATOM   1693  OW  HOH X 541      16.312  17.283   6.675  0.00  0.00            
ATOM   1694  HW1 HOH X 541      17.200  17.087   6.973  0.00  0.00            
ATOM   1695  HW2 HOH X 541      16.071  18.079   7.148  0.00  0.00            
ATOM   1696  OW  HOH X 542      17.791   8.166  21.071  0.00  0.00            
ATOM   1697  HW1 HOH X 542      18.112   8.032  21.963  0.00  0.00            
ATOM   1698  HW2 HOH X 542      18.363   8.844  20.710  0.00  0.00            
ATOM   1699  OW  HOH X 543       8.561   1.667  24.462  0.00  0.00            
ATOM   1700  HW1 HOH X 543       8.536   2.614  24.327  0.00  0.00            
ATOM   1701  HW2 HOH X 543       8.251   1.544  25.359  0.00  0.00            
ATOM   1702  OW  HOH X 544      42.596  -2.609  23.115  0.00  0.00            
ATOM   1703  HW1 HOH X 544      42.025  -2.899  22.405  0.00  0.00            
ATOM   1704  HW2 HOH X 544      43.396  -3.124  23.006  0.00  0.00            
ATOM   1705  OW  HOH X 545      28.451  -2.278  14.526  0.00  0.00            
ATOM   1706  HW1 HOH X 545      27.750  -2.563  15.112  0.00  0.00            
ATOM   1707  HW2 HOH X 545      28.889  -3.087  14.264  0.00  0.00            
ATOM   1708  OW  HOH X 546      34.847  14.126  18.779  0.00  0.00            
ATOM   1709  HW1 HOH X 546      34.501  13.234  18.787  0.00  0.00            
ATOM   1710  HW2 HOH X 546      35.029  14.321  19.698  0.00  0.00            
ATOM   1711  OW  HOH X 547      30.708  -2.247  10.885  0.00  0.00            
ATOM   1712  HW1 HOH X 547      31.174  -1.813  10.170  0.00  0.00            
ATOM   1713  HW2 HOH X 547      30.244  -1.540  11.333  0.00  0.00            
ATOM   1714  OW  HOH X 548      31.777   4.382  10.144  0.00  0.00            
ATOM   1715  HW1 HOH X 548      32.217   4.939  10.786  0.00  0.00            
ATOM   1716  HW2 HOH X 548      31.225   3.802  10.668  0.00  0.00            
ATOM   1717  OW  HOH X 549      31.840  -4.192  20.556  0.00  0.00            
ATOM   1718  HW1 HOH X 549      31.544  -4.819  21.217  0.00  0.00            
ATOM   1719  HW2 HOH X 549      32.623  -4.593  20.179  0.00  0.00            
ATOM   1720  OW  HOH X 550      28.931   9.456  42.317  0.00  0.00            
ATOM   1721  HW1 HOH X 550      29.706   9.251  42.840  0.00  0.00            
ATOM   1722  HW2 HOH X 550      28.956  10.407  42.213  0.00  0.00            
ATOM   1723  OW  HOH X 551      28.873   5.527  26.189  0.00  0.00            
ATOM   1724  HW1 HOH X 551      29.103   4.993  25.428  0.00  0.00            
ATOM   1725  HW2 HOH X 551      28.244   6.165  25.852  0.00  0.00            
ATOM   1726  OW  HOH X 552      40.095  19.412  38.201  0.00  0.00            
ATOM   1727  HW1 HOH X 552      39.323  19.794  38.618  0.00  0.00            
ATOM   1728  HW2 HOH X 552      40.692  20.150  38.079  0.00  0.00            
ATOM   1729  OW  HOH X 553      35.259  -3.023  22.624  0.00  0.00            
ATOM   1730  HW1 HOH X 553      34.702  -2.273  22.836  0.00  0.00            
ATOM   1731  HW2 HOH X 553      35.230  -3.572  23.407  0.00  0.00            
ATOM   1732  OW  HOH X 554      18.637  -1.970  11.773  0.00  0.00            
ATOM   1733  HW1 HOH X 554      19.201  -1.605  11.092  0.00  0.00            
ATOM   1734  HW2 HOH X 554      18.711  -1.353  12.501  0.00  0.00            
ATOM   1735  OW  HOH X 555      22.645  -1.039   9.453  0.00  0.00            
ATOM   1736  HW1 HOH X 555      22.604  -1.623  10.210  0.00  0.00            
ATOM   1737  HW2 HOH X 555      21.992  -0.363   9.636  0.00  0.00            
ATOM   1738  OW  HOH X 556      36.433   9.818  34.558  0.00  0.00            
ATOM   1739  HW1 HOH X 556      35.658  10.205  34.150  0.00  0.00            
ATOM   1740  HW2 HOH X 556      36.243   8.881  34.593  0.00  0.00            
ATOM   1741  OW  HOH X 557      14.821  -1.976  19.696  0.00  0.00            
ATOM   1742  HW1 HOH X 557      15.042  -1.783  18.785  0.00  0.00            
ATOM   1743  HW2 HOH X 557      15.242  -1.278  20.198  0.00  0.00            
ATOM   1744  OW  HOH X 558      28.154  27.786  22.066  0.00  0.00            
ATOM   1745  HW1 HOH X 558      27.486  27.749  21.381  0.00  0.00            
ATOM   1746  HW2 HOH X 558      27.901  27.101  22.685  0.00  0.00            
ATOM   1747  OW  HOH X 559      51.933   9.265  14.462  0.00  0.00            
ATOM   1748  HW1 HOH X 559      52.118   9.360  13.528  0.00  0.00            
ATOM   1749  HW2 HOH X 559      50.994   9.083  14.503  0.00  0.00            
ATOM   1750  OW  HOH X 560      26.825  12.752  28.190  0.00  0.00            
ATOM   1751  HW1 HOH X 560      26.074  13.336  28.294  0.00  0.00            
ATOM   1752  HW2 HOH X 560      27.505  13.134  28.745  0.00  0.00            
ATOM   1753  OW  HOH X 561      22.363  16.577  18.440  0.00  0.00            
ATOM   1754  HW1 HOH X 561      21.894  17.407  18.520  0.00  0.00            
ATOM   1755  HW2 HOH X 561      21.859  15.964  18.976  0.00  0.00            
ATOM   1756  OW  HOH X 562      25.056   6.322   3.070  0.00  0.00            
ATOM   1757  HW1 HOH X 562      24.435   5.621   2.870  0.00  0.00            
ATOM   1758  HW2 HOH X 562      25.100   6.840   2.267  0.00  0.00            
ATOM   1759  OW  HOH X 563      28.617   2.654  16.388  0.00  0.00            
ATOM   1760  HW1 HOH X 563      28.118   3.353  15.965  0.00  0.00            
ATOM   1761  HW2 HOH X 563      29.422   2.591  15.875  0.00  0.00            
ATOM   1762  OW  HOH X 564      23.467  17.232  28.375  0.00  0.00            
ATOM   1763  HW1 HOH X 564      23.542  18.135  28.068  0.00  0.00            
ATOM   1764  HW2 HOH X 564      22.528  17.046  28.346  0.00  0.00            
ATOM   1765  OW  HOH X 565      21.688  19.095  18.965  0.00  0.00            
ATOM   1766  HW1 HOH X 565      21.062  19.468  18.345  0.00  0.00            
ATOM   1767  HW2 HOH X 565      21.409  19.428  19.818  0.00  0.00            
ATOM   1768  OW  HOH X 566      33.313  16.367  30.273  0.00  0.00            
ATOM   1769  HW1 HOH X 566      32.901  16.082  29.458  0.00  0.00            
ATOM   1770  HW2 HOH X 566      34.247  16.207  30.140  0.00  0.00            
ATOM   1771  OW  HOH X 567      25.124  11.438  25.219  0.00  0.00            
ATOM   1772  HW1 HOH X 567      24.233  11.789  25.212  0.00  0.00            
ATOM   1773  HW2 HOH X 567      25.090  10.686  24.628  0.00  0.00            
ATOM   1774  OW  HOH X 568      18.247  -7.211  10.476  0.00  0.00            
ATOM   1775  HW1 HOH X 568      17.941  -6.374  10.826  0.00  0.00            
ATOM   1776  HW2 HOH X 568      18.260  -7.798  11.232  0.00  0.00            
ATOM   1777  OW  HOH X 569      38.990  -0.252  35.334  0.00  0.00            
ATOM   1778  HW1 HOH X 569      39.115   0.435  34.680  0.00  0.00            
ATOM   1779  HW2 HOH X 569      38.706   0.214  36.120  0.00  0.00            
ATOM   1780  OW  HOH X 570      33.955  10.731  33.874  0.00  0.00            
ATOM   1781  HW1 HOH X 570      33.904  11.303  33.108  0.00  0.00            
ATOM   1782  HW2 HOH X 570      33.274  10.075  33.730  0.00  0.00            
ATOM   1783  OW  HOH X 571      32.361  16.083  13.574  0.00  0.00            
ATOM   1784  HW1 HOH X 571      32.236  16.777  12.927  0.00  0.00            
ATOM   1785  HW2 HOH X 571      31.889  15.332  13.215  0.00  0.00            
ATOM   1786  OW  HOH X 572      44.403   9.273  27.132  0.00  0.00            
ATOM   1787  HW1 HOH X 572      43.645   8.715  26.954  0.00  0.00            
ATOM   1788  HW2 HOH X 572      44.053   9.991  27.659  0.00  0.00            
ATOM   1789  OW  HOH X 573      23.791  -1.392  28.033  0.00  0.00            
ATOM   1790  HW1 HOH X 573      23.494  -2.140  28.550  0.00  0.00            
ATOM   1791  HW2 HOH X 573      23.410  -0.631  28.471  0.00  0.00            
ATOM   1792  OW  HOH X 574      19.135   5.423  14.116  0.00  0.00            
ATOM   1793  HW1 HOH X 574      18.886   5.283  13.202  0.00  0.00            
ATOM   1794  HW2 HOH X 574      18.545   4.858  14.615  0.00  0.00            
ATOM   1795  OW  HOH X 575      35.911  -4.763  20.659  0.00  0.00            
ATOM   1796  HW1 HOH X 575      36.342  -5.506  21.082  0.00  0.00            
ATOM   1797  HW2 HOH X 575      35.896  -4.081  21.331  0.00  0.00            
ATOM   1798  OW  HOH X 576      10.290   2.082  16.633  0.00  0.00            
ATOM   1799  HW1 HOH X 576       9.891   1.308  16.234  0.00  0.00            
ATOM   1800  HW2 HOH X 576       9.811   2.820  16.257  0.00  0.00            
ATOM   1801  OW  HOH X 577      25.968   2.229   5.847  0.00  0.00            
ATOM   1802  HW1 HOH X 577      26.416   2.302   6.690  0.00  0.00            
ATOM   1803  HW2 HOH X 577      25.563   1.362   5.864  0.00  0.00            
ATOM   1804  OW  HOH X 578      20.869   7.882  27.444  0.00  0.00            
ATOM   1805  HW1 HOH X 578      20.038   7.634  27.848  0.00  0.00            
ATOM   1806  HW2 HOH X 578      20.750   7.694  26.513  0.00  0.00            
ATOM   1807  OW  HOH X 579      35.385  10.516   8.859  0.00  0.00            
ATOM   1808  HW1 HOH X 579      35.498  11.265   8.273  0.00  0.00            
ATOM   1809  HW2 HOH X 579      34.821   9.914   8.373  0.00  0.00            
ATOM   1810  OW  HOH X 580      22.685  12.304  24.830  0.00  0.00            
ATOM   1811  HW1 HOH X 580      22.551  13.106  25.335  0.00  0.00            
ATOM   1812  HW2 HOH X 580      22.015  11.701  25.154  0.00  0.00            
ATOM   1813  OW  HOH X 581      35.920  14.299  21.344  0.00  0.00            
ATOM   1814  HW1 HOH X 581      35.043  14.147  21.697  0.00  0.00            
ATOM   1815  HW2 HOH X 581      36.511  14.063  22.059  0.00  0.00            
ATOM   1816  OW  HOH X 582       4.937  10.101  24.729  0.00  0.00            
ATOM   1817  HW1 HOH X 582       5.801  10.074  25.140  0.00  0.00            
ATOM   1818  HW2 HOH X 582       4.322  10.103  25.463  0.00  0.00            
ATOM   1819  OW  HOH X 583      27.838  16.278  31.973  0.00  0.00            
ATOM   1820  HW1 HOH X 583      28.766  16.453  32.131  0.00  0.00            
ATOM   1821  HW2 HOH X 583      27.383  16.745  32.674  0.00  0.00            
ATOM   1822  OW  HOH X 584      18.016  14.734  30.762  0.00  0.00            
ATOM   1823  HW1 HOH X 584      17.593  15.486  30.347  0.00  0.00            
ATOM   1824  HW2 HOH X 584      18.494  15.107  31.503  0.00  0.00            
ATOM   1825  OW  HOH X 585      16.311   9.802  14.155  0.00  0.00            
ATOM   1826  HW1 HOH X 585      15.934   9.050  14.613  0.00  0.00            
ATOM   1827  HW2 HOH X 585      17.029   9.433  13.640  0.00  0.00            
ATOM   1828  OW  HOH X 586      27.689   6.784  35.519  0.00  0.00            
ATOM   1829  HW1 HOH X 586      27.052   6.843  34.808  0.00  0.00            
ATOM   1830  HW2 HOH X 586      28.010   5.883  35.481  0.00  0.00            
ATOM   1831  OW  HOH X 587      16.863 -11.139  10.023  0.00  0.00            
ATOM   1832  HW1 HOH X 587      17.175 -10.489   9.393  0.00  0.00            
ATOM   1833  HW2 HOH X 587      16.196 -11.633   9.547  0.00  0.00            
ATOM   1834  OW  HOH X 588      21.233   8.362  17.678  0.00  0.00            
ATOM   1835  HW1 HOH X 588      21.981   7.967  18.126  0.00  0.00            
ATOM   1836  HW2 HOH X 588      20.711   7.617  17.381  0.00  0.00            
ATOM   1837  OW  HOH X 589      23.608   2.789  20.132  0.00  0.00            
ATOM   1838  HW1 HOH X 589      22.787   3.142  19.789  0.00  0.00            
ATOM   1839  HW2 HOH X 589      23.733   3.239  20.967  0.00  0.00            
ATOM   1840  OW  HOH X 590      44.896  19.615  20.491  0.00  0.00            
ATOM   1841  HW1 HOH X 590      44.707  19.168  19.666  0.00  0.00            
ATOM   1842  HW2 HOH X 590      45.732  20.056  20.339  0.00  0.00            
ATOM   1843  OW  HOH X 591      22.649  11.917  -3.973  0.00  0.00            
ATOM   1844  HW1 HOH X 591      23.228  11.905  -4.735  0.00  0.00            
ATOM   1845  HW2 HOH X 591      21.970  11.274  -4.177  0.00  0.00            
ATOM   1846  OW  HOH X 592      38.567  18.335  28.384  0.00  0.00            
ATOM   1847  HW1 HOH X 592      38.802  19.051  27.793  0.00  0.00            
ATOM   1848  HW2 HOH X 592      37.724  18.021  28.057  0.00  0.00            
ATOM   1849  OW  HOH X 593      54.156  10.574  15.685  0.00  0.00            
ATOM   1850  HW1 HOH X 593      53.315  10.303  15.315  0.00  0.00            
ATOM   1851  HW2 HOH X 593      54.185  10.156  16.546  0.00  0.00            
ATOM   1852  OW  HOH X 594      20.235   6.446  30.669  0.00  0.00            
ATOM   1853  HW1 HOH X 594      20.455   6.324  29.746  0.00  0.00            
ATOM   1854  HW2 HOH X 594      20.908   7.040  31.001  0.00  0.00            
ATOM   1855  OW  HOH X 595      30.917  -3.161  18.204  0.00  0.00            
ATOM   1856  HW1 HOH X 595      30.867  -2.224  18.393  0.00  0.00            
ATOM   1857  HW2 HOH X 595      31.274  -3.548  19.004  0.00  0.00            
ATOM   1858  OW  HOH X 596      32.591  29.361  26.470  0.00  0.00            
ATOM   1859  HW1 HOH X 596      31.736  28.942  26.572  0.00  0.00            
ATOM   1860  HW2 HOH X 596      32.389  30.253  26.188  0.00  0.00            
ATOM   1861  OW  HOH X 597      21.064   6.430   8.151  0.00  0.00            
ATOM   1862  HW1 HOH X 597      21.181   6.461   9.100  0.00  0.00            
ATOM   1863  HW2 HOH X 597      21.634   5.718   7.862  0.00  0.00            
ATOM   1864  OW  HOH X 598      29.116   1.187  20.803  0.00  0.00            
ATOM   1865  HW1 HOH X 598      28.971   0.877  19.909  0.00  0.00            
ATOM   1866  HW2 HOH X 598      28.364   1.750  20.987  0.00  0.00            
ATOM   1867  OW  HOH X 599      23.004  -4.003  13.836  0.00  0.00            
ATOM   1868  HW1 HOH X 599      22.929  -4.953  13.930  0.00  0.00            
ATOM   1869  HW2 HOH X 599      23.395  -3.710  14.659  0.00  0.00            
ATOM   1870  OW  HOH X 600      25.588  26.634  21.440  0.00  0.00            
ATOM   1871  HW1 HOH X 600      26.065  25.931  21.881  0.00  0.00            
ATOM   1872  HW2 HOH X 600      24.942  26.926  22.084  0.00  0.00            
ATOM   1873  OW  HOH X 601       9.444  21.166  14.712  0.00  0.00            
ATOM   1874  HW1 HOH X 601       9.865  20.755  13.957  0.00  0.00            
ATOM   1875  HW2 HOH X 601      10.151  21.284  15.346  0.00  0.00            
ATOM   1876  OW  HOH X 602      22.637  26.588  13.863  0.00  0.00            
ATOM   1877  HW1 HOH X 602      22.386  26.643  12.941  0.00  0.00            
ATOM   1878  HW2 HOH X 602      21.851  26.853  14.341  0.00  0.00            
ATOM   1879  OW  HOH X 603      27.304   8.420  -0.448  0.00  0.00            
ATOM   1880  HW1 HOH X 603      27.783   8.653   0.348  0.00  0.00            
ATOM   1881  HW2 HOH X 603      26.418   8.222  -0.145  0.00  0.00            
ATOM   1882  OW  HOH X 604      24.476  17.253  22.314  0.00  0.00            
ATOM   1883  HW1 HOH X 604      24.893  16.419  22.529  0.00  0.00            
ATOM   1884  HW2 HOH X 604      24.785  17.857  22.989  0.00  0.00            
ATOM   1885  OW  HOH X 605      38.164   5.142  24.985  0.00  0.00            
ATOM   1886  HW1 HOH X 605      37.370   4.627  25.125  0.00  0.00            
ATOM   1887  HW2 HOH X 605      38.387   5.481  25.852  0.00  0.00            
ATOM   1888  OW  HOH X 606      39.197   6.371  36.014  0.00  0.00            
ATOM   1889  HW1 HOH X 606      39.750   5.589  36.015  0.00  0.00            
ATOM   1890  HW2 HOH X 606      39.756   7.060  35.654  0.00  0.00            
ATOM   1891  OW  HOH X 607      47.740   4.725  17.550  0.00  0.00            
ATOM   1892  HW1 HOH X 607      47.457   4.825  16.641  0.00  0.00            
ATOM   1893  HW2 HOH X 607      47.651   3.789  17.728  0.00  0.00            
ATOM   1894  OW  HOH X 608      21.558  11.045   6.674  0.00  0.00            
ATOM   1895  HW1 HOH X 608      21.255  11.650   5.997  0.00  0.00            
ATOM   1896  HW2 HOH X 608      21.463  11.533   7.492  0.00  0.00            
ATOM   1897  OW  HOH X 609      34.281  12.465  35.927  0.00  0.00            
ATOM   1898  HW1 HOH X 609      34.434  11.830  35.227  0.00  0.00            
ATOM   1899  HW2 HOH X 609      33.432  12.219  36.293  0.00  0.00            
ATOM   1900  OW  HOH X 610      27.521  -6.353  17.566  0.00  0.00            
ATOM   1901  HW1 HOH X 610      27.624  -5.468  17.916  0.00  0.00            
ATOM   1902  HW2 HOH X 610      28.414  -6.648  17.391  0.00  0.00            
ATOM   1903  OW  HOH X 611      21.999   6.835  38.806  0.00  0.00            
ATOM   1904  HW1 HOH X 611      22.194   5.960  39.141  0.00  0.00            
ATOM   1905  HW2 HOH X 611      22.640   7.404  39.234  0.00  0.00            
ATOM   1906  OW  HOH X 612      26.291   4.754  19.325  0.00  0.00            
ATOM   1907  HW1 HOH X 612      26.161   3.847  19.048  0.00  0.00            
ATOM   1908  HW2 HOH X 612      26.434   4.698  20.270  0.00  0.00            
ATOM   1909  OW  HOH X 613      37.897  18.499  13.475  0.00  0.00            
ATOM   1910  HW1 HOH X 613      37.749  18.067  14.317  0.00  0.00            
ATOM   1911  HW2 HOH X 613      38.844  18.633  13.437  0.00  0.00            
ATOM   1912  OW  HOH X 614      24.198  14.458  22.632  0.00  0.00            
ATOM   1913  HW1 HOH X 614      23.393  14.976  22.632  0.00  0.00            
ATOM   1914  HW2 HOH X 614      24.304  14.180  23.541  0.00  0.00            
ATOM   1915  OW  HOH X 615      40.930  12.788  25.512  0.00  0.00            
ATOM   1916  HW1 HOH X 615      40.723  12.058  24.930  0.00  0.00            
ATOM   1917  HW2 HOH X 615      41.088  13.527  24.924  0.00  0.00            
ATOM   1918  OW  HOH X 616      11.045  13.659  25.123  0.00  0.00            
ATOM   1919  HW1 HOH X 616      11.193  14.419  25.687  0.00  0.00            
ATOM   1920  HW2 HOH X 616      10.093  13.600  25.046  0.00  0.00            
ATOM   1921  OW  HOH X 617      15.579  -1.530  22.746  0.00  0.00            
ATOM   1922  HW1 HOH X 617      15.636  -1.412  23.694  0.00  0.00            
ATOM   1923  HW2 HOH X 617      15.329  -0.669  22.411  0.00  0.00            
ATOM   1924  OW  HOH X 618      34.170  -8.316  20.003  0.00  0.00            
ATOM   1925  HW1 HOH X 618      34.116  -7.409  19.702  0.00  0.00            
ATOM   1926  HW2 HOH X 618      34.746  -8.282  20.767  0.00  0.00            
ATOM   1927  OW  HOH X 619      18.010  -8.721  12.994  0.00  0.00            
ATOM   1928  HW1 HOH X 619      18.201  -9.394  13.647  0.00  0.00            
ATOM   1929  HW2 HOH X 619      17.538  -8.043  13.478  0.00  0.00            
ATOM   1930  OW  HOH X 620      30.252   1.881  31.889  0.00  0.00            
ATOM   1931  HW1 HOH X 620      29.327   1.959  32.122  0.00  0.00            
ATOM   1932  HW2 HOH X 620      30.656   1.461  32.649  0.00  0.00            
ATOM   1933  OW  HOH X 621      38.783   8.577  33.452  0.00  0.00            
ATOM   1934  HW1 HOH X 621      39.508   8.565  34.076  0.00  0.00            
ATOM   1935  HW2 HOH X 621      38.091   9.067  33.896  0.00  0.00            
ATOM   1936  OW  HOH X 622      25.744   9.485  27.440  0.00  0.00            
ATOM   1937  HW1 HOH X 622      25.581   8.700  26.917  0.00  0.00            
ATOM   1938  HW2 HOH X 622      25.824   9.162  28.337  0.00  0.00            
ATOM   1939  OW  HOH X 623      35.905   5.187  33.559  0.00  0.00            
ATOM   1940  HW1 HOH X 623      35.322   5.746  34.074  0.00  0.00            
ATOM   1941  HW2 HOH X 623      35.717   4.299  33.864  0.00  0.00            
ATOM   1942  OW  HOH X 624      40.955  13.768  21.458  0.00  0.00            
ATOM   1943  HW1 HOH X 624      40.814  14.214  22.293  0.00  0.00            
ATOM   1944  HW2 HOH X 624      41.323  12.918  21.699  0.00  0.00            
ATOM   1945  OW  HOH X 625      37.664  13.320  40.367  0.00  0.00            
ATOM   1946  HW1 HOH X 625      37.447  12.912  39.529  0.00  0.00            
ATOM   1947  HW2 HOH X 625      37.604  14.261  40.199  0.00  0.00            
ATOM   1948  OW  HOH X 626      23.351   0.888   5.072  0.00  0.00            
ATOM   1949  HW1 HOH X 626      23.257   0.869   6.024  0.00  0.00            
ATOM   1950  HW2 HOH X 626      22.619   0.362   4.749  0.00  0.00            
ATOM   1951  OW  HOH X 627      28.102  15.213  38.538  0.00  0.00            
ATOM   1952  HW1 HOH X 627      29.049  15.176  38.405  0.00  0.00            
ATOM   1953  HW2 HOH X 627      27.731  14.934  37.701  0.00  0.00            
ATOM   1954  OW  HOH X 628      18.746  16.789   8.122  0.00  0.00            
ATOM   1955  HW1 HOH X 628      19.369  16.172   7.738  0.00  0.00            
ATOM   1956  HW2 HOH X 628      18.276  16.276   8.781  0.00  0.00            
ATOM   1957  OW  HOH X 629      29.989  17.168  33.468  0.00  0.00            
ATOM   1958  HW1 HOH X 629      30.531  17.123  32.681  0.00  0.00            
ATOM   1959  HW2 HOH X 629      30.608  17.349  34.176  0.00  0.00            
ATOM   1960  OW  HOH X 630      23.798  11.688  -1.439  0.00  0.00            
ATOM   1961  HW1 HOH X 630      23.433  12.005  -2.265  0.00  0.00            
ATOM   1962  HW2 HOH X 630      23.145  11.927  -0.780  0.00  0.00            
ATOM   1963  OW  HOH X 631      33.870   7.801  12.333  0.00  0.00            
ATOM   1964  HW1 HOH X 631      33.883   8.074  13.250  0.00  0.00            
ATOM   1965  HW2 HOH X 631      34.007   8.610  11.840  0.00  0.00            
ATOM   1966  OW  HOH X 632      35.398 -10.213  23.353  0.00  0.00            
ATOM   1967  HW1 HOH X 632      35.907  -9.705  23.986  0.00  0.00            
ATOM   1968  HW2 HOH X 632      36.054 -10.700  22.854  0.00  0.00            
ATOM   1969  OW  HOH X 633      23.129   8.555  11.703  0.00  0.00            
ATOM   1970  HW1 HOH X 633      22.336   8.296  12.172  0.00  0.00            
ATOM   1971  HW2 HOH X 633      23.348   7.795  11.164  0.00  0.00            
ATOM   1972  OW  HOH X 634      38.485  20.777  16.752  0.00  0.00            
ATOM   1973  HW1 HOH X 634      38.116  21.462  17.310  0.00  0.00            
ATOM   1974  HW2 HOH X 634      37.771  20.539  16.161  0.00  0.00            
ATOM   1975  OW  HOH X 635      24.169  15.227   5.237  0.00  0.00            
ATOM   1976  HW1 HOH X 635      24.652  14.788   4.537  0.00  0.00            
ATOM   1977  HW2 HOH X 635      23.763  14.515   5.732  0.00  0.00            
ATOM   1978  OW  HOH X 636       8.096  12.044  22.096  0.00  0.00            
ATOM   1979  HW1 HOH X 636       7.994  11.114  21.892  0.00  0.00            
ATOM   1980  HW2 HOH X 636       9.028  12.218  21.963  0.00  0.00            
ATOM   1981  OW  HOH X 637      11.892  19.327  17.783  0.00  0.00            
ATOM   1982  HW1 HOH X 637      11.742  19.336  16.838  0.00  0.00            
ATOM   1983  HW2 HOH X 637      12.321  18.488  17.950  0.00  0.00            
ATOM   1984  OW  HOH X 638      16.582  17.821  11.056  0.00  0.00            
ATOM   1985  HW1 HOH X 638      16.659  16.913  11.347  0.00  0.00            
ATOM   1986  HW2 HOH X 638      15.701  18.084  11.321  0.00  0.00            
ATOM   1987  OW  HOH X 639      35.901   8.282  22.957  0.00  0.00            
ATOM   1988  HW1 HOH X 639      36.642   8.353  23.559  0.00  0.00            
ATOM   1989  HW2 HOH X 639      35.267   7.735  23.420  0.00  0.00            
ATOM   1990  OW  HOH X 640      26.809  -0.490  23.959  0.00  0.00            
ATOM   1991  HW1 HOH X 640      27.475  -0.091  24.518  0.00  0.00            
ATOM   1992  HW2 HOH X 640      27.306  -0.993  23.313  0.00  0.00            
ATOM   1993  OW  HOH X 641      16.079  -1.302  10.918  0.00  0.00            
ATOM   1994  HW1 HOH X 641      16.049  -1.508   9.984  0.00  0.00            
ATOM   1995  HW2 HOH X 641      16.941  -1.603  11.203  0.00  0.00            
ATOM   1996  OW  HOH X 642      43.476  23.351  27.998  0.00  0.00            
ATOM   1997  HW1 HOH X 642      43.678  22.432  28.173  0.00  0.00            
ATOM   1998  HW2 HOH X 642      42.526  23.371  27.884  0.00  0.00            
ATOM   1999  OW  HOH X 643      42.996  14.370  26.741  0.00  0.00            
ATOM   2000  HW1 HOH X 643      42.334  13.687  26.640  0.00  0.00            
ATOM   2001  HW2 HOH X 643      42.531  15.097  27.155  0.00  0.00            
ATOM   2002  OW  HOH X 644       5.893  13.934  22.877  0.00  0.00            
ATOM   2003  HW1 HOH X 644       6.125  13.397  22.119  0.00  0.00            
ATOM   2004  HW2 HOH X 644       5.186  13.451  23.305  0.00  0.00            
ATOM   2005  OW  HOH X 645       9.320  15.447  19.750  0.00  0.00            
ATOM   2006  HW1 HOH X 645       8.526  15.599  20.262  0.00  0.00            
ATOM   2007  HW2 HOH X 645       9.193  15.959  18.952  0.00  0.00            
ATOM   2008  OW  HOH X 646      34.621   6.726   8.118  0.00  0.00            
ATOM   2009  HW1 HOH X 646      33.733   6.933   8.410  0.00  0.00            
ATOM   2010  HW2 HOH X 646      35.078   6.454   8.914  0.00  0.00            
ATOM   2011  OW  HOH X 647      21.528  10.736  -0.207  0.00  0.00            
ATOM   2012  HW1 HOH X 647      21.346  11.649   0.013  0.00  0.00            
ATOM   2013  HW2 HOH X 647      20.987  10.563  -0.978  0.00  0.00            
ATOM   2014  OW  HOH X 648      47.585  13.907  13.571  0.00  0.00            
ATOM   2015  HW1 HOH X 648      47.340  14.635  13.001  0.00  0.00            
ATOM   2016  HW2 HOH X 648      47.113  14.071  14.387  0.00  0.00            
ATOM   2017  OW  HOH X 649      25.597   3.084  29.905  0.00  0.00            
ATOM   2018  HW1 HOH X 649      26.496   3.310  30.142  0.00  0.00            
ATOM   2019  HW2 HOH X 649      25.060   3.487  30.587  0.00  0.00            
ATOM   2020  OW  HOH X 650      34.991  15.740  40.979  0.00  0.00            
ATOM   2021  HW1 HOH X 650      34.552  16.375  40.413  0.00  0.00            
ATOM   2022  HW2 HOH X 650      35.870  16.099  41.106  0.00  0.00            
ATOM   2023  OW  HOH X 651      36.902  19.055  39.179  0.00  0.00            
ATOM   2024  HW1 HOH X 651      36.852  20.010  39.152  0.00  0.00            
ATOM   2025  HW2 HOH X 651      36.054  18.780  39.527  0.00  0.00            
ATOM   2026  OW  HOH X 652      24.525  13.002   7.984  0.00  0.00            
ATOM   2027  HW1 HOH X 652      24.141  12.304   8.514  0.00  0.00            
ATOM   2028  HW2 HOH X 652      25.184  12.561   7.447  0.00  0.00            
ATOM   2029  OW  HOH X 653      37.591  16.691  20.606  0.00  0.00            
ATOM   2030  HW1 HOH X 653      36.847  17.207  20.916  0.00  0.00            
ATOM   2031  HW2 HOH X 653      37.264  15.793  20.573  0.00  0.00            
ATOM   2032  OW  HOH X 654      36.102  25.670  24.382  0.00  0.00            
ATOM   2033  HW1 HOH X 654      36.628  25.305  23.670  0.00  0.00            
ATOM   2034  HW2 HOH X 654      35.515  24.958  24.635  0.00  0.00            
ATOM   2035  OW  HOH X 655      40.220   1.031  20.495  0.00  0.00            
ATOM   2036  HW1 HOH X 655      40.665   0.225  20.758  0.00  0.00            
ATOM   2037  HW2 HOH X 655      40.739   1.364  19.764  0.00  0.00            
ATOM   2038  OW  HOH X 656      17.677  15.671   3.853  0.00  0.00            
ATOM   2039  HW1 HOH X 656      16.800  15.350   4.062  0.00  0.00            
ATOM   2040  HW2 HOH X 656      17.967  16.114   4.650  0.00  0.00            
ATOM   2041  OW  HOH X 657      46.427  21.006  26.643  0.00  0.00            
ATOM   2042  HW1 HOH X 657      45.742  21.616  26.369  0.00  0.00            
ATOM   2043  HW2 HOH X 657      46.910  21.477  27.322  0.00  0.00            
ATOM   2044  OW  HOH X 658      16.694  14.911   9.116  0.00  0.00            
ATOM   2045  HW1 HOH X 658      16.067  15.540   8.759  0.00  0.00            
ATOM   2046  HW2 HOH X 658      16.442  14.074   8.727  0.00  0.00            
ATOM   2047  OW  HOH X 659      29.170   5.034  18.600  0.00  0.00            
ATOM   2048  HW1 HOH X 659      29.316   4.097  18.469  0.00  0.00            
ATOM   2049  HW2 HOH X 659      28.306   5.086  19.011  0.00  0.00            
ATOM   2050  OW  HOH X 660      33.783   6.766  24.192  0.00  0.00            
ATOM   2051  HW1 HOH X 660      34.025   6.818  25.117  0.00  0.00            
ATOM   2052  HW2 HOH X 660      32.847   6.567  24.199  0.00  0.00            
ATOM   2053  OW  HOH X 661      16.255  15.227  11.715  0.00  0.00            
ATOM   2054  HW1 HOH X 661      16.532  14.879  10.868  0.00  0.00            
ATOM   2055  HW2 HOH X 661      16.362  14.494  12.322  0.00  0.00            
ATOM   2056  OW  HOH X 662      40.578  10.342   5.347  0.00  0.00            
ATOM   2057  HW1 HOH X 662      40.799  10.425   6.275  0.00  0.00            
ATOM   2058  HW2 HOH X 662      41.243   9.751   4.994  0.00  0.00            
ATOM   2059  OW  HOH X 663      45.435  16.203  25.534  0.00  0.00            
ATOM   2060  HW1 HOH X 663      45.681  15.315  25.790  0.00  0.00            
ATOM   2061  HW2 HOH X 663      46.041  16.768  26.013  0.00  0.00            
ATOM   2062  OW  HOH X 664      43.576   6.870  30.830  0.00  0.00            
ATOM   2063  HW1 HOH X 664      44.172   6.947  30.085  0.00  0.00            
ATOM   2064  HW2 HOH X 664      43.059   7.675  30.807  0.00  0.00            
ATOM   2065  OW  HOH X 665      21.047   4.129  19.133  0.00  0.00            
ATOM   2066  HW1 HOH X 665      20.514   4.170  18.339  0.00  0.00            
ATOM   2067  HW2 HOH X 665      21.582   4.922  19.105  0.00  0.00            
ATOM   2068  OW  HOH X 666      14.779  27.300  11.290  0.00  0.00            
ATOM   2069  HW1 HOH X 666      14.953  27.905  10.570  0.00  0.00            
ATOM   2070  HW2 HOH X 666      14.007  26.808  11.010  0.00  0.00            
ATOM   2071  OW  HOH X 667      15.687  21.119  22.004  0.00  0.00            
ATOM   2072  HW1 HOH X 667      14.875  21.474  21.640  0.00  0.00            
ATOM   2073  HW2 HOH X 667      15.403  20.400  22.568  0.00  0.00            
ATOM   2074  OW  HOH X 668      34.727  22.492  28.223  0.00  0.00            
ATOM   2075  HW1 HOH X 668      35.540  22.625  28.710  0.00  0.00            
ATOM   2076  HW2 HOH X 668      34.476  23.368  27.930  0.00  0.00            
ATOM   2077  OW  HOH X 669      27.157  -0.710   8.549  0.00  0.00            
ATOM   2078  HW1 HOH X 669      28.038  -0.390   8.740  0.00  0.00            
ATOM   2079  HW2 HOH X 669      26.888  -1.165   9.347  0.00  0.00            
ATOM   2080  OW  HOH X 670       6.737  18.367  18.943  0.00  0.00            
ATOM   2081  HW1 HOH X 670       7.648  18.127  18.773  0.00  0.00            
ATOM   2082  HW2 HOH X 670       6.624  19.208  18.500  0.00  0.00            
ATOM   2083  OW  HOH X 671      32.507   6.917  40.232  0.00  0.00            
ATOM   2084  HW1 HOH X 671      31.601   7.105  40.476  0.00  0.00            
ATOM   2085  HW2 HOH X 671      32.446   6.531  39.358  0.00  0.00            
ATOM   2086  OW  HOH X 672      10.685  12.709  21.861  0.00  0.00            
ATOM   2087  HW1 HOH X 672      10.616  13.457  22.453  0.00  0.00            
ATOM   2088  HW2 HOH X 672      11.581  12.393  21.976  0.00  0.00            
ATOM   2089  OW  HOH X 673      39.897  -2.157  26.570  0.00  0.00            
ATOM   2090  HW1 HOH X 673      40.112  -1.456  25.955  0.00  0.00            
ATOM   2091  HW2 HOH X 673      40.480  -2.877  26.327  0.00  0.00            
ATOM   2092  OW  HOH X 674      34.555  14.685  14.319  0.00  0.00            
ATOM   2093  HW1 HOH X 674      35.184  15.216  13.829  0.00  0.00            
ATOM   2094  HW2 HOH X 674      33.699  14.982  14.011  0.00  0.00            
ATOM   2095  OW  HOH X 675      16.186  15.532  18.672  0.00  0.00            
ATOM   2096  HW1 HOH X 675      16.403  15.102  19.499  0.00  0.00            
ATOM   2097  HW2 HOH X 675      15.240  15.415  18.582  0.00  0.00            
ATOM   2098  OW  HOH X 676      20.823  16.479  28.772  0.00  0.00            
ATOM   2099  HW1 HOH X 676      20.531  17.331  29.095  0.00  0.00            
ATOM   2100  HW2 HOH X 676      20.594  15.866  29.470  0.00  0.00            
ATOM   2101  OW  HOH X 677      13.765 -10.967   9.914  0.00  0.00            
ATOM   2102  HW1 HOH X 677      13.101 -10.420   9.494  0.00  0.00            
ATOM   2103  HW2 HOH X 677      14.060 -11.560   9.223  0.00  0.00            
ATOM   2104  OW  HOH X 678       8.426   4.022  15.662  0.00  0.00            
ATOM   2105  HW1 HOH X 678       7.783   3.316  15.725  0.00  0.00            
ATOM   2106  HW2 HOH X 678       8.209   4.609  16.386  0.00  0.00            
ATOM   2107  OW  HOH X 679      44.582  15.841  32.231  0.00  0.00            
ATOM   2108  HW1 HOH X 679      44.128  16.681  32.168  0.00  0.00            
ATOM   2109  HW2 HOH X 679      45.200  15.847  31.500  0.00  0.00            
ATOM   2110  OW  HOH X 680      32.053   4.269  33.535  0.00  0.00            
ATOM   2111  HW1 HOH X 680      31.996   3.401  33.934  0.00  0.00            
ATOM   2112  HW2 HOH X 680      31.311   4.750  33.900  0.00  0.00            
ATOM   2113  OW  HOH X 681      31.386  -1.952  22.092  0.00  0.00            
ATOM   2114  HW1 HOH X 681      31.730  -2.765  21.721  0.00  0.00            
ATOM   2115  HW2 HOH X 681      31.714  -1.942  22.992  0.00  0.00            
ATOM   2116  OW  HOH X 682      16.946  11.045   9.776  0.00  0.00            
ATOM   2117  HW1 HOH X 682      16.661  11.624   9.069  0.00  0.00            
ATOM   2118  HW2 HOH X 682      16.133  10.748  10.184  0.00  0.00            
ATOM   2119  OW  HOH X 683      37.949  14.167  36.467  0.00  0.00            
ATOM   2120  HW1 HOH X 683      38.277  14.729  37.169  0.00  0.00            
ATOM   2121  HW2 HOH X 683      37.378  13.539  36.909  0.00  0.00            
ATOM   2122  OW  HOH X 684      41.494  12.441  29.713  0.00  0.00            
ATOM   2123  HW1 HOH X 684      41.965  13.085  30.241  0.00  0.00            
ATOM   2124  HW2 HOH X 684      40.604  12.789  29.646  0.00  0.00            
ATOM   2125  OW  HOH X 685      22.377   6.243   4.693  0.00  0.00            
ATOM   2126  HW1 HOH X 685      22.463   6.939   5.345  0.00  0.00            
ATOM   2127  HW2 HOH X 685      23.094   5.641   4.890  0.00  0.00            
ATOM   2128  OW  HOH X 686      15.095  -7.237   7.858  0.00  0.00            
ATOM   2129  HW1 HOH X 686      14.792  -7.068   6.966  0.00  0.00            
ATOM   2130  HW2 HOH X 686      14.293  -7.291   8.378  0.00  0.00            
ATOM   2131  OW  HOH X 687      32.583   2.912   7.844  0.00  0.00            
ATOM   2132  HW1 HOH X 687      32.269   3.489   8.540  0.00  0.00            
ATOM   2133  HW2 HOH X 687      33.275   2.395   8.254  0.00  0.00            
ATOM   2134  OW  HOH X 688      32.427  23.710  22.426  0.00  0.00            
ATOM   2135  HW1 HOH X 688      32.003  23.453  21.607  0.00  0.00            
ATOM   2136  HW2 HOH X 688      33.318  23.949  22.170  0.00  0.00            
ATOM   2137  OW  HOH X 689      33.191  14.819  16.794  0.00  0.00            
ATOM   2138  HW1 HOH X 689      33.497  14.744  15.891  0.00  0.00            
ATOM   2139  HW2 HOH X 689      33.974  14.677  17.326  0.00  0.00            
ATOM   2140  OW  HOH X 690      44.171  -7.542  29.814  0.00  0.00            
ATOM   2141  HW1 HOH X 690      44.885  -8.124  29.555  0.00  0.00            
ATOM   2142  HW2 HOH X 690      43.851  -7.173  28.991  0.00  0.00            
ATOM   2143  OW  HOH X 691      15.241  27.124  14.531  0.00  0.00            
ATOM   2144  HW1 HOH X 691      15.516  27.131  15.448  0.00  0.00            
ATOM   2145  HW2 HOH X 691      16.032  27.352  14.042  0.00  0.00            
ATOM   2146  OW  HOH X 692      39.595  20.965  32.601  0.00  0.00            
ATOM   2147  HW1 HOH X 692      39.514  20.133  32.134  0.00  0.00            
ATOM   2148  HW2 HOH X 692      39.424  20.745  33.516  0.00  0.00            
ATOM   2149  OW  HOH X 693      30.687  19.165  19.299  0.00  0.00            
ATOM   2150  HW1 HOH X 693      30.004  19.550  19.848  0.00  0.00            
ATOM   2151  HW2 HOH X 693      30.832  19.810  18.607  0.00  0.00            
ATOM   2152  OW  HOH X 694      27.988  10.810  35.540  0.00  0.00            
ATOM   2153  HW1 HOH X 694      27.129  10.971  35.149  0.00  0.00            
ATOM   2154  HW2 HOH X 694      28.143  11.571  36.099  0.00  0.00            
ATOM   2155  OW  HOH X 695      30.529  17.227  15.306  0.00  0.00            
ATOM   2156  HW1 HOH X 695      30.682  17.048  16.234  0.00  0.00            
ATOM   2157  HW2 HOH X 695      31.295  16.863  14.862  0.00  0.00            
ATOM   2158  OW  HOH X 696      14.498  12.006  15.701  0.00  0.00            
ATOM   2159  HW1 HOH X 696      13.987  12.660  15.225  0.00  0.00            
ATOM   2160  HW2 HOH X 696      14.961  11.519  15.019  0.00  0.00            
ATOM   2161  OW  HOH X 697      33.575  14.285  43.063  0.00  0.00            
ATOM   2162  HW1 HOH X 697      32.656  14.277  42.796  0.00  0.00            
ATOM   2163  HW2 HOH X 697      33.992  14.908  42.467  0.00  0.00            
ATOM   2164  OW  HOH X 698       7.638   7.227  17.964  0.00  0.00            
ATOM   2165  HW1 HOH X 698       7.745   8.150  18.194  0.00  0.00            
ATOM   2166  HW2 HOH X 698       6.814   7.195  17.478  0.00  0.00            
ATOM   2167  OW  HOH X 699      26.998   3.164   3.018  0.00  0.00            
ATOM   2168  HW1 HOH X 699      26.866   3.925   3.584  0.00  0.00            
ATOM   2169  HW2 HOH X 699      26.566   2.445   3.479  0.00  0.00            
ATOM   2170  OW  HOH X 700      48.097   9.463  14.009  0.00  0.00            
ATOM   2171  HW1 HOH X 700      47.814  10.046  14.713  0.00  0.00            
ATOM   2172  HW2 HOH X 700      48.655   8.817  14.441  0.00  0.00            
ATOM   2173  OW  HOH X 701      42.251   5.576  12.635  0.00  0.00            
ATOM   2174  HW1 HOH X 701      42.627   6.454  12.700  0.00  0.00            
ATOM   2175  HW2 HOH X 701      42.746   5.155  11.933  0.00  0.00            
ATOM   2176  OW  HOH X 702      26.500   7.097   7.209  0.00  0.00            
ATOM   2177  HW1 HOH X 702      26.624   6.700   8.072  0.00  0.00            
ATOM   2178  HW2 HOH X 702      25.666   7.561   7.276  0.00  0.00            
ATOM   2179  OW  HOH X 703      19.955  -7.270  14.701  0.00  0.00            
ATOM   2180  HW1 HOH X 703      19.077  -7.145  14.340  0.00  0.00            
ATOM   2181  HW2 HOH X 703      20.529  -7.287  13.935  0.00  0.00            
ATOM   2182  OW  HOH X 704      44.512  -2.057  20.772  0.00  0.00            
ATOM   2183  HW1 HOH X 704      45.401  -1.786  21.003  0.00  0.00            
ATOM   2184  HW2 HOH X 704      44.633  -2.824  20.212  0.00  0.00            
ATOM   2185  OW  HOH X 705      30.843  20.254  29.349  0.00  0.00            
ATOM   2186  HW1 HOH X 705      31.614  20.312  29.914  0.00  0.00            
ATOM   2187  HW2 HOH X 705      31.174  20.442  28.471  0.00  0.00            
ATOM   2188  OW  HOH X 706      18.000  11.782  31.450  0.00  0.00            
ATOM   2189  HW1 HOH X 706      18.885  11.976  31.143  0.00  0.00            
ATOM   2190  HW2 HOH X 706      18.120  11.478  32.350  0.00  0.00            
ATOM   2191  OW  HOH X 707      22.180  -1.747  21.003  0.00  0.00            
ATOM   2192  HW1 HOH X 707      21.489  -2.374  21.217  0.00  0.00            
ATOM   2193  HW2 HOH X 707      21.822  -0.898  21.262  0.00  0.00            
ATOM   2194  OW  HOH X 708      31.257  20.846  26.623  0.00  0.00            
ATOM   2195  HW1 HOH X 708      30.306  20.765  26.697  0.00  0.00            
ATOM   2196  HW2 HOH X 708      31.396  21.287  25.785  0.00  0.00            
ATOM   2197  OW  HOH X 709      39.019  -3.212  20.535  0.00  0.00            
ATOM   2198  HW1 HOH X 709      38.747  -2.967  19.651  0.00  0.00            
ATOM   2199  HW2 HOH X 709      39.968  -3.325  20.472  0.00  0.00            
ATOM   2200  OW  HOH X 710      28.888  20.753  21.091  0.00  0.00            
ATOM   2201  HW1 HOH X 710      28.550  20.082  21.683  0.00  0.00            
ATOM   2202  HW2 HOH X 710      28.335  20.687  20.312  0.00  0.00            
ATOM   2203  OW  HOH X 711      36.059  12.612  28.887  0.00  0.00            
ATOM   2204  HW1 HOH X 711      36.923  12.944  29.130  0.00  0.00            
ATOM   2205  HW2 HOH X 711      36.181  11.666  28.800  0.00  0.00            
ATOM   2206  OW  HOH X 712      15.355   7.559  16.884  0.00  0.00            
ATOM   2207  HW1 HOH X 712      14.680   7.359  16.236  0.00  0.00            
ATOM   2208  HW2 HOH X 712      15.010   8.312  17.365  0.00  0.00            
ATOM   2209  OW  HOH X 713      45.678   7.779  28.894  0.00  0.00            
ATOM   2210  HW1 HOH X 713      45.392   8.323  28.160  0.00  0.00            
ATOM   2211  HW2 HOH X 713      46.456   7.326  28.568  0.00  0.00            
ATOM   2212  OW  HOH X 714      30.838   5.963  16.600  0.00  0.00            
ATOM   2213  HW1 HOH X 714      31.691   5.575  16.798  0.00  0.00            
ATOM   2214  HW2 HOH X 714      30.313   5.802  17.384  0.00  0.00            
ATOM   2215  OW  HOH X 715      21.874   8.487  31.690  0.00  0.00            
ATOM   2216  HW1 HOH X 715      22.272   9.089  31.061  0.00  0.00            
ATOM   2217  HW2 HOH X 715      22.432   8.546  32.465  0.00  0.00            
ATOM   2218  OW  HOH X 716      12.159  22.357  18.974  0.00  0.00            
ATOM   2219  HW1 HOH X 716      12.714  22.656  19.694  0.00  0.00            
ATOM   2220  HW2 HOH X 716      12.042  21.421  19.133  0.00  0.00            
ATOM   2221  OW  HOH X 717      37.533  21.696  29.209  0.00  0.00            
ATOM   2222  HW1 HOH X 717      37.639  22.442  29.799  0.00  0.00            
ATOM   2223  HW2 HOH X 717      37.895  20.954  29.693  0.00  0.00            
ATOM   2224  OW  HOH X 718      17.591  -6.660   5.676  0.00  0.00            
ATOM   2225  HW1 HOH X 718      18.059  -7.303   6.208  0.00  0.00            
ATOM   2226  HW2 HOH X 718      16.752  -7.076   5.479  0.00  0.00            
ATOM   2227  OW  HOH X 719       8.500  10.528  15.795  0.00  0.00            
ATOM   2228  HW1 HOH X 719       8.494  11.476  15.661  0.00  0.00            
ATOM   2229  HW2 HOH X 719       8.287  10.415  16.721  0.00  0.00            
ATOM   2230  OW  HOH X 720      26.777   7.384  38.306  0.00  0.00            
ATOM   2231  HW1 HOH X 720      27.153   7.817  37.540  0.00  0.00            
ATOM   2232  HW2 HOH X 720      27.180   7.827  39.053  0.00  0.00            
ATOM   2233  OW  HOH X 721      19.515  20.065  17.471  0.00  0.00            
ATOM   2234  HW1 HOH X 721      19.248  20.540  16.685  0.00  0.00            
ATOM   2235  HW2 HOH X 721      18.714  19.988  17.989  0.00  0.00            
ATOM   2236  OW  HOH X 722      43.834   0.040  33.800  0.00  0.00            
ATOM   2237  HW1 HOH X 722      43.117   0.228  34.406  0.00  0.00            
ATOM   2238  HW2 HOH X 722      43.705  -0.875  33.552  0.00  0.00            
ATOM   2239  OW  HOH X 723      36.312   2.184  15.101  0.00  0.00            
ATOM   2240  HW1 HOH X 723      36.636   3.071  15.251  0.00  0.00            
ATOM   2241  HW2 HOH X 723      35.429   2.185  15.470  0.00  0.00            
ATOM   2242  OW  HOH X 724      26.422   0.253  33.360  0.00  0.00            
ATOM   2243  HW1 HOH X 724      26.707   1.165  33.425  0.00  0.00            
ATOM   2244  HW2 HOH X 724      25.476   0.307  33.223  0.00  0.00            
ATOM   2245  OW  HOH X 725      31.523  12.331  29.684  0.00  0.00            
ATOM   2246  HW1 HOH X 725      30.982  11.542  29.729  0.00  0.00            
ATOM   2247  HW2 HOH X 725      32.326  12.098  30.150  0.00  0.00            
ATOM   2248  OW  HOH X 726      49.650  18.435  20.938  0.00  0.00            
ATOM   2249  HW1 HOH X 726      49.055  18.638  20.217  0.00  0.00            
ATOM   2250  HW2 HOH X 726      50.041  19.277  21.172  0.00  0.00            
ATOM   2251  OW  HOH X 727      44.004  13.306  17.903  0.00  0.00            
ATOM   2252  HW1 HOH X 727      43.606  12.673  18.500  0.00  0.00            
ATOM   2253  HW2 HOH X 727      43.264  13.703  17.445  0.00  0.00            
ATOM   2254  OW  HOH X 728      21.210   7.950  -1.927  0.00  0.00            
ATOM   2255  HW1 HOH X 728      20.349   7.751  -2.295  0.00  0.00            
ATOM   2256  HW2 HOH X 728      21.063   7.996  -0.982  0.00  0.00            
ATOM   2257  OW  HOH X 729      27.110  12.547  13.230  0.00  0.00            
ATOM   2258  HW1 HOH X 729      26.227  12.802  12.965  0.00  0.00            
ATOM   2259  HW2 HOH X 729      27.017  12.276  14.144  0.00  0.00            
ATOM   2260  OW  HOH X 730      26.733   5.896   9.969  0.00  0.00            
ATOM   2261  HW1 HOH X 730      27.405   5.271  10.241  0.00  0.00            
ATOM   2262  HW2 HOH X 730      27.159   6.750  10.037  0.00  0.00            
ATOM   2263  OW  HOH X 731      44.817   4.529  25.526  0.00  0.00            
ATOM   2264  HW1 HOH X 731      45.489   3.864  25.678  0.00  0.00            
ATOM   2265  HW2 HOH X 731      44.811   5.052  26.328  0.00  0.00            
ATOM   2266  OW  HOH X 732      50.562  11.765  16.681  0.00  0.00            
ATOM   2267  HW1 HOH X 732      50.024  10.976  16.615  0.00  0.00            
ATOM   2268  HW2 HOH X 732      49.932  12.486  16.674  0.00  0.00            
ATOM   2269  OW  HOH X 733      41.869  14.808  31.420  0.00  0.00            
ATOM   2270  HW1 HOH X 733      42.485  15.410  31.837  0.00  0.00            
ATOM   2271  HW2 HOH X 733      41.028  15.264  31.453  0.00  0.00            
ATOM   2272  OW  HOH X 734      34.738  -0.905  24.942  0.00  0.00            
ATOM   2273  HW1 HOH X 734      34.546   0.030  24.866  0.00  0.00            
ATOM   2274  HW2 HOH X 734      35.692  -0.949  25.012  0.00  0.00            
ATOM   2275  OW  HOH X 735      38.180   1.937  22.190  0.00  0.00            
ATOM   2276  HW1 HOH X 735      38.956   2.164  22.702  0.00  0.00            
ATOM   2277  HW2 HOH X 735      38.521   1.445  21.443  0.00  0.00            
ATOM   2278  OW  HOH X 736      41.042  21.822  25.739  0.00  0.00            
ATOM   2279  HW1 HOH X 736      41.491  21.109  26.193  0.00  0.00            
ATOM   2280  HW2 HOH X 736      41.042  22.544  26.367  0.00  0.00            
ATOM   2281  OW  HOH X 737      16.977  13.586  23.714  0.00  0.00            
ATOM   2282  HW1 HOH X 737      16.064  13.693  23.980  0.00  0.00            
ATOM   2283  HW2 HOH X 737      17.484  13.922  24.453  0.00  0.00            
ATOM   2284  OW  HOH X 738      21.619  25.557  19.536  0.00  0.00            
ATOM   2285  HW1 HOH X 738      20.664  25.504  19.554  0.00  0.00            
ATOM   2286  HW2 HOH X 738      21.805  26.419  19.162  0.00  0.00            
ATOM   2287  OW  HOH X 739       9.268   4.417  23.108  0.00  0.00            
ATOM   2288  HW1 HOH X 739       8.498   4.949  23.310  0.00  0.00            
ATOM   2289  HW2 HOH X 739      10.003   5.028  23.166  0.00  0.00            
ATOM   2290  OW  HOH X 740      17.567   5.199  11.868  0.00  0.00            
ATOM   2291  HW1 HOH X 740      16.662   4.889  11.870  0.00  0.00            
ATOM   2292  HW2 HOH X 740      17.530   6.045  11.421  0.00  0.00            
ATOM   2293  OW  HOH X 741      13.322  18.926  11.296  0.00  0.00            
ATOM   2294  HW1 HOH X 741      12.390  19.098  11.431  0.00  0.00            
ATOM   2295  HW2 HOH X 741      13.754  19.341  12.042  0.00  0.00            
ATOM   2296  OW  HOH X 742      36.295  14.148  10.510  0.00  0.00            
ATOM   2297  HW1 HOH X 742      37.038  13.574  10.698  0.00  0.00            
ATOM   2298  HW2 HOH X 742      36.679  14.892  10.046  0.00  0.00            
ATOM   2299  OW  HOH X 743      40.530   1.350  14.979  0.00  0.00            
ATOM   2300  HW1 HOH X 743      40.514   2.233  15.348  0.00  0.00            
ATOM   2301  HW2 HOH X 743      39.678   0.979  15.210  0.00  0.00            
ATOM   2302  OW  HOH X 744      30.397  22.984  17.989  0.00  0.00            
ATOM   2303  HW1 HOH X 744      29.938  22.264  17.556  0.00  0.00            
ATOM   2304  HW2 HOH X 744      30.138  23.763  17.497  0.00  0.00            
ATOM   2305  OW  HOH X 745      28.435   8.243   9.541  0.00  0.00            
ATOM   2306  HW1 HOH X 745      28.885   8.912  10.058  0.00  0.00            
ATOM   2307  HW2 HOH X 745      27.816   8.734   9.001  0.00  0.00            
ATOM   2308  OW  HOH X 746      22.317  21.075  14.824  0.00  0.00            
ATOM   2309  HW1 HOH X 746      21.457  20.677  14.684  0.00  0.00            
ATOM   2310  HW2 HOH X 746      22.327  21.304  15.753  0.00  0.00            
ATOM   2311  OW  HOH X 747      23.915   8.157  40.581  0.00  0.00            
ATOM   2312  HW1 HOH X 747      24.587   7.997  41.243  0.00  0.00            
ATOM   2313  HW2 HOH X 747      24.389   8.546  39.846  0.00  0.00            
ATOM   2314  OW  HOH X 748      18.078  10.494  33.923  0.00  0.00            
ATOM   2315  HW1 HOH X 748      17.640   9.732  34.302  0.00  0.00            
ATOM   2316  HW2 HOH X 748      19.003  10.369  34.135  0.00  0.00            
ATOM   2317  OW  HOH X 749      17.336   3.681  15.349  0.00  0.00            
ATOM   2318  HW1 HOH X 749      16.491   4.088  15.541  0.00  0.00            
ATOM   2319  HW2 HOH X 749      17.119   2.926  14.801  0.00  0.00            
ATOM   2320  OW  HOH X 750      42.874   4.589  34.924  0.00  0.00            
ATOM   2321  HW1 HOH X 750      43.784   4.308  34.829  0.00  0.00            
ATOM   2322  HW2 HOH X 750      42.824   4.942  35.812  0.00  0.00            
ATOM   2323  OW  HOH X 751      27.441  15.705   7.284  0.00  0.00            
ATOM   2324  HW1 HOH X 751      27.860  16.561   7.372  0.00  0.00            
ATOM   2325  HW2 HOH X 751      26.734  15.716   7.928  0.00  0.00            
ATOM   2326  OW  HOH X 752      27.736  10.494   8.004  0.00  0.00            
ATOM   2327  HW1 HOH X 752      28.154  11.354   7.959  0.00  0.00            
ATOM   2328  HW2 HOH X 752      28.092  10.015   7.256  0.00  0.00            
ATOM   2329  OW  HOH X 753      18.145   8.488  16.886  0.00  0.00            
ATOM   2330  HW1 HOH X 753      18.453   7.721  17.369  0.00  0.00            
ATOM   2331  HW2 HOH X 753      17.191   8.448  16.955  0.00  0.00            
ATOM   2332  OW  HOH X 754      20.884   2.230  14.001  0.00  0.00            
ATOM   2333  HW1 HOH X 754      21.766   2.596  14.074  0.00  0.00            
ATOM   2334  HW2 HOH X 754      20.457   2.764  13.331  0.00  0.00            
ATOM   2335  OW  HOH X 755      34.420  21.984  15.964  0.00  0.00            
ATOM   2336  HW1 HOH X 755      34.968  22.566  15.436  0.00  0.00            
ATOM   2337  HW2 HOH X 755      34.978  21.227  16.143  0.00  0.00            
ATOM   2338  OW  HOH X 756      24.680  22.945  21.425  0.00  0.00            
ATOM   2339  HW1 HOH X 756      24.054  23.596  21.740  0.00  0.00            
ATOM   2340  HW2 HOH X 756      25.286  22.821  22.155  0.00  0.00            
ATOM   2341  OW  HOH X 757      16.339  24.068  16.604  0.00  0.00            
ATOM   2342  HW1 HOH X 757      16.185  23.946  17.541  0.00  0.00            
ATOM   2343  HW2 HOH X 757      16.278  25.014  16.472  0.00  0.00            
ATOM   2344  OW  HOH X 758      40.319  17.031  26.605  0.00  0.00            
ATOM   2345  HW1 HOH X 758      39.398  16.956  26.355  0.00  0.00            
ATOM   2346  HW2 HOH X 758      40.732  17.477  25.865  0.00  0.00            
ATOM   2347  OW  HOH X 759      28.954  10.005  11.274  0.00  0.00            
ATOM   2348  HW1 HOH X 759      29.367  10.868  11.263  0.00  0.00            
ATOM   2349  HW2 HOH X 759      28.228  10.093  11.891  0.00  0.00            
ATOM   2350  OW  HOH X 760      48.704  13.784  16.740  0.00  0.00            
ATOM   2351  HW1 HOH X 760      48.686  14.341  17.518  0.00  0.00            
ATOM   2352  HW2 HOH X 760      47.799  13.779  16.428  0.00  0.00            
ATOM   2353  OW  HOH X 761      26.983  -7.783  13.833  0.00  0.00            
ATOM   2354  HW1 HOH X 761      26.753  -6.868  13.998  0.00  0.00            
ATOM   2355  HW2 HOH X 761      27.762  -7.739  13.280  0.00  0.00            
ATOM   2356  OW  HOH X 762      46.515   2.678  27.523  0.00  0.00            
ATOM   2357  HW1 HOH X 762      46.885   2.697  26.641  0.00  0.00            
ATOM   2358  HW2 HOH X 762      46.109   1.814  27.595  0.00  0.00            
ATOM   2359  OW  HOH X 763      42.328  10.166  24.575  0.00  0.00            
ATOM   2360  HW1 HOH X 763      42.436  10.679  25.376  0.00  0.00            
ATOM   2361  HW2 HOH X 763      42.378   9.255  24.865  0.00  0.00            
ATOM   2362  OW  HOH X 764      28.602  20.670  31.219  0.00  0.00            
ATOM   2363  HW1 HOH X 764      29.147  20.070  30.711  0.00  0.00            
ATOM   2364  HW2 HOH X 764      28.333  20.161  31.984  0.00  0.00            
ATOM   2365  OW  HOH X 765      15.864   9.729   5.284  0.00  0.00            
ATOM   2366  HW1 HOH X 765      16.493   9.251   4.745  0.00  0.00            
ATOM   2367  HW2 HOH X 765      15.032   9.640   4.819  0.00  0.00            
ATOM   2368  OW  HOH X 766      20.446   8.444   1.053  0.00  0.00            
ATOM   2369  HW1 HOH X 766      20.897   9.233   0.753  0.00  0.00            
ATOM   2370  HW2 HOH X 766      21.080   8.009   1.624  0.00  0.00            
ATOM   2371  OW  HOH X 767      11.069  15.942  16.260  0.00  0.00            
ATOM   2372  HW1 HOH X 767      11.321  15.030  16.115  0.00  0.00            
ATOM   2373  HW2 HOH X 767      11.404  16.408  15.494  0.00  0.00            
ATOM   2374  OW  HOH X 768      31.795  21.499  23.996  0.00  0.00            
ATOM   2375  HW1 HOH X 768      31.980  22.052  23.238  0.00  0.00            
ATOM   2376  HW2 HOH X 768      32.542  20.902  24.045  0.00  0.00            
ATOM   2377  OW  HOH X 769      25.244  19.807  24.241  0.00  0.00            
ATOM   2378  HW1 HOH X 769      25.772  19.961  25.025  0.00  0.00            
ATOM   2379  HW2 HOH X 769      24.448  20.319  24.383  0.00  0.00            
ATOM   2380  OW  HOH X 770      22.202  11.566   2.546  0.00  0.00            
ATOM   2381  HW1 HOH X 770      22.584  10.852   3.057  0.00  0.00            
ATOM   2382  HW2 HOH X 770      22.100  11.204   1.666  0.00  0.00            
ATOM   2383  OW  HOH X 771      25.067  24.656  25.833  0.00  0.00            
ATOM   2384  HW1 HOH X 771      25.859  24.637  26.371  0.00  0.00            
ATOM   2385  HW2 HOH X 771      25.389  24.619  24.932  0.00  0.00            
ATOM   2386  OW  HOH X 772      25.209  14.682  34.622  0.00  0.00            
ATOM   2387  HW1 HOH X 772      24.627  14.965  35.328  0.00  0.00            
ATOM   2388  HW2 HOH X 772      24.698  14.810  33.823  0.00  0.00            
ATOM   2389  OW  HOH X 773      34.001  20.245  26.821  0.00  0.00            
ATOM   2390  HW1 HOH X 773      33.080  20.504  26.804  0.00  0.00            
ATOM   2391  HW2 HOH X 773      34.464  21.025  27.126  0.00  0.00            
ATOM   2392  OW  HOH X 774      10.208   0.973  19.179  0.00  0.00            
ATOM   2393  HW1 HOH X 774      10.373   1.435  18.357  0.00  0.00            
ATOM   2394  HW2 HOH X 774      10.538   1.562  19.857  0.00  0.00            
ATOM   2395  OW  HOH X 775      40.797   5.578  24.159  0.00  0.00            
ATOM   2396  HW1 HOH X 775      39.963   5.135  24.315  0.00  0.00            
ATOM   2397  HW2 HOH X 775      41.457   4.968  24.486  0.00  0.00            
ATOM   2398  OW  HOH X 776      38.543  21.281  26.663  0.00  0.00            
ATOM   2399  HW1 HOH X 776      39.423  21.365  26.295  0.00  0.00            
ATOM   2400  HW2 HOH X 776      38.654  21.461  27.596  0.00  0.00            
ATOM   2401  OW  HOH X 777      26.775   7.399  41.718  0.00  0.00            
ATOM   2402  HW1 HOH X 777      26.863   7.965  42.485  0.00  0.00            
ATOM   2403  HW2 HOH X 777      27.326   6.641  41.913  0.00  0.00            
ATOM   2404  OW  HOH X 778      19.556  -2.247  22.098  0.00  0.00            
ATOM   2405  HW1 HOH X 778      19.133  -2.691  22.834  0.00  0.00            
ATOM   2406  HW2 HOH X 778      19.975  -1.481  22.490  0.00  0.00            
ATOM   2407  OW  HOH X 779      27.672  14.947  35.992  0.00  0.00            
ATOM   2408  HW1 HOH X 779      26.962  14.727  35.390  0.00  0.00            
ATOM   2409  HW2 HOH X 779      27.630  15.900  36.076  0.00  0.00            
ATOM   2410  OW  HOH X 780      20.688  -8.554  17.149  0.00  0.00            
ATOM   2411  HW1 HOH X 780      20.208  -8.021  16.515  0.00  0.00            
ATOM   2412  HW2 HOH X 780      20.324  -9.433  17.047  0.00  0.00            
ATOM   2413  OW  HOH X 781      18.847   3.867  30.845  0.00  0.00            
ATOM   2414  HW1 HOH X 781      18.172   4.050  31.498  0.00  0.00            
ATOM   2415  HW2 HOH X 781      19.379   4.663  30.820  0.00  0.00            
ATOM   2416  OW  HOH X 782       9.684   8.265  14.729  0.00  0.00            
ATOM   2417  HW1 HOH X 782       9.854   8.110  15.659  0.00  0.00            
ATOM   2418  HW2 HOH X 782       9.357   9.163  14.691  0.00  0.00            
ATOM   2419  OW  HOH X 783      28.063  -9.656  17.330  0.00  0.00            
ATOM   2420  HW1 HOH X 783      28.223  -9.491  16.401  0.00  0.00            
ATOM   2421  HW2 HOH X 783      28.593  -9.002  17.785  0.00  0.00            
ATOM   2422  OW  HOH X 784      41.341  -4.413  25.143  0.00  0.00            
ATOM   2423  HW1 HOH X 784      41.926  -3.846  24.640  0.00  0.00            
ATOM   2424  HW2 HOH X 784      40.518  -4.402  24.656  0.00  0.00            
ATOM   2425  OW  HOH X 785      34.431   3.641  31.268  0.00  0.00            
ATOM   2426  HW1 HOH X 785      33.481   3.754  31.242  0.00  0.00            
ATOM   2427  HW2 HOH X 785      34.727   4.253  31.942  0.00  0.00            
ATOM   2428  OW  HOH X 786      39.363  18.057  22.646  0.00  0.00            
ATOM   2429  HW1 HOH X 786      38.890  17.416  22.115  0.00  0.00            
ATOM   2430  HW2 HOH X 786      39.955  18.489  22.030  0.00  0.00            
ATOM   2431  OW  HOH X 787      29.917   4.686   5.842  0.00  0.00            
ATOM   2432  HW1 HOH X 787      29.115   4.837   5.342  0.00  0.00            
ATOM   2433  HW2 HOH X 787      29.848   5.277   6.592  0.00  0.00            
ATOM   2434  OW  HOH X 788      21.737  15.805  22.671  0.00  0.00            
ATOM   2435  HW1 HOH X 788      22.349  16.536  22.586  0.00  0.00            
ATOM   2436  HW2 HOH X 788      21.061  16.126  23.267  0.00  0.00            
ATOM   2437  OW  HOH X 789      28.413   5.102  41.982  0.00  0.00            
ATOM   2438  HW1 HOH X 789      27.867   4.493  42.478  0.00  0.00            
ATOM   2439  HW2 HOH X 789      28.704   4.599  41.221  0.00  0.00            
ATOM   2440  OW  HOH X 790      45.511   7.505  18.938  0.00  0.00            
ATOM   2441  HW1 HOH X 790      45.044   8.336  18.861  0.00  0.00            
ATOM   2442  HW2 HOH X 790      45.557   7.342  19.880  0.00  0.00            
ATOM   2443  OW  HOH X 791      27.451   9.923  39.761  0.00  0.00            
ATOM   2444  HW1 HOH X 791      28.215  10.042  39.197  0.00  0.00            
ATOM   2445  HW2 HOH X 791      27.813   9.613  40.591  0.00  0.00            
ATOM   2446  OW  HOH X 792      40.576  20.471  28.675  0.00  0.00            
ATOM   2447  HW1 HOH X 792      40.388  19.663  29.154  0.00  0.00            
ATOM   2448  HW2 HOH X 792      41.307  20.244  28.100  0.00  0.00            
ATOM   2449  OW  HOH X 793      20.582  13.539  21.967  0.00  0.00            
ATOM   2450  HW1 HOH X 793      20.974  14.381  22.196  0.00  0.00            
ATOM   2451  HW2 HOH X 793      21.320  12.930  21.937  0.00  0.00            
ATOM   2452  OW  HOH X 794      32.201  14.234  24.620  0.00  0.00            
ATOM   2453  HW1 HOH X 794      31.342  13.817  24.553  0.00  0.00            
ATOM   2454  HW2 HOH X 794      32.589  13.857  25.409  0.00  0.00            
ATOM   2455  OW  HOH X 795      25.647  -0.752  13.681  0.00  0.00            
ATOM   2456  HW1 HOH X 795      24.749  -1.004  13.896  0.00  0.00            
ATOM   2457  HW2 HOH X 795      26.173  -1.519  13.910  0.00  0.00            
ATOM   2458  OW  HOH X 796      26.445  10.824   2.423  0.00  0.00            
ATOM   2459  HW1 HOH X 796      25.935  10.671   3.218  0.00  0.00            
ATOM   2460  HW2 HOH X 796      27.262  11.214   2.734  0.00  0.00            
ATOM   2461  OW  HOH X 797      33.018   9.788  27.093  0.00  0.00            
ATOM   2462  HW1 HOH X 797      33.887   9.550  27.415  0.00  0.00            
ATOM   2463  HW2 HOH X 797      32.426   9.167  27.518  0.00  0.00            
ATOM   2464  OW  HOH X 798      25.111   9.334  13.313  0.00  0.00            
ATOM   2465  HW1 HOH X 798      24.617   9.622  14.081  0.00  0.00            
ATOM   2466  HW2 HOH X 798      24.442   9.094  12.673  0.00  0.00            
ATOM   2467  OW  HOH X 799      43.772  11.367  28.730  0.00  0.00            
ATOM   2468  HW1 HOH X 799      44.378  11.960  29.176  0.00  0.00            
ATOM   2469  HW2 HOH X 799      42.905  11.643  29.027  0.00  0.00            
ATOM   2470  OW  HOH X 800      46.946  -6.257  27.563  0.00  0.00            
ATOM   2471  HW1 HOH X 800      46.761  -6.827  26.817  0.00  0.00            
ATOM   2472  HW2 HOH X 800      46.566  -5.413  27.319  0.00  0.00            
ATOM   2473  OW  HOH X 801      25.910  19.116  28.799  0.00  0.00            
ATOM   2474  HW1 HOH X 801      26.188  20.022  28.931  0.00  0.00            
ATOM   2475  HW2 HOH X 801      26.723  18.636  28.641  0.00  0.00            
ATOM   2476  OW  HOH X 802      22.595   1.799   2.382  0.00  0.00            
ATOM   2477  HW1 HOH X 802      22.872   1.617   3.280  0.00  0.00            
ATOM   2478  HW2 HOH X 802      22.631   0.949   1.943  0.00  0.00            
ATOM   2479  OW  HOH X 803      21.283   4.997  28.314  0.00  0.00            
ATOM   2480  HW1 HOH X 803      21.608   5.878  28.133  0.00  0.00            
ATOM   2481  HW2 HOH X 803      20.651   4.826  27.615  0.00  0.00            
ATOM   2482  OW  HOH X 804      18.328  24.181  10.927  0.00  0.00            
ATOM   2483  HW1 HOH X 804      18.173  24.292  11.865  0.00  0.00            
ATOM   2484  HW2 HOH X 804      17.855  23.381  10.699  0.00  0.00            
ATOM   2485  OW  HOH X 805      46.540  10.046  25.529  0.00  0.00            
ATOM   2486  HW1 HOH X 805      45.685   9.905  25.935  0.00  0.00            
ATOM   2487  HW2 HOH X 805      46.955   9.184  25.537  0.00  0.00            
ATOM   2488  OW  HOH X 806      22.405   6.656   2.107  0.00  0.00            
ATOM   2489  HW1 HOH X 806      22.607   5.896   1.562  0.00  0.00            
ATOM   2490  HW2 HOH X 806      22.356   6.307   2.997  0.00  0.00            
ATOM   2491  OW  HOH X 807      41.801  -5.419  35.297  0.00  0.00            
ATOM   2492  HW1 HOH X 807      41.089  -6.032  35.480  0.00  0.00            
ATOM   2493  HW2 HOH X 807      41.849  -5.384  34.341  0.00  0.00            
ATOM   2494  OW  HOH X 808      30.412   6.896  11.927  0.00  0.00            
ATOM   2495  HW1 HOH X 808      30.910   6.607  11.162  0.00  0.00            
ATOM   2496  HW2 HOH X 808      30.244   7.824  11.767  0.00  0.00            
ATOM   2497  OW  HOH X 809      47.038  17.356  20.087  0.00  0.00            
ATOM   2498  HW1 HOH X 809      46.239  16.891  20.334  0.00  0.00            
ATOM   2499  HW2 HOH X 809      47.727  16.694  20.140  0.00  0.00            
ATOM   2500  OW  HOH X 810      22.836  11.289  22.251  0.00  0.00            
ATOM   2501  HW1 HOH X 810      22.963  11.964  22.918  0.00  0.00            
ATOM   2502  HW2 HOH X 810      23.681  10.843  22.196  0.00  0.00            
ATOM   2503  OW  HOH X 811      49.745   2.488  20.553  0.00  0.00            
ATOM   2504  HW1 HOH X 811      50.189   3.320  20.387  0.00  0.00            
ATOM   2505  HW2 HOH X 811      49.324   2.271  19.722  0.00  0.00            
ATOM   2506  OW  HOH X 812      41.518  15.141  24.301  0.00  0.00            
ATOM   2507  HW1 HOH X 812      41.065  15.913  24.640  0.00  0.00            
ATOM   2508  HW2 HOH X 812      42.329  15.484  23.925  0.00  0.00            
ATOM   2509  OW  HOH X 813      38.967  16.433  35.280  0.00  0.00            
ATOM   2510  HW1 HOH X 813      38.168  16.899  35.525  0.00  0.00            
ATOM   2511  HW2 HOH X 813      38.793  15.521  35.514  0.00  0.00            
ATOM   2512  OW  HOH X 814      26.327   1.606  12.732  0.00  0.00            
ATOM   2513  HW1 HOH X 814      26.138   0.755  13.127  0.00  0.00            
ATOM   2514  HW2 HOH X 814      25.672   1.700  12.040  0.00  0.00            
ATOM   2515  OW  HOH X 815      14.435  13.822  24.436  0.00  0.00            
ATOM   2516  HW1 HOH X 815      13.867  13.262  23.906  0.00  0.00            
ATOM   2517  HW2 HOH X 815      13.911  14.032  25.209  0.00  0.00            
ATOM   2518  OW  HOH X 816      22.752   4.598  36.300  0.00  0.00            
ATOM   2519  HW1 HOH X 816      21.817   4.789  36.381  0.00  0.00            
ATOM   2520  HW2 HOH X 816      22.938   3.999  37.024  0.00  0.00            
ATOM   2521  OW  HOH X 817      45.704  -0.811  30.034  0.00  0.00            
ATOM   2522  HW1 HOH X 817      45.058  -0.453  30.643  0.00  0.00            
ATOM   2523  HW2 HOH X 817      45.646  -1.759  30.152  0.00  0.00            
ATOM   2524  OW  HOH X 818      13.862  19.646  13.870  0.00  0.00            
ATOM   2525  HW1 HOH X 818      13.405  19.692  14.709  0.00  0.00            
ATOM   2526  HW2 HOH X 818      14.777  19.490  14.103  0.00  0.00            
ATOM   2527  OW  HOH X 819      19.626   1.233  31.107  0.00  0.00            
ATOM   2528  HW1 HOH X 819      20.541   1.223  31.388  0.00  0.00            
ATOM   2529  HW2 HOH X 819      19.409   2.162  31.028  0.00  0.00            
ATOM   2530  OW  HOH X 820      40.705  10.831  27.849  0.00  0.00            
ATOM   2531  HW1 HOH X 820      40.408  11.359  27.107  0.00  0.00            
ATOM   2532  HW2 HOH X 820      40.978  11.472  28.505  0.00  0.00            
ATOM   2533  OW  HOH X 821      31.902   3.788  22.801  0.00  0.00            
ATOM   2534  HW1 HOH X 821      32.834   3.666  22.986  0.00  0.00            
ATOM   2535  HW2 HOH X 821      31.530   4.089  23.629  0.00  0.00            
ATOM   2536  OW  HOH X 822      39.940   4.962  14.575  0.00  0.00            
ATOM   2537  HW1 HOH X 822      40.451   4.858  15.378  0.00  0.00            
ATOM   2538  HW2 HOH X 822      40.596   5.078  13.887  0.00  0.00            
ATOM   2539  OW  HOH X 823      43.485   4.344  17.780  0.00  0.00            
ATOM   2540  HW1 HOH X 823      44.055   3.576  17.738  0.00  0.00            
ATOM   2541  HW2 HOH X 823      43.840   4.943  17.124  0.00  0.00            
ATOM   2542  OW  HOH X 824      13.517  18.930   8.404  0.00  0.00            
ATOM   2543  HW1 HOH X 824      13.805  18.056   8.140  0.00  0.00            
ATOM   2544  HW2 HOH X 824      13.111  18.800   9.261  0.00  0.00            
ATOM   2545  OW  HOH X 825      18.978  -2.987  18.027  0.00  0.00            
ATOM   2546  HW1 HOH X 825      19.334  -3.844  18.260  0.00  0.00            
ATOM   2547  HW2 HOH X 825      18.463  -2.724  18.790  0.00  0.00            
ATOM   2548  OW  HOH X 826      11.988   3.332  19.018  0.00  0.00            
ATOM   2549  HW1 HOH X 826      12.864   3.375  19.403  0.00  0.00            
ATOM   2550  HW2 HOH X 826      11.999   3.991  18.325  0.00  0.00            
ATOM   2551  OW  HOH X 827      28.025  22.995  15.717  0.00  0.00            
ATOM   2552  HW1 HOH X 827      28.634  23.520  15.198  0.00  0.00            
ATOM   2553  HW2 HOH X 827      27.540  22.481  15.070  0.00  0.00            
ATOM   2554  OW  HOH X 828      26.924  21.669  29.053  0.00  0.00            
ATOM   2555  HW1 HOH X 828      27.400  21.471  29.859  0.00  0.00            
ATOM   2556  HW2 HOH X 828      26.575  22.550  29.190  0.00  0.00            
ATOM   2557  OW  HOH X 829      16.728   1.951   6.134  0.00  0.00            
ATOM   2558  HW1 HOH X 829      17.096   1.427   6.845  0.00  0.00            
ATOM   2559  HW2 HOH X 829      16.128   1.357   5.683  0.00  0.00            
ATOM   2560  OW  HOH X 830      34.273  16.223  38.093  0.00  0.00            
ATOM   2561  HW1 HOH X 830      34.565  16.341  37.189  0.00  0.00            
ATOM   2562  HW2 HOH X 830      33.960  17.087  38.359  0.00  0.00            
ATOM   2563  OW  HOH X 831      28.118   3.700  11.791  0.00  0.00            
ATOM   2564  HW1 HOH X 831      27.770   3.161  12.501  0.00  0.00            
ATOM   2565  HW2 HOH X 831      29.052   3.495  11.769  0.00  0.00            
ATOM   2566  OW  HOH X 832      30.085   5.842  28.711  0.00  0.00            
ATOM   2567  HW1 HOH X 832      29.574   5.944  27.908  0.00  0.00            
ATOM   2568  HW2 HOH X 832      30.129   4.896  28.850  0.00  0.00            
ATOM   2569  OW  HOH X 833      22.040  -2.755   5.586  0.00  0.00            
ATOM   2570  HW1 HOH X 833      21.938  -1.804   5.614  0.00  0.00            
ATOM   2571  HW2 HOH X 833      21.179  -3.096   5.828  0.00  0.00            
ATOM   2572  OW  HOH X 834      34.576  21.822  18.913  0.00  0.00            
ATOM   2573  HW1 HOH X 834      34.178  21.171  18.336  0.00  0.00            
ATOM   2574  HW2 HOH X 834      35.458  21.489  19.078  0.00  0.00            
ATOM   2575  OW  HOH X 835      36.326  -7.624  21.941  0.00  0.00            
ATOM   2576  HW1 HOH X 835      37.166  -8.072  21.841  0.00  0.00            
ATOM   2577  HW2 HOH X 835      36.084  -7.770  22.855  0.00  0.00            
ATOM   2578  OW  HOH X 836      40.317  -0.417  31.598  0.00  0.00            
ATOM   2579  HW1 HOH X 836      40.868  -0.774  30.901  0.00  0.00            
ATOM   2580  HW2 HOH X 836      39.421  -0.564  31.294  0.00  0.00            
ATOM   2581  OW  HOH X 837      17.178  -4.187  10.436  0.00  0.00            
ATOM   2582  HW1 HOH X 837      18.000  -3.787  10.720  0.00  0.00            
ATOM   2583  HW2 HOH X 837      16.924  -3.688   9.660  0.00  0.00            
ATOM   2584  OW  HOH X 838      38.976   7.649  20.895  0.00  0.00            
ATOM   2585  HW1 HOH X 838      39.362   8.381  21.375  0.00  0.00            
ATOM   2586  HW2 HOH X 838      38.178   8.010  20.508  0.00  0.00            
ATOM   2587  OW  HOH X 839      41.411  -5.021  32.681  0.00  0.00            
ATOM   2588  HW1 HOH X 839      41.115  -4.223  33.118  0.00  0.00            
ATOM   2589  HW2 HOH X 839      41.227  -4.870  31.754  0.00  0.00            
ATOM   2590  OW  HOH X 840      36.021  15.468  30.435  0.00  0.00            
ATOM   2591  HW1 HOH X 840      36.244  15.358  31.360  0.00  0.00            
ATOM   2592  HW2 HOH X 840      36.821  15.230  29.966  0.00  0.00            
ATOM   2593  OW  HOH X 841      38.091  17.130  25.019  0.00  0.00            
ATOM   2594  HW1 HOH X 841      37.698  17.978  25.227  0.00  0.00            
ATOM   2595  HW2 HOH X 841      38.550  17.275  24.192  0.00  0.00            
ATOM   2596  OW  HOH X 842      29.496   4.818  33.912  0.00  0.00            
ATOM   2597  HW1 HOH X 842      29.059   4.018  34.206  0.00  0.00            
ATOM   2598  HW2 HOH X 842      29.301   4.867  32.976  0.00  0.00            
ATOM   2599  OW  HOH X 843      46.105   8.381  11.497  0.00  0.00            
ATOM   2600  HW1 HOH X 843      45.207   8.564  11.222  0.00  0.00            
ATOM   2601  HW2 HOH X 843      46.139   8.665  12.411  0.00  0.00            
ATOM   2602  OW  HOH X 844      15.316   0.340  17.775  0.00  0.00            
ATOM   2603  HW1 HOH X 844      14.701   1.066  17.673  0.00  0.00            
ATOM   2604  HW2 HOH X 844      15.699   0.225  16.906  0.00  0.00            
ATOM   2605  OW  HOH X 845      35.745  10.120   4.767  0.00  0.00            
ATOM   2606  HW1 HOH X 845      36.688  10.083   4.606  0.00  0.00            
ATOM   2607  HW2 HOH X 845      35.663  10.559   5.614  0.00  0.00            
ATOM   2608  OW  HOH X 846      44.408  22.553  25.660  0.00  0.00            
ATOM   2609  HW1 HOH X 846      43.666  22.229  25.149  0.00  0.00            
ATOM   2610  HW2 HOH X 846      44.025  23.190  26.263  0.00  0.00            
ATOM   2611  OW  HOH X 847      28.393  -7.710  22.916  0.00  0.00            
ATOM   2612  HW1 HOH X 847      29.282  -7.960  23.170  0.00  0.00            
ATOM   2613  HW2 HOH X 847      27.984  -8.529  22.635  0.00  0.00            
ATOM   2614  OW  HOH X 848      41.863  -1.139  20.585  0.00  0.00            
ATOM   2615  HW1 HOH X 848      41.745  -1.507  19.709  0.00  0.00            
ATOM   2616  HW2 HOH X 848      42.764  -1.360  20.819  0.00  0.00            
ATOM   2617  OW  HOH X 849      34.262   6.236  42.427  0.00  0.00            
ATOM   2618  HW1 HOH X 849      35.147   6.374  42.088  0.00  0.00            
ATOM   2619  HW2 HOH X 849      33.687   6.581  41.744  0.00  0.00            
ATOM   2620  OW  HOH X 850       6.908   4.996  25.113  0.00  0.00            
ATOM   2621  HW1 HOH X 850       6.268   5.562  25.544  0.00  0.00            
ATOM   2622  HW2 HOH X 850       6.562   4.873  24.229  0.00  0.00            
ATOM   2623  OW  HOH X 851      34.271  10.151  30.209  0.00  0.00            
ATOM   2624  HW1 HOH X 851      35.192  10.011  29.987  0.00  0.00            
ATOM   2625  HW2 HOH X 851      33.888   9.274  30.208  0.00  0.00            
ATOM   2626  OW  HOH X 852      26.124   7.303  33.052  0.00  0.00            
ATOM   2627  HW1 HOH X 852      25.554   8.069  32.976  0.00  0.00            
ATOM   2628  HW2 HOH X 852      25.607   6.668  33.547  0.00  0.00            
ATOM   2629  OW  HOH X 853      30.380  16.602  18.060  0.00  0.00            
ATOM   2630  HW1 HOH X 853      29.609  16.267  18.518  0.00  0.00            
ATOM   2631  HW2 HOH X 853      30.597  17.414  18.518  0.00  0.00            
ATOM   2632  OW  HOH X 854      24.067  14.049  30.145  0.00  0.00            
ATOM   2633  HW1 HOH X 854      24.447  14.590  29.452  0.00  0.00            
ATOM   2634  HW2 HOH X 854      23.730  13.278  29.689  0.00  0.00            
ATOM   2635  OW  HOH X 855      28.010   2.601  38.065  0.00  0.00            
ATOM   2636  HW1 HOH X 855      27.545   1.768  37.990  0.00  0.00            
ATOM   2637  HW2 HOH X 855      28.923   2.384  37.880  0.00  0.00            
ATOM   2638  OW  HOH X 856      13.096  -0.245  21.450  0.00  0.00            
ATOM   2639  HW1 HOH X 856      13.902   0.256  21.575  0.00  0.00            
ATOM   2640  HW2 HOH X 856      12.421   0.273  21.888  0.00  0.00            
ATOM   2641  OW  HOH X 857      21.670   1.235  16.847  0.00  0.00            
ATOM   2642  HW1 HOH X 857      22.152   0.408  16.834  0.00  0.00            
ATOM   2643  HW2 HOH X 857      21.154   1.200  17.653  0.00  0.00            
ATOM   2644  OW  HOH X 858      31.009   3.562  38.413  0.00  0.00            
ATOM   2645  HW1 HOH X 858      31.857   3.291  38.059  0.00  0.00            
ATOM   2646  HW2 HOH X 858      30.751   4.309  37.873  0.00  0.00            
ATOM   2647  OW  HOH X 859      40.686   2.212  23.695  0.00  0.00            
ATOM   2648  HW1 HOH X 859      40.981   2.523  22.839  0.00  0.00            
ATOM   2649  HW2 HOH X 859      41.361   2.512  24.304  0.00  0.00            
ATOM   2650  OW  HOH X 860      22.812   6.394  19.049  0.00  0.00            
ATOM   2651  HW1 HOH X 860      23.487   6.312  18.376  0.00  0.00            
ATOM   2652  HW2 HOH X 860      23.297   6.557  19.858  0.00  0.00            
ATOM   2653  OW  HOH X 861      32.002   8.891  33.593  0.00  0.00            
ATOM   2654  HW1 HOH X 861      32.063   8.234  32.899  0.00  0.00            
ATOM   2655  HW2 HOH X 861      31.128   8.770  33.963  0.00  0.00            
ATOM   2656  OW  HOH X 862      14.035   5.684  20.215  0.00  0.00            
ATOM   2657  HW1 HOH X 862      14.405   5.758  21.095  0.00  0.00            
ATOM   2658  HW2 HOH X 862      14.014   6.583  19.888  0.00  0.00            
ATOM   2659  OW  HOH X 863      24.286   4.454   5.430  0.00  0.00            
ATOM   2660  HW1 HOH X 863      24.509   3.523   5.463  0.00  0.00            
ATOM   2661  HW2 HOH X 863      25.075   4.900   5.737  0.00  0.00            
ATOM   2662  OW  HOH X 864       9.509   4.229  19.833  0.00  0.00            
ATOM   2663  HW1 HOH X 864      10.077   4.967  20.055  0.00  0.00            
ATOM   2664  HW2 HOH X 864      10.086   3.609  19.387  0.00  0.00            
ATOM   2665  OW  HOH X 865      10.015   6.429  29.976  0.00  0.00            
ATOM   2666  HW1 HOH X 865       9.873   5.545  30.315  0.00  0.00            
ATOM   2667  HW2 HOH X 865       9.302   6.564  29.352  0.00  0.00            
ATOM   2668  OW  HOH X 866      23.618   4.208   1.521  0.00  0.00            
ATOM   2669  HW1 HOH X 866      22.985   3.572   1.853  0.00  0.00            
ATOM   2670  HW2 HOH X 866      24.372   3.680   1.256  0.00  0.00            
ATOM   2671  OW  HOH X 867      22.320  18.603   7.986  0.00  0.00            
ATOM   2672  HW1 HOH X 867      22.588  18.306   7.116  0.00  0.00            
ATOM   2673  HW2 HOH X 867      22.088  17.800   8.453  0.00  0.00            
ATOM   2674  OW  HOH X 868      41.366   5.123  30.680  0.00  0.00            
ATOM   2675  HW1 HOH X 868      40.494   5.506  30.587  0.00  0.00            
ATOM   2676  HW2 HOH X 868      41.931   5.863  30.902  0.00  0.00            
ATOM   2677  OW  HOH X 869      29.590   0.352   9.633  0.00  0.00            
ATOM   2678  HW1 HOH X 869      30.491   0.668   9.696  0.00  0.00            
ATOM   2679  HW2 HOH X 869      29.330   0.188  10.539  0.00  0.00            
ATOM   2680  OW  HOH X 870      33.232  17.136  23.196  0.00  0.00            
ATOM   2681  HW1 HOH X 870      33.184  16.352  23.743  0.00  0.00            
ATOM   2682  HW2 HOH X 870      32.416  17.129  22.695  0.00  0.00            
ATOM   2683  OW  HOH X 871      20.952   7.784  24.248  0.00  0.00            
ATOM   2684  HW1 HOH X 871      21.276   8.292  23.504  0.00  0.00            
ATOM   2685  HW2 HOH X 871      21.735   7.587  24.763  0.00  0.00            
ATOM   2686  OW  HOH X 872      25.848   4.746  27.384  0.00  0.00            
ATOM   2687  HW1 HOH X 872      25.403   3.930  27.615  0.00  0.00            
ATOM   2688  HW2 HOH X 872      26.777   4.516  27.367  0.00  0.00            
ATOM   2689  OW  HOH X 873      43.730   3.631  31.879  0.00  0.00            
ATOM   2690  HW1 HOH X 873      44.509   4.171  32.011  0.00  0.00            
ATOM   2691  HW2 HOH X 873      43.117   4.202  31.416  0.00  0.00            
ATOM   2692  OW  HOH X 874      42.853  20.568  32.849  0.00  0.00            
ATOM   2693  HW1 HOH X 874      42.828  21.005  31.997  0.00  0.00            
ATOM   2694  HW2 HOH X 874      42.209  21.038  33.378  0.00  0.00            
ATOM   2695  OW  HOH X 875      34.875   3.226  12.533  0.00  0.00            
ATOM   2696  HW1 HOH X 875      34.101   3.086  13.078  0.00  0.00            
ATOM   2697  HW2 HOH X 875      35.610   2.960  13.086  0.00  0.00            
ATOM   2698  OW  HOH X 876      35.798   7.284  37.927  0.00  0.00            
ATOM   2699  HW1 HOH X 876      35.248   6.503  37.874  0.00  0.00            
ATOM   2700  HW2 HOH X 876      36.582   6.995  38.395  0.00  0.00            
ATOM   2701  OW  HOH X 877      15.078  15.293  15.424  0.00  0.00            
ATOM   2702  HW1 HOH X 877      14.349  15.672  14.933  0.00  0.00            
ATOM   2703  HW2 HOH X 877      15.572  14.795  14.772  0.00  0.00            
ATOM   2704  OW  HOH X 878      33.751   5.507  37.547  0.00  0.00            
ATOM   2705  HW1 HOH X 878      33.080   6.025  37.103  0.00  0.00            
ATOM   2706  HW2 HOH X 878      33.726   4.655  37.111  0.00  0.00            
ATOM   2707  OW  HOH X 879      12.901   2.275  11.857  0.00  0.00            
ATOM   2708  HW1 HOH X 879      13.065   1.754  12.643  0.00  0.00            
ATOM   2709  HW2 HOH X 879      12.746   1.629  11.168  0.00  0.00            
ATOM   2710  OW  HOH X 880      22.042  15.001   2.990  0.00  0.00            
ATOM   2711  HW1 HOH X 880      21.510  14.802   3.760  0.00  0.00            
ATOM   2712  HW2 HOH X 880      22.816  15.442   3.341  0.00  0.00            
ATOM   2713  OW  HOH X 881      33.382  14.437  10.280  0.00  0.00            
ATOM   2714  HW1 HOH X 881      33.319  14.110   9.383  0.00  0.00            
ATOM   2715  HW2 HOH X 881      34.321  14.548  10.429  0.00  0.00            
ATOM   2716  OW  HOH X 882      39.086   5.259  27.794  0.00  0.00            
ATOM   2717  HW1 HOH X 882      39.554   4.425  27.813  0.00  0.00            
ATOM   2718  HW2 HOH X 882      38.957   5.482  28.716  0.00  0.00            
ATOM   2719  OW  HOH X 883       7.683  -0.582  19.803  0.00  0.00            
ATOM   2720  HW1 HOH X 883       7.227  -0.011  20.421  0.00  0.00            
ATOM   2721  HW2 HOH X 883       8.596  -0.300  19.845  0.00  0.00            
ATOM   2722  OW  HOH X 884      35.000  -1.733  16.339  0.00  0.00            
ATOM   2723  HW1 HOH X 884      35.538  -1.185  16.910  0.00  0.00            
ATOM   2724  HW2 HOH X 884      35.084  -1.332  15.473  0.00  0.00            
ATOM   2725  OW  HOH X 885      18.888   2.476  26.763  0.00  0.00            
ATOM   2726  HW1 HOH X 885      19.423   1.730  27.033  0.00  0.00            
ATOM   2727  HW2 HOH X 885      17.992   2.224  26.987  0.00  0.00            
ATOM   2728  OW  HOH X 886      46.119  14.609  15.969  0.00  0.00            
ATOM   2729  HW1 HOH X 886      46.091  15.501  16.316  0.00  0.00            
ATOM   2730  HW2 HOH X 886      45.296  14.213  16.258  0.00  0.00            
ATOM   2731  OW  HOH X 887      39.071   9.295  30.585  0.00  0.00            
ATOM   2732  HW1 HOH X 887      38.932   9.648  31.464  0.00  0.00            
ATOM   2733  HW2 HOH X 887      38.613   9.906  30.006  0.00  0.00            
ATOM   2734  OW  HOH X 888      33.913  17.751  15.317  0.00  0.00            
ATOM   2735  HW1 HOH X 888      33.557  16.933  14.969  0.00  0.00            
ATOM   2736  HW2 HOH X 888      34.184  17.535  16.209  0.00  0.00            
ATOM   2737  OW  HOH X 889      26.448   2.183  18.465  0.00  0.00            
ATOM   2738  HW1 HOH X 889      25.993   2.342  17.638  0.00  0.00            
ATOM   2739  HW2 HOH X 889      27.206   1.651  18.223  0.00  0.00            
ATOM   2740  OW  HOH X 890      35.569  18.304  12.242  0.00  0.00            
ATOM   2741  HW1 HOH X 890      36.379  18.417  12.739  0.00  0.00            
ATOM   2742  HW2 HOH X 890      35.808  18.521  11.341  0.00  0.00            
ATOM   2743  OW  HOH X 891      49.178   7.854  20.123  0.00  0.00            
ATOM   2744  HW1 HOH X 891      50.035   7.665  19.740  0.00  0.00            
ATOM   2745  HW2 HOH X 891      49.123   8.810  20.126  0.00  0.00            
ATOM   2746  OW  HOH X 892      20.416  15.184  19.688  0.00  0.00            
ATOM   2747  HW1 HOH X 892      20.136  14.481  20.274  0.00  0.00            
ATOM   2748  HW2 HOH X 892      19.879  15.935  19.939  0.00  0.00            
ATOM   2749  OW  HOH X 893      31.682  17.907  11.252  0.00  0.00            
ATOM   2750  HW1 HOH X 893      31.191  18.607  10.822  0.00  0.00            
ATOM   2751  HW2 HOH X 893      32.198  17.509  10.551  0.00  0.00            
ATOM   2752  OW  HOH X 894      12.873  -2.138  16.583  0.00  0.00            
ATOM   2753  HW1 HOH X 894      13.586  -2.604  16.146  0.00  0.00            
ATOM   2754  HW2 HOH X 894      12.320  -1.821  15.869  0.00  0.00            
ATOM   2755  OW  HOH X 895      21.871   9.125  36.674  0.00  0.00            
ATOM   2756  HW1 HOH X 895      21.163   9.727  36.902  0.00  0.00            
ATOM   2757  HW2 HOH X 895      21.850   8.459  37.362  0.00  0.00            
ATOM   2758  OW  HOH X 896      17.480   3.494  18.904  0.00  0.00            
ATOM   2759  HW1 HOH X 896      17.257   4.384  18.631  0.00  0.00            
ATOM   2760  HW2 HOH X 896      18.073   3.176  18.224  0.00  0.00            
ATOM   2761  OW  HOH X 897      34.491   8.237  46.815  0.00  0.00            
ATOM   2762  HW1 HOH X 897      35.030   8.685  46.164  0.00  0.00            
ATOM   2763  HW2 HOH X 897      33.755   7.882  46.315  0.00  0.00            
ATOM   2764  OW  HOH X 898       6.736   3.266  19.481  0.00  0.00            
ATOM   2765  HW1 HOH X 898       6.685   2.652  20.213  0.00  0.00            
ATOM   2766  HW2 HOH X 898       7.644   3.568  19.485  0.00  0.00            
ATOM   2767  OW  HOH X 899      18.579  19.258  25.047  0.00  0.00            
ATOM   2768  HW1 HOH X 899      18.638  20.170  24.760  0.00  0.00            
ATOM   2769  HW2 HOH X 899      18.880  19.272  25.955  0.00  0.00            
ATOM   2770  OW  HOH X 900      17.195  15.125  21.464  0.00  0.00            
ATOM   2771  HW1 HOH X 900      17.563  15.936  21.813  0.00  0.00            
ATOM   2772  HW2 HOH X 900      17.275  14.496  22.182  0.00  0.00            
ATOM   2773  OW  HOH X 901      21.955   8.443   6.173  0.00  0.00            
ATOM   2774  HW1 HOH X 901      21.797   9.384   6.260  0.00  0.00            
ATOM   2775  HW2 HOH X 901      21.257   8.034   6.684  0.00  0.00            
ATOM   2776  OW  HOH X 902       4.999   8.220  22.652  0.00  0.00            
ATOM   2777  HW1 HOH X 902       4.827   9.057  23.082  0.00  0.00            
ATOM   2778  HW2 HOH X 902       5.924   8.046  22.827  0.00  0.00            
ATOM   2779  OW  HOH X 903      26.491  13.723  19.497  0.00  0.00            
ATOM   2780  HW1 HOH X 903      26.215  14.582  19.176  0.00  0.00            
ATOM   2781  HW2 HOH X 903      26.980  13.340  18.768  0.00  0.00            
ATOM   2782  OW  HOH X 904      36.044   7.234  15.589  0.00  0.00            
ATOM   2783  HW1 HOH X 904      36.884   7.693  15.565  0.00  0.00            
ATOM   2784  HW2 HOH X 904      35.439   7.817  15.130  0.00  0.00            
ATOM   2785  OW  HOH X 905      45.297  10.863  20.960  0.00  0.00            
ATOM   2786  HW1 HOH X 905      45.286  10.050  20.455  0.00  0.00            
ATOM   2787  HW2 HOH X 905      44.624  10.740  21.629  0.00  0.00            
ATOM   2788  OW  HOH X 906      16.030  16.265  26.830  0.00  0.00            
ATOM   2789  HW1 HOH X 906      15.726  16.929  27.448  0.00  0.00            
ATOM   2790  HW2 HOH X 906      15.508  16.414  26.041  0.00  0.00            
ATOM   2791  OW  HOH X 907      42.801  -1.613  27.525  0.00  0.00            
ATOM   2792  HW1 HOH X 907      43.225  -1.346  28.340  0.00  0.00            
ATOM   2793  HW2 HOH X 907      41.958  -1.159  27.532  0.00  0.00            
ATOM   2794  OW  HOH X 908      31.568   0.830  16.804  0.00  0.00            
ATOM   2795  HW1 HOH X 908      31.397  -0.070  16.527  0.00  0.00            
ATOM   2796  HW2 HOH X 908      31.972   0.743  17.667  0.00  0.00            
ATOM   2797  OW  HOH X 909      11.586   3.933  26.914  0.00  0.00            
ATOM   2798  HW1 HOH X 909      11.877   3.678  26.039  0.00  0.00            
ATOM   2799  HW2 HOH X 909      10.673   4.192  26.798  0.00  0.00            
ATOM   2800  OW  HOH X 910      50.238  10.476  24.311  0.00  0.00            
ATOM   2801  HW1 HOH X 910      51.122  10.114  24.257  0.00  0.00            
ATOM   2802  HW2 HOH X 910      49.747   9.832  24.823  0.00  0.00            
ATOM   2803  OW  HOH X 911      43.566   9.320  10.297  0.00  0.00            
ATOM   2804  HW1 HOH X 911      42.732   9.131  10.726  0.00  0.00            
ATOM   2805  HW2 HOH X 911      43.353   9.977   9.635  0.00  0.00            
ATOM   2806  OW  HOH X 912      29.237   4.473  21.453  0.00  0.00            
ATOM   2807  HW1 HOH X 912      29.918   3.922  21.839  0.00  0.00            
ATOM   2808  HW2 HOH X 912      29.713   5.213  21.075  0.00  0.00            
ATOM   2809  OW  HOH X 913      51.093  13.668  22.507  0.00  0.00            
ATOM   2810  HW1 HOH X 913      50.992  13.033  21.798  0.00  0.00            
ATOM   2811  HW2 HOH X 913      51.174  14.513  22.063  0.00  0.00            
ATOM   2812  OW  HOH X 914      25.108  -0.294  16.925  0.00  0.00            
ATOM   2813  HW1 HOH X 914      24.315  -0.497  16.429  0.00  0.00            
ATOM   2814  HW2 HOH X 914      25.539   0.394  16.418  0.00  0.00            
ATOM   2815  OW  HOH X 915      29.879   6.211   2.804  0.00  0.00            
ATOM   2816  HW1 HOH X 915      30.526   5.807   3.381  0.00  0.00            
ATOM   2817  HW2 HOH X 915      29.886   5.668   2.016  0.00  0.00            
ATOM   2818  OW  HOH X 916      18.138  19.735   4.425  0.00  0.00            
ATOM   2819  HW1 HOH X 916      17.936  20.660   4.283  0.00  0.00            
ATOM   2820  HW2 HOH X 916      17.536  19.267   3.847  0.00  0.00            
ATOM   2821  OW  HOH X 917      22.954  -5.069  20.901  0.00  0.00            
ATOM   2822  HW1 HOH X 917      23.213  -4.372  20.299  0.00  0.00            
ATOM   2823  HW2 HOH X 917      22.468  -4.620  21.593  0.00  0.00            
ATOM   2824  OW  HOH X 918      45.296   9.283  16.138  0.00  0.00            
ATOM   2825  HW1 HOH X 918      44.704   9.156  16.879  0.00  0.00            
ATOM   2826  HW2 HOH X 918      45.241  10.218  15.943  0.00  0.00            
ATOM   2827  OW  HOH X 919      32.233   8.963   1.074  0.00  0.00            
ATOM   2828  HW1 HOH X 919      32.460   8.419   1.828  0.00  0.00            
ATOM   2829  HW2 HOH X 919      32.797   9.732   1.156  0.00  0.00            
ATOM   2830  OW  HOH X 920       8.793  16.726  17.207  0.00  0.00            
ATOM   2831  HW1 HOH X 920       8.527  17.437  16.624  0.00  0.00            
ATOM   2832  HW2 HOH X 920       9.673  16.491  16.913  0.00  0.00            
ATOM   2833  OW  HOH X 921      33.787  27.743  24.376  0.00  0.00            
ATOM   2834  HW1 HOH X 921      34.606  27.270  24.525  0.00  0.00            
ATOM   2835  HW2 HOH X 921      33.702  28.320  25.135  0.00  0.00            
ATOM   2836  OW  HOH X 922      35.578  -3.952  25.359  0.00  0.00            
ATOM   2837  HW1 HOH X 922      34.817  -4.293  25.829  0.00  0.00            
ATOM   2838  HW2 HOH X 922      35.984  -3.340  25.972  0.00  0.00            
ATOM   2839  OW  HOH X 923      13.227  14.977  12.047  0.00  0.00            
ATOM   2840  HW1 HOH X 923      13.021  14.782  11.133  0.00  0.00            
ATOM   2841  HW2 HOH X 923      14.093  15.384  12.016  0.00  0.00            
ATOM   2842  OW  HOH X 924      17.114  18.233  19.335  0.00  0.00            
ATOM   2843  HW1 HOH X 924      17.807  17.936  19.925  0.00  0.00            
ATOM   2844  HW2 HOH X 924      16.576  17.456  19.186  0.00  0.00            
ATOM   2845  OW  HOH X 925      29.892  28.026  25.788  0.00  0.00            
ATOM   2846  HW1 HOH X 925      30.133  27.836  24.881  0.00  0.00            
ATOM   2847  HW2 HOH X 925      29.729  27.167  26.178  0.00  0.00            
ATOM   2848  OW  HOH X 926      28.863  10.562  -4.027  0.00  0.00            
ATOM   2849  HW1 HOH X 926      28.814  11.061  -4.843  0.00  0.00            
ATOM   2850  HW2 HOH X 926      28.434   9.731  -4.228  0.00  0.00            
ATOM   2851  OW  HOH X 927      43.781   1.000  31.342  0.00  0.00            
ATOM   2852  HW1 HOH X 927      43.774   1.924  31.593  0.00  0.00            
ATOM   2853  HW2 HOH X 927      43.846   0.527  32.172  0.00  0.00            
ATOM   2854  OW  HOH X 928      39.264  18.765  30.982  0.00  0.00            
ATOM   2855  HW1 HOH X 928      39.528  17.957  31.423  0.00  0.00            
ATOM   2856  HW2 HOH X 928      39.085  18.498  30.080  0.00  0.00            
ATOM   2857  OW  HOH X 929      41.348  -1.441  17.823  0.00  0.00            
ATOM   2858  HW1 HOH X 929      41.452  -0.525  18.081  0.00  0.00            
ATOM   2859  HW2 HOH X 929      41.058  -1.402  16.911  0.00  0.00            
ATOM   2860  OW  HOH X 930      26.374  17.616  33.884  0.00  0.00            
ATOM   2861  HW1 HOH X 930      25.865  18.410  34.050  0.00  0.00            
ATOM   2862  HW2 HOH X 930      25.719  16.951  33.671  0.00  0.00            
ATOM   2863  OW  HOH X 931      12.410  11.383  19.353  0.00  0.00            
ATOM   2864  HW1 HOH X 931      11.559  11.575  18.961  0.00  0.00            
ATOM   2865  HW2 HOH X 931      12.438  11.924  20.142  0.00  0.00            
ATOM   2866  OW  HOH X 932      32.555  10.451  10.519  0.00  0.00            
ATOM   2867  HW1 HOH X 932      31.826  11.009  10.246  0.00  0.00            
ATOM   2868  HW2 HOH X 932      33.324  10.840  10.104  0.00  0.00            
ATOM   2869  OW  HOH X 933      34.050  19.725  23.181  0.00  0.00            
ATOM   2870  HW1 HOH X 933      33.852  18.797  23.307  0.00  0.00            
ATOM   2871  HW2 HOH X 933      33.930  19.870  22.242  0.00  0.00            
ATOM   2872  OW  HOH X 934      12.767  16.818  13.831  0.00  0.00            
ATOM   2873  HW1 HOH X 934      12.940  17.484  13.166  0.00  0.00            
ATOM   2874  HW2 HOH X 934      12.726  15.996  13.343  0.00  0.00            
ATOM   2875  OW  HOH X 935      35.801  24.663  31.879  0.00  0.00            
ATOM   2876  HW1 HOH X 935      35.485  25.555  32.025  0.00  0.00            
ATOM   2877  HW2 HOH X 935      35.693  24.521  30.938  0.00  0.00            
ATOM   2878  OW  HOH X 936      42.820  17.823  32.955  0.00  0.00            
ATOM   2879  HW1 HOH X 936      42.587  18.745  32.849  0.00  0.00            
ATOM   2880  HW2 HOH X 936      42.309  17.531  33.710  0.00  0.00            
ATOM   2881  OW  HOH X 937      17.263  -8.713   8.554  0.00  0.00            
ATOM   2882  HW1 HOH X 937      17.656  -8.280   9.312  0.00  0.00            
ATOM   2883  HW2 HOH X 937      16.566  -8.120   8.274  0.00  0.00            
ATOM   2884  OW  HOH X 938      20.041  27.165  15.108  0.00  0.00            
ATOM   2885  HW1 HOH X 938      20.336  27.203  16.018  0.00  0.00            
ATOM   2886  HW2 HOH X 938      19.093  27.288  15.158  0.00  0.00            
ATOM   2887  OW  HOH X 939      24.567  -7.356  11.520  0.00  0.00            
ATOM   2888  HW1 HOH X 939      24.407  -6.465  11.210  0.00  0.00            
ATOM   2889  HW2 HOH X 939      24.429  -7.308  12.466  0.00  0.00            
ATOM   2890  OW  HOH X 940      38.639  11.473   3.126  0.00  0.00            
ATOM   2891  HW1 HOH X 940      39.328  10.832   2.953  0.00  0.00            
ATOM   2892  HW2 HOH X 940      38.773  12.153   2.466  0.00  0.00            
ATOM   2893  OW  HOH X 941      11.323   6.382  11.400  0.00  0.00            
ATOM   2894  HW1 HOH X 941      11.895   6.453  10.636  0.00  0.00            
ATOM   2895  HW2 HOH X 941      10.968   5.494  11.353  0.00  0.00            
ATOM   2896  OW  HOH X 942      14.321  16.137  21.035  0.00  0.00            
ATOM   2897  HW1 HOH X 942      15.253  15.983  21.194  0.00  0.00            
ATOM   2898  HW2 HOH X 942      14.059  16.748  21.723  0.00  0.00            
ATOM   2899  OW  HOH X 943      19.239  24.441  20.718  0.00  0.00            
ATOM   2900  HW1 HOH X 943      19.200  23.948  19.898  0.00  0.00            
ATOM   2901  HW2 HOH X 943      18.711  23.930  21.331  0.00  0.00            
ATOM   2902  OW  HOH X 944      22.892  21.401   8.112  0.00  0.00            
ATOM   2903  HW1 HOH X 944      23.517  21.563   7.405  0.00  0.00            
ATOM   2904  HW2 HOH X 944      22.844  20.448   8.177  0.00  0.00            
ATOM   2905  OW  HOH X 945      30.661  10.504   6.422  0.00  0.00            
ATOM   2906  HW1 HOH X 945      30.135   9.705   6.396  0.00  0.00            
ATOM   2907  HW2 HOH X 945      31.104  10.528   5.574  0.00  0.00            
ATOM   2908  OW  HOH X 946      33.119  -1.327  34.566  0.00  0.00            
ATOM   2909  HW1 HOH X 946      32.691  -1.677  35.347  0.00  0.00            
ATOM   2910  HW2 HOH X 946      32.707  -0.474  34.428  0.00  0.00            
ATOM   2911  OW  HOH X 947      36.435   8.064  20.117  0.00  0.00            
ATOM   2912  HW1 HOH X 947      35.896   7.353  19.771  0.00  0.00            
ATOM   2913  HW2 HOH X 947      36.066   8.246  20.981  0.00  0.00            
ATOM   2914  OW  HOH X 948      11.641  16.279  23.966  0.00  0.00            
ATOM   2915  HW1 HOH X 948      10.736  16.400  24.252  0.00  0.00            
ATOM   2916  HW2 HOH X 948      11.971  15.563  24.509  0.00  0.00            
ATOM   2917  OW  HOH X 949       4.587   6.264  25.344  0.00  0.00            
ATOM   2918  HW1 HOH X 949       5.045   6.716  24.636  0.00  0.00            
ATOM   2919  HW2 HOH X 949       3.686   6.581  25.288  0.00  0.00            
ATOM   2920  OW  HOH X 950      46.542  22.481  24.018  0.00  0.00            
ATOM   2921  HW1 HOH X 950      45.973  22.640  24.771  0.00  0.00            
ATOM   2922  HW2 HOH X 950      46.583  21.527  23.946  0.00  0.00            
ATOM   2923  OW  HOH X 951      30.672  -0.714  25.546  0.00  0.00            
ATOM   2924  HW1 HOH X 951      31.201  -1.423  25.181  0.00  0.00            
ATOM   2925  HW2 HOH X 951      30.699  -0.027  24.879  0.00  0.00            
ATOM   2926  OW  HOH X 952      25.841  12.465  15.918  0.00  0.00            
ATOM   2927  HW1 HOH X 952      26.635  12.644  16.420  0.00  0.00            
ATOM   2928  HW2 HOH X 952      25.276  13.220  16.085  0.00  0.00            
ATOM   2929  OW  HOH X 953      25.469   2.554  15.838  0.00  0.00            
ATOM   2930  HW1 HOH X 953      24.878   2.364  15.109  0.00  0.00            
ATOM   2931  HW2 HOH X 953      25.829   3.417  15.636  0.00  0.00            
ATOM   2932  OW  HOH X 954      14.704  11.413  12.569  0.00  0.00            
ATOM   2933  HW1 HOH X 954      14.720  11.175  11.641  0.00  0.00            
ATOM   2934  HW2 HOH X 954      15.459  10.961  12.945  0.00  0.00            
ATOM   2935  OW  HOH X 955      37.945  -5.113  26.244  0.00  0.00            
ATOM   2936  HW1 HOH X 955      37.192  -5.039  25.657  0.00  0.00            
ATOM   2937  HW2 HOH X 955      38.377  -4.261  26.189  0.00  0.00            
ATOM   2938  OW  HOH X 956      35.567  18.168  27.603  0.00  0.00            
ATOM   2939  HW1 HOH X 956      35.098  18.911  27.222  0.00  0.00            
ATOM   2940  HW2 HOH X 956      35.525  17.488  26.930  0.00  0.00            
ATOM   2941  OW  HOH X 957      17.546  21.664   7.320  0.00  0.00            
ATOM   2942  HW1 HOH X 957      18.246  22.252   7.036  0.00  0.00            
ATOM   2943  HW2 HOH X 957      17.958  20.801   7.355  0.00  0.00            
ATOM   2944  OW  HOH X 958      32.874   9.649   4.869  0.00  0.00            
ATOM   2945  HW1 HOH X 958      33.774   9.974   4.837  0.00  0.00            
ATOM   2946  HW2 HOH X 958      32.917   8.785   4.458  0.00  0.00            
ATOM   2947  OW  HOH X 959      28.687  18.880  14.445  0.00  0.00            
ATOM   2948  HW1 HOH X 959      29.491  18.449  14.734  0.00  0.00            
ATOM   2949  HW2 HOH X 959      27.992  18.451  14.944  0.00  0.00            
ATOM   2950  OW  HOH X 960      39.129  22.150  36.783  0.00  0.00            
ATOM   2951  HW1 HOH X 960      40.062  22.275  36.956  0.00  0.00            
ATOM   2952  HW2 HOH X 960      38.689  22.605  37.501  0.00  0.00            
ATOM   2953  OW  HOH X 961      30.559  14.355  35.095  0.00  0.00            
ATOM   2954  HW1 HOH X 961      29.667  14.691  35.014  0.00  0.00            
ATOM   2955  HW2 HOH X 961      30.895  14.347  34.199  0.00  0.00            
ATOM   2956  OW  HOH X 962      43.152  -2.464  32.804  0.00  0.00            
ATOM   2957  HW1 HOH X 962      42.305  -2.429  33.249  0.00  0.00            
ATOM   2958  HW2 HOH X 962      43.097  -3.238  32.244  0.00  0.00            
ATOM   2959  OW  HOH X 963      30.969  15.364  37.515  0.00  0.00            
ATOM   2960  HW1 HOH X 963      30.710  14.910  36.713  0.00  0.00            
ATOM   2961  HW2 HOH X 963      31.560  14.753  37.955  0.00  0.00            
ATOM   2962  OW  HOH X 964      41.366  22.089  30.557  0.00  0.00            
ATOM   2963  HW1 HOH X 964      41.137  21.557  29.794  0.00  0.00            
ATOM   2964  HW2 HOH X 964      40.833  21.732  31.267  0.00  0.00            
ATOM   2965  OW  HOH X 965      45.568   7.608  21.620  0.00  0.00            
ATOM   2966  HW1 HOH X 965      46.440   7.814  21.955  0.00  0.00            
ATOM   2967  HW2 HOH X 965      45.109   7.220  22.365  0.00  0.00            
ATOM   2968  OW  HOH X 966      19.029   9.259  13.008  0.00  0.00            
ATOM   2969  HW1 HOH X 966      19.369  10.078  12.648  0.00  0.00            
ATOM   2970  HW2 HOH X 966      19.797   8.694  13.088  0.00  0.00            
ATOM   2971  OW  HOH X 967      41.517   9.803  15.905  0.00  0.00            
ATOM   2972  HW1 HOH X 967      40.764  10.374  16.057  0.00  0.00            
ATOM   2973  HW2 HOH X 967      42.248  10.404  15.758  0.00  0.00            
ATOM   2974  OW  HOH X 968       7.049  15.809  21.261  0.00  0.00            
ATOM   2975  HW1 HOH X 968       6.812  15.190  21.952  0.00  0.00            
ATOM   2976  HW2 HOH X 968       6.251  15.905  20.741  0.00  0.00            
ATOM   2977  OW  HOH X 969      46.611  18.256  27.332  0.00  0.00            
ATOM   2978  HW1 HOH X 969      47.489  18.348  27.703  0.00  0.00            
ATOM   2979  HW2 HOH X 969      46.454  19.084  26.878  0.00  0.00            
ATOM   2980  OW  HOH X 970      14.025  15.917   7.272  0.00  0.00            
ATOM   2981  HW1 HOH X 970      14.708  16.300   6.722  0.00  0.00            
ATOM   2982  HW2 HOH X 970      13.364  15.606   6.652  0.00  0.00            
ATOM   2983  OW  HOH X 971      15.431  -5.177  12.381  0.00  0.00            
ATOM   2984  HW1 HOH X 971      14.648  -5.025  11.852  0.00  0.00            
ATOM   2985  HW2 HOH X 971      16.159  -4.942  11.806  0.00  0.00            
ATOM   2986  OW  HOH X 972      15.078  20.928  18.980  0.00  0.00            
ATOM   2987  HW1 HOH X 972      14.231  20.644  19.324  0.00  0.00            
ATOM   2988  HW2 HOH X 972      15.359  20.211  18.411  0.00  0.00            
ATOM   2989  OW  HOH X 973      41.401   9.139  12.502  0.00  0.00            
ATOM   2990  HW1 HOH X 973      41.802   8.849  13.322  0.00  0.00            
ATOM   2991  HW2 HOH X 973      40.557   8.689  12.476  0.00  0.00            
ATOM   2992  OW  HOH X 974      27.750  -3.918  19.010  0.00  0.00            
ATOM   2993  HW1 HOH X 974      27.230  -3.156  19.267  0.00  0.00            
ATOM   2994  HW2 HOH X 974      28.055  -4.291  19.837  0.00  0.00            
ATOM   2995  OW  HOH X 975      22.562  12.785  16.582  0.00  0.00            
ATOM   2996  HW1 HOH X 975      21.619  12.925  16.503  0.00  0.00            
ATOM   2997  HW2 HOH X 975      22.918  13.652  16.779  0.00  0.00            
ATOM   2998  OW  HOH X 976      42.050   1.766  34.772  0.00  0.00            
ATOM   2999  HW1 HOH X 976      41.328   1.940  34.167  0.00  0.00            
ATOM   3000  HW2 HOH X 976      42.582   2.561  34.745  0.00  0.00            
ATOM   3001  OW  HOH X 977      20.274   0.579  22.696  0.00  0.00            
ATOM   3002  HW1 HOH X 977      19.426   0.864  23.036  0.00  0.00            
ATOM   3003  HW2 HOH X 977      20.294   0.908  21.797  0.00  0.00            
ATOM   3004  OW  HOH X 978      41.604  16.164  15.066  0.00  0.00            
ATOM   3005  HW1 HOH X 978      41.779  16.222  14.127  0.00  0.00            
ATOM   3006  HW2 HOH X 978      41.488  17.072  15.346  0.00  0.00            
ATOM   3007  OW  HOH X 979      42.450  11.357  21.893  0.00  0.00            
ATOM   3008  HW1 HOH X 979      42.201  10.656  21.290  0.00  0.00            
ATOM   3009  HW2 HOH X 979      42.457  10.941  22.755  0.00  0.00            
ATOM   3010  OW  HOH X 980      36.514  10.516   1.637  0.00  0.00            
ATOM   3011  HW1 HOH X 980      37.286  10.744   2.155  0.00  0.00            
ATOM   3012  HW2 HOH X 980      35.827  10.359   2.286  0.00  0.00            
ATOM   3013  OW  HOH X 981      21.938   8.854  22.010  0.00  0.00            
ATOM   3014  HW1 HOH X 981      22.206   9.772  22.046  0.00  0.00            
ATOM   3015  HW2 HOH X 981      21.257   8.829  21.338  0.00  0.00            
ATOM   3016  OW  HOH X 982      29.722  15.319  21.933  0.00  0.00            
ATOM   3017  HW1 HOH X 982      30.450  14.848  21.527  0.00  0.00            
ATOM   3018  HW2 HOH X 982      29.324  14.680  22.525  0.00  0.00            
ATOM   3019  OW  HOH X 983      29.818  17.442  24.486  0.00  0.00            
ATOM   3020  HW1 HOH X 983      29.760  16.789  23.788  0.00  0.00            
ATOM   3021  HW2 HOH X 983      29.606  16.958  25.284  0.00  0.00            
ATOM   3022  OW  HOH X 984      21.018  18.636  23.684  0.00  0.00            
ATOM   3023  HW1 HOH X 984      21.662  19.270  23.368  0.00  0.00            
ATOM   3024  HW2 HOH X 984      20.371  19.164  24.152  0.00  0.00            
ATOM   3025  OW  HOH X 985      37.025  -0.595  20.982  0.00  0.00            
ATOM   3026  HW1 HOH X 985      37.852  -0.346  21.395  0.00  0.00            
ATOM   3027  HW2 HOH X 985      36.485  -0.918  21.702  0.00  0.00            
ATOM   3028  OW  HOH X 986      25.962  17.385  12.762  0.00  0.00            
ATOM   3029  HW1 HOH X 986      26.758  17.786  12.413  0.00  0.00            
ATOM   3030  HW2 HOH X 986      26.268  16.824  13.474  0.00  0.00            
ATOM   3031  OW  HOH X 987      36.570   5.043  22.309  0.00  0.00            
ATOM   3032  HW1 HOH X 987      36.691   5.838  21.790  0.00  0.00            
ATOM   3033  HW2 HOH X 987      37.314   5.033  22.910  0.00  0.00            
ATOM   3034  OW  HOH X 988       5.785  10.080  19.457  0.00  0.00            
ATOM   3035  HW1 HOH X 988       4.927   9.689  19.617  0.00  0.00            
ATOM   3036  HW2 HOH X 988       5.593  10.981  19.196  0.00  0.00            
ATOM   3037  OW  HOH X 989      40.506   8.073  23.365  0.00  0.00            
ATOM   3038  HW1 HOH X 989      40.728   7.212  23.721  0.00  0.00            
ATOM   3039  HW2 HOH X 989      41.147   8.217  22.669  0.00  0.00            
ATOM   3040  OW  HOH X 990      21.090  -1.936  14.582  0.00  0.00            
ATOM   3041  HW1 HOH X 990      21.232  -2.868  14.416  0.00  0.00            
ATOM   3042  HW2 HOH X 990      21.026  -1.545  13.710  0.00  0.00            
ATOM   3043  OW  HOH X 991      16.068  23.418  19.390  0.00  0.00            
ATOM   3044  HW1 HOH X 991      15.585  22.592  19.420  0.00  0.00            
ATOM   3045  HW2 HOH X 991      16.989  23.156  19.379  0.00  0.00            
ATOM   3046  OW  HOH X 992      33.510  20.111  33.658  0.00  0.00            
ATOM   3047  HW1 HOH X 992      33.436  19.183  33.434  0.00  0.00            
ATOM   3048  HW2 HOH X 992      34.451  20.288  33.638  0.00  0.00            
ATOM   3049  OW  HOH X 993      39.462  11.009  21.281  0.00  0.00            
ATOM   3050  HW1 HOH X 993      39.127  10.601  20.483  0.00  0.00            
ATOM   3051  HW2 HOH X 993      38.769  11.610  21.553  0.00  0.00            
ATOM   3052  OW  HOH X 994      42.793  19.940  26.930  0.00  0.00            
ATOM   3053  HW1 HOH X 994      43.545  20.300  27.399  0.00  0.00            
ATOM   3054  HW2 HOH X 994      43.174  19.342  26.287  0.00  0.00            
ATOM   3055  OW  HOH X 995      31.403   8.382  15.287  0.00  0.00            
ATOM   3056  HW1 HOH X 995      31.155   7.531  15.646  0.00  0.00            
ATOM   3057  HW2 HOH X 995      31.413   8.968  16.044  0.00  0.00            
ATOM   3058  OW  HOH X 996      40.179  -2.554  33.832  0.00  0.00            
ATOM   3059  HW1 HOH X 996      40.131  -1.815  34.437  0.00  0.00            
ATOM   3060  HW2 HOH X 996      39.290  -2.640  33.487  0.00  0.00            
ATOM   3061  OW  HOH X 997      19.056  13.927  28.277  0.00  0.00            
ATOM   3062  HW1 HOH X 997      18.440  13.421  27.748  0.00  0.00            
ATOM   3063  HW2 HOH X 997      18.777  13.776  29.180  0.00  0.00            
ATOM   3064  OW  HOH X 998      17.157   9.119  30.047  0.00  0.00            
ATOM   3065  HW1 HOH X 998      16.608   9.853  29.772  0.00  0.00            
ATOM   3066  HW2 HOH X 998      17.589   9.428  30.844  0.00  0.00            
ATOM   3067  OW  HOH X 999      20.933  -5.227  16.355  0.00  0.00            
ATOM   3068  HW1 HOH X 999      20.669  -5.957  15.796  0.00  0.00            
ATOM   3069  HW2 HOH X 999      20.279  -5.211  17.054  0.00  0.00            
ATOM   3070  OW  HOH X1000      17.337  26.769  12.158  0.00  0.00            
ATOM   3071  HW1 HOH X1000      16.418  26.943  11.957  0.00  0.00            
ATOM   3072  HW2 HOH X1000      17.533  25.954  11.697  0.00  0.00            
ATOM   3073  OW  HOH X1001      35.934  -0.373  18.508  0.00  0.00            
ATOM   3074  HW1 HOH X1001      36.407   0.408  18.223  0.00  0.00            
ATOM   3075  HW2 HOH X1001      36.120  -0.439  19.445  0.00  0.00            
ATOM   3076  OW  HOH X1002      36.719  15.688  12.951  0.00  0.00            
ATOM   3077  HW1 HOH X1002      36.596  15.216  12.127  0.00  0.00            
ATOM   3078  HW2 HOH X1002      36.803  16.605  12.691  0.00  0.00            
ATOM   3079  OW  HOH X1003      22.439  13.487   0.135  0.00  0.00            
ATOM   3080  HW1 HOH X1003      22.107  14.113  -0.509  0.00  0.00            
ATOM   3081  HW2 HOH X1003      22.332  13.929   0.977  0.00  0.00            
ATOM   3082  OW  HOH X1004      38.091   8.158  24.732  0.00  0.00            
ATOM   3083  HW1 HOH X1004      38.839   7.908  24.190  0.00  0.00            
ATOM   3084  HW2 HOH X1004      38.303   7.825  25.604  0.00  0.00            
ATOM   3085  OW  HOH X1005      28.278  15.895   4.480  0.00  0.00            
ATOM   3086  HW1 HOH X1005      27.666  16.592   4.241  0.00  0.00            
ATOM   3087  HW2 HOH X1005      27.894  15.495   5.260  0.00  0.00            
ATOM   3088  OW  HOH X1006      31.344  17.515  28.033  0.00  0.00            
ATOM   3089  HW1 HOH X1006      32.045  16.882  27.875  0.00  0.00            
ATOM   3090  HW2 HOH X1006      31.521  18.227  27.418  0.00  0.00            
ATOM   3091  OW  HOH X1007      14.184   1.228  24.584  0.00  0.00            
ATOM   3092  HW1 HOH X1007      14.265   0.302  24.812  0.00  0.00            
ATOM   3093  HW2 HOH X1007      14.673   1.317  23.765  0.00  0.00            
ATOM   3094  OW  HOH X1008      19.857   3.759  11.590  0.00  0.00            
ATOM   3095  HW1 HOH X1008      18.974   4.044  11.356  0.00  0.00            
ATOM   3096  HW2 HOH X1008      20.425   4.470  11.293  0.00  0.00            
ATOM   3097  OW  HOH X1009      17.229  -4.076  15.649  0.00  0.00            
ATOM   3098  HW1 HOH X1009      16.427  -3.632  15.375  0.00  0.00            
ATOM   3099  HW2 HOH X1009      17.690  -3.431  16.185  0.00  0.00            
ATOM   3100  OW  HOH X1010      29.074   6.283  14.306  0.00  0.00            
ATOM   3101  HW1 HOH X1010      29.630   6.355  13.530  0.00  0.00            
ATOM   3102  HW2 HOH X1010      29.688   6.175  15.032  0.00  0.00            
ATOM   3103  OW  HOH X1011      39.730   1.459  33.292  0.00  0.00            
ATOM   3104  HW1 HOH X1011      38.842   1.610  32.967  0.00  0.00            
ATOM   3105  HW2 HOH X1011      40.054   0.722  32.773  0.00  0.00            
ATOM   3106  OW  HOH X1012      34.546  13.186   4.292  0.00  0.00            
ATOM   3107  HW1 HOH X1012      34.425  14.109   4.518  0.00  0.00            
ATOM   3108  HW2 HOH X1012      34.767  13.195   3.361  0.00  0.00            
ATOM   3109  OW  HOH X1013      22.274 -10.843  13.598  0.00  0.00            
ATOM   3110  HW1 HOH X1013      22.397 -10.824  12.649  0.00  0.00            
ATOM   3111  HW2 HOH X1013      22.365  -9.930  13.871  0.00  0.00            
ATOM   3112  OW  HOH X1014      33.557  -6.942  28.765  0.00  0.00            
ATOM   3113  HW1 HOH X1014      33.340  -6.151  29.258  0.00  0.00            
ATOM   3114  HW2 HOH X1014      34.362  -6.719  28.297  0.00  0.00            
ATOM   3115  OW  HOH X1015      35.754   6.307  44.785  0.00  0.00            
ATOM   3116  HW1 HOH X1015      35.097   6.217  44.095  0.00  0.00            
ATOM   3117  HW2 HOH X1015      35.283   6.711  45.514  0.00  0.00            
ATOM   3118  OW  HOH X1016      21.011   1.356  19.687  0.00  0.00            
ATOM   3119  HW1 HOH X1016      20.147   0.951  19.765  0.00  0.00            
ATOM   3120  HW2 HOH X1016      20.828   2.281  19.523  0.00  0.00            
ATOM   3121  OW  HOH X1017      44.122  15.880  29.017  0.00  0.00            
ATOM   3122  HW1 HOH X1017      43.191  16.092  29.077  0.00  0.00            
ATOM   3123  HW2 HOH X1017      44.222  15.482  28.151  0.00  0.00            
ATOM   3124  OW  HOH X1018      38.813   7.361  17.659  0.00  0.00            
ATOM   3125  HW1 HOH X1018      39.752   7.308  17.485  0.00  0.00            
ATOM   3126  HW2 HOH X1018      38.744   7.896  18.449  0.00  0.00            
ATOM   3127  OW  HOH X1019      20.646  -8.103  12.036  0.00  0.00            
ATOM   3128  HW1 HOH X1019      19.858  -8.643  12.104  0.00  0.00            
ATOM   3129  HW2 HOH X1019      21.243  -8.618  11.493  0.00  0.00            
ATOM   3130  OW  HOH X1020      12.331  22.995  15.095  0.00  0.00            
ATOM   3131  HW1 HOH X1020      12.175  23.821  15.552  0.00  0.00            
ATOM   3132  HW2 HOH X1020      13.208  22.728  15.374  0.00  0.00            
ATOM   3133  OW  HOH X1021      24.637   8.216  36.032  0.00  0.00            
ATOM   3134  HW1 HOH X1021      25.234   7.788  36.646  0.00  0.00            
ATOM   3135  HW2 HOH X1021      23.844   8.379  36.543  0.00  0.00            
ATOM   3136  OW  HOH X1022      39.191  19.878  35.120  0.00  0.00            
ATOM   3137  HW1 HOH X1022      38.961  19.121  35.659  0.00  0.00            
ATOM   3138  HW2 HOH X1022      39.031  20.633  35.687  0.00  0.00            
ATOM   3139  OW  HOH X1023      19.566   3.302  16.959  0.00  0.00            
ATOM   3140  HW1 HOH X1023      20.072   2.523  16.728  0.00  0.00            
ATOM   3141  HW2 HOH X1023      18.952   3.414  16.233  0.00  0.00            
ATOM   3142  OW  HOH X1024      30.174  21.823  13.620  0.00  0.00            
ATOM   3143  HW1 HOH X1024      30.733  21.254  14.150  0.00  0.00            
ATOM   3144  HW2 HOH X1024      30.060  22.610  14.153  0.00  0.00            
ATOM   3145  OW  HOH X1025      32.478  10.608  20.880  0.00  0.00            
ATOM   3146  HW1 HOH X1025      33.239  10.904  20.380  0.00  0.00            
ATOM   3147  HW2 HOH X1025      31.735  10.752  20.294  0.00  0.00            
ATOM   3148  OW  HOH X1026      42.902  20.872  22.195  0.00  0.00            
ATOM   3149  HW1 HOH X1026      43.350  20.405  21.490  0.00  0.00            
ATOM   3150  HW2 HOH X1026      43.585  21.042  22.843  0.00  0.00            
ATOM   3151  OW  HOH X1027      44.332  -5.487  23.918  0.00  0.00            
ATOM   3152  HW1 HOH X1027      43.579  -6.072  23.999  0.00  0.00            
ATOM   3153  HW2 HOH X1027      44.153  -4.777  24.535  0.00  0.00            
ATOM   3154  OW  HOH X1028      30.663   5.754  43.492  0.00  0.00            
ATOM   3155  HW1 HOH X1028      29.909   5.265  43.821  0.00  0.00            
ATOM   3156  HW2 HOH X1028      30.544   5.770  42.543  0.00  0.00            
ATOM   3157  OW  HOH X1029      33.586  22.456  30.845  0.00  0.00            
ATOM   3158  HW1 HOH X1029      33.712  21.515  30.966  0.00  0.00            
ATOM   3159  HW2 HOH X1029      33.900  22.628  29.957  0.00  0.00            
ATOM   3160  OW  HOH X1030      53.974  13.621  15.716  0.00  0.00            
ATOM   3161  HW1 HOH X1030      53.759  12.712  15.505  0.00  0.00            
ATOM   3162  HW2 HOH X1030      54.377  13.964  14.919  0.00  0.00            
ATOM   3163  OW  HOH X1031      34.066   2.376  16.498  0.00  0.00            
ATOM   3164  HW1 HOH X1031      33.819   1.734  17.164  0.00  0.00            
ATOM   3165  HW2 HOH X1031      33.861   3.223  16.893  0.00  0.00            
ATOM   3166  OW  HOH X1032      14.186  -3.996  15.006  0.00  0.00            
ATOM   3167  HW1 HOH X1032      14.134  -3.964  14.051  0.00  0.00            
ATOM   3168  HW2 HOH X1032      13.966  -4.900  15.229  0.00  0.00            
ATOM   3169  OW  HOH X1033      39.289  10.791  23.937  0.00  0.00            
ATOM   3170  HW1 HOH X1033      39.380   9.841  24.009  0.00  0.00            
ATOM   3171  HW2 HOH X1033      39.733  11.013  23.119  0.00  0.00            
ATOM   3172  OW  HOH X1034      10.498  -4.066  13.958  0.00  0.00            
ATOM   3173  HW1 HOH X1034       9.558  -3.930  14.077  0.00  0.00            
ATOM   3174  HW2 HOH X1034      10.584  -5.001  13.774  0.00  0.00            
ATOM   3175  OW  HOH X1035      37.086  14.646  24.803  0.00  0.00            
ATOM   3176  HW1 HOH X1035      37.431  14.495  25.683  0.00  0.00            
ATOM   3177  HW2 HOH X1035      37.255  15.573  24.635  0.00  0.00            
ATOM   3178  OW  HOH X1036      11.557  13.253  15.801  0.00  0.00            
ATOM   3179  HW1 HOH X1036      11.636  12.978  14.887  0.00  0.00            
ATOM   3180  HW2 HOH X1036      11.585  12.437  16.300  0.00  0.00            
ATOM   3181  OW  HOH X1037      33.923  11.728  40.404  0.00  0.00            
ATOM   3182  HW1 HOH X1037      34.489  11.824  41.169  0.00  0.00            
ATOM   3183  HW2 HOH X1037      34.338  11.040  39.883  0.00  0.00            
ATOM   3184  OW  HOH X1038      24.436   9.400  33.525  0.00  0.00            
ATOM   3185  HW1 HOH X1038      24.094   8.949  34.296  0.00  0.00            
ATOM   3186  HW2 HOH X1038      25.067  10.029  33.876  0.00  0.00            
ATOM   3187  OW  HOH X1039      25.110   0.518  30.414  0.00  0.00            
ATOM   3188  HW1 HOH X1039      24.943   1.284  29.864  0.00  0.00            
ATOM   3189  HW2 HOH X1039      25.961   0.192  30.121  0.00  0.00            
ATOM   3190  OW  HOH X1040      28.772   8.504   6.272  0.00  0.00            
ATOM   3191  HW1 HOH X1040      28.706   8.281   5.344  0.00  0.00            
ATOM   3192  HW2 HOH X1040      28.298   7.805   6.722  0.00  0.00            
ATOM   3193  OW  HOH X1041      19.293   5.158  26.159  0.00  0.00            
ATOM   3194  HW1 HOH X1041      19.185   4.229  25.954  0.00  0.00            
ATOM   3195  HW2 HOH X1041      18.464   5.559  25.898  0.00  0.00            
ATOM   3196  OW  HOH X1042      39.804  12.166  16.264  0.00  0.00            
ATOM   3197  HW1 HOH X1042      40.353  12.918  16.486  0.00  0.00            
ATOM   3198  HW2 HOH X1042      39.326  12.440  15.481  0.00  0.00            
ATOM   3199  OW  HOH X1043      17.583  -2.270  20.382  0.00  0.00            
ATOM   3200  HW1 HOH X1043      16.990  -3.015  20.481  0.00  0.00            
ATOM   3201  HW2 HOH X1043      18.208  -2.363  21.100  0.00  0.00            
ATOM   3202  OW  HOH X1044      29.950   2.318   6.897  0.00  0.00            
ATOM   3203  HW1 HOH X1044      30.021   3.232   6.624  0.00  0.00            
ATOM   3204  HW2 HOH X1044      30.735   2.163   7.422  0.00  0.00            
ATOM   3205  OW  HOH X1045      29.327   9.403   1.464  0.00  0.00            
ATOM   3206  HW1 HOH X1045      29.644  10.305   1.500  0.00  0.00            
ATOM   3207  HW2 HOH X1045      30.085   8.872   1.707  0.00  0.00            
ATOM   3208  OW  HOH X1046      29.041  16.113  10.808  0.00  0.00            
ATOM   3209  HW1 HOH X1046      28.888  17.038  10.998  0.00  0.00            
ATOM   3210  HW2 HOH X1046      28.877  16.030   9.868  0.00  0.00            
ATOM   3211  OW  HOH X1047      13.759   1.178  14.154  0.00  0.00            
ATOM   3212  HW1 HOH X1047      13.874   0.228  14.125  0.00  0.00            
ATOM   3213  HW2 HOH X1047      13.339   1.344  14.997  0.00  0.00            
ATOM   3214  OW  HOH X1048      45.327  12.972  26.913  0.00  0.00            
ATOM   3215  HW1 HOH X1048      44.482  13.419  26.861  0.00  0.00            
ATOM   3216  HW2 HOH X1048      45.191  12.277  27.557  0.00  0.00            
ATOM   3217  OW  HOH X1049      22.521   5.711  -3.711  0.00  0.00            
ATOM   3218  HW1 HOH X1049      23.198   5.821  -4.380  0.00  0.00            
ATOM   3219  HW2 HOH X1049      22.911   6.069  -2.914  0.00  0.00            
ATOM   3220  OW  HOH X1050      29.949  12.542  14.430  0.00  0.00            
ATOM   3221  HW1 HOH X1050      29.237  12.138  13.934  0.00  0.00            
ATOM   3222  HW2 HOH X1050      30.736  12.080  14.140  0.00  0.00            
ATOM   3223  OW  HOH X1051      35.206   7.423   5.171  0.00  0.00            
ATOM   3224  HW1 HOH X1051      35.234   7.394   6.127  0.00  0.00            
ATOM   3225  HW2 HOH X1051      35.590   8.270   4.944  0.00  0.00            
ATOM   3226  OW  HOH X1052      46.382  -9.053  28.964  0.00  0.00            
ATOM   3227  HW1 HOH X1052      46.965  -8.354  28.670  0.00  0.00            
ATOM   3228  HW2 HOH X1052      46.868  -9.859  28.791  0.00  0.00            
ATOM   3229  OW  HOH X1053      37.549   0.996  28.222  0.00  0.00            
ATOM   3230  HW1 HOH X1053      36.632   1.247  28.335  0.00  0.00            
ATOM   3231  HW2 HOH X1053      37.644   0.852  27.280  0.00  0.00            
ATOM   3232  OW  HOH X1054      26.640  16.055  23.461  0.00  0.00            
ATOM   3233  HW1 HOH X1054      26.078  15.657  24.126  0.00  0.00            
ATOM   3234  HW2 HOH X1054      27.287  15.379  23.259  0.00  0.00            
ATOM   3235  OW  HOH X1055      30.814  13.827  17.735  0.00  0.00            
ATOM   3236  HW1 HOH X1055      30.340  14.645  17.581  0.00  0.00            
ATOM   3237  HW2 HOH X1055      31.685  13.982  17.370  0.00  0.00            
ATOM   3238  OW  HOH X1056      27.530  19.160  22.716  0.00  0.00            
ATOM   3239  HW1 HOH X1056      26.825  19.622  23.169  0.00  0.00            
ATOM   3240  HW2 HOH X1056      27.545  18.292  23.119  0.00  0.00            
ATOM   3241  OW  HOH X1057      32.759   6.227  45.822  0.00  0.00            
ATOM   3242  HW1 HOH X1057      33.345   5.470  45.790  0.00  0.00            
ATOM   3243  HW2 HOH X1057      32.150   6.090  45.096  0.00  0.00            
ATOM   3244  OW  HOH X1058      31.692   8.072  29.231  0.00  0.00            
ATOM   3245  HW1 HOH X1058      31.114   7.398  28.874  0.00  0.00            
ATOM   3246  HW2 HOH X1058      32.514   7.613  29.409  0.00  0.00            
ATOM   3247  OW  HOH X1059      19.436  -5.699  18.620  0.00  0.00            
ATOM   3248  HW1 HOH X1059      19.539  -6.499  18.104  0.00  0.00            
ATOM   3249  HW2 HOH X1059      18.701  -5.883  19.205  0.00  0.00            
ATOM   3250  OW  HOH X1060      36.928  23.444  21.381  0.00  0.00            
ATOM   3251  HW1 HOH X1060      37.660  23.123  20.854  0.00  0.00            
ATOM   3252  HW2 HOH X1060      36.714  22.715  21.963  0.00  0.00            
ATOM   3253  OW  HOH X1061      34.637   3.600  24.049  0.00  0.00            
ATOM   3254  HW1 HOH X1061      35.153   3.618  24.855  0.00  0.00            
ATOM   3255  HW2 HOH X1061      34.977   4.330  23.530  0.00  0.00            
ATOM   3256  OW  HOH X1062      18.506   0.533  19.982  0.00  0.00            
ATOM   3257  HW1 HOH X1062      17.710   0.953  19.656  0.00  0.00            
ATOM   3258  HW2 HOH X1062      18.284  -0.396  20.032  0.00  0.00            
ATOM   3259  OW  HOH X1063      29.901   8.539  26.376  0.00  0.00            
ATOM   3260  HW1 HOH X1063      30.542   7.828  26.357  0.00  0.00            
ATOM   3261  HW2 HOH X1063      29.988   8.963  25.522  0.00  0.00            
ATOM   3262  OW  HOH X1064      26.633  15.446  14.375  0.00  0.00            
ATOM   3263  HW1 HOH X1064      27.282  15.033  14.945  0.00  0.00            
ATOM   3264  HW2 HOH X1064      26.099  14.720  14.053  0.00  0.00            
ATOM   3265  OW  HOH X1065      23.866  15.760  32.329  0.00  0.00            
ATOM   3266  HW1 HOH X1065      24.211  16.534  31.885  0.00  0.00            
ATOM   3267  HW2 HOH X1065      23.984  15.049  31.700  0.00  0.00            
ATOM   3268  OW  HOH X1066      35.017  11.850  14.617  0.00  0.00            
ATOM   3269  HW1 HOH X1066      35.570  11.675  13.856  0.00  0.00            
ATOM   3270  HW2 HOH X1066      34.931  12.803  14.637  0.00  0.00            
ATOM   3271  OW  HOH X1067      27.719  21.042  18.551  0.00  0.00            
ATOM   3272  HW1 HOH X1067      28.221  20.947  17.741  0.00  0.00            
ATOM   3273  HW2 HOH X1067      26.821  21.204  18.259  0.00  0.00            
ATOM   3274  OW  HOH X1068      28.353  -1.096  30.083  0.00  0.00            
ATOM   3275  HW1 HOH X1068      28.311  -2.051  30.041  0.00  0.00            
ATOM   3276  HW2 HOH X1068      28.227  -0.890  31.009  0.00  0.00            
ATOM   3277  OW  HOH X1069      15.613  19.382  24.279  0.00  0.00            
ATOM   3278  HW1 HOH X1069      15.593  20.181  24.806  0.00  0.00            
ATOM   3279  HW2 HOH X1069      16.543  19.171  24.199  0.00  0.00            
ATOM   3280  OW  HOH X1070      19.678   1.102   3.467  0.00  0.00            
ATOM   3281  HW1 HOH X1070      20.448   0.578   3.686  0.00  0.00            
ATOM   3282  HW2 HOH X1070      18.988   0.765   4.039  0.00  0.00            
ATOM   3283  OW  HOH X1071      12.219  26.702   9.657  0.00  0.00            
ATOM   3284  HW1 HOH X1071      12.165  26.426   8.742  0.00  0.00            
ATOM   3285  HW2 HOH X1071      12.316  25.886  10.149  0.00  0.00            
ATOM   3286  OW  HOH X1072      27.070   5.610   4.842  0.00  0.00            
ATOM   3287  HW1 HOH X1072      26.526   6.028   4.174  0.00  0.00            
ATOM   3288  HW2 HOH X1072      26.961   6.159   5.618  0.00  0.00            
ATOM   3289  OW  HOH X1073      44.479  13.470  21.885  0.00  0.00            
ATOM   3290  HW1 HOH X1073      43.969  12.661  21.834  0.00  0.00            
ATOM   3291  HW2 HOH X1073      45.028  13.359  22.661  0.00  0.00            
ATOM   3292  OW  HOH X1074      37.244  18.426  36.519  0.00  0.00            
ATOM   3293  HW1 HOH X1074      36.334  18.139  36.440  0.00  0.00            
ATOM   3294  HW2 HOH X1074      37.374  18.559  37.458  0.00  0.00            
ATOM   3295  OW  HOH X1075      26.965   7.254  25.617  0.00  0.00            
ATOM   3296  HW1 HOH X1075      26.766   7.563  24.733  0.00  0.00            
ATOM   3297  HW2 HOH X1075      27.660   7.836  25.925  0.00  0.00            
ATOM   3298  OW  HOH X1076      18.373  14.950  25.813  0.00  0.00            
ATOM   3299  HW1 HOH X1076      17.552  15.435  25.900  0.00  0.00            
ATOM   3300  HW2 HOH X1076      18.896  15.228  26.565  0.00  0.00            
ATOM   3301  OW  HOH X1077      39.053   2.759  39.711  0.00  0.00            
ATOM   3302  HW1 HOH X1077      39.904   2.948  40.107  0.00  0.00            
ATOM   3303  HW2 HOH X1077      38.421   2.925  40.411  0.00  0.00            
ATOM   3304  OW  HOH X1078      18.062  16.227  16.714  0.00  0.00            
ATOM   3305  HW1 HOH X1078      17.416  15.893  17.337  0.00  0.00            
ATOM   3306  HW2 HOH X1078      18.114  17.164  16.901  0.00  0.00            
ATOM   3307  OW  HOH X1079      12.658  21.717  12.642  0.00  0.00            
ATOM   3308  HW1 HOH X1079      13.171  21.132  13.199  0.00  0.00            
ATOM   3309  HW2 HOH X1079      12.200  22.291  13.255  0.00  0.00            
ATOM   3310  OW  HOH X1080      40.282  12.605  35.446  0.00  0.00            
ATOM   3311  HW1 HOH X1080      39.430  12.956  35.707  0.00  0.00            
ATOM   3312  HW2 HOH X1080      40.352  12.814  34.515  0.00  0.00            
ATOM   3313  OW  HOH X1081      40.353  19.333  20.455  0.00  0.00            
ATOM   3314  HW1 HOH X1081      39.607  19.890  20.679  0.00  0.00            
ATOM   3315  HW2 HOH X1081      40.812  19.813  19.766  0.00  0.00            
ATOM   3316  OW  HOH X1082      48.406   5.383  20.178  0.00  0.00            
ATOM   3317  HW1 HOH X1082      48.588   6.317  20.073  0.00  0.00            
ATOM   3318  HW2 HOH X1082      48.034   5.114  19.338  0.00  0.00            
ATOM   3319  OW  HOH X1083      15.567  11.822  20.927  0.00  0.00            
ATOM   3320  HW1 HOH X1083      15.556  11.800  19.970  0.00  0.00            
ATOM   3321  HW2 HOH X1083      16.278  12.425  21.145  0.00  0.00            
ATOM   3322  OW  HOH X1084      26.170  16.308  18.442  0.00  0.00            
ATOM   3323  HW1 HOH X1084      27.045  16.598  18.699  0.00  0.00            
ATOM   3324  HW2 HOH X1084      25.579  16.947  18.840  0.00  0.00            
ATOM   3325  OW  HOH X1085      11.628  -1.502  14.187  0.00  0.00            
ATOM   3326  HW1 HOH X1085      12.373  -1.618  13.598  0.00  0.00            
ATOM   3327  HW2 HOH X1085      11.290  -2.388  14.323  0.00  0.00            
ATOM   3328  OW  HOH X1086      32.830  13.505  38.479  0.00  0.00            
ATOM   3329  HW1 HOH X1086      33.268  12.899  39.077  0.00  0.00            
ATOM   3330  HW2 HOH X1086      33.441  14.236  38.389  0.00  0.00            
ATOM   3331  OW  HOH X1087      40.280  25.286  30.029  0.00  0.00            
ATOM   3332  HW1 HOH X1087      40.081  24.392  30.308  0.00  0.00            
ATOM   3333  HW2 HOH X1087      40.834  25.637  30.726  0.00  0.00            
ATOM   3334  OW  HOH X1088      38.202   1.369  18.379  0.00  0.00            
ATOM   3335  HW1 HOH X1088      38.586   1.032  19.188  0.00  0.00            
ATOM   3336  HW2 HOH X1088      38.289   2.320  18.450  0.00  0.00            
ATOM   3337  OW  HOH X1089      39.718   2.797  36.055  0.00  0.00            
ATOM   3338  HW1 HOH X1089      39.880   2.300  35.254  0.00  0.00            
ATOM   3339  HW2 HOH X1089      40.378   2.481  36.672  0.00  0.00            
ATOM   3340  OW  HOH X1090      21.159   1.332  10.384  0.00  0.00            
ATOM   3341  HW1 HOH X1090      20.429   0.793  10.077  0.00  0.00            
ATOM   3342  HW2 HOH X1090      20.742   2.093  10.788  0.00  0.00            
ATOM   3343  OW  HOH X1091      20.995   0.216   6.837  0.00  0.00            
ATOM   3344  HW1 HOH X1091      20.835   1.159   6.803  0.00  0.00            
ATOM   3345  HW2 HOH X1091      21.382   0.069   7.700  0.00  0.00            
ATOM   3346  OW  HOH X1092      27.302   2.344   8.355  0.00  0.00            
ATOM   3347  HW1 HOH X1092      28.110   2.705   7.989  0.00  0.00            
ATOM   3348  HW2 HOH X1092      27.573   1.940   9.180  0.00  0.00            
ATOM   3349  OW  HOH X1093      44.636  19.132  17.665  0.00  0.00            
ATOM   3350  HW1 HOH X1093      44.238  19.982  17.852  0.00  0.00            
ATOM   3351  HW2 HOH X1093      44.497  19.003  16.727  0.00  0.00            
ATOM   3352  OW  HOH X1094      18.886  17.236  14.306  0.00  0.00            
ATOM   3353  HW1 HOH X1094      18.854  16.586  15.008  0.00  0.00            
ATOM   3354  HW2 HOH X1094      19.338  16.791  13.588  0.00  0.00            
ATOM   3355  OW  HOH X1095      24.331  -5.927  18.218  0.00  0.00            
ATOM   3356  HW1 HOH X1095      24.304  -5.908  19.174  0.00  0.00            
ATOM   3357  HW2 HOH X1095      25.152  -6.374  18.010  0.00  0.00            
ATOM   3358  OW  HOH X1096      35.064   7.318  35.092  0.00  0.00            
ATOM   3359  HW1 HOH X1096      35.498   7.210  35.938  0.00  0.00            
ATOM   3360  HW2 HOH X1096      34.159   7.540  35.313  0.00  0.00            
ATOM   3361  OW  HOH X1097      28.469  13.249   8.374  0.00  0.00            
ATOM   3362  HW1 HOH X1097      28.114  14.107   8.141  0.00  0.00            
ATOM   3363  HW2 HOH X1097      28.882  13.384   9.227  0.00  0.00            
ATOM   3364  OW  HOH X1098      40.892  11.687  12.210  0.00  0.00            
ATOM   3365  HW1 HOH X1098      41.750  12.028  12.463  0.00  0.00            
ATOM   3366  HW2 HOH X1098      40.978  10.737  12.292  0.00  0.00            
ATOM   3367  OW  HOH X1099      19.698  -0.827   9.501  0.00  0.00            
ATOM   3368  HW1 HOH X1099      19.858  -1.750   9.305  0.00  0.00            
ATOM   3369  HW2 HOH X1099      19.061  -0.549   8.843  0.00  0.00            
ATOM   3370  OW  HOH X1100      24.211   8.407   7.814  0.00  0.00            
ATOM   3371  HW1 HOH X1100      23.416   8.064   7.407  0.00  0.00            
ATOM   3372  HW2 HOH X1100      23.895   8.945   8.540  0.00  0.00            
ATOM   3373  OW  HOH X1101      33.439  -4.510  26.961  0.00  0.00            
ATOM   3374  HW1 HOH X1101      33.483  -5.454  27.114  0.00  0.00            
ATOM   3375  HW2 HOH X1101      33.330  -4.130  27.833  0.00  0.00            
ATOM   3376  OW  HOH X1102      22.305  17.690  13.693  0.00  0.00            
ATOM   3377  HW1 HOH X1102      22.782  17.636  14.521  0.00  0.00            
ATOM   3378  HW2 HOH X1102      21.901  18.558  13.705  0.00  0.00            
ATOM   3379  OW  HOH X1103      19.104  14.232  10.869  0.00  0.00            
ATOM   3380  HW1 HOH X1103      18.875  14.631  10.030  0.00  0.00            
ATOM   3381  HW2 HOH X1103      19.289  14.974  11.445  0.00  0.00            
ATOM   3382  OW  HOH X1104      33.636  17.483  32.843  0.00  0.00            
ATOM   3383  HW1 HOH X1104      33.083  16.849  32.388  0.00  0.00            
ATOM   3384  HW2 HOH X1104      34.416  17.560  32.294  0.00  0.00            
ATOM   3385  OW  HOH X1105      41.579  11.952  18.833  0.00  0.00            
ATOM   3386  HW1 HOH X1105      40.697  11.598  18.946  0.00  0.00            
ATOM   3387  HW2 HOH X1105      41.441  12.868  18.590  0.00  0.00            
ATOM   3388  OW  HOH X1106      38.754  -3.650  23.762  0.00  0.00            
ATOM   3389  HW1 HOH X1106      38.154  -3.400  23.059  0.00  0.00            
ATOM   3390  HW2 HOH X1106      38.869  -4.594  23.655  0.00  0.00            
ATOM   3391  OW  HOH X1107      38.417   4.968  32.214  0.00  0.00            
ATOM   3392  HW1 HOH X1107      38.912   4.289  32.673  0.00  0.00            
ATOM   3393  HW2 HOH X1107      37.676   5.155  32.791  0.00  0.00            
ATOM   3394  OW  HOH X1108      27.193  -2.173  10.771  0.00  0.00            
ATOM   3395  HW1 HOH X1108      27.878  -2.777  11.057  0.00  0.00            
ATOM   3396  HW2 HOH X1108      26.449  -2.366  11.342  0.00  0.00            
ATOM   3397  OW  HOH X1109      27.768   2.726  33.338  0.00  0.00            
ATOM   3398  HW1 HOH X1109      27.409   2.784  34.224  0.00  0.00            
ATOM   3399  HW2 HOH X1109      27.229   3.325  32.822  0.00  0.00            
ATOM   3400  OW  HOH X1110      21.756  -2.861  11.663  0.00  0.00            
ATOM   3401  HW1 HOH X1110      21.583  -3.591  11.068  0.00  0.00            
ATOM   3402  HW2 HOH X1110      22.261  -3.248  12.378  0.00  0.00            
ATOM   3403  OW  HOH X1111      48.681  19.649  25.138  0.00  0.00            
ATOM   3404  HW1 HOH X1111      48.521  18.811  24.705  0.00  0.00            
ATOM   3405  HW2 HOH X1111      47.810  20.030  25.252  0.00  0.00            
ATOM   3406  OW  HOH X1112       9.424  -0.365  15.155  0.00  0.00            
ATOM   3407  HW1 HOH X1112       9.345  -1.137  15.715  0.00  0.00            
ATOM   3408  HW2 HOH X1112      10.222  -0.518  14.648  0.00  0.00            
ATOM   3409  OW  HOH X1113      24.795  13.738  12.598  0.00  0.00            
ATOM   3410  HW1 HOH X1113      23.873  13.504  12.704  0.00  0.00            
ATOM   3411  HW2 HOH X1113      24.778  14.634  12.262  0.00  0.00            
ATOM   3412  OW  HOH X1114      34.557  -4.321  16.978  0.00  0.00            
ATOM   3413  HW1 HOH X1114      34.870  -3.427  16.839  0.00  0.00            
ATOM   3414  HW2 HOH X1114      33.705  -4.347  16.542  0.00  0.00            
ATOM   3415  OW  HOH X1115      33.158   9.506   7.577  0.00  0.00            
ATOM   3416  HW1 HOH X1115      32.994   9.441   6.637  0.00  0.00            
ATOM   3417  HW2 HOH X1115      32.619  10.243   7.865  0.00  0.00            
ATOM   3418  OW  HOH X1116      35.087   3.174  40.418  0.00  0.00            
ATOM   3419  HW1 HOH X1116      35.180   2.625  39.640  0.00  0.00            
ATOM   3420  HW2 HOH X1116      34.379   2.767  40.917  0.00  0.00            
ATOM   3421  OW  HOH X1117      30.924   2.995  12.316  0.00  0.00            
ATOM   3422  HW1 HOH X1117      31.477   2.420  12.845  0.00  0.00            
ATOM   3423  HW2 HOH X1117      31.273   3.873  12.470  0.00  0.00            
ATOM   3424  OW  HOH X1118      37.011   6.619  41.557  0.00  0.00            
ATOM   3425  HW1 HOH X1118      37.499   6.270  42.302  0.00  0.00            
ATOM   3426  HW2 HOH X1118      37.146   5.976  40.860  0.00  0.00            
ATOM   3427  OW  HOH X1119      25.972   4.477  38.221  0.00  0.00            
ATOM   3428  HW1 HOH X1119      26.780   4.043  38.497  0.00  0.00            
ATOM   3429  HW2 HOH X1119      26.133   5.407  38.380  0.00  0.00            
ATOM   3430  OW  HOH X1120      23.051  10.800  30.941  0.00  0.00            
ATOM   3431  HW1 HOH X1120      23.830  10.687  31.486  0.00  0.00            
ATOM   3432  HW2 HOH X1120      23.383  11.164  30.120  0.00  0.00            
ATOM   3433  OW  HOH X1121      17.018  13.262  13.539  0.00  0.00            
ATOM   3434  HW1 HOH X1121      17.623  13.167  14.274  0.00  0.00            
ATOM   3435  HW2 HOH X1121      17.465  12.844  12.804  0.00  0.00            
ATOM   3436  OW  HOH X1122      49.615   7.760  15.302  0.00  0.00            
ATOM   3437  HW1 HOH X1122      48.789   7.670  15.777  0.00  0.00            
ATOM   3438  HW2 HOH X1122      50.215   7.162  15.749  0.00  0.00            
ATOM   3439  OW  HOH X1123      37.342  14.553  33.194  0.00  0.00            
ATOM   3440  HW1 HOH X1123      36.662  14.518  33.866  0.00  0.00            
ATOM   3441  HW2 HOH X1123      37.662  13.654  33.129  0.00  0.00            
ATOM   3442  OW  HOH X1124      35.807  25.016  29.240  0.00  0.00            
ATOM   3443  HW1 HOH X1124      36.535  25.124  28.628  0.00  0.00            
ATOM   3444  HW2 HOH X1124      35.504  25.907  29.414  0.00  0.00            
ATOM   3445  OW  HOH X1125      12.274  12.362  13.362  0.00  0.00            
ATOM   3446  HW1 HOH X1125      12.559  13.181  12.958  0.00  0.00            
ATOM   3447  HW2 HOH X1125      12.985  11.746  13.184  0.00  0.00            
ATOM   3448  OW  HOH X1126      20.211  10.390  16.212  0.00  0.00            
ATOM   3449  HW1 HOH X1126      20.887   9.851  16.624  0.00  0.00            
ATOM   3450  HW2 HOH X1126      19.408   9.878  16.305  0.00  0.00            
ATOM   3451  OW  HOH X1127      14.889   3.063  19.918  0.00  0.00            
ATOM   3452  HW1 HOH X1127      14.814   3.902  20.373  0.00  0.00            
ATOM   3453  HW2 HOH X1127      15.649   3.167  19.345  0.00  0.00            
ATOM   3454  OW  HOH X1128      17.311  21.170  13.793  0.00  0.00            
ATOM   3455  HW1 HOH X1128      17.194  21.389  12.868  0.00  0.00            
ATOM   3456  HW2 HOH X1128      16.762  20.398  13.928  0.00  0.00            
ATOM   3457  OW  HOH X1129      40.029  -1.967  37.376  0.00  0.00            
ATOM   3458  HW1 HOH X1129      39.706  -1.285  36.788  0.00  0.00            
ATOM   3459  HW2 HOH X1129      39.871  -1.622  38.254  0.00  0.00            
ATOM   3460  OW  HOH X1130      14.873  17.808  16.757  0.00  0.00            
ATOM   3461  HW1 HOH X1130      14.338  17.668  17.538  0.00  0.00            
ATOM   3462  HW2 HOH X1130      15.121  16.928  16.474  0.00  0.00            
ATOM   3463  OW  HOH X1131      23.098  12.176  28.407  0.00  0.00            
ATOM   3464  HW1 HOH X1131      22.499  11.470  28.165  0.00  0.00            
ATOM   3465  HW2 HOH X1131      22.876  12.893  27.813  0.00  0.00            
ATOM   3466  OW  HOH X1132      35.120   3.230  20.007  0.00  0.00            
ATOM   3467  HW1 HOH X1132      35.282   2.626  20.731  0.00  0.00            
ATOM   3468  HW2 HOH X1132      35.992   3.502  19.722  0.00  0.00            
ATOM   3469  OW  HOH X1133      51.938   7.308  18.811  0.00  0.00            
ATOM   3470  HW1 HOH X1133      52.887   7.210  18.736  0.00  0.00            
ATOM   3471  HW2 HOH X1133      51.588   6.849  18.047  0.00  0.00            
ATOM   3472  OW  HOH X1134      25.147  20.998  17.575  0.00  0.00            
ATOM   3473  HW1 HOH X1134      25.108  20.141  17.999  0.00  0.00            
ATOM   3474  HW2 HOH X1134      24.508  21.530  18.050  0.00  0.00            
ATOM   3475  OW  HOH X1135      26.112  22.778  23.942  0.00  0.00            
ATOM   3476  HW1 HOH X1135      27.012  22.761  23.617  0.00  0.00            
ATOM   3477  HW2 HOH X1135      26.156  22.343  24.794  0.00  0.00            
ATOM   3478  OW  HOH X1136      29.736  10.865  38.337  0.00  0.00            
ATOM   3479  HW1 HOH X1136      30.079  11.243  39.146  0.00  0.00            
ATOM   3480  HW2 HOH X1136      30.338  11.166  37.657  0.00  0.00            
ATOM   3481  OW  HOH X1137      28.274  -1.733  21.954  0.00  0.00            
ATOM   3482  HW1 HOH X1137      29.152  -1.420  21.737  0.00  0.00            
ATOM   3483  HW2 HOH X1137      28.287  -2.662  21.728  0.00  0.00            
ATOM   3484  OW  HOH X1138      39.375  29.380  29.997  0.00  0.00            
ATOM   3485  HW1 HOH X1138      39.275  28.483  29.677  0.00  0.00            
ATOM   3486  HW2 HOH X1138      40.054  29.321  30.669  0.00  0.00            
ATOM   3487  OW  HOH X1139      27.130   3.689  35.757  0.00  0.00            
ATOM   3488  HW1 HOH X1139      27.605   3.342  36.512  0.00  0.00            
ATOM   3489  HW2 HOH X1139      26.445   4.239  36.137  0.00  0.00            
ATOM   3490  OW  HOH X1140      15.104   8.488  20.623  0.00  0.00            
ATOM   3491  HW1 HOH X1140      16.018   8.556  20.899  0.00  0.00            
ATOM   3492  HW2 HOH X1140      14.855   9.384  20.396  0.00  0.00            
ATOM   3493  OW  HOH X1141      34.551   9.655  38.390  0.00  0.00            
ATOM   3494  HW1 HOH X1141      33.985   9.632  37.619  0.00  0.00            
ATOM   3495  HW2 HOH X1141      35.148   8.917  38.271  0.00  0.00            
ATOM   3496  OW  HOH X1142      32.251   6.518  32.232  0.00  0.00            
ATOM   3497  HW1 HOH X1142      31.462   6.260  31.756  0.00  0.00            
ATOM   3498  HW2 HOH X1142      32.398   5.808  32.857  0.00  0.00            
ATOM   3499  OW  HOH X1143      15.863  -0.787   6.611  0.00  0.00            
ATOM   3500  HW1 HOH X1143      14.956  -1.085   6.556  0.00  0.00            
ATOM   3501  HW2 HOH X1143      16.266  -1.091   5.798  0.00  0.00            
ATOM   3502  OW  HOH X1144      12.494   8.584  12.393  0.00  0.00            
ATOM   3503  HW1 HOH X1144      11.913   7.853  12.181  0.00  0.00            
ATOM   3504  HW2 HOH X1144      11.916   9.345  12.439  0.00  0.00            
ATOM   3505  OW  HOH X1145      32.860   3.055  28.138  0.00  0.00            
ATOM   3506  HW1 HOH X1145      32.145   2.424  28.053  0.00  0.00            
ATOM   3507  HW2 HOH X1145      32.583   3.639  28.844  0.00  0.00            
ATOM   3508  OW  HOH X1146      39.375  -9.947  25.400  0.00  0.00            
ATOM   3509  HW1 HOH X1146      39.703 -10.574  26.044  0.00  0.00            
ATOM   3510  HW2 HOH X1146      39.819  -9.127  25.615  0.00  0.00            
ATOM   3511  OW  HOH X1147      15.924  12.609   7.572  0.00  0.00            
ATOM   3512  HW1 HOH X1147      15.072  12.172   7.563  0.00  0.00            
ATOM   3513  HW2 HOH X1147      16.513  11.994   7.135  0.00  0.00            
ATOM   3514  OW  HOH X1148      42.677   0.780  28.998  0.00  0.00            
ATOM   3515  HW1 HOH X1148      42.468   1.687  28.777  0.00  0.00            
ATOM   3516  HW2 HOH X1148      43.208   0.841  29.792  0.00  0.00            
ATOM   3517  OW  HOH X1149      12.360   8.176  29.807  0.00  0.00            
ATOM   3518  HW1 HOH X1149      12.902   7.818  29.104  0.00  0.00            
ATOM   3519  HW2 HOH X1149      11.601   7.595  29.846  0.00  0.00            
ATOM   3520  OW  HOH X1150      20.530  14.524  16.668  0.00  0.00            
ATOM   3521  HW1 HOH X1150      19.671  14.944  16.711  0.00  0.00            
ATOM   3522  HW2 HOH X1150      20.963  14.781  17.481  0.00  0.00            
ATOM   3523  OW  HOH X1151      14.938  20.503   6.540  0.00  0.00            
ATOM   3524  HW1 HOH X1151      15.893  20.507   6.607  0.00  0.00            
ATOM   3525  HW2 HOH X1151      14.639  20.217   7.403  0.00  0.00            
ATOM   3526  OW  HOH X1152       4.973   2.481  23.028  0.00  0.00            
ATOM   3527  HW1 HOH X1152       5.070   2.052  23.878  0.00  0.00            
ATOM   3528  HW2 HOH X1152       5.505   3.274  23.098  0.00  0.00            
ATOM   3529  OW  HOH X1153      33.621  17.078   9.383  0.00  0.00            
ATOM   3530  HW1 HOH X1153      33.223  16.264   9.694  0.00  0.00            
ATOM   3531  HW2 HOH X1153      33.213  17.234   8.531  0.00  0.00            
ATOM   3532  OW  HOH X1154      21.367   4.681  22.978  0.00  0.00            
ATOM   3533  HW1 HOH X1154      20.612   4.512  22.415  0.00  0.00            
ATOM   3534  HW2 HOH X1154      21.273   5.599  23.236  0.00  0.00            
ATOM   3535  OW  HOH X1155      47.197   4.704  22.494  0.00  0.00            
ATOM   3536  HW1 HOH X1155      47.746   4.782  21.713  0.00  0.00            
ATOM   3537  HW2 HOH X1155      46.463   4.155  22.218  0.00  0.00            
ATOM   3538  OW  HOH X1156      21.903  14.000  26.892  0.00  0.00            
ATOM   3539  HW1 HOH X1156      21.092  13.692  27.296  0.00  0.00            
ATOM   3540  HW2 HOH X1156      21.664  14.826  26.473  0.00  0.00            
ATOM   3541  OW  HOH X1157      24.621  -2.794  20.677  0.00  0.00            
ATOM   3542  HW1 HOH X1157      25.092  -2.841  21.509  0.00  0.00            
ATOM   3543  HW2 HOH X1157      23.866  -2.236  20.859  0.00  0.00            
ATOM   3544  OW  HOH X1158      22.651   1.376  28.180  0.00  0.00            
ATOM   3545  HW1 HOH X1158      22.551   2.190  28.675  0.00  0.00            
ATOM   3546  HW2 HOH X1158      22.086   1.489  27.416  0.00  0.00            
ATOM   3547  OW  HOH X1159      37.852  -5.155  32.290  0.00  0.00            
ATOM   3548  HW1 HOH X1159      38.472  -5.820  31.990  0.00  0.00            
ATOM   3549  HW2 HOH X1159      37.144  -5.653  32.698  0.00  0.00            
ATOM   3550  OW  HOH X1160      25.018   6.492  17.434  0.00  0.00            
ATOM   3551  HW1 HOH X1160      25.556   7.257  17.236  0.00  0.00            
ATOM   3552  HW2 HOH X1160      25.586   5.927  17.957  0.00  0.00            
ATOM   3553  OW  HOH X1161      29.248  -4.753  13.805  0.00  0.00            
ATOM   3554  HW1 HOH X1161      29.834  -5.222  13.211  0.00  0.00            
ATOM   3555  HW2 HOH X1161      29.583  -4.952  14.679  0.00  0.00            
ATOM   3556  OW  HOH X1162      42.510   7.399  26.407  0.00  0.00            
ATOM   3557  HW1 HOH X1162      42.569   6.510  26.756  0.00  0.00            
ATOM   3558  HW2 HOH X1162      41.754   7.782  26.853  0.00  0.00            
ATOM   3559  OW  HOH X1163      13.789   7.639   8.789  0.00  0.00            
ATOM   3560  HW1 HOH X1163      13.354   7.282   8.014  0.00  0.00            
ATOM   3561  HW2 HOH X1163      14.683   7.822   8.500  0.00  0.00            
ATOM   3562  OW  HOH X1164      42.024  19.913  35.694  0.00  0.00            
ATOM   3563  HW1 HOH X1164      42.094  19.003  35.405  0.00  0.00            
ATOM   3564  HW2 HOH X1164      41.223  20.235  35.281  0.00  0.00            
ATOM   3565  OW  HOH X1165      41.193  22.598  34.606  0.00  0.00            
ATOM   3566  HW1 HOH X1165      40.957  23.225  33.923  0.00  0.00            
ATOM   3567  HW2 HOH X1165      40.455  22.617  35.215  0.00  0.00            
ATOM   3568  OW  HOH X1166      37.254  -3.489  34.697  0.00  0.00            
ATOM   3569  HW1 HOH X1166      37.408  -3.819  33.812  0.00  0.00            
ATOM   3570  HW2 HOH X1166      36.838  -4.218  35.156  0.00  0.00            
ATOM   3571  OW  HOH X1167      26.128   4.512  32.253  0.00  0.00            
ATOM   3572  HW1 HOH X1167      25.911   5.156  31.579  0.00  0.00            
ATOM   3573  HW2 HOH X1167      25.528   4.707  32.973  0.00  0.00            
ATOM   3574  OW  HOH X1168      44.162  11.710  15.047  0.00  0.00            
ATOM   3575  HW1 HOH X1168      44.079  12.610  14.733  0.00  0.00            
ATOM   3576  HW2 HOH X1168      44.241  11.184  14.251  0.00  0.00            
ATOM   3577  OW  HOH X1169      15.816  23.661   8.888  0.00  0.00            
ATOM   3578  HW1 HOH X1169      15.311  23.346   9.638  0.00  0.00            
ATOM   3579  HW2 HOH X1169      16.275  22.885   8.565  0.00  0.00            
ATOM   3580  OW  HOH X1170      41.365  13.117   9.502  0.00  0.00            
ATOM   3581  HW1 HOH X1170      42.028  13.295  10.169  0.00  0.00            
ATOM   3582  HW2 HOH X1170      41.563  12.232   9.196  0.00  0.00            
ATOM   3583  OW  HOH X1171      25.527   0.295  21.605  0.00  0.00            
ATOM   3584  HW1 HOH X1171      25.998   1.126  21.539  0.00  0.00            
ATOM   3585  HW2 HOH X1171      25.593   0.053  22.528  0.00  0.00            
ATOM   3586  OW  HOH X1172      32.099  20.495  15.117  0.00  0.00            
ATOM   3587  HW1 HOH X1172      32.446  19.748  14.629  0.00  0.00            
ATOM   3588  HW2 HOH X1172      32.850  21.075  15.235  0.00  0.00            
ATOM   3589  OW  HOH X1173      36.951   7.081  28.155  0.00  0.00            
ATOM   3590  HW1 HOH X1173      36.278   6.411  28.278  0.00  0.00            
ATOM   3591  HW2 HOH X1173      37.739   6.589  27.925  0.00  0.00            
ATOM   3592  OW  HOH X1174      38.886  22.867  19.674  0.00  0.00            
ATOM   3593  HW1 HOH X1174      39.544  23.407  19.236  0.00  0.00            
ATOM   3594  HW2 HOH X1174      38.295  22.594  18.972  0.00  0.00            
ATOM   3595  OW  HOH X1175      26.462   4.783  24.306  0.00  0.00            
ATOM   3596  HW1 HOH X1175      25.708   4.703  23.722  0.00  0.00            
ATOM   3597  HW2 HOH X1175      26.316   5.604  24.776  0.00  0.00            
ATOM   3598  OW  HOH X1176      32.487   3.776  41.937  0.00  0.00            
ATOM   3599  HW1 HOH X1176      32.265   4.063  42.823  0.00  0.00            
ATOM   3600  HW2 HOH X1176      33.181   4.373  41.658  0.00  0.00            
ATOM   3601  OW  HOH X1177      31.597   8.334  43.416  0.00  0.00            
ATOM   3602  HW1 HOH X1177      32.529   8.227  43.608  0.00  0.00            
ATOM   3603  HW2 HOH X1177      31.250   7.442  43.408  0.00  0.00            
ATOM   3604  OW  HOH X1178      19.223  17.447  20.800  0.00  0.00            
ATOM   3605  HW1 HOH X1178      19.925  18.097  20.782  0.00  0.00            
ATOM   3606  HW2 HOH X1178      19.084  17.270  21.731  0.00  0.00            
ATOM   3607  OW  HOH X1179      35.474  12.295   6.713  0.00  0.00            
ATOM   3608  HW1 HOH X1179      35.715  12.993   7.323  0.00  0.00            
ATOM   3609  HW2 HOH X1179      35.132  12.755   5.946  0.00  0.00            
ATOM   3610  OW  HOH X1180      29.012  11.927   3.235  0.00  0.00            
ATOM   3611  HW1 HOH X1180      29.959  12.038   3.142  0.00  0.00            
ATOM   3612  HW2 HOH X1180      28.829  12.180   4.140  0.00  0.00            
ATOM   3613  OW  HOH X1181      28.799  19.553  26.208  0.00  0.00            
ATOM   3614  HW1 HOH X1181      28.785  18.933  26.937  0.00  0.00            
ATOM   3615  HW2 HOH X1181      29.071  19.031  25.454  0.00  0.00            
ATOM   3616  OW  HOH X1182      33.126  15.286  27.635  0.00  0.00            
ATOM   3617  HW1 HOH X1182      32.404  14.659  27.584  0.00  0.00            
ATOM   3618  HW2 HOH X1182      33.854  14.851  27.192  0.00  0.00            
ATOM   3619  OW  HOH X1183      36.645  19.595  18.809  0.00  0.00            
ATOM   3620  HW1 HOH X1183      36.906  19.512  19.727  0.00  0.00            
ATOM   3621  HW2 HOH X1183      37.375  19.218  18.318  0.00  0.00            
ATOM   3622  OW  HOH X1184      42.257   8.255  21.173  0.00  0.00            
ATOM   3623  HW1 HOH X1184      41.909   7.602  20.565  0.00  0.00            
ATOM   3624  HW2 HOH X1184      43.136   7.941  21.385  0.00  0.00            
ATOM   3625  OW  HOH X1185      12.511  27.375  13.680  0.00  0.00            
ATOM   3626  HW1 HOH X1185      12.481  28.022  14.385  0.00  0.00            
ATOM   3627  HW2 HOH X1185      13.439  27.158  13.593  0.00  0.00            
ATOM   3628  OW  HOH X1186      16.977  -2.341   8.341  0.00  0.00            
ATOM   3629  HW1 HOH X1186      17.033  -3.061   7.713  0.00  0.00            
ATOM   3630  HW2 HOH X1186      16.469  -1.668   7.889  0.00  0.00            
ATOM   3631  OW  HOH X1187      51.798  12.142  14.109  0.00  0.00            
ATOM   3632  HW1 HOH X1187      51.456  12.120  15.003  0.00  0.00            
ATOM   3633  HW2 HOH X1187      51.108  11.745  13.578  0.00  0.00            
ATOM   3634  OW  HOH X1188      35.571   2.595  34.984  0.00  0.00            
ATOM   3635  HW1 HOH X1188      35.714   1.661  35.139  0.00  0.00            
ATOM   3636  HW2 HOH X1188      36.128   3.033  35.626  0.00  0.00            
ATOM   3637  OW  HOH X1189      21.559   5.976  10.951  0.00  0.00            
ATOM   3638  HW1 HOH X1189      22.454   5.638  10.956  0.00  0.00            
ATOM   3639  HW2 HOH X1189      21.433   6.337  11.829  0.00  0.00            
ATOM   3640  OW  HOH X1190      26.548  -2.921  16.527  0.00  0.00            
ATOM   3641  HW1 HOH X1190      26.849  -3.291  17.357  0.00  0.00            
ATOM   3642  HW2 HOH X1190      26.115  -2.103  16.772  0.00  0.00            
ATOM   3643  OW  HOH X1191      37.436  17.592  16.059  0.00  0.00            
ATOM   3644  HW1 HOH X1191      36.782  17.004  16.437  0.00  0.00            
ATOM   3645  HW2 HOH X1191      38.060  17.745  16.768  0.00  0.00            
ATOM   3646  OW  HOH X1192      16.986   8.202  34.833  0.00  0.00            
ATOM   3647  HW1 HOH X1192      17.694   7.883  34.273  0.00  0.00            
ATOM   3648  HW2 HOH X1192      16.572   7.409  35.174  0.00  0.00            
ATOM   3649  OW  HOH X1193      36.815  26.978  27.213  0.00  0.00            
ATOM   3650  HW1 HOH X1193      35.908  27.029  27.515  0.00  0.00            
ATOM   3651  HW2 HOH X1193      36.800  26.324  26.515  0.00  0.00            
ATOM   3652  OW  HOH X1194      11.019   8.696  20.417  0.00  0.00            
ATOM   3653  HW1 HOH X1194      11.596   9.456  20.346  0.00  0.00            
ATOM   3654  HW2 HOH X1194      10.520   8.847  21.220  0.00  0.00            
ATOM   3655  OW  HOH X1195      30.953  12.026  -0.163  0.00  0.00            
ATOM   3656  HW1 HOH X1195      30.295  12.334  -0.786  0.00  0.00            
ATOM   3657  HW2 HOH X1195      31.542  11.481  -0.685  0.00  0.00            
END
