# Supplementary material for: Evolution of cation binding in the active sites of P-loop nucleoside triphosphatases in relation to the basic catalytic mechanism
Source: eLife journal article supplement (doi:10.7554/elife.37373), 2018-12-11
Supplement: supp [file elife-37373-supp-v1.zip › elife_poa_e37373_Figure_7_source_data_2.txt]

CRYST1   66.550   66.320   77.127  90.00  90.00  90.00 P 1           1
ATOM      1  N   GLY X 216      59.405  36.413  42.919  0.00  0.00            
ATOM      2  H1  GLY X 216      60.434  36.422  43.071  0.00  0.00            
ATOM      3  H2  GLY X 216      59.119  37.391  43.129  0.00  0.00            
ATOM      4  H3  GLY X 216      59.273  36.196  41.911  0.00  0.00            
ATOM      5  CA  GLY X 216      58.824  35.435  43.854  0.00  0.00            
ATOM      6  HA1 GLY X 216      58.014  35.959  44.338  0.00  0.00            
ATOM      7  HA2 GLY X 216      59.601  35.319  44.595  0.00  0.00            
ATOM      8  C   GLY X 216      58.399  34.185  43.326  0.00  0.00            
ATOM      9  O   GLY X 216      58.202  34.081  42.083  0.00  0.00            
ATOM     10  N   MET X 217      58.245  33.141  44.157  0.00  0.00            
ATOM     11  HN  MET X 217      58.482  33.331  45.106  0.00  0.00            
ATOM     12  CA  MET X 217      57.747  31.790  43.676  0.00  0.00            
ATOM     13  HA  MET X 217      58.540  31.393  43.060  0.00  0.00            
ATOM     14  CB  MET X 217      57.667  30.719  44.770  0.00  0.00            
ATOM     15  HB1 MET X 217      57.292  29.759  44.356  0.00  0.00            
ATOM     16  HB2 MET X 217      56.815  31.026  45.414  0.00  0.00            
ATOM     17  CG  MET X 217      59.056  30.511  45.431  0.00  0.00            
ATOM     18  HG1 MET X 217      59.126  31.376  46.125  0.00  0.00            
ATOM     19  HG2 MET X 217      59.806  30.553  44.612  0.00  0.00            
ATOM     20  SD  MET X 217      59.303  28.932  46.365  0.00  0.00            
ATOM     21  CE  MET X 217      58.250  29.491  47.746  0.00  0.00            
ATOM     22  HE1 MET X 217      58.210  28.755  48.578  0.00  0.00            
ATOM     23  HE2 MET X 217      58.479  30.449  48.260  0.00  0.00            
ATOM     24  HE3 MET X 217      57.204  29.459  47.374  0.00  0.00            
ATOM     25  C   MET X 217      56.565  31.776  42.720  0.00  0.00            
ATOM     26  O   MET X 217      55.604  32.626  42.893  0.00  0.00            
ATOM     27  N   LYS X 218      56.436  30.859  41.789  0.00  0.00            
ATOM     28  HN  LYS X 218      57.127  30.151  41.666  0.00  0.00            
ATOM     29  CA  LYS X 218      55.367  30.835  40.800  0.00  0.00            
ATOM     30  HA  LYS X 218      55.058  31.861  40.663  0.00  0.00            
ATOM     31  CB  LYS X 218      55.914  30.157  39.451  0.00  0.00            
ATOM     32  HB1 LYS X 218      55.081  29.986  38.735  0.00  0.00            
ATOM     33  HB2 LYS X 218      56.294  29.142  39.692  0.00  0.00            
ATOM     34  CG  LYS X 218      56.900  30.922  38.539  0.00  0.00            
ATOM     35  HG1 LYS X 218      57.912  31.088  38.967  0.00  0.00            
ATOM     36  HG2 LYS X 218      56.393  31.894  38.361  0.00  0.00            
ATOM     37  CD  LYS X 218      57.223  30.280  37.173  0.00  0.00            
ATOM     38  HD1 LYS X 218      57.687  29.279  37.306  0.00  0.00            
ATOM     39  HD2 LYS X 218      57.961  30.932  36.657  0.00  0.00            
ATOM     40  CE  LYS X 218      55.925  30.234  36.321  0.00  0.00            
ATOM     41  HE1 LYS X 218      55.514  31.242  36.543  0.00  0.00            
ATOM     42  HE2 LYS X 218      55.225  29.427  36.625  0.00  0.00            
ATOM     43  NZ  LYS X 218      56.243  30.204  34.910  0.00  0.00            
ATOM     44  HZ1 LYS X 218      56.942  29.444  34.791  0.00  0.00            
ATOM     45  HZ2 LYS X 218      56.698  31.094  34.623  0.00  0.00            
ATOM     46  HZ3 LYS X 218      55.378  30.103  34.342  0.00  0.00            
ATOM     47  C   LYS X 218      54.205  29.971  41.304  0.00  0.00            
ATOM     48  O   LYS X 218      54.228  28.757  41.209  0.00  0.00            
ATOM     49  N   VAL X 219      53.082  30.631  41.806  0.00  0.00            
ATOM     50  HN  VAL X 219      53.072  31.622  41.701  0.00  0.00            
ATOM     51  CA  VAL X 219      51.868  29.966  42.349  0.00  0.00            
ATOM     52  HA  VAL X 219      52.061  28.908  42.448  0.00  0.00            
ATOM     53  CB  VAL X 219      51.454  30.545  43.729  0.00  0.00            
ATOM     54  HB  VAL X 219      50.985  31.526  43.497  0.00  0.00            
ATOM     55  CG1 VAL X 219      50.482  29.585  44.385  0.00  0.00            
ATOM     56 HG11 VAL X 219      50.827  28.531  44.326  0.00  0.00            
ATOM     57 HG12 VAL X 219      50.262  29.996  45.394  0.00  0.00            
ATOM     58 HG13 VAL X 219      49.550  29.523  43.784  0.00  0.00            
ATOM     59  CG2 VAL X 219      52.650  30.687  44.721  0.00  0.00            
ATOM     60 HG21 VAL X 219      53.252  31.597  44.511  0.00  0.00            
ATOM     61 HG22 VAL X 219      53.222  29.741  44.834  0.00  0.00            
ATOM     62 HG23 VAL X 219      52.281  30.820  45.760  0.00  0.00            
ATOM     63  C   VAL X 219      50.730  30.115  41.378  0.00  0.00            
ATOM     64  O   VAL X 219      50.059  31.163  41.184  0.00  0.00            
ATOM     65  N   VAL X 220      50.417  28.976  40.731  0.00  0.00            
ATOM     66  HN  VAL X 220      50.876  28.133  41.003  0.00  0.00            
ATOM     67  CA  VAL X 220      49.521  28.934  39.538  0.00  0.00            
ATOM     68  HA  VAL X 220      49.345  29.908  39.107  0.00  0.00            
ATOM     69  CB  VAL X 220      50.183  28.033  38.485  0.00  0.00            
ATOM     70  HB  VAL X 220      50.221  26.999  38.890  0.00  0.00            
ATOM     71  CG1 VAL X 220      49.296  27.822  37.238  0.00  0.00            
ATOM     72 HG11 VAL X 220      49.404  28.722  36.597  0.00  0.00            
ATOM     73 HG12 VAL X 220      49.612  27.040  36.515  0.00  0.00            
ATOM     74 HG13 VAL X 220      48.228  27.599  37.445  0.00  0.00            
ATOM     75  CG2 VAL X 220      51.578  28.517  38.095  0.00  0.00            
ATOM     76 HG21 VAL X 220      52.031  28.053  37.193  0.00  0.00            
ATOM     77 HG22 VAL X 220      52.381  28.250  38.816  0.00  0.00            
ATOM     78 HG23 VAL X 220      51.565  29.590  37.806  0.00  0.00            
ATOM     79  C   VAL X 220      48.204  28.338  39.826  0.00  0.00            
ATOM     80  O   VAL X 220      48.066  27.283  40.448  0.00  0.00            
ATOM     81  N   ILE X 221      47.162  29.114  39.496  0.00  0.00            
ATOM     82  HN  ILE X 221      47.484  29.971  39.100  0.00  0.00            
ATOM     83  CA  ILE X 221      45.738  28.772  39.641  0.00  0.00            
ATOM     84  HA  ILE X 221      45.631  28.154  40.521  0.00  0.00            
ATOM     85  CB  ILE X 221      44.828  30.064  39.738  0.00  0.00            
ATOM     86  HB  ILE X 221      44.911  30.737  38.858  0.00  0.00            
ATOM     87  CG2 ILE X 221      43.334  29.609  40.012  0.00  0.00            
ATOM     88 HG21 ILE X 221      42.689  30.494  40.196  0.00  0.00            
ATOM     89 HG22 ILE X 221      43.273  28.913  40.876  0.00  0.00            
ATOM     90 HG23 ILE X 221      42.932  29.082  39.120  0.00  0.00            
ATOM     91  CG1 ILE X 221      45.170  30.929  41.008  0.00  0.00            
ATOM     92 HG11 ILE X 221      46.279  30.945  41.064  0.00  0.00            
ATOM     93 HG12 ILE X 221      44.720  30.452  41.905  0.00  0.00            
ATOM     94  CD  ILE X 221      44.788  32.409  40.956  0.00  0.00            
ATOM     95  HD1 ILE X 221      43.818  32.438  40.415  0.00  0.00            
ATOM     96  HD2 ILE X 221      45.518  32.944  40.311  0.00  0.00            
ATOM     97  HD3 ILE X 221      44.789  32.967  41.916  0.00  0.00            
ATOM     98  C   ILE X 221      45.318  28.000  38.425  0.00  0.00            
ATOM     99  O   ILE X 221      45.481  28.472  37.271  0.00  0.00            
ATOM    100  N   ALA X 222      44.718  26.781  38.589  0.00  0.00            
ATOM    101  HN  ALA X 222      44.544  26.393  39.490  0.00  0.00            
ATOM    102  CA  ALA X 222      44.362  26.032  37.424  0.00  0.00            
ATOM    103  HA  ALA X 222      44.037  26.706  36.646  0.00  0.00            
ATOM    104  CB  ALA X 222      45.550  25.084  37.073  0.00  0.00            
ATOM    105  HB1 ALA X 222      45.901  24.506  37.955  0.00  0.00            
ATOM    106  HB2 ALA X 222      46.341  25.757  36.678  0.00  0.00            
ATOM    107  HB3 ALA X 222      45.359  24.321  36.288  0.00  0.00            
ATOM    108  C   ALA X 222      43.128  25.152  37.712  0.00  0.00            
ATOM    109  O   ALA X 222      43.007  24.694  38.874  0.00  0.00            
ATOM    110  N   GLY X 223      42.221  25.084  36.739  0.00  0.00            
ATOM    111  HN  GLY X 223      42.393  25.422  35.817  0.00  0.00            
ATOM    112  CA  GLY X 223      40.964  24.249  36.873  0.00  0.00            
ATOM    113  HA1 GLY X 223      40.279  24.576  37.641  0.00  0.00            
ATOM    114  HA2 GLY X 223      41.299  23.224  36.938  0.00  0.00            
ATOM    115  C   GLY X 223      40.161  24.390  35.623  0.00  0.00            
ATOM    116  O   GLY X 223      40.551  24.938  34.613  0.00  0.00            
ATOM    117  N   ARG X 224      38.886  23.985  35.623  0.00  0.00            
ATOM    118  HN  ARG X 224      38.426  23.441  36.320  0.00  0.00            
ATOM    119  CA  ARG X 224      37.871  24.069  34.567  0.00  0.00            
ATOM    120  HA  ARG X 224      38.307  23.601  33.697  0.00  0.00            
ATOM    121  CB  ARG X 224      36.815  23.080  35.052  0.00  0.00            
ATOM    122  HB1 ARG X 224      35.865  23.207  34.489  0.00  0.00            
ATOM    123  HB2 ARG X 224      36.716  23.262  36.143  0.00  0.00            
ATOM    124  CG  ARG X 224      37.318  21.596  34.760  0.00  0.00            
ATOM    125  HG1 ARG X 224      38.358  21.429  35.112  0.00  0.00            
ATOM    126  HG2 ARG X 224      37.361  21.461  33.658  0.00  0.00            
ATOM    127  CD  ARG X 224      36.305  20.583  35.238  0.00  0.00            
ATOM    128  HD1 ARG X 224      35.404  20.838  34.641  0.00  0.00            
ATOM    129  HD2 ARG X 224      36.166  20.625  36.340  0.00  0.00            
ATOM    130  NE  ARG X 224      36.757  19.198  34.729  0.00  0.00            
ATOM    131  HE  ARG X 224      37.572  19.102  34.157  0.00  0.00            
ATOM    132  CZ  ARG X 224      36.463  18.101  35.442  0.00  0.00            
ATOM    133  NH1 ARG X 224      35.604  18.176  36.479  0.00  0.00            
ATOM    134 HH11 ARG X 224      35.117  19.020  36.702  0.00  0.00            
ATOM    135 HH12 ARG X 224      35.447  17.343  37.009  0.00  0.00            
ATOM    136  NH2 ARG X 224      37.082  16.974  35.137  0.00  0.00            
ATOM    137 HH21 ARG X 224      37.678  16.934  34.335  0.00  0.00            
ATOM    138 HH22 ARG X 224      37.021  16.128  35.666  0.00  0.00            
ATOM    139  C   ARG X 224      37.325  25.448  34.186  0.00  0.00            
ATOM    140  O   ARG X 224      37.534  26.351  34.980  0.00  0.00            
ATOM    141  N   PRO X 225      36.724  25.688  33.020  0.00  0.00            
ATOM    142  CD  PRO X 225      36.669  24.727  31.923  0.00  0.00            
ATOM    143  HD1 PRO X 225      37.667  24.294  31.699  0.00  0.00            
ATOM    144  HD2 PRO X 225      35.870  23.966  32.056  0.00  0.00            
ATOM    145  CA  PRO X 225      36.042  26.932  32.641  0.00  0.00            
ATOM    146  HA  PRO X 225      36.872  27.622  32.676  0.00  0.00            
ATOM    147  CB  PRO X 225      35.453  26.634  31.256  0.00  0.00            
ATOM    148  HB1 PRO X 225      35.495  27.628  30.763  0.00  0.00            
ATOM    149  HB2 PRO X 225      34.383  26.336  31.279  0.00  0.00            
ATOM    150  CG  PRO X 225      36.345  25.542  30.702  0.00  0.00            
ATOM    151  HG1 PRO X 225      37.157  25.838  30.004  0.00  0.00            
ATOM    152  HG2 PRO X 225      35.635  24.889  30.150  0.00  0.00            
ATOM    153  C   PRO X 225      34.991  27.512  33.539  0.00  0.00            
ATOM    154  O   PRO X 225      34.129  26.737  33.899  0.00  0.00            
ATOM    155  N   ASN X 226      35.009  28.784  33.931  0.00  0.00            
ATOM    156  HN  ASN X 226      35.744  29.307  33.506  0.00  0.00            
ATOM    157  CA  ASN X 226      34.058  29.432  34.763  0.00  0.00            
ATOM    158  HA  ASN X 226      34.432  30.445  34.802  0.00  0.00            
ATOM    159  CB  ASN X 226      32.636  29.409  34.090  0.00  0.00            
ATOM    160  HB1 ASN X 226      31.893  28.747  34.582  0.00  0.00            
ATOM    161  HB2 ASN X 226      32.710  29.050  33.042  0.00  0.00            
ATOM    162  CG  ASN X 226      32.006  30.805  33.982  0.00  0.00            
ATOM    163  OD1 ASN X 226      30.925  31.123  34.441  0.00  0.00            
ATOM    164  ND2 ASN X 226      32.690  31.721  33.249  0.00  0.00            
ATOM    165 HD21 ASN X 226      33.561  31.434  32.850  0.00  0.00            
ATOM    166 HD22 ASN X 226      32.159  32.551  33.077  0.00  0.00            
ATOM    167  C   ASN X 226      34.119  29.033  36.235  0.00  0.00            
ATOM    168  O   ASN X 226      33.115  28.775  36.898  0.00  0.00            
ATOM    169  N   ALA X 227      35.237  28.874  36.821  0.00  0.00            
ATOM    170  HN  ALA X 227      36.071  29.205  36.386  0.00  0.00            
ATOM    171  CA  ALA X 227      35.274  28.248  38.158  0.00  0.00            
ATOM    172  HA  ALA X 227      34.329  27.826  38.467  0.00  0.00            
ATOM    173  CB  ALA X 227      36.427  27.288  38.182  0.00  0.00            
ATOM    174  HB1 ALA X 227      36.080  26.374  37.654  0.00  0.00            
ATOM    175  HB2 ALA X 227      36.712  26.989  39.214  0.00  0.00            
ATOM    176  HB3 ALA X 227      37.272  27.590  37.528  0.00  0.00            
ATOM    177  C   ALA X 227      35.560  29.394  39.134  0.00  0.00            
ATOM    178  O   ALA X 227      35.402  29.257  40.358  0.00  0.00            
ATOM    179  N   GLY X 228      36.087  30.571  38.661  0.00  0.00            
ATOM    180  HN  GLY X 228      36.312  30.559  37.689  0.00  0.00            
ATOM    181  CA  GLY X 228      36.260  31.788  39.423  0.00  0.00            
ATOM    182  HA1 GLY X 228      35.744  31.796  40.372  0.00  0.00            
ATOM    183  HA2 GLY X 228      35.824  32.572  38.821  0.00  0.00            
ATOM    184  C   GLY X 228      37.771  32.167  39.608  0.00  0.00            
ATOM    185  O   GLY X 228      38.254  32.804  40.550  0.00  0.00            
ATOM    186  N   LYS X 229      38.604  31.608  38.741  0.00  0.00            
ATOM    187  HN  LYS X 229      38.182  31.097  37.996  0.00  0.00            
ATOM    188  CA  LYS X 229      40.078  31.755  38.722  0.00  0.00            
ATOM    189  HA  LYS X 229      40.383  31.499  39.726  0.00  0.00            
ATOM    190  CB  LYS X 229      40.752  30.702  37.774  0.00  0.00            
ATOM    191  HB1 LYS X 229      41.820  30.656  38.076  0.00  0.00            
ATOM    192  HB2 LYS X 229      40.681  31.069  36.728  0.00  0.00            
ATOM    193  CG  LYS X 229      40.027  29.255  37.828  0.00  0.00            
ATOM    194  HG1 LYS X 229      38.943  29.474  37.716  0.00  0.00            
ATOM    195  HG2 LYS X 229      40.195  28.854  38.850  0.00  0.00            
ATOM    196  CD  LYS X 229      40.428  28.226  36.778  0.00  0.00            
ATOM    197  HD1 LYS X 229      39.836  27.305  36.962  0.00  0.00            
ATOM    198  HD2 LYS X 229      41.481  27.946  36.995  0.00  0.00            
ATOM    199  CE  LYS X 229      40.194  28.651  35.282  0.00  0.00            
ATOM    200  HE1 LYS X 229      40.598  27.786  34.714  0.00  0.00            
ATOM    201  HE2 LYS X 229      40.746  29.549  34.931  0.00  0.00            
ATOM    202  NZ  LYS X 229      38.744  28.721  34.993  0.00  0.00            
ATOM    203  HZ1 LYS X 229      38.599  29.105  34.037  0.00  0.00            
ATOM    204  HZ2 LYS X 229      38.290  29.458  35.570  0.00  0.00            
ATOM    205  HZ3 LYS X 229      38.288  27.790  35.065  0.00  0.00            
ATOM    206  C   LYS X 229      40.615  33.157  38.533  0.00  0.00            
ATOM    207  O   LYS X 229      41.388  33.684  39.299  0.00  0.00            
ATOM    208  N   SER X 230      40.052  33.918  37.561  0.00  0.00            
ATOM    209  HN  SER X 230      39.397  33.491  36.942  0.00  0.00            
ATOM    210  CA  SER X 230      40.267  35.327  37.375  0.00  0.00            
ATOM    211  HA  SER X 230      41.316  35.433  37.141  0.00  0.00            
ATOM    212  CB  SER X 230      39.528  35.771  36.071  0.00  0.00            
ATOM    213  HB1 SER X 230      39.614  36.863  35.884  0.00  0.00            
ATOM    214  HB2 SER X 230      38.469  35.452  36.168  0.00  0.00            
ATOM    215  OG  SER X 230      40.020  35.065  34.935  0.00  0.00            
ATOM    216  HG1 SER X 230      40.978  35.088  35.001  0.00  0.00            
ATOM    217  C   SER X 230      39.760  36.084  38.572  0.00  0.00            
ATOM    218  O   SER X 230      40.433  36.994  39.076  0.00  0.00            
ATOM    219  N   SER X 231      38.566  35.677  39.095  0.00  0.00            
ATOM    220  HN  SER X 231      37.961  35.037  38.627  0.00  0.00            
ATOM    221  CA  SER X 231      38.012  36.371  40.221  0.00  0.00            
ATOM    222  HA  SER X 231      37.987  37.417  39.954  0.00  0.00            
ATOM    223  CB  SER X 231      36.556  35.910  40.617  0.00  0.00            
ATOM    224  HB1 SER X 231      36.298  36.697  41.357  0.00  0.00            
ATOM    225  HB2 SER X 231      36.518  34.959  41.190  0.00  0.00            
ATOM    226  OG  SER X 231      35.603  36.037  39.558  0.00  0.00            
ATOM    227  HG1 SER X 231      36.054  35.672  38.793  0.00  0.00            
ATOM    228  C   SER X 231      38.946  36.398  41.476  0.00  0.00            
ATOM    229  O   SER X 231      39.072  37.315  42.288  0.00  0.00            
ATOM    230  N   LEU X 232      39.644  35.250  41.642  0.00  0.00            
ATOM    231  HN  LEU X 232      39.591  34.550  40.933  0.00  0.00            
ATOM    232  CA  LEU X 232      40.640  35.034  42.692  0.00  0.00            
ATOM    233  HA  LEU X 232      40.072  35.353  43.553  0.00  0.00            
ATOM    234  CB  LEU X 232      41.032  33.562  42.915  0.00  0.00            
ATOM    235  HB1 LEU X 232      41.555  33.197  42.006  0.00  0.00            
ATOM    236  HB2 LEU X 232      40.148  32.893  42.981  0.00  0.00            
ATOM    237  CG  LEU X 232      42.058  33.330  44.010  0.00  0.00            
ATOM    238  HG  LEU X 232      42.915  34.031  43.916  0.00  0.00            
ATOM    239  CD1 LEU X 232      41.405  33.411  45.404  0.00  0.00            
ATOM    240 HD11 LEU X 232      42.148  33.269  46.217  0.00  0.00            
ATOM    241 HD12 LEU X 232      40.621  32.643  45.578  0.00  0.00            
ATOM    242 HD13 LEU X 232      40.960  34.422  45.524  0.00  0.00            
ATOM    243  CD2 LEU X 232      42.807  31.997  43.964  0.00  0.00            
ATOM    244 HD21 LEU X 232      43.884  32.153  44.189  0.00  0.00            
ATOM    245 HD22 LEU X 232      42.417  31.118  44.521  0.00  0.00            
ATOM    246 HD23 LEU X 232      42.873  31.761  42.881  0.00  0.00            
ATOM    247  C   LEU X 232      41.886  35.975  42.401  0.00  0.00            
ATOM    248  O   LEU X 232      42.495  36.494  43.329  0.00  0.00            
ATOM    249  N   LEU X 233      42.272  36.196  41.092  0.00  0.00            
ATOM    250  HN  LEU X 233      41.761  35.822  40.321  0.00  0.00            
ATOM    251  CA  LEU X 233      43.343  37.109  40.687  0.00  0.00            
ATOM    252  HA  LEU X 233      44.264  36.742  41.116  0.00  0.00            
ATOM    253  CB  LEU X 233      43.503  37.158  39.119  0.00  0.00            
ATOM    254  HB1 LEU X 233      42.739  37.829  38.672  0.00  0.00            
ATOM    255  HB2 LEU X 233      43.178  36.200  38.659  0.00  0.00            
ATOM    256  CG  LEU X 233      44.973  37.530  38.706  0.00  0.00            
ATOM    257  HG  LEU X 233      45.223  38.552  39.064  0.00  0.00            
ATOM    258  CD1 LEU X 233      46.097  36.568  39.175  0.00  0.00            
ATOM    259 HD11 LEU X 233      46.419  36.670  40.234  0.00  0.00            
ATOM    260 HD12 LEU X 233      47.013  36.674  38.556  0.00  0.00            
ATOM    261 HD13 LEU X 233      45.752  35.516  39.072  0.00  0.00            
ATOM    262  CD2 LEU X 233      45.052  37.605  37.166  0.00  0.00            
ATOM    263 HD21 LEU X 233      46.073  37.469  36.749  0.00  0.00            
ATOM    264 HD22 LEU X 233      44.466  36.746  36.774  0.00  0.00            
ATOM    265 HD23 LEU X 233      44.511  38.398  36.607  0.00  0.00            
ATOM    266  C   LEU X 233      43.218  38.512  41.150  0.00  0.00            
ATOM    267  O   LEU X 233      44.095  39.088  41.723  0.00  0.00            
ATOM    268  N   ASN X 234      41.980  39.002  40.939  0.00  0.00            
ATOM    269  HN  ASN X 234      41.415  38.545  40.257  0.00  0.00            
ATOM    270  CA  ASN X 234      41.573  40.372  41.411  0.00  0.00            
ATOM    271  HA  ASN X 234      42.379  41.065  41.220  0.00  0.00            
ATOM    272  CB  ASN X 234      40.199  40.805  40.729  0.00  0.00            
ATOM    273  HB1 ASN X 234      39.910  41.821  41.074  0.00  0.00            
ATOM    274  HB2 ASN X 234      39.549  39.989  41.108  0.00  0.00            
ATOM    275  CG  ASN X 234      40.374  40.868  39.179  0.00  0.00            
ATOM    276  OD1 ASN X 234      41.385  40.665  38.547  0.00  0.00            
ATOM    277  ND2 ASN X 234      39.248  41.184  38.594  0.00  0.00            
ATOM    278 HD21 ASN X 234      38.435  41.265  39.170  0.00  0.00            
ATOM    279 HD22 ASN X 234      39.146  41.025  37.612  0.00  0.00            
ATOM    280  C   ASN X 234      41.561  40.540  42.868  0.00  0.00            
ATOM    281  O   ASN X 234      42.104  41.569  43.381  0.00  0.00            
ATOM    282  N   ALA X 235      40.985  39.536  43.629  0.00  0.00            
ATOM    283  HN  ALA X 235      40.669  38.726  43.142  0.00  0.00            
ATOM    284  CA  ALA X 235      40.858  39.554  45.084  0.00  0.00            
ATOM    285  HA  ALA X 235      40.134  40.293  45.393  0.00  0.00            
ATOM    286  CB  ALA X 235      40.323  38.222  45.696  0.00  0.00            
ATOM    287  HB1 ALA X 235      41.060  37.524  45.244  0.00  0.00            
ATOM    288  HB2 ALA X 235      39.388  37.995  45.140  0.00  0.00            
ATOM    289  HB3 ALA X 235      40.126  38.272  46.788  0.00  0.00            
ATOM    290  C   ALA X 235      42.281  39.811  45.643  0.00  0.00            
ATOM    291  O   ALA X 235      42.532  40.796  46.364  0.00  0.00            
ATOM    292  N   LEU X 236      43.224  38.939  45.198  0.00  0.00            
ATOM    293  HN  LEU X 236      42.811  38.172  44.714  0.00  0.00            
ATOM    294  CA  LEU X 236      44.630  38.925  45.493  0.00  0.00            
ATOM    295  HA  LEU X 236      44.607  38.882  46.572  0.00  0.00            
ATOM    296  CB  LEU X 236      45.290  37.568  45.048  0.00  0.00            
ATOM    297  HB1 LEU X 236      46.379  37.640  45.258  0.00  0.00            
ATOM    298  HB2 LEU X 236      45.022  37.322  43.999  0.00  0.00            
ATOM    299  CG  LEU X 236      44.717  36.238  45.770  0.00  0.00            
ATOM    300  HG  LEU X 236      43.630  36.165  45.552  0.00  0.00            
ATOM    301  CD1 LEU X 236      45.320  35.071  45.142  0.00  0.00            
ATOM    302 HD11 LEU X 236      46.413  35.050  45.341  0.00  0.00            
ATOM    303 HD12 LEU X 236      45.242  35.134  44.035  0.00  0.00            
ATOM    304 HD13 LEU X 236      44.882  34.111  45.489  0.00  0.00            
ATOM    305  CD2 LEU X 236      45.020  36.361  47.233  0.00  0.00            
ATOM    306 HD21 LEU X 236      44.611  37.301  47.661  0.00  0.00            
ATOM    307 HD22 LEU X 236      44.480  35.557  47.777  0.00  0.00            
ATOM    308 HD23 LEU X 236      46.072  36.464  47.576  0.00  0.00            
ATOM    309  C   LEU X 236      45.444  40.167  44.996  0.00  0.00            
ATOM    310  O   LEU X 236      46.108  40.833  45.770  0.00  0.00            
ATOM    311  N   ALA X 237      45.201  40.654  43.759  0.00  0.00            
ATOM    312  HN  ALA X 237      44.503  40.269  43.159  0.00  0.00            
ATOM    313  CA  ALA X 237      45.894  41.820  43.260  0.00  0.00            
ATOM    314  HA  ALA X 237      46.922  41.714  43.573  0.00  0.00            
ATOM    315  CB  ALA X 237      45.869  41.799  41.732  0.00  0.00            
ATOM    316  HB1 ALA X 237      46.059  40.780  41.330  0.00  0.00            
ATOM    317  HB2 ALA X 237      46.653  42.485  41.347  0.00  0.00            
ATOM    318  HB3 ALA X 237      44.836  42.115  41.474  0.00  0.00            
ATOM    319  C   ALA X 237      45.500  43.153  43.888  0.00  0.00            
ATOM    320  O   ALA X 237      46.371  44.026  44.044  0.00  0.00            
ATOM    321  N   GLY X 238      44.186  43.263  44.221  0.00  0.00            
ATOM    322  HN  GLY X 238      43.623  42.483  43.961  0.00  0.00            
ATOM    323  CA  GLY X 238      43.574  44.487  44.811  0.00  0.00            
ATOM    324  HA1 GLY X 238      44.330  45.195  45.116  0.00  0.00            
ATOM    325  HA2 GLY X 238      42.790  44.307  45.532  0.00  0.00            
ATOM    326  C   GLY X 238      42.964  45.327  43.725  0.00  0.00            
ATOM    327  O   GLY X 238      42.543  46.484  43.921  0.00  0.00            
ATOM    328  N   ARG X 239      42.864  44.788  42.548  0.00  0.00            
ATOM    329  HN  ARG X 239      43.192  43.884  42.287  0.00  0.00            
ATOM    330  CA  ARG X 239      42.701  45.659  41.416  0.00  0.00            
ATOM    331  HA  ARG X 239      41.993  46.427  41.693  0.00  0.00            
ATOM    332  CB  ARG X 239      44.065  46.163  40.893  0.00  0.00            
ATOM    333  HB1 ARG X 239      44.655  46.761  41.620  0.00  0.00            
ATOM    334  HB2 ARG X 239      43.763  46.856  40.079  0.00  0.00            
ATOM    335  CG  ARG X 239      45.013  45.108  40.335  0.00  0.00            
ATOM    336  HG1 ARG X 239      44.548  44.330  39.692  0.00  0.00            
ATOM    337  HG2 ARG X 239      45.474  44.579  41.196  0.00  0.00            
ATOM    338  CD  ARG X 239      46.267  45.587  39.557  0.00  0.00            
ATOM    339  HD1 ARG X 239      47.011  44.835  39.217  0.00  0.00            
ATOM    340  HD2 ARG X 239      46.862  46.262  40.209  0.00  0.00            
ATOM    341  NE  ARG X 239      45.822  46.358  38.389  0.00  0.00            
ATOM    342  HE  ARG X 239      45.162  47.109  38.405  0.00  0.00            
ATOM    343  CZ  ARG X 239      46.144  46.016  37.140  0.00  0.00            
ATOM    344  NH1 ARG X 239      47.053  45.118  36.727  0.00  0.00            
ATOM    345 HH11 ARG X 239      47.456  44.400  37.294  0.00  0.00            
ATOM    346 HH12 ARG X 239      47.016  44.977  35.738  0.00  0.00            
ATOM    347  NH2 ARG X 239      45.572  46.681  36.135  0.00  0.00            
ATOM    348 HH21 ARG X 239      44.755  47.206  36.374  0.00  0.00            
ATOM    349 HH22 ARG X 239      45.718  46.417  35.182  0.00  0.00            
ATOM    350  C   ARG X 239      42.139  44.761  40.395  0.00  0.00            
ATOM    351  O   ARG X 239      42.332  43.494  40.437  0.00  0.00            
ATOM    352  N   GLU X 240      41.397  45.343  39.421  0.00  0.00            
ATOM    353  HN  GLU X 240      41.337  46.335  39.346  0.00  0.00            
ATOM    354  CA  GLU X 240      40.777  44.571  38.266  0.00  0.00            
ATOM    355  HA  GLU X 240      40.372  43.657  38.674  0.00  0.00            
ATOM    356  CB  GLU X 240      39.676  45.357  37.531  0.00  0.00            
ATOM    357  HB1 GLU X 240      39.311  44.702  36.711  0.00  0.00            
ATOM    358  HB2 GLU X 240      40.046  46.290  37.055  0.00  0.00            
ATOM    359  CG  GLU X 240      38.416  45.755  38.406  0.00  0.00            
ATOM    360  HG1 GLU X 240      37.760  46.401  37.784  0.00  0.00            
ATOM    361  HG2 GLU X 240      38.722  46.445  39.222  0.00  0.00            
ATOM    362  CD  GLU X 240      37.515  44.690  38.971  0.00  0.00            
ATOM    363  OE1 GLU X 240      37.512  44.567  40.228  0.00  0.00            
ATOM    364  OE2 GLU X 240      36.899  43.950  38.143  0.00  0.00            
ATOM    365  C   GLU X 240      41.941  44.227  37.246  0.00  0.00            
ATOM    366  O   GLU X 240      42.183  44.967  36.279  0.00  0.00            
ATOM    367  N   ALA X 241      42.713  43.095  37.415  0.00  0.00            
ATOM    368  HN  ALA X 241      42.590  42.525  38.224  0.00  0.00            
ATOM    369  CA  ALA X 241      43.797  42.778  36.478  0.00  0.00            
ATOM    370  HA  ALA X 241      44.260  43.674  36.092  0.00  0.00            
ATOM    371  CB  ALA X 241      44.909  42.059  37.253  0.00  0.00            
ATOM    372  HB1 ALA X 241      45.863  41.824  36.735  0.00  0.00            
ATOM    373  HB2 ALA X 241      44.570  41.125  37.749  0.00  0.00            
ATOM    374  HB3 ALA X 241      45.231  42.736  38.072  0.00  0.00            
ATOM    375  C   ALA X 241      43.356  41.811  35.427  0.00  0.00            
ATOM    376  O   ALA X 241      43.983  41.800  34.372  0.00  0.00            
ATOM    377  N   ALA X 242      42.241  41.026  35.706  0.00  0.00            
ATOM    378  HN  ALA X 242      41.855  41.064  36.625  0.00  0.00            
ATOM    379  CA  ALA X 242      41.660  40.092  34.733  0.00  0.00            
ATOM    380  HA  ALA X 242      42.117  40.217  33.762  0.00  0.00            
ATOM    381  CB  ALA X 242      41.669  38.638  35.236  0.00  0.00            
ATOM    382  HB1 ALA X 242      41.142  38.544  36.210  0.00  0.00            
ATOM    383  HB2 ALA X 242      42.711  38.340  35.477  0.00  0.00            
ATOM    384  HB3 ALA X 242      41.209  37.926  34.518  0.00  0.00            
ATOM    385  C   ALA X 242      40.159  40.347  34.582  0.00  0.00            
ATOM    386  O   ALA X 242      39.451  40.773  35.480  0.00  0.00            
ATOM    387  N   ILE X 243      39.697  40.123  33.345  0.00  0.00            
ATOM    388  HN  ILE X 243      40.313  39.811  32.626  0.00  0.00            
ATOM    389  CA  ILE X 243      38.266  40.090  33.056  0.00  0.00            
ATOM    390  HA  ILE X 243      37.862  41.052  33.333  0.00  0.00            
ATOM    391  CB  ILE X 243      38.086  39.893  31.544  0.00  0.00            
ATOM    392  HB  ILE X 243      38.616  38.982  31.193  0.00  0.00            
ATOM    393  CG2 ILE X 243      36.644  39.693  31.058  0.00  0.00            
ATOM    394 HG21 ILE X 243      36.144  38.973  31.741  0.00  0.00            
ATOM    395 HG22 ILE X 243      36.670  39.316  30.014  0.00  0.00            
ATOM    396 HG23 ILE X 243      36.110  40.667  31.078  0.00  0.00            
ATOM    397  CG1 ILE X 243      38.771  41.103  30.838  0.00  0.00            
ATOM    398 HG11 ILE X 243      39.857  41.030  31.058  0.00  0.00            
ATOM    399 HG12 ILE X 243      38.476  42.122  31.166  0.00  0.00            
ATOM    400  CD  ILE X 243      38.628  41.089  29.230  0.00  0.00            
ATOM    401  HD1 ILE X 243      39.175  40.185  28.888  0.00  0.00            
ATOM    402  HD2 ILE X 243      39.174  41.936  28.763  0.00  0.00            
ATOM    403  HD3 ILE X 243      37.576  40.982  28.889  0.00  0.00            
ATOM    404  C   ILE X 243      37.576  38.986  33.810  0.00  0.00            
ATOM    405  O   ILE X 243      38.009  37.823  33.862  0.00  0.00            
ATOM    406  N   VAL X 244      36.343  39.349  34.326  0.00  0.00            
ATOM    407  HN  VAL X 244      35.951  40.257  34.197  0.00  0.00            
ATOM    408  CA  VAL X 244      35.344  38.434  34.917  0.00  0.00            
ATOM    409  HA  VAL X 244      35.761  37.439  34.864  0.00  0.00            
ATOM    410  CB  VAL X 244      35.075  38.699  36.412  0.00  0.00            
ATOM    411  HB  VAL X 244      34.598  39.676  36.639  0.00  0.00            
ATOM    412  CG1 VAL X 244      34.146  37.627  36.879  0.00  0.00            
ATOM    413 HG11 VAL X 244      34.158  37.363  37.958  0.00  0.00            
ATOM    414 HG12 VAL X 244      33.074  37.762  36.618  0.00  0.00            
ATOM    415 HG13 VAL X 244      34.457  36.676  36.396  0.00  0.00            
ATOM    416  CG2 VAL X 244      36.429  38.578  37.137  0.00  0.00            
ATOM    417 HG21 VAL X 244      36.890  39.589  37.110  0.00  0.00            
ATOM    418 HG22 VAL X 244      37.098  37.829  36.662  0.00  0.00            
ATOM    419 HG23 VAL X 244      36.268  38.230  38.180  0.00  0.00            
ATOM    420  C   VAL X 244      33.998  38.384  34.199  0.00  0.00            
ATOM    421  O   VAL X 244      33.424  39.437  33.862  0.00  0.00            
ATOM    422  N   THR X 245      33.509  37.205  33.905  0.00  0.00            
ATOM    423  HN  THR X 245      34.040  36.402  34.160  0.00  0.00            
ATOM    424  CA  THR X 245      32.266  37.028  33.123  0.00  0.00            
ATOM    425  HA  THR X 245      31.603  37.821  33.437  0.00  0.00            
ATOM    426  CB  THR X 245      32.529  36.870  31.646  0.00  0.00            
ATOM    427  HB  THR X 245      31.566  36.998  31.105  0.00  0.00            
ATOM    428  OG1 THR X 245      33.159  35.697  31.151  0.00  0.00            
ATOM    429  HG1 THR X 245      33.722  35.371  31.857  0.00  0.00            
ATOM    430  CG2 THR X 245      33.400  37.972  31.012  0.00  0.00            
ATOM    431 HG21 THR X 245      33.147  38.902  31.563  0.00  0.00            
ATOM    432 HG22 THR X 245      32.983  37.952  29.982  0.00  0.00            
ATOM    433 HG23 THR X 245      34.506  37.869  31.059  0.00  0.00            
ATOM    434  C   THR X 245      31.612  35.650  33.457  0.00  0.00            
ATOM    435  O   THR X 245      32.150  34.769  34.160  0.00  0.00            
ATOM    436  N   ASP X 246      30.387  35.476  32.917  0.00  0.00            
ATOM    437  HN  ASP X 246      29.882  36.189  32.437  0.00  0.00            
ATOM    438  CA  ASP X 246      29.589  34.329  32.975  0.00  0.00            
ATOM    439  HA  ASP X 246      29.898  33.675  33.777  0.00  0.00            
ATOM    440  CB  ASP X 246      28.239  34.902  33.344  0.00  0.00            
ATOM    441  HB1 ASP X 246      28.246  35.630  34.184  0.00  0.00            
ATOM    442  HB2 ASP X 246      27.555  34.058  33.575  0.00  0.00            
ATOM    443  CG  ASP X 246      27.693  35.715  32.216  0.00  0.00            
ATOM    444  OD1 ASP X 246      26.703  35.402  31.433  0.00  0.00            
ATOM    445  OD2 ASP X 246      28.321  36.842  32.011  0.00  0.00            
ATOM    446  C   ASP X 246      29.580  33.462  31.714  0.00  0.00            
ATOM    447  O   ASP X 246      28.723  32.626  31.480  0.00  0.00            
ATOM    448  N   ILE X 247      30.591  33.732  30.826  0.00  0.00            
ATOM    449  HN  ILE X 247      31.276  34.385  31.140  0.00  0.00            
ATOM    450  CA  ILE X 247      30.677  33.035  29.550  0.00  0.00            
ATOM    451  HA  ILE X 247      29.847  32.358  29.411  0.00  0.00            
ATOM    452  CB  ILE X 247      30.812  34.071  28.401  0.00  0.00            
ATOM    453  HB  ILE X 247      31.733  34.665  28.583  0.00  0.00            
ATOM    454  CG2 ILE X 247      31.095  33.361  27.078  0.00  0.00            
ATOM    455 HG21 ILE X 247      32.017  32.743  27.123  0.00  0.00            
ATOM    456 HG22 ILE X 247      31.232  34.092  26.252  0.00  0.00            
ATOM    457 HG23 ILE X 247      30.253  32.680  26.832  0.00  0.00            
ATOM    458  CG1 ILE X 247      29.609  35.038  28.320  0.00  0.00            
ATOM    459 HG11 ILE X 247      29.288  35.602  29.221  0.00  0.00            
ATOM    460 HG12 ILE X 247      28.796  34.476  27.813  0.00  0.00            
ATOM    461  CD  ILE X 247      29.887  36.261  27.356  0.00  0.00            
ATOM    462  HD1 ILE X 247      29.959  35.893  26.310  0.00  0.00            
ATOM    463  HD2 ILE X 247      30.765  36.854  27.690  0.00  0.00            
ATOM    464  HD3 ILE X 247      29.045  36.985  27.392  0.00  0.00            
ATOM    465  C   ILE X 247      32.021  32.182  29.609  0.00  0.00            
ATOM    466  O   ILE X 247      33.115  32.617  29.765  0.00  0.00            
ATOM    467  N   ALA X 248      31.848  30.806  29.533  0.00  0.00            
ATOM    468  HN  ALA X 248      30.942  30.537  29.218  0.00  0.00            
ATOM    469  CA  ALA X 248      32.970  29.911  29.854  0.00  0.00            
ATOM    470  HA  ALA X 248      33.349  30.217  30.818  0.00  0.00            
ATOM    471  CB  ALA X 248      32.335  28.526  30.056  0.00  0.00            
ATOM    472  HB1 ALA X 248      31.535  28.559  30.826  0.00  0.00            
ATOM    473  HB2 ALA X 248      33.087  27.822  30.472  0.00  0.00            
ATOM    474  HB3 ALA X 248      31.878  28.173  29.107  0.00  0.00            
ATOM    475  C   ALA X 248      34.152  29.878  28.867  0.00  0.00            
ATOM    476  O   ALA X 248      33.927  29.830  27.646  0.00  0.00            
ATOM    477  N   GLY X 249      35.441  30.016  29.371  0.00  0.00            
ATOM    478  HN  GLY X 249      35.496  30.352  30.308  0.00  0.00            
ATOM    479  CA  GLY X 249      36.555  30.101  28.502  0.00  0.00            
ATOM    480  HA1 GLY X 249      36.335  29.655  27.543  0.00  0.00            
ATOM    481  HA2 GLY X 249      37.331  29.675  29.122  0.00  0.00            
ATOM    482  C   GLY X 249      37.026  31.453  28.125  0.00  0.00            
ATOM    483  O   GLY X 249      37.688  31.684  27.117  0.00  0.00            
ATOM    484  N   THR X 250      36.715  32.466  28.926  0.00  0.00            
ATOM    485  HN  THR X 250      36.209  32.199  29.743  0.00  0.00            
ATOM    486  CA  THR X 250      37.030  33.896  28.729  0.00  0.00            
ATOM    487  HA  THR X 250      36.614  34.262  27.802  0.00  0.00            
ATOM    488  CB  THR X 250      36.277  34.872  29.642  0.00  0.00            
ATOM    489  HB  THR X 250      36.168  34.467  30.671  0.00  0.00            
ATOM    490  OG1 THR X 250      34.950  35.027  29.242  0.00  0.00            
ATOM    491  HG1 THR X 250      34.338  34.855  29.961  0.00  0.00            
ATOM    492  CG2 THR X 250      37.034  36.226  29.663  0.00  0.00            
ATOM    493 HG21 THR X 250      36.528  36.971  30.314  0.00  0.00            
ATOM    494 HG22 THR X 250      37.036  36.735  28.675  0.00  0.00            
ATOM    495 HG23 THR X 250      38.018  36.176  30.175  0.00  0.00            
ATOM    496  C   THR X 250      38.489  34.145  28.663  0.00  0.00            
ATOM    497  O   THR X 250      38.886  34.800  27.641  0.00  0.00            
ATOM    498  N   THR X 251      39.254  33.640  29.542  0.00  0.00            
ATOM    499  HN  THR X 251      38.756  33.166  30.264  0.00  0.00            
ATOM    500  CA  THR X 251      40.736  33.681  29.505  0.00  0.00            
ATOM    501  HA  THR X 251      41.030  34.707  29.339  0.00  0.00            
ATOM    502  CB  THR X 251      41.274  33.234  30.866  0.00  0.00            
ATOM    503  HB  THR X 251      41.113  32.174  31.157  0.00  0.00            
ATOM    504  OG1 THR X 251      40.650  34.056  31.868  0.00  0.00            
ATOM    505  HG1 THR X 251      40.931  34.891  31.487  0.00  0.00            
ATOM    506  CG2 THR X 251      42.827  33.616  31.035  0.00  0.00            
ATOM    507 HG21 THR X 251      43.035  33.182  32.036  0.00  0.00            
ATOM    508 HG22 THR X 251      43.134  34.679  31.145  0.00  0.00            
ATOM    509 HG23 THR X 251      43.434  32.967  30.370  0.00  0.00            
ATOM    510  C   THR X 251      41.414  32.780  28.450  0.00  0.00            
ATOM    511  O   THR X 251      41.306  31.506  28.566  0.00  0.00            
ATOM    512  N   ARG X 252      42.106  33.383  27.478  0.00  0.00            
ATOM    513  HN  ARG X 252      42.069  34.379  27.459  0.00  0.00            
ATOM    514  CA  ARG X 252      42.895  32.582  26.539  0.00  0.00            
ATOM    515  HA  ARG X 252      42.851  31.568  26.908  0.00  0.00            
ATOM    516  CB  ARG X 252      42.492  32.616  25.102  0.00  0.00            
ATOM    517  HB1 ARG X 252      43.199  31.984  24.524  0.00  0.00            
ATOM    518  HB2 ARG X 252      42.608  33.666  24.758  0.00  0.00            
ATOM    519  CG  ARG X 252      41.001  32.157  24.891  0.00  0.00            
ATOM    520  HG1 ARG X 252      40.650  31.667  25.824  0.00  0.00            
ATOM    521  HG2 ARG X 252      40.868  31.324  24.168  0.00  0.00            
ATOM    522  CD  ARG X 252      40.024  33.307  24.670  0.00  0.00            
ATOM    523  HD1 ARG X 252      40.231  34.130  25.387  0.00  0.00            
ATOM    524  HD2 ARG X 252      38.968  32.960  24.662  0.00  0.00            
ATOM    525  NE  ARG X 252      40.162  33.813  23.249  0.00  0.00            
ATOM    526  HE  ARG X 252      40.823  34.512  22.977  0.00  0.00            
ATOM    527  CZ  ARG X 252      39.427  33.342  22.190  0.00  0.00            
ATOM    528  NH1 ARG X 252      39.529  33.849  20.987  0.00  0.00            
ATOM    529 HH11 ARG X 252      40.155  34.624  20.899  0.00  0.00            
ATOM    530 HH12 ARG X 252      38.890  33.582  20.265  0.00  0.00            
ATOM    531  NH2 ARG X 252      38.659  32.300  22.273  0.00  0.00            
ATOM    532 HH21 ARG X 252      38.363  32.012  23.184  0.00  0.00            
ATOM    533 HH22 ARG X 252      38.296  31.863  21.449  0.00  0.00            
ATOM    534  C   ARG X 252      44.374  32.985  26.637  0.00  0.00            
ATOM    535  O   ARG X 252      45.186  32.599  25.823  0.00  0.00            
ATOM    536  N   ASP X 253      44.763  33.835  27.558  0.00  0.00            
ATOM    537  HN  ASP X 253      44.131  34.158  28.259  0.00  0.00            
ATOM    538  CA  ASP X 253      46.118  34.276  27.706  0.00  0.00            
ATOM    539  HA  ASP X 253      46.672  33.934  26.844  0.00  0.00            
ATOM    540  CB  ASP X 253      46.210  35.841  27.753  0.00  0.00            
ATOM    541  HB1 ASP X 253      47.269  36.171  27.815  0.00  0.00            
ATOM    542  HB2 ASP X 253      45.735  36.264  28.665  0.00  0.00            
ATOM    543  CG  ASP X 253      45.579  36.633  26.627  0.00  0.00            
ATOM    544  OD1 ASP X 253      44.599  37.433  26.925  0.00  0.00            
ATOM    545  OD2 ASP X 253      46.129  36.650  25.474  0.00  0.00            
ATOM    546  C   ASP X 253      46.545  33.776  29.048  0.00  0.00            
ATOM    547  O   ASP X 253      45.739  33.115  29.729  0.00  0.00            
ATOM    548  N   VAL X 254      47.830  34.046  29.495  0.00  0.00            
ATOM    549  HN  VAL X 254      48.421  34.677  28.999  0.00  0.00            
ATOM    550  CA  VAL X 254      48.267  33.751  30.849  0.00  0.00            
ATOM    551  HA  VAL X 254      47.513  33.175  31.366  0.00  0.00            
ATOM    552  CB  VAL X 254      49.664  33.086  30.935  0.00  0.00            
ATOM    553  HB  VAL X 254      50.443  33.687  30.418  0.00  0.00            
ATOM    554  CG1 VAL X 254      50.038  33.089  32.477  0.00  0.00            
ATOM    555 HG11 VAL X 254      51.028  32.610  32.636  0.00  0.00            
ATOM    556 HG12 VAL X 254      49.933  34.089  32.949  0.00  0.00            
ATOM    557 HG13 VAL X 254      49.342  32.439  33.048  0.00  0.00            
ATOM    558  CG2 VAL X 254      49.614  31.674  30.359  0.00  0.00            
ATOM    559 HG21 VAL X 254      50.515  31.100  30.664  0.00  0.00            
ATOM    560 HG22 VAL X 254      49.591  31.663  29.249  0.00  0.00            
ATOM    561 HG23 VAL X 254      48.724  31.103  30.700  0.00  0.00            
ATOM    562  C   VAL X 254      48.316  35.176  31.451  0.00  0.00            
ATOM    563  O   VAL X 254      48.921  36.073  30.841  0.00  0.00            
ATOM    564  N   LEU X 255      47.741  35.395  32.636  0.00  0.00            
ATOM    565  HN  LEU X 255      47.207  34.656  33.039  0.00  0.00            
ATOM    566  CA  LEU X 255      47.647  36.689  33.304  0.00  0.00            
ATOM    567  HA  LEU X 255      47.938  37.504  32.657  0.00  0.00            
ATOM    568  CB  LEU X 255      46.240  36.980  33.832  0.00  0.00            
ATOM    569  HB1 LEU X 255      46.241  37.929  34.410  0.00  0.00            
ATOM    570  HB2 LEU X 255      45.950  36.234  34.603  0.00  0.00            
ATOM    571  CG  LEU X 255      45.210  36.873  32.745  0.00  0.00            
ATOM    572  HG  LEU X 255      45.336  35.861  32.304  0.00  0.00            
ATOM    573  CD1 LEU X 255      43.832  37.113  33.355  0.00  0.00            
ATOM    574 HD11 LEU X 255      43.645  36.455  34.231  0.00  0.00            
ATOM    575 HD12 LEU X 255      42.976  36.962  32.661  0.00  0.00            
ATOM    576 HD13 LEU X 255      43.769  38.158  33.726  0.00  0.00            
ATOM    577  CD2 LEU X 255      45.322  37.892  31.550  0.00  0.00            
ATOM    578 HD21 LEU X 255      45.122  38.903  31.965  0.00  0.00            
ATOM    579 HD22 LEU X 255      46.350  37.868  31.130  0.00  0.00            
ATOM    580 HD23 LEU X 255      44.566  37.486  30.845  0.00  0.00            
ATOM    581  C   LEU X 255      48.544  36.497  34.534  0.00  0.00            
ATOM    582  O   LEU X 255      48.570  35.506  35.199  0.00  0.00            
ATOM    583  N   ARG X 256      49.344  37.533  34.924  0.00  0.00            
ATOM    584  HN  ARG X 256      49.343  38.383  34.404  0.00  0.00            
ATOM    585  CA  ARG X 256      50.387  37.435  35.935  0.00  0.00            
ATOM    586  HA  ARG X 256      50.264  36.491  36.444  0.00  0.00            
ATOM    587  CB  ARG X 256      51.805  37.357  35.246  0.00  0.00            
ATOM    588  HB1 ARG X 256      52.667  37.368  35.947  0.00  0.00            
ATOM    589  HB2 ARG X 256      51.971  38.317  34.711  0.00  0.00            
ATOM    590  CG  ARG X 256      51.969  36.196  34.278  0.00  0.00            
ATOM    591  HG1 ARG X 256      51.227  36.338  33.464  0.00  0.00            
ATOM    592  HG2 ARG X 256      51.756  35.371  34.992  0.00  0.00            
ATOM    593  CD  ARG X 256      53.308  36.113  33.572  0.00  0.00            
ATOM    594  HD1 ARG X 256      54.191  35.951  34.225  0.00  0.00            
ATOM    595  HD2 ARG X 256      53.382  37.052  32.982  0.00  0.00            
ATOM    596  NE  ARG X 256      53.301  34.988  32.508  0.00  0.00            
ATOM    597  HE  ARG X 256      53.021  35.196  31.571  0.00  0.00            
ATOM    598  CZ  ARG X 256      53.658  33.712  32.730  0.00  0.00            
ATOM    599  NH1 ARG X 256      53.957  33.167  33.872  0.00  0.00            
ATOM    600 HH11 ARG X 256      54.380  33.808  34.513  0.00  0.00            
ATOM    601 HH12 ARG X 256      54.111  32.182  33.796  0.00  0.00            
ATOM    602  NH2 ARG X 256      53.823  33.008  31.646  0.00  0.00            
ATOM    603 HH21 ARG X 256      53.591  33.411  30.760  0.00  0.00            
ATOM    604 HH22 ARG X 256      54.033  32.039  31.769  0.00  0.00            
ATOM    605  C   ARG X 256      50.333  38.608  36.836  0.00  0.00            
ATOM    606  O   ARG X 256      50.545  39.755  36.378  0.00  0.00            
ATOM    607  N   GLU X 257      50.166  38.427  38.166  0.00  0.00            
ATOM    608  HN  GLU X 257      50.008  37.546  38.605  0.00  0.00            
ATOM    609  CA  GLU X 257      50.219  39.442  39.140  0.00  0.00            
ATOM    610  HA  GLU X 257      50.674  40.338  38.744  0.00  0.00            
ATOM    611  CB  GLU X 257      48.864  39.720  39.685  0.00  0.00            
ATOM    612  HB1 GLU X 257      48.922  40.227  40.672  0.00  0.00            
ATOM    613  HB2 GLU X 257      48.336  38.757  39.852  0.00  0.00            
ATOM    614  CG  GLU X 257      48.021  40.706  38.672  0.00  0.00            
ATOM    615  HG1 GLU X 257      46.982  40.656  39.062  0.00  0.00            
ATOM    616  HG2 GLU X 257      48.081  40.220  37.675  0.00  0.00            
ATOM    617  CD  GLU X 257      48.418  42.169  38.700  0.00  0.00            
ATOM    618  OE1 GLU X 257      49.203  42.529  39.653  0.00  0.00            
ATOM    619  OE2 GLU X 257      48.013  42.984  37.858  0.00  0.00            
ATOM    620  C   GLU X 257      51.157  39.053  40.200  0.00  0.00            
ATOM    621  O   GLU X 257      51.460  37.875  40.321  0.00  0.00            
ATOM    622  N   HSD X 258      51.633  40.071  40.985  0.00  0.00            
ATOM    623  HN  HSD X 258      51.328  40.974  40.696  0.00  0.00            
ATOM    624  CA  HSD X 258      52.724  39.833  41.887  0.00  0.00            
ATOM    625  HA  HSD X 258      52.728  38.824  42.273  0.00  0.00            
ATOM    626  CB  HSD X 258      54.173  40.240  41.368  0.00  0.00            
ATOM    627  HB1 HSD X 258      54.416  41.309  41.190  0.00  0.00            
ATOM    628  HB2 HSD X 258      54.291  39.858  40.331  0.00  0.00            
ATOM    629  ND1 HSD X 258      55.649  40.373  43.385  0.00  0.00            
ATOM    630  HD1 HSD X 258      55.533  41.351  43.558  0.00  0.00            
ATOM    631  CG  HSD X 258      55.241  39.733  42.230  0.00  0.00            
ATOM    632  CE1 HSD X 258      56.611  39.566  43.884  0.00  0.00            
ATOM    633  HE1 HSD X 258      57.197  39.870  44.751  0.00  0.00            
ATOM    634  NE2 HSD X 258      56.808  38.438  43.182  0.00  0.00            
ATOM    635  CD2 HSD X 258      55.954  38.563  42.154  0.00  0.00            
ATOM    636  HD2 HSD X 258      56.024  37.941  41.270  0.00  0.00            
ATOM    637  C   HSD X 258      52.306  40.636  43.119  0.00  0.00            
ATOM    638  O   HSD X 258      51.914  41.838  42.972  0.00  0.00            
ATOM    639  N   ILE X 259      52.418  40.011  44.266  0.00  0.00            
ATOM    640  HN  ILE X 259      52.750  39.071  44.278  0.00  0.00            
ATOM    641  CA  ILE X 259      52.013  40.551  45.630  0.00  0.00            
ATOM    642  HA  ILE X 259      52.046  41.629  45.574  0.00  0.00            
ATOM    643  CB  ILE X 259      50.624  40.055  46.019  0.00  0.00            
ATOM    644  HB  ILE X 259      50.351  40.425  47.031  0.00  0.00            
ATOM    645  CG2 ILE X 259      49.606  40.769  45.067  0.00  0.00            
ATOM    646 HG21 ILE X 259      49.558  41.876  44.989  0.00  0.00            
ATOM    647 HG22 ILE X 259      48.635  40.281  45.299  0.00  0.00            
ATOM    648 HG23 ILE X 259      49.815  40.412  44.036  0.00  0.00            
ATOM    649  CG1 ILE X 259      50.398  38.568  45.884  0.00  0.00            
ATOM    650 HG11 ILE X 259      51.376  38.063  46.036  0.00  0.00            
ATOM    651 HG12 ILE X 259      50.108  38.231  44.865  0.00  0.00            
ATOM    652  CD  ILE X 259      49.388  38.045  46.913  0.00  0.00            
ATOM    653  HD1 ILE X 259      48.554  38.779  46.925  0.00  0.00            
ATOM    654  HD2 ILE X 259      49.791  38.017  47.948  0.00  0.00            
ATOM    655  HD3 ILE X 259      48.966  37.043  46.683  0.00  0.00            
ATOM    656  C   ILE X 259      52.934  40.083  46.696  0.00  0.00            
ATOM    657  O   ILE X 259      53.827  39.223  46.438  0.00  0.00            
ATOM    658  N   HSD X 260      52.883  40.711  47.869  0.00  0.00            
ATOM    659  HN  HSD X 260      52.073  41.283  47.975  0.00  0.00            
ATOM    660  CA  HSD X 260      53.781  40.384  49.007  0.00  0.00            
ATOM    661  HA  HSD X 260      54.416  39.545  48.763  0.00  0.00            
ATOM    662  CB  HSD X 260      54.507  41.615  49.302  0.00  0.00            
ATOM    663  HB1 HSD X 260      54.995  41.803  50.282  0.00  0.00            
ATOM    664  HB2 HSD X 260      53.804  42.471  49.210  0.00  0.00            
ATOM    665  ND1 HSD X 260      56.914  42.110  48.787  0.00  0.00            
ATOM    666  HD1 HSD X 260      57.240  42.506  49.646  0.00  0.00            
ATOM    667  CG  HSD X 260      55.632  41.813  48.353  0.00  0.00            
ATOM    668  CE1 HSD X 260      57.656  42.294  47.648  0.00  0.00            
ATOM    669  HE1 HSD X 260      58.654  42.732  47.651  0.00  0.00            
ATOM    670  NE2 HSD X 260      56.927  42.129  46.554  0.00  0.00            
ATOM    671  CD2 HSD X 260      55.640  41.816  46.959  0.00  0.00            
ATOM    672  HD2 HSD X 260      54.896  41.688  46.182  0.00  0.00            
ATOM    673  C   HSD X 260      52.747  39.990  50.107  0.00  0.00            
ATOM    674  O   HSD X 260      51.783  40.686  50.295  0.00  0.00            
ATOM    675  N   ILE X 261      53.006  38.852  50.789  0.00  0.00            
ATOM    676  HN  ILE X 261      53.784  38.253  50.619  0.00  0.00            
ATOM    677  CA  ILE X 261      52.223  38.432  51.948  0.00  0.00            
ATOM    678  HA  ILE X 261      51.456  39.159  52.169  0.00  0.00            
ATOM    679  CB  ILE X 261      51.679  37.021  51.696  0.00  0.00            
ATOM    680  HB  ILE X 261      52.457  36.357  51.263  0.00  0.00            
ATOM    681  CG2 ILE X 261      51.168  36.482  53.079  0.00  0.00            
ATOM    682 HG21 ILE X 261      52.001  36.258  53.779  0.00  0.00            
ATOM    683 HG22 ILE X 261      50.563  35.603  52.769  0.00  0.00            
ATOM    684 HG23 ILE X 261      50.493  37.132  53.675  0.00  0.00            
ATOM    685  CG1 ILE X 261      50.596  37.201  50.630  0.00  0.00            
ATOM    686 HG11 ILE X 261      51.071  37.489  49.668  0.00  0.00            
ATOM    687 HG12 ILE X 261      49.882  37.976  50.984  0.00  0.00            
ATOM    688  CD  ILE X 261      49.763  35.895  50.347  0.00  0.00            
ATOM    689  HD1 ILE X 261      48.921  36.048  49.639  0.00  0.00            
ATOM    690  HD2 ILE X 261      49.345  35.489  51.293  0.00  0.00            
ATOM    691  HD3 ILE X 261      50.448  35.104  49.974  0.00  0.00            
ATOM    692  C   ILE X 261      53.201  38.456  53.119  0.00  0.00            
ATOM    693  O   ILE X 261      54.124  37.639  53.105  0.00  0.00            
ATOM    694  N   ASP X 262      53.017  39.419  54.006  0.00  0.00            
ATOM    695  HN  ASP X 262      52.272  40.060  53.834  0.00  0.00            
ATOM    696  CA  ASP X 262      53.792  39.512  55.260  0.00  0.00            
ATOM    697  HA  ASP X 262      53.694  40.531  55.605  0.00  0.00            
ATOM    698  CB  ASP X 262      53.259  38.553  56.363  0.00  0.00            
ATOM    699  HB1 ASP X 262      53.891  38.686  57.268  0.00  0.00            
ATOM    700  HB2 ASP X 262      53.313  37.537  55.917  0.00  0.00            
ATOM    701  CG  ASP X 262      51.825  38.850  56.702  0.00  0.00            
ATOM    702  OD1 ASP X 262      51.092  37.878  57.043  0.00  0.00            
ATOM    703  OD2 ASP X 262      51.400  40.060  56.777  0.00  0.00            
ATOM    704  C   ASP X 262      55.260  39.522  55.117  0.00  0.00            
ATOM    705  O   ASP X 262      56.029  38.911  55.892  0.00  0.00            
ATOM    706  N   GLY X 263      55.723  40.288  54.117  0.00  0.00            
ATOM    707  HN  GLY X 263      55.064  40.867  53.644  0.00  0.00            
ATOM    708  CA  GLY X 263      57.102  40.307  53.666  0.00  0.00            
ATOM    709  HA1 GLY X 263      57.775  40.324  54.510  0.00  0.00            
ATOM    710  HA2 GLY X 263      57.190  41.280  53.208  0.00  0.00            
ATOM    711  C   GLY X 263      57.608  39.300  52.627  0.00  0.00            
ATOM    712  O   GLY X 263      58.777  39.287  52.163  0.00  0.00            
ATOM    713  N   MET X 264      56.749  38.364  52.187  0.00  0.00            
ATOM    714  HN  MET X 264      55.809  38.354  52.518  0.00  0.00            
ATOM    715  CA  MET X 264      57.205  37.200  51.416  0.00  0.00            
ATOM    716  HA  MET X 264      58.284  37.199  51.355  0.00  0.00            
ATOM    717  CB  MET X 264      56.886  35.844  52.036  0.00  0.00            
ATOM    718  HB1 MET X 264      55.787  35.751  52.172  0.00  0.00            
ATOM    719  HB2 MET X 264      57.322  35.831  53.058  0.00  0.00            
ATOM    720  CG  MET X 264      57.414  34.640  51.252  0.00  0.00            
ATOM    721  HG1 MET X 264      58.436  34.782  50.839  0.00  0.00            
ATOM    722  HG2 MET X 264      56.776  34.607  50.343  0.00  0.00            
ATOM    723  SD  MET X 264      57.074  33.124  52.150  0.00  0.00            
ATOM    724  CE  MET X 264      55.352  32.901  51.715  0.00  0.00            
ATOM    725  HE1 MET X 264      54.794  33.677  52.280  0.00  0.00            
ATOM    726  HE2 MET X 264      55.167  32.923  50.619  0.00  0.00            
ATOM    727  HE3 MET X 264      54.964  31.899  52.000  0.00  0.00            
ATOM    728  C   MET X 264      56.615  37.447  50.036  0.00  0.00            
ATOM    729  O   MET X 264      55.392  37.385  49.923  0.00  0.00            
ATOM    730  N   PRO X 265      57.369  37.778  48.975  0.00  0.00            
ATOM    731  CD  PRO X 265      58.876  38.011  49.031  0.00  0.00            
ATOM    732  HD1 PRO X 265      59.034  39.041  49.416  0.00  0.00            
ATOM    733  HD2 PRO X 265      59.507  37.263  49.557  0.00  0.00            
ATOM    734  CA  PRO X 265      56.867  38.002  47.619  0.00  0.00            
ATOM    735  HA  PRO X 265      56.071  38.720  47.750  0.00  0.00            
ATOM    736  CB  PRO X 265      58.086  38.571  46.887  0.00  0.00            
ATOM    737  HB1 PRO X 265      58.064  39.664  47.087  0.00  0.00            
ATOM    738  HB2 PRO X 265      57.979  38.459  45.787  0.00  0.00            
ATOM    739  CG  PRO X 265      59.254  38.052  47.605  0.00  0.00            
ATOM    740  HG1 PRO X 265      60.221  38.575  47.442  0.00  0.00            
ATOM    741  HG2 PRO X 265      59.343  36.973  47.357  0.00  0.00            
ATOM    742  C   PRO X 265      56.361  36.674  46.989  0.00  0.00            
ATOM    743  O   PRO X 265      56.993  35.665  47.139  0.00  0.00            
ATOM    744  N   LEU X 266      55.233  36.654  46.238  0.00  0.00            
ATOM    745  HN  LEU X 266      54.748  37.511  46.085  0.00  0.00            
ATOM    746  CA  LEU X 266      54.630  35.542  45.540  0.00  0.00            
ATOM    747  HA  LEU X 266      55.464  34.860  45.455  0.00  0.00            
ATOM    748  CB  LEU X 266      53.447  34.990  46.352  0.00  0.00            
ATOM    749  HB1 LEU X 266      52.824  34.215  45.855  0.00  0.00            
ATOM    750  HB2 LEU X 266      52.766  35.826  46.621  0.00  0.00            
ATOM    751  CG  LEU X 266      53.953  34.260  47.711  0.00  0.00            
ATOM    752  HG  LEU X 266      54.514  34.998  48.323  0.00  0.00            
ATOM    753  CD1 LEU X 266      52.688  33.902  48.573  0.00  0.00            
ATOM    754 HD11 LEU X 266      52.980  33.628  49.609  0.00  0.00            
ATOM    755 HD12 LEU X 266      52.017  33.156  48.095  0.00  0.00            
ATOM    756 HD13 LEU X 266      51.986  34.761  48.630  0.00  0.00            
ATOM    757  CD2 LEU X 266      54.747  32.985  47.502  0.00  0.00            
ATOM    758 HD21 LEU X 266      54.718  32.532  46.488  0.00  0.00            
ATOM    759 HD22 LEU X 266      55.812  33.072  47.807  0.00  0.00            
ATOM    760 HD23 LEU X 266      54.245  32.267  48.185  0.00  0.00            
ATOM    761  C   LEU X 266      54.023  35.896  44.203  0.00  0.00            
ATOM    762  O   LEU X 266      53.361  36.879  44.083  0.00  0.00            
ATOM    763  N   HSD X 267      54.203  35.035  43.138  0.00  0.00            
ATOM    764  HN  HSD X 267      54.726  34.187  43.180  0.00  0.00            
ATOM    765  CA  HSD X 267      53.777  35.331  41.799  0.00  0.00            
ATOM    766  HA  HSD X 267      53.361  36.328  41.772  0.00  0.00            
ATOM    767  CB  HSD X 267      54.914  35.020  40.828  0.00  0.00            
ATOM    768  HB1 HSD X 267      54.935  33.913  40.734  0.00  0.00            
ATOM    769  HB2 HSD X 267      55.904  35.365  41.194  0.00  0.00            
ATOM    770  ND1 HSD X 267      53.589  36.388  39.136  0.00  0.00            
ATOM    771  HD1 HSD X 267      52.725  36.427  39.638  0.00  0.00            
ATOM    772  CG  HSD X 267      54.681  35.656  39.482  0.00  0.00            
ATOM    773  CE1 HSD X 267      53.896  37.149  38.006  0.00  0.00            
ATOM    774  HE1 HSD X 267      53.177  37.850  37.582  0.00  0.00            
ATOM    775  NE2 HSD X 267      55.150  36.913  37.680  0.00  0.00            
ATOM    776  CD2 HSD X 267      55.640  36.014  38.606  0.00  0.00            
ATOM    777  HD2 HSD X 267      56.694  35.769  38.648  0.00  0.00            
ATOM    778  C   HSD X 267      52.529  34.495  41.522  0.00  0.00            
ATOM    779  O   HSD X 267      52.635  33.257  41.427  0.00  0.00            
ATOM    780  N   ILE X 268      51.351  35.147  41.529  0.00  0.00            
ATOM    781  HN  ILE X 268      51.411  36.140  41.463  0.00  0.00            
ATOM    782  CA  ILE X 268      50.010  34.616  41.473  0.00  0.00            
ATOM    783  HA  ILE X 268      50.029  33.570  41.739  0.00  0.00            
ATOM    784  CB  ILE X 268      48.916  35.309  42.316  0.00  0.00            
ATOM    785  HB  ILE X 268      48.831  36.331  41.888  0.00  0.00            
ATOM    786  CG2 ILE X 268      47.608  34.574  42.117  0.00  0.00            
ATOM    787 HG21 ILE X 268      47.233  34.544  41.071  0.00  0.00            
ATOM    788 HG22 ILE X 268      46.817  35.040  42.742  0.00  0.00            
ATOM    789 HG23 ILE X 268      47.698  33.601  42.646  0.00  0.00            
ATOM    790  CG1 ILE X 268      49.280  35.453  43.854  0.00  0.00            
ATOM    791 HG11 ILE X 268      48.457  35.943  44.416  0.00  0.00            
ATOM    792 HG12 ILE X 268      50.053  36.251  43.853  0.00  0.00            
ATOM    793  CD  ILE X 268      49.624  34.241  44.667  0.00  0.00            
ATOM    794  HD1 ILE X 268      48.897  33.415  44.517  0.00  0.00            
ATOM    795  HD2 ILE X 268      49.718  34.518  45.739  0.00  0.00            
ATOM    796  HD3 ILE X 268      50.613  33.826  44.375  0.00  0.00            
ATOM    797  C   ILE X 268      49.618  34.669  39.979  0.00  0.00            
ATOM    798  O   ILE X 268      49.621  35.706  39.348  0.00  0.00            
ATOM    799  N   ILE X 269      49.266  33.469  39.410  0.00  0.00            
ATOM    800  HN  ILE X 269      49.419  32.638  39.938  0.00  0.00            
ATOM    801  CA  ILE X 269      49.099  33.306  37.949  0.00  0.00            
ATOM    802  HA  ILE X 269      49.199  34.265  37.463  0.00  0.00            
ATOM    803  CB  ILE X 269      50.285  32.485  37.311  0.00  0.00            
ATOM    804  HB  ILE X 269      50.063  31.435  37.598  0.00  0.00            
ATOM    805  CG2 ILE X 269      50.144  32.471  35.802  0.00  0.00            
ATOM    806 HG21 ILE X 269      50.824  31.713  35.357  0.00  0.00            
ATOM    807 HG22 ILE X 269      50.191  33.446  35.272  0.00  0.00            
ATOM    808 HG23 ILE X 269      49.226  31.968  35.429  0.00  0.00            
ATOM    809  CG1 ILE X 269      51.662  32.926  37.833  0.00  0.00            
ATOM    810 HG11 ILE X 269      51.749  32.665  38.909  0.00  0.00            
ATOM    811 HG12 ILE X 269      51.655  34.035  37.780  0.00  0.00            
ATOM    812  CD  ILE X 269      52.923  32.136  37.232  0.00  0.00            
ATOM    813  HD1 ILE X 269      53.235  32.573  36.259  0.00  0.00            
ATOM    814  HD2 ILE X 269      52.720  31.053  37.090  0.00  0.00            
ATOM    815  HD3 ILE X 269      53.759  32.260  37.953  0.00  0.00            
ATOM    816  C   ILE X 269      47.803  32.711  37.546  0.00  0.00            
ATOM    817  O   ILE X 269      47.424  31.608  37.966  0.00  0.00            
ATOM    818  N   ASP X 270      46.972  33.347  36.748  0.00  0.00            
ATOM    819  HN  ASP X 270      47.134  34.233  36.319  0.00  0.00            
ATOM    820  CA  ASP X 270      45.710  32.890  36.315  0.00  0.00            
ATOM    821  HA  ASP X 270      45.360  32.022  36.854  0.00  0.00            
ATOM    822  CB  ASP X 270      44.556  33.941  36.367  0.00  0.00            
ATOM    823  HB1 ASP X 270      45.023  34.800  35.839  0.00  0.00            
ATOM    824  HB2 ASP X 270      44.401  34.264  37.419  0.00  0.00            
ATOM    825  CG  ASP X 270      43.182  33.496  35.850  0.00  0.00            
ATOM    826  OD1 ASP X 270      42.731  32.350  36.084  0.00  0.00            
ATOM    827  OD2 ASP X 270      42.560  34.347  35.148  0.00  0.00            
ATOM    828  C   ASP X 270      45.832  32.303  34.886  0.00  0.00            
ATOM    829  O   ASP X 270      46.680  32.758  34.051  0.00  0.00            
ATOM    830  N   THR X 271      44.985  31.311  34.526  0.00  0.00            
ATOM    831  HN  THR X 271      44.241  31.020  35.124  0.00  0.00            
ATOM    832  CA  THR X 271      45.212  30.618  33.283  0.00  0.00            
ATOM    833  HA  THR X 271      45.756  31.257  32.603  0.00  0.00            
ATOM    834  CB  THR X 271      46.012  29.366  33.569  0.00  0.00            
ATOM    835  HB  THR X 271      46.290  28.914  32.593  0.00  0.00            
ATOM    836  OG1 THR X 271      45.320  28.358  34.280  0.00  0.00            
ATOM    837  HG1 THR X 271      45.716  28.466  35.148  0.00  0.00            
ATOM    838  CG2 THR X 271      47.380  29.563  34.285  0.00  0.00            
ATOM    839 HG21 THR X 271      47.184  29.945  35.310  0.00  0.00            
ATOM    840 HG22 THR X 271      48.076  30.235  33.737  0.00  0.00            
ATOM    841 HG23 THR X 271      47.904  28.595  34.435  0.00  0.00            
ATOM    842  C   THR X 271      43.940  30.258  32.589  0.00  0.00            
ATOM    843  O   THR X 271      42.846  30.434  33.093  0.00  0.00            
ATOM    844  N   ALA X 272      44.025  29.806  31.259  0.00  0.00            
ATOM    845  HN  ALA X 272      44.856  29.503  30.798  0.00  0.00            
ATOM    846  CA  ALA X 272      42.886  29.161  30.560  0.00  0.00            
ATOM    847  HA  ALA X 272      42.057  29.853  30.531  0.00  0.00            
ATOM    848  CB  ALA X 272      43.212  28.893  29.059  0.00  0.00            
ATOM    849  HB1 ALA X 272      43.502  29.867  28.610  0.00  0.00            
ATOM    850  HB2 ALA X 272      42.288  28.522  28.565  0.00  0.00            
ATOM    851  HB3 ALA X 272      44.032  28.147  29.000  0.00  0.00            
ATOM    852  C   ALA X 272      42.313  27.910  31.194  0.00  0.00            
ATOM    853  O   ALA X 272      42.956  26.933  31.622  0.00  0.00            
ATOM    854  N   GLY X 273      40.951  27.898  31.150  0.00  0.00            
ATOM    855  HN  GLY X 273      40.521  28.702  30.747  0.00  0.00            
ATOM    856  CA  GLY X 273      40.129  26.897  31.777  0.00  0.00            
ATOM    857  HA1 GLY X 273      39.126  27.233  31.556  0.00  0.00            
ATOM    858  HA2 GLY X 273      40.470  26.783  32.795  0.00  0.00            
ATOM    859  C   GLY X 273      40.299  25.592  31.062  0.00  0.00            
ATOM    860  O   GLY X 273      40.104  25.546  29.835  0.00  0.00            
ATOM    861  N   LEU X 274      40.633  24.544  31.797  0.00  0.00            
ATOM    862  HN  LEU X 274      40.551  24.555  32.791  0.00  0.00            
ATOM    863  CA  LEU X 274      40.949  23.238  31.224  0.00  0.00            
ATOM    864  HA  LEU X 274      41.458  23.372  30.280  0.00  0.00            
ATOM    865  CB  LEU X 274      41.803  22.486  32.273  0.00  0.00            
ATOM    866  HB1 LEU X 274      42.092  21.506  31.837  0.00  0.00            
ATOM    867  HB2 LEU X 274      41.038  22.468  33.079  0.00  0.00            
ATOM    868  CG  LEU X 274      43.066  23.243  32.720  0.00  0.00            
ATOM    869  HG  LEU X 274      42.730  24.233  33.096  0.00  0.00            
ATOM    870  CD1 LEU X 274      43.814  22.517  33.807  0.00  0.00            
ATOM    871 HD11 LEU X 274      44.711  23.024  34.223  0.00  0.00            
ATOM    872 HD12 LEU X 274      44.118  21.493  33.503  0.00  0.00            
ATOM    873 HD13 LEU X 274      43.064  22.381  34.615  0.00  0.00            
ATOM    874  CD2 LEU X 274      44.049  23.379  31.563  0.00  0.00            
ATOM    875 HD21 LEU X 274      44.345  22.370  31.205  0.00  0.00            
ATOM    876 HD22 LEU X 274      43.589  23.941  30.722  0.00  0.00            
ATOM    877 HD23 LEU X 274      44.867  24.014  31.966  0.00  0.00            
ATOM    878  C   LEU X 274      39.766  22.347  30.829  0.00  0.00            
ATOM    879  O   LEU X 274      39.092  21.818  31.706  0.00  0.00            
ATOM    880  N   ARG X 275      39.543  22.181  29.510  0.00  0.00            
ATOM    881  HN  ARG X 275      40.125  22.596  28.814  0.00  0.00            
ATOM    882  CA  ARG X 275      38.547  21.347  28.975  0.00  0.00            
ATOM    883  HA  ARG X 275      38.515  20.388  29.470  0.00  0.00            
ATOM    884  CB  ARG X 275      37.174  22.052  29.002  0.00  0.00            
ATOM    885  HB1 ARG X 275      37.064  22.390  30.055  0.00  0.00            
ATOM    886  HB2 ARG X 275      36.470  21.234  28.739  0.00  0.00            
ATOM    887  CG  ARG X 275      37.060  23.251  28.023  0.00  0.00            
ATOM    888  HG1 ARG X 275      37.434  23.022  27.002  0.00  0.00            
ATOM    889  HG2 ARG X 275      37.639  24.084  28.476  0.00  0.00            
ATOM    890  CD  ARG X 275      35.621  23.748  27.653  0.00  0.00            
ATOM    891  HD1 ARG X 275      34.916  23.808  28.509  0.00  0.00            
ATOM    892  HD2 ARG X 275      35.360  22.984  26.890  0.00  0.00            
ATOM    893  NE  ARG X 275      35.680  25.112  26.944  0.00  0.00            
ATOM    894  HE  ARG X 275      36.579  25.505  26.746  0.00  0.00            
ATOM    895  CZ  ARG X 275      34.757  26.056  26.929  0.00  0.00            
ATOM    896  NH1 ARG X 275      33.491  25.768  27.232  0.00  0.00            
ATOM    897 HH11 ARG X 275      33.309  24.821  27.496  0.00  0.00            
ATOM    898 HH12 ARG X 275      32.789  26.456  27.051  0.00  0.00            
ATOM    899  NH2 ARG X 275      35.119  27.251  26.497  0.00  0.00            
ATOM    900 HH21 ARG X 275      36.053  27.504  26.244  0.00  0.00            
ATOM    901 HH22 ARG X 275      34.399  27.945  26.466  0.00  0.00            
ATOM    902  C   ARG X 275      38.864  20.872  27.585  0.00  0.00            
ATOM    903  O   ARG X 275      39.857  21.263  26.938  0.00  0.00            
ATOM    904  N   GLU X 276      37.991  19.958  27.028  0.00  0.00            
ATOM    905  HN  GLU X 276      37.202  19.625  27.539  0.00  0.00            
ATOM    906  CA  GLU X 276      38.000  19.663  25.559  0.00  0.00            
ATOM    907  HA  GLU X 276      39.062  19.532  25.413  0.00  0.00            
ATOM    908  CB  GLU X 276      37.332  18.228  25.262  0.00  0.00            
ATOM    909  HB1 GLU X 276      36.251  18.483  25.299  0.00  0.00            
ATOM    910  HB2 GLU X 276      37.746  17.517  26.009  0.00  0.00            
ATOM    911  CG  GLU X 276      37.842  17.749  23.928  0.00  0.00            
ATOM    912  HG1 GLU X 276      38.948  17.666  23.977  0.00  0.00            
ATOM    913  HG2 GLU X 276      37.588  18.547  23.197  0.00  0.00            
ATOM    914  CD  GLU X 276      37.204  16.551  23.340  0.00  0.00            
ATOM    915  OE1 GLU X 276      37.528  15.398  23.741  0.00  0.00            
ATOM    916  OE2 GLU X 276      36.395  16.796  22.433  0.00  0.00            
ATOM    917  C   GLU X 276      37.461  20.798  24.711  0.00  0.00            
ATOM    918  O   GLU X 276      36.409  20.780  24.105  0.00  0.00            
ATOM    919  N   ALA X 277      38.265  21.892  24.593  0.00  0.00            
ATOM    920  HN  ALA X 277      39.111  21.926  25.119  0.00  0.00            
ATOM    921  CA  ALA X 277      38.026  23.073  23.741  0.00  0.00            
ATOM    922  HA  ALA X 277      37.106  23.493  24.122  0.00  0.00            
ATOM    923  CB  ALA X 277      39.012  24.164  23.961  0.00  0.00            
ATOM    924  HB1 ALA X 277      38.700  25.179  23.637  0.00  0.00            
ATOM    925  HB2 ALA X 277      39.934  23.992  23.365  0.00  0.00            
ATOM    926  HB3 ALA X 277      39.237  24.218  25.048  0.00  0.00            
ATOM    927  C   ALA X 277      37.966  22.810  22.269  0.00  0.00            
ATOM    928  O   ALA X 277      38.783  21.994  21.790  0.00  0.00            
ATOM    929  N   SER X 278      37.126  23.499  21.522  0.00  0.00            
ATOM    930  HN  SER X 278      36.367  24.045  21.868  0.00  0.00            
ATOM    931  CA  SER X 278      37.070  23.376  20.048  0.00  0.00            
ATOM    932  HA  SER X 278      37.711  22.580  19.698  0.00  0.00            
ATOM    933  CB  SER X 278      35.681  23.053  19.539  0.00  0.00            
ATOM    934  HB1 SER X 278      35.370  22.039  19.870  0.00  0.00            
ATOM    935  HB2 SER X 278      35.693  23.007  18.429  0.00  0.00            
ATOM    936  OG  SER X 278      34.718  23.992  20.077  0.00  0.00            
ATOM    937  HG1 SER X 278      33.859  23.683  19.782  0.00  0.00            
ATOM    938  C   SER X 278      37.608  24.613  19.438  0.00  0.00            
ATOM    939  O   SER X 278      37.894  24.635  18.275  0.00  0.00            
ATOM    940  N   ASP X 279      37.693  25.755  20.100  0.00  0.00            
ATOM    941  HN  ASP X 279      37.507  25.633  21.072  0.00  0.00            
ATOM    942  CA  ASP X 279      37.990  27.021  19.619  0.00  0.00            
ATOM    943  HA  ASP X 279      37.614  27.159  18.616  0.00  0.00            
ATOM    944  CB  ASP X 279      37.372  28.164  20.492  0.00  0.00            
ATOM    945  HB1 ASP X 279      37.806  28.243  21.511  0.00  0.00            
ATOM    946  HB2 ASP X 279      36.295  27.902  20.412  0.00  0.00            
ATOM    947  CG  ASP X 279      37.418  29.483  19.784  0.00  0.00            
ATOM    948  OD1 ASP X 279      37.577  30.541  20.434  0.00  0.00            
ATOM    949  OD2 ASP X 279      37.236  29.487  18.544  0.00  0.00            
ATOM    950  C   ASP X 279      39.517  27.098  19.480  0.00  0.00            
ATOM    951  O   ASP X 279      40.219  26.714  20.404  0.00  0.00            
ATOM    952  N   GLU X 280      40.114  27.517  18.311  0.00  0.00            
ATOM    953  HN  GLU X 280      39.665  27.980  17.550  0.00  0.00            
ATOM    954  CA  GLU X 280      41.546  27.381  18.059  0.00  0.00            
ATOM    955  HA  GLU X 280      41.780  26.326  18.061  0.00  0.00            
ATOM    956  CB  GLU X 280      41.909  27.841  16.630  0.00  0.00            
ATOM    957  HB1 GLU X 280      41.575  28.897  16.538  0.00  0.00            
ATOM    958  HB2 GLU X 280      41.279  27.233  15.947  0.00  0.00            
ATOM    959  CG  GLU X 280      43.426  27.998  16.295  0.00  0.00            
ATOM    960  HG1 GLU X 280      43.978  27.037  16.381  0.00  0.00            
ATOM    961  HG2 GLU X 280      43.959  28.700  16.970  0.00  0.00            
ATOM    962  CD  GLU X 280      43.554  28.332  14.777  0.00  0.00            
ATOM    963  OE1 GLU X 280      42.838  27.677  13.975  0.00  0.00            
ATOM    964  OE2 GLU X 280      44.257  29.313  14.394  0.00  0.00            
ATOM    965  C   GLU X 280      42.509  28.108  19.027  0.00  0.00            
ATOM    966  O   GLU X 280      43.400  27.518  19.555  0.00  0.00            
ATOM    967  N   VAL X 281      42.167  29.354  19.386  0.00  0.00            
ATOM    968  HN  VAL X 281      41.339  29.699  18.952  0.00  0.00            
ATOM    969  CA  VAL X 281      42.884  30.256  20.271  0.00  0.00            
ATOM    970  HA  VAL X 281      43.932  30.222  20.011  0.00  0.00            
ATOM    971  CB  VAL X 281      42.335  31.672  20.209  0.00  0.00            
ATOM    972  HB  VAL X 281      41.273  31.690  20.532  0.00  0.00            
ATOM    973  CG1 VAL X 281      43.202  32.530  21.077  0.00  0.00            
ATOM    974 HG11 VAL X 281      44.277  32.396  20.830  0.00  0.00            
ATOM    975 HG12 VAL X 281      42.943  33.592  20.879  0.00  0.00            
ATOM    976 HG13 VAL X 281      43.033  32.385  22.165  0.00  0.00            
ATOM    977  CG2 VAL X 281      42.386  32.220  18.752  0.00  0.00            
ATOM    978 HG21 VAL X 281      42.296  33.328  18.735  0.00  0.00            
ATOM    979 HG22 VAL X 281      41.590  31.868  18.062  0.00  0.00            
ATOM    980 HG23 VAL X 281      43.381  31.831  18.445  0.00  0.00            
ATOM    981  C   VAL X 281      42.857  29.657  21.716  0.00  0.00            
ATOM    982  O   VAL X 281      43.804  29.609  22.423  0.00  0.00            
ATOM    983  N   GLU X 282      41.641  29.113  22.073  0.00  0.00            
ATOM    984  HN  GLU X 282      40.877  29.014  21.441  0.00  0.00            
ATOM    985  CA  GLU X 282      41.441  28.371  23.314  0.00  0.00            
ATOM    986  HA  GLU X 282      41.791  29.083  24.046  0.00  0.00            
ATOM    987  CB  GLU X 282      39.929  27.955  23.466  0.00  0.00            
ATOM    988  HB1 GLU X 282      39.782  27.029  22.870  0.00  0.00            
ATOM    989  HB2 GLU X 282      39.307  28.766  23.031  0.00  0.00            
ATOM    990  CG  GLU X 282      39.498  27.792  24.928  0.00  0.00            
ATOM    991  HG1 GLU X 282      39.621  28.733  25.505  0.00  0.00            
ATOM    992  HG2 GLU X 282      40.217  27.110  25.431  0.00  0.00            
ATOM    993  CD  GLU X 282      38.036  27.493  25.189  0.00  0.00            
ATOM    994  OE1 GLU X 282      37.774  26.647  26.063  0.00  0.00            
ATOM    995  OE2 GLU X 282      37.117  28.178  24.629  0.00  0.00            
ATOM    996  C   GLU X 282      42.265  27.120  23.411  0.00  0.00            
ATOM    997  O   GLU X 282      42.763  26.691  24.451  0.00  0.00            
ATOM    998  N   ARG X 283      42.406  26.333  22.305  0.00  0.00            
ATOM    999  HN  ARG X 283      41.899  26.438  21.453  0.00  0.00            
ATOM   1000  CA  ARG X 283      43.320  25.169  22.285  0.00  0.00            
ATOM   1001  HA  ARG X 283      43.094  24.501  23.103  0.00  0.00            
ATOM   1002  CB  ARG X 283      43.079  24.298  20.985  0.00  0.00            
ATOM   1003  HB1 ARG X 283      43.768  23.430  21.061  0.00  0.00            
ATOM   1004  HB2 ARG X 283      43.356  24.915  20.104  0.00  0.00            
ATOM   1005  CG  ARG X 283      41.643  23.710  20.969  0.00  0.00            
ATOM   1006  HG1 ARG X 283      40.864  24.490  20.839  0.00  0.00            
ATOM   1007  HG2 ARG X 283      41.569  23.250  21.978  0.00  0.00            
ATOM   1008  CD  ARG X 283      41.584  22.598  19.926  0.00  0.00            
ATOM   1009  HD1 ARG X 283      40.992  21.727  20.279  0.00  0.00            
ATOM   1010  HD2 ARG X 283      42.620  22.267  19.697  0.00  0.00            
ATOM   1011  NE  ARG X 283      40.890  23.218  18.731  0.00  0.00            
ATOM   1012  HE  ARG X 283      39.954  23.542  18.868  0.00  0.00            
ATOM   1013  CZ  ARG X 283      41.347  23.391  17.500  0.00  0.00            
ATOM   1014  NH1 ARG X 283      40.675  24.013  16.517  0.00  0.00            
ATOM   1015 HH11 ARG X 283      39.706  24.231  16.627  0.00  0.00            
ATOM   1016 HH12 ARG X 283      41.146  24.485  15.771  0.00  0.00            
ATOM   1017  NH2 ARG X 283      42.543  22.891  17.173  0.00  0.00            
ATOM   1018 HH21 ARG X 283      42.828  22.151  17.781  0.00  0.00            
ATOM   1019 HH22 ARG X 283      42.784  22.844  16.203  0.00  0.00            
ATOM   1020  C   ARG X 283      44.793  25.436  22.503  0.00  0.00            
ATOM   1021  O   ARG X 283      45.480  24.778  23.332  0.00  0.00            
ATOM   1022  N   ILE X 284      45.342  26.477  21.847  0.00  0.00            
ATOM   1023  HN  ILE X 284      44.790  26.975  21.183  0.00  0.00            
ATOM   1024  CA  ILE X 284      46.654  27.027  22.095  0.00  0.00            
ATOM   1025  HA  ILE X 284      47.440  26.287  22.085  0.00  0.00            
ATOM   1026  CB  ILE X 284      46.985  28.082  21.086  0.00  0.00            
ATOM   1027  HB  ILE X 284      46.289  28.948  21.079  0.00  0.00            
ATOM   1028  CG2 ILE X 284      48.384  28.691  21.291  0.00  0.00            
ATOM   1029 HG21 ILE X 284      49.149  27.943  20.991  0.00  0.00            
ATOM   1030 HG22 ILE X 284      48.654  28.992  22.326  0.00  0.00            
ATOM   1031 HG23 ILE X 284      48.488  29.496  20.533  0.00  0.00            
ATOM   1032  CG1 ILE X 284      46.870  27.522  19.689  0.00  0.00            
ATOM   1033 HG11 ILE X 284      45.873  27.065  19.509  0.00  0.00            
ATOM   1034 HG12 ILE X 284      47.584  26.686  19.531  0.00  0.00            
ATOM   1035  CD  ILE X 284      47.103  28.558  18.579  0.00  0.00            
ATOM   1036  HD1 ILE X 284      46.370  29.380  18.723  0.00  0.00            
ATOM   1037  HD2 ILE X 284      46.751  28.140  17.611  0.00  0.00            
ATOM   1038  HD3 ILE X 284      48.107  28.995  18.391  0.00  0.00            
ATOM   1039  C   ILE X 284      46.888  27.484  23.568  0.00  0.00            
ATOM   1040  O   ILE X 284      47.820  27.242  24.330  0.00  0.00            
ATOM   1041  N   GLY X 285      45.882  28.225  24.019  0.00  0.00            
ATOM   1042  HN  GLY X 285      45.072  28.281  23.441  0.00  0.00            
ATOM   1043  CA  GLY X 285      45.811  28.900  25.297  0.00  0.00            
ATOM   1044  HA1 GLY X 285      44.938  29.535  25.326  0.00  0.00            
ATOM   1045  HA2 GLY X 285      46.691  29.513  25.431  0.00  0.00            
ATOM   1046  C   GLY X 285      45.759  27.975  26.519  0.00  0.00            
ATOM   1047  O   GLY X 285      46.227  28.221  27.596  0.00  0.00            
ATOM   1048  N   ILE X 286      45.151  26.789  26.334  0.00  0.00            
ATOM   1049  HN  ILE X 286      44.573  26.630  25.538  0.00  0.00            
ATOM   1050  CA  ILE X 286      45.331  25.720  27.297  0.00  0.00            
ATOM   1051  HA  ILE X 286      45.075  26.060  28.289  0.00  0.00            
ATOM   1052  CB  ILE X 286      44.279  24.646  27.115  0.00  0.00            
ATOM   1053  HB  ILE X 286      44.166  24.408  26.035  0.00  0.00            
ATOM   1054  CG2 ILE X 286      44.633  23.361  27.874  0.00  0.00            
ATOM   1055 HG21 ILE X 286      45.588  22.867  27.595  0.00  0.00            
ATOM   1056 HG22 ILE X 286      43.757  22.680  27.817  0.00  0.00            
ATOM   1057 HG23 ILE X 286      44.815  23.547  28.954  0.00  0.00            
ATOM   1058  CG1 ILE X 286      42.863  25.206  27.484  0.00  0.00            
ATOM   1059 HG11 ILE X 286      42.789  26.233  27.066  0.00  0.00            
ATOM   1060 HG12 ILE X 286      42.741  25.360  28.577  0.00  0.00            
ATOM   1061  CD  ILE X 286      41.724  24.350  26.940  0.00  0.00            
ATOM   1062  HD1 ILE X 286      41.769  23.254  27.121  0.00  0.00            
ATOM   1063  HD2 ILE X 286      41.656  24.527  25.845  0.00  0.00            
ATOM   1064  HD3 ILE X 286      40.803  24.728  27.433  0.00  0.00            
ATOM   1065  C   ILE X 286      46.759  25.082  27.399  0.00  0.00            
ATOM   1066  O   ILE X 286      47.300  24.836  28.469  0.00  0.00            
ATOM   1067  N   GLU X 287      47.389  24.746  26.269  0.00  0.00            
ATOM   1068  HN  GLU X 287      46.965  24.897  25.379  0.00  0.00            
ATOM   1069  CA  GLU X 287      48.721  24.146  26.204  0.00  0.00            
ATOM   1070  HA  GLU X 287      48.723  23.310  26.888  0.00  0.00            
ATOM   1071  CB  GLU X 287      49.162  23.829  24.795  0.00  0.00            
ATOM   1072  HB1 GLU X 287      50.157  23.344  24.897  0.00  0.00            
ATOM   1073  HB2 GLU X 287      49.224  24.798  24.255  0.00  0.00            
ATOM   1074  CG  GLU X 287      48.212  22.802  24.069  0.00  0.00            
ATOM   1075  HG1 GLU X 287      47.197  23.254  24.049  0.00  0.00            
ATOM   1076  HG2 GLU X 287      48.050  21.981  24.801  0.00  0.00            
ATOM   1077  CD  GLU X 287      48.585  22.324  22.696  0.00  0.00            
ATOM   1078  OE1 GLU X 287      48.896  21.133  22.486  0.00  0.00            
ATOM   1079  OE2 GLU X 287      48.796  23.175  21.771  0.00  0.00            
ATOM   1080  C   GLU X 287      49.729  25.051  26.883  0.00  0.00            
ATOM   1081  O   GLU X 287      50.767  24.654  27.446  0.00  0.00            
ATOM   1082  N   ARG X 288      49.520  26.382  26.827  0.00  0.00            
ATOM   1083  HN  ARG X 288      48.722  26.638  26.287  0.00  0.00            
ATOM   1084  CA  ARG X 288      50.366  27.405  27.435  0.00  0.00            
ATOM   1085  HA  ARG X 288      51.379  27.082  27.243  0.00  0.00            
ATOM   1086  CB  ARG X 288      50.150  28.840  26.831  0.00  0.00            
ATOM   1087  HB1 ARG X 288      50.767  29.498  27.479  0.00  0.00            
ATOM   1088  HB2 ARG X 288      49.086  29.157  26.832  0.00  0.00            
ATOM   1089  CG  ARG X 288      50.704  28.895  25.386  0.00  0.00            
ATOM   1090  HG1 ARG X 288      50.566  27.935  24.844  0.00  0.00            
ATOM   1091  HG2 ARG X 288      51.795  29.049  25.529  0.00  0.00            
ATOM   1092  CD  ARG X 288      50.129  30.108  24.673  0.00  0.00            
ATOM   1093  HD1 ARG X 288      50.213  31.017  25.306  0.00  0.00            
ATOM   1094  HD2 ARG X 288      49.145  29.843  24.231  0.00  0.00            
ATOM   1095  NE  ARG X 288      50.978  30.365  23.511  0.00  0.00            
ATOM   1096  HE  ARG X 288      51.751  29.757  23.329  0.00  0.00            
ATOM   1097  CZ  ARG X 288      50.642  31.183  22.503  0.00  0.00            
ATOM   1098  NH1 ARG X 288      49.477  31.902  22.524  0.00  0.00            
ATOM   1099 HH11 ARG X 288      48.770  31.735  23.211  0.00  0.00            
ATOM   1100 HH12 ARG X 288      49.384  32.714  21.948  0.00  0.00            
ATOM   1101  NH2 ARG X 288      51.450  31.351  21.501  0.00  0.00            
ATOM   1102 HH21 ARG X 288      52.291  30.827  21.368  0.00  0.00            
ATOM   1103 HH22 ARG X 288      51.177  32.131  20.938  0.00  0.00            
ATOM   1104  C   ARG X 288      50.052  27.393  28.917  0.00  0.00            
ATOM   1105  O   ARG X 288      50.911  27.745  29.746  0.00  0.00            
ATOM   1106  N   ALA X 289      48.779  27.086  29.343  0.00  0.00            
ATOM   1107  HN  ALA X 289      48.081  26.783  28.698  0.00  0.00            
ATOM   1108  CA  ALA X 289      48.455  27.043  30.754  0.00  0.00            
ATOM   1109  HA  ALA X 289      48.782  27.942  31.255  0.00  0.00            
ATOM   1110  CB  ALA X 289      46.977  26.786  30.898  0.00  0.00            
ATOM   1111  HB1 ALA X 289      46.636  25.854  30.400  0.00  0.00            
ATOM   1112  HB2 ALA X 289      46.288  27.644  30.743  0.00  0.00            
ATOM   1113  HB3 ALA X 289      46.754  26.597  31.969  0.00  0.00            
ATOM   1114  C   ALA X 289      49.001  25.833  31.508  0.00  0.00            
ATOM   1115  O   ALA X 289      49.402  25.926  32.639  0.00  0.00            
ATOM   1116  N   TRP X 290      49.056  24.685  30.775  0.00  0.00            
ATOM   1117  HN  TRP X 290      48.421  24.756  30.010  0.00  0.00            
ATOM   1118  CA  TRP X 290      49.648  23.415  31.295  0.00  0.00            
ATOM   1119  HA  TRP X 290      49.334  23.326  32.325  0.00  0.00            
ATOM   1120  CB  TRP X 290      49.136  22.171  30.480  0.00  0.00            
ATOM   1121  HB1 TRP X 290      50.007  21.488  30.390  0.00  0.00            
ATOM   1122  HB2 TRP X 290      48.899  22.615  29.489  0.00  0.00            
ATOM   1123  CG  TRP X 290      48.031  21.470  31.184  0.00  0.00            
ATOM   1124  CD1 TRP X 290      46.846  21.162  30.552  0.00  0.00            
ATOM   1125  HD1 TRP X 290      46.592  21.605  29.601  0.00  0.00            
ATOM   1126  NE1 TRP X 290      46.146  20.332  31.373  0.00  0.00            
ATOM   1127  HE1 TRP X 290      45.268  19.957  31.171  0.00  0.00            
ATOM   1128  CE2 TRP X 290      47.001  19.977  32.446  0.00  0.00            
ATOM   1129  CD2 TRP X 290      48.181  20.634  32.349  0.00  0.00            
ATOM   1130  CE3 TRP X 290      49.258  20.372  33.201  0.00  0.00            
ATOM   1131  HE3 TRP X 290      50.162  20.963  33.177  0.00  0.00            
ATOM   1132  CZ3 TRP X 290      49.096  19.414  34.288  0.00  0.00            
ATOM   1133  HZ3 TRP X 290      49.857  19.326  35.049  0.00  0.00            
ATOM   1134  CZ2 TRP X 290      46.791  19.061  33.507  0.00  0.00            
ATOM   1135  HZ2 TRP X 290      45.891  18.465  33.514  0.00  0.00            
ATOM   1136  CH2 TRP X 290      47.878  18.724  34.326  0.00  0.00            
ATOM   1137  HH2 TRP X 290      47.829  17.976  35.103  0.00  0.00            
ATOM   1138  C   TRP X 290      51.171  23.548  31.494  0.00  0.00            
ATOM   1139  O   TRP X 290      51.744  22.897  32.384  0.00  0.00            
ATOM   1140  N   GLN X 291      51.823  24.314  30.633  0.00  0.00            
ATOM   1141  HN  GLN X 291      51.346  24.718  29.856  0.00  0.00            
ATOM   1142  CA  GLN X 291      53.211  24.710  30.624  0.00  0.00            
ATOM   1143  HA  GLN X 291      53.702  23.748  30.631  0.00  0.00            
ATOM   1144  CB  GLN X 291      53.607  25.469  29.330  0.00  0.00            
ATOM   1145  HB1 GLN X 291      53.024  26.411  29.250  0.00  0.00            
ATOM   1146  HB2 GLN X 291      53.304  24.782  28.511  0.00  0.00            
ATOM   1147  CG  GLN X 291      55.143  25.827  29.287  0.00  0.00            
ATOM   1148  HG1 GLN X 291      55.682  24.890  29.541  0.00  0.00            
ATOM   1149  HG2 GLN X 291      55.418  26.427  30.181  0.00  0.00            
ATOM   1150  CD  GLN X 291      55.563  26.547  27.981  0.00  0.00            
ATOM   1151  OE1 GLN X 291      56.553  26.234  27.296  0.00  0.00            
ATOM   1152  NE2 GLN X 291      54.887  27.708  27.678  0.00  0.00            
ATOM   1153 HE21 GLN X 291      55.076  28.116  26.785  0.00  0.00            
ATOM   1154 HE22 GLN X 291      54.138  28.018  28.264  0.00  0.00            
ATOM   1155  C   GLN X 291      53.536  25.431  31.912  0.00  0.00            
ATOM   1156  O   GLN X 291      54.559  25.243  32.564  0.00  0.00            
ATOM   1157  N   GLU X 292      52.714  26.377  32.342  0.00  0.00            
ATOM   1158  HN  GLU X 292      51.949  26.648  31.763  0.00  0.00            
ATOM   1159  CA  GLU X 292      52.902  27.047  33.617  0.00  0.00            
ATOM   1160  HA  GLU X 292      53.938  27.354  33.614  0.00  0.00            
ATOM   1161  CB  GLU X 292      51.956  28.241  33.816  0.00  0.00            
ATOM   1162  HB1 GLU X 292      52.069  28.657  34.840  0.00  0.00            
ATOM   1163  HB2 GLU X 292      50.976  27.784  33.561  0.00  0.00            
ATOM   1164  CG  GLU X 292      52.061  29.351  32.807  0.00  0.00            
ATOM   1165  HG1 GLU X 292      51.254  30.101  32.947  0.00  0.00            
ATOM   1166  HG2 GLU X 292      51.845  28.943  31.796  0.00  0.00            
ATOM   1167  CD  GLU X 292      53.445  30.050  32.799  0.00  0.00            
ATOM   1168  OE1 GLU X 292      53.972  30.503  33.868  0.00  0.00            
ATOM   1169  OE2 GLU X 292      54.007  30.133  31.719  0.00  0.00            
ATOM   1170  C   GLU X 292      52.780  26.099  34.746  0.00  0.00            
ATOM   1171  O   GLU X 292      53.548  26.116  35.728  0.00  0.00            
ATOM   1172  N   ILE X 293      51.764  25.210  34.695  0.00  0.00            
ATOM   1173  HN  ILE X 293      51.239  25.229  33.848  0.00  0.00            
ATOM   1174  CA  ILE X 293      51.501  24.262  35.739  0.00  0.00            
ATOM   1175  HA  ILE X 293      51.308  24.792  36.660  0.00  0.00            
ATOM   1176  CB  ILE X 293      50.191  23.458  35.442  0.00  0.00            
ATOM   1177  HB  ILE X 293      50.364  22.934  34.478  0.00  0.00            
ATOM   1178  CG2 ILE X 293      49.924  22.381  36.526  0.00  0.00            
ATOM   1179 HG21 ILE X 293      48.917  21.994  36.259  0.00  0.00            
ATOM   1180 HG22 ILE X 293      49.818  22.705  37.584  0.00  0.00            
ATOM   1181 HG23 ILE X 293      50.682  21.575  36.430  0.00  0.00            
ATOM   1182  CG1 ILE X 293      49.059  24.459  35.311  0.00  0.00            
ATOM   1183 HG11 ILE X 293      49.308  25.334  34.673  0.00  0.00            
ATOM   1184 HG12 ILE X 293      48.835  24.752  36.359  0.00  0.00            
ATOM   1185  CD  ILE X 293      47.736  23.840  34.804  0.00  0.00            
ATOM   1186  HD1 ILE X 293      47.054  24.608  34.380  0.00  0.00            
ATOM   1187  HD2 ILE X 293      47.183  23.169  35.495  0.00  0.00            
ATOM   1188  HD3 ILE X 293      47.851  23.314  33.833  0.00  0.00            
ATOM   1189  C   ILE X 293      52.629  23.271  36.053  0.00  0.00            
ATOM   1190  O   ILE X 293      52.924  22.973  37.197  0.00  0.00            
ATOM   1191  N   GLU X 294      53.287  22.686  35.031  0.00  0.00            
ATOM   1192  HN  GLU X 294      53.055  22.806  34.068  0.00  0.00            
ATOM   1193  CA  GLU X 294      54.508  21.877  35.282  0.00  0.00            
ATOM   1194  HA  GLU X 294      54.354  21.120  36.037  0.00  0.00            
ATOM   1195  CB  GLU X 294      54.854  20.997  34.029  0.00  0.00            
ATOM   1196  HB1 GLU X 294      55.735  20.388  34.326  0.00  0.00            
ATOM   1197  HB2 GLU X 294      55.140  21.632  33.164  0.00  0.00            
ATOM   1198  CG  GLU X 294      53.761  19.928  33.648  0.00  0.00            
ATOM   1199  HG1 GLU X 294      52.821  20.440  33.350  0.00  0.00            
ATOM   1200  HG2 GLU X 294      53.480  19.303  34.522  0.00  0.00            
ATOM   1201  CD  GLU X 294      54.150  19.000  32.492  0.00  0.00            
ATOM   1202  OE1 GLU X 294      53.674  19.230  31.333  0.00  0.00            
ATOM   1203  OE2 GLU X 294      54.796  17.972  32.747  0.00  0.00            
ATOM   1204  C   GLU X 294      55.814  22.602  35.661  0.00  0.00            
ATOM   1205  O   GLU X 294      56.751  21.964  36.109  0.00  0.00            
ATOM   1206  N   GLN X 295      55.845  23.976  35.488  0.00  0.00            
ATOM   1207  HN  GLN X 295      55.172  24.519  34.991  0.00  0.00            
ATOM   1208  CA  GLN X 295      56.971  24.767  36.032  0.00  0.00            
ATOM   1209  HA  GLN X 295      57.803  24.089  36.153  0.00  0.00            
ATOM   1210  CB  GLN X 295      57.428  25.800  34.950  0.00  0.00            
ATOM   1211  HB1 GLN X 295      58.383  26.264  35.278  0.00  0.00            
ATOM   1212  HB2 GLN X 295      56.688  26.597  34.725  0.00  0.00            
ATOM   1213  CG  GLN X 295      57.745  25.027  33.599  0.00  0.00            
ATOM   1214  HG1 GLN X 295      58.090  25.838  32.924  0.00  0.00            
ATOM   1215  HG2 GLN X 295      56.896  24.426  33.208  0.00  0.00            
ATOM   1216  CD  GLN X 295      58.992  24.107  33.666  0.00  0.00            
ATOM   1217  OE1 GLN X 295      60.100  24.450  34.123  0.00  0.00            
ATOM   1218  NE2 GLN X 295      58.815  22.809  33.298  0.00  0.00            
ATOM   1219 HE21 GLN X 295      59.582  22.169  33.353  0.00  0.00            
ATOM   1220 HE22 GLN X 295      57.914  22.540  32.960  0.00  0.00            
ATOM   1221  C   GLN X 295      56.610  25.460  37.298  0.00  0.00            
ATOM   1222  O   GLN X 295      57.375  26.316  37.795  0.00  0.00            
ATOM   1223  N   ALA X 296      55.430  25.186  37.882  0.00  0.00            
ATOM   1224  HN  ALA X 296      54.753  24.625  37.412  0.00  0.00            
ATOM   1225  CA  ALA X 296      55.070  25.770  39.157  0.00  0.00            
ATOM   1226  HA  ALA X 296      55.101  26.849  39.105  0.00  0.00            
ATOM   1227  CB  ALA X 296      53.598  25.532  39.377  0.00  0.00            
ATOM   1228  HB1 ALA X 296      53.241  26.277  40.121  0.00  0.00            
ATOM   1229  HB2 ALA X 296      53.441  24.597  39.955  0.00  0.00            
ATOM   1230  HB3 ALA X 296      53.056  25.433  38.412  0.00  0.00            
ATOM   1231  C   ALA X 296      55.941  25.459  40.343  0.00  0.00            
ATOM   1232  O   ALA X 296      56.537  24.392  40.465  0.00  0.00            
ATOM   1233  N   ASP X 297      55.972  26.403  41.364  0.00  0.00            
ATOM   1234  HN  ASP X 297      55.455  27.225  41.141  0.00  0.00            
ATOM   1235  CA  ASP X 297      56.420  26.138  42.666  0.00  0.00            
ATOM   1236  HA  ASP X 297      57.280  25.485  42.713  0.00  0.00            
ATOM   1237  CB  ASP X 297      56.851  27.465  43.265  0.00  0.00            
ATOM   1238  HB1 ASP X 297      57.116  27.298  44.331  0.00  0.00            
ATOM   1239  HB2 ASP X 297      56.168  28.332  43.140  0.00  0.00            
ATOM   1240  CG  ASP X 297      58.224  27.820  42.723  0.00  0.00            
ATOM   1241  OD1 ASP X 297      59.231  27.138  43.081  0.00  0.00            
ATOM   1242  OD2 ASP X 297      58.325  28.782  41.914  0.00  0.00            
ATOM   1243  C   ASP X 297      55.309  25.497  43.464  0.00  0.00            
ATOM   1244  O   ASP X 297      55.498  24.560  44.258  0.00  0.00            
ATOM   1245  N   ARG X 298      54.047  25.966  43.212  0.00  0.00            
ATOM   1246  HN  ARG X 298      53.849  26.790  42.688  0.00  0.00            
ATOM   1247  CA  ARG X 298      52.862  25.454  43.853  0.00  0.00            
ATOM   1248  HA  ARG X 298      52.893  24.377  43.935  0.00  0.00            
ATOM   1249  CB  ARG X 298      52.426  26.087  45.175  0.00  0.00            
ATOM   1250  HB1 ARG X 298      52.544  27.188  45.093  0.00  0.00            
ATOM   1251  HB2 ARG X 298      53.270  25.860  45.861  0.00  0.00            
ATOM   1252  CG  ARG X 298      51.108  25.620  45.800  0.00  0.00            
ATOM   1253  HG1 ARG X 298      50.857  24.538  45.808  0.00  0.00            
ATOM   1254  HG2 ARG X 298      50.284  26.019  45.170  0.00  0.00            
ATOM   1255  CD  ARG X 298      50.790  26.117  47.215  0.00  0.00            
ATOM   1256  HD1 ARG X 298      49.751  25.894  47.538  0.00  0.00            
ATOM   1257  HD2 ARG X 298      50.923  27.195  47.446  0.00  0.00            
ATOM   1258  NE  ARG X 298      51.842  25.540  48.059  0.00  0.00            
ATOM   1259  HE  ARG X 298      52.762  25.930  48.089  0.00  0.00            
ATOM   1260  CZ  ARG X 298      51.631  24.642  49.080  0.00  0.00            
ATOM   1261  NH1 ARG X 298      52.731  24.296  49.725  0.00  0.00            
ATOM   1262 HH11 ARG X 298      53.653  24.658  49.584  0.00  0.00            
ATOM   1263 HH12 ARG X 298      52.676  23.426  50.216  0.00  0.00            
ATOM   1264  NH2 ARG X 298      50.538  23.948  49.318  0.00  0.00            
ATOM   1265 HH21 ARG X 298      49.685  24.017  48.802  0.00  0.00            
ATOM   1266 HH22 ARG X 298      50.566  23.317  50.093  0.00  0.00            
ATOM   1267  C   ARG X 298      51.717  25.632  42.886  0.00  0.00            
ATOM   1268  O   ARG X 298      51.597  26.613  42.140  0.00  0.00            
ATOM   1269  N   VAL X 299      50.807  24.597  42.812  0.00  0.00            
ATOM   1270  HN  VAL X 299      50.926  23.795  43.393  0.00  0.00            
ATOM   1271  CA  VAL X 299      49.688  24.711  41.881  0.00  0.00            
ATOM   1272  HA  VAL X 299      49.749  25.643  41.340  0.00  0.00            
ATOM   1273  CB  VAL X 299      49.520  23.425  40.999  0.00  0.00            
ATOM   1274  HB  VAL X 299      49.519  22.491  41.600  0.00  0.00            
ATOM   1275  CG1 VAL X 299      48.416  23.647  40.046  0.00  0.00            
ATOM   1276 HG11 VAL X 299      47.521  24.102  40.521  0.00  0.00            
ATOM   1277 HG12 VAL X 299      48.663  24.354  39.226  0.00  0.00            
ATOM   1278 HG13 VAL X 299      48.228  22.675  39.544  0.00  0.00            
ATOM   1279  CG2 VAL X 299      50.835  23.422  40.204  0.00  0.00            
ATOM   1280 HG21 VAL X 299      50.777  24.368  39.624  0.00  0.00            
ATOM   1281 HG22 VAL X 299      50.903  22.585  39.477  0.00  0.00            
ATOM   1282 HG23 VAL X 299      51.791  23.542  40.757  0.00  0.00            
ATOM   1283  C   VAL X 299      48.505  24.735  42.837  0.00  0.00            
ATOM   1284  O   VAL X 299      48.406  24.058  43.862  0.00  0.00            
ATOM   1285  N   LEU X 300      47.565  25.642  42.659  0.00  0.00            
ATOM   1286  HN  LEU X 300      47.587  26.302  41.912  0.00  0.00            
ATOM   1287  CA  LEU X 300      46.338  25.763  43.431  0.00  0.00            
ATOM   1288  HA  LEU X 300      46.444  25.258  44.380  0.00  0.00            
ATOM   1289  CB  LEU X 300      46.116  27.279  43.600  0.00  0.00            
ATOM   1290  HB1 LEU X 300      45.222  27.545  44.203  0.00  0.00            
ATOM   1291  HB2 LEU X 300      46.051  27.863  42.658  0.00  0.00            
ATOM   1292  CG  LEU X 300      47.254  28.057  44.321  0.00  0.00            
ATOM   1293  HG  LEU X 300      48.159  28.083  43.677  0.00  0.00            
ATOM   1294  CD1 LEU X 300      46.800  29.416  44.660  0.00  0.00            
ATOM   1295 HD11 LEU X 300      47.655  30.115  44.782  0.00  0.00            
ATOM   1296 HD12 LEU X 300      46.196  29.475  45.591  0.00  0.00            
ATOM   1297 HD13 LEU X 300      46.079  29.776  43.896  0.00  0.00            
ATOM   1298  CD2 LEU X 300      47.795  27.397  45.567  0.00  0.00            
ATOM   1299 HD21 LEU X 300      48.271  26.460  45.207  0.00  0.00            
ATOM   1300 HD22 LEU X 300      48.561  28.002  46.097  0.00  0.00            
ATOM   1301 HD23 LEU X 300      46.891  27.202  46.183  0.00  0.00            
ATOM   1302  C   LEU X 300      45.155  25.261  42.570  0.00  0.00            
ATOM   1303  O   LEU X 300      44.717  25.816  41.554  0.00  0.00            
ATOM   1304  N   PHE X 301      44.548  24.144  42.958  0.00  0.00            
ATOM   1305  HN  PHE X 301      44.804  23.619  43.766  0.00  0.00            
ATOM   1306  CA  PHE X 301      43.639  23.458  42.100  0.00  0.00            
ATOM   1307  HA  PHE X 301      43.914  23.570  41.062  0.00  0.00            
ATOM   1308  CB  PHE X 301      43.679  21.921  42.373  0.00  0.00            
ATOM   1309  HB1 PHE X 301      43.344  21.805  43.425  0.00  0.00            
ATOM   1310  HB2 PHE X 301      44.735  21.611  42.218  0.00  0.00            
ATOM   1311  CG  PHE X 301      42.831  21.216  41.388  0.00  0.00            
ATOM   1312  CD1 PHE X 301      42.749  21.429  40.005  0.00  0.00            
ATOM   1313  HD1 PHE X 301      43.392  22.052  39.401  0.00  0.00            
ATOM   1314  CE1 PHE X 301      41.927  20.635  39.204  0.00  0.00            
ATOM   1315  HE1 PHE X 301      41.935  20.859  38.148  0.00  0.00            
ATOM   1316  CZ  PHE X 301      41.135  19.624  39.807  0.00  0.00            
ATOM   1317  HZ  PHE X 301      40.607  18.934  39.165  0.00  0.00            
ATOM   1318  CD2 PHE X 301      42.172  20.119  41.975  0.00  0.00            
ATOM   1319  HD2 PHE X 301      42.182  19.903  43.034  0.00  0.00            
ATOM   1320  CE2 PHE X 301      41.276  19.360  41.188  0.00  0.00            
ATOM   1321  HE2 PHE X 301      40.664  18.578  41.613  0.00  0.00            
ATOM   1322  C   PHE X 301      42.279  24.039  42.369  0.00  0.00            
ATOM   1323  O   PHE X 301      41.836  24.071  43.529  0.00  0.00            
ATOM   1324  N   MET X 302      41.567  24.622  41.376  0.00  0.00            
ATOM   1325  HN  MET X 302      41.899  24.423  40.457  0.00  0.00            
ATOM   1326  CA  MET X 302      40.285  25.262  41.674  0.00  0.00            
ATOM   1327  HA  MET X 302      40.138  25.261  42.744  0.00  0.00            
ATOM   1328  CB  MET X 302      40.178  26.709  41.117  0.00  0.00            
ATOM   1329  HB1 MET X 302      40.095  26.703  40.009  0.00  0.00            
ATOM   1330  HB2 MET X 302      41.101  27.254  41.407  0.00  0.00            
ATOM   1331  CG  MET X 302      38.956  27.398  41.596  0.00  0.00            
ATOM   1332  HG1 MET X 302      38.839  27.210  42.684  0.00  0.00            
ATOM   1333  HG2 MET X 302      37.971  27.040  41.228  0.00  0.00            
ATOM   1334  SD  MET X 302      39.075  29.213  41.377  0.00  0.00            
ATOM   1335  CE  MET X 302      39.702  29.563  43.113  0.00  0.00            
ATOM   1336  HE1 MET X 302      40.804  29.472  43.217  0.00  0.00            
ATOM   1337  HE2 MET X 302      39.467  30.634  43.292  0.00  0.00            
ATOM   1338  HE3 MET X 302      39.258  28.887  43.874  0.00  0.00            
ATOM   1339  C   MET X 302      39.061  24.456  41.211  0.00  0.00            
ATOM   1340  O   MET X 302      38.748  24.178  40.073  0.00  0.00            
ATOM   1341  N   VAL X 303      38.272  24.081  42.148  0.00  0.00            
ATOM   1342  HN  VAL X 303      38.609  24.330  43.053  0.00  0.00            
ATOM   1343  CA  VAL X 303      36.965  23.422  41.859  0.00  0.00            
ATOM   1344  HA  VAL X 303      36.796  23.138  40.831  0.00  0.00            
ATOM   1345  CB  VAL X 303      36.794  22.216  42.781  0.00  0.00            
ATOM   1346  HB  VAL X 303      36.735  22.507  43.851  0.00  0.00            
ATOM   1347  CG1 VAL X 303      35.474  21.410  42.638  0.00  0.00            
ATOM   1348 HG11 VAL X 303      35.473  20.525  43.309  0.00  0.00            
ATOM   1349 HG12 VAL X 303      34.566  21.927  43.015  0.00  0.00            
ATOM   1350 HG13 VAL X 303      35.421  21.077  41.580  0.00  0.00            
ATOM   1351  CG2 VAL X 303      37.953  21.284  42.714  0.00  0.00            
ATOM   1352 HG21 VAL X 303      38.913  21.814  42.893  0.00  0.00            
ATOM   1353 HG22 VAL X 303      38.007  20.766  41.732  0.00  0.00            
ATOM   1354 HG23 VAL X 303      37.927  20.591  43.582  0.00  0.00            
ATOM   1355  C   VAL X 303      35.840  24.427  42.046  0.00  0.00            
ATOM   1356  O   VAL X 303      35.802  25.116  43.045  0.00  0.00            
ATOM   1357  N   ASP X 304      34.835  24.443  41.157  0.00  0.00            
ATOM   1358  HN  ASP X 304      34.875  23.857  40.352  0.00  0.00            
ATOM   1359  CA  ASP X 304      33.578  25.140  41.398  0.00  0.00            
ATOM   1360  HA  ASP X 304      33.704  26.138  41.791  0.00  0.00            
ATOM   1361  CB  ASP X 304      32.899  25.397  39.975  0.00  0.00            
ATOM   1362  HB1 ASP X 304      32.867  24.410  39.465  0.00  0.00            
ATOM   1363  HB2 ASP X 304      33.577  26.054  39.390  0.00  0.00            
ATOM   1364  CG  ASP X 304      31.639  26.086  40.046  0.00  0.00            
ATOM   1365  OD1 ASP X 304      31.351  26.822  39.072  0.00  0.00            
ATOM   1366  OD2 ASP X 304      30.807  25.996  40.979  0.00  0.00            
ATOM   1367  C   ASP X 304      32.736  24.190  42.285  0.00  0.00            
ATOM   1368  O   ASP X 304      32.259  23.139  41.845  0.00  0.00            
ATOM   1369  N   GLY X 305      32.497  24.585  43.554  0.00  0.00            
ATOM   1370  HN  GLY X 305      32.780  25.417  44.025  0.00  0.00            
ATOM   1371  CA  GLY X 305      31.906  23.684  44.544  0.00  0.00            
ATOM   1372  HA1 GLY X 305      32.056  24.076  45.539  0.00  0.00            
ATOM   1373  HA2 GLY X 305      32.325  22.695  44.430  0.00  0.00            
ATOM   1374  C   GLY X 305      30.374  23.529  44.473  0.00  0.00            
ATOM   1375  O   GLY X 305      29.805  22.747  45.300  0.00  0.00            
ATOM   1376  N   THR X 306      29.810  24.319  43.655  0.00  0.00            
ATOM   1377  HN  THR X 306      30.348  25.025  43.203  0.00  0.00            
ATOM   1378  CA  THR X 306      28.397  24.214  43.291  0.00  0.00            
ATOM   1379  HA  THR X 306      27.890  23.880  44.184  0.00  0.00            
ATOM   1380  CB  THR X 306      27.738  25.542  42.820  0.00  0.00            
ATOM   1381  HB  THR X 306      26.634  25.415  42.841  0.00  0.00            
ATOM   1382  OG1 THR X 306      28.167  26.062  41.570  0.00  0.00            
ATOM   1383  HG1 THR X 306      29.119  26.161  41.496  0.00  0.00            
ATOM   1384  CG2 THR X 306      28.182  26.639  43.830  0.00  0.00            
ATOM   1385 HG21 THR X 306      28.036  26.316  44.883  0.00  0.00            
ATOM   1386 HG22 THR X 306      27.694  27.579  43.496  0.00  0.00            
ATOM   1387 HG23 THR X 306      29.293  26.648  43.826  0.00  0.00            
ATOM   1388  C   THR X 306      28.143  23.246  42.149  0.00  0.00            
ATOM   1389  O   THR X 306      27.050  22.701  42.009  0.00  0.00            
ATOM   1390  N   THR X 307      29.188  22.849  41.258  0.00  0.00            
ATOM   1391  HN  THR X 307      29.947  23.474  41.090  0.00  0.00            
ATOM   1392  CA  THR X 307      29.122  21.626  40.455  0.00  0.00            
ATOM   1393  HA  THR X 307      28.267  21.811  39.820  0.00  0.00            
ATOM   1394  CB  THR X 307      30.414  21.486  39.521  0.00  0.00            
ATOM   1395  HB  THR X 307      30.390  20.585  38.871  0.00  0.00            
ATOM   1396  OG1 THR X 307      31.653  21.328  40.107  0.00  0.00            
ATOM   1397  HG1 THR X 307      31.836  22.033  40.732  0.00  0.00            
ATOM   1398  CG2 THR X 307      30.497  22.719  38.629  0.00  0.00            
ATOM   1399 HG21 THR X 307      29.585  22.675  37.994  0.00  0.00            
ATOM   1400 HG22 THR X 307      31.424  22.667  38.018  0.00  0.00            
ATOM   1401 HG23 THR X 307      30.440  23.648  39.234  0.00  0.00            
ATOM   1402  C   THR X 307      28.931  20.289  41.169  0.00  0.00            
ATOM   1403  O   THR X 307      28.197  19.435  40.814  0.00  0.00            
ATOM   1404  N   THR X 308      29.616  20.081  42.248  0.00  0.00            
ATOM   1405  HN  THR X 308      30.339  20.742  42.435  0.00  0.00            
ATOM   1406  CA  THR X 308      29.705  18.827  42.964  0.00  0.00            
ATOM   1407  HA  THR X 308      28.722  18.379  42.966  0.00  0.00            
ATOM   1408  CB  THR X 308      30.818  17.891  42.412  0.00  0.00            
ATOM   1409  HB  THR X 308      30.504  17.822  41.348  0.00  0.00            
ATOM   1410  OG1 THR X 308      30.742  16.610  43.036  0.00  0.00            
ATOM   1411  HG1 THR X 308      31.450  16.098  42.638  0.00  0.00            
ATOM   1412  CG2 THR X 308      32.229  18.413  42.402  0.00  0.00            
ATOM   1413 HG21 THR X 308      32.224  19.458  42.024  0.00  0.00            
ATOM   1414 HG22 THR X 308      32.946  17.849  41.768  0.00  0.00            
ATOM   1415 HG23 THR X 308      32.633  18.401  43.437  0.00  0.00            
ATOM   1416  C   THR X 308      29.967  19.038  44.448  0.00  0.00            
ATOM   1417  O   THR X 308      30.589  20.053  44.828  0.00  0.00            
ATOM   1418  N   ASP X 309      29.553  18.090  45.363  0.00  0.00            
ATOM   1419  HN  ASP X 309      29.094  17.285  44.993  0.00  0.00            
ATOM   1420  CA  ASP X 309      29.869  18.200  46.796  0.00  0.00            
ATOM   1421  HA  ASP X 309      30.081  19.225  47.064  0.00  0.00            
ATOM   1422  CB  ASP X 309      28.713  17.632  47.609  0.00  0.00            
ATOM   1423  HB1 ASP X 309      28.899  17.726  48.701  0.00  0.00            
ATOM   1424  HB2 ASP X 309      28.585  16.543  47.427  0.00  0.00            
ATOM   1425  CG  ASP X 309      27.444  18.432  47.264  0.00  0.00            
ATOM   1426  OD1 ASP X 309      26.575  17.936  46.578  0.00  0.00            
ATOM   1427  OD2 ASP X 309      27.374  19.559  47.876  0.00  0.00            
ATOM   1428  C   ASP X 309      31.123  17.426  47.221  0.00  0.00            
ATOM   1429  O   ASP X 309      31.499  17.406  48.374  0.00  0.00            
ATOM   1430  N   ALA X 310      31.747  16.776  46.220  0.00  0.00            
ATOM   1431  HN  ALA X 310      31.173  16.482  45.460  0.00  0.00            
ATOM   1432  CA  ALA X 310      32.953  16.031  46.316  0.00  0.00            
ATOM   1433  HA  ALA X 310      32.887  15.262  47.071  0.00  0.00            
ATOM   1434  CB  ALA X 310      33.378  15.322  45.032  0.00  0.00            
ATOM   1435  HB1 ALA X 310      34.294  14.719  45.209  0.00  0.00            
ATOM   1436  HB2 ALA X 310      33.553  16.005  44.173  0.00  0.00            
ATOM   1437  HB3 ALA X 310      32.643  14.554  44.709  0.00  0.00            
ATOM   1438  C   ALA X 310      34.227  16.932  46.723  0.00  0.00            
ATOM   1439  O   ALA X 310      34.330  18.106  46.499  0.00  0.00            
ATOM   1440  N   VAL X 311      35.166  16.275  47.430  0.00  0.00            
ATOM   1441  HN  VAL X 311      35.120  15.301  47.638  0.00  0.00            
ATOM   1442  CA  VAL X 311      36.340  16.924  48.056  0.00  0.00            
ATOM   1443  HA  VAL X 311      36.378  17.935  47.677  0.00  0.00            
ATOM   1444  CB  VAL X 311      36.173  17.017  49.539  0.00  0.00            
ATOM   1445  HB  VAL X 311      36.976  17.712  49.866  0.00  0.00            
ATOM   1446  CG1 VAL X 311      34.793  17.589  50.043  0.00  0.00            
ATOM   1447 HG11 VAL X 311      34.504  18.587  49.649  0.00  0.00            
ATOM   1448 HG12 VAL X 311      34.022  16.859  49.716  0.00  0.00            
ATOM   1449 HG13 VAL X 311      34.910  17.789  51.129  0.00  0.00            
ATOM   1450  CG2 VAL X 311      36.302  15.667  50.199  0.00  0.00            
ATOM   1451 HG21 VAL X 311      35.913  15.680  51.240  0.00  0.00            
ATOM   1452 HG22 VAL X 311      37.326  15.236  50.193  0.00  0.00            
ATOM   1453 HG23 VAL X 311      35.640  14.947  49.671  0.00  0.00            
ATOM   1454  C   VAL X 311      37.642  16.276  47.782  0.00  0.00            
ATOM   1455  O   VAL X 311      38.615  16.949  47.962  0.00  0.00            
ATOM   1456  N   ASP X 312      37.779  14.994  47.437  0.00  0.00            
ATOM   1457  HN  ASP X 312      37.016  14.450  47.096  0.00  0.00            
ATOM   1458  CA  ASP X 312      39.075  14.346  47.368  0.00  0.00            
ATOM   1459  HA  ASP X 312      39.688  14.712  48.179  0.00  0.00            
ATOM   1460  CB  ASP X 312      38.893  12.772  47.614  0.00  0.00            
ATOM   1461  HB1 ASP X 312      38.294  12.259  46.831  0.00  0.00            
ATOM   1462  HB2 ASP X 312      38.423  12.647  48.613  0.00  0.00            
ATOM   1463  CG  ASP X 312      40.189  11.991  47.685  0.00  0.00            
ATOM   1464  OD1 ASP X 312      41.012  12.026  46.726  0.00  0.00            
ATOM   1465  OD2 ASP X 312      40.345  11.242  48.669  0.00  0.00            
ATOM   1466  C   ASP X 312      39.661  14.668  46.007  0.00  0.00            
ATOM   1467  O   ASP X 312      38.964  14.457  45.049  0.00  0.00            
ATOM   1468  N   PRO X 313      40.870  15.134  45.737  0.00  0.00            
ATOM   1469  CD  PRO X 313      41.759  15.591  46.754  0.00  0.00            
ATOM   1470  HD1 PRO X 313      41.316  16.593  46.937  0.00  0.00            
ATOM   1471  HD2 PRO X 313      41.826  14.923  47.640  0.00  0.00            
ATOM   1472  CA  PRO X 313      41.263  15.402  44.360  0.00  0.00            
ATOM   1473  HA  PRO X 313      40.486  16.007  43.916  0.00  0.00            
ATOM   1474  CB  PRO X 313      42.668  16.003  44.540  0.00  0.00            
ATOM   1475  HB1 PRO X 313      42.428  17.072  44.355  0.00  0.00            
ATOM   1476  HB2 PRO X 313      43.478  15.682  43.850  0.00  0.00            
ATOM   1477  CG  PRO X 313      43.072  15.716  45.923  0.00  0.00            
ATOM   1478  HG1 PRO X 313      43.818  16.441  46.314  0.00  0.00            
ATOM   1479  HG2 PRO X 313      43.555  14.720  45.835  0.00  0.00            
ATOM   1480  C   PRO X 313      41.361  14.200  43.391  0.00  0.00            
ATOM   1481  O   PRO X 313      41.235  14.318  42.149  0.00  0.00            
ATOM   1482  N   ALA X 314      41.466  12.970  43.986  0.00  0.00            
ATOM   1483  HN  ALA X 314      41.533  12.802  44.966  0.00  0.00            
ATOM   1484  CA  ALA X 314      41.522  11.796  43.154  0.00  0.00            
ATOM   1485  HA  ALA X 314      41.888  12.121  42.192  0.00  0.00            
ATOM   1486  CB  ALA X 314      42.390  10.725  43.921  0.00  0.00            
ATOM   1487  HB1 ALA X 314      43.305  11.299  44.180  0.00  0.00            
ATOM   1488  HB2 ALA X 314      42.405   9.802  43.303  0.00  0.00            
ATOM   1489  HB3 ALA X 314      41.955  10.502  44.918  0.00  0.00            
ATOM   1490  C   ALA X 314      40.206  11.131  42.896  0.00  0.00            
ATOM   1491  O   ALA X 314      40.100  10.174  42.202  0.00  0.00            
ATOM   1492  N   GLU X 315      39.053  11.789  43.402  0.00  0.00            
ATOM   1493  HN  GLU X 315      39.050  12.635  43.929  0.00  0.00            
ATOM   1494  CA  GLU X 315      37.762  11.397  43.066  0.00  0.00            
ATOM   1495  HA  GLU X 315      37.757  10.479  42.497  0.00  0.00            
ATOM   1496  CB  GLU X 315      36.925  11.237  44.369  0.00  0.00            
ATOM   1497  HB1 GLU X 315      37.631  10.849  45.134  0.00  0.00            
ATOM   1498  HB2 GLU X 315      36.216  10.383  44.322  0.00  0.00            
ATOM   1499  CG  GLU X 315      36.122  12.437  44.855  0.00  0.00            
ATOM   1500  HG1 GLU X 315      35.429  12.717  44.032  0.00  0.00            
ATOM   1501  HG2 GLU X 315      36.824  13.278  45.038  0.00  0.00            
ATOM   1502  CD  GLU X 315      35.317  12.230  46.144  0.00  0.00            
ATOM   1503  OE1 GLU X 315      35.384  13.084  47.069  0.00  0.00            
ATOM   1504  OE2 GLU X 315      34.596  11.192  46.208  0.00  0.00            
ATOM   1505  C   GLU X 315      37.248  12.415  42.037  0.00  0.00            
ATOM   1506  O   GLU X 315      36.525  12.062  41.102  0.00  0.00            
ATOM   1507  N   ILE X 316      37.683  13.720  42.184  0.00  0.00            
ATOM   1508  HN  ILE X 316      38.126  14.015  43.027  0.00  0.00            
ATOM   1509  CA  ILE X 316      37.129  14.759  41.281  0.00  0.00            
ATOM   1510  HA  ILE X 316      36.070  14.681  41.080  0.00  0.00            
ATOM   1511  CB  ILE X 316      37.430  16.174  41.867  0.00  0.00            
ATOM   1512  HB  ILE X 316      38.534  16.178  41.993  0.00  0.00            
ATOM   1513  CG2 ILE X 316      36.862  17.309  41.011  0.00  0.00            
ATOM   1514 HG21 ILE X 316      37.283  17.384  39.986  0.00  0.00            
ATOM   1515 HG22 ILE X 316      37.156  18.270  41.485  0.00  0.00            
ATOM   1516 HG23 ILE X 316      35.752  17.266  41.001  0.00  0.00            
ATOM   1517  CG1 ILE X 316      36.772  16.454  43.240  0.00  0.00            
ATOM   1518 HG11 ILE X 316      36.819  15.523  43.845  0.00  0.00            
ATOM   1519 HG12 ILE X 316      35.686  16.598  43.056  0.00  0.00            
ATOM   1520  CD  ILE X 316      37.366  17.692  44.035  0.00  0.00            
ATOM   1521  HD1 ILE X 316      37.196  18.649  43.496  0.00  0.00            
ATOM   1522  HD2 ILE X 316      38.464  17.524  44.040  0.00  0.00            
ATOM   1523  HD3 ILE X 316      37.051  17.948  45.070  0.00  0.00            
ATOM   1524  C   ILE X 316      37.725  14.719  39.883  0.00  0.00            
ATOM   1525  O   ILE X 316      37.026  15.002  38.940  0.00  0.00            
ATOM   1526  N   TRP X 317      39.007  14.447  39.803  0.00  0.00            
ATOM   1527  HN  TRP X 317      39.407  14.176  40.675  0.00  0.00            
ATOM   1528  CA  TRP X 317      39.722  14.244  38.538  0.00  0.00            
ATOM   1529  HA  TRP X 317      39.133  13.747  37.781  0.00  0.00            
ATOM   1530  CB  TRP X 317      39.973  15.640  37.787  0.00  0.00            
ATOM   1531  HB1 TRP X 317      40.880  16.136  38.193  0.00  0.00            
ATOM   1532  HB2 TRP X 317      39.112  16.308  38.002  0.00  0.00            
ATOM   1533  CG  TRP X 317      40.344  15.609  36.338  0.00  0.00            
ATOM   1534  CD1 TRP X 317      40.797  14.554  35.596  0.00  0.00            
ATOM   1535  HD1 TRP X 317      40.666  13.505  35.814  0.00  0.00            
ATOM   1536  NE1 TRP X 317      41.487  14.936  34.477  0.00  0.00            
ATOM   1537  HE1 TRP X 317      41.938  14.336  33.852  0.00  0.00            
ATOM   1538  CE2 TRP X 317      41.518  16.341  34.479  0.00  0.00            
ATOM   1539  CD2 TRP X 317      40.727  16.778  35.617  0.00  0.00            
ATOM   1540  CE3 TRP X 317      40.663  18.110  35.894  0.00  0.00            
ATOM   1541  HE3 TRP X 317      40.209  18.370  36.839  0.00  0.00            
ATOM   1542  CZ3 TRP X 317      41.304  19.069  35.063  0.00  0.00            
ATOM   1543  HZ3 TRP X 317      41.308  20.087  35.422  0.00  0.00            
ATOM   1544  CZ2 TRP X 317      42.183  17.244  33.687  0.00  0.00            
ATOM   1545  HZ2 TRP X 317      42.870  16.879  32.937  0.00  0.00            
ATOM   1546  CH2 TRP X 317      42.032  18.624  33.909  0.00  0.00            
ATOM   1547  HH2 TRP X 317      42.569  19.249  33.211  0.00  0.00            
ATOM   1548  C   TRP X 317      41.128  13.759  38.692  0.00  0.00            
ATOM   1549  O   TRP X 317      42.076  14.508  38.924  0.00  0.00            
ATOM   1550  N   PRO X 318      41.249  12.436  38.683  0.00  0.00            
ATOM   1551  CD  PRO X 318      40.178  11.413  38.535  0.00  0.00            
ATOM   1552  HD1 PRO X 318      39.501  11.725  39.359  0.00  0.00            
ATOM   1553  HD2 PRO X 318      39.710  11.596  37.544  0.00  0.00            
ATOM   1554  CA  PRO X 318      42.470  11.854  39.139  0.00  0.00            
ATOM   1555  HA  PRO X 318      42.911  12.385  39.970  0.00  0.00            
ATOM   1556  CB  PRO X 318      42.127  10.437  39.407  0.00  0.00            
ATOM   1557  HB1 PRO X 318      41.970  10.285  40.496  0.00  0.00            
ATOM   1558  HB2 PRO X 318      42.939   9.719  39.163  0.00  0.00            
ATOM   1559  CG  PRO X 318      40.843  10.109  38.594  0.00  0.00            
ATOM   1560  HG1 PRO X 318      40.190   9.345  39.068  0.00  0.00            
ATOM   1561  HG2 PRO X 318      41.145   9.856  37.555  0.00  0.00            
ATOM   1562  C   PRO X 318      43.630  11.961  38.160  0.00  0.00            
ATOM   1563  O   PRO X 318      44.777  11.698  38.527  0.00  0.00            
ATOM   1564  N   GLU X 319      43.353  12.278  36.870  0.00  0.00            
ATOM   1565  HN  GLU X 319      42.391  12.450  36.669  0.00  0.00            
ATOM   1566  CA  GLU X 319      44.350  12.306  35.822  0.00  0.00            
ATOM   1567  HA  GLU X 319      45.137  11.578  35.949  0.00  0.00            
ATOM   1568  CB  GLU X 319      43.485  12.048  34.617  0.00  0.00            
ATOM   1569  HB1 GLU X 319      44.059  12.109  33.667  0.00  0.00            
ATOM   1570  HB2 GLU X 319      42.596  12.700  34.481  0.00  0.00            
ATOM   1571  CG  GLU X 319      42.784  10.648  34.712  0.00  0.00            
ATOM   1572  HG1 GLU X 319      41.962  10.620  35.460  0.00  0.00            
ATOM   1573  HG2 GLU X 319      43.498   9.815  34.886  0.00  0.00            
ATOM   1574  CD  GLU X 319      42.098  10.286  33.413  0.00  0.00            
ATOM   1575  OE1 GLU X 319      42.040  11.196  32.523  0.00  0.00            
ATOM   1576  OE2 GLU X 319      41.545   9.129  33.262  0.00  0.00            
ATOM   1577  C   GLU X 319      45.004  13.656  35.811  0.00  0.00            
ATOM   1578  O   GLU X 319      46.113  13.909  35.301  0.00  0.00            
ATOM   1579  N   PHE X 320      44.399  14.695  36.348  0.00  0.00            
ATOM   1580  HN  PHE X 320      43.450  14.636  36.648  0.00  0.00            
ATOM   1581  CA  PHE X 320      45.110  15.949  36.738  0.00  0.00            
ATOM   1582  HA  PHE X 320      45.471  16.350  35.803  0.00  0.00            
ATOM   1583  CB  PHE X 320      44.116  16.939  37.416  0.00  0.00            
ATOM   1584  HB1 PHE X 320      43.760  16.524  38.383  0.00  0.00            
ATOM   1585  HB2 PHE X 320      43.225  17.114  36.775  0.00  0.00            
ATOM   1586  CG  PHE X 320      44.708  18.312  37.679  0.00  0.00            
ATOM   1587  CD1 PHE X 320      44.983  18.735  38.959  0.00  0.00            
ATOM   1588  HD1 PHE X 320      44.821  18.032  39.762  0.00  0.00            
ATOM   1589  CE1 PHE X 320      45.424  20.076  39.130  0.00  0.00            
ATOM   1590  HE1 PHE X 320      45.714  20.482  40.088  0.00  0.00            
ATOM   1591  CZ  PHE X 320      45.600  20.928  38.047  0.00  0.00            
ATOM   1592  HZ  PHE X 320      46.089  21.887  38.132  0.00  0.00            
ATOM   1593  CD2 PHE X 320      44.843  19.198  36.615  0.00  0.00            
ATOM   1594  HD2 PHE X 320      44.415  18.855  35.685  0.00  0.00            
ATOM   1595  CE2 PHE X 320      45.299  20.485  36.795  0.00  0.00            
ATOM   1596  HE2 PHE X 320      45.318  21.079  35.893  0.00  0.00            
ATOM   1597  C   PHE X 320      46.244  15.628  37.652  0.00  0.00            
ATOM   1598  O   PHE X 320      47.373  16.036  37.405  0.00  0.00            
ATOM   1599  N   ILE X 321      46.004  14.805  38.641  0.00  0.00            
ATOM   1600  HN  ILE X 321      45.074  14.446  38.674  0.00  0.00            
ATOM   1601  CA  ILE X 321      46.986  14.379  39.645  0.00  0.00            
ATOM   1602  HA  ILE X 321      47.461  15.273  40.019  0.00  0.00            
ATOM   1603  CB  ILE X 321      46.346  13.773  40.862  0.00  0.00            
ATOM   1604  HB  ILE X 321      45.749  12.903  40.513  0.00  0.00            
ATOM   1605  CG2 ILE X 321      47.270  13.272  41.966  0.00  0.00            
ATOM   1606 HG21 ILE X 321      47.742  14.122  42.505  0.00  0.00            
ATOM   1607 HG22 ILE X 321      48.038  12.588  41.544  0.00  0.00            
ATOM   1608 HG23 ILE X 321      46.645  12.803  42.755  0.00  0.00            
ATOM   1609  CG1 ILE X 321      45.253  14.675  41.446  0.00  0.00            
ATOM   1610 HG11 ILE X 321      44.633  14.016  42.091  0.00  0.00            
ATOM   1611 HG12 ILE X 321      44.519  15.000  40.678  0.00  0.00            
ATOM   1612  CD  ILE X 321      45.841  15.931  42.134  0.00  0.00            
ATOM   1613  HD1 ILE X 321      44.995  16.622  42.338  0.00  0.00            
ATOM   1614  HD2 ILE X 321      46.697  16.404  41.607  0.00  0.00            
ATOM   1615  HD3 ILE X 321      46.283  15.718  43.131  0.00  0.00            
ATOM   1616  C   ILE X 321      48.054  13.430  39.168  0.00  0.00            
ATOM   1617  O   ILE X 321      49.224  13.580  39.529  0.00  0.00            
ATOM   1618  N   ALA X 322      47.729  12.493  38.297  0.00  0.00            
ATOM   1619  HN  ALA X 322      46.746  12.355  38.206  0.00  0.00            
ATOM   1620  CA  ALA X 322      48.650  11.710  37.566  0.00  0.00            
ATOM   1621  HA  ALA X 322      49.241  11.225  38.329  0.00  0.00            
ATOM   1622  CB  ALA X 322      47.892  10.600  36.783  0.00  0.00            
ATOM   1623  HB1 ALA X 322      47.546   9.803  37.475  0.00  0.00            
ATOM   1624  HB2 ALA X 322      48.510  10.093  36.011  0.00  0.00            
ATOM   1625  HB3 ALA X 322      47.040  11.005  36.195  0.00  0.00            
ATOM   1626  C   ALA X 322      49.633  12.543  36.713  0.00  0.00            
ATOM   1627  O   ALA X 322      50.798  12.356  36.637  0.00  0.00            
ATOM   1628  N   ARG X 323      49.053  13.485  35.991  0.00  0.00            
ATOM   1629  HN  ARG X 323      48.068  13.633  36.040  0.00  0.00            
ATOM   1630  CA  ARG X 323      49.802  14.354  35.066  0.00  0.00            
ATOM   1631  HA  ARG X 323      50.392  13.748  34.395  0.00  0.00            
ATOM   1632  CB  ARG X 323      48.823  14.915  33.998  0.00  0.00            
ATOM   1633  HB1 ARG X 323      47.950  15.360  34.521  0.00  0.00            
ATOM   1634  HB2 ARG X 323      48.437  14.081  33.374  0.00  0.00            
ATOM   1635  CG  ARG X 323      49.501  15.822  32.911  0.00  0.00            
ATOM   1636  HG1 ARG X 323      50.219  15.052  32.558  0.00  0.00            
ATOM   1637  HG2 ARG X 323      50.060  16.655  33.388  0.00  0.00            
ATOM   1638  CD  ARG X 323      48.650  16.337  31.804  0.00  0.00            
ATOM   1639  HD1 ARG X 323      47.918  17.068  32.210  0.00  0.00            
ATOM   1640  HD2 ARG X 323      48.128  15.528  31.249  0.00  0.00            
ATOM   1641  NE  ARG X 323      49.551  17.032  30.828  0.00  0.00            
ATOM   1642  HE  ARG X 323      50.545  17.015  30.939  0.00  0.00            
ATOM   1643  CZ  ARG X 323      49.046  17.605  29.747  0.00  0.00            
ATOM   1644  NH1 ARG X 323      47.750  17.724  29.476  0.00  0.00            
ATOM   1645 HH11 ARG X 323      47.154  17.325  30.173  0.00  0.00            
ATOM   1646 HH12 ARG X 323      47.472  18.335  28.735  0.00  0.00            
ATOM   1647  NH2 ARG X 323      49.891  18.005  28.822  0.00  0.00            
ATOM   1648 HH21 ARG X 323      50.844  18.215  29.042  0.00  0.00            
ATOM   1649 HH22 ARG X 323      49.486  18.439  28.017  0.00  0.00            
ATOM   1650  C   ARG X 323      50.684  15.439  35.705  0.00  0.00            
ATOM   1651  O   ARG X 323      51.720  15.790  35.205  0.00  0.00            
ATOM   1652  N   LEU X 324      50.342  15.942  36.930  0.00  0.00            
ATOM   1653  HN  LEU X 324      49.527  15.588  37.383  0.00  0.00            
ATOM   1654  CA  LEU X 324      51.305  16.743  37.706  0.00  0.00            
ATOM   1655  HA  LEU X 324      51.571  17.558  37.049  0.00  0.00            
ATOM   1656  CB  LEU X 324      50.676  17.191  39.045  0.00  0.00            
ATOM   1657  HB1 LEU X 324      51.496  17.595  39.677  0.00  0.00            
ATOM   1658  HB2 LEU X 324      50.265  16.313  39.589  0.00  0.00            
ATOM   1659  CG  LEU X 324      49.479  18.121  39.063  0.00  0.00            
ATOM   1660  HG  LEU X 324      48.740  17.766  38.314  0.00  0.00            
ATOM   1661  CD1 LEU X 324      48.762  18.141  40.415  0.00  0.00            
ATOM   1662 HD11 LEU X 324      49.453  18.634  41.131  0.00  0.00            
ATOM   1663 HD12 LEU X 324      48.576  17.147  40.877  0.00  0.00            
ATOM   1664 HD13 LEU X 324      47.796  18.682  40.318  0.00  0.00            
ATOM   1665  CD2 LEU X 324      49.793  19.543  38.545  0.00  0.00            
ATOM   1666 HD21 LEU X 324      50.468  20.090  39.238  0.00  0.00            
ATOM   1667 HD22 LEU X 324      50.287  19.535  37.550  0.00  0.00            
ATOM   1668 HD23 LEU X 324      48.915  20.200  38.367  0.00  0.00            
ATOM   1669  C   LEU X 324      52.611  15.987  38.123  0.00  0.00            
ATOM   1670  O   LEU X 324      52.532  14.765  38.400  0.00  0.00            
ATOM   1671  N   PRO X 325      53.737  16.678  38.197  0.00  0.00            
ATOM   1672  CD  PRO X 325      54.041  17.884  37.409  0.00  0.00            
ATOM   1673  HD1 PRO X 325      53.533  17.878  36.421  0.00  0.00            
ATOM   1674  HD2 PRO X 325      53.476  18.679  37.941  0.00  0.00            
ATOM   1675  CA  PRO X 325      54.912  16.220  38.949  0.00  0.00            
ATOM   1676  HA  PRO X 325      55.174  15.296  38.456  0.00  0.00            
ATOM   1677  CB  PRO X 325      55.947  17.428  38.826  0.00  0.00            
ATOM   1678  HB1 PRO X 325      56.977  17.020  38.752  0.00  0.00            
ATOM   1679  HB2 PRO X 325      55.725  18.197  39.597  0.00  0.00            
ATOM   1680  CG  PRO X 325      55.577  18.097  37.494  0.00  0.00            
ATOM   1681  HG1 PRO X 325      56.136  17.631  36.655  0.00  0.00            
ATOM   1682  HG2 PRO X 325      55.999  19.124  37.470  0.00  0.00            
ATOM   1683  C   PRO X 325      54.599  15.776  40.466  0.00  0.00            
ATOM   1684  O   PRO X 325      53.796  16.475  41.167  0.00  0.00            
ATOM   1685  N   ALA X 326      55.281  14.724  40.953  0.00  0.00            
ATOM   1686  HN  ALA X 326      55.988  14.264  40.422  0.00  0.00            
ATOM   1687  CA  ALA X 326      54.924  14.153  42.247  0.00  0.00            
ATOM   1688  HA  ALA X 326      53.871  14.358  42.373  0.00  0.00            
ATOM   1689  CB  ALA X 326      55.194  12.674  42.292  0.00  0.00            
ATOM   1690  HB1 ALA X 326      56.046  12.362  41.651  0.00  0.00            
ATOM   1691  HB2 ALA X 326      54.309  12.153  41.869  0.00  0.00            
ATOM   1692  HB3 ALA X 326      55.318  12.304  43.333  0.00  0.00            
ATOM   1693  C   ALA X 326      55.538  14.880  43.431  0.00  0.00            
ATOM   1694  O   ALA X 326      55.028  14.710  44.561  0.00  0.00            
ATOM   1695  N   LYS X 327      56.624  15.745  43.291  0.00  0.00            
ATOM   1696  HN  LYS X 327      57.154  15.802  42.449  0.00  0.00            
ATOM   1697  CA  LYS X 327      57.161  16.476  44.509  0.00  0.00            
ATOM   1698  HA  LYS X 327      56.683  16.197  45.436  0.00  0.00            
ATOM   1699  CB  LYS X 327      58.713  16.154  44.598  0.00  0.00            
ATOM   1700  HB1 LYS X 327      59.202  16.595  45.492  0.00  0.00            
ATOM   1701  HB2 LYS X 327      59.269  16.615  43.754  0.00  0.00            
ATOM   1702  CG  LYS X 327      58.941  14.674  44.608  0.00  0.00            
ATOM   1703  HG1 LYS X 327      58.353  14.202  43.792  0.00  0.00            
ATOM   1704  HG2 LYS X 327      58.620  14.203  45.562  0.00  0.00            
ATOM   1705  CD  LYS X 327      60.324  14.156  44.464  0.00  0.00            
ATOM   1706  HD1 LYS X 327      61.033  14.812  45.013  0.00  0.00            
ATOM   1707  HD2 LYS X 327      60.543  14.139  43.375  0.00  0.00            
ATOM   1708  CE  LYS X 327      60.529  12.688  44.845  0.00  0.00            
ATOM   1709  HE1 LYS X 327      60.482  12.568  45.948  0.00  0.00            
ATOM   1710  HE2 LYS X 327      61.560  12.351  44.604  0.00  0.00            
ATOM   1711  NZ  LYS X 327      59.631  11.723  44.128  0.00  0.00            
ATOM   1712  HZ1 LYS X 327      59.976  10.751  43.996  0.00  0.00            
ATOM   1713  HZ2 LYS X 327      59.533  12.089  43.159  0.00  0.00            
ATOM   1714  HZ3 LYS X 327      58.728  11.770  44.642  0.00  0.00            
ATOM   1715  C   LYS X 327      56.849  17.972  44.463  0.00  0.00            
ATOM   1716  O   LYS X 327      57.345  18.784  45.210  0.00  0.00            
ATOM   1717  N   LEU X 328      55.899  18.341  43.540  0.00  0.00            
ATOM   1718  HN  LEU X 328      55.576  17.711  42.838  0.00  0.00            
ATOM   1719  CA  LEU X 328      55.216  19.649  43.413  0.00  0.00            
ATOM   1720  HA  LEU X 328      55.885  20.497  43.409  0.00  0.00            
ATOM   1721  CB  LEU X 328      54.599  19.731  42.005  0.00  0.00            
ATOM   1722  HB1 LEU X 328      53.958  18.838  41.849  0.00  0.00            
ATOM   1723  HB2 LEU X 328      55.431  19.673  41.270  0.00  0.00            
ATOM   1724  CG  LEU X 328      53.879  20.986  41.519  0.00  0.00            
ATOM   1725  HG  LEU X 328      52.960  21.165  42.117  0.00  0.00            
ATOM   1726  CD1 LEU X 328      54.674  22.207  41.807  0.00  0.00            
ATOM   1727 HD11 LEU X 328      54.337  23.015  41.123  0.00  0.00            
ATOM   1728 HD12 LEU X 328      55.775  22.092  41.723  0.00  0.00            
ATOM   1729 HD13 LEU X 328      54.350  22.481  42.834  0.00  0.00            
ATOM   1730  CD2 LEU X 328      53.568  21.017  40.037  0.00  0.00            
ATOM   1731 HD21 LEU X 328      52.997  20.120  39.717  0.00  0.00            
ATOM   1732 HD22 LEU X 328      53.092  21.999  39.824  0.00  0.00            
ATOM   1733 HD23 LEU X 328      54.542  20.960  39.505  0.00  0.00            
ATOM   1734  C   LEU X 328      54.173  19.760  44.475  0.00  0.00            
ATOM   1735  O   LEU X 328      53.253  18.912  44.465  0.00  0.00            
ATOM   1736  N   PRO X 329      54.155  20.730  45.340  0.00  0.00            
ATOM   1737  CD  PRO X 329      55.378  21.387  45.833  0.00  0.00            
ATOM   1738  HD1 PRO X 329      56.162  20.659  46.131  0.00  0.00            
ATOM   1739  HD2 PRO X 329      55.790  22.133  45.120  0.00  0.00            
ATOM   1740  CA  PRO X 329      52.990  21.020  46.123  0.00  0.00            
ATOM   1741  HA  PRO X 329      52.941  20.190  46.813  0.00  0.00            
ATOM   1742  CB  PRO X 329      53.402  22.226  46.902  0.00  0.00            
ATOM   1743  HB1 PRO X 329      53.100  22.048  47.956  0.00  0.00            
ATOM   1744  HB2 PRO X 329      52.993  23.200  46.557  0.00  0.00            
ATOM   1745  CG  PRO X 329      54.932  22.169  46.992  0.00  0.00            
ATOM   1746  HG1 PRO X 329      55.412  21.786  47.919  0.00  0.00            
ATOM   1747  HG2 PRO X 329      55.328  23.206  46.963  0.00  0.00            
ATOM   1748  C   PRO X 329      51.597  21.300  45.388  0.00  0.00            
ATOM   1749  O   PRO X 329      51.530  22.260  44.647  0.00  0.00            
ATOM   1750  N   ILE X 330      50.518  20.586  45.720  0.00  0.00            
ATOM   1751  HN  ILE X 330      50.550  19.884  46.427  0.00  0.00            
ATOM   1752  CA  ILE X 330      49.175  21.014  45.226  0.00  0.00            
ATOM   1753  HA  ILE X 330      49.228  21.886  44.590  0.00  0.00            
ATOM   1754  CB  ILE X 330      48.548  19.959  44.427  0.00  0.00            
ATOM   1755  HB  ILE X 330      49.064  19.981  43.444  0.00  0.00            
ATOM   1756  CG2 ILE X 330      48.727  18.548  45.040  0.00  0.00            
ATOM   1757 HG21 ILE X 330      49.778  18.300  45.302  0.00  0.00            
ATOM   1758 HG22 ILE X 330      48.325  17.794  44.331  0.00  0.00            
ATOM   1759 HG23 ILE X 330      48.079  18.411  45.932  0.00  0.00            
ATOM   1760  CG1 ILE X 330      47.059  20.418  43.957  0.00  0.00            
ATOM   1761 HG11 ILE X 330      47.038  21.489  43.661  0.00  0.00            
ATOM   1762 HG12 ILE X 330      46.446  20.407  44.884  0.00  0.00            
ATOM   1763  CD  ILE X 330      46.523  19.529  42.864  0.00  0.00            
ATOM   1764  HD1 ILE X 330      47.093  19.749  41.935  0.00  0.00            
ATOM   1765  HD2 ILE X 330      45.426  19.696  42.825  0.00  0.00            
ATOM   1766  HD3 ILE X 330      46.712  18.473  43.152  0.00  0.00            
ATOM   1767  C   ILE X 330      48.337  21.428  46.484  0.00  0.00            
ATOM   1768  O   ILE X 330      48.358  20.849  47.567  0.00  0.00            
ATOM   1769  N   THR X 331      47.548  22.525  46.339  0.00  0.00            
ATOM   1770  HN  THR X 331      47.555  23.112  45.533  0.00  0.00            
ATOM   1771  CA  THR X 331      46.444  22.944  47.286  0.00  0.00            
ATOM   1772  HA  THR X 331      46.346  22.330  48.169  0.00  0.00            
ATOM   1773  CB  THR X 331      46.486  24.298  47.944  0.00  0.00            
ATOM   1774  HB  THR X 331      46.320  25.112  47.207  0.00  0.00            
ATOM   1775  OG1 THR X 331      47.772  24.497  48.527  0.00  0.00            
ATOM   1776  HG1 THR X 331      47.699  24.641  49.474  0.00  0.00            
ATOM   1777  CG2 THR X 331      45.469  24.480  48.997  0.00  0.00            
ATOM   1778 HG21 THR X 331      45.607  25.430  49.557  0.00  0.00            
ATOM   1779 HG22 THR X 331      45.502  23.694  49.782  0.00  0.00            
ATOM   1780 HG23 THR X 331      44.418  24.346  48.665  0.00  0.00            
ATOM   1781  C   THR X 331      45.170  22.799  46.514  0.00  0.00            
ATOM   1782  O   THR X 331      45.011  23.272  45.398  0.00  0.00            
ATOM   1783  N   VAL X 332      44.185  22.010  47.085  0.00  0.00            
ATOM   1784  HN  VAL X 332      44.265  21.687  48.025  0.00  0.00            
ATOM   1785  CA  VAL X 332      42.812  21.724  46.499  0.00  0.00            
ATOM   1786  HA  VAL X 332      42.867  21.917  45.437  0.00  0.00            
ATOM   1787  CB  VAL X 332      42.372  20.346  46.879  0.00  0.00            
ATOM   1788  HB  VAL X 332      42.416  20.229  47.983  0.00  0.00            
ATOM   1789  CG1 VAL X 332      40.904  19.989  46.451  0.00  0.00            
ATOM   1790 HG11 VAL X 332      40.237  20.780  46.858  0.00  0.00            
ATOM   1791 HG12 VAL X 332      40.904  19.842  45.350  0.00  0.00            
ATOM   1792 HG13 VAL X 332      40.551  19.038  46.904  0.00  0.00            
ATOM   1793  CG2 VAL X 332      43.269  19.227  46.337  0.00  0.00            
ATOM   1794 HG21 VAL X 332      42.996  18.237  46.762  0.00  0.00            
ATOM   1795 HG22 VAL X 332      44.353  19.415  46.492  0.00  0.00            
ATOM   1796 HG23 VAL X 332      43.276  19.170  45.228  0.00  0.00            
ATOM   1797  C   VAL X 332      41.886  22.825  47.044  0.00  0.00            
ATOM   1798  O   VAL X 332      41.531  22.889  48.266  0.00  0.00            
ATOM   1799  N   VAL X 333      41.463  23.727  46.155  0.00  0.00            
ATOM   1800  HN  VAL X 333      41.797  23.812  45.219  0.00  0.00            
ATOM   1801  CA  VAL X 333      40.512  24.785  46.474  0.00  0.00            
ATOM   1802  HA  VAL X 333      40.432  24.723  47.549  0.00  0.00            
ATOM   1803  CB  VAL X 333      41.013  26.081  45.954  0.00  0.00            
ATOM   1804  HB  VAL X 333      41.106  26.065  44.847  0.00  0.00            
ATOM   1805  CG1 VAL X 333      40.022  27.329  46.183  0.00  0.00            
ATOM   1806 HG11 VAL X 333      39.835  27.271  47.277  0.00  0.00            
ATOM   1807 HG12 VAL X 333      40.556  28.257  45.884  0.00  0.00            
ATOM   1808 HG13 VAL X 333      39.103  27.212  45.570  0.00  0.00            
ATOM   1809  CG2 VAL X 333      42.405  26.325  46.425  0.00  0.00            
ATOM   1810 HG21 VAL X 333      42.718  27.317  46.035  0.00  0.00            
ATOM   1811 HG22 VAL X 333      43.178  25.591  46.114  0.00  0.00            
ATOM   1812 HG23 VAL X 333      42.392  26.395  47.534  0.00  0.00            
ATOM   1813  C   VAL X 333      39.110  24.483  45.947  0.00  0.00            
ATOM   1814  O   VAL X 333      38.865  24.511  44.734  0.00  0.00            
ATOM   1815  N   ARG X 334      38.178  24.281  46.892  0.00  0.00            
ATOM   1816  HN  ARG X 334      38.425  24.317  47.857  0.00  0.00            
ATOM   1817  CA  ARG X 334      36.731  24.455  46.409  0.00  0.00            
ATOM   1818  HA  ARG X 334      36.644  24.141  45.379  0.00  0.00            
ATOM   1819  CB  ARG X 334      35.775  23.685  47.377  0.00  0.00            
ATOM   1820  HB1 ARG X 334      34.745  24.061  47.201  0.00  0.00            
ATOM   1821  HB2 ARG X 334      36.039  23.922  48.430  0.00  0.00            
ATOM   1822  CG  ARG X 334      35.756  22.171  47.064  0.00  0.00            
ATOM   1823  HG1 ARG X 334      36.769  21.775  46.840  0.00  0.00            
ATOM   1824  HG2 ARG X 334      35.179  22.048  46.122  0.00  0.00            
ATOM   1825  CD  ARG X 334      35.053  21.254  48.166  0.00  0.00            
ATOM   1826  HD1 ARG X 334      35.637  21.420  49.097  0.00  0.00            
ATOM   1827  HD2 ARG X 334      35.263  20.223  47.810  0.00  0.00            
ATOM   1828  NE  ARG X 334      33.588  21.536  48.287  0.00  0.00            
ATOM   1829  HE  ARG X 334      33.179  21.929  49.111  0.00  0.00            
ATOM   1830  CZ  ARG X 334      32.683  21.092  47.388  0.00  0.00            
ATOM   1831  NH1 ARG X 334      32.906  20.388  46.287  0.00  0.00            
ATOM   1832 HH11 ARG X 334      33.610  19.680  46.338  0.00  0.00            
ATOM   1833 HH12 ARG X 334      32.134  20.054  45.745  0.00  0.00            
ATOM   1834  NH2 ARG X 334      31.399  21.449  47.543  0.00  0.00            
ATOM   1835 HH21 ARG X 334      31.093  22.099  48.238  0.00  0.00            
ATOM   1836 HH22 ARG X 334      30.911  21.409  46.670  0.00  0.00            
ATOM   1837  C   ARG X 334      36.264  25.907  46.502  0.00  0.00            
ATOM   1838  O   ARG X 334      36.370  26.560  47.510  0.00  0.00            
ATOM   1839  N   ASN X 335      35.693  26.483  45.451  0.00  0.00            
ATOM   1840  HN  ASN X 335      35.536  25.927  44.639  0.00  0.00            
ATOM   1841  CA  ASN X 335      35.318  27.852  45.311  0.00  0.00            
ATOM   1842  HA  ASN X 335      35.768  28.455  46.086  0.00  0.00            
ATOM   1843  CB  ASN X 335      36.022  28.346  43.984  0.00  0.00            
ATOM   1844  HB1 ASN X 335      35.690  27.899  43.023  0.00  0.00            
ATOM   1845  HB2 ASN X 335      37.073  27.991  44.052  0.00  0.00            
ATOM   1846  CG  ASN X 335      35.849  29.887  43.910  0.00  0.00            
ATOM   1847  OD1 ASN X 335      35.967  30.621  44.908  0.00  0.00            
ATOM   1848  ND2 ASN X 335      35.572  30.461  42.739  0.00  0.00            
ATOM   1849 HD21 ASN X 335      35.624  29.960  41.875  0.00  0.00            
ATOM   1850 HD22 ASN X 335      35.320  31.417  42.888  0.00  0.00            
ATOM   1851  C   ASN X 335      33.751  27.966  45.222  0.00  0.00            
ATOM   1852  O   ASN X 335      33.120  26.981  44.882  0.00  0.00            
ATOM   1853  N   LYS X 336      33.256  29.154  45.546  0.00  0.00            
ATOM   1854  HN  LYS X 336      33.889  29.916  45.653  0.00  0.00            
ATOM   1855  CA  LYS X 336      31.873  29.494  45.643  0.00  0.00            
ATOM   1856  HA  LYS X 336      31.844  30.550  45.864  0.00  0.00            
ATOM   1857  CB  LYS X 336      31.060  29.356  44.293  0.00  0.00            
ATOM   1858  HB1 LYS X 336      30.102  29.915  44.350  0.00  0.00            
ATOM   1859  HB2 LYS X 336      30.795  28.278  44.235  0.00  0.00            
ATOM   1860  CG  LYS X 336      31.828  29.685  43.023  0.00  0.00            
ATOM   1861  HG1 LYS X 336      32.623  28.931  42.839  0.00  0.00            
ATOM   1862  HG2 LYS X 336      32.333  30.656  43.213  0.00  0.00            
ATOM   1863  CD  LYS X 336      30.980  29.590  41.760  0.00  0.00            
ATOM   1864  HD1 LYS X 336      30.174  30.354  41.720  0.00  0.00            
ATOM   1865  HD2 LYS X 336      30.575  28.556  41.780  0.00  0.00            
ATOM   1866  CE  LYS X 336      31.925  29.854  40.532  0.00  0.00            
ATOM   1867  HE1 LYS X 336      32.793  29.163  40.580  0.00  0.00            
ATOM   1868  HE2 LYS X 336      32.223  30.915  40.395  0.00  0.00            
ATOM   1869  NZ  LYS X 336      31.244  29.381  39.299  0.00  0.00            
ATOM   1870  HZ1 LYS X 336      30.287  29.758  39.150  0.00  0.00            
ATOM   1871  HZ2 LYS X 336      31.240  28.352  39.448  0.00  0.00            
ATOM   1872  HZ3 LYS X 336      31.778  29.652  38.448  0.00  0.00            
ATOM   1873  C   LYS X 336      31.176  28.899  46.865  0.00  0.00            
ATOM   1874  O   LYS X 336      30.069  28.414  46.710  0.00  0.00            
ATOM   1875  N   ALA X 337      31.827  28.870  47.983  0.00  0.00            
ATOM   1876  HN  ALA X 337      32.767  29.203  48.000  0.00  0.00            
ATOM   1877  CA  ALA X 337      31.282  28.341  49.208  0.00  0.00            
ATOM   1878  HA  ALA X 337      30.798  27.411  48.947  0.00  0.00            
ATOM   1879  CB  ALA X 337      32.420  28.012  50.282  0.00  0.00            
ATOM   1880  HB1 ALA X 337      32.864  28.968  50.633  0.00  0.00            
ATOM   1881  HB2 ALA X 337      33.106  27.266  49.827  0.00  0.00            
ATOM   1882  HB3 ALA X 337      31.802  27.564  51.089  0.00  0.00            
ATOM   1883  C   ALA X 337      30.171  29.210  49.795  0.00  0.00            
ATOM   1884  O   ALA X 337      29.498  28.721  50.693  0.00  0.00            
ATOM   1885  N   ASP X 338      30.016  30.457  49.217  0.00  0.00            
ATOM   1886  HN  ASP X 338      30.688  30.644  48.504  0.00  0.00            
ATOM   1887  CA  ASP X 338      28.998  31.449  49.489  0.00  0.00            
ATOM   1888  HA  ASP X 338      28.923  31.498  50.565  0.00  0.00            
ATOM   1889  CB  ASP X 338      29.268  32.905  48.945  0.00  0.00            
ATOM   1890  HB1 ASP X 338      30.193  33.290  49.426  0.00  0.00            
ATOM   1891  HB2 ASP X 338      28.402  33.553  49.197  0.00  0.00            
ATOM   1892  CG  ASP X 338      29.605  32.920  47.509  0.00  0.00            
ATOM   1893  OD1 ASP X 338      30.673  32.462  47.034  0.00  0.00            
ATOM   1894  OD2 ASP X 338      28.721  33.363  46.698  0.00  0.00            
ATOM   1895  C   ASP X 338      27.570  30.953  49.195  0.00  0.00            
ATOM   1896  O   ASP X 338      26.564  31.069  49.956  0.00  0.00            
ATOM   1897  N   ILE X 339      27.545  30.291  48.044  0.00  0.00            
ATOM   1898  HN  ILE X 339      28.233  30.241  47.324  0.00  0.00            
ATOM   1899  CA  ILE X 339      26.297  29.547  47.697  0.00  0.00            
ATOM   1900  HA  ILE X 339      25.466  30.215  47.868  0.00  0.00            
ATOM   1901  CB  ILE X 339      26.266  29.119  46.218  0.00  0.00            
ATOM   1902  HB  ILE X 339      27.086  28.378  46.102  0.00  0.00            
ATOM   1903  CG2 ILE X 339      24.828  28.585  45.841  0.00  0.00            
ATOM   1904 HG21 ILE X 339      23.970  29.289  45.886  0.00  0.00            
ATOM   1905 HG22 ILE X 339      24.616  27.645  46.394  0.00  0.00            
ATOM   1906 HG23 ILE X 339      24.920  28.424  44.746  0.00  0.00            
ATOM   1907  CG1 ILE X 339      26.701  30.365  45.428  0.00  0.00            
ATOM   1908 HG11 ILE X 339      26.701  30.060  44.360  0.00  0.00            
ATOM   1909 HG12 ILE X 339      27.740  30.705  45.628  0.00  0.00            
ATOM   1910  CD  ILE X 339      25.738  31.570  45.624  0.00  0.00            
ATOM   1911  HD1 ILE X 339      25.685  31.900  46.683  0.00  0.00            
ATOM   1912  HD2 ILE X 339      24.681  31.342  45.369  0.00  0.00            
ATOM   1913  HD3 ILE X 339      25.964  32.397  44.917  0.00  0.00            
ATOM   1914  C   ILE X 339      25.959  28.312  48.497  0.00  0.00            
ATOM   1915  O   ILE X 339      24.790  28.128  48.874  0.00  0.00            
ATOM   1916  N   THR X 340      26.926  27.373  48.838  0.00  0.00            
ATOM   1917  HN  THR X 340      27.893  27.410  48.598  0.00  0.00            
ATOM   1918  CA  THR X 340      26.632  26.059  49.407  0.00  0.00            
ATOM   1919  HA  THR X 340      25.674  25.761  49.008  0.00  0.00            
ATOM   1920  CB  THR X 340      27.706  25.000  49.142  0.00  0.00            
ATOM   1921  HB  THR X 340      27.517  24.057  49.698  0.00  0.00            
ATOM   1922  OG1 THR X 340      29.018  25.467  49.336  0.00  0.00            
ATOM   1923  HG1 THR X 340      29.610  24.720  49.215  0.00  0.00            
ATOM   1924  CG2 THR X 340      27.583  24.694  47.585  0.00  0.00            
ATOM   1925 HG21 THR X 340      27.652  25.639  47.006  0.00  0.00            
ATOM   1926 HG22 THR X 340      26.584  24.250  47.387  0.00  0.00            
ATOM   1927 HG23 THR X 340      28.373  23.954  47.333  0.00  0.00            
ATOM   1928  C   THR X 340      26.517  26.145  50.944  0.00  0.00            
ATOM   1929  O   THR X 340      25.966  25.226  51.518  0.00  0.00            
ATOM   1930  N   GLY X 341      27.031  27.098  51.619  0.00  0.00            
ATOM   1931  HN  GLY X 341      27.395  27.771  50.980  0.00  0.00            
ATOM   1932  CA  GLY X 341      27.156  27.152  53.098  0.00  0.00            
ATOM   1933  HA1 GLY X 341      26.266  26.691  53.500  0.00  0.00            
ATOM   1934  HA2 GLY X 341      27.411  28.140  53.451  0.00  0.00            
ATOM   1935  C   GLY X 341      28.243  26.292  53.754  0.00  0.00            
ATOM   1936  O   GLY X 341      28.318  26.043  54.913  0.00  0.00            
ATOM   1937  N   GLU X 342      29.251  25.915  52.911  0.00  0.00            
ATOM   1938  HN  GLU X 342      29.230  26.140  51.940  0.00  0.00            
ATOM   1939  CA  GLU X 342      30.408  25.270  53.426  0.00  0.00            
ATOM   1940  HA  GLU X 342      29.993  24.472  54.025  0.00  0.00            
ATOM   1941  CB  GLU X 342      31.183  24.632  52.243  0.00  0.00            
ATOM   1942  HB1 GLU X 342      32.201  24.277  52.510  0.00  0.00            
ATOM   1943  HB2 GLU X 342      31.411  25.496  51.583  0.00  0.00            
ATOM   1944  CG  GLU X 342      30.447  23.489  51.568  0.00  0.00            
ATOM   1945  HG1 GLU X 342      29.449  23.901  51.307  0.00  0.00            
ATOM   1946  HG2 GLU X 342      30.317  22.599  52.222  0.00  0.00            
ATOM   1947  CD  GLU X 342      30.983  22.970  50.273  0.00  0.00            
ATOM   1948  OE1 GLU X 342      30.446  23.225  49.171  0.00  0.00            
ATOM   1949  OE2 GLU X 342      32.066  22.366  50.309  0.00  0.00            
ATOM   1950  C   GLU X 342      31.422  26.057  54.310  0.00  0.00            
ATOM   1951  O   GLU X 342      31.567  27.278  54.177  0.00  0.00            
ATOM   1952  N   THR X 343      32.130  25.344  55.265  0.00  0.00            
ATOM   1953  HN  THR X 343      32.146  24.349  55.201  0.00  0.00            
ATOM   1954  CA  THR X 343      32.830  25.902  56.401  0.00  0.00            
ATOM   1955  HA  THR X 343      32.266  26.685  56.886  0.00  0.00            
ATOM   1956  CB  THR X 343      33.069  24.895  57.513  0.00  0.00            
ATOM   1957  HB  THR X 343      33.674  24.047  57.126  0.00  0.00            
ATOM   1958  OG1 THR X 343      31.838  24.362  58.052  0.00  0.00            
ATOM   1959  HG1 THR X 343      31.965  23.411  58.053  0.00  0.00            
ATOM   1960  CG2 THR X 343      33.655  25.576  58.804  0.00  0.00            
ATOM   1961 HG21 THR X 343      33.619  24.879  59.668  0.00  0.00            
ATOM   1962 HG22 THR X 343      33.221  26.585  58.970  0.00  0.00            
ATOM   1963 HG23 THR X 343      34.738  25.705  58.592  0.00  0.00            
ATOM   1964  C   THR X 343      34.163  26.449  55.965  0.00  0.00            
ATOM   1965  O   THR X 343      35.125  25.738  55.547  0.00  0.00            
ATOM   1966  N   LEU X 344      34.314  27.824  56.081  0.00  0.00            
ATOM   1967  HN  LEU X 344      33.580  28.466  56.290  0.00  0.00            
ATOM   1968  CA  LEU X 344      35.523  28.526  55.894  0.00  0.00            
ATOM   1969  HA  LEU X 344      35.900  28.163  54.950  0.00  0.00            
ATOM   1970  CB  LEU X 344      35.281  30.086  55.841  0.00  0.00            
ATOM   1971  HB1 LEU X 344      36.310  30.459  55.648  0.00  0.00            
ATOM   1972  HB2 LEU X 344      34.940  30.451  56.834  0.00  0.00            
ATOM   1973  CG  LEU X 344      34.420  30.587  54.702  0.00  0.00            
ATOM   1974  HG  LEU X 344      33.395  30.237  54.950  0.00  0.00            
ATOM   1975  CD1 LEU X 344      34.305  32.138  54.810  0.00  0.00            
ATOM   1976 HD11 LEU X 344      33.756  32.380  55.745  0.00  0.00            
ATOM   1977 HD12 LEU X 344      33.851  32.487  53.858  0.00  0.00            
ATOM   1978 HD13 LEU X 344      35.368  32.451  54.892  0.00  0.00            
ATOM   1979  CD2 LEU X 344      35.052  30.140  53.425  0.00  0.00            
ATOM   1980 HD21 LEU X 344      35.228  29.054  53.267  0.00  0.00            
ATOM   1981 HD22 LEU X 344      34.321  30.302  52.604  0.00  0.00            
ATOM   1982 HD23 LEU X 344      36.005  30.662  53.194  0.00  0.00            
ATOM   1983  C   LEU X 344      36.555  28.179  56.987  0.00  0.00            
ATOM   1984  O   LEU X 344      36.182  27.931  58.153  0.00  0.00            
ATOM   1985  N   GLY X 345      37.875  28.148  56.674  0.00  0.00            
ATOM   1986  HN  GLY X 345      38.213  28.435  55.781  0.00  0.00            
ATOM   1987  CA  GLY X 345      38.881  27.508  57.560  0.00  0.00            
ATOM   1988  HA1 GLY X 345      38.342  26.956  58.315  0.00  0.00            
ATOM   1989  HA2 GLY X 345      39.556  28.265  57.930  0.00  0.00            
ATOM   1990  C   GLY X 345      39.623  26.541  56.663  0.00  0.00            
ATOM   1991  O   GLY X 345      39.655  26.666  55.443  0.00  0.00            
ATOM   1992  N   MET X 346      40.335  25.556  57.338  0.00  0.00            
ATOM   1993  HN  MET X 346      40.102  25.365  58.288  0.00  0.00            
ATOM   1994  CA  MET X 346      41.294  24.703  56.640  0.00  0.00            
ATOM   1995  HA  MET X 346      41.323  24.915  55.581  0.00  0.00            
ATOM   1996  CB  MET X 346      42.783  24.857  57.122  0.00  0.00            
ATOM   1997  HB1 MET X 346      43.328  23.912  56.915  0.00  0.00            
ATOM   1998  HB2 MET X 346      42.694  24.908  58.229  0.00  0.00            
ATOM   1999  CG  MET X 346      43.445  26.050  56.379  0.00  0.00            
ATOM   2000  HG1 MET X 346      44.426  26.266  56.856  0.00  0.00            
ATOM   2001  HG2 MET X 346      42.928  26.970  56.724  0.00  0.00            
ATOM   2002  SD  MET X 346      43.465  25.875  54.457  0.00  0.00            
ATOM   2003  CE  MET X 346      44.261  24.254  54.157  0.00  0.00            
ATOM   2004  HE1 MET X 346      44.079  23.491  54.944  0.00  0.00            
ATOM   2005  HE2 MET X 346      44.018  23.859  53.148  0.00  0.00            
ATOM   2006  HE3 MET X 346      45.346  24.491  54.131  0.00  0.00            
ATOM   2007  C   MET X 346      40.934  23.278  56.818  0.00  0.00            
ATOM   2008  O   MET X 346      40.411  22.908  57.863  0.00  0.00            
ATOM   2009  N   SER X 347      41.271  22.405  55.866  0.00  0.00            
ATOM   2010  HN  SER X 347      41.727  22.537  54.989  0.00  0.00            
ATOM   2011  CA  SER X 347      40.981  20.976  55.944  0.00  0.00            
ATOM   2012  HA  SER X 347      41.168  20.596  56.938  0.00  0.00            
ATOM   2013  CB  SER X 347      39.584  20.724  55.371  0.00  0.00            
ATOM   2014  HB1 SER X 347      39.579  20.647  54.263  0.00  0.00            
ATOM   2015  HB2 SER X 347      39.050  21.624  55.746  0.00  0.00            
ATOM   2016  OG  SER X 347      39.028  19.467  55.771  0.00  0.00            
ATOM   2017  HG1 SER X 347      38.346  19.643  56.422  0.00  0.00            
ATOM   2018  C   SER X 347      41.954  20.061  55.119  0.00  0.00            
ATOM   2019  O   SER X 347      42.853  20.589  54.484  0.00  0.00            
ATOM   2020  N   GLU X 348      41.997  18.776  55.288  0.00  0.00            
ATOM   2021  HN  GLU X 348      41.268  18.350  55.818  0.00  0.00            
ATOM   2022  CA  GLU X 348      42.978  17.892  54.569  0.00  0.00            
ATOM   2023  HA  GLU X 348      43.380  18.276  53.643  0.00  0.00            
ATOM   2024  CB  GLU X 348      44.176  17.539  55.506  0.00  0.00            
ATOM   2025  HB1 GLU X 348      43.777  16.836  56.268  0.00  0.00            
ATOM   2026  HB2 GLU X 348      44.626  18.429  55.996  0.00  0.00            
ATOM   2027  CG  GLU X 348      45.387  16.931  54.737  0.00  0.00            
ATOM   2028  HG1 GLU X 348      45.716  17.795  54.122  0.00  0.00            
ATOM   2029  HG2 GLU X 348      45.155  16.131  54.001  0.00  0.00            
ATOM   2030  CD  GLU X 348      46.502  16.488  55.758  0.00  0.00            
ATOM   2031  OE1 GLU X 348      46.206  15.453  56.408  0.00  0.00            
ATOM   2032  OE2 GLU X 348      47.562  17.165  55.785  0.00  0.00            
ATOM   2033  C   GLU X 348      42.128  16.679  54.197  0.00  0.00            
ATOM   2034  O   GLU X 348      41.243  16.141  54.840  0.00  0.00            
ATOM   2035  N   VAL X 349      42.403  16.281  52.966  0.00  0.00            
ATOM   2036  HN  VAL X 349      42.946  16.866  52.369  0.00  0.00            
ATOM   2037  CA  VAL X 349      41.934  14.986  52.452  0.00  0.00            
ATOM   2038  HA  VAL X 349      41.930  14.231  53.224  0.00  0.00            
ATOM   2039  CB  VAL X 349      40.514  14.974  51.844  0.00  0.00            
ATOM   2040  HB  VAL X 349      39.811  15.351  52.618  0.00  0.00            
ATOM   2041  CG1 VAL X 349      40.458  15.914  50.609  0.00  0.00            
ATOM   2042 HG11 VAL X 349      40.770  16.958  50.830  0.00  0.00            
ATOM   2043 HG12 VAL X 349      41.115  15.585  49.776  0.00  0.00            
ATOM   2044 HG13 VAL X 349      39.413  15.929  50.232  0.00  0.00            
ATOM   2045  CG2 VAL X 349      40.055  13.573  51.431  0.00  0.00            
ATOM   2046 HG21 VAL X 349      40.294  13.238  50.399  0.00  0.00            
ATOM   2047 HG22 VAL X 349      38.968  13.677  51.227  0.00  0.00            
ATOM   2048 HG23 VAL X 349      40.292  12.883  52.270  0.00  0.00            
ATOM   2049  C   VAL X 349      42.997  14.449  51.421  0.00  0.00            
ATOM   2050  O   VAL X 349      43.649  15.116  50.552  0.00  0.00            
ATOM   2051  N   ASN X 350      43.298  13.137  51.565  0.00  0.00            
ATOM   2052  HN  ASN X 350      42.858  12.560  52.249  0.00  0.00            
ATOM   2053  CA  ASN X 350      44.135  12.329  50.785  0.00  0.00            
ATOM   2054  HA  ASN X 350      44.069  11.298  51.098  0.00  0.00            
ATOM   2055  CB  ASN X 350      43.610  12.197  49.334  0.00  0.00            
ATOM   2056  HB1 ASN X 350      43.951  13.097  48.779  0.00  0.00            
ATOM   2057  HB2 ASN X 350      42.502  12.279  49.339  0.00  0.00            
ATOM   2058  CG  ASN X 350      44.029  10.930  48.610  0.00  0.00            
ATOM   2059  OD1 ASN X 350      44.705  10.043  49.160  0.00  0.00            
ATOM   2060  ND2 ASN X 350      43.540  10.784  47.321  0.00  0.00            
ATOM   2061 HD21 ASN X 350      42.701  11.292  47.128  0.00  0.00            
ATOM   2062 HD22 ASN X 350      43.795   9.981  46.782  0.00  0.00            
ATOM   2063  C   ASN X 350      45.608  12.879  50.743  0.00  0.00            
ATOM   2064  O   ASN X 350      46.413  12.836  49.751  0.00  0.00            
ATOM   2065  N   GLY X 351      46.021  13.517  51.860  0.00  0.00            
ATOM   2066  HN  GLY X 351      45.489  13.649  52.693  0.00  0.00            
ATOM   2067  CA  GLY X 351      47.354  13.941  52.036  0.00  0.00            
ATOM   2068  HA1 GLY X 351      48.030  13.192  51.651  0.00  0.00            
ATOM   2069  HA2 GLY X 351      47.435  13.911  53.113  0.00  0.00            
ATOM   2070  C   GLY X 351      47.733  15.268  51.402  0.00  0.00            
ATOM   2071  O   GLY X 351      48.868  15.643  51.261  0.00  0.00            
ATOM   2072  N   HSE X 352      46.701  15.943  50.811  0.00  0.00            
ATOM   2073  HN  HSE X 352      45.819  15.479  50.845  0.00  0.00            
ATOM   2074  CA  HSE X 352      46.730  17.275  50.174  0.00  0.00            
ATOM   2075  HA  HSE X 352      47.728  17.663  50.310  0.00  0.00            
ATOM   2076  CB  HSE X 352      46.276  17.097  48.750  0.00  0.00            
ATOM   2077  HB1 HSE X 352      46.031  18.070  48.273  0.00  0.00            
ATOM   2078  HB2 HSE X 352      45.366  16.463  48.819  0.00  0.00            
ATOM   2079  ND1 HSE X 352      46.906  16.025  46.616  0.00  0.00            
ATOM   2080  CG  HSE X 352      47.328  16.487  47.883  0.00  0.00            
ATOM   2081  CE1 HSE X 352      48.061  15.550  46.040  0.00  0.00            
ATOM   2082  HE1 HSE X 352      48.056  15.159  45.023  0.00  0.00            
ATOM   2083  NE2 HSE X 352      49.114  15.771  46.860  0.00  0.00            
ATOM   2084  HE2 HSE X 352      50.092  15.725  46.655  0.00  0.00            
ATOM   2085  CD2 HSE X 352      48.663  16.294  48.035  0.00  0.00            
ATOM   2086  HD2 HSE X 352      49.340  16.569  48.834  0.00  0.00            
ATOM   2087  C   HSE X 352      45.809  18.195  50.951  0.00  0.00            
ATOM   2088  O   HSE X 352      44.676  17.854  51.290  0.00  0.00            
ATOM   2089  N   ALA X 353      46.262  19.457  51.287  0.00  0.00            
ATOM   2090  HN  ALA X 353      47.222  19.605  51.060  0.00  0.00            
ATOM   2091  CA  ALA X 353      45.456  20.502  51.852  0.00  0.00            
ATOM   2092  HA  ALA X 353      44.959  20.087  52.716  0.00  0.00            
ATOM   2093  CB  ALA X 353      46.370  21.709  52.016  0.00  0.00            
ATOM   2094  HB1 ALA X 353      47.211  21.507  52.713  0.00  0.00            
ATOM   2095  HB2 ALA X 353      45.798  22.587  52.386  0.00  0.00            
ATOM   2096  HB3 ALA X 353      46.899  21.917  51.061  0.00  0.00            
ATOM   2097  C   ALA X 353      44.236  20.926  51.054  0.00  0.00            
ATOM   2098  O   ALA X 353      44.291  21.085  49.892  0.00  0.00            
ATOM   2099  N   LEU X 354      43.093  21.022  51.777  0.00  0.00            
ATOM   2100  HN  LEU X 354      43.135  20.922  52.768  0.00  0.00            
ATOM   2101  CA  LEU X 354      41.809  21.224  51.181  0.00  0.00            
ATOM   2102  HA  LEU X 354      41.801  21.427  50.120  0.00  0.00            
ATOM   2103  CB  LEU X 354      40.761  20.178  51.599  0.00  0.00            
ATOM   2104  HB1 LEU X 354      40.770  20.111  52.708  0.00  0.00            
ATOM   2105  HB2 LEU X 354      41.142  19.226  51.172  0.00  0.00            
ATOM   2106  CG  LEU X 354      39.245  20.372  51.143  0.00  0.00            
ATOM   2107  HG  LEU X 354      39.019  21.376  51.561  0.00  0.00            
ATOM   2108  CD1 LEU X 354      39.150  20.324  49.610  0.00  0.00            
ATOM   2109 HD11 LEU X 354      38.100  20.422  49.260  0.00  0.00            
ATOM   2110 HD12 LEU X 354      39.396  19.284  49.306  0.00  0.00            
ATOM   2111 HD13 LEU X 354      39.785  20.994  48.993  0.00  0.00            
ATOM   2112  CD2 LEU X 354      38.266  19.398  51.776  0.00  0.00            
ATOM   2113 HD21 LEU X 354      38.400  19.241  52.867  0.00  0.00            
ATOM   2114 HD22 LEU X 354      37.190  19.648  51.663  0.00  0.00            
ATOM   2115 HD23 LEU X 354      38.459  18.388  51.353  0.00  0.00            
ATOM   2116  C   LEU X 354      41.287  22.526  51.822  0.00  0.00            
ATOM   2117  O   LEU X 354      41.526  22.762  52.942  0.00  0.00            
ATOM   2118  N   ILE X 355      40.650  23.431  51.018  0.00  0.00            
ATOM   2119  HN  ILE X 355      40.566  23.286  50.036  0.00  0.00            
ATOM   2120  CA  ILE X 355      40.130  24.647  51.619  0.00  0.00            
ATOM   2121  HA  ILE X 355      39.900  24.596  52.673  0.00  0.00            
ATOM   2122  CB  ILE X 355      41.212  25.747  51.562  0.00  0.00            
ATOM   2123  HB  ILE X 355      42.088  25.429  52.166  0.00  0.00            
ATOM   2124  CG2 ILE X 355      41.775  26.146  50.132  0.00  0.00            
ATOM   2125 HG21 ILE X 355      40.909  26.389  49.480  0.00  0.00            
ATOM   2126 HG22 ILE X 355      42.257  25.253  49.678  0.00  0.00            
ATOM   2127 HG23 ILE X 355      42.595  26.894  50.179  0.00  0.00            
ATOM   2128  CG1 ILE X 355      40.620  27.080  52.187  0.00  0.00            
ATOM   2129 HG11 ILE X 355      40.445  26.842  53.258  0.00  0.00            
ATOM   2130 HG12 ILE X 355      39.659  27.310  51.680  0.00  0.00            
ATOM   2131  CD  ILE X 355      41.581  28.246  52.118  0.00  0.00            
ATOM   2132  HD1 ILE X 355      42.553  28.123  52.641  0.00  0.00            
ATOM   2133  HD2 ILE X 355      41.147  29.158  52.580  0.00  0.00            
ATOM   2134  HD3 ILE X 355      41.771  28.601  51.082  0.00  0.00            
ATOM   2135  C   ILE X 355      38.913  25.068  50.800  0.00  0.00            
ATOM   2136  O   ILE X 355      38.875  24.922  49.566  0.00  0.00            
ATOM   2137  N   ARG X 356      37.877  25.665  51.493  0.00  0.00            
ATOM   2138  HN  ARG X 356      38.018  25.852  52.462  0.00  0.00            
ATOM   2139  CA  ARG X 356      36.816  26.195  50.747  0.00  0.00            
ATOM   2140  HA  ARG X 356      37.033  26.060  49.698  0.00  0.00            
ATOM   2141  CB  ARG X 356      35.428  25.697  51.202  0.00  0.00            
ATOM   2142  HB1 ARG X 356      34.732  26.256  50.541  0.00  0.00            
ATOM   2143  HB2 ARG X 356      35.214  25.962  52.260  0.00  0.00            
ATOM   2144  CG  ARG X 356      35.016  24.240  50.981  0.00  0.00            
ATOM   2145  HG1 ARG X 356      35.698  23.665  50.319  0.00  0.00            
ATOM   2146  HG2 ARG X 356      33.911  24.183  50.878  0.00  0.00            
ATOM   2147  CD  ARG X 356      35.194  23.396  52.221  0.00  0.00            
ATOM   2148  HD1 ARG X 356      34.886  23.886  53.170  0.00  0.00            
ATOM   2149  HD2 ARG X 356      36.276  23.198  52.378  0.00  0.00            
ATOM   2150  NE  ARG X 356      34.357  22.122  52.007  0.00  0.00            
ATOM   2151  HE  ARG X 356      33.549  22.065  51.420  0.00  0.00            
ATOM   2152  CZ  ARG X 356      34.538  20.965  52.729  0.00  0.00            
ATOM   2153  NH1 ARG X 356      33.882  19.906  52.307  0.00  0.00            
ATOM   2154 HH11 ARG X 356      33.271  20.003  51.521  0.00  0.00            
ATOM   2155 HH12 ARG X 356      33.846  19.091  52.884  0.00  0.00            
ATOM   2156  NH2 ARG X 356      35.349  20.919  53.790  0.00  0.00            
ATOM   2157 HH21 ARG X 356      35.892  21.669  54.168  0.00  0.00            
ATOM   2158 HH22 ARG X 356      35.561  20.018  54.169  0.00  0.00            
ATOM   2159  C   ARG X 356      36.751  27.681  50.852  0.00  0.00            
ATOM   2160  O   ARG X 356      37.115  28.221  51.953  0.00  0.00            
ATOM   2161  N   LEU X 357      36.467  28.454  49.762  0.00  0.00            
ATOM   2162  HN  LEU X 357      36.147  28.020  48.924  0.00  0.00            
ATOM   2163  CA  LEU X 357      36.469  29.891  49.833  0.00  0.00            
ATOM   2164  HA  LEU X 357      36.150  30.241  50.804  0.00  0.00            
ATOM   2165  CB  LEU X 357      37.897  30.569  49.723  0.00  0.00            
ATOM   2166  HB1 LEU X 357      38.430  30.334  50.669  0.00  0.00            
ATOM   2167  HB2 LEU X 357      37.821  31.676  49.667  0.00  0.00            
ATOM   2168  CG  LEU X 357      38.829  29.940  48.598  0.00  0.00            
ATOM   2169  HG  LEU X 357      38.618  28.849  48.579  0.00  0.00            
ATOM   2170  CD1 LEU X 357      38.578  30.600  47.286  0.00  0.00            
ATOM   2171 HD11 LEU X 357      37.539  30.527  46.901  0.00  0.00            
ATOM   2172 HD12 LEU X 357      39.343  30.316  46.531  0.00  0.00            
ATOM   2173 HD13 LEU X 357      38.865  31.671  47.361  0.00  0.00            
ATOM   2174  CD2 LEU X 357      40.294  30.150  49.128  0.00  0.00            
ATOM   2175 HD21 LEU X 357      40.340  29.470  50.006  0.00  0.00            
ATOM   2176 HD22 LEU X 357      40.957  29.720  48.346  0.00  0.00            
ATOM   2177 HD23 LEU X 357      40.521  31.201  49.408  0.00  0.00            
ATOM   2178  C   LEU X 357      35.399  30.459  48.883  0.00  0.00            
ATOM   2179  O   LEU X 357      34.684  29.730  48.191  0.00  0.00            
ATOM   2180  N   SER X 358      35.312  31.807  48.865  0.00  0.00            
ATOM   2181  HN  SER X 358      35.925  32.250  49.515  0.00  0.00            
ATOM   2182  CA  SER X 358      34.654  32.643  47.891  0.00  0.00            
ATOM   2183  HA  SER X 358      34.255  32.006  47.115  0.00  0.00            
ATOM   2184  CB  SER X 358      33.431  33.378  48.584  0.00  0.00            
ATOM   2185  HB1 SER X 358      33.822  34.037  49.388  0.00  0.00            
ATOM   2186  HB2 SER X 358      32.859  32.560  49.072  0.00  0.00            
ATOM   2187  OG  SER X 358      32.572  34.058  47.652  0.00  0.00            
ATOM   2188  HG1 SER X 358      31.937  33.416  47.326  0.00  0.00            
ATOM   2189  C   SER X 358      35.604  33.678  47.416  0.00  0.00            
ATOM   2190  O   SER X 358      36.028  34.595  48.129  0.00  0.00            
ATOM   2191  N   ALA X 359      35.872  33.608  46.102  0.00  0.00            
ATOM   2192  HN  ALA X 359      35.522  32.894  45.500  0.00  0.00            
ATOM   2193  CA  ALA X 359      36.748  34.543  45.389  0.00  0.00            
ATOM   2194  HA  ALA X 359      37.563  34.882  46.010  0.00  0.00            
ATOM   2195  CB  ALA X 359      37.259  33.872  44.026  0.00  0.00            
ATOM   2196  HB1 ALA X 359      37.825  32.925  44.163  0.00  0.00            
ATOM   2197  HB2 ALA X 359      37.959  34.550  43.493  0.00  0.00            
ATOM   2198  HB3 ALA X 359      36.392  33.790  43.337  0.00  0.00            
ATOM   2199  C   ALA X 359      36.044  35.788  44.995  0.00  0.00            
ATOM   2200  O   ALA X 359      36.647  36.777  44.711  0.00  0.00            
ATOM   2201  N   ARG X 360      34.695  35.802  44.935  0.00  0.00            
ATOM   2202  HN  ARG X 360      34.225  34.923  44.952  0.00  0.00            
ATOM   2203  CA  ARG X 360      33.939  37.005  44.547  0.00  0.00            
ATOM   2204  HA  ARG X 360      34.419  37.522  43.729  0.00  0.00            
ATOM   2205  CB  ARG X 360      32.521  36.592  44.026  0.00  0.00            
ATOM   2206  HB1 ARG X 360      31.902  36.007  44.739  0.00  0.00            
ATOM   2207  HB2 ARG X 360      32.758  36.006  43.112  0.00  0.00            
ATOM   2208  CG  ARG X 360      31.623  37.718  43.547  0.00  0.00            
ATOM   2209  HG1 ARG X 360      32.202  38.471  42.971  0.00  0.00            
ATOM   2210  HG2 ARG X 360      31.214  38.285  44.410  0.00  0.00            
ATOM   2211  CD  ARG X 360      30.437  37.179  42.743  0.00  0.00            
ATOM   2212  HD1 ARG X 360      29.819  36.476  43.341  0.00  0.00            
ATOM   2213  HD2 ARG X 360      30.856  36.758  41.804  0.00  0.00            
ATOM   2214  NE  ARG X 360      29.608  38.353  42.233  0.00  0.00            
ATOM   2215  HE  ARG X 360      29.885  38.889  41.436  0.00  0.00            
ATOM   2216  CZ  ARG X 360      28.626  38.846  42.921  0.00  0.00            
ATOM   2217  NH1 ARG X 360      28.038  38.218  43.979  0.00  0.00            
ATOM   2218 HH11 ARG X 360      28.528  37.461  44.412  0.00  0.00            
ATOM   2219 HH12 ARG X 360      27.540  38.787  44.634  0.00  0.00            
ATOM   2220  NH2 ARG X 360      27.964  39.993  42.693  0.00  0.00            
ATOM   2221 HH21 ARG X 360      28.229  40.464  41.851  0.00  0.00            
ATOM   2222 HH22 ARG X 360      27.185  40.216  43.278  0.00  0.00            
ATOM   2223  C   ARG X 360      33.802  37.980  45.719  0.00  0.00            
ATOM   2224  O   ARG X 360      34.177  39.157  45.699  0.00  0.00            
ATOM   2225  N   THR X 361      33.322  37.337  46.863  0.00  0.00            
ATOM   2226  HN  THR X 361      33.197  36.350  46.934  0.00  0.00            
ATOM   2227  CA  THR X 361      33.114  38.096  48.092  0.00  0.00            
ATOM   2228  HA  THR X 361      32.721  39.052  47.780  0.00  0.00            
ATOM   2229  CB  THR X 361      32.114  37.421  49.043  0.00  0.00            
ATOM   2230  HB  THR X 361      32.014  38.139  49.884  0.00  0.00            
ATOM   2231  OG1 THR X 361      32.531  36.190  49.580  0.00  0.00            
ATOM   2232  HG1 THR X 361      32.609  35.507  48.910  0.00  0.00            
ATOM   2233  CG2 THR X 361      30.790  37.239  48.280  0.00  0.00            
ATOM   2234 HG21 THR X 361      30.547  38.133  47.667  0.00  0.00            
ATOM   2235 HG22 THR X 361      29.954  37.270  49.012  0.00  0.00            
ATOM   2236 HG23 THR X 361      30.880  36.410  47.546  0.00  0.00            
ATOM   2237  C   THR X 361      34.376  38.455  48.880  0.00  0.00            
ATOM   2238  O   THR X 361      34.394  39.358  49.733  0.00  0.00            
ATOM   2239  N   GLY X 362      35.529  37.793  48.535  0.00  0.00            
ATOM   2240  HN  GLY X 362      35.439  37.108  47.817  0.00  0.00            
ATOM   2241  CA  GLY X 362      36.903  37.948  49.157  0.00  0.00            
ATOM   2242  HA1 GLY X 362      37.016  39.016  49.265  0.00  0.00            
ATOM   2243  HA2 GLY X 362      37.618  37.513  48.475  0.00  0.00            
ATOM   2244  C   GLY X 362      37.096  37.059  50.368  0.00  0.00            
ATOM   2245  O   GLY X 362      38.212  36.993  50.860  0.00  0.00            
ATOM   2246  N   GLU X 363      35.985  36.393  50.887  0.00  0.00            
ATOM   2247  HN  GLU X 363      35.222  36.231  50.265  0.00  0.00            
ATOM   2248  CA  GLU X 363      35.927  35.632  52.122  0.00  0.00            
ATOM   2249  HA  GLU X 363      36.386  36.193  52.924  0.00  0.00            
ATOM   2250  CB  GLU X 363      34.476  35.560  52.592  0.00  0.00            
ATOM   2251  HB1 GLU X 363      34.487  34.961  53.527  0.00  0.00            
ATOM   2252  HB2 GLU X 363      33.781  35.034  51.903  0.00  0.00            
ATOM   2253  CG  GLU X 363      33.923  36.947  52.944  0.00  0.00            
ATOM   2254  HG1 GLU X 363      33.405  37.399  52.071  0.00  0.00            
ATOM   2255  HG2 GLU X 363      34.712  37.663  53.258  0.00  0.00            
ATOM   2256  CD  GLU X 363      32.890  36.857  54.064  0.00  0.00            
ATOM   2257  OE1 GLU X 363      33.140  37.081  55.273  0.00  0.00            
ATOM   2258  OE2 GLU X 363      31.709  36.451  53.700  0.00  0.00            
ATOM   2259  C   GLU X 363      36.537  34.196  52.070  0.00  0.00            
ATOM   2260  O   GLU X 363      36.428  33.403  51.140  0.00  0.00            
ATOM   2261  N   GLY X 364      37.354  33.801  53.100  0.00  0.00            
ATOM   2262  HN  GLY X 364      37.413  34.504  53.804  0.00  0.00            
ATOM   2263  CA  GLY X 364      38.197  32.616  53.141  0.00  0.00            
ATOM   2264  HA1 GLY X 364      37.606  31.815  52.720  0.00  0.00            
ATOM   2265  HA2 GLY X 364      38.525  32.362  54.138  0.00  0.00            
ATOM   2266  C   GLY X 364      39.440  32.721  52.370  0.00  0.00            
ATOM   2267  O   GLY X 364      40.272  31.825  52.359  0.00  0.00            
ATOM   2268  N   VAL X 365      39.633  33.920  51.756  0.00  0.00            
ATOM   2269  HN  VAL X 365      38.860  34.548  51.801  0.00  0.00            
ATOM   2270  CA  VAL X 365      40.865  34.100  50.945  0.00  0.00            
ATOM   2271  HA  VAL X 365      41.125  33.210  50.390  0.00  0.00            
ATOM   2272  CB  VAL X 365      40.706  35.185  49.823  0.00  0.00            
ATOM   2273  HB  VAL X 365      40.345  36.116  50.310  0.00  0.00            
ATOM   2274  CG1 VAL X 365      42.063  35.395  49.077  0.00  0.00            
ATOM   2275 HG11 VAL X 365      41.796  35.994  48.180  0.00  0.00            
ATOM   2276 HG12 VAL X 365      42.880  35.918  49.617  0.00  0.00            
ATOM   2277 HG13 VAL X 365      42.435  34.393  48.771  0.00  0.00            
ATOM   2278  CG2 VAL X 365      39.573  34.752  48.848  0.00  0.00            
ATOM   2279 HG21 VAL X 365      39.299  35.566  48.142  0.00  0.00            
ATOM   2280 HG22 VAL X 365      38.702  34.499  49.489  0.00  0.00            
ATOM   2281 HG23 VAL X 365      39.867  33.849  48.272  0.00  0.00            
ATOM   2282  C   VAL X 365      42.029  34.513  51.922  0.00  0.00            
ATOM   2283  O   VAL X 365      43.206  34.272  51.659  0.00  0.00            
ATOM   2284  N   ASP X 366      41.706  35.066  53.147  0.00  0.00            
ATOM   2285  HN  ASP X 366      40.780  35.383  53.341  0.00  0.00            
ATOM   2286  CA  ASP X 366      42.750  35.332  54.138  0.00  0.00            
ATOM   2287  HA  ASP X 366      43.497  35.816  53.525  0.00  0.00            
ATOM   2288  CB  ASP X 366      42.222  36.359  55.234  0.00  0.00            
ATOM   2289  HB1 ASP X 366      42.940  36.432  56.079  0.00  0.00            
ATOM   2290  HB2 ASP X 366      41.234  36.017  55.611  0.00  0.00            
ATOM   2291  CG  ASP X 366      42.098  37.721  54.528  0.00  0.00            
ATOM   2292  OD1 ASP X 366      40.970  38.220  54.556  0.00  0.00            
ATOM   2293  OD2 ASP X 366      43.105  38.312  53.978  0.00  0.00            
ATOM   2294  C   ASP X 366      43.364  34.176  54.803  0.00  0.00            
ATOM   2295  O   ASP X 366      44.584  34.176  55.039  0.00  0.00            
ATOM   2296  N   VAL X 367      42.561  33.101  55.023  0.00  0.00            
ATOM   2297  HN  VAL X 367      41.596  33.265  54.834  0.00  0.00            
ATOM   2298  CA  VAL X 367      42.900  31.730  55.398  0.00  0.00            
ATOM   2299  HA  VAL X 367      43.378  31.761  56.366  0.00  0.00            
ATOM   2300  CB  VAL X 367      41.621  30.830  55.355  0.00  0.00            
ATOM   2301  HB  VAL X 367      41.243  30.618  54.331  0.00  0.00            
ATOM   2302  CG1 VAL X 367      41.754  29.391  56.014  0.00  0.00            
ATOM   2303 HG11 VAL X 367      42.390  28.745  55.372  0.00  0.00            
ATOM   2304 HG12 VAL X 367      42.205  29.520  57.021  0.00  0.00            
ATOM   2305 HG13 VAL X 367      40.737  28.981  56.191  0.00  0.00            
ATOM   2306  CG2 VAL X 367      40.526  31.488  56.286  0.00  0.00            
ATOM   2307 HG21 VAL X 367      40.431  32.590  56.184  0.00  0.00            
ATOM   2308 HG22 VAL X 367      40.787  31.278  57.346  0.00  0.00            
ATOM   2309 HG23 VAL X 367      39.527  31.118  55.968  0.00  0.00            
ATOM   2310  C   VAL X 367      43.889  31.149  54.342  0.00  0.00            
ATOM   2311  O   VAL X 367      45.036  30.693  54.647  0.00  0.00            
ATOM   2312  N   LEU X 368      43.607  31.242  53.006  0.00  0.00            
ATOM   2313  HN  LEU X 368      42.750  31.651  52.702  0.00  0.00            
ATOM   2314  CA  LEU X 368      44.546  30.990  51.857  0.00  0.00            
ATOM   2315  HA  LEU X 368      44.828  29.948  51.844  0.00  0.00            
ATOM   2316  CB  LEU X 368      43.832  31.361  50.511  0.00  0.00            
ATOM   2317  HB1 LEU X 368      43.572  32.440  50.554  0.00  0.00            
ATOM   2318  HB2 LEU X 368      42.838  30.883  50.377  0.00  0.00            
ATOM   2319  CG  LEU X 368      44.697  31.125  49.251  0.00  0.00            
ATOM   2320  HG  LEU X 368      45.657  31.654  49.430  0.00  0.00            
ATOM   2321  CD1 LEU X 368      44.911  29.593  49.072  0.00  0.00            
ATOM   2322 HD11 LEU X 368      45.666  29.136  49.746  0.00  0.00            
ATOM   2323 HD12 LEU X 368      45.271  29.357  48.047  0.00  0.00            
ATOM   2324 HD13 LEU X 368      43.944  29.087  49.282  0.00  0.00            
ATOM   2325  CD2 LEU X 368      43.971  31.683  48.045  0.00  0.00            
ATOM   2326 HD21 LEU X 368      44.411  31.487  47.044  0.00  0.00            
ATOM   2327 HD22 LEU X 368      43.002  31.142  48.087  0.00  0.00            
ATOM   2328 HD23 LEU X 368      43.717  32.764  47.998  0.00  0.00            
ATOM   2329  C   LEU X 368      45.886  31.779  52.027  0.00  0.00            
ATOM   2330  O   LEU X 368      46.914  31.221  51.812  0.00  0.00            
ATOM   2331  N   ARG X 369      45.900  33.100  52.341  0.00  0.00            
ATOM   2332  HN  ARG X 369      45.095  33.664  52.507  0.00  0.00            
ATOM   2333  CA  ARG X 369      47.192  33.813  52.527  0.00  0.00            
ATOM   2334  HA  ARG X 369      47.866  33.650  51.698  0.00  0.00            
ATOM   2335  CB  ARG X 369      46.865  35.302  52.787  0.00  0.00            
ATOM   2336  HB1 ARG X 369      47.739  35.840  53.214  0.00  0.00            
ATOM   2337  HB2 ARG X 369      46.134  35.386  53.619  0.00  0.00            
ATOM   2338  CG  ARG X 369      46.276  36.101  51.546  0.00  0.00            
ATOM   2339  HG1 ARG X 369      45.437  35.506  51.127  0.00  0.00            
ATOM   2340  HG2 ARG X 369      47.124  36.173  50.832  0.00  0.00            
ATOM   2341  CD  ARG X 369      45.938  37.532  51.988  0.00  0.00            
ATOM   2342  HD1 ARG X 369      46.769  38.131  52.418  0.00  0.00            
ATOM   2343  HD2 ARG X 369      45.265  37.346  52.852  0.00  0.00            
ATOM   2344  NE  ARG X 369      45.435  38.272  50.795  0.00  0.00            
ATOM   2345  HE  ARG X 369      46.029  38.842  50.228  0.00  0.00            
ATOM   2346  CZ  ARG X 369      44.166  38.348  50.467  0.00  0.00            
ATOM   2347  NH1 ARG X 369      43.176  37.961  51.262  0.00  0.00            
ATOM   2348 HH11 ARG X 369      43.426  37.998  52.230  0.00  0.00            
ATOM   2349 HH12 ARG X 369      42.224  38.217  51.093  0.00  0.00            
ATOM   2350  NH2 ARG X 369      43.868  38.916  49.298  0.00  0.00            
ATOM   2351 HH21 ARG X 369      44.629  39.464  48.950  0.00  0.00            
ATOM   2352 HH22 ARG X 369      42.882  38.950  49.137  0.00  0.00            
ATOM   2353  C   ARG X 369      47.963  33.296  53.758  0.00  0.00            
ATOM   2354  O   ARG X 369      49.203  33.395  53.779  0.00  0.00            
ATOM   2355  N   ASN X 370      47.348  32.950  54.890  0.00  0.00            
ATOM   2356  HN  ASN X 370      46.369  33.081  55.025  0.00  0.00            
ATOM   2357  CA  ASN X 370      48.026  32.202  56.000  0.00  0.00            
ATOM   2358  HA  ASN X 370      48.843  32.845  56.290  0.00  0.00            
ATOM   2359  CB  ASN X 370      47.165  32.120  57.271  0.00  0.00            
ATOM   2360  HB1 ASN X 370      47.707  31.851  58.202  0.00  0.00            
ATOM   2361  HB2 ASN X 370      46.389  31.335  57.147  0.00  0.00            
ATOM   2362  CG  ASN X 370      46.505  33.466  57.618  0.00  0.00            
ATOM   2363  OD1 ASN X 370      45.306  33.422  57.837  0.00  0.00            
ATOM   2364  ND2 ASN X 370      47.292  34.569  57.550  0.00  0.00            
ATOM   2365 HD21 ASN X 370      48.220  34.425  57.208  0.00  0.00            
ATOM   2366 HD22 ASN X 370      46.910  35.436  57.870  0.00  0.00            
ATOM   2367  C   ASN X 370      48.599  30.797  55.673  0.00  0.00            
ATOM   2368  O   ASN X 370      49.761  30.575  56.035  0.00  0.00            
ATOM   2369  N   HSD X 371      47.820  29.918  54.998  0.00  0.00            
ATOM   2370  HN  HSD X 371      46.841  30.059  54.866  0.00  0.00            
ATOM   2371  CA  HSD X 371      48.255  28.678  54.418  0.00  0.00            
ATOM   2372  HA  HSD X 371      48.553  28.028  55.228  0.00  0.00            
ATOM   2373  CB  HSD X 371      47.044  27.988  53.804  0.00  0.00            
ATOM   2374  HB1 HSD X 371      46.613  28.688  53.057  0.00  0.00            
ATOM   2375  HB2 HSD X 371      46.251  27.794  54.558  0.00  0.00            
ATOM   2376  ND1 HSD X 371      47.817  25.635  53.589  0.00  0.00            
ATOM   2377  HD1 HSD X 371      47.691  25.316  54.529  0.00  0.00            
ATOM   2378  CG  HSD X 371      47.374  26.794  53.059  0.00  0.00            
ATOM   2379  CE1 HSD X 371      48.117  24.768  52.589  0.00  0.00            
ATOM   2380  HE1 HSD X 371      48.606  23.819  52.813  0.00  0.00            
ATOM   2381  NE2 HSD X 371      47.908  25.341  51.424  0.00  0.00            
ATOM   2382  CD2 HSD X 371      47.367  26.649  51.696  0.00  0.00            
ATOM   2383  HD2 HSD X 371      47.296  27.462  50.984  0.00  0.00            
ATOM   2384  C   HSD X 371      49.457  28.872  53.535  0.00  0.00            
ATOM   2385  O   HSD X 371      50.428  28.149  53.657  0.00  0.00            
ATOM   2386  N   LEU X 372      49.405  29.812  52.579  0.00  0.00            
ATOM   2387  HN  LEU X 372      48.576  30.352  52.456  0.00  0.00            
ATOM   2388  CA  LEU X 372      50.560  30.162  51.826  0.00  0.00            
ATOM   2389  HA  LEU X 372      50.813  29.222  51.359  0.00  0.00            
ATOM   2390  CB  LEU X 372      50.262  31.177  50.648  0.00  0.00            
ATOM   2391  HB1 LEU X 372      51.239  31.337  50.144  0.00  0.00            
ATOM   2392  HB2 LEU X 372      49.985  32.204  50.969  0.00  0.00            
ATOM   2393  CG  LEU X 372      49.337  30.620  49.504  0.00  0.00            
ATOM   2394  HG  LEU X 372      48.390  30.401  50.042  0.00  0.00            
ATOM   2395  CD1 LEU X 372      49.024  31.633  48.477  0.00  0.00            
ATOM   2396 HD11 LEU X 372      49.866  31.903  47.803  0.00  0.00            
ATOM   2397 HD12 LEU X 372      48.538  32.570  48.822  0.00  0.00            
ATOM   2398 HD13 LEU X 372      48.259  31.222  47.783  0.00  0.00            
ATOM   2399  CD2 LEU X 372      49.838  29.273  48.909  0.00  0.00            
ATOM   2400 HD21 LEU X 372      49.909  28.551  49.751  0.00  0.00            
ATOM   2401 HD22 LEU X 372      49.153  28.834  48.152  0.00  0.00            
ATOM   2402 HD23 LEU X 372      50.786  29.328  48.333  0.00  0.00            
ATOM   2403  C   LEU X 372      51.746  30.622  52.645  0.00  0.00            
ATOM   2404  O   LEU X 372      52.876  30.118  52.514  0.00  0.00            
ATOM   2405  N   LYS X 373      51.588  31.515  53.648  0.00  0.00            
ATOM   2406  HN  LYS X 373      50.656  31.787  53.874  0.00  0.00            
ATOM   2407  CA  LYS X 373      52.663  32.167  54.364  0.00  0.00            
ATOM   2408  HA  LYS X 373      53.359  32.531  53.622  0.00  0.00            
ATOM   2409  CB  LYS X 373      52.097  33.357  55.137  0.00  0.00            
ATOM   2410  HB1 LYS X 373      51.348  33.128  55.924  0.00  0.00            
ATOM   2411  HB2 LYS X 373      51.634  33.982  54.343  0.00  0.00            
ATOM   2412  CG  LYS X 373      53.187  34.237  55.777  0.00  0.00            
ATOM   2413  HG1 LYS X 373      53.516  33.742  56.716  0.00  0.00            
ATOM   2414  HG2 LYS X 373      52.668  35.128  56.191  0.00  0.00            
ATOM   2415  CD  LYS X 373      54.431  34.686  54.931  0.00  0.00            
ATOM   2416  HD1 LYS X 373      54.093  35.349  54.106  0.00  0.00            
ATOM   2417  HD2 LYS X 373      54.917  33.804  54.462  0.00  0.00            
ATOM   2418  CE  LYS X 373      55.434  35.432  55.656  0.00  0.00            
ATOM   2419  HE1 LYS X 373      54.971  36.086  56.426  0.00  0.00            
ATOM   2420  HE2 LYS X 373      56.108  36.001  54.981  0.00  0.00            
ATOM   2421  NZ  LYS X 373      56.315  34.535  56.454  0.00  0.00            
ATOM   2422  HZ1 LYS X 373      55.671  33.933  57.005  0.00  0.00            
ATOM   2423  HZ2 LYS X 373      56.971  35.028  57.094  0.00  0.00            
ATOM   2424  HZ3 LYS X 373      56.938  33.918  55.896  0.00  0.00            
ATOM   2425  C   LYS X 373      53.378  31.189  55.322  0.00  0.00            
ATOM   2426  O   LYS X 373      54.557  31.189  55.317  0.00  0.00            
ATOM   2427  N   GLN X 374      52.666  30.328  56.018  0.00  0.00            
ATOM   2428  HN  GLN X 374      51.681  30.466  55.952  0.00  0.00            
ATOM   2429  CA  GLN X 374      53.125  29.358  56.936  0.00  0.00            
ATOM   2430  HA  GLN X 374      54.037  29.701  57.402  0.00  0.00            
ATOM   2431  CB  GLN X 374      52.069  29.141  58.070  0.00  0.00            
ATOM   2432  HB1 GLN X 374      52.435  28.392  58.805  0.00  0.00            
ATOM   2433  HB2 GLN X 374      51.126  28.713  57.667  0.00  0.00            
ATOM   2434  CG  GLN X 374      51.582  30.372  58.819  0.00  0.00            
ATOM   2435  HG1 GLN X 374      50.722  30.168  59.492  0.00  0.00            
ATOM   2436  HG2 GLN X 374      51.087  31.010  58.057  0.00  0.00            
ATOM   2437  CD  GLN X 374      52.725  31.025  59.635  0.00  0.00            
ATOM   2438  OE1 GLN X 374      53.552  30.289  60.217  0.00  0.00            
ATOM   2439  NE2 GLN X 374      52.797  32.332  59.682  0.00  0.00            
ATOM   2440 HE21 GLN X 374      53.343  32.788  60.384  0.00  0.00            
ATOM   2441 HE22 GLN X 374      52.058  32.741  59.148  0.00  0.00            
ATOM   2442  C   GLN X 374      53.522  28.039  56.278  0.00  0.00            
ATOM   2443  O   GLN X 374      53.997  27.174  57.004  0.00  0.00            
ATOM   2444  N   SER X 375      53.340  27.755  54.982  0.00  0.00            
ATOM   2445  HN  SER X 375      52.910  28.363  54.319  0.00  0.00            
ATOM   2446  CA  SER X 375      53.830  26.462  54.483  0.00  0.00            
ATOM   2447  HA  SER X 375      53.804  25.643  55.187  0.00  0.00            
ATOM   2448  CB  SER X 375      52.868  25.843  53.341  0.00  0.00            
ATOM   2449  HB1 SER X 375      51.968  25.348  53.762  0.00  0.00            
ATOM   2450  HB2 SER X 375      53.429  25.119  52.712  0.00  0.00            
ATOM   2451  OG  SER X 375      52.353  26.770  52.406  0.00  0.00            
ATOM   2452  HG1 SER X 375      51.593  27.208  52.794  0.00  0.00            
ATOM   2453  C   SER X 375      55.213  26.610  53.842  0.00  0.00            
ATOM   2454  O   SER X 375      55.786  25.626  53.403  0.00  0.00            
ATOM   2455  N   MET X 376      55.693  27.805  53.753  0.00  0.00            
ATOM   2456  HN  MET X 376      55.327  28.622  54.192  0.00  0.00            
ATOM   2457  CA  MET X 376      56.975  27.899  53.096  0.00  0.00            
ATOM   2458  HA  MET X 376      57.279  27.000  52.580  0.00  0.00            
ATOM   2459  CB  MET X 376      56.763  28.989  51.996  0.00  0.00            
ATOM   2460  HB1 MET X 376      57.661  29.434  51.516  0.00  0.00            
ATOM   2461  HB2 MET X 376      56.218  29.881  52.375  0.00  0.00            
ATOM   2462  CG  MET X 376      55.973  28.435  50.777  0.00  0.00            
ATOM   2463  HG1 MET X 376      55.247  27.697  51.181  0.00  0.00            
ATOM   2464  HG2 MET X 376      56.592  27.955  49.989  0.00  0.00            
ATOM   2465  SD  MET X 376      55.028  29.647  49.854  0.00  0.00            
ATOM   2466  CE  MET X 376      53.759  28.582  49.216  0.00  0.00            
ATOM   2467  HE1 MET X 376      52.930  29.047  48.640  0.00  0.00            
ATOM   2468  HE2 MET X 376      54.164  27.780  48.563  0.00  0.00            
ATOM   2469  HE3 MET X 376      53.246  28.139  50.096  0.00  0.00            
ATOM   2470  C   MET X 376      58.033  28.451  54.149  0.00  0.00            
ATOM   2471  OT1 MET X 376      59.087  27.822  54.378  0.00  0.00            
ATOM   2472  OT2 MET X 376      57.919  29.586  54.706  0.00  0.00            
ATOM   2473  O5' GTP X 400      34.222  34.114  36.949  0.00  0.00            
ATOM   2474  C5' GTP X 400      33.276  33.057  36.653  0.00  0.00            
ATOM   2475  H51 GTP X 400      33.545  32.047  37.031  0.00  0.00            
ATOM   2476  H52 GTP X 400      33.202  32.917  35.554  0.00  0.00            
ATOM   2477  C4' GTP X 400      31.880  33.399  37.092  0.00  0.00            
ATOM   2478  H4' GTP X 400      31.083  32.971  36.447  0.00  0.00            
ATOM   2479  O4' GTP X 400      31.746  32.879  38.508  0.00  0.00            
ATOM   2480  C1' GTP X 400      31.503  33.975  39.460  0.00  0.00            
ATOM   2481  H1' GTP X 400      30.430  34.072  39.728  0.00  0.00            
ATOM   2482  N9  GTP X 400      32.277  33.761  40.713  0.00  0.00            
ATOM   2483  C5  GTP X 400      32.772  33.320  42.787  0.00  0.00            
ATOM   2484  N7  GTP X 400      33.996  33.531  42.129  0.00  0.00            
ATOM   2485  C8  GTP X 400      33.638  33.825  40.933  0.00  0.00            
ATOM   2486  H8  GTP X 400      34.331  33.930  40.099  0.00  0.00            
ATOM   2487  N1  GTP X 400      31.106  33.190  44.384  0.00  0.00            
ATOM   2488  H1  GTP X 400      30.769  33.103  45.332  0.00  0.00            
ATOM   2489  C2  GTP X 400      30.113  33.182  43.433  0.00  0.00            
ATOM   2490  N2  GTP X 400      28.875  33.013  43.835  0.00  0.00            
ATOM   2491  H21 GTP X 400      28.614  33.014  44.800  0.00  0.00            
ATOM   2492  H22 GTP X 400      28.219  32.964  43.082  0.00  0.00            
ATOM   2493  N3  GTP X 400      30.390  33.290  42.149  0.00  0.00            
ATOM   2494  C4  GTP X 400      31.736  33.414  41.883  0.00  0.00            
ATOM   2495  C6  GTP X 400      32.436  33.279  44.104  0.00  0.00            
ATOM   2496  O6  GTP X 400      33.251  33.276  45.026  0.00  0.00            
ATOM   2497  C2' GTP X 400      31.909  35.270  38.692  0.00  0.00            
ATOM   2498  H2' GTP X 400      32.989  35.523  38.615  0.00  0.00            
ATOM   2499  O2' GTP X 400      31.223  36.401  39.224  0.00  0.00            
ATOM   2500  H2T GTP X 400      30.285  36.211  39.139  0.00  0.00            
ATOM   2501  C3' GTP X 400      31.502  34.925  37.230  0.00  0.00            
ATOM   2502  H3' GTP X 400      32.166  35.534  36.580  0.00  0.00            
ATOM   2503  O3' GTP X 400      30.134  35.179  37.004  0.00  0.00            
ATOM   2504  H3T GTP X 400      30.077  36.115  36.800  0.00  0.00            
ATOM   2505  PA  GTP X 400      35.677  34.107  36.433  0.00  0.00            
ATOM   2506  O1A GTP X 400      35.778  34.831  35.099  0.00  0.00            
ATOM   2507  O2A GTP X 400      36.637  34.610  37.458  0.00  0.00            
ATOM   2508  O3A GTP X 400      35.899  32.663  36.167  0.00  0.00            
ATOM   2509  PB  GTP X 400      37.143  31.951  35.453  0.00  0.00            
ATOM   2510  O1B GTP X 400      38.250  32.991  35.319  0.00  0.00            
ATOM   2511  O2B GTP X 400      37.276  30.594  36.149  0.00  0.00            
ATOM   2512  O3B GTP X 400      36.643  31.790  33.969  0.00  0.00            
ATOM   2513  PG  GTP X 400      37.215  31.281  32.612  0.00  0.00            
ATOM   2514  O1G GTP X 400      38.332  32.219  32.378  0.00  0.00            
ATOM   2515  O2G GTP X 400      37.457  29.919  33.088  0.00  0.00            
ATOM   2516  O3G GTP X 400      35.954  31.480  31.795  0.00  0.00            
ATOM   2517  MG  MG  X 401      39.396  33.441  33.583  0.00  0.00            
END
