# Supplementary material for: Evolution of cation binding in the active sites of P-loop nucleoside triphosphatases in relation to the basic catalytic mechanism
Source: eLife journal article supplement (doi:10.7554/elife.37373), 2018-12-11
Supplement: supp [file elife-37373-supp-v1.zip › elife_poa_e37373_Figures_2_source_data_1.txt]

CRYST1   29.911   29.911   39.881  90.00  90.00  90.00 P 1           1
ATOM      1  C4' ATP X   1      15.131  10.329  23.102  0.00  0.00            
ATOM      2  H4' ATP X   1      14.730  10.206  24.119  0.00  0.00            
ATOM      3  O4' ATP X   1      14.037   9.902  22.260  0.00  0.00            
ATOM      4  C1' ATP X   1      14.479   8.955  21.290  0.00  0.00            
ATOM      5  H1' ATP X   1      14.114   7.939  21.499  0.00  0.00            
ATOM      6  C5  ATP X   1      13.193   9.325  17.838  0.00  0.00            
ATOM      7  N7  ATP X   1      13.312  10.630  18.208  0.00  0.00            
ATOM      8  C8  ATP X   1      13.737  10.612  19.448  0.00  0.00            
ATOM      9  H8  ATP X   1      13.950  11.433  20.132  0.00  0.00            
ATOM     10  N9  ATP X   1      13.997   9.353  19.961  0.00  0.00            
ATOM     11  N1  ATP X   1      12.934   7.317  16.529  0.00  0.00            
ATOM     12  C2  ATP X   1      13.289   6.613  17.632  0.00  0.00            
ATOM     13  H2  ATP X   1      13.467   5.540  17.569  0.00  0.00            
ATOM     14  N3  ATP X   1      13.631   7.127  18.872  0.00  0.00            
ATOM     15  C4  ATP X   1      13.512   8.486  18.911  0.00  0.00            
ATOM     16  C6  ATP X   1      12.828   8.665  16.587  0.00  0.00            
ATOM     17  N6  ATP X   1      12.132   9.218  15.609  0.00  0.00            
ATOM     18  H61 ATP X   1      11.577   8.692  14.965  0.00  0.00            
ATOM     19  H62 ATP X   1      11.642  10.075  15.774  0.00  0.00            
ATOM     20  C2' ATP X   1      16.020   8.930  21.328  0.00  0.00            
ATOM     21  H2' ATP X   1      16.504   9.702  20.711  0.00  0.00            
ATOM     22  O2' ATP X   1      16.579   7.701  21.042  0.00  0.00            
ATOM     23  H2T ATP X   1      16.116   7.196  21.715  0.00  0.00            
ATOM     24  C3' ATP X   1      16.332   9.335  22.843  0.00  0.00            
ATOM     25  H3' ATP X   1      17.288   9.880  22.830  0.00  0.00            
ATOM     26  O3' ATP X   1      16.394   8.288  23.795  0.00  0.00            
ATOM     27  H3T ATP X   1      17.290   7.942  23.795  0.00  0.00            
ATOM     28  C5' ATP X   1      15.416  11.796  22.953  0.00  0.00            
ATOM     29  H51 ATP X   1      16.417  11.995  23.390  0.00  0.00            
ATOM     30  H52 ATP X   1      14.588  12.210  23.567  0.00  0.00            
ATOM     31  O5' ATP X   1      15.316  12.282  21.633  0.00  0.00            
ATOM     32  PA  ATP X   1      16.148  13.543  21.117  0.00  0.00            
ATOM     33  O1A ATP X   1      16.144  13.468  19.595  0.00  0.00            
ATOM     34  O2A ATP X   1      15.611  14.769  21.780  0.00  0.00            
ATOM     35  O3A ATP X   1      17.706  13.487  21.607  0.00  0.00            
ATOM     36  PB  ATP X   1      18.549  14.038  22.892  0.00  0.00            
ATOM     37  O1B ATP X   1      17.640  13.923  24.123  0.00  0.00            
ATOM     38  O2B ATP X   1      19.832  13.322  23.043  0.00  0.00            
ATOM     39  O3B ATP X   1      18.777  15.549  22.568  0.00  0.00            
ATOM     40  PG  ATP X   1      18.805  16.883  23.523  0.00  0.00            
ATOM     41  O1G ATP X   1      20.076  16.916  24.129  0.00  0.00            
ATOM     42  O2G ATP X   1      17.629  16.656  24.403  0.00  0.00            
ATOM     43  O3G ATP X   1      18.669  17.937  22.442  0.00  0.00            
ATOM     44  Mg  MG  X   2      16.750  15.269  25.483  0.00  0.00            
ATOM     45  K   K   X1196      29.138   1.086  13.631  0.00  0.00            
ATOM     46  K   K   X1197      21.523  15.541  22.390  0.00  0.00            
ATOM     47  K   K   X1198      13.691  10.212  32.491  0.00  0.00            
ATOM     48  K   K   X1199       1.240  -2.562  21.269  0.00  0.00            
ATOM     49  K   K   X1200      16.558  17.168  21.252  0.00  0.00            
ATOM     50  K   K   X1201      17.590   6.304  18.677  0.00  0.00            
ATOM     51  CL  CL  X1202      14.823   1.537  39.912  0.00  0.00            
ATOM     52  CL  CL  X1203      21.880  -9.548  30.387  0.00  0.00            
ATOM     53  CL  CL  X1204      40.853   4.571  22.150  0.00  0.00            
ATOM     54  CL  CL  X1205      31.230  15.263  27.391  0.00  0.00            
ATOM     55  OW  HOH X   3      25.635  -5.112  23.318  0.00  0.00            
ATOM     56  HW1 HOH X   3      26.250  -5.821  23.506  0.00  0.00            
ATOM     57  HW2 HOH X   3      26.134  -4.312  23.484  0.00  0.00            
ATOM     58  OW  HOH X   4      14.728  -5.027  13.269  0.00  0.00            
ATOM     59  HW1 HOH X   4      15.028  -4.624  12.454  0.00  0.00            
ATOM     60  HW2 HOH X   4      15.202  -4.560  13.957  0.00  0.00            
ATOM     61  OW  HOH X   5      31.734  18.059  19.873  0.00  0.00            
ATOM     62  HW1 HOH X   5      31.394  18.235  18.996  0.00  0.00            
ATOM     63  HW2 HOH X   5      32.120  18.889  20.152  0.00  0.00            
ATOM     64  OW  HOH X   6       4.280   9.219  32.326  0.00  0.00            
ATOM     65  HW1 HOH X   6       3.941   9.344  31.440  0.00  0.00            
ATOM     66  HW2 HOH X   6       5.191   9.508  32.278  0.00  0.00            
ATOM     67  OW  HOH X   7      31.024  26.030  17.314  0.00  0.00            
ATOM     68  HW1 HOH X   7      31.452  26.702  16.782  0.00  0.00            
ATOM     69  HW2 HOH X   7      31.736  25.631  17.814  0.00  0.00            
ATOM     70  OW  HOH X   8      32.788  18.734  16.166  0.00  0.00            
ATOM     71  HW1 HOH X   8      33.667  18.640  16.533  0.00  0.00            
ATOM     72  HW2 HOH X   8      32.931  18.847  15.227  0.00  0.00            
ATOM     73  OW  HOH X   9      33.932  21.760  19.093  0.00  0.00            
ATOM     74  HW1 HOH X   9      34.293  22.349  19.755  0.00  0.00            
ATOM     75  HW2 HOH X   9      33.394  22.325  18.538  0.00  0.00            
ATOM     76  OW  HOH X  10      22.558   9.564  31.818  0.00  0.00            
ATOM     77  HW1 HOH X  10      21.931   8.997  32.267  0.00  0.00            
ATOM     78  HW2 HOH X  10      23.394   9.384  32.248  0.00  0.00            
ATOM     79  OW  HOH X  11      38.449   7.773  30.610  0.00  0.00            
ATOM     80  HW1 HOH X  11      39.261   8.087  30.212  0.00  0.00            
ATOM     81  HW2 HOH X  11      37.755   8.204  30.112  0.00  0.00            
ATOM     82  OW  HOH X  12      19.875  23.581  36.804  0.00  0.00            
ATOM     83  HW1 HOH X  12      20.264  22.942  37.401  0.00  0.00            
ATOM     84  HW2 HOH X  12      20.414  24.365  36.907  0.00  0.00            
ATOM     85  OW  HOH X  13      23.225  19.460  25.356  0.00  0.00            
ATOM     86  HW1 HOH X  13      22.310  19.321  25.112  0.00  0.00            
ATOM     87  HW2 HOH X  13      23.461  20.290  24.942  0.00  0.00            
ATOM     88  OW  HOH X  14      22.975  -4.998  21.121  0.00  0.00            
ATOM     89  HW1 HOH X  14      22.120  -5.076  20.698  0.00  0.00            
ATOM     90  HW2 HOH X  14      23.092  -4.057  21.253  0.00  0.00            
ATOM     91  OW  HOH X  15      36.411  10.171  30.713  0.00  0.00            
ATOM     92  HW1 HOH X  15      37.216  10.368  31.192  0.00  0.00            
ATOM     93  HW2 HOH X  15      35.708  10.389  31.325  0.00  0.00            
ATOM     94  OW  HOH X  16       1.351  22.035  16.472  0.00  0.00            
ATOM     95  HW1 HOH X  16       0.596  22.449  16.054  0.00  0.00            
ATOM     96  HW2 HOH X  16       0.972  21.468  17.144  0.00  0.00            
ATOM     97  OW  HOH X  17      10.941   4.506   2.820  0.00  0.00            
ATOM     98  HW1 HOH X  17      10.566   4.682   1.957  0.00  0.00            
ATOM     99  HW2 HOH X  17      11.720   3.979   2.641  0.00  0.00            
ATOM    100  OW  HOH X  18      35.157   8.176  23.753  0.00  0.00            
ATOM    101  HW1 HOH X  18      35.247   9.042  23.354  0.00  0.00            
ATOM    102  HW2 HOH X  18      35.771   8.185  24.486  0.00  0.00            
ATOM    103  OW  HOH X  19      27.850  17.107  13.004  0.00  0.00            
ATOM    104  HW1 HOH X  19      28.338  16.299  13.160  0.00  0.00            
ATOM    105  HW2 HOH X  19      27.040  16.821  12.581  0.00  0.00            
ATOM    106  OW  HOH X  20      -3.498  14.605  20.438  0.00  0.00            
ATOM    107  HW1 HOH X  20      -3.470  14.804  19.502  0.00  0.00            
ATOM    108  HW2 HOH X  20      -2.736  15.054  20.802  0.00  0.00            
ATOM    109  OW  HOH X  21      27.295  14.598  32.526  0.00  0.00            
ATOM    110  HW1 HOH X  21      27.737  14.365  33.342  0.00  0.00            
ATOM    111  HW2 HOH X  21      26.368  14.428  32.697  0.00  0.00            
ATOM    112  OW  HOH X  22      12.563  12.046  31.070  0.00  0.00            
ATOM    113  HW1 HOH X  22      12.853  12.941  31.246  0.00  0.00            
ATOM    114  HW2 HOH X  22      12.379  12.033  30.131  0.00  0.00            
ATOM    115  OW  HOH X  23       5.899   8.752  26.037  0.00  0.00            
ATOM    116  HW1 HOH X  23       6.155   9.346  26.743  0.00  0.00            
ATOM    117  HW2 HOH X  23       6.726   8.495  25.629  0.00  0.00            
ATOM    118  OW  HOH X  24      11.170  17.009  18.297  0.00  0.00            
ATOM    119  HW1 HOH X  24      10.493  16.348  18.148  0.00  0.00            
ATOM    120  HW2 HOH X  24      11.511  17.204  17.425  0.00  0.00            
ATOM    121  OW  HOH X  25      26.013  14.605   9.702  0.00  0.00            
ATOM    122  HW1 HOH X  25      26.550  14.610   8.910  0.00  0.00            
ATOM    123  HW2 HOH X  25      25.114  14.532   9.381  0.00  0.00            
ATOM    124  OW  HOH X  26      28.644  24.776  16.748  0.00  0.00            
ATOM    125  HW1 HOH X  26      29.535  25.084  16.914  0.00  0.00            
ATOM    126  HW2 HOH X  26      28.755  24.016  16.177  0.00  0.00            
ATOM    127  OW  HOH X  27      19.892   4.399   9.048  0.00  0.00            
ATOM    128  HW1 HOH X  27      20.552   4.783   9.625  0.00  0.00            
ATOM    129  HW2 HOH X  27      19.820   5.019   8.322  0.00  0.00            
ATOM    130  OW  HOH X  28      39.557   3.947  28.414  0.00  0.00            
ATOM    131  HW1 HOH X  28      40.439   3.973  28.785  0.00  0.00            
ATOM    132  HW2 HOH X  28      39.650   4.341  27.546  0.00  0.00            
ATOM    133  OW  HOH X  29      37.732  10.337  20.408  0.00  0.00            
ATOM    134  HW1 HOH X  29      37.068  10.834  19.930  0.00  0.00            
ATOM    135  HW2 HOH X  29      38.088   9.728  19.761  0.00  0.00            
ATOM    136  OW  HOH X  30      17.003  -0.271  12.221  0.00  0.00            
ATOM    137  HW1 HOH X  30      16.058  -0.168  12.330  0.00  0.00            
ATOM    138  HW2 HOH X  30      17.114  -0.511  11.301  0.00  0.00            
ATOM    139  OW  HOH X  31      12.137   1.252  29.647  0.00  0.00            
ATOM    140  HW1 HOH X  31      11.489   1.023  28.981  0.00  0.00            
ATOM    141  HW2 HOH X  31      11.980   0.631  30.358  0.00  0.00            
ATOM    142  OW  HOH X  32      22.862  -5.055  24.120  0.00  0.00            
ATOM    143  HW1 HOH X  32      22.258  -5.242  23.401  0.00  0.00            
ATOM    144  HW2 HOH X  32      23.712  -4.937  23.696  0.00  0.00            
ATOM    145  OW  HOH X  33       1.408  11.064  18.808  0.00  0.00            
ATOM    146  HW1 HOH X  33       2.324  11.113  18.536  0.00  0.00            
ATOM    147  HW2 HOH X  33       1.304  10.172  19.139  0.00  0.00            
ATOM    148  OW  HOH X  34      -0.409  15.658  10.805  0.00  0.00            
ATOM    149  HW1 HOH X  34      -0.348  14.808  11.240  0.00  0.00            
ATOM    150  HW2 HOH X  34      -1.348  15.807  10.700  0.00  0.00            
ATOM    151  OW  HOH X  35      23.397  13.432  21.540  0.00  0.00            
ATOM    152  HW1 HOH X  35      23.963  13.711  22.261  0.00  0.00            
ATOM    153  HW2 HOH X  35      23.871  13.691  20.750  0.00  0.00            
ATOM    154  OW  HOH X  36      31.327  24.260  20.313  0.00  0.00            
ATOM    155  HW1 HOH X  36      31.910  24.250  19.554  0.00  0.00            
ATOM    156  HW2 HOH X  36      30.472  24.009  19.963  0.00  0.00            
ATOM    157  OW  HOH X  37       2.334  22.219  19.973  0.00  0.00            
ATOM    158  HW1 HOH X  37       1.791  22.891  20.383  0.00  0.00            
ATOM    159  HW2 HOH X  37       3.002  22.017  20.628  0.00  0.00            
ATOM    160  OW  HOH X  38      17.823   7.035  34.968  0.00  0.00            
ATOM    161  HW1 HOH X  38      18.524   7.406  35.505  0.00  0.00            
ATOM    162  HW2 HOH X  38      18.125   6.152  34.755  0.00  0.00            
ATOM    163  OW  HOH X  39      21.065  12.397  18.072  0.00  0.00            
ATOM    164  HW1 HOH X  39      20.662  13.130  18.537  0.00  0.00            
ATOM    165  HW2 HOH X  39      20.717  11.617  18.506  0.00  0.00            
ATOM    166  OW  HOH X  40      -5.961  13.845  21.260  0.00  0.00            
ATOM    167  HW1 HOH X  40      -6.556  14.186  20.593  0.00  0.00            
ATOM    168  HW2 HOH X  40      -5.086  14.001  20.903  0.00  0.00            
ATOM    169  OW  HOH X  41      -2.760   3.344  21.579  0.00  0.00            
ATOM    170  HW1 HOH X  41      -3.364   2.651  21.849  0.00  0.00            
ATOM    171  HW2 HOH X  41      -2.443   3.719  22.401  0.00  0.00            
ATOM    172  OW  HOH X  42      12.278  19.368  15.796  0.00  0.00            
ATOM    173  HW1 HOH X  42      11.342  19.242  15.955  0.00  0.00            
ATOM    174  HW2 HOH X  42      12.686  19.242  16.652  0.00  0.00            
ATOM    175  OW  HOH X  43       7.051  19.230  25.976  0.00  0.00            
ATOM    176  HW1 HOH X  43       7.200  20.166  25.840  0.00  0.00            
ATOM    177  HW2 HOH X  43       6.484  19.187  26.746  0.00  0.00            
ATOM    178  OW  HOH X  44      10.375   9.398  38.170  0.00  0.00            
ATOM    179  HW1 HOH X  44       9.703   9.030  38.744  0.00  0.00            
ATOM    180  HW2 HOH X  44      10.387   8.815  37.411  0.00  0.00            
ATOM    181  OW  HOH X  45      17.989   9.784   1.404  0.00  0.00            
ATOM    182  HW1 HOH X  45      17.546   9.472   0.615  0.00  0.00            
ATOM    183  HW2 HOH X  45      17.446  10.508   1.714  0.00  0.00            
ATOM    184  OW  HOH X  46      10.403  12.113  37.057  0.00  0.00            
ATOM    185  HW1 HOH X  46      11.223  12.144  36.566  0.00  0.00            
ATOM    186  HW2 HOH X  46      10.317  11.197  37.323  0.00  0.00            
ATOM    187  OW  HOH X  47      -5.763   8.849  23.426  0.00  0.00            
ATOM    188  HW1 HOH X  47      -5.861   9.684  22.968  0.00  0.00            
ATOM    189  HW2 HOH X  47      -4.861   8.857  23.747  0.00  0.00            
ATOM    190  OW  HOH X  48      31.529   6.941  24.597  0.00  0.00            
ATOM    191  HW1 HOH X  48      31.953   6.083  24.607  0.00  0.00            
ATOM    192  HW2 HOH X  48      30.852   6.882  25.271  0.00  0.00            
ATOM    193  OW  HOH X  49      23.985   0.459  28.184  0.00  0.00            
ATOM    194  HW1 HOH X  49      23.779   0.251  29.096  0.00  0.00            
ATOM    195  HW2 HOH X  49      24.307  -0.365  27.818  0.00  0.00            
ATOM    196  OW  HOH X  50      -0.897   7.127  24.511  0.00  0.00            
ATOM    197  HW1 HOH X  50      -0.300   7.612  23.942  0.00  0.00            
ATOM    198  HW2 HOH X  50      -0.423   7.043  25.339  0.00  0.00            
ATOM    199  OW  HOH X  51      17.684  10.315  11.855  0.00  0.00            
ATOM    200  HW1 HOH X  51      18.219   9.680  11.380  0.00  0.00            
ATOM    201  HW2 HOH X  51      16.918  10.449  11.297  0.00  0.00            
ATOM    202  OW  HOH X  52      20.427  29.623  17.580  0.00  0.00            
ATOM    203  HW1 HOH X  52      20.646  28.767  17.213  0.00  0.00            
ATOM    204  HW2 HOH X  52      20.819  30.251  16.973  0.00  0.00            
ATOM    205  OW  HOH X  53      -3.440  18.601  19.347  0.00  0.00            
ATOM    206  HW1 HOH X  53      -3.139  18.313  18.486  0.00  0.00            
ATOM    207  HW2 HOH X  53      -3.239  19.537  19.371  0.00  0.00            
ATOM    208  OW  HOH X  54      28.842  17.618  36.043  0.00  0.00            
ATOM    209  HW1 HOH X  54      29.650  18.085  35.830  0.00  0.00            
ATOM    210  HW2 HOH X  54      29.081  17.044  36.771  0.00  0.00            
ATOM    211  OW  HOH X  55      17.899  21.326  20.245  0.00  0.00            
ATOM    212  HW1 HOH X  55      17.081  21.752  19.990  0.00  0.00            
ATOM    213  HW2 HOH X  55      18.586  21.903  19.910  0.00  0.00            
ATOM    214  OW  HOH X  56      21.689  12.243   4.341  0.00  0.00            
ATOM    215  HW1 HOH X  56      21.797  13.000   3.764  0.00  0.00            
ATOM    216  HW2 HOH X  56      20.850  11.862   4.082  0.00  0.00            
ATOM    217  OW  HOH X  57       4.561   0.469  11.875  0.00  0.00            
ATOM    218  HW1 HOH X  57       5.194   0.253  12.559  0.00  0.00            
ATOM    219  HW2 HOH X  57       4.662   1.412  11.744  0.00  0.00            
ATOM    220  OW  HOH X  58       5.184   2.554  30.710  0.00  0.00            
ATOM    221  HW1 HOH X  58       5.768   2.082  31.304  0.00  0.00            
ATOM    222  HW2 HOH X  58       4.714   3.169  31.273  0.00  0.00            
ATOM    223  OW  HOH X  59       0.747   6.904   3.809  0.00  0.00            
ATOM    224  HW1 HOH X  59       1.457   7.475   4.104  0.00  0.00            
ATOM    225  HW2 HOH X  59      -0.052   7.389   4.014  0.00  0.00            
ATOM    226  OW  HOH X  60      31.726  27.004  14.031  0.00  0.00            
ATOM    227  HW1 HOH X  60      32.637  26.827  13.796  0.00  0.00            
ATOM    228  HW2 HOH X  60      31.782  27.546  14.818  0.00  0.00            
ATOM    229  OW  HOH X  61      30.168   2.056  26.441  0.00  0.00            
ATOM    230  HW1 HOH X  61      30.247   1.925  25.496  0.00  0.00            
ATOM    231  HW2 HOH X  61      31.067   2.185  26.742  0.00  0.00            
ATOM    232  OW  HOH X  62      17.674  -4.057  19.073  0.00  0.00            
ATOM    233  HW1 HOH X  62      18.482  -3.881  18.591  0.00  0.00            
ATOM    234  HW2 HOH X  62      17.871  -3.797  19.973  0.00  0.00            
ATOM    235  OW  HOH X  63      25.100   9.056  33.399  0.00  0.00            
ATOM    236  HW1 HOH X  63      25.649   9.135  32.619  0.00  0.00            
ATOM    237  HW2 HOH X  63      25.522   8.374  33.921  0.00  0.00            
ATOM    238  OW  HOH X  64      32.131  21.736   8.019  0.00  0.00            
ATOM    239  HW1 HOH X  64      32.827  21.741   7.361  0.00  0.00            
ATOM    240  HW2 HOH X  64      32.342  22.470   8.597  0.00  0.00            
ATOM    241  OW  HOH X  65      16.336  -4.346  25.616  0.00  0.00            
ATOM    242  HW1 HOH X  65      16.136  -5.205  25.990  0.00  0.00            
ATOM    243  HW2 HOH X  65      16.560  -4.528  24.704  0.00  0.00            
ATOM    244  OW  HOH X  66      21.916  28.578  28.943  0.00  0.00            
ATOM    245  HW1 HOH X  66      22.611  29.221  29.083  0.00  0.00            
ATOM    246  HW2 HOH X  66      21.387  28.618  29.740  0.00  0.00            
ATOM    247  OW  HOH X  67       6.146  -8.126  19.310  0.00  0.00            
ATOM    248  HW1 HOH X  67       6.059  -8.146  18.357  0.00  0.00            
ATOM    249  HW2 HOH X  67       6.918  -7.584  19.469  0.00  0.00            
ATOM    250  OW  HOH X  68      18.540  13.776   5.591  0.00  0.00            
ATOM    251  HW1 HOH X  68      18.047  12.961   5.690  0.00  0.00            
ATOM    252  HW2 HOH X  68      18.723  13.833   4.653  0.00  0.00            
ATOM    253  OW  HOH X  69      15.381  27.825  26.067  0.00  0.00            
ATOM    254  HW1 HOH X  69      15.210  27.727  25.130  0.00  0.00            
ATOM    255  HW2 HOH X  69      15.429  28.771  26.205  0.00  0.00            
ATOM    256  OW  HOH X  70      36.525  16.827  19.873  0.00  0.00            
ATOM    257  HW1 HOH X  70      37.408  16.658  19.544  0.00  0.00            
ATOM    258  HW2 HOH X  70      36.332  16.078  20.437  0.00  0.00            
ATOM    259  OW  HOH X  71      22.401   7.028  29.663  0.00  0.00            
ATOM    260  HW1 HOH X  71      22.558   6.304  30.270  0.00  0.00            
ATOM    261  HW2 HOH X  71      23.234   7.142  29.206  0.00  0.00            
ATOM    262  OW  HOH X  72      23.245  16.620   8.047  0.00  0.00            
ATOM    263  HW1 HOH X  72      24.008  17.029   8.456  0.00  0.00            
ATOM    264  HW2 HOH X  72      23.404  15.680   8.127  0.00  0.00            
ATOM    265  OW  HOH X  73      16.256  16.970  29.810  0.00  0.00            
ATOM    266  HW1 HOH X  73      16.913  16.427  30.244  0.00  0.00            
ATOM    267  HW2 HOH X  73      15.891  17.512  30.510  0.00  0.00            
ATOM    268  OW  HOH X  74      13.852  14.687  31.408  0.00  0.00            
ATOM    269  HW1 HOH X  74      14.238  14.732  30.533  0.00  0.00            
ATOM    270  HW2 HOH X  74      14.496  15.109  31.976  0.00  0.00            
ATOM    271  OW  HOH X  75      34.554   6.511  27.293  0.00  0.00            
ATOM    272  HW1 HOH X  75      34.984   7.205  27.793  0.00  0.00            
ATOM    273  HW2 HOH X  75      33.622   6.728  27.334  0.00  0.00            
ATOM    274  OW  HOH X  76      30.369  11.895  16.820  0.00  0.00            
ATOM    275  HW1 HOH X  76      30.895  12.650  16.556  0.00  0.00            
ATOM    276  HW2 HOH X  76      29.836  12.216  17.547  0.00  0.00            
ATOM    277  OW  HOH X  77      10.097  -4.492  12.893  0.00  0.00            
ATOM    278  HW1 HOH X  77       9.258  -4.908  12.696  0.00  0.00            
ATOM    279  HW2 HOH X  77       9.874  -3.583  13.095  0.00  0.00            
ATOM    280  OW  HOH X  78      33.544  14.822  16.474  0.00  0.00            
ATOM    281  HW1 HOH X  78      32.669  14.713  16.102  0.00  0.00            
ATOM    282  HW2 HOH X  78      33.394  14.943  17.411  0.00  0.00            
ATOM    283  OW  HOH X  79      30.996  14.312  15.455  0.00  0.00            
ATOM    284  HW1 HOH X  79      30.441  15.079  15.318  0.00  0.00            
ATOM    285  HW2 HOH X  79      31.466  14.205  14.628  0.00  0.00            
ATOM    286  OW  HOH X  80      12.175  26.548  16.772  0.00  0.00            
ATOM    287  HW1 HOH X  80      12.496  25.834  16.220  0.00  0.00            
ATOM    288  HW2 HOH X  80      12.625  26.425  17.608  0.00  0.00            
ATOM    289  OW  HOH X  81      -0.568   2.058  19.541  0.00  0.00            
ATOM    290  HW1 HOH X  81      -1.139   1.291  19.577  0.00  0.00            
ATOM    291  HW2 HOH X  81      -1.034   2.727  20.042  0.00  0.00            
ATOM    292  OW  HOH X  82      29.400  20.910  34.954  0.00  0.00            
ATOM    293  HW1 HOH X  82      30.295  21.225  35.082  0.00  0.00            
ATOM    294  HW2 HOH X  82      29.163  20.515  35.793  0.00  0.00            
ATOM    295  OW  HOH X  83      34.367   8.799  19.610  0.00  0.00            
ATOM    296  HW1 HOH X  83      33.779   8.991  18.880  0.00  0.00            
ATOM    297  HW2 HOH X  83      35.164   8.470  19.196  0.00  0.00            
ATOM    298  OW  HOH X  84       7.838   8.728  36.029  0.00  0.00            
ATOM    299  HW1 HOH X  84       7.066   8.169  36.114  0.00  0.00            
ATOM    300  HW2 HOH X  84       7.857   8.973  35.104  0.00  0.00            
ATOM    301  OW  HOH X  85       9.033   9.485  16.906  0.00  0.00            
ATOM    302  HW1 HOH X  85       9.293   8.840  16.249  0.00  0.00            
ATOM    303  HW2 HOH X  85       8.878   8.971  17.699  0.00  0.00            
ATOM    304  OW  HOH X  86      11.063  20.680  30.676  0.00  0.00            
ATOM    305  HW1 HOH X  86      11.347  19.773  30.567  0.00  0.00            
ATOM    306  HW2 HOH X  86      10.537  20.672  31.476  0.00  0.00            
ATOM    307  OW  HOH X  87      22.265  11.614   9.991  0.00  0.00            
ATOM    308  HW1 HOH X  87      22.778  10.904   9.605  0.00  0.00            
ATOM    309  HW2 HOH X  87      21.499  11.181  10.366  0.00  0.00            
ATOM    310  OW  HOH X  88      11.896  12.163   6.687  0.00  0.00            
ATOM    311  HW1 HOH X  88      12.217  12.255   5.790  0.00  0.00            
ATOM    312  HW2 HOH X  88      11.678  13.055   6.957  0.00  0.00            
ATOM    313  OW  HOH X  89      16.330   6.256  16.154  0.00  0.00            
ATOM    314  HW1 HOH X  89      16.557   6.403  15.236  0.00  0.00            
ATOM    315  HW2 HOH X  89      15.529   6.764  16.287  0.00  0.00            
ATOM    316  OW  HOH X  90      23.245  15.382  39.115  0.00  0.00            
ATOM    317  HW1 HOH X  90      22.557  15.162  38.486  0.00  0.00            
ATOM    318  HW2 HOH X  90      22.887  15.121  39.963  0.00  0.00            
ATOM    319  OW  HOH X  91      21.305  24.885  25.098  0.00  0.00            
ATOM    320  HW1 HOH X  91      21.992  25.342  24.614  0.00  0.00            
ATOM    321  HW2 HOH X  91      21.709  24.662  25.937  0.00  0.00            
ATOM    322  OW  HOH X  92       0.822  18.785  16.195  0.00  0.00            
ATOM    323  HW1 HOH X  92       1.697  18.913  15.828  0.00  0.00            
ATOM    324  HW2 HOH X  92       0.972  18.310  17.013  0.00  0.00            
ATOM    325  OW  HOH X  93      28.547  24.153  10.833  0.00  0.00            
ATOM    326  HW1 HOH X  93      29.120  23.658  11.418  0.00  0.00            
ATOM    327  HW2 HOH X  93      28.816  25.064  10.947  0.00  0.00            
ATOM    328  OW  HOH X  94      11.793  12.669  39.415  0.00  0.00            
ATOM    329  HW1 HOH X  94      12.565  12.223  39.762  0.00  0.00            
ATOM    330  HW2 HOH X  94      11.652  12.271  38.556  0.00  0.00            
ATOM    331  OW  HOH X  95      27.450  19.307  42.843  0.00  0.00            
ATOM    332  HW1 HOH X  95      27.425  18.518  43.385  0.00  0.00            
ATOM    333  HW2 HOH X  95      26.639  19.769  43.056  0.00  0.00            
ATOM    334  OW  HOH X  96      22.617  15.512  35.295  0.00  0.00            
ATOM    335  HW1 HOH X  96      23.543  15.270  35.264  0.00  0.00            
ATOM    336  HW2 HOH X  96      22.603  16.348  35.761  0.00  0.00            
ATOM    337  OW  HOH X  97      16.206   8.288   4.573  0.00  0.00            
ATOM    338  HW1 HOH X  97      16.556   9.177   4.620  0.00  0.00            
ATOM    339  HW2 HOH X  97      16.898   7.738   4.942  0.00  0.00            
ATOM    340  OW  HOH X  98      23.686  16.184  32.363  0.00  0.00            
ATOM    341  HW1 HOH X  98      24.003  17.033  32.671  0.00  0.00            
ATOM    342  HW2 HOH X  98      22.762  16.332  32.162  0.00  0.00            
ATOM    343  OW  HOH X  99      28.319  10.576  34.641  0.00  0.00            
ATOM    344  HW1 HOH X  99      29.087  10.314  34.133  0.00  0.00            
ATOM    345  HW2 HOH X  99      27.728  10.968  33.998  0.00  0.00            
ATOM    346  OW  HOH X 100      17.357  13.451  11.067  0.00  0.00            
ATOM    347  HW1 HOH X 100      16.835  12.810  10.585  0.00  0.00            
ATOM    348  HW2 HOH X 100      17.987  13.778  10.425  0.00  0.00            
ATOM    349  OW  HOH X 101      26.674  13.607  28.650  0.00  0.00            
ATOM    350  HW1 HOH X 101      27.098  14.235  28.065  0.00  0.00            
ATOM    351  HW2 HOH X 101      26.079  14.137  29.180  0.00  0.00            
ATOM    352  OW  HOH X 102      -2.223  13.104  16.435  0.00  0.00            
ATOM    353  HW1 HOH X 102      -3.051  12.627  16.497  0.00  0.00            
ATOM    354  HW2 HOH X 102      -1.649  12.524  15.933  0.00  0.00            
ATOM    355  OW  HOH X 103      24.521  23.174  34.154  0.00  0.00            
ATOM    356  HW1 HOH X 103      24.419  22.855  33.257  0.00  0.00            
ATOM    357  HW2 HOH X 103      25.468  23.223  34.285  0.00  0.00            
ATOM    358  OW  HOH X 104      18.523   8.543  26.501  0.00  0.00            
ATOM    359  HW1 HOH X 104      18.953   9.183  25.934  0.00  0.00            
ATOM    360  HW2 HOH X 104      19.100   8.470  27.261  0.00  0.00            
ATOM    361  OW  HOH X 105      -1.318  -0.109  33.344  0.00  0.00            
ATOM    362  HW1 HOH X 105      -0.734   0.646  33.414  0.00  0.00            
ATOM    363  HW2 HOH X 105      -1.600  -0.277  34.243  0.00  0.00            
ATOM    364  OW  HOH X 106      -0.484  17.938  13.887  0.00  0.00            
ATOM    365  HW1 HOH X 106       0.041  18.084  14.673  0.00  0.00            
ATOM    366  HW2 HOH X 106      -1.211  18.556  13.965  0.00  0.00            
ATOM    367  OW  HOH X 107      13.600   8.444  38.198  0.00  0.00            
ATOM    368  HW1 HOH X 107      14.098   8.468  39.014  0.00  0.00            
ATOM    369  HW2 HOH X 107      13.545   7.514  37.977  0.00  0.00            
ATOM    370  OW  HOH X 108      29.165   8.631  23.874  0.00  0.00            
ATOM    371  HW1 HOH X 108      29.642   7.807  23.768  0.00  0.00            
ATOM    372  HW2 HOH X 108      29.286   8.861  24.795  0.00  0.00            
ATOM    373  OW  HOH X 109      22.734   9.529  16.104  0.00  0.00            
ATOM    374  HW1 HOH X 109      22.369  10.414  16.127  0.00  0.00            
ATOM    375  HW2 HOH X 109      23.338   9.538  15.361  0.00  0.00            
ATOM    376  OW  HOH X 110      -0.857  15.788  15.816  0.00  0.00            
ATOM    377  HW1 HOH X 110      -0.272  15.888  15.066  0.00  0.00            
ATOM    378  HW2 HOH X 110      -0.755  14.874  16.081  0.00  0.00            
ATOM    379  OW  HOH X 111      11.044  12.492  18.244  0.00  0.00            
ATOM    380  HW1 HOH X 111      11.753  12.141  18.782  0.00  0.00            
ATOM    381  HW2 HOH X 111      11.487  12.920  17.512  0.00  0.00            
ATOM    382  OW  HOH X 112      20.231  11.605  29.163  0.00  0.00            
ATOM    383  HW1 HOH X 112      20.813  10.885  28.918  0.00  0.00            
ATOM    384  HW2 HOH X 112      20.803  12.239  29.596  0.00  0.00            
ATOM    385  OW  HOH X 113       3.746   8.271  21.947  0.00  0.00            
ATOM    386  HW1 HOH X 113       3.675   7.676  22.694  0.00  0.00            
ATOM    387  HW2 HOH X 113       4.074   9.088  22.321  0.00  0.00            
ATOM    388  OW  HOH X 114       7.746 -10.425  19.600  0.00  0.00            
ATOM    389  HW1 HOH X 114       8.163 -10.933  20.296  0.00  0.00            
ATOM    390  HW2 HOH X 114       7.430  -9.635  20.037  0.00  0.00            
ATOM    391  OW  HOH X 115      23.763  16.649  21.216  0.00  0.00            
ATOM    392  HW1 HOH X 115      24.258  16.598  22.034  0.00  0.00            
ATOM    393  HW2 HOH X 115      23.364  17.519  21.231  0.00  0.00            
ATOM    394  OW  HOH X 116       3.789   5.670  18.643  0.00  0.00            
ATOM    395  HW1 HOH X 116       4.574   5.263  18.277  0.00  0.00            
ATOM    396  HW2 HOH X 116       3.074   5.353  18.090  0.00  0.00            
ATOM    397  OW  HOH X 117      15.330  24.914  14.774  0.00  0.00            
ATOM    398  HW1 HOH X 117      14.416  24.650  14.877  0.00  0.00            
ATOM    399  HW2 HOH X 117      15.504  25.479  15.527  0.00  0.00            
ATOM    400  OW  HOH X 118       7.858   2.887  32.352  0.00  0.00            
ATOM    401  HW1 HOH X 118       8.224   2.031  32.131  0.00  0.00            
ATOM    402  HW2 HOH X 118       8.258   3.489  31.723  0.00  0.00            
ATOM    403  OW  HOH X 119       9.551  -7.781  11.500  0.00  0.00            
ATOM    404  HW1 HOH X 119       9.861  -7.010  11.025  0.00  0.00            
ATOM    405  HW2 HOH X 119       8.693  -7.969  11.120  0.00  0.00            
ATOM    406  OW  HOH X 120      21.718  19.152   7.477  0.00  0.00            
ATOM    407  HW1 HOH X 120      22.299  18.765   6.822  0.00  0.00            
ATOM    408  HW2 HOH X 120      22.156  18.990   8.312  0.00  0.00            
ATOM    409  OW  HOH X 121       9.543   7.647  14.873  0.00  0.00            
ATOM    410  HW1 HOH X 121       8.643   7.700  14.550  0.00  0.00            
ATOM    411  HW2 HOH X 121       9.564   6.843  15.393  0.00  0.00            
ATOM    412  OW  HOH X 122      10.076   6.159  10.476  0.00  0.00            
ATOM    413  HW1 HOH X 122      10.514   5.583   9.850  0.00  0.00            
ATOM    414  HW2 HOH X 122      10.427   7.029  10.288  0.00  0.00            
ATOM    415  OW  HOH X 123       0.964   0.037  22.435  0.00  0.00            
ATOM    416  HW1 HOH X 123       1.055   0.258  23.362  0.00  0.00            
ATOM    417  HW2 HOH X 123       1.507   0.682  21.981  0.00  0.00            
ATOM    418  OW  HOH X 124      23.071  18.115  38.636  0.00  0.00            
ATOM    419  HW1 HOH X 124      22.810  18.285  39.541  0.00  0.00            
ATOM    420  HW2 HOH X 124      23.337  17.195  38.632  0.00  0.00            
ATOM    421  OW  HOH X 125      16.716  33.799  28.012  0.00  0.00            
ATOM    422  HW1 HOH X 125      16.371  34.618  27.655  0.00  0.00            
ATOM    423  HW2 HOH X 125      17.370  33.516  27.374  0.00  0.00            
ATOM    424  OW  HOH X 126       7.730   1.783   3.448  0.00  0.00            
ATOM    425  HW1 HOH X 126       8.062   2.650   3.682  0.00  0.00            
ATOM    426  HW2 HOH X 126       8.455   1.189   3.638  0.00  0.00            
ATOM    427  OW  HOH X 127      21.781  26.038  36.853  0.00  0.00            
ATOM    428  HW1 HOH X 127      21.827  26.967  37.078  0.00  0.00            
ATOM    429  HW2 HOH X 127      22.590  25.869  36.369  0.00  0.00            
ATOM    430  OW  HOH X 128      22.816  -3.314  15.560  0.00  0.00            
ATOM    431  HW1 HOH X 128      22.528  -2.849  14.775  0.00  0.00            
ATOM    432  HW2 HOH X 128      23.012  -2.622  16.191  0.00  0.00            
ATOM    433  OW  HOH X 129      24.589  33.034  20.178  0.00  0.00            
ATOM    434  HW1 HOH X 129      24.651  32.978  21.131  0.00  0.00            
ATOM    435  HW2 HOH X 129      25.281  32.456  19.858  0.00  0.00            
ATOM    436  OW  HOH X 130      19.600   4.404  31.143  0.00  0.00            
ATOM    437  HW1 HOH X 130      19.121   3.578  31.211  0.00  0.00            
ATOM    438  HW2 HOH X 130      20.282   4.234  30.493  0.00  0.00            
ATOM    439  OW  HOH X 131      26.977   7.866  27.271  0.00  0.00            
ATOM    440  HW1 HOH X 131      27.243   6.970  27.066  0.00  0.00            
ATOM    441  HW2 HOH X 131      26.534   7.798  28.116  0.00  0.00            
ATOM    442  OW  HOH X 132      24.553  21.608  32.026  0.00  0.00            
ATOM    443  HW1 HOH X 132      24.212  20.747  32.268  0.00  0.00            
ATOM    444  HW2 HOH X 132      24.332  21.703  31.099  0.00  0.00            
ATOM    445  OW  HOH X 133      18.837   8.542  14.290  0.00  0.00            
ATOM    446  HW1 HOH X 133      17.943   8.865  14.401  0.00  0.00            
ATOM    447  HW2 HOH X 133      19.288   8.806  15.092  0.00  0.00            
ATOM    448  OW  HOH X 134      32.193   9.149  21.005  0.00  0.00            
ATOM    449  HW1 HOH X 134      33.033   9.100  20.549  0.00  0.00            
ATOM    450  HW2 HOH X 134      32.127   8.319  21.476  0.00  0.00            
ATOM    451  OW  HOH X 135      12.900   3.208  14.759  0.00  0.00            
ATOM    452  HW1 HOH X 135      13.704   3.547  15.153  0.00  0.00            
ATOM    453  HW2 HOH X 135      12.242   3.288  15.449  0.00  0.00            
ATOM    454  OW  HOH X 136       7.452  15.452   7.771  0.00  0.00            
ATOM    455  HW1 HOH X 136       8.248  15.045   8.111  0.00  0.00            
ATOM    456  HW2 HOH X 136       7.404  16.298   8.217  0.00  0.00            
ATOM    457  OW  HOH X 137      12.239   1.537  12.594  0.00  0.00            
ATOM    458  HW1 HOH X 137      12.414   2.123  13.331  0.00  0.00            
ATOM    459  HW2 HOH X 137      11.284   1.521  12.522  0.00  0.00            
ATOM    460  OW  HOH X 138       2.859  12.359   9.273  0.00  0.00            
ATOM    461  HW1 HOH X 138       3.375  11.586   9.500  0.00  0.00            
ATOM    462  HW2 HOH X 138       3.479  13.086   9.328  0.00  0.00            
ATOM    463  OW  HOH X 139       6.021  26.854  20.385  0.00  0.00            
ATOM    464  HW1 HOH X 139       6.659  26.171  20.180  0.00  0.00            
ATOM    465  HW2 HOH X 139       6.218  27.105  21.287  0.00  0.00            
ATOM    466  OW  HOH X 140      33.225   9.590  33.693  0.00  0.00            
ATOM    467  HW1 HOH X 140      33.471  10.286  34.301  0.00  0.00            
ATOM    468  HW2 HOH X 140      34.027   9.082  33.572  0.00  0.00            
ATOM    469  OW  HOH X 141      10.118   8.263   8.346  0.00  0.00            
ATOM    470  HW1 HOH X 141      10.966   8.606   8.065  0.00  0.00            
ATOM    471  HW2 HOH X 141      10.208   7.313   8.271  0.00  0.00            
ATOM    472  OW  HOH X 142      30.072  -3.703  23.119  0.00  0.00            
ATOM    473  HW1 HOH X 142      29.940  -4.339  22.416  0.00  0.00            
ATOM    474  HW2 HOH X 142      30.821  -3.181  22.832  0.00  0.00            
ATOM    475  OW  HOH X 143      10.755  18.994  26.816  0.00  0.00            
ATOM    476  HW1 HOH X 143       9.888  19.028  27.220  0.00  0.00            
ATOM    477  HW2 HOH X 143      11.221  18.316  27.305  0.00  0.00            
ATOM    478  OW  HOH X 144      16.793  16.271  11.409  0.00  0.00            
ATOM    479  HW1 HOH X 144      17.033  15.376  11.169  0.00  0.00            
ATOM    480  HW2 HOH X 144      17.531  16.585  11.931  0.00  0.00            
ATOM    481  OW  HOH X 145      24.943  10.450  20.955  0.00  0.00            
ATOM    482  HW1 HOH X 145      24.676  11.366  20.878  0.00  0.00            
ATOM    483  HW2 HOH X 145      25.569  10.441  21.679  0.00  0.00            
ATOM    484  OW  HOH X 146      19.959  20.258   9.504  0.00  0.00            
ATOM    485  HW1 HOH X 146      20.541  19.920  10.185  0.00  0.00            
ATOM    486  HW2 HOH X 146      20.072  19.654   8.770  0.00  0.00            
ATOM    487  OW  HOH X 147      28.279  17.603  15.782  0.00  0.00            
ATOM    488  HW1 HOH X 147      27.982  16.813  16.234  0.00  0.00            
ATOM    489  HW2 HOH X 147      28.061  17.449  14.862  0.00  0.00            
ATOM    490  OW  HOH X 148      -4.083   4.672  30.463  0.00  0.00            
ATOM    491  HW1 HOH X 148      -4.977   4.343  30.560  0.00  0.00            
ATOM    492  HW2 HOH X 148      -3.712   4.154  29.749  0.00  0.00            
ATOM    493  OW  HOH X 149       9.375   3.153   6.648  0.00  0.00            
ATOM    494  HW1 HOH X 149       8.746   2.446   6.792  0.00  0.00            
ATOM    495  HW2 HOH X 149      10.231   2.730   6.717  0.00  0.00            
ATOM    496  OW  HOH X 150      17.112  28.868  31.653  0.00  0.00            
ATOM    497  HW1 HOH X 150      17.562  29.452  32.263  0.00  0.00            
ATOM    498  HW2 HOH X 150      17.638  28.069  31.653  0.00  0.00            
ATOM    499  OW  HOH X 151      11.148  -5.558  15.687  0.00  0.00            
ATOM    500  HW1 HOH X 151      10.488  -6.223  15.493  0.00  0.00            
ATOM    501  HW2 HOH X 151      10.659  -4.735  15.711  0.00  0.00            
ATOM    502  OW  HOH X 152       4.482   6.502  31.031  0.00  0.00            
ATOM    503  HW1 HOH X 152       5.316   6.309  30.604  0.00  0.00            
ATOM    504  HW2 HOH X 152       4.529   7.435  31.240  0.00  0.00            
ATOM    505  OW  HOH X 153      16.045 -12.169  17.950  0.00  0.00            
ATOM    506  HW1 HOH X 153      15.815 -11.510  18.605  0.00  0.00            
ATOM    507  HW2 HOH X 153      16.302 -12.936  18.462  0.00  0.00            
ATOM    508  OW  HOH X 154      33.046  17.649  28.217  0.00  0.00            
ATOM    509  HW1 HOH X 154      32.642  16.882  27.812  0.00  0.00            
ATOM    510  HW2 HOH X 154      32.409  17.939  28.870  0.00  0.00            
ATOM    511  OW  HOH X 155      19.925  27.361  27.451  0.00  0.00            
ATOM    512  HW1 HOH X 155      20.317  27.184  26.596  0.00  0.00            
ATOM    513  HW2 HOH X 155      20.655  27.664  27.991  0.00  0.00            
ATOM    514  OW  HOH X 156      33.028  23.279  16.108  0.00  0.00            
ATOM    515  HW1 HOH X 156      33.074  23.822  15.322  0.00  0.00            
ATOM    516  HW2 HOH X 156      32.782  22.411  15.787  0.00  0.00            
ATOM    517  OW  HOH X 157      15.481  16.169  33.223  0.00  0.00            
ATOM    518  HW1 HOH X 157      16.049  16.811  32.796  0.00  0.00            
ATOM    519  HW2 HOH X 157      16.075  15.643  33.759  0.00  0.00            
ATOM    520  OW  HOH X 158      18.218  20.980  37.550  0.00  0.00            
ATOM    521  HW1 HOH X 158      17.635  20.677  36.853  0.00  0.00            
ATOM    522  HW2 HOH X 158      19.048  20.535  37.379  0.00  0.00            
ATOM    523  OW  HOH X 159      16.945  14.188  34.934  0.00  0.00            
ATOM    524  HW1 HOH X 159      17.760  14.683  35.028  0.00  0.00            
ATOM    525  HW2 HOH X 159      17.214  13.271  34.992  0.00  0.00            
ATOM    526  OW  HOH X 160      32.888  11.755  29.723  0.00  0.00            
ATOM    527  HW1 HOH X 160      32.780  12.569  30.214  0.00  0.00            
ATOM    528  HW2 HOH X 160      33.633  11.921  29.145  0.00  0.00            
ATOM    529  OW  HOH X 161      35.659   4.843  25.146  0.00  0.00            
ATOM    530  HW1 HOH X 161      35.411   5.401  25.882  0.00  0.00            
ATOM    531  HW2 HOH X 161      36.589   4.663  25.284  0.00  0.00            
ATOM    532  OW  HOH X 162      29.466  29.622  20.271  0.00  0.00            
ATOM    533  HW1 HOH X 162      29.339  29.766  19.333  0.00  0.00            
ATOM    534  HW2 HOH X 162      28.920  28.863  20.473  0.00  0.00            
ATOM    535  OW  HOH X 163      18.305   4.914  20.798  0.00  0.00            
ATOM    536  HW1 HOH X 163      19.254   4.817  20.716  0.00  0.00            
ATOM    537  HW2 HOH X 163      18.026   4.143  21.291  0.00  0.00            
ATOM    538  OW  HOH X 164      17.193  29.235  28.967  0.00  0.00            
ATOM    539  HW1 HOH X 164      17.095  29.230  29.919  0.00  0.00            
ATOM    540  HW2 HOH X 164      17.345  28.318  28.737  0.00  0.00            
ATOM    541  OW  HOH X 165      -6.121   6.379  22.323  0.00  0.00            
ATOM    542  HW1 HOH X 165      -5.977   7.311  22.488  0.00  0.00            
ATOM    543  HW2 HOH X 165      -6.749   6.357  21.600  0.00  0.00            
ATOM    544  OW  HOH X 166      -1.164   7.937  17.833  0.00  0.00            
ATOM    545  HW1 HOH X 166      -1.900   7.327  17.855  0.00  0.00            
ATOM    546  HW2 HOH X 166      -0.398   7.384  17.676  0.00  0.00            
ATOM    547  OW  HOH X 167      28.114  16.398  24.609  0.00  0.00            
ATOM    548  HW1 HOH X 167      28.097  17.267  25.008  0.00  0.00            
ATOM    549  HW2 HOH X 167      27.895  16.551  23.690  0.00  0.00            
ATOM    550  OW  HOH X 168      27.119  17.076  22.080  0.00  0.00            
ATOM    551  HW1 HOH X 168      26.850  17.972  21.876  0.00  0.00            
ATOM    552  HW2 HOH X 168      27.706  16.833  21.365  0.00  0.00            
ATOM    553  OW  HOH X 169      20.134  14.017  20.076  0.00  0.00            
ATOM    554  HW1 HOH X 169      19.695  14.757  19.656  0.00  0.00            
ATOM    555  HW2 HOH X 169      19.443  13.579  20.573  0.00  0.00            
ATOM    556  OW  HOH X 170      20.350   6.306  18.499  0.00  0.00            
ATOM    557  HW1 HOH X 170      21.138   5.950  18.087  0.00  0.00            
ATOM    558  HW2 HOH X 170      20.265   7.186  18.133  0.00  0.00            
ATOM    559  OW  HOH X 171       9.427   6.373  38.456  0.00  0.00            
ATOM    560  HW1 HOH X 171       8.590   5.930  38.311  0.00  0.00            
ATOM    561  HW2 HOH X 171       9.401   7.130  37.872  0.00  0.00            
ATOM    562  OW  HOH X 172      23.585  26.651  27.830  0.00  0.00            
ATOM    563  HW1 HOH X 172      23.034  27.322  28.233  0.00  0.00            
ATOM    564  HW2 HOH X 172      23.757  26.027  28.535  0.00  0.00            
ATOM    565  OW  HOH X 173      29.632  30.423  17.535  0.00  0.00            
ATOM    566  HW1 HOH X 173      29.105  31.221  17.579  0.00  0.00            
ATOM    567  HW2 HOH X 173      29.387  30.019  16.702  0.00  0.00            
ATOM    568  OW  HOH X 174      14.154  22.912  18.937  0.00  0.00            
ATOM    569  HW1 HOH X 174      15.083  23.136  18.884  0.00  0.00            
ATOM    570  HW2 HOH X 174      14.114  22.203  19.579  0.00  0.00            
ATOM    571  OW  HOH X 175      23.078  13.812   8.713  0.00  0.00            
ATOM    572  HW1 HOH X 175      22.503  13.886   7.951  0.00  0.00            
ATOM    573  HW2 HOH X 175      22.695  13.107   9.235  0.00  0.00            
ATOM    574  OW  HOH X 176      17.162  23.279  36.047  0.00  0.00            
ATOM    575  HW1 HOH X 176      18.028  23.257  36.456  0.00  0.00            
ATOM    576  HW2 HOH X 176      16.798  24.127  36.302  0.00  0.00            
ATOM    577  OW  HOH X 177      27.289  -2.897  23.452  0.00  0.00            
ATOM    578  HW1 HOH X 177      27.789  -3.209  24.207  0.00  0.00            
ATOM    579  HW2 HOH X 177      27.872  -2.273  23.020  0.00  0.00            
ATOM    580  OW  HOH X 178       3.406  16.156   9.767  0.00  0.00            
ATOM    581  HW1 HOH X 178       3.156  16.044  10.684  0.00  0.00            
ATOM    582  HW2 HOH X 178       4.224  15.668   9.679  0.00  0.00            
ATOM    583  OW  HOH X 179      11.622  -8.513  14.613  0.00  0.00            
ATOM    584  HW1 HOH X 179      12.266  -9.089  14.202  0.00  0.00            
ATOM    585  HW2 HOH X 179      11.754  -7.665  14.188  0.00  0.00            
ATOM    586  OW  HOH X 180      20.981  16.312  17.178  0.00  0.00            
ATOM    587  HW1 HOH X 180      20.241  15.998  17.698  0.00  0.00            
ATOM    588  HW2 HOH X 180      21.754  15.985  17.638  0.00  0.00            
ATOM    589  OW  HOH X 181      27.487  24.959  19.438  0.00  0.00            
ATOM    590  HW1 HOH X 181      27.760  24.043  19.387  0.00  0.00            
ATOM    591  HW2 HOH X 181      27.852  25.362  18.651  0.00  0.00            
ATOM    592  OW  HOH X 182       2.298  -1.375  25.900  0.00  0.00            
ATOM    593  HW1 HOH X 182       2.088  -1.632  26.797  0.00  0.00            
ATOM    594  HW2 HOH X 182       3.169  -1.740  25.743  0.00  0.00            
ATOM    595  OW  HOH X 183      28.798   4.231  29.968  0.00  0.00            
ATOM    596  HW1 HOH X 183      28.188   4.968  29.975  0.00  0.00            
ATOM    597  HW2 HOH X 183      28.287   3.494  30.304  0.00  0.00            
ATOM    598  OW  HOH X 184      18.658   6.374  23.143  0.00  0.00            
ATOM    599  HW1 HOH X 184      19.614   6.327  23.128  0.00  0.00            
ATOM    600  HW2 HOH X 184      18.389   6.066  22.278  0.00  0.00            
ATOM    601  OW  HOH X 185      21.188  26.803  17.041  0.00  0.00            
ATOM    602  HW1 HOH X 185      21.854  27.422  16.744  0.00  0.00            
ATOM    603  HW2 HOH X 185      21.685  26.074  17.410  0.00  0.00            
ATOM    604  OW  HOH X 186      10.863  19.984  22.701  0.00  0.00            
ATOM    605  HW1 HOH X 186      10.881  19.622  21.815  0.00  0.00            
ATOM    606  HW2 HOH X 186      10.522  19.273  23.244  0.00  0.00            
ATOM    607  OW  HOH X 187      20.878  35.373  25.247  0.00  0.00            
ATOM    608  HW1 HOH X 187      21.771  35.372  25.590  0.00  0.00            
ATOM    609  HW2 HOH X 187      20.398  35.961  25.830  0.00  0.00            
ATOM    610  OW  HOH X 188      17.667  11.578  18.480  0.00  0.00            
ATOM    611  HW1 HOH X 188      16.822  11.885  18.808  0.00  0.00            
ATOM    612  HW2 HOH X 188      18.311  11.975  19.068  0.00  0.00            
ATOM    613  OW  HOH X 189      -2.264   7.394  21.461  0.00  0.00            
ATOM    614  HW1 HOH X 189      -2.083   8.147  22.024  0.00  0.00            
ATOM    615  HW2 HOH X 189      -3.031   6.979  21.855  0.00  0.00            
ATOM    616  OW  HOH X 190       1.293   1.523  16.995  0.00  0.00            
ATOM    617  HW1 HOH X 190       1.861   0.909  16.529  0.00  0.00            
ATOM    618  HW2 HOH X 190       0.444   1.442  16.561  0.00  0.00            
ATOM    619  OW  HOH X 191      20.740  -5.630  19.867  0.00  0.00            
ATOM    620  HW1 HOH X 191      20.969  -6.424  19.382  0.00  0.00            
ATOM    621  HW2 HOH X 191      20.473  -5.006  19.193  0.00  0.00            
ATOM    622  OW  HOH X 192      -1.759  10.303  27.643  0.00  0.00            
ATOM    623  HW1 HOH X 192      -1.037  10.488  27.042  0.00  0.00            
ATOM    624  HW2 HOH X 192      -2.036   9.415  27.420  0.00  0.00            
ATOM    625  OW  HOH X 193       3.774  -1.926  14.040  0.00  0.00            
ATOM    626  HW1 HOH X 193       3.243  -2.707  13.887  0.00  0.00            
ATOM    627  HW2 HOH X 193       4.512  -2.015  13.436  0.00  0.00            
ATOM    628  OW  HOH X 194       4.936   3.038  15.418  0.00  0.00            
ATOM    629  HW1 HOH X 194       5.232   3.150  14.514  0.00  0.00            
ATOM    630  HW2 HOH X 194       5.693   2.670  15.874  0.00  0.00            
ATOM    631  OW  HOH X 195      14.870  -2.511  19.358  0.00  0.00            
ATOM    632  HW1 HOH X 195      14.842  -3.090  18.596  0.00  0.00            
ATOM    633  HW2 HOH X 195      15.802  -2.422  19.558  0.00  0.00            
ATOM    634  OW  HOH X 196       4.945  10.168   4.061  0.00  0.00            
ATOM    635  HW1 HOH X 196       5.539   9.481   4.363  0.00  0.00            
ATOM    636  HW2 HOH X 196       5.258  10.963   4.492  0.00  0.00            
ATOM    637  OW  HOH X 197      30.881   6.028  21.103  0.00  0.00            
ATOM    638  HW1 HOH X 197      30.097   6.546  20.922  0.00  0.00            
ATOM    639  HW2 HOH X 197      31.286   5.897  20.245  0.00  0.00            
ATOM    640  OW  HOH X 198      26.843  17.433  28.812  0.00  0.00            
ATOM    641  HW1 HOH X 198      27.370  16.986  28.151  0.00  0.00            
ATOM    642  HW2 HOH X 198      26.647  16.756  29.461  0.00  0.00            
ATOM    643  OW  HOH X 199      13.398  32.422  24.953  0.00  0.00            
ATOM    644  HW1 HOH X 199      14.218  32.823  24.665  0.00  0.00            
ATOM    645  HW2 HOH X 199      12.766  33.142  24.954  0.00  0.00            
ATOM    646  OW  HOH X 200      15.933  30.638  21.260  0.00  0.00            
ATOM    647  HW1 HOH X 200      16.633  30.170  21.715  0.00  0.00            
ATOM    648  HW2 HOH X 200      15.182  30.580  21.851  0.00  0.00            
ATOM    649  OW  HOH X 201      15.547  18.544  10.506  0.00  0.00            
ATOM    650  HW1 HOH X 201      14.606  18.446  10.360  0.00  0.00            
ATOM    651  HW2 HOH X 201      15.798  17.759  10.993  0.00  0.00            
ATOM    652  OW  HOH X 202       5.470  14.350   9.743  0.00  0.00            
ATOM    653  HW1 HOH X 202       6.117  14.542  10.423  0.00  0.00            
ATOM    654  HW2 HOH X 202       5.991  14.097   8.981  0.00  0.00            
ATOM    655  OW  HOH X 203      25.453  16.155  19.126  0.00  0.00            
ATOM    656  HW1 HOH X 203      24.887  15.457  18.797  0.00  0.00            
ATOM    657  HW2 HOH X 203      25.197  16.261  20.042  0.00  0.00            
ATOM    658  OW  HOH X 204      -6.835  11.178  15.871  0.00  0.00            
ATOM    659  HW1 HOH X 204      -6.559  11.330  14.967  0.00  0.00            
ATOM    660  HW2 HOH X 204      -7.618  11.718  15.977  0.00  0.00            
ATOM    661  OW  HOH X 205      18.722  15.405  42.518  0.00  0.00            
ATOM    662  HW1 HOH X 205      19.335  16.135  42.427  0.00  0.00            
ATOM    663  HW2 HOH X 205      19.170  14.787  43.096  0.00  0.00            
ATOM    664  OW  HOH X 206      15.305  27.323  20.365  0.00  0.00            
ATOM    665  HW1 HOH X 206      15.499  27.853  19.592  0.00  0.00            
ATOM    666  HW2 HOH X 206      14.404  27.029  20.235  0.00  0.00            
ATOM    667  OW  HOH X 207       7.206  -3.445  29.185  0.00  0.00            
ATOM    668  HW1 HOH X 207       6.306  -3.175  29.369  0.00  0.00            
ATOM    669  HW2 HOH X 207       7.247  -4.357  29.471  0.00  0.00            
ATOM    670  OW  HOH X 208      22.195  31.001  24.795  0.00  0.00            
ATOM    671  HW1 HOH X 208      21.798  31.450  25.542  0.00  0.00            
ATOM    672  HW2 HOH X 208      21.501  30.972  24.137  0.00  0.00            
ATOM    673  OW  HOH X 209      16.708  16.720  37.780  0.00  0.00            
ATOM    674  HW1 HOH X 209      17.468  16.138  37.813  0.00  0.00            
ATOM    675  HW2 HOH X 209      16.895  17.395  38.433  0.00  0.00            
ATOM    676  OW  HOH X 210       6.361   5.479  23.565  0.00  0.00            
ATOM    677  HW1 HOH X 210       7.003   5.942  24.102  0.00  0.00            
ATOM    678  HW2 HOH X 210       6.190   4.666  24.042  0.00  0.00            
ATOM    679  OW  HOH X 211      24.030  14.939  13.643  0.00  0.00            
ATOM    680  HW1 HOH X 211      24.450  15.366  12.896  0.00  0.00            
ATOM    681  HW2 HOH X 211      23.591  14.176  13.268  0.00  0.00            
ATOM    682  OW  HOH X 212      18.419   0.272  22.180  0.00  0.00            
ATOM    683  HW1 HOH X 212      19.349   0.499  22.173  0.00  0.00            
ATOM    684  HW2 HOH X 212      18.265  -0.083  23.055  0.00  0.00            
ATOM    685  OW  HOH X 213       8.714   0.352  23.016  0.00  0.00            
ATOM    686  HW1 HOH X 213       8.707   0.535  23.955  0.00  0.00            
ATOM    687  HW2 HOH X 213       9.426   0.890  22.672  0.00  0.00            
ATOM    688  OW  HOH X 214      35.429  18.420  17.812  0.00  0.00            
ATOM    689  HW1 HOH X 214      35.900  17.587  17.831  0.00  0.00            
ATOM    690  HW2 HOH X 214      35.652  18.840  18.643  0.00  0.00            
ATOM    691  OW  HOH X 215       9.131   1.247  34.280  0.00  0.00            
ATOM    692  HW1 HOH X 215       9.840   1.678  33.803  0.00  0.00            
ATOM    693  HW2 HOH X 215       8.648   1.964  34.692  0.00  0.00            
ATOM    694  OW  HOH X 216      20.306  -1.320  26.864  0.00  0.00            
ATOM    695  HW1 HOH X 216      20.922  -1.983  27.177  0.00  0.00            
ATOM    696  HW2 HOH X 216      20.091  -0.806  27.641  0.00  0.00            
ATOM    697  OW  HOH X 217      27.391   1.586  21.775  0.00  0.00            
ATOM    698  HW1 HOH X 217      27.231   2.437  22.182  0.00  0.00            
ATOM    699  HW2 HOH X 217      27.154   1.710  20.856  0.00  0.00            
ATOM    700  OW  HOH X 218      24.656  32.105  23.305  0.00  0.00            
ATOM    701  HW1 HOH X 218      24.267  31.231  23.277  0.00  0.00            
ATOM    702  HW2 HOH X 218      23.933  32.696  23.096  0.00  0.00            
ATOM    703  OW  HOH X 219      32.514  10.745  18.237  0.00  0.00            
ATOM    704  HW1 HOH X 219      32.888  11.590  18.485  0.00  0.00            
ATOM    705  HW2 HOH X 219      31.571  10.905  18.186  0.00  0.00            
ATOM    706  OW  HOH X 220      10.555  -5.126  25.275  0.00  0.00            
ATOM    707  HW1 HOH X 220      10.695  -4.186  25.158  0.00  0.00            
ATOM    708  HW2 HOH X 220      11.051  -5.533  24.565  0.00  0.00            
ATOM    709  OW  HOH X 221       9.690  14.781  13.658  0.00  0.00            
ATOM    710  HW1 HOH X 221       8.899  15.059  14.120  0.00  0.00            
ATOM    711  HW2 HOH X 221      10.169  15.593  13.493  0.00  0.00            
ATOM    712  OW  HOH X 222       6.512   2.432  27.928  0.00  0.00            
ATOM    713  HW1 HOH X 222       7.019   1.639  27.757  0.00  0.00            
ATOM    714  HW2 HOH X 222       5.908   2.185  28.628  0.00  0.00            
ATOM    715  OW  HOH X 223      30.132  17.603  29.633  0.00  0.00            
ATOM    716  HW1 HOH X 223      29.795  17.449  30.516  0.00  0.00            
ATOM    717  HW2 HOH X 223      29.985  16.777  29.172  0.00  0.00            
ATOM    718  OW  HOH X 224      32.236   5.255  18.900  0.00  0.00            
ATOM    719  HW1 HOH X 224      32.983   4.795  19.284  0.00  0.00            
ATOM    720  HW2 HOH X 224      32.625   5.998  18.438  0.00  0.00            
ATOM    721  OW  HOH X 225      18.660  14.346  37.840  0.00  0.00            
ATOM    722  HW1 HOH X 225      18.078  13.953  38.491  0.00  0.00            
ATOM    723  HW2 HOH X 225      19.398  13.739  37.781  0.00  0.00            
ATOM    724  OW  HOH X 226      27.548  10.172  10.703  0.00  0.00            
ATOM    725  HW1 HOH X 226      28.412  10.512  10.934  0.00  0.00            
ATOM    726  HW2 HOH X 226      26.935  10.828  11.034  0.00  0.00            
ATOM    727  OW  HOH X 227       7.325   2.638  21.025  0.00  0.00            
ATOM    728  HW1 HOH X 227       7.067   2.480  21.933  0.00  0.00            
ATOM    729  HW2 HOH X 227       7.136   1.814  20.575  0.00  0.00            
ATOM    730  OW  HOH X 228      18.555   6.529  29.991  0.00  0.00            
ATOM    731  HW1 HOH X 228      18.864   5.683  30.314  0.00  0.00            
ATOM    732  HW2 HOH X 228      18.179   6.957  30.761  0.00  0.00            
ATOM    733  OW  HOH X 229       9.753  23.456  26.984  0.00  0.00            
ATOM    734  HW1 HOH X 229       9.961  23.360  27.914  0.00  0.00            
ATOM    735  HW2 HOH X 229       9.068  24.124  26.958  0.00  0.00            
ATOM    736  OW  HOH X 230      20.666  19.331  37.751  0.00  0.00            
ATOM    737  HW1 HOH X 230      21.532  19.562  38.088  0.00  0.00            
ATOM    738  HW2 HOH X 230      20.377  18.608  38.309  0.00  0.00            
ATOM    739  OW  HOH X 231      -0.286  10.951  15.756  0.00  0.00            
ATOM    740  HW1 HOH X 231      -0.184  10.135  16.246  0.00  0.00            
ATOM    741  HW2 HOH X 231      -0.238  10.687  14.837  0.00  0.00            
ATOM    742  OW  HOH X 232       7.627   3.400  35.012  0.00  0.00            
ATOM    743  HW1 HOH X 232       6.735   3.128  35.229  0.00  0.00            
ATOM    744  HW2 HOH X 232       7.640   3.436  34.055  0.00  0.00            
ATOM    745  OW  HOH X 233      11.917  -1.246  14.548  0.00  0.00            
ATOM    746  HW1 HOH X 233      11.964  -0.334  14.835  0.00  0.00            
ATOM    747  HW2 HOH X 233      12.398  -1.734  15.216  0.00  0.00            
ATOM    748  OW  HOH X 234      -0.102  13.254  19.256  0.00  0.00            
ATOM    749  HW1 HOH X 234       0.007  13.393  18.315  0.00  0.00            
ATOM    750  HW2 HOH X 234       0.369  12.440  19.434  0.00  0.00            
ATOM    751  OW  HOH X 235      25.991  18.787  45.716  0.00  0.00            
ATOM    752  HW1 HOH X 235      25.678  19.323  44.988  0.00  0.00            
ATOM    753  HW2 HOH X 235      25.973  19.374  46.472  0.00  0.00            
ATOM    754  OW  HOH X 236      41.211   7.401  26.631  0.00  0.00            
ATOM    755  HW1 HOH X 236      40.579   7.064  25.996  0.00  0.00            
ATOM    756  HW2 HOH X 236      42.013   7.531  26.127  0.00  0.00            
ATOM    757  OW  HOH X 237      -6.690  15.818  19.528  0.00  0.00            
ATOM    758  HW1 HOH X 237      -7.635  15.758  19.390  0.00  0.00            
ATOM    759  HW2 HOH X 237      -6.315  15.209  18.892  0.00  0.00            
ATOM    760  OW  HOH X 238      22.832  20.750  34.663  0.00  0.00            
ATOM    761  HW1 HOH X 238      22.080  21.329  34.781  0.00  0.00            
ATOM    762  HW2 HOH X 238      23.570  21.341  34.513  0.00  0.00            
ATOM    763  OW  HOH X 239      22.685  17.260   5.403  0.00  0.00            
ATOM    764  HW1 HOH X 239      23.321  16.855   4.814  0.00  0.00            
ATOM    765  HW2 HOH X 239      22.724  16.731   6.200  0.00  0.00            
ATOM    766  OW  HOH X 240       5.493  18.025  24.064  0.00  0.00            
ATOM    767  HW1 HOH X 240       6.168  18.101  24.739  0.00  0.00            
ATOM    768  HW2 HOH X 240       5.666  18.754  23.468  0.00  0.00            
ATOM    769  OW  HOH X 241      19.509  -2.387  13.433  0.00  0.00            
ATOM    770  HW1 HOH X 241      20.131  -1.844  12.948  0.00  0.00            
ATOM    771  HW2 HOH X 241      19.687  -2.192  14.353  0.00  0.00            
ATOM    772  OW  HOH X 242      15.817  30.650  26.021  0.00  0.00            
ATOM    773  HW1 HOH X 242      16.685  30.928  25.729  0.00  0.00            
ATOM    774  HW2 HOH X 242      15.244  31.387  25.805  0.00  0.00            
ATOM    775  OW  HOH X 243      13.160  -6.263  26.061  0.00  0.00            
ATOM    776  HW1 HOH X 243      12.444  -5.672  25.829  0.00  0.00            
ATOM    777  HW2 HOH X 243      13.416  -5.995  26.943  0.00  0.00            
ATOM    778  OW  HOH X 244      -1.901   9.772  13.198  0.00  0.00            
ATOM    779  HW1 HOH X 244      -1.833   9.495  14.112  0.00  0.00            
ATOM    780  HW2 HOH X 244      -1.856   8.958  12.696  0.00  0.00            
ATOM    781  OW  HOH X 245      27.520   1.409  27.636  0.00  0.00            
ATOM    782  HW1 HOH X 245      27.536   0.456  27.721  0.00  0.00            
ATOM    783  HW2 HOH X 245      28.358   1.628  27.228  0.00  0.00            
ATOM    784  OW  HOH X 246      21.322   4.607  25.724  0.00  0.00            
ATOM    785  HW1 HOH X 246      20.887   5.028  26.465  0.00  0.00            
ATOM    786  HW2 HOH X 246      21.781   3.860  26.107  0.00  0.00            
ATOM    787  OW  HOH X 247       9.870  -1.984  29.400  0.00  0.00            
ATOM    788  HW1 HOH X 247      10.696  -2.433  29.582  0.00  0.00            
ATOM    789  HW2 HOH X 247       9.199  -2.655  29.528  0.00  0.00            
ATOM    790  OW  HOH X 248      13.505 -10.035  13.454  0.00  0.00            
ATOM    791  HW1 HOH X 248      13.956 -10.871  13.336  0.00  0.00            
ATOM    792  HW2 HOH X 248      13.491  -9.645  12.580  0.00  0.00            
ATOM    793  OW  HOH X 249      27.446  20.673  23.645  0.00  0.00            
ATOM    794  HW1 HOH X 249      27.757  19.931  24.164  0.00  0.00            
ATOM    795  HW2 HOH X 249      27.022  20.273  22.886  0.00  0.00            
ATOM    796  OW  HOH X 250      10.095   8.648  33.071  0.00  0.00            
ATOM    797  HW1 HOH X 250       9.254   8.588  32.618  0.00  0.00            
ATOM    798  HW2 HOH X 250      10.579   7.873  32.783  0.00  0.00            
ATOM    799  OW  HOH X 251      24.489  17.672  27.351  0.00  0.00            
ATOM    800  HW1 HOH X 251      25.237  17.698  27.947  0.00  0.00            
ATOM    801  HW2 HOH X 251      24.617  18.425  26.772  0.00  0.00            
ATOM    802  OW  HOH X 252      30.565  10.190  33.123  0.00  0.00            
ATOM    803  HW1 HOH X 252      31.455  10.056  33.450  0.00  0.00            
ATOM    804  HW2 HOH X 252      30.634  10.057  32.178  0.00  0.00            
ATOM    805  OW  HOH X 253      22.865   9.591  23.900  0.00  0.00            
ATOM    806  HW1 HOH X 253      23.003  10.389  24.411  0.00  0.00            
ATOM    807  HW2 HOH X 253      22.294   9.862  23.181  0.00  0.00            
ATOM    808  OW  HOH X 254      12.594   3.061   1.502  0.00  0.00            
ATOM    809  HW1 HOH X 254      12.152   2.488   0.875  0.00  0.00            
ATOM    810  HW2 HOH X 254      13.128   3.642   0.960  0.00  0.00            
ATOM    811  OW  HOH X 255      26.809  21.962   9.497  0.00  0.00            
ATOM    812  HW1 HOH X 255      27.412  22.426  10.077  0.00  0.00            
ATOM    813  HW2 HOH X 255      27.377  21.474   8.901  0.00  0.00            
ATOM    814  OW  HOH X 256      15.829  25.353  33.341  0.00  0.00            
ATOM    815  HW1 HOH X 256      15.856  24.546  32.828  0.00  0.00            
ATOM    816  HW2 HOH X 256      15.252  25.934  32.846  0.00  0.00            
ATOM    817  OW  HOH X 257      30.046  21.594  11.680  0.00  0.00            
ATOM    818  HW1 HOH X 257      29.762  20.917  12.294  0.00  0.00            
ATOM    819  HW2 HOH X 257      30.946  21.791  11.939  0.00  0.00            
ATOM    820  OW  HOH X 258      19.710  22.896  18.899  0.00  0.00            
ATOM    821  HW1 HOH X 258      19.988  23.461  19.620  0.00  0.00            
ATOM    822  HW2 HOH X 258      20.528  22.593  18.504  0.00  0.00            
ATOM    823  OW  HOH X 259      17.972  -0.366  25.011  0.00  0.00            
ATOM    824  HW1 HOH X 259      18.784  -0.745  25.347  0.00  0.00            
ATOM    825  HW2 HOH X 259      18.058   0.573  25.176  0.00  0.00            
ATOM    826  OW  HOH X 260      24.240  24.572  29.815  0.00  0.00            
ATOM    827  HW1 HOH X 260      24.941  24.371  30.435  0.00  0.00            
ATOM    828  HW2 HOH X 260      23.433  24.415  30.305  0.00  0.00            
ATOM    829  OW  HOH X 261      19.316  37.340  26.588  0.00  0.00            
ATOM    830  HW1 HOH X 261      19.680  38.046  26.054  0.00  0.00            
ATOM    831  HW2 HOH X 261      19.071  37.764  27.411  0.00  0.00            
ATOM    832  OW  HOH X 262      23.725  13.576  42.237  0.00  0.00            
ATOM    833  HW1 HOH X 262      24.052  13.029  41.522  0.00  0.00            
ATOM    834  HW2 HOH X 262      22.822  13.286  42.367  0.00  0.00            
ATOM    835  OW  HOH X 263      -5.924  16.253  16.529  0.00  0.00            
ATOM    836  HW1 HOH X 263      -6.033  17.198  16.635  0.00  0.00            
ATOM    837  HW2 HOH X 263      -5.147  16.162  15.977  0.00  0.00            
ATOM    838  OW  HOH X 264      25.305  24.155  17.923  0.00  0.00            
ATOM    839  HW1 HOH X 264      26.070  24.566  18.324  0.00  0.00            
ATOM    840  HW2 HOH X 264      25.450  23.215  18.037  0.00  0.00            
ATOM    841  OW  HOH X 265      13.238   1.846   4.222  0.00  0.00            
ATOM    842  HW1 HOH X 265      13.201   2.147   3.314  0.00  0.00            
ATOM    843  HW2 HOH X 265      13.670   0.994   4.175  0.00  0.00            
ATOM    844  OW  HOH X 266      24.666  23.001  15.227  0.00  0.00            
ATOM    845  HW1 HOH X 266      25.267  23.169  14.501  0.00  0.00            
ATOM    846  HW2 HOH X 266      25.046  23.475  15.967  0.00  0.00            
ATOM    847  OW  HOH X 267       7.705   6.004  33.992  0.00  0.00            
ATOM    848  HW1 HOH X 267       7.567   5.218  34.520  0.00  0.00            
ATOM    849  HW2 HOH X 267       8.656   6.090  33.933  0.00  0.00            
ATOM    850  OW  HOH X 268       3.957  20.494  17.898  0.00  0.00            
ATOM    851  HW1 HOH X 268       4.155  21.361  17.542  0.00  0.00            
ATOM    852  HW2 HOH X 268       3.264  20.651  18.540  0.00  0.00            
ATOM    853  OW  HOH X 269       5.571  15.098  22.843  0.00  0.00            
ATOM    854  HW1 HOH X 269       5.425  15.052  23.788  0.00  0.00            
ATOM    855  HW2 HOH X 269       4.896  15.697  22.524  0.00  0.00            
ATOM    856  OW  HOH X 270      35.865   7.742  33.677  0.00  0.00            
ATOM    857  HW1 HOH X 270      36.651   7.364  34.071  0.00  0.00            
ATOM    858  HW2 HOH X 270      35.870   7.420  32.775  0.00  0.00            
ATOM    859  OW  HOH X 271      10.280  -2.200  24.401  0.00  0.00            
ATOM    860  HW1 HOH X 271       9.573  -2.097  25.037  0.00  0.00            
ATOM    861  HW2 HOH X 271       9.837  -2.439  23.586  0.00  0.00            
ATOM    862  OW  HOH X 272       5.129  -0.435  28.327  0.00  0.00            
ATOM    863  HW1 HOH X 272       4.363   0.129  28.440  0.00  0.00            
ATOM    864  HW2 HOH X 272       5.459  -0.571  29.215  0.00  0.00            
ATOM    865  OW  HOH X 273      20.079  23.831  14.136  0.00  0.00            
ATOM    866  HW1 HOH X 273      20.761  23.164  14.207  0.00  0.00            
ATOM    867  HW2 HOH X 273      20.496  24.550  13.660  0.00  0.00            
ATOM    868  OW  HOH X 274       6.721   4.618  17.853  0.00  0.00            
ATOM    869  HW1 HOH X 274       6.636   4.850  18.777  0.00  0.00            
ATOM    870  HW2 HOH X 274       6.666   3.663  17.839  0.00  0.00            
ATOM    871  OW  HOH X 275       7.614  -2.584   8.650  0.00  0.00            
ATOM    872  HW1 HOH X 275       6.990  -2.204   8.031  0.00  0.00            
ATOM    873  HW2 HOH X 275       8.306  -2.951   8.099  0.00  0.00            
ATOM    874  OW  HOH X 276      -0.366  13.490  12.354  0.00  0.00            
ATOM    875  HW1 HOH X 276       0.151  12.686  12.316  0.00  0.00            
ATOM    876  HW2 HOH X 276       0.167  14.095  12.868  0.00  0.00            
ATOM    877  OW  HOH X 277       1.616   8.320  24.513  0.00  0.00            
ATOM    878  HW1 HOH X 277       1.566   8.772  23.670  0.00  0.00            
ATOM    879  HW2 HOH X 277       2.482   7.914  24.517  0.00  0.00            
ATOM    880  OW  HOH X 278      -5.209   1.497  27.988  0.00  0.00            
ATOM    881  HW1 HOH X 278      -5.104   1.235  27.073  0.00  0.00            
ATOM    882  HW2 HOH X 278      -5.424   2.429  27.947  0.00  0.00            
ATOM    883  OW  HOH X 279      20.035  17.102  39.424  0.00  0.00            
ATOM    884  HW1 HOH X 279      19.590  17.299  40.248  0.00  0.00            
ATOM    885  HW2 HOH X 279      20.563  16.327  39.615  0.00  0.00            
ATOM    886  OW  HOH X 280      10.040  10.603   4.279  0.00  0.00            
ATOM    887  HW1 HOH X 280      10.159   9.768   4.733  0.00  0.00            
ATOM    888  HW2 HOH X 280       9.346  10.433   3.642  0.00  0.00            
ATOM    889  OW  HOH X 281      17.154  -6.081  23.530  0.00  0.00            
ATOM    890  HW1 HOH X 281      17.546  -6.083  22.656  0.00  0.00            
ATOM    891  HW2 HOH X 281      16.236  -6.305  23.381  0.00  0.00            
ATOM    892  OW  HOH X 282      29.932  -1.082  24.845  0.00  0.00            
ATOM    893  HW1 HOH X 282      29.593  -1.972  24.940  0.00  0.00            
ATOM    894  HW2 HOH X 282      29.362  -0.677  24.191  0.00  0.00            
ATOM    895  OW  HOH X 283      26.377  28.869  18.183  0.00  0.00            
ATOM    896  HW1 HOH X 283      27.037  28.307  17.778  0.00  0.00            
ATOM    897  HW2 HOH X 283      25.728  28.261  18.537  0.00  0.00            
ATOM    898  OW  HOH X 284      35.885  13.910  28.871  0.00  0.00            
ATOM    899  HW1 HOH X 284      35.445  13.196  28.410  0.00  0.00            
ATOM    900  HW2 HOH X 284      35.956  14.608  28.219  0.00  0.00            
ATOM    901  OW  HOH X 285       9.418   1.318  12.367  0.00  0.00            
ATOM    902  HW1 HOH X 285       8.798   1.845  12.871  0.00  0.00            
ATOM    903  HW2 HOH X 285       9.099   1.367  11.466  0.00  0.00            
ATOM    904  OW  HOH X 286       5.253  -1.668  25.408  0.00  0.00            
ATOM    905  HW1 HOH X 286       5.377  -0.938  26.013  0.00  0.00            
ATOM    906  HW2 HOH X 286       6.103  -2.108  25.385  0.00  0.00            
ATOM    907  OW  HOH X 287      10.504   7.847   1.558  0.00  0.00            
ATOM    908  HW1 HOH X 287       9.996   7.262   2.120  0.00  0.00            
ATOM    909  HW2 HOH X 287       9.958   7.969   0.782  0.00  0.00            
ATOM    910  OW  HOH X 288      19.669   9.562  39.675  0.00  0.00            
ATOM    911  HW1 HOH X 288      18.793   9.224  39.489  0.00  0.00            
ATOM    912  HW2 HOH X 288      19.882   9.213  40.540  0.00  0.00            
ATOM    913  OW  HOH X 289      35.465  20.445  15.888  0.00  0.00            
ATOM    914  HW1 HOH X 289      35.862  21.128  16.429  0.00  0.00            
ATOM    915  HW2 HOH X 289      35.605  19.637  16.382  0.00  0.00            
ATOM    916  OW  HOH X 290       3.342  26.503  20.443  0.00  0.00            
ATOM    917  HW1 HOH X 290       3.206  26.337  19.510  0.00  0.00            
ATOM    918  HW2 HOH X 290       4.253  26.790  20.505  0.00  0.00            
ATOM    919  OW  HOH X 291      15.576   2.968  24.727  0.00  0.00            
ATOM    920  HW1 HOH X 291      16.105   2.292  25.152  0.00  0.00            
ATOM    921  HW2 HOH X 291      16.024   3.788  24.933  0.00  0.00            
ATOM    922  OW  HOH X 292      14.116  18.795  30.781  0.00  0.00            
ATOM    923  HW1 HOH X 292      13.235  18.427  30.717  0.00  0.00            
ATOM    924  HW2 HOH X 292      14.103  19.309  31.589  0.00  0.00            
ATOM    925  OW  HOH X 293      12.407  15.285  35.885  0.00  0.00            
ATOM    926  HW1 HOH X 293      12.419  14.333  35.783  0.00  0.00            
ATOM    927  HW2 HOH X 293      13.138  15.472  36.475  0.00  0.00            
ATOM    928  OW  HOH X 294       2.171   8.200  18.824  0.00  0.00            
ATOM    929  HW1 HOH X 294       2.907   7.594  18.908  0.00  0.00            
ATOM    930  HW2 HOH X 294       1.949   8.179  17.893  0.00  0.00            
ATOM    931  OW  HOH X 295       2.182   3.511  10.604  0.00  0.00            
ATOM    932  HW1 HOH X 295       2.149   4.440  10.376  0.00  0.00            
ATOM    933  HW2 HOH X 295       1.856   3.062   9.824  0.00  0.00            
ATOM    934  OW  HOH X 296      17.866  18.347  19.256  0.00  0.00            
ATOM    935  HW1 HOH X 296      17.663  18.761  18.417  0.00  0.00            
ATOM    936  HW2 HOH X 296      18.095  19.075  19.834  0.00  0.00            
ATOM    937  OW  HOH X 297      12.334  13.012  34.291  0.00  0.00            
ATOM    938  HW1 HOH X 297      11.877  12.171  34.293  0.00  0.00            
ATOM    939  HW2 HOH X 297      13.209  12.810  34.623  0.00  0.00            
ATOM    940  OW  HOH X 298      21.274   1.181  22.304  0.00  0.00            
ATOM    941  HW1 HOH X 298      21.953   0.961  21.666  0.00  0.00            
ATOM    942  HW2 HOH X 298      21.426   0.580  23.033  0.00  0.00            
ATOM    943  OW  HOH X 299      20.133  -1.441  16.122  0.00  0.00            
ATOM    944  HW1 HOH X 299      19.531  -0.709  15.986  0.00  0.00            
ATOM    945  HW2 HOH X 299      20.901  -1.222  15.595  0.00  0.00            
ATOM    946  OW  HOH X 300      19.927  10.829  20.216  0.00  0.00            
ATOM    947  HW1 HOH X 300      19.365  10.097  20.470  0.00  0.00            
ATOM    948  HW2 HOH X 300      20.346  11.105  21.031  0.00  0.00            
ATOM    949  OW  HOH X 301      25.946   6.385  17.713  0.00  0.00            
ATOM    950  HW1 HOH X 301      26.090   6.031  18.591  0.00  0.00            
ATOM    951  HW2 HOH X 301      25.649   7.283  17.862  0.00  0.00            
ATOM    952  OW  HOH X 302      14.869  13.205  36.215  0.00  0.00            
ATOM    953  HW1 HOH X 302      15.452  13.678  35.620  0.00  0.00            
ATOM    954  HW2 HOH X 302      14.719  13.813  36.938  0.00  0.00            
ATOM    955  OW  HOH X 303      12.228   7.462  31.518  0.00  0.00            
ATOM    956  HW1 HOH X 303      11.901   7.869  30.715  0.00  0.00            
ATOM    957  HW2 HOH X 303      12.508   6.588  31.246  0.00  0.00            
ATOM    958  OW  HOH X 304      19.666  21.660  24.628  0.00  0.00            
ATOM    959  HW1 HOH X 304      20.087  20.889  25.008  0.00  0.00            
ATOM    960  HW2 HOH X 304      18.850  21.756  25.121  0.00  0.00            
ATOM    961  OW  HOH X 305      -2.040   3.840  28.326  0.00  0.00            
ATOM    962  HW1 HOH X 305      -2.432   3.483  27.529  0.00  0.00            
ATOM    963  HW2 HOH X 305      -1.973   3.090  28.917  0.00  0.00            
ATOM    964  OW  HOH X 306       3.880  -6.428  23.058  0.00  0.00            
ATOM    965  HW1 HOH X 306       4.160  -6.390  23.973  0.00  0.00            
ATOM    966  HW2 HOH X 306       4.508  -7.017  22.640  0.00  0.00            
ATOM    967  OW  HOH X 307      23.478  30.703  29.916  0.00  0.00            
ATOM    968  HW1 HOH X 307      22.936  31.089  30.604  0.00  0.00            
ATOM    969  HW2 HOH X 307      23.755  31.448  29.383  0.00  0.00            
ATOM    970  OW  HOH X 308      11.304  -2.830   9.234  0.00  0.00            
ATOM    971  HW1 HOH X 308      10.563  -2.647   8.656  0.00  0.00            
ATOM    972  HW2 HOH X 308      11.863  -3.419   8.728  0.00  0.00            
ATOM    973  OW  HOH X 309      22.633   3.107  27.926  0.00  0.00            
ATOM    974  HW1 HOH X 309      23.049   3.733  28.518  0.00  0.00            
ATOM    975  HW2 HOH X 309      23.301   2.439  27.774  0.00  0.00            
ATOM    976  OW  HOH X 310      -6.078  11.653  13.289  0.00  0.00            
ATOM    977  HW1 HOH X 310      -6.255  11.197  12.466  0.00  0.00            
ATOM    978  HW2 HOH X 310      -5.169  11.942  13.213  0.00  0.00            
ATOM    979  OW  HOH X 311      21.044   5.786  33.315  0.00  0.00            
ATOM    980  HW1 HOH X 311      20.551   5.214  32.727  0.00  0.00            
ATOM    981  HW2 HOH X 311      21.116   5.289  34.130  0.00  0.00            
ATOM    982  OW  HOH X 312       6.620  20.392  22.930  0.00  0.00            
ATOM    983  HW1 HOH X 312       7.390  20.414  22.362  0.00  0.00            
ATOM    984  HW2 HOH X 312       6.910  20.805  23.743  0.00  0.00            
ATOM    985  OW  HOH X 313      28.377  27.053  21.026  0.00  0.00            
ATOM    986  HW1 HOH X 313      28.126  26.999  21.948  0.00  0.00            
ATOM    987  HW2 HOH X 313      27.941  26.306  20.615  0.00  0.00            
ATOM    988  OW  HOH X 314      15.772  26.354  17.212  0.00  0.00            
ATOM    989  HW1 HOH X 314      16.710  26.184  17.127  0.00  0.00            
ATOM    990  HW2 HOH X 314      15.701  27.309  17.223  0.00  0.00            
ATOM    991  OW  HOH X 315       3.358  16.582  20.813  0.00  0.00            
ATOM    992  HW1 HOH X 315       4.053  16.730  20.172  0.00  0.00            
ATOM    993  HW2 HOH X 315       2.782  15.940  20.398  0.00  0.00            
ATOM    994  OW  HOH X 316      22.100  22.187  14.246  0.00  0.00            
ATOM    995  HW1 HOH X 316      21.969  21.266  14.472  0.00  0.00            
ATOM    996  HW2 HOH X 316      23.028  22.346  14.418  0.00  0.00            
ATOM    997  OW  HOH X 317      25.188  19.360  37.597  0.00  0.00            
ATOM    998  HW1 HOH X 317      25.649  18.727  37.046  0.00  0.00            
ATOM    999  HW2 HOH X 317      24.437  18.876  37.941  0.00  0.00            
ATOM   1000  OW  HOH X 318      26.088  17.734  35.477  0.00  0.00            
ATOM   1001  HW1 HOH X 318      27.012  17.985  35.464  0.00  0.00            
ATOM   1002  HW2 HOH X 318      26.094  16.789  35.322  0.00  0.00            
ATOM   1003  OW  HOH X 319      10.533   6.143  21.780  0.00  0.00            
ATOM   1004  HW1 HOH X 319      10.561   5.336  21.265  0.00  0.00            
ATOM   1005  HW2 HOH X 319      10.009   6.746  21.253  0.00  0.00            
ATOM   1006  OW  HOH X 320       4.068   7.149  24.336  0.00  0.00            
ATOM   1007  HW1 HOH X 320       4.560   6.391  24.021  0.00  0.00            
ATOM   1008  HW2 HOH X 320       4.633   7.544  25.000  0.00  0.00            
ATOM   1009  OW  HOH X 321      23.642  21.910  24.351  0.00  0.00            
ATOM   1010  HW1 HOH X 321      23.029  22.324  24.958  0.00  0.00            
ATOM   1011  HW2 HOH X 321      23.321  22.152  23.482  0.00  0.00            
ATOM   1012  OW  HOH X 322      22.592  24.756  18.208  0.00  0.00            
ATOM   1013  HW1 HOH X 322      22.361  23.864  17.946  0.00  0.00            
ATOM   1014  HW2 HOH X 322      23.537  24.811  18.064  0.00  0.00            
ATOM   1015  OW  HOH X 323      30.416  24.737  22.752  0.00  0.00            
ATOM   1016  HW1 HOH X 323      30.599  24.325  21.908  0.00  0.00            
ATOM   1017  HW2 HOH X 323      29.952  24.064  23.252  0.00  0.00            
ATOM   1018  OW  HOH X 324       3.826  19.946  25.689  0.00  0.00            
ATOM   1019  HW1 HOH X 324       3.942  19.478  24.863  0.00  0.00            
ATOM   1020  HW2 HOH X 324       3.596  20.838  25.429  0.00  0.00            
ATOM   1021  OW  HOH X 325       9.540  14.218  25.637  0.00  0.00            
ATOM   1022  HW1 HOH X 325       9.032  14.834  26.163  0.00  0.00            
ATOM   1023  HW2 HOH X 325       9.718  14.688  24.822  0.00  0.00            
ATOM   1024  OW  HOH X 326       4.166  11.499  18.106  0.00  0.00            
ATOM   1025  HW1 HOH X 326       4.658  12.255  17.787  0.00  0.00            
ATOM   1026  HW2 HOH X 326       4.408  10.788  17.512  0.00  0.00            
ATOM   1027  OW  HOH X 327      25.644  12.134  37.345  0.00  0.00            
ATOM   1028  HW1 HOH X 327      26.483  11.677  37.403  0.00  0.00            
ATOM   1029  HW2 HOH X 327      25.277  11.858  36.505  0.00  0.00            
ATOM   1030  OW  HOH X 328      18.877   9.781   6.781  0.00  0.00            
ATOM   1031  HW1 HOH X 328      18.289   9.033   6.674  0.00  0.00            
ATOM   1032  HW2 HOH X 328      18.319  10.547   6.648  0.00  0.00            
ATOM   1033  OW  HOH X 329      19.722  14.611   9.274  0.00  0.00            
ATOM   1034  HW1 HOH X 329      20.242  14.061   8.689  0.00  0.00            
ATOM   1035  HW2 HOH X 329      20.213  14.619  10.096  0.00  0.00            
ATOM   1036  OW  HOH X 330      24.631  20.707   8.447  0.00  0.00            
ATOM   1037  HW1 HOH X 330      24.257  20.969   7.605  0.00  0.00            
ATOM   1038  HW2 HOH X 330      25.358  21.314   8.585  0.00  0.00            
ATOM   1039  OW  HOH X 331      25.357  18.880  12.997  0.00  0.00            
ATOM   1040  HW1 HOH X 331      24.707  18.756  13.689  0.00  0.00            
ATOM   1041  HW2 HOH X 331      25.303  18.082  12.471  0.00  0.00            
ATOM   1042  OW  HOH X 332      13.448   8.307  35.432  0.00  0.00            
ATOM   1043  HW1 HOH X 332      14.311   7.993  35.163  0.00  0.00            
ATOM   1044  HW2 HOH X 332      13.544   8.505  36.364  0.00  0.00            
ATOM   1045  OW  HOH X 333       8.997   9.739  12.063  0.00  0.00            
ATOM   1046  HW1 HOH X 333       9.218  10.510  12.586  0.00  0.00            
ATOM   1047  HW2 HOH X 333       8.213   9.383  12.481  0.00  0.00            
ATOM   1048  OW  HOH X 334       5.304   0.909   4.426  0.00  0.00            
ATOM   1049  HW1 HOH X 334       6.164   1.221   4.143  0.00  0.00            
ATOM   1050  HW2 HOH X 334       4.901   1.668   4.849  0.00  0.00            
ATOM   1051  OW  HOH X 335      26.330   0.440  24.347  0.00  0.00            
ATOM   1052  HW1 HOH X 335      26.946   0.357  25.076  0.00  0.00            
ATOM   1053  HW2 HOH X 335      26.846   0.824  23.639  0.00  0.00            
ATOM   1054  OW  HOH X 336       7.560  -6.354  20.885  0.00  0.00            
ATOM   1055  HW1 HOH X 336       6.852  -5.947  20.387  0.00  0.00            
ATOM   1056  HW2 HOH X 336       8.349  -5.890  20.605  0.00  0.00            
ATOM   1057  OW  HOH X 337      13.135  25.224  25.608  0.00  0.00            
ATOM   1058  HW1 HOH X 337      13.573  24.453  25.969  0.00  0.00            
ATOM   1059  HW2 HOH X 337      13.357  25.212  24.677  0.00  0.00            
ATOM   1060  OW  HOH X 338      10.012   4.941   0.250  0.00  0.00            
ATOM   1061  HW1 HOH X 338      10.254   4.058  -0.030  0.00  0.00            
ATOM   1062  HW2 HOH X 338       9.059   4.967   0.165  0.00  0.00            
ATOM   1063  OW  HOH X 339      28.356  22.558  26.383  0.00  0.00            
ATOM   1064  HW1 HOH X 339      27.992  23.105  27.079  0.00  0.00            
ATOM   1065  HW2 HOH X 339      28.907  21.922  26.840  0.00  0.00            
ATOM   1066  OW  HOH X 340       1.723  17.145  24.723  0.00  0.00            
ATOM   1067  HW1 HOH X 340       2.506  16.697  25.045  0.00  0.00            
ATOM   1068  HW2 HOH X 340       2.060  17.874  24.202  0.00  0.00            
ATOM   1069  OW  HOH X 341      17.724  10.657  30.451  0.00  0.00            
ATOM   1070  HW1 HOH X 341      18.121  10.250  31.221  0.00  0.00            
ATOM   1071  HW2 HOH X 341      18.468  10.959  29.930  0.00  0.00            
ATOM   1072  OW  HOH X 342       5.204  19.781  28.128  0.00  0.00            
ATOM   1073  HW1 HOH X 342       4.619  19.872  27.376  0.00  0.00            
ATOM   1074  HW2 HOH X 342       4.954  20.494  28.715  0.00  0.00            
ATOM   1075  OW  HOH X 343      14.830  12.689   5.005  0.00  0.00            
ATOM   1076  HW1 HOH X 343      14.543  13.594   4.883  0.00  0.00            
ATOM   1077  HW2 HOH X 343      14.041  12.165   4.866  0.00  0.00            
ATOM   1078  OW  HOH X 344      17.132  11.383  35.098  0.00  0.00            
ATOM   1079  HW1 HOH X 344      17.966  10.944  35.264  0.00  0.00            
ATOM   1080  HW2 HOH X 344      16.553  11.069  35.793  0.00  0.00            
ATOM   1081  OW  HOH X 345      28.544   6.926  17.752  0.00  0.00            
ATOM   1082  HW1 HOH X 345      27.623   6.745  17.565  0.00  0.00            
ATOM   1083  HW2 HOH X 345      28.554   7.835  18.050  0.00  0.00            
ATOM   1084  OW  HOH X 346      32.238  -0.897  22.991  0.00  0.00            
ATOM   1085  HW1 HOH X 346      32.125  -0.256  22.289  0.00  0.00            
ATOM   1086  HW2 HOH X 346      31.362  -1.004  23.362  0.00  0.00            
ATOM   1087  OW  HOH X 347      15.341  26.950  28.581  0.00  0.00            
ATOM   1088  HW1 HOH X 347      15.388  27.320  27.699  0.00  0.00            
ATOM   1089  HW2 HOH X 347      16.254  26.823  28.837  0.00  0.00            
ATOM   1090  OW  HOH X 348       6.688  14.290  30.312  0.00  0.00            
ATOM   1091  HW1 HOH X 348       6.011  13.635  30.144  0.00  0.00            
ATOM   1092  HW2 HOH X 348       7.170  14.355  29.487  0.00  0.00            
ATOM   1093  OW  HOH X 349       9.388  -8.847  22.826  0.00  0.00            
ATOM   1094  HW1 HOH X 349      10.154  -9.321  23.149  0.00  0.00            
ATOM   1095  HW2 HOH X 349       8.811  -8.776  23.586  0.00  0.00            
ATOM   1096  OW  HOH X 350      20.712  24.319  21.584  0.00  0.00            
ATOM   1097  HW1 HOH X 350      20.531  24.258  22.522  0.00  0.00            
ATOM   1098  HW2 HOH X 350      20.921  25.242  21.439  0.00  0.00            
ATOM   1099  OW  HOH X 351      13.296  17.657   9.269  0.00  0.00            
ATOM   1100  HW1 HOH X 351      12.553  17.612   8.666  0.00  0.00            
ATOM   1101  HW2 HOH X 351      14.055  17.433   8.731  0.00  0.00            
ATOM   1102  OW  HOH X 352      17.665  25.925  20.357  0.00  0.00            
ATOM   1103  HW1 HOH X 352      18.296  26.464  19.881  0.00  0.00            
ATOM   1104  HW2 HOH X 352      16.814  26.311  20.149  0.00  0.00            
ATOM   1105  OW  HOH X 353      24.597  17.137  23.758  0.00  0.00            
ATOM   1106  HW1 HOH X 353      24.483  17.061  24.705  0.00  0.00            
ATOM   1107  HW2 HOH X 353      24.633  18.080  23.596  0.00  0.00            
ATOM   1108  OW  HOH X 354      35.623  18.777  21.593  0.00  0.00            
ATOM   1109  HW1 HOH X 354      36.403  18.755  22.148  0.00  0.00            
ATOM   1110  HW2 HOH X 354      35.763  18.077  20.955  0.00  0.00            
ATOM   1111  OW  HOH X 355      11.786  -0.712  31.698  0.00  0.00            
ATOM   1112  HW1 HOH X 355      12.501  -0.553  32.314  0.00  0.00            
ATOM   1113  HW2 HOH X 355      11.353  -1.498  32.030  0.00  0.00            
ATOM   1114  OW  HOH X 356       8.252   1.916  15.669  0.00  0.00            
ATOM   1115  HW1 HOH X 356       9.208   1.946  15.629  0.00  0.00            
ATOM   1116  HW2 HOH X 356       7.964   2.379  14.883  0.00  0.00            
ATOM   1117  OW  HOH X 357      -0.532   0.183  28.440  0.00  0.00            
ATOM   1118  HW1 HOH X 357       0.198   0.519  28.959  0.00  0.00            
ATOM   1119  HW2 HOH X 357      -0.279  -0.714  28.221  0.00  0.00            
ATOM   1120  OW  HOH X 358      20.992  14.312  11.786  0.00  0.00            
ATOM   1121  HW1 HOH X 358      20.685  13.465  12.112  0.00  0.00            
ATOM   1122  HW2 HOH X 358      20.999  14.878  12.557  0.00  0.00            
ATOM   1123  OW  HOH X 359      18.935   0.013  29.181  0.00  0.00            
ATOM   1124  HW1 HOH X 359      19.407  -0.148  29.998  0.00  0.00            
ATOM   1125  HW2 HOH X 359      19.287   0.844  28.861  0.00  0.00            
ATOM   1126  OW  HOH X 360       2.560   1.418  35.821  0.00  0.00            
ATOM   1127  HW1 HOH X 360       1.864   2.075  35.808  0.00  0.00            
ATOM   1128  HW2 HOH X 360       2.549   1.074  36.714  0.00  0.00            
ATOM   1129  OW  HOH X 361      17.298  20.566  10.097  0.00  0.00            
ATOM   1130  HW1 HOH X 361      18.190  20.239  10.215  0.00  0.00            
ATOM   1131  HW2 HOH X 361      16.738  19.820  10.311  0.00  0.00            
ATOM   1132  OW  HOH X 362       8.191   7.303  24.864  0.00  0.00            
ATOM   1133  HW1 HOH X 362       9.105   7.393  24.591  0.00  0.00            
ATOM   1134  HW2 HOH X 362       8.230   6.775  25.661  0.00  0.00            
ATOM   1135  OW  HOH X 363      29.883  21.181   5.909  0.00  0.00            
ATOM   1136  HW1 HOH X 363      29.160  21.309   5.295  0.00  0.00            
ATOM   1137  HW2 HOH X 363      29.523  21.433   6.760  0.00  0.00            
ATOM   1138  OW  HOH X 364      12.246  14.927   7.731  0.00  0.00            
ATOM   1139  HW1 HOH X 364      13.119  14.562   7.876  0.00  0.00            
ATOM   1140  HW2 HOH X 364      12.403  15.845   7.513  0.00  0.00            
ATOM   1141  OW  HOH X 365      16.811   8.861  17.702  0.00  0.00            
ATOM   1142  HW1 HOH X 365      16.400   8.907  16.839  0.00  0.00            
ATOM   1143  HW2 HOH X 365      17.157   9.741  17.850  0.00  0.00            
ATOM   1144  OW  HOH X 366       7.253   3.022  13.249  0.00  0.00            
ATOM   1145  HW1 HOH X 366       7.704   3.861  13.153  0.00  0.00            
ATOM   1146  HW2 HOH X 366       6.533   3.063  12.620  0.00  0.00            
ATOM   1147  OW  HOH X 367       6.214  12.798  21.641  0.00  0.00            
ATOM   1148  HW1 HOH X 367       5.878  13.642  21.943  0.00  0.00            
ATOM   1149  HW2 HOH X 367       6.862  13.024  20.973  0.00  0.00            
ATOM   1150  OW  HOH X 368      35.211  19.493  11.394  0.00  0.00            
ATOM   1151  HW1 HOH X 368      35.543  20.372  11.212  0.00  0.00            
ATOM   1152  HW2 HOH X 368      34.809  19.213  10.572  0.00  0.00            
ATOM   1153  OW  HOH X 369      30.442  17.793  17.563  0.00  0.00            
ATOM   1154  HW1 HOH X 369      31.082  18.345  17.114  0.00  0.00            
ATOM   1155  HW2 HOH X 369      29.723  17.701  16.938  0.00  0.00            
ATOM   1156  OW  HOH X 370      23.574   0.850  20.943  0.00  0.00            
ATOM   1157  HW1 HOH X 370      24.255   1.249  20.402  0.00  0.00            
ATOM   1158  HW2 HOH X 370      24.053   0.390  21.633  0.00  0.00            
ATOM   1159  OW  HOH X 371      36.949   8.473  25.869  0.00  0.00            
ATOM   1160  HW1 HOH X 371      36.823   8.679  26.795  0.00  0.00            
ATOM   1161  HW2 HOH X 371      37.768   8.910  25.634  0.00  0.00            
ATOM   1162  OW  HOH X 372       7.986  -6.078   9.590  0.00  0.00            
ATOM   1163  HW1 HOH X 372       8.879  -6.041   9.246  0.00  0.00            
ATOM   1164  HW2 HOH X 372       7.678  -5.172   9.556  0.00  0.00            
ATOM   1165  OW  HOH X 373      22.999   6.790  17.532  0.00  0.00            
ATOM   1166  HW1 HOH X 373      23.258   7.575  17.050  0.00  0.00            
ATOM   1167  HW2 HOH X 373      22.654   7.122  18.362  0.00  0.00            
ATOM   1168  OW  HOH X 374      17.141  -0.846  19.711  0.00  0.00            
ATOM   1169  HW1 HOH X 374      17.989  -1.009  19.297  0.00  0.00            
ATOM   1170  HW2 HOH X 374      17.353  -0.371  20.514  0.00  0.00            
ATOM   1171  OW  HOH X 375       1.238  14.903  26.700  0.00  0.00            
ATOM   1172  HW1 HOH X 375       1.618  15.413  25.984  0.00  0.00            
ATOM   1173  HW2 HOH X 375       1.552  14.011  26.552  0.00  0.00            
ATOM   1174  OW  HOH X 376      25.606   7.993  10.320  0.00  0.00            
ATOM   1175  HW1 HOH X 376      25.303   7.624  11.149  0.00  0.00            
ATOM   1176  HW2 HOH X 376      26.293   8.611  10.569  0.00  0.00            
ATOM   1177  OW  HOH X 377      -2.337  17.916  16.925  0.00  0.00            
ATOM   1178  HW1 HOH X 377      -3.012  18.031  16.256  0.00  0.00            
ATOM   1179  HW2 HOH X 377      -1.695  17.333  16.519  0.00  0.00            
ATOM   1180  OW  HOH X 378      -3.445  13.310  23.278  0.00  0.00            
ATOM   1181  HW1 HOH X 378      -2.647  13.384  23.801  0.00  0.00            
ATOM   1182  HW2 HOH X 378      -3.200  12.747  22.545  0.00  0.00            
ATOM   1183  OW  HOH X 379      33.150  18.399  13.507  0.00  0.00            
ATOM   1184  HW1 HOH X 379      32.554  17.794  13.067  0.00  0.00            
ATOM   1185  HW2 HOH X 379      33.902  18.466  12.918  0.00  0.00            
ATOM   1186  OW  HOH X 380      20.550   8.446  33.798  0.00  0.00            
ATOM   1187  HW1 HOH X 380      21.099   8.452  34.582  0.00  0.00            
ATOM   1188  HW2 HOH X 380      20.511   7.525  33.540  0.00  0.00            
ATOM   1189  OW  HOH X 381      12.960   5.248  29.972  0.00  0.00            
ATOM   1190  HW1 HOH X 381      13.702   5.801  29.728  0.00  0.00            
ATOM   1191  HW2 HOH X 381      13.330   4.369  30.049  0.00  0.00            
ATOM   1192  OW  HOH X 382       5.180   8.123  35.819  0.00  0.00            
ATOM   1193  HW1 HOH X 382       5.216   8.961  35.358  0.00  0.00            
ATOM   1194  HW2 HOH X 382       4.426   7.672  35.440  0.00  0.00            
ATOM   1195  OW  HOH X 383      13.883 -12.449  15.696  0.00  0.00            
ATOM   1196  HW1 HOH X 383      13.630 -12.292  14.787  0.00  0.00            
ATOM   1197  HW2 HOH X 383      13.961 -11.574  16.077  0.00  0.00            
ATOM   1198  OW  HOH X 384      15.464   3.396   8.603  0.00  0.00            
ATOM   1199  HW1 HOH X 384      16.132   3.791   9.163  0.00  0.00            
ATOM   1200  HW2 HOH X 384      14.682   3.356   9.153  0.00  0.00            
ATOM   1201  OW  HOH X 385      19.022  24.127  23.883  0.00  0.00            
ATOM   1202  HW1 HOH X 385      19.182  23.193  24.019  0.00  0.00            
ATOM   1203  HW2 HOH X 385      19.714  24.564  24.379  0.00  0.00            
ATOM   1204  OW  HOH X 386      18.307  15.675  31.013  0.00  0.00            
ATOM   1205  HW1 HOH X 386      19.144  15.621  31.474  0.00  0.00            
ATOM   1206  HW2 HOH X 386      18.402  15.078  30.272  0.00  0.00            
ATOM   1207  OW  HOH X 387      13.043  10.877  37.012  0.00  0.00            
ATOM   1208  HW1 HOH X 387      13.145  10.063  37.505  0.00  0.00            
ATOM   1209  HW2 HOH X 387      13.825  11.386  37.226  0.00  0.00            
ATOM   1210  OW  HOH X 388      11.075   1.937  22.806  0.00  0.00            
ATOM   1211  HW1 HOH X 388      11.578   1.498  23.492  0.00  0.00            
ATOM   1212  HW2 HOH X 388      11.236   1.415  22.020  0.00  0.00            
ATOM   1213  OW  HOH X 389      25.888  14.286  23.558  0.00  0.00            
ATOM   1214  HW1 HOH X 389      26.643  14.415  24.133  0.00  0.00            
ATOM   1215  HW2 HOH X 389      25.447  15.136  23.546  0.00  0.00            
ATOM   1216  OW  HOH X 390      32.436  14.045  13.294  0.00  0.00            
ATOM   1217  HW1 HOH X 390      32.048  13.606  12.537  0.00  0.00            
ATOM   1218  HW2 HOH X 390      33.196  14.507  12.940  0.00  0.00            
ATOM   1219  OW  HOH X 391       7.073  12.761  24.530  0.00  0.00            
ATOM   1220  HW1 HOH X 391       6.709  12.904  23.656  0.00  0.00            
ATOM   1221  HW2 HOH X 391       7.990  12.536  24.374  0.00  0.00            
ATOM   1222  OW  HOH X 392      15.463  22.244  23.459  0.00  0.00            
ATOM   1223  HW1 HOH X 392      15.876  21.520  22.987  0.00  0.00            
ATOM   1224  HW2 HOH X 392      16.070  22.977  23.351  0.00  0.00            
ATOM   1225  OW  HOH X 393       8.750 -10.084  16.924  0.00  0.00            
ATOM   1226  HW1 HOH X 393       8.497 -10.139  17.845  0.00  0.00            
ATOM   1227  HW2 HOH X 393       9.707 -10.055  16.939  0.00  0.00            
ATOM   1228  OW  HOH X 394      29.324  16.565  20.210  0.00  0.00            
ATOM   1229  HW1 HOH X 394      29.978  17.151  19.829  0.00  0.00            
ATOM   1230  HW2 HOH X 394      29.805  15.758  20.397  0.00  0.00            
ATOM   1231  OW  HOH X 395      19.773  29.941  20.434  0.00  0.00            
ATOM   1232  HW1 HOH X 395      19.941  29.525  19.589  0.00  0.00            
ATOM   1233  HW2 HOH X 395      19.034  29.453  20.799  0.00  0.00            
ATOM   1234  OW  HOH X 396      29.160  12.557  28.558  0.00  0.00            
ATOM   1235  HW1 HOH X 396      28.325  12.783  28.969  0.00  0.00            
ATOM   1236  HW2 HOH X 396      29.606  13.395  28.445  0.00  0.00            
ATOM   1237  OW  HOH X 397       1.437  17.438  12.087  0.00  0.00            
ATOM   1238  HW1 HOH X 397       0.830  17.680  12.786  0.00  0.00            
ATOM   1239  HW2 HOH X 397       0.891  16.997  11.436  0.00  0.00            
ATOM   1240  OW  HOH X 398      13.884   5.851  38.165  0.00  0.00            
ATOM   1241  HW1 HOH X 398      14.104   5.094  38.708  0.00  0.00            
ATOM   1242  HW2 HOH X 398      14.504   5.812  37.437  0.00  0.00            
ATOM   1243  OW  HOH X 399       2.717  18.922  22.630  0.00  0.00            
ATOM   1244  HW1 HOH X 399       2.989  19.782  22.309  0.00  0.00            
ATOM   1245  HW2 HOH X 399       3.020  18.309  21.959  0.00  0.00            
ATOM   1246  OW  HOH X 400      21.346  11.530  22.324  0.00  0.00            
ATOM   1247  HW1 HOH X 400      22.144  12.044  22.197  0.00  0.00            
ATOM   1248  HW2 HOH X 400      20.689  12.171  22.595  0.00  0.00            
ATOM   1249  OW  HOH X 401       7.003  27.417  22.839  0.00  0.00            
ATOM   1250  HW1 HOH X 401       7.698  26.797  23.062  0.00  0.00            
ATOM   1251  HW2 HOH X 401       6.896  27.951  23.626  0.00  0.00            
ATOM   1252  OW  HOH X 402      18.362  -2.950  21.450  0.00  0.00            
ATOM   1253  HW1 HOH X 402      17.746  -2.388  21.920  0.00  0.00            
ATOM   1254  HW2 HOH X 402      19.104  -3.044  22.047  0.00  0.00            
ATOM   1255  OW  HOH X 403       8.702  -5.590  27.376  0.00  0.00            
ATOM   1256  HW1 HOH X 403       9.244  -5.593  26.587  0.00  0.00            
ATOM   1257  HW2 HOH X 403       9.298  -5.321  28.075  0.00  0.00            
ATOM   1258  OW  HOH X 404      18.463   4.264  35.038  0.00  0.00            
ATOM   1259  HW1 HOH X 404      17.839   3.652  35.427  0.00  0.00            
ATOM   1260  HW2 HOH X 404      18.250   4.262  34.105  0.00  0.00            
ATOM   1261  OW  HOH X 405      18.032  13.598  29.175  0.00  0.00            
ATOM   1262  HW1 HOH X 405      18.765  12.998  29.311  0.00  0.00            
ATOM   1263  HW2 HOH X 405      18.014  13.745  28.229  0.00  0.00            
ATOM   1264  OW  HOH X 406       8.497   5.334  12.422  0.00  0.00            
ATOM   1265  HW1 HOH X 406       8.218   6.055  12.987  0.00  0.00            
ATOM   1266  HW2 HOH X 406       8.991   5.757  11.719  0.00  0.00            
ATOM   1267  OW  HOH X 407      25.351  24.303  25.219  0.00  0.00            
ATOM   1268  HW1 HOH X 407      25.901  24.300  24.436  0.00  0.00            
ATOM   1269  HW2 HOH X 407      24.809  23.519  25.135  0.00  0.00            
ATOM   1270  OW  HOH X 408      16.940  -1.650  14.840  0.00  0.00            
ATOM   1271  HW1 HOH X 408      17.299  -1.283  14.032  0.00  0.00            
ATOM   1272  HW2 HOH X 408      16.483  -0.918  15.254  0.00  0.00            
ATOM   1273  OW  HOH X 409      31.375   3.789  22.528  0.00  0.00            
ATOM   1274  HW1 HOH X 409      32.097   4.089  23.081  0.00  0.00            
ATOM   1275  HW2 HOH X 409      31.201   4.524  21.940  0.00  0.00            
ATOM   1276  OW  HOH X 410      10.536  11.845  13.510  0.00  0.00            
ATOM   1277  HW1 HOH X 410      11.370  11.927  13.046  0.00  0.00            
ATOM   1278  HW2 HOH X 410      10.306  12.743  13.749  0.00  0.00            
ATOM   1279  OW  HOH X 411      -2.497  -0.746  35.825  0.00  0.00            
ATOM   1280  HW1 HOH X 411      -3.315  -1.204  35.633  0.00  0.00            
ATOM   1281  HW2 HOH X 411      -2.753   0.171  35.925  0.00  0.00            
ATOM   1282  OW  HOH X 412      15.991  -3.537  16.832  0.00  0.00            
ATOM   1283  HW1 HOH X 412      16.726  -3.336  17.412  0.00  0.00            
ATOM   1284  HW2 HOH X 412      16.123  -2.970  16.072  0.00  0.00            
ATOM   1285  OW  HOH X 413      10.093  -1.088   7.174  0.00  0.00            
ATOM   1286  HW1 HOH X 413      10.711  -1.344   6.489  0.00  0.00            
ATOM   1287  HW2 HOH X 413       9.245  -1.050   6.731  0.00  0.00            
ATOM   1288  OW  HOH X 414      16.141   2.576  15.322  0.00  0.00            
ATOM   1289  HW1 HOH X 414      16.230   2.962  14.451  0.00  0.00            
ATOM   1290  HW2 HOH X 414      15.842   1.681  15.159  0.00  0.00            
ATOM   1291  OW  HOH X 415      13.381  21.240  11.415  0.00  0.00            
ATOM   1292  HW1 HOH X 415      14.222  21.648  11.211  0.00  0.00            
ATOM   1293  HW2 HOH X 415      13.267  21.381  12.355  0.00  0.00            
ATOM   1294  OW  HOH X 416      17.411   2.224  18.678  0.00  0.00            
ATOM   1295  HW1 HOH X 416      16.858   2.357  19.448  0.00  0.00            
ATOM   1296  HW2 HOH X 416      18.104   1.636  18.979  0.00  0.00            
ATOM   1297  OW  HOH X 417      26.825  31.441  19.696  0.00  0.00            
ATOM   1298  HW1 HOH X 417      27.022  30.730  19.087  0.00  0.00            
ATOM   1299  HW2 HOH X 417      27.335  31.235  20.479  0.00  0.00            
ATOM   1300  OW  HOH X 418      12.846  -2.839  11.456  0.00  0.00            
ATOM   1301  HW1 HOH X 418      12.134  -2.934  10.824  0.00  0.00            
ATOM   1302  HW2 HOH X 418      12.542  -3.308  12.233  0.00  0.00            
ATOM   1303  OW  HOH X 419       8.575  19.302  28.636  0.00  0.00            
ATOM   1304  HW1 HOH X 419       8.582  18.850  29.480  0.00  0.00            
ATOM   1305  HW2 HOH X 419       8.734  20.220  28.855  0.00  0.00            
ATOM   1306  OW  HOH X 420      11.533  -4.870  18.864  0.00  0.00            
ATOM   1307  HW1 HOH X 420      11.985  -5.169  18.076  0.00  0.00            
ATOM   1308  HW2 HOH X 420      10.607  -4.863  18.621  0.00  0.00            
ATOM   1309  OW  HOH X 421       8.372   3.703   9.964  0.00  0.00            
ATOM   1310  HW1 HOH X 421       9.102   3.358   9.450  0.00  0.00            
ATOM   1311  HW2 HOH X 421       8.788   4.201  10.668  0.00  0.00            
ATOM   1312  OW  HOH X 422      -1.338  13.387  25.172  0.00  0.00            
ATOM   1313  HW1 HOH X 422      -0.681  13.927  24.732  0.00  0.00            
ATOM   1314  HW2 HOH X 422      -1.749  13.977  25.803  0.00  0.00            
ATOM   1315  OW  HOH X 423      40.175  10.251  21.697  0.00  0.00            
ATOM   1316  HW1 HOH X 423      40.534   9.537  21.170  0.00  0.00            
ATOM   1317  HW2 HOH X 423      39.230  10.203  21.553  0.00  0.00            
ATOM   1318  OW  HOH X 424      27.528  16.767  43.845  0.00  0.00            
ATOM   1319  HW1 HOH X 424      26.783  16.504  43.304  0.00  0.00            
ATOM   1320  HW2 HOH X 424      27.474  16.205  44.618  0.00  0.00            
ATOM   1321  OW  HOH X 425      13.619   1.059  27.046  0.00  0.00            
ATOM   1322  HW1 HOH X 425      13.048   1.826  26.997  0.00  0.00            
ATOM   1323  HW2 HOH X 425      13.373   0.527  26.290  0.00  0.00            
ATOM   1324  OW  HOH X 426      28.720  11.609  14.705  0.00  0.00            
ATOM   1325  HW1 HOH X 426      29.262  11.165  14.053  0.00  0.00            
ATOM   1326  HW2 HOH X 426      29.321  11.804  15.424  0.00  0.00            
ATOM   1327  OW  HOH X 427      17.624  -0.674   8.934  0.00  0.00            
ATOM   1328  HW1 HOH X 427      16.679  -0.825   8.913  0.00  0.00            
ATOM   1329  HW2 HOH X 427      17.796  -0.125   8.170  0.00  0.00            
ATOM   1330  OW  HOH X 428      -0.290   5.583  21.163  0.00  0.00            
ATOM   1331  HW1 HOH X 428      -0.987   6.173  21.449  0.00  0.00            
ATOM   1332  HW2 HOH X 428      -0.637   5.166  20.374  0.00  0.00            
ATOM   1333  OW  HOH X 429      29.549  22.569  15.214  0.00  0.00            
ATOM   1334  HW1 HOH X 429      30.359  22.073  15.098  0.00  0.00            
ATOM   1335  HW2 HOH X 429      28.862  21.903  15.242  0.00  0.00            
ATOM   1336  OW  HOH X 430      12.238  -2.367  19.623  0.00  0.00            
ATOM   1337  HW1 HOH X 430      13.180  -2.237  19.516  0.00  0.00            
ATOM   1338  HW2 HOH X 430      12.139  -3.310  19.757  0.00  0.00            
ATOM   1339  OW  HOH X 431      13.121   0.050  24.097  0.00  0.00            
ATOM   1340  HW1 HOH X 431      13.633   0.192  23.301  0.00  0.00            
ATOM   1341  HW2 HOH X 431      13.077  -0.902  24.187  0.00  0.00            
ATOM   1342  OW  HOH X 432      -0.646   6.001  27.585  0.00  0.00            
ATOM   1343  HW1 HOH X 432      -1.210   5.266  27.826  0.00  0.00            
ATOM   1344  HW2 HOH X 432      -0.025   6.074  28.309  0.00  0.00            
ATOM   1345  OW  HOH X 433      20.247  17.773  41.978  0.00  0.00            
ATOM   1346  HW1 HOH X 433      19.984  18.641  42.285  0.00  0.00            
ATOM   1347  HW2 HOH X 433      21.176  17.865  41.766  0.00  0.00            
ATOM   1348  OW  HOH X 434      31.407   9.229  15.299  0.00  0.00            
ATOM   1349  HW1 HOH X 434      32.338   9.439  15.224  0.00  0.00            
ATOM   1350  HW2 HOH X 434      30.997   9.695  14.570  0.00  0.00            
ATOM   1351  OW  HOH X 435      12.388 -15.472  15.932  0.00  0.00            
ATOM   1352  HW1 HOH X 435      12.146 -14.547  15.976  0.00  0.00            
ATOM   1353  HW2 HOH X 435      11.856 -15.891  16.609  0.00  0.00            
ATOM   1354  OW  HOH X 436      24.750  13.642  32.830  0.00  0.00            
ATOM   1355  HW1 HOH X 436      24.264  14.465  32.777  0.00  0.00            
ATOM   1356  HW2 HOH X 436      24.479  13.153  32.053  0.00  0.00            
ATOM   1357  OW  HOH X 437      21.532  22.440  38.636  0.00  0.00            
ATOM   1358  HW1 HOH X 437      22.402  22.706  38.338  0.00  0.00            
ATOM   1359  HW2 HOH X 437      21.701  21.801  39.329  0.00  0.00            
ATOM   1360  OW  HOH X 438      35.222   3.954  28.627  0.00  0.00            
ATOM   1361  HW1 HOH X 438      35.041   4.890  28.534  0.00  0.00            
ATOM   1362  HW2 HOH X 438      35.261   3.810  29.572  0.00  0.00            
ATOM   1363  OW  HOH X 439      33.328  24.503  18.482  0.00  0.00            
ATOM   1364  HW1 HOH X 439      33.308  24.183  17.580  0.00  0.00            
ATOM   1365  HW2 HOH X 439      34.251  24.692  18.649  0.00  0.00            
ATOM   1366  OW  HOH X 440      21.929  23.648  31.266  0.00  0.00            
ATOM   1367  HW1 HOH X 440      21.622  24.418  31.745  0.00  0.00            
ATOM   1368  HW2 HOH X 440      21.728  22.911  31.842  0.00  0.00            
ATOM   1369  OW  HOH X 441      20.256  -8.061  18.725  0.00  0.00            
ATOM   1370  HW1 HOH X 441      20.982  -8.499  18.281  0.00  0.00            
ATOM   1371  HW2 HOH X 441      20.543  -7.984  19.635  0.00  0.00            
ATOM   1372  OW  HOH X 442       9.553 -13.108  16.544  0.00  0.00            
ATOM   1373  HW1 HOH X 442       9.304 -12.231  16.251  0.00  0.00            
ATOM   1374  HW2 HOH X 442       9.807 -13.566  15.743  0.00  0.00            
ATOM   1375  OW  HOH X 443       6.842  14.817  32.993  0.00  0.00            
ATOM   1376  HW1 HOH X 443       6.997  14.716  32.054  0.00  0.00            
ATOM   1377  HW2 HOH X 443       7.252  15.653  33.215  0.00  0.00            
ATOM   1378  OW  HOH X 444      34.625  12.217  16.279  0.00  0.00            
ATOM   1379  HW1 HOH X 444      34.139  11.967  15.493  0.00  0.00            
ATOM   1380  HW2 HOH X 444      34.294  13.088  16.499  0.00  0.00            
ATOM   1381  OW  HOH X 445      18.722  13.503  16.318  0.00  0.00            
ATOM   1382  HW1 HOH X 445      17.845  13.886  16.289  0.00  0.00            
ATOM   1383  HW2 HOH X 445      18.680  12.861  17.026  0.00  0.00            
ATOM   1384  OW  HOH X 446      11.755   1.815   6.339  0.00  0.00            
ATOM   1385  HW1 HOH X 446      12.245   1.379   7.037  0.00  0.00            
ATOM   1386  HW2 HOH X 446      12.359   1.832   5.597  0.00  0.00            
ATOM   1387  OW  HOH X 447      11.278   6.970  27.210  0.00  0.00            
ATOM   1388  HW1 HOH X 447      11.448   7.175  28.129  0.00  0.00            
ATOM   1389  HW2 HOH X 447      11.922   6.298  26.990  0.00  0.00            
ATOM   1390  OW  HOH X 448      20.320  15.092  14.402  0.00  0.00            
ATOM   1391  HW1 HOH X 448      20.727  15.656  15.059  0.00  0.00            
ATOM   1392  HW2 HOH X 448      19.618  14.643  14.872  0.00  0.00            
ATOM   1393  OW  HOH X 449       0.705   7.208  29.934  0.00  0.00            
ATOM   1394  HW1 HOH X 449       1.406   7.854  30.025  0.00  0.00            
ATOM   1395  HW2 HOH X 449       0.223   7.258  30.759  0.00  0.00            
ATOM   1396  OW  HOH X 450       7.766   9.652   7.927  0.00  0.00            
ATOM   1397  HW1 HOH X 450       8.191  10.510   7.947  0.00  0.00            
ATOM   1398  HW2 HOH X 450       8.482   9.027   8.037  0.00  0.00            
ATOM   1399  OW  HOH X 451       9.564  11.984  32.148  0.00  0.00            
ATOM   1400  HW1 HOH X 451       8.930  12.123  32.851  0.00  0.00            
ATOM   1401  HW2 HOH X 451      10.320  11.587  32.580  0.00  0.00            
ATOM   1402  OW  HOH X 452      14.334  -9.139  16.799  0.00  0.00            
ATOM   1403  HW1 HOH X 452      14.350  -8.606  16.004  0.00  0.00            
ATOM   1404  HW2 HOH X 452      14.914  -8.681  17.407  0.00  0.00            
ATOM   1405  OW  HOH X 453      21.811   9.189  12.823  0.00  0.00            
ATOM   1406  HW1 HOH X 453      22.731   9.264  13.073  0.00  0.00            
ATOM   1407  HW2 HOH X 453      21.413   8.671  13.523  0.00  0.00            
ATOM   1408  OW  HOH X 454      29.367  18.481  33.516  0.00  0.00            
ATOM   1409  HW1 HOH X 454      28.545  18.371  33.038  0.00  0.00            
ATOM   1410  HW2 HOH X 454      29.170  19.138  34.184  0.00  0.00            
ATOM   1411  OW  HOH X 455       7.406  10.367  20.938  0.00  0.00            
ATOM   1412  HW1 HOH X 455       6.787  11.072  21.126  0.00  0.00            
ATOM   1413  HW2 HOH X 455       6.856   9.612  20.731  0.00  0.00            
ATOM   1414  OW  HOH X 456       6.838   0.076  33.489  0.00  0.00            
ATOM   1415  HW1 HOH X 456       7.545   0.718  33.556  0.00  0.00            
ATOM   1416  HW2 HOH X 456       6.679  -0.201  34.391  0.00  0.00            
ATOM   1417  OW  HOH X 457      32.731  22.024  12.966  0.00  0.00            
ATOM   1418  HW1 HOH X 457      32.377  21.294  13.474  0.00  0.00            
ATOM   1419  HW2 HOH X 457      33.647  22.083  13.237  0.00  0.00            
ATOM   1420  OW  HOH X 458       8.995  17.049  30.484  0.00  0.00            
ATOM   1421  HW1 HOH X 458       8.067  17.060  30.714  0.00  0.00            
ATOM   1422  HW2 HOH X 458       9.315  16.210  30.815  0.00  0.00            
ATOM   1423  OW  HOH X 459       2.116  -3.982  28.871  0.00  0.00            
ATOM   1424  HW1 HOH X 459       1.770  -4.863  29.017  0.00  0.00            
ATOM   1425  HW2 HOH X 459       2.715  -3.836  29.603  0.00  0.00            
ATOM   1426  OW  HOH X 460      25.494  16.702  11.414  0.00  0.00            
ATOM   1427  HW1 HOH X 460      25.588  17.400  10.766  0.00  0.00            
ATOM   1428  HW2 HOH X 460      25.753  15.907  10.949  0.00  0.00            
ATOM   1429  OW  HOH X 461       5.841   9.850  23.430  0.00  0.00            
ATOM   1430  HW1 HOH X 461       6.721  10.102  23.153  0.00  0.00            
ATOM   1431  HW2 HOH X 461       5.962   9.473  24.302  0.00  0.00            
ATOM   1432  OW  HOH X 462      29.206  14.706  13.079  0.00  0.00            
ATOM   1433  HW1 HOH X 462      28.871  14.085  13.726  0.00  0.00            
ATOM   1434  HW2 HOH X 462      29.387  14.172  12.306  0.00  0.00            
ATOM   1435  OW  HOH X 463      12.995  12.209  11.920  0.00  0.00            
ATOM   1436  HW1 HOH X 463      13.344  13.074  11.707  0.00  0.00            
ATOM   1437  HW2 HOH X 463      12.866  11.786  11.071  0.00  0.00            
ATOM   1438  OW  HOH X 464      13.216  -3.082  16.243  0.00  0.00            
ATOM   1439  HW1 HOH X 464      12.881  -3.937  15.972  0.00  0.00            
ATOM   1440  HW2 HOH X 464      13.895  -3.284  16.886  0.00  0.00            
ATOM   1441  OW  HOH X 465       9.157  -4.179   7.152  0.00  0.00            
ATOM   1442  HW1 HOH X 465       9.684  -4.822   7.625  0.00  0.00            
ATOM   1443  HW2 HOH X 465       9.214  -4.449   6.235  0.00  0.00            
ATOM   1444  OW  HOH X 466      25.725  18.535   9.387  0.00  0.00            
ATOM   1445  HW1 HOH X 466      25.354  19.380   9.131  0.00  0.00            
ATOM   1446  HW2 HOH X 466      26.644  18.588   9.127  0.00  0.00            
ATOM   1447  OW  HOH X 467      28.815  12.832  11.026  0.00  0.00            
ATOM   1448  HW1 HOH X 467      28.764  12.746  10.074  0.00  0.00            
ATOM   1449  HW2 HOH X 467      27.910  12.976  11.303  0.00  0.00            
ATOM   1450  OW  HOH X 468      16.340  14.663  17.236  0.00  0.00            
ATOM   1451  HW1 HOH X 468      15.887  14.338  16.458  0.00  0.00            
ATOM   1452  HW2 HOH X 468      16.193  13.989  17.899  0.00  0.00            
ATOM   1453  OW  HOH X 469       2.824   9.557  29.985  0.00  0.00            
ATOM   1454  HW1 HOH X 469       2.187  10.271  30.026  0.00  0.00            
ATOM   1455  HW2 HOH X 469       2.930   9.384  29.049  0.00  0.00            
ATOM   1456  OW  HOH X 470       3.836  18.415  12.278  0.00  0.00            
ATOM   1457  HW1 HOH X 470       2.955  18.110  12.063  0.00  0.00            
ATOM   1458  HW2 HOH X 470       3.918  18.268  13.220  0.00  0.00            
ATOM   1459  OW  HOH X 471       8.236  12.376  19.454  0.00  0.00            
ATOM   1460  HW1 HOH X 471       7.958  11.508  19.745  0.00  0.00            
ATOM   1461  HW2 HOH X 471       9.104  12.236  19.076  0.00  0.00            
ATOM   1462  OW  HOH X 472      28.099  12.891  25.458  0.00  0.00            
ATOM   1463  HW1 HOH X 472      28.661  13.453  25.991  0.00  0.00            
ATOM   1464  HW2 HOH X 472      27.455  12.541  26.074  0.00  0.00            
ATOM   1465  OW  HOH X 473      -3.509  15.443  18.004  0.00  0.00            
ATOM   1466  HW1 HOH X 473      -3.115  16.288  17.786  0.00  0.00            
ATOM   1467  HW2 HOH X 473      -3.361  14.902  17.228  0.00  0.00            
ATOM   1468  OW  HOH X 474      25.059  20.128  43.725  0.00  0.00            
ATOM   1469  HW1 HOH X 474      24.825  21.054  43.670  0.00  0.00            
ATOM   1470  HW2 HOH X 474      24.428  19.686  43.157  0.00  0.00            
ATOM   1471  OW  HOH X 475       3.743   4.220  32.449  0.00  0.00            
ATOM   1472  HW1 HOH X 475       3.899   5.108  32.128  0.00  0.00            
ATOM   1473  HW2 HOH X 475       3.533   4.333  33.376  0.00  0.00            
ATOM   1474  OW  HOH X 476      -7.995   9.335  21.151  0.00  0.00            
ATOM   1475  HW1 HOH X 476      -8.630   9.753  20.569  0.00  0.00            
ATOM   1476  HW2 HOH X 476      -7.346  10.016  21.326  0.00  0.00            
ATOM   1477  OW  HOH X 477      15.525  21.147  15.328  0.00  0.00            
ATOM   1478  HW1 HOH X 477      16.086  21.702  14.785  0.00  0.00            
ATOM   1479  HW2 HOH X 477      15.724  20.255  15.046  0.00  0.00            
ATOM   1480  OW  HOH X 478      -0.662   7.782  14.918  0.00  0.00            
ATOM   1481  HW1 HOH X 478      -0.736   7.267  15.721  0.00  0.00            
ATOM   1482  HW2 HOH X 478      -0.547   7.131  14.226  0.00  0.00            
ATOM   1483  OW  HOH X 479      25.593  13.242  19.871  0.00  0.00            
ATOM   1484  HW1 HOH X 479      25.958  13.739  19.138  0.00  0.00            
ATOM   1485  HW2 HOH X 479      26.298  13.213  20.517  0.00  0.00            
ATOM   1486  OW  HOH X 480      -0.855  15.015  21.127  0.00  0.00            
ATOM   1487  HW1 HOH X 480      -0.392  14.725  21.913  0.00  0.00            
ATOM   1488  HW2 HOH X 480      -0.497  14.474  20.424  0.00  0.00            
ATOM   1489  OW  HOH X 481      -5.519   6.616  25.495  0.00  0.00            
ATOM   1490  HW1 HOH X 481      -5.703   6.507  24.562  0.00  0.00            
ATOM   1491  HW2 HOH X 481      -4.901   7.346  25.534  0.00  0.00            
ATOM   1492  OW  HOH X 482      14.039  18.628  26.325  0.00  0.00            
ATOM   1493  HW1 HOH X 482      13.457  18.745  25.574  0.00  0.00            
ATOM   1494  HW2 HOH X 482      14.884  18.968  26.030  0.00  0.00            
ATOM   1495  OW  HOH X 483      14.429  15.218  37.835  0.00  0.00            
ATOM   1496  HW1 HOH X 483      15.195  15.792  37.847  0.00  0.00            
ATOM   1497  HW2 HOH X 483      14.194  15.112  38.757  0.00  0.00            
ATOM   1498  OW  HOH X 484       9.915   0.460  25.655  0.00  0.00            
ATOM   1499  HW1 HOH X 484      10.371  -0.248  25.200  0.00  0.00            
ATOM   1500  HW2 HOH X 484      10.511   1.207  25.596  0.00  0.00            
ATOM   1501  OW  HOH X 485       9.574  22.625  22.070  0.00  0.00            
ATOM   1502  HW1 HOH X 485       9.047  22.266  21.356  0.00  0.00            
ATOM   1503  HW2 HOH X 485      10.146  21.903  22.333  0.00  0.00            
ATOM   1504  OW  HOH X 486       8.760   5.955  27.120  0.00  0.00            
ATOM   1505  HW1 HOH X 486       9.097   5.261  27.686  0.00  0.00            
ATOM   1506  HW2 HOH X 486       9.514   6.522  26.959  0.00  0.00            
ATOM   1507  OW  HOH X 487      21.427   6.075  23.393  0.00  0.00            
ATOM   1508  HW1 HOH X 487      21.435   5.743  24.291  0.00  0.00            
ATOM   1509  HW2 HOH X 487      22.224   6.601  23.325  0.00  0.00            
ATOM   1510  OW  HOH X 488      24.539  24.883  21.668  0.00  0.00            
ATOM   1511  HW1 HOH X 488      25.481  25.026  21.758  0.00  0.00            
ATOM   1512  HW2 HOH X 488      24.172  25.761  21.570  0.00  0.00            
ATOM   1513  OW  HOH X 489      12.457  11.263   9.240  0.00  0.00            
ATOM   1514  HW1 HOH X 489      12.454  11.563   8.331  0.00  0.00            
ATOM   1515  HW2 HOH X 489      13.317  10.860   9.357  0.00  0.00            
ATOM   1516  OW  HOH X 490      26.805   9.218  14.565  0.00  0.00            
ATOM   1517  HW1 HOH X 490      27.392   8.498  14.333  0.00  0.00            
ATOM   1518  HW2 HOH X 490      27.338   9.795  15.112  0.00  0.00            
ATOM   1519  OW  HOH X 491      28.309   7.060  21.120  0.00  0.00            
ATOM   1520  HW1 HOH X 491      27.794   7.383  20.380  0.00  0.00            
ATOM   1521  HW2 HOH X 491      27.835   7.365  21.894  0.00  0.00            
ATOM   1522  OW  HOH X 492       7.863  19.615  13.599  0.00  0.00            
ATOM   1523  HW1 HOH X 492       8.334  20.290  13.111  0.00  0.00            
ATOM   1524  HW2 HOH X 492       7.161  20.087  14.046  0.00  0.00            
ATOM   1525  OW  HOH X 493      19.106  12.372   2.953  0.00  0.00            
ATOM   1526  HW1 HOH X 493      19.797  12.611   2.335  0.00  0.00            
ATOM   1527  HW2 HOH X 493      18.322  12.278   2.411  0.00  0.00            
ATOM   1528  OW  HOH X 494      13.642  18.763  18.152  0.00  0.00            
ATOM   1529  HW1 HOH X 494      13.912  19.312  18.889  0.00  0.00            
ATOM   1530  HW2 HOH X 494      13.889  17.876  18.411  0.00  0.00            
ATOM   1531  OW  HOH X 495      15.459  -0.627  28.385  0.00  0.00            
ATOM   1532  HW1 HOH X 495      14.728  -0.085  28.090  0.00  0.00            
ATOM   1533  HW2 HOH X 495      15.590  -1.259  27.678  0.00  0.00            
ATOM   1534  OW  HOH X 496       9.698  10.311  24.718  0.00  0.00            
ATOM   1535  HW1 HOH X 496      10.196  10.686  23.992  0.00  0.00            
ATOM   1536  HW2 HOH X 496      10.015   9.411  24.788  0.00  0.00            
ATOM   1537  OW  HOH X 497      20.472  18.377  30.248  0.00  0.00            
ATOM   1538  HW1 HOH X 497      19.727  18.803  29.823  0.00  0.00            
ATOM   1539  HW2 HOH X 497      21.180  19.018  30.190  0.00  0.00            
ATOM   1540  OW  HOH X 498      17.346  21.347  33.875  0.00  0.00            
ATOM   1541  HW1 HOH X 498      17.004  20.614  34.387  0.00  0.00            
ATOM   1542  HW2 HOH X 498      17.231  22.110  34.441  0.00  0.00            
ATOM   1543  OW  HOH X 499      33.232  20.331  21.479  0.00  0.00            
ATOM   1544  HW1 HOH X 499      33.356  20.569  20.560  0.00  0.00            
ATOM   1545  HW2 HOH X 499      33.867  19.631  21.633  0.00  0.00            
ATOM   1546  OW  HOH X 500      21.837  12.867  15.257  0.00  0.00            
ATOM   1547  HW1 HOH X 500      21.782  12.907  16.212  0.00  0.00            
ATOM   1548  HW2 HOH X 500      21.153  13.463  14.952  0.00  0.00            
ATOM   1549  OW  HOH X 501      11.759  21.832  25.774  0.00  0.00            
ATOM   1550  HW1 HOH X 501      11.469  21.076  26.284  0.00  0.00            
ATOM   1551  HW2 HOH X 501      10.965  22.350  25.639  0.00  0.00            
ATOM   1552  OW  HOH X 502      10.008  14.512  30.936  0.00  0.00            
ATOM   1553  HW1 HOH X 502       9.683  13.720  31.363  0.00  0.00            
ATOM   1554  HW2 HOH X 502       9.987  14.306  30.001  0.00  0.00            
ATOM   1555  OW  HOH X 503      14.248   2.817  30.205  0.00  0.00            
ATOM   1556  HW1 HOH X 503      15.050   2.512  29.780  0.00  0.00            
ATOM   1557  HW2 HOH X 503      13.563   2.240  29.867  0.00  0.00            
ATOM   1558  OW  HOH X 504      21.564  14.050  30.236  0.00  0.00            
ATOM   1559  HW1 HOH X 504      21.659  14.706  30.927  0.00  0.00            
ATOM   1560  HW2 HOH X 504      21.308  14.552  29.462  0.00  0.00            
ATOM   1561  OW  HOH X 505      33.870  14.743  25.551  0.00  0.00            
ATOM   1562  HW1 HOH X 505      33.755  13.870  25.174  0.00  0.00            
ATOM   1563  HW2 HOH X 505      33.076  14.889  26.064  0.00  0.00            
ATOM   1564  OW  HOH X 506      26.063   1.789  19.076  0.00  0.00            
ATOM   1565  HW1 HOH X 506      25.819   0.964  18.656  0.00  0.00            
ATOM   1566  HW2 HOH X 506      26.651   2.212  18.451  0.00  0.00            
ATOM   1567  OW  HOH X 507      34.734  11.618  27.742  0.00  0.00            
ATOM   1568  HW1 HOH X 507      34.265  11.079  27.105  0.00  0.00            
ATOM   1569  HW2 HOH X 507      35.634  11.294  27.714  0.00  0.00            
ATOM   1570  OW  HOH X 508      12.355   4.622   5.886  0.00  0.00            
ATOM   1571  HW1 HOH X 508      13.277   4.876   5.835  0.00  0.00            
ATOM   1572  HW2 HOH X 508      12.372   3.667   5.938  0.00  0.00            
ATOM   1573  OW  HOH X 509      15.138  13.057  29.236  0.00  0.00            
ATOM   1574  HW1 HOH X 509      14.876  12.240  29.660  0.00  0.00            
ATOM   1575  HW2 HOH X 509      16.094  13.058  29.286  0.00  0.00            
ATOM   1576  OW  HOH X 510      20.623  32.590  26.909  0.00  0.00            
ATOM   1577  HW1 HOH X 510      20.543  33.375  27.452  0.00  0.00            
ATOM   1578  HW2 HOH X 510      20.370  31.872  27.489  0.00  0.00            
ATOM   1579  OW  HOH X 511       2.984   6.442  14.454  0.00  0.00            
ATOM   1580  HW1 HOH X 511       3.595   6.449  13.717  0.00  0.00            
ATOM   1581  HW2 HOH X 511       3.105   5.582  14.858  0.00  0.00            
ATOM   1582  OW  HOH X 512      20.965  12.547  42.188  0.00  0.00            
ATOM   1583  HW1 HOH X 512      21.527  11.808  41.951  0.00  0.00            
ATOM   1584  HW2 HOH X 512      21.101  12.660  43.128  0.00  0.00            
ATOM   1585  OW  HOH X 513      11.873   8.258  11.849  0.00  0.00            
ATOM   1586  HW1 HOH X 513      11.803   7.432  12.327  0.00  0.00            
ATOM   1587  HW2 HOH X 513      10.985   8.615  11.854  0.00  0.00            
ATOM   1588  OW  HOH X 514      18.635  14.858  26.655  0.00  0.00            
ATOM   1589  HW1 HOH X 514      19.151  15.424  27.229  0.00  0.00            
ATOM   1590  HW2 HOH X 514      19.268  14.234  26.301  0.00  0.00            
ATOM   1591  OW  HOH X 515      17.135  22.992  13.336  0.00  0.00            
ATOM   1592  HW1 HOH X 515      17.948  23.142  13.819  0.00  0.00            
ATOM   1593  HW2 HOH X 515      16.532  23.656  13.670  0.00  0.00            
ATOM   1594  OW  HOH X 516       9.006   0.033  31.496  0.00  0.00            
ATOM   1595  HW1 HOH X 516       9.892  -0.268  31.294  0.00  0.00            
ATOM   1596  HW2 HOH X 516       8.658  -0.628  32.093  0.00  0.00            
ATOM   1597  OW  HOH X 517      33.424  12.993  19.563  0.00  0.00            
ATOM   1598  HW1 HOH X 517      33.188  13.919  19.612  0.00  0.00            
ATOM   1599  HW2 HOH X 517      33.097  12.618  20.380  0.00  0.00            
ATOM   1600  OW  HOH X 518      26.189  21.557  17.943  0.00  0.00            
ATOM   1601  HW1 HOH X 518      25.531  20.865  17.882  0.00  0.00            
ATOM   1602  HW2 HOH X 518      26.945  21.212  17.467  0.00  0.00            
ATOM   1603  OW  HOH X 519      23.072   8.062  20.333  0.00  0.00            
ATOM   1604  HW1 HOH X 519      23.613   8.820  20.550  0.00  0.00            
ATOM   1605  HW2 HOH X 519      23.427   7.352  20.869  0.00  0.00            
ATOM   1606  OW  HOH X 520      31.516   5.231  30.772  0.00  0.00            
ATOM   1607  HW1 HOH X 520      31.362   4.591  31.468  0.00  0.00            
ATOM   1608  HW2 HOH X 520      30.727   5.773  30.766  0.00  0.00            
ATOM   1609  OW  HOH X 521      11.174 -10.913  20.927  0.00  0.00            
ATOM   1610  HW1 HOH X 521      11.654 -10.930  21.755  0.00  0.00            
ATOM   1611  HW2 HOH X 521      10.280 -11.158  21.163  0.00  0.00            
ATOM   1612  OW  HOH X 522      10.935   8.670  29.430  0.00  0.00            
ATOM   1613  HW1 HOH X 522      10.064   8.690  29.827  0.00  0.00            
ATOM   1614  HW2 HOH X 522      10.941   9.414  28.828  0.00  0.00            
ATOM   1615  OW  HOH X 523      27.796  14.623   7.511  0.00  0.00            
ATOM   1616  HW1 HOH X 523      28.657  15.026   7.626  0.00  0.00            
ATOM   1617  HW2 HOH X 523      27.986  13.733   7.214  0.00  0.00            
ATOM   1618  OW  HOH X 524      24.364  29.565  24.079  0.00  0.00            
ATOM   1619  HW1 HOH X 524      23.539  30.016  24.261  0.00  0.00            
ATOM   1620  HW2 HOH X 524      24.721  29.360  24.943  0.00  0.00            
ATOM   1621  OW  HOH X 525       0.842  -0.717  19.251  0.00  0.00            
ATOM   1622  HW1 HOH X 525       0.833   0.170  19.610  0.00  0.00            
ATOM   1623  HW2 HOH X 525       0.111  -0.734  18.633  0.00  0.00            
ATOM   1624  OW  HOH X 526      22.087  19.449  14.321  0.00  0.00            
ATOM   1625  HW1 HOH X 526      22.025  18.964  13.498  0.00  0.00            
ATOM   1626  HW2 HOH X 526      22.359  18.794  14.965  0.00  0.00            
ATOM   1627  OW  HOH X 527      12.570  -4.293   7.151  0.00  0.00            
ATOM   1628  HW1 HOH X 527      12.351  -3.698   6.434  0.00  0.00            
ATOM   1629  HW2 HOH X 527      13.527  -4.298   7.175  0.00  0.00            
ATOM   1630  OW  HOH X 528      28.697   4.551  25.090  0.00  0.00            
ATOM   1631  HW1 HOH X 528      29.135   5.199  25.642  0.00  0.00            
ATOM   1632  HW2 HOH X 528      28.832   3.719  25.544  0.00  0.00            
ATOM   1633  OW  HOH X 529      27.411  27.044  23.721  0.00  0.00            
ATOM   1634  HW1 HOH X 529      27.525  26.119  23.940  0.00  0.00            
ATOM   1635  HW2 HOH X 529      26.696  27.054  23.085  0.00  0.00            
ATOM   1636  OW  HOH X 530       4.936   4.884  -1.839  0.00  0.00            
ATOM   1637  HW1 HOH X 530       4.030   4.642  -1.646  0.00  0.00            
ATOM   1638  HW2 HOH X 530       4.969   5.828  -1.685  0.00  0.00            
ATOM   1639  OW  HOH X 531      22.479  33.596  22.382  0.00  0.00            
ATOM   1640  HW1 HOH X 531      22.152  34.209  21.724  0.00  0.00            
ATOM   1641  HW2 HOH X 531      21.706  33.104  22.659  0.00  0.00            
ATOM   1642  OW  HOH X 532      19.339   3.241  23.351  0.00  0.00            
ATOM   1643  HW1 HOH X 532      20.017   2.586  23.188  0.00  0.00            
ATOM   1644  HW2 HOH X 532      19.785   4.081  23.242  0.00  0.00            
ATOM   1645  OW  HOH X 533      19.733  17.382   9.062  0.00  0.00            
ATOM   1646  HW1 HOH X 533      19.840  16.443   8.913  0.00  0.00            
ATOM   1647  HW2 HOH X 533      19.305  17.443   9.916  0.00  0.00            
ATOM   1648  OW  HOH X 534      27.015   8.262  35.210  0.00  0.00            
ATOM   1649  HW1 HOH X 534      27.114   9.176  34.947  0.00  0.00            
ATOM   1650  HW2 HOH X 534      27.911   7.945  35.323  0.00  0.00            
ATOM   1651  OW  HOH X 535      -3.409  15.337  14.027  0.00  0.00            
ATOM   1652  HW1 HOH X 535      -3.120  14.437  13.879  0.00  0.00            
ATOM   1653  HW2 HOH X 535      -2.640  15.781  14.384  0.00  0.00            
ATOM   1654  OW  HOH X 536      21.579  18.105  11.747  0.00  0.00            
ATOM   1655  HW1 HOH X 536      21.547  17.233  11.355  0.00  0.00            
ATOM   1656  HW2 HOH X 536      22.117  18.619  11.145  0.00  0.00            
ATOM   1657  OW  HOH X 537      35.402  22.275  13.849  0.00  0.00            
ATOM   1658  HW1 HOH X 537      35.162  22.001  14.734  0.00  0.00            
ATOM   1659  HW2 HOH X 537      36.358  22.317  13.862  0.00  0.00            
ATOM   1660  OW  HOH X 538       4.803   3.155  11.714  0.00  0.00            
ATOM   1661  HW1 HOH X 538       5.114   3.752  11.034  0.00  0.00            
ATOM   1662  HW2 HOH X 538       3.849   3.235  11.685  0.00  0.00            
ATOM   1663  OW  HOH X 539      -1.489  23.413  18.611  0.00  0.00            
ATOM   1664  HW1 HOH X 539      -1.314  22.556  18.223  0.00  0.00            
ATOM   1665  HW2 HOH X 539      -2.244  23.269  19.181  0.00  0.00            
ATOM   1666  OW  HOH X 540       9.789  26.216  25.572  0.00  0.00            
ATOM   1667  HW1 HOH X 540      10.737  26.222  25.435  0.00  0.00            
ATOM   1668  HW2 HOH X 540       9.446  25.688  24.851  0.00  0.00            
ATOM   1669  OW  HOH X 541      34.007   8.120  30.601  0.00  0.00            
ATOM   1670  HW1 HOH X 541      33.749   8.809  29.989  0.00  0.00            
ATOM   1671  HW2 HOH X 541      33.217   7.593  30.716  0.00  0.00            
ATOM   1672  OW  HOH X 542      15.931  10.283  37.386  0.00  0.00            
ATOM   1673  HW1 HOH X 542      16.246   9.514  37.861  0.00  0.00            
ATOM   1674  HW2 HOH X 542      16.288  11.028  37.871  0.00  0.00            
ATOM   1675  OW  HOH X 543      13.224   3.113  10.438  0.00  0.00            
ATOM   1676  HW1 HOH X 543      12.910   2.385  10.974  0.00  0.00            
ATOM   1677  HW2 HOH X 543      13.245   3.860  11.035  0.00  0.00            
ATOM   1678  OW  HOH X 544      14.065  10.187  26.720  0.00  0.00            
ATOM   1679  HW1 HOH X 544      13.288   9.642  26.594  0.00  0.00            
ATOM   1680  HW2 HOH X 544      13.725  11.012  27.069  0.00  0.00            
ATOM   1681  OW  HOH X 545      34.194   1.592  24.707  0.00  0.00            
ATOM   1682  HW1 HOH X 545      33.596   2.242  24.339  0.00  0.00            
ATOM   1683  HW2 HOH X 545      34.957   1.612  24.128  0.00  0.00            
ATOM   1684  OW  HOH X 546      21.716   2.571  13.857  0.00  0.00            
ATOM   1685  HW1 HOH X 546      21.070   3.020  14.402  0.00  0.00            
ATOM   1686  HW2 HOH X 546      21.203   1.952  13.337  0.00  0.00            
ATOM   1687  OW  HOH X 547      23.387  17.094  44.563  0.00  0.00            
ATOM   1688  HW1 HOH X 547      24.341  17.121  44.639  0.00  0.00            
ATOM   1689  HW2 HOH X 547      23.213  17.304  43.646  0.00  0.00            
ATOM   1690  OW  HOH X 548      12.223  17.005  21.024  0.00  0.00            
ATOM   1691  HW1 HOH X 548      11.318  17.106  21.320  0.00  0.00            
ATOM   1692  HW2 HOH X 548      12.217  17.319  20.120  0.00  0.00            
ATOM   1693  OW  HOH X 549      11.340   4.497  37.871  0.00  0.00            
ATOM   1694  HW1 HOH X 549      12.084   5.024  37.582  0.00  0.00            
ATOM   1695  HW2 HOH X 549      10.684   5.138  38.144  0.00  0.00            
ATOM   1696  OW  HOH X 550      -2.237  12.170   9.836  0.00  0.00            
ATOM   1697  HW1 HOH X 550      -1.368  12.082  10.228  0.00  0.00            
ATOM   1698  HW2 HOH X 550      -2.663  11.331  10.008  0.00  0.00            
ATOM   1699  OW  HOH X 551      11.362  29.948  21.177  0.00  0.00            
ATOM   1700  HW1 HOH X 551      10.786  30.078  21.931  0.00  0.00            
ATOM   1701  HW2 HOH X 551      12.210  30.289  21.462  0.00  0.00            
ATOM   1702  OW  HOH X 552      11.005  16.461  28.127  0.00  0.00            
ATOM   1703  HW1 HOH X 552      10.190  16.540  28.622  0.00  0.00            
ATOM   1704  HW2 HOH X 552      11.424  15.674  28.477  0.00  0.00            
ATOM   1705  OW  HOH X 553       3.379  -9.537  25.690  0.00  0.00            
ATOM   1706  HW1 HOH X 553       3.605  -8.759  26.199  0.00  0.00            
ATOM   1707  HW2 HOH X 553       2.424  -9.584  25.734  0.00  0.00            
ATOM   1708  OW  HOH X 554      10.688   5.626  34.029  0.00  0.00            
ATOM   1709  HW1 HOH X 554      11.630   5.586  34.196  0.00  0.00            
ATOM   1710  HW2 HOH X 554      10.497   4.829  33.536  0.00  0.00            
ATOM   1711  OW  HOH X 555      34.978  13.056  22.919  0.00  0.00            
ATOM   1712  HW1 HOH X 555      34.839  12.117  22.794  0.00  0.00            
ATOM   1713  HW2 HOH X 555      34.105  13.441  22.842  0.00  0.00            
ATOM   1714  OW  HOH X 556       1.011  -2.695  23.964  0.00  0.00            
ATOM   1715  HW1 HOH X 556       1.373  -2.122  24.640  0.00  0.00            
ATOM   1716  HW2 HOH X 556       1.059  -3.573  24.343  0.00  0.00            
ATOM   1717  OW  HOH X 557      13.197  17.450  33.920  0.00  0.00            
ATOM   1718  HW1 HOH X 557      14.085  17.103  33.835  0.00  0.00            
ATOM   1719  HW2 HOH X 557      13.060  17.531  34.864  0.00  0.00            
ATOM   1720  OW  HOH X 558      25.930  12.076  11.558  0.00  0.00            
ATOM   1721  HW1 HOH X 558      25.272  11.523  11.979  0.00  0.00            
ATOM   1722  HW2 HOH X 558      25.430  12.804  11.189  0.00  0.00            
ATOM   1723  OW  HOH X 559      19.384  29.779  25.803  0.00  0.00            
ATOM   1724  HW1 HOH X 559      20.068  30.253  26.275  0.00  0.00            
ATOM   1725  HW2 HOH X 559      19.085  29.111  26.421  0.00  0.00            
ATOM   1726  OW  HOH X 560      15.878  16.472  27.043  0.00  0.00            
ATOM   1727  HW1 HOH X 560      16.140  16.651  27.946  0.00  0.00            
ATOM   1728  HW2 HOH X 560      15.193  17.115  26.860  0.00  0.00            
ATOM   1729  OW  HOH X 561       6.681  -0.024  19.577  0.00  0.00            
ATOM   1730  HW1 HOH X 561       7.165  -0.831  19.751  0.00  0.00            
ATOM   1731  HW2 HOH X 561       5.840  -0.147  20.017  0.00  0.00            
ATOM   1732  OW  HOH X 562      -0.445  20.406  20.799  0.00  0.00            
ATOM   1733  HW1 HOH X 562      -0.494  19.475  21.017  0.00  0.00            
ATOM   1734  HW2 HOH X 562       0.475  20.635  20.930  0.00  0.00            
ATOM   1735  OW  HOH X 563      27.040  23.802  13.876  0.00  0.00            
ATOM   1736  HW1 HOH X 563      27.787  24.384  13.731  0.00  0.00            
ATOM   1737  HW2 HOH X 563      27.429  22.936  13.996  0.00  0.00            
ATOM   1738  OW  HOH X 564      20.469  11.505  12.333  0.00  0.00            
ATOM   1739  HW1 HOH X 564      19.560  11.310  12.560  0.00  0.00            
ATOM   1740  HW2 HOH X 564      20.934  10.680  12.473  0.00  0.00            
ATOM   1741  OW  HOH X 565      18.127  -3.135  27.502  0.00  0.00            
ATOM   1742  HW1 HOH X 565      17.690  -3.515  26.740  0.00  0.00            
ATOM   1743  HW2 HOH X 565      18.513  -2.321  27.175  0.00  0.00            
ATOM   1744  OW  HOH X 566      28.805  14.945  34.968  0.00  0.00            
ATOM   1745  HW1 HOH X 566      29.004  15.786  35.380  0.00  0.00            
ATOM   1746  HW2 HOH X 566      29.573  14.753  34.431  0.00  0.00            
ATOM   1747  OW  HOH X 567      15.015  15.440  24.235  0.00  0.00            
ATOM   1748  HW1 HOH X 567      14.935  14.986  23.396  0.00  0.00            
ATOM   1749  HW2 HOH X 567      14.133  15.765  24.416  0.00  0.00            
ATOM   1750  OW  HOH X 568      23.690   1.240  25.702  0.00  0.00            
ATOM   1751  HW1 HOH X 568      23.844   1.163  26.643  0.00  0.00            
ATOM   1752  HW2 HOH X 568      24.252   0.570  25.311  0.00  0.00            
ATOM   1753  OW  HOH X 569      33.273  15.124  22.657  0.00  0.00            
ATOM   1754  HW1 HOH X 569      32.853  15.156  21.797  0.00  0.00            
ATOM   1755  HW2 HOH X 569      32.570  15.324  23.275  0.00  0.00            
ATOM   1756  OW  HOH X 570      18.482  19.950  28.882  0.00  0.00            
ATOM   1757  HW1 HOH X 570      17.638  20.095  29.310  0.00  0.00            
ATOM   1758  HW2 HOH X 570      18.521  20.617  28.196  0.00  0.00            
ATOM   1759  OW  HOH X 571      16.556   2.427  21.738  0.00  0.00            
ATOM   1760  HW1 HOH X 571      15.959   2.614  22.462  0.00  0.00            
ATOM   1761  HW2 HOH X 571      17.229   1.865  22.122  0.00  0.00            
ATOM   1762  OW  HOH X 572      15.843  28.884  18.177  0.00  0.00            
ATOM   1763  HW1 HOH X 572      16.550  29.528  18.135  0.00  0.00            
ATOM   1764  HW2 HOH X 572      15.103  29.364  18.548  0.00  0.00            
ATOM   1765  OW  HOH X 573      14.549   0.671  21.612  0.00  0.00            
ATOM   1766  HW1 HOH X 573      14.450   0.598  20.663  0.00  0.00            
ATOM   1767  HW2 HOH X 573      15.230   1.333  21.733  0.00  0.00            
ATOM   1768  OW  HOH X 574      14.435  -3.645  22.105  0.00  0.00            
ATOM   1769  HW1 HOH X 574      15.227  -3.301  22.518  0.00  0.00            
ATOM   1770  HW2 HOH X 574      14.590  -3.542  21.166  0.00  0.00            
ATOM   1771  OW  HOH X 575      23.540  -7.137  19.027  0.00  0.00            
ATOM   1772  HW1 HOH X 575      23.137  -6.454  18.491  0.00  0.00            
ATOM   1773  HW2 HOH X 575      23.890  -6.672  19.787  0.00  0.00            
ATOM   1774  OW  HOH X 576       1.143   8.822  21.470  0.00  0.00            
ATOM   1775  HW1 HOH X 576       0.786   8.334  20.728  0.00  0.00            
ATOM   1776  HW2 HOH X 576       2.089   8.824  21.324  0.00  0.00            
ATOM   1777  OW  HOH X 577      36.060  15.886  16.640  0.00  0.00            
ATOM   1778  HW1 HOH X 577      35.187  15.513  16.519  0.00  0.00            
ATOM   1779  HW2 HOH X 577      36.571  15.179  17.034  0.00  0.00            
ATOM   1780  OW  HOH X 578       7.543  -5.596  13.277  0.00  0.00            
ATOM   1781  HW1 HOH X 578       7.720  -5.617  14.218  0.00  0.00            
ATOM   1782  HW2 HOH X 578       7.106  -6.428  13.097  0.00  0.00            
ATOM   1783  OW  HOH X 579      14.331  -6.129  22.880  0.00  0.00            
ATOM   1784  HW1 HOH X 579      13.970  -6.693  22.196  0.00  0.00            
ATOM   1785  HW2 HOH X 579      13.958  -5.266  22.702  0.00  0.00            
ATOM   1786  OW  HOH X 580       3.087   2.495  22.802  0.00  0.00            
ATOM   1787  HW1 HOH X 580       3.075   3.216  22.171  0.00  0.00            
ATOM   1788  HW2 HOH X 580       4.007   2.237  22.854  0.00  0.00            
ATOM   1789  OW  HOH X 581       1.232   0.825  30.634  0.00  0.00            
ATOM   1790  HW1 HOH X 581       1.626   1.542  31.131  0.00  0.00            
ATOM   1791  HW2 HOH X 581       1.595   0.032  31.027  0.00  0.00            
ATOM   1792  OW  HOH X 582      10.540  -6.109   8.575  0.00  0.00            
ATOM   1793  HW1 HOH X 582      10.703  -7.023   8.341  0.00  0.00            
ATOM   1794  HW2 HOH X 582      11.402  -5.695   8.539  0.00  0.00            
ATOM   1795  OW  HOH X 583      16.725  10.902  26.032  0.00  0.00            
ATOM   1796  HW1 HOH X 583      17.140  10.197  26.529  0.00  0.00            
ATOM   1797  HW2 HOH X 583      17.152  10.874  25.175  0.00  0.00            
ATOM   1798  OW  HOH X 584       9.458  18.342  24.518  0.00  0.00            
ATOM   1799  HW1 HOH X 584      10.079  18.619  25.191  0.00  0.00            
ATOM   1800  HW2 HOH X 584       8.626  18.735  24.782  0.00  0.00            
ATOM   1801  OW  HOH X 585      26.929  18.668  31.982  0.00  0.00            
ATOM   1802  HW1 HOH X 585      27.140  19.132  31.171  0.00  0.00            
ATOM   1803  HW2 HOH X 585      25.981  18.764  32.074  0.00  0.00            
ATOM   1804  OW  HOH X 586      29.844   7.007  32.040  0.00  0.00            
ATOM   1805  HW1 HOH X 586      30.494   7.217  32.710  0.00  0.00            
ATOM   1806  HW2 HOH X 586      29.210   7.723  32.088  0.00  0.00            
ATOM   1807  OW  HOH X 587      24.645  30.652  17.129  0.00  0.00            
ATOM   1808  HW1 HOH X 587      25.050  31.504  16.967  0.00  0.00            
ATOM   1809  HW2 HOH X 587      25.354  30.110  17.473  0.00  0.00            
ATOM   1810  OW  HOH X 588      14.452  22.427  25.970  0.00  0.00            
ATOM   1811  HW1 HOH X 588      14.731  22.414  25.055  0.00  0.00            
ATOM   1812  HW2 HOH X 588      13.496  22.406  25.930  0.00  0.00            
ATOM   1813  OW  HOH X 589      32.109  16.952  32.167  0.00  0.00            
ATOM   1814  HW1 HOH X 589      32.043  16.306  32.871  0.00  0.00            
ATOM   1815  HW2 HOH X 589      32.742  16.577  31.556  0.00  0.00            
ATOM   1816  OW  HOH X 590      29.506  15.776  31.465  0.00  0.00            
ATOM   1817  HW1 HOH X 590      28.687  15.691  31.953  0.00  0.00            
ATOM   1818  HW2 HOH X 590      30.045  16.360  31.998  0.00  0.00            
ATOM   1819  OW  HOH X 591      23.267  10.225  29.266  0.00  0.00            
ATOM   1820  HW1 HOH X 591      23.483   9.483  28.701  0.00  0.00            
ATOM   1821  HW2 HOH X 591      23.001   9.826  30.094  0.00  0.00            
ATOM   1822  OW  HOH X 592      31.468   7.313  34.493  0.00  0.00            
ATOM   1823  HW1 HOH X 592      31.991   8.108  34.388  0.00  0.00            
ATOM   1824  HW2 HOH X 592      32.062   6.601  34.253  0.00  0.00            
ATOM   1825  OW  HOH X 593      -4.292  17.950  14.958  0.00  0.00            
ATOM   1826  HW1 HOH X 593      -5.141  18.318  15.204  0.00  0.00            
ATOM   1827  HW2 HOH X 593      -3.932  18.577  14.331  0.00  0.00            
ATOM   1828  OW  HOH X 594      10.358  -8.767   8.114  0.00  0.00            
ATOM   1829  HW1 HOH X 594      11.123  -9.269   7.832  0.00  0.00            
ATOM   1830  HW2 HOH X 594       9.654  -9.413   8.168  0.00  0.00            
ATOM   1831  OW  HOH X 595      18.787  17.729  27.051  0.00  0.00            
ATOM   1832  HW1 HOH X 595      18.108  17.839  26.385  0.00  0.00            
ATOM   1833  HW2 HOH X 595      18.452  18.200  27.814  0.00  0.00            
ATOM   1834  OW  HOH X 596      16.048  -4.656  10.809  0.00  0.00            
ATOM   1835  HW1 HOH X 596      16.806  -4.073  10.857  0.00  0.00            
ATOM   1836  HW2 HOH X 596      15.912  -4.794   9.871  0.00  0.00            
ATOM   1837  OW  HOH X 597      15.194   6.900  13.014  0.00  0.00            
ATOM   1838  HW1 HOH X 597      14.607   6.144  13.034  0.00  0.00            
ATOM   1839  HW2 HOH X 597      14.912   7.402  12.249  0.00  0.00            
ATOM   1840  OW  HOH X 598      -4.964   4.206  26.602  0.00  0.00            
ATOM   1841  HW1 HOH X 598      -4.397   3.585  26.144  0.00  0.00            
ATOM   1842  HW2 HOH X 598      -4.798   5.045  26.173  0.00  0.00            
ATOM   1843  OW  HOH X 599      -0.819  20.760  17.944  0.00  0.00            
ATOM   1844  HW1 HOH X 599      -0.452  20.095  17.362  0.00  0.00            
ATOM   1845  HW2 HOH X 599      -0.503  20.517  18.815  0.00  0.00            
ATOM   1846  OW  HOH X 600      28.027  12.844  21.130  0.00  0.00            
ATOM   1847  HW1 HOH X 600      28.398  12.010  21.418  0.00  0.00            
ATOM   1848  HW2 HOH X 600      27.947  13.361  21.931  0.00  0.00            
ATOM   1849  OW  HOH X 601      16.656  19.312  25.165  0.00  0.00            
ATOM   1850  HW1 HOH X 601      17.159  18.537  24.913  0.00  0.00            
ATOM   1851  HW2 HOH X 601      16.797  19.932  24.449  0.00  0.00            
ATOM   1852  OW  HOH X 602      13.234  14.759  13.957  0.00  0.00            
ATOM   1853  HW1 HOH X 602      13.342  15.673  14.219  0.00  0.00            
ATOM   1854  HW2 HOH X 602      12.914  14.803  13.056  0.00  0.00            
ATOM   1855  OW  HOH X 603      11.028  -8.579  19.596  0.00  0.00            
ATOM   1856  HW1 HOH X 603      11.018  -9.394  20.097  0.00  0.00            
ATOM   1857  HW2 HOH X 603      11.056  -8.859  18.681  0.00  0.00            
ATOM   1858  OW  HOH X 604      18.238   5.733  13.122  0.00  0.00            
ATOM   1859  HW1 HOH X 604      18.573   6.461  13.645  0.00  0.00            
ATOM   1860  HW2 HOH X 604      17.543   6.121  12.589  0.00  0.00            
ATOM   1861  OW  HOH X 605       5.836   5.555   3.531  0.00  0.00            
ATOM   1862  HW1 HOH X 605       6.739   5.239   3.542  0.00  0.00            
ATOM   1863  HW2 HOH X 605       5.667   5.832   4.431  0.00  0.00            
ATOM   1864  OW  HOH X 606      20.339  12.315  38.105  0.00  0.00            
ATOM   1865  HW1 HOH X 606      19.882  11.700  38.678  0.00  0.00            
ATOM   1866  HW2 HOH X 606      20.922  11.766  37.580  0.00  0.00            
ATOM   1867  OW  HOH X 607       2.442  -4.365  25.942  0.00  0.00            
ATOM   1868  HW1 HOH X 607       3.243  -4.840  25.717  0.00  0.00            
ATOM   1869  HW2 HOH X 607       2.553  -4.132  26.864  0.00  0.00            
ATOM   1870  OW  HOH X 608      13.855  -6.304  15.482  0.00  0.00            
ATOM   1871  HW1 HOH X 608      12.935  -6.340  15.220  0.00  0.00            
ATOM   1872  HW2 HOH X 608      14.299  -5.883  14.746  0.00  0.00            
ATOM   1873  OW  HOH X 609      17.356  -8.125  19.048  0.00  0.00            
ATOM   1874  HW1 HOH X 609      18.283  -7.944  18.894  0.00  0.00            
ATOM   1875  HW2 HOH X 609      17.046  -8.503  18.225  0.00  0.00            
ATOM   1876  OW  HOH X 610      12.246  -6.340  12.748  0.00  0.00            
ATOM   1877  HW1 HOH X 610      13.154  -6.058  12.860  0.00  0.00            
ATOM   1878  HW2 HOH X 610      11.739  -5.529  12.764  0.00  0.00            
ATOM   1879  OW  HOH X 611      22.509  21.492  17.649  0.00  0.00            
ATOM   1880  HW1 HOH X 611      22.612  20.591  17.956  0.00  0.00            
ATOM   1881  HW2 HOH X 611      23.174  21.592  16.968  0.00  0.00            
ATOM   1882  OW  HOH X 612       6.625  -5.123  17.064  0.00  0.00            
ATOM   1883  HW1 HOH X 612       6.300  -5.124  17.964  0.00  0.00            
ATOM   1884  HW2 HOH X 612       5.843  -4.995  16.527  0.00  0.00            
ATOM   1885  OW  HOH X 613       7.001   7.490   1.803  0.00  0.00            
ATOM   1886  HW1 HOH X 613       7.228   8.068   2.532  0.00  0.00            
ATOM   1887  HW2 HOH X 613       6.259   6.979   2.125  0.00  0.00            
ATOM   1888  OW  HOH X 614      23.025   3.132  23.926  0.00  0.00            
ATOM   1889  HW1 HOH X 614      22.073   3.213  23.993  0.00  0.00            
ATOM   1890  HW2 HOH X 614      23.272   2.583  24.670  0.00  0.00            
ATOM   1891  OW  HOH X 615      25.312  16.320  42.210  0.00  0.00            
ATOM   1892  HW1 HOH X 615      24.823  15.671  41.705  0.00  0.00            
ATOM   1893  HW2 HOH X 615      24.874  17.150  42.022  0.00  0.00            
ATOM   1894  OW  HOH X 616      26.479  17.918   6.305  0.00  0.00            
ATOM   1895  HW1 HOH X 616      27.006  17.880   7.103  0.00  0.00            
ATOM   1896  HW2 HOH X 616      26.357  18.854   6.142  0.00  0.00            
ATOM   1897  OW  HOH X 617       8.440   4.427   4.211  0.00  0.00            
ATOM   1898  HW1 HOH X 617       9.101   4.514   3.525  0.00  0.00            
ATOM   1899  HW2 HOH X 617       8.923   4.101   4.970  0.00  0.00            
ATOM   1900  OW  HOH X 618      35.733  11.521  18.874  0.00  0.00            
ATOM   1901  HW1 HOH X 618      35.593  11.478  17.928  0.00  0.00            
ATOM   1902  HW2 HOH X 618      34.977  12.004  19.208  0.00  0.00            
ATOM   1903  OW  HOH X 619       2.976   1.475  32.925  0.00  0.00            
ATOM   1904  HW1 HOH X 619       3.635   2.164  32.838  0.00  0.00            
ATOM   1905  HW2 HOH X 619       2.485   1.712  33.712  0.00  0.00            
ATOM   1906  OW  HOH X 620      -2.828   1.307  29.471  0.00  0.00            
ATOM   1907  HW1 HOH X 620      -3.616   1.400  28.935  0.00  0.00            
ATOM   1908  HW2 HOH X 620      -2.231   0.788  28.932  0.00  0.00            
ATOM   1909  OW  HOH X 621      16.774   7.092  31.996  0.00  0.00            
ATOM   1910  HW1 HOH X 621      16.525   6.251  32.377  0.00  0.00            
ATOM   1911  HW2 HOH X 621      16.533   7.738  32.660  0.00  0.00            
ATOM   1912  OW  HOH X 622      15.822  13.511  26.459  0.00  0.00            
ATOM   1913  HW1 HOH X 622      15.483  13.508  27.355  0.00  0.00            
ATOM   1914  HW2 HOH X 622      16.027  12.594  26.277  0.00  0.00            
ATOM   1915  OW  HOH X 623      24.102   9.803  38.340  0.00  0.00            
ATOM   1916  HW1 HOH X 623      25.035   9.597  38.395  0.00  0.00            
ATOM   1917  HW2 HOH X 623      24.053  10.532  37.722  0.00  0.00            
ATOM   1918  OW  HOH X 624      -7.649  13.955  13.720  0.00  0.00            
ATOM   1919  HW1 HOH X 624      -7.280  14.741  13.316  0.00  0.00            
ATOM   1920  HW2 HOH X 624      -7.074  13.246  13.432  0.00  0.00            
ATOM   1921  OW  HOH X 625      37.251  13.925  18.250  0.00  0.00            
ATOM   1922  HW1 HOH X 625      37.295  12.970  18.220  0.00  0.00            
ATOM   1923  HW2 HOH X 625      38.155  14.203  18.394  0.00  0.00            
ATOM   1924  OW  HOH X 626      23.672   3.902  21.277  0.00  0.00            
ATOM   1925  HW1 HOH X 626      23.582   3.617  22.186  0.00  0.00            
ATOM   1926  HW2 HOH X 626      22.851   3.641  20.861  0.00  0.00            
ATOM   1927  OW  HOH X 627      34.566  25.063  13.027  0.00  0.00            
ATOM   1928  HW1 HOH X 627      33.997  24.384  12.665  0.00  0.00            
ATOM   1929  HW2 HOH X 627      35.405  24.624  13.169  0.00  0.00            
ATOM   1930  OW  HOH X 628       0.716  11.222  30.141  0.00  0.00            
ATOM   1931  HW1 HOH X 628       0.707  11.942  29.511  0.00  0.00            
ATOM   1932  HW2 HOH X 628       1.118  11.595  30.926  0.00  0.00            
ATOM   1933  OW  HOH X 629      35.216  10.314  21.738  0.00  0.00            
ATOM   1934  HW1 HOH X 629      34.782   9.808  21.051  0.00  0.00            
ATOM   1935  HW2 HOH X 629      36.149  10.241  21.537  0.00  0.00            
ATOM   1936  OW  HOH X 630      13.794  30.381  23.010  0.00  0.00            
ATOM   1937  HW1 HOH X 630      13.662  30.943  23.773  0.00  0.00            
ATOM   1938  HW2 HOH X 630      14.233  29.604  23.357  0.00  0.00            
ATOM   1939  OW  HOH X 631      23.817  27.521  18.859  0.00  0.00            
ATOM   1940  HW1 HOH X 631      23.399  28.199  19.389  0.00  0.00            
ATOM   1941  HW2 HOH X 631      23.313  26.728  19.041  0.00  0.00            
ATOM   1942  OW  HOH X 632      11.508   6.849   4.259  0.00  0.00            
ATOM   1943  HW1 HOH X 632      12.269   7.066   4.798  0.00  0.00            
ATOM   1944  HW2 HOH X 632      11.465   5.893   4.279  0.00  0.00            
ATOM   1945  OW  HOH X 633      15.055  16.576  18.960  0.00  0.00            
ATOM   1946  HW1 HOH X 633      14.333  16.075  19.341  0.00  0.00            
ATOM   1947  HW2 HOH X 633      15.475  15.968  18.352  0.00  0.00            
ATOM   1948  OW  HOH X 634      21.143  28.265  23.216  0.00  0.00            
ATOM   1949  HW1 HOH X 634      20.282  27.852  23.146  0.00  0.00            
ATOM   1950  HW2 HOH X 634      21.119  28.727  24.054  0.00  0.00            
ATOM   1951  OW  HOH X 635      16.702   4.361  32.655  0.00  0.00            
ATOM   1952  HW1 HOH X 635      15.885   3.883  32.508  0.00  0.00            
ATOM   1953  HW2 HOH X 635      17.278   4.074  31.946  0.00  0.00            
ATOM   1954  OW  HOH X 636       4.010   5.832   1.599  0.00  0.00            
ATOM   1955  HW1 HOH X 636       4.729   5.582   2.178  0.00  0.00            
ATOM   1956  HW2 HOH X 636       3.771   5.022   1.149  0.00  0.00            
ATOM   1957  OW  HOH X 637      -3.652   9.844  10.086  0.00  0.00            
ATOM   1958  HW1 HOH X 637      -3.262   9.077  10.505  0.00  0.00            
ATOM   1959  HW2 HOH X 637      -4.429  10.036  10.612  0.00  0.00            
ATOM   1960  OW  HOH X 638      12.325   0.057   8.337  0.00  0.00            
ATOM   1961  HW1 HOH X 638      12.514  -0.570   9.035  0.00  0.00            
ATOM   1962  HW2 HOH X 638      11.665  -0.378   7.796  0.00  0.00            
ATOM   1963  OW  HOH X 639      22.096  28.154  20.826  0.00  0.00            
ATOM   1964  HW1 HOH X 639      22.219  29.085  20.640  0.00  0.00            
ATOM   1965  HW2 HOH X 639      21.634  28.136  21.664  0.00  0.00            
ATOM   1966  OW  HOH X 640      -0.151   5.775   9.943  0.00  0.00            
ATOM   1967  HW1 HOH X 640      -0.217   4.858  10.207  0.00  0.00            
ATOM   1968  HW2 HOH X 640      -0.825   5.880   9.271  0.00  0.00            
ATOM   1969  OW  HOH X 641      29.420  16.551  41.295  0.00  0.00            
ATOM   1970  HW1 HOH X 641      30.153  16.911  41.793  0.00  0.00            
ATOM   1971  HW2 HOH X 641      29.239  15.707  41.708  0.00  0.00            
ATOM   1972  OW  HOH X 642      20.381  31.623  22.619  0.00  0.00            
ATOM   1973  HW1 HOH X 642      19.943  31.149  21.913  0.00  0.00            
ATOM   1974  HW2 HOH X 642      19.708  32.205  22.972  0.00  0.00            
ATOM   1975  OW  HOH X 643      31.335  19.107  24.815  0.00  0.00            
ATOM   1976  HW1 HOH X 643      31.965  18.467  24.485  0.00  0.00            
ATOM   1977  HW2 HOH X 643      31.849  19.676  25.389  0.00  0.00            
ATOM   1978  OW  HOH X 644       8.257  -0.092   9.392  0.00  0.00            
ATOM   1979  HW1 HOH X 644       7.935  -0.990   9.464  0.00  0.00            
ATOM   1980  HW2 HOH X 644       9.069  -0.168   8.890  0.00  0.00            
ATOM   1981  OW  HOH X 645       5.260  11.555  14.676  0.00  0.00            
ATOM   1982  HW1 HOH X 645       6.206  11.439  14.769  0.00  0.00            
ATOM   1983  HW2 HOH X 645       4.886  11.062  15.407  0.00  0.00            
ATOM   1984  OW  HOH X 646       9.720   8.649  20.536  0.00  0.00            
ATOM   1985  HW1 HOH X 646      10.468   9.034  20.994  0.00  0.00            
ATOM   1986  HW2 HOH X 646       8.966   9.151  20.845  0.00  0.00            
ATOM   1987  OW  HOH X 647      15.680   5.506  22.609  0.00  0.00            
ATOM   1988  HW1 HOH X 647      14.930   4.911  22.626  0.00  0.00            
ATOM   1989  HW2 HOH X 647      15.949   5.578  23.525  0.00  0.00            
ATOM   1990  OW  HOH X 648      19.967   2.657  28.480  0.00  0.00            
ATOM   1991  HW1 HOH X 648      19.555   3.496  28.688  0.00  0.00            
ATOM   1992  HW2 HOH X 648      20.864   2.886  28.235  0.00  0.00            
ATOM   1993  OW  HOH X 649      12.447  12.911  21.282  0.00  0.00            
ATOM   1994  HW1 HOH X 649      13.368  12.839  21.532  0.00  0.00            
ATOM   1995  HW2 HOH X 649      12.348  13.816  20.987  0.00  0.00            
ATOM   1996  OW  HOH X 650       9.741  12.142  10.460  0.00  0.00            
ATOM   1997  HW1 HOH X 650       9.352  11.425  10.960  0.00  0.00            
ATOM   1998  HW2 HOH X 650      10.442  11.730   9.955  0.00  0.00            
ATOM   1999  OW  HOH X 651       3.872  11.681  20.997  0.00  0.00            
ATOM   2000  HW1 HOH X 651       4.693  12.113  21.233  0.00  0.00            
ATOM   2001  HW2 HOH X 651       3.944  11.531  20.054  0.00  0.00            
ATOM   2002  OW  HOH X 652      30.611  10.369  29.925  0.00  0.00            
ATOM   2003  HW1 HOH X 652      30.052  11.093  29.645  0.00  0.00            
ATOM   2004  HW2 HOH X 652      31.501  10.716  29.866  0.00  0.00            
ATOM   2005  OW  HOH X 653      27.605   8.966  31.703  0.00  0.00            
ATOM   2006  HW1 HOH X 653      27.309   9.049  30.797  0.00  0.00            
ATOM   2007  HW2 HOH X 653      27.521   9.848  32.065  0.00  0.00            
ATOM   2008  OW  HOH X 654      16.197   9.117  33.747  0.00  0.00            
ATOM   2009  HW1 HOH X 654      16.798   8.613  34.296  0.00  0.00            
ATOM   2010  HW2 HOH X 654      16.660   9.936  33.573  0.00  0.00            
ATOM   2011  OW  HOH X 655      16.808  12.415   1.357  0.00  0.00            
ATOM   2012  HW1 HOH X 655      16.723  12.782   0.477  0.00  0.00            
ATOM   2013  HW2 HOH X 655      15.937  12.512   1.743  0.00  0.00            
ATOM   2014  OW  HOH X 656       3.192   0.066  15.664  0.00  0.00            
ATOM   2015  HW1 HOH X 656       3.407  -0.576  14.987  0.00  0.00            
ATOM   2016  HW2 HOH X 656       3.956   0.642  15.698  0.00  0.00            
ATOM   2017  OW  HOH X 657      31.831  15.590  34.282  0.00  0.00            
ATOM   2018  HW1 HOH X 657      32.058  14.662  34.222  0.00  0.00            
ATOM   2019  HW2 HOH X 657      31.986  15.816  35.200  0.00  0.00            
ATOM   2020  OW  HOH X 658      28.405  20.055  16.867  0.00  0.00            
ATOM   2021  HW1 HOH X 658      28.185  19.264  16.374  0.00  0.00            
ATOM   2022  HW2 HOH X 658      28.641  19.736  17.738  0.00  0.00            
ATOM   2023  OW  HOH X 659      12.714   9.807   1.649  0.00  0.00            
ATOM   2024  HW1 HOH X 659      11.901   9.303   1.682  0.00  0.00            
ATOM   2025  HW2 HOH X 659      13.298   9.360   2.261  0.00  0.00            
ATOM   2026  OW  HOH X 660      -5.947  15.730  12.667  0.00  0.00            
ATOM   2027  HW1 HOH X 660      -5.286  15.675  13.357  0.00  0.00            
ATOM   2028  HW2 HOH X 660      -5.733  16.534  12.193  0.00  0.00            
ATOM   2029  OW  HOH X 661      24.603  14.052  16.450  0.00  0.00            
ATOM   2030  HW1 HOH X 661      24.884  13.218  16.074  0.00  0.00            
ATOM   2031  HW2 HOH X 661      24.244  14.540  15.709  0.00  0.00            
ATOM   2032  OW  HOH X 662      32.983  21.604  23.777  0.00  0.00            
ATOM   2033  HW1 HOH X 662      33.057  20.950  23.083  0.00  0.00            
ATOM   2034  HW2 HOH X 662      33.881  21.903  23.923  0.00  0.00            
ATOM   2035  OW  HOH X 663      11.247  17.157  12.923  0.00  0.00            
ATOM   2036  HW1 HOH X 663      12.082  17.588  13.105  0.00  0.00            
ATOM   2037  HW2 HOH X 663      10.907  17.610  12.151  0.00  0.00            
ATOM   2038  OW  HOH X 664       8.495  12.245   8.003  0.00  0.00            
ATOM   2039  HW1 HOH X 664       8.915  12.692   7.268  0.00  0.00            
ATOM   2040  HW2 HOH X 664       9.132  12.302   8.715  0.00  0.00            
ATOM   2041  OW  HOH X 665       4.744   9.392  16.386  0.00  0.00            
ATOM   2042  HW1 HOH X 665       3.883   8.977  16.432  0.00  0.00            
ATOM   2043  HW2 HOH X 665       5.363   8.662  16.401  0.00  0.00            
ATOM   2044  OW  HOH X 666       0.377  17.440  18.728  0.00  0.00            
ATOM   2045  HW1 HOH X 666      -0.573  17.388  18.620  0.00  0.00            
ATOM   2046  HW2 HOH X 666       0.508  17.504  19.674  0.00  0.00            
ATOM   2047  OW  HOH X 667      31.276   3.988  28.550  0.00  0.00            
ATOM   2048  HW1 HOH X 667      30.395   3.803  28.878  0.00  0.00            
ATOM   2049  HW2 HOH X 667      31.708   4.446  29.270  0.00  0.00            
ATOM   2050  OW  HOH X 668      12.291  12.155   4.051  0.00  0.00            
ATOM   2051  HW1 HOH X 668      11.550  11.551   4.000  0.00  0.00            
ATOM   2052  HW2 HOH X 668      12.006  12.925   3.558  0.00  0.00            
ATOM   2053  OW  HOH X 669      11.761  24.365  19.580  0.00  0.00            
ATOM   2054  HW1 HOH X 669      11.216  23.729  20.044  0.00  0.00            
ATOM   2055  HW2 HOH X 669      12.368  23.831  19.067  0.00  0.00            
ATOM   2056  OW  HOH X 670       3.277  19.535  15.319  0.00  0.00            
ATOM   2057  HW1 HOH X 670       3.768  20.031  15.973  0.00  0.00            
ATOM   2058  HW2 HOH X 670       3.060  20.177  14.643  0.00  0.00            
ATOM   2059  OW  HOH X 671      20.768  -0.622  11.669  0.00  0.00            
ATOM   2060  HW1 HOH X 671      21.007  -0.705  10.746  0.00  0.00            
ATOM   2061  HW2 HOH X 671      20.441   0.274  11.752  0.00  0.00            
ATOM   2062  OW  HOH X 672       3.429  11.386  23.632  0.00  0.00            
ATOM   2063  HW1 HOH X 672       4.298  10.985  23.641  0.00  0.00            
ATOM   2064  HW2 HOH X 672       3.264  11.581  22.710  0.00  0.00            
ATOM   2065  OW  HOH X 673      25.874  -0.942  18.569  0.00  0.00            
ATOM   2066  HW1 HOH X 673      25.636  -1.861  18.689  0.00  0.00            
ATOM   2067  HW2 HOH X 673      26.791  -0.964  18.298  0.00  0.00            
ATOM   2068  OW  HOH X 674      22.243  11.484  36.068  0.00  0.00            
ATOM   2069  HW1 HOH X 674      21.576  11.822  35.471  0.00  0.00            
ATOM   2070  HW2 HOH X 674      23.067  11.834  35.729  0.00  0.00            
ATOM   2071  OW  HOH X 675       6.502   0.102  13.834  0.00  0.00            
ATOM   2072  HW1 HOH X 675       6.575  -0.725  14.310  0.00  0.00            
ATOM   2073  HW2 HOH X 675       7.164   0.667  14.232  0.00  0.00            
ATOM   2074  OW  HOH X 676       7.159   5.083   0.136  0.00  0.00            
ATOM   2075  HW1 HOH X 676       7.451   5.958   0.392  0.00  0.00            
ATOM   2076  HW2 HOH X 676       6.570   5.233  -0.603  0.00  0.00            
ATOM   2077  OW  HOH X 677      -2.703   2.949  25.655  0.00  0.00            
ATOM   2078  HW1 HOH X 677      -2.510   3.439  24.856  0.00  0.00            
ATOM   2079  HW2 HOH X 677      -2.002   2.299  25.713  0.00  0.00            
ATOM   2080  OW  HOH X 678       8.569  21.278  15.938  0.00  0.00            
ATOM   2081  HW1 HOH X 678       8.817  21.433  16.849  0.00  0.00            
ATOM   2082  HW2 HOH X 678       7.613  21.236  15.954  0.00  0.00            
ATOM   2083  OW  HOH X 679       5.725   7.885  20.124  0.00  0.00            
ATOM   2084  HW1 HOH X 679       4.827   8.161  20.309  0.00  0.00            
ATOM   2085  HW2 HOH X 679       5.737   6.951  20.331  0.00  0.00            
ATOM   2086  OW  HOH X 680      22.766  14.864  18.715  0.00  0.00            
ATOM   2087  HW1 HOH X 680      23.056  14.116  18.193  0.00  0.00            
ATOM   2088  HW2 HOH X 680      22.233  14.479  19.411  0.00  0.00            
ATOM   2089  OW  HOH X 681      24.260  21.139  29.366  0.00  0.00            
ATOM   2090  HW1 HOH X 681      23.541  20.552  29.131  0.00  0.00            
ATOM   2091  HW2 HOH X 681      24.884  21.052  28.645  0.00  0.00            
ATOM   2092  OW  HOH X 682      12.100  26.735  27.888  0.00  0.00            
ATOM   2093  HW1 HOH X 682      11.676  26.296  27.150  0.00  0.00            
ATOM   2094  HW2 HOH X 682      13.025  26.507  27.803  0.00  0.00            
ATOM   2095  OW  HOH X 683      16.705   3.317  12.710  0.00  0.00            
ATOM   2096  HW1 HOH X 683      17.106   4.181  12.804  0.00  0.00            
ATOM   2097  HW2 HOH X 683      16.436   3.276  11.792  0.00  0.00            
ATOM   2098  OW  HOH X 684      15.627  17.857   7.670  0.00  0.00            
ATOM   2099  HW1 HOH X 684      16.151  17.202   7.209  0.00  0.00            
ATOM   2100  HW2 HOH X 684      16.152  18.087   8.438  0.00  0.00            
ATOM   2101  OW  HOH X 685      18.470   6.842   4.614  0.00  0.00            
ATOM   2102  HW1 HOH X 685      18.800   7.520   4.023  0.00  0.00            
ATOM   2103  HW2 HOH X 685      19.213   6.253   4.742  0.00  0.00            
ATOM   2104  OW  HOH X 686      28.131  15.640  27.288  0.00  0.00            
ATOM   2105  HW1 HOH X 686      29.085  15.680  27.234  0.00  0.00            
ATOM   2106  HW2 HOH X 686      27.834  15.742  26.384  0.00  0.00            
ATOM   2107  OW  HOH X 687      28.619  20.413  37.593  0.00  0.00            
ATOM   2108  HW1 HOH X 687      28.215  19.848  38.252  0.00  0.00            
ATOM   2109  HW2 HOH X 687      29.285  20.904  38.074  0.00  0.00            
ATOM   2110  OW  HOH X 688      21.744   3.609  17.710  0.00  0.00            
ATOM   2111  HW1 HOH X 688      22.657   3.704  17.983  0.00  0.00            
ATOM   2112  HW2 HOH X 688      21.385   2.947  18.302  0.00  0.00            
ATOM   2113  OW  HOH X 689      14.961   0.069  15.512  0.00  0.00            
ATOM   2114  HW1 HOH X 689      14.194   0.102  16.082  0.00  0.00            
ATOM   2115  HW2 HOH X 689      14.603  -0.070  14.635  0.00  0.00            
ATOM   2116  OW  HOH X 690       6.053   8.739  29.852  0.00  0.00            
ATOM   2117  HW1 HOH X 690       6.078   7.984  29.263  0.00  0.00            
ATOM   2118  HW2 HOH X 690       6.288   9.483  29.297  0.00  0.00            
ATOM   2119  OW  HOH X 691      13.935   7.400   6.112  0.00  0.00            
ATOM   2120  HW1 HOH X 691      14.629   7.640   5.499  0.00  0.00            
ATOM   2121  HW2 HOH X 691      14.098   6.478   6.311  0.00  0.00            
ATOM   2122  OW  HOH X 692      17.870  32.217  25.738  0.00  0.00            
ATOM   2123  HW1 HOH X 692      18.381  31.418  25.610  0.00  0.00            
ATOM   2124  HW2 HOH X 692      18.412  32.911  25.363  0.00  0.00            
ATOM   2125  OW  HOH X 693      18.773  10.433  32.941  0.00  0.00            
ATOM   2126  HW1 HOH X 693      19.280  11.157  32.573  0.00  0.00            
ATOM   2127  HW2 HOH X 693      19.429   9.855  33.332  0.00  0.00            
ATOM   2128  OW  HOH X 694      27.703  14.471  40.817  0.00  0.00            
ATOM   2129  HW1 HOH X 694      27.339  15.356  40.807  0.00  0.00            
ATOM   2130  HW2 HOH X 694      26.976  13.909  40.547  0.00  0.00            
ATOM   2131  OW  HOH X 695      15.127  12.212  33.236  0.00  0.00            
ATOM   2132  HW1 HOH X 695      15.716  12.795  32.756  0.00  0.00            
ATOM   2133  HW2 HOH X 695      15.606  11.989  34.033  0.00  0.00            
ATOM   2134  OW  HOH X 696      12.991  22.572  30.622  0.00  0.00            
ATOM   2135  HW1 HOH X 696      12.140  22.136  30.579  0.00  0.00            
ATOM   2136  HW2 HOH X 696      13.487  22.203  29.891  0.00  0.00            
ATOM   2137  OW  HOH X 697      19.338   1.526  12.689  0.00  0.00            
ATOM   2138  HW1 HOH X 697      18.784   2.282  12.882  0.00  0.00            
ATOM   2139  HW2 HOH X 697      18.726   0.793  12.613  0.00  0.00            
ATOM   2140  OW  HOH X 698      18.003   4.186  17.007  0.00  0.00            
ATOM   2141  HW1 HOH X 698      17.597   3.471  17.498  0.00  0.00            
ATOM   2142  HW2 HOH X 698      17.289   4.557  16.489  0.00  0.00            
ATOM   2143  OW  HOH X 699      22.384  18.456  35.845  0.00  0.00            
ATOM   2144  HW1 HOH X 699      22.461  19.368  35.567  0.00  0.00            
ATOM   2145  HW2 HOH X 699      22.244  18.504  36.791  0.00  0.00            
ATOM   2146  OW  HOH X 700      13.075  -6.983  10.000  0.00  0.00            
ATOM   2147  HW1 HOH X 700      13.398  -7.874  10.133  0.00  0.00            
ATOM   2148  HW2 HOH X 700      12.387  -6.876  10.657  0.00  0.00            
ATOM   2149  OW  HOH X 701      23.863  23.403  37.896  0.00  0.00            
ATOM   2150  HW1 HOH X 701      24.146  24.181  37.416  0.00  0.00            
ATOM   2151  HW2 HOH X 701      24.543  22.753  37.721  0.00  0.00            
ATOM   2152  OW  HOH X 702       9.257  16.895  10.472  0.00  0.00            
ATOM   2153  HW1 HOH X 702       9.615  17.452   9.780  0.00  0.00            
ATOM   2154  HW2 HOH X 702       9.268  16.013  10.100  0.00  0.00            
ATOM   2155  OW  HOH X 703       7.220  -9.331  24.905  0.00  0.00            
ATOM   2156  HW1 HOH X 703       6.523  -9.017  25.482  0.00  0.00            
ATOM   2157  HW2 HOH X 703       7.509 -10.152  25.302  0.00  0.00            
ATOM   2158  OW  HOH X 704       2.390   8.802   4.883  0.00  0.00            
ATOM   2159  HW1 HOH X 704       2.247   8.805   5.829  0.00  0.00            
ATOM   2160  HW2 HOH X 704       3.272   9.155   4.772  0.00  0.00            
ATOM   2161  OW  HOH X 705      22.556   8.505  35.655  0.00  0.00            
ATOM   2162  HW1 HOH X 705      22.790   9.105  36.363  0.00  0.00            
ATOM   2163  HW2 HOH X 705      23.317   7.931  35.565  0.00  0.00            
ATOM   2164  OW  HOH X 706      20.941  16.312  31.776  0.00  0.00            
ATOM   2165  HW1 HOH X 706      20.828  17.028  31.151  0.00  0.00            
ATOM   2166  HW2 HOH X 706      20.494  16.612  32.568  0.00  0.00            
ATOM   2167  OW  HOH X 707      11.503   2.974  26.028  0.00  0.00            
ATOM   2168  HW1 HOH X 707      10.856   3.512  25.573  0.00  0.00            
ATOM   2169  HW2 HOH X 707      12.257   3.552  26.144  0.00  0.00            
ATOM   2170  OW  HOH X 708       9.121   7.628   5.344  0.00  0.00            
ATOM   2171  HW1 HOH X 708       9.757   7.294   4.712  0.00  0.00            
ATOM   2172  HW2 HOH X 708       9.647   8.112   5.980  0.00  0.00            
ATOM   2173  OW  HOH X 709       6.352  17.155  15.553  0.00  0.00            
ATOM   2174  HW1 HOH X 709       6.530  17.844  16.193  0.00  0.00            
ATOM   2175  HW2 HOH X 709       6.598  17.539  14.712  0.00  0.00            
ATOM   2176  OW  HOH X 710      -0.793  10.341  23.038  0.00  0.00            
ATOM   2177  HW1 HOH X 710      -0.031  10.050  22.536  0.00  0.00            
ATOM   2178  HW2 HOH X 710      -1.370  10.742  22.388  0.00  0.00            
ATOM   2179  OW  HOH X 711      35.446  22.335  11.054  0.00  0.00            
ATOM   2180  HW1 HOH X 711      35.415  22.499  11.997  0.00  0.00            
ATOM   2181  HW2 HOH X 711      34.603  21.930  10.853  0.00  0.00            
ATOM   2182  OW  HOH X 712      13.740  23.214  16.250  0.00  0.00            
ATOM   2183  HW1 HOH X 712      14.242  22.464  15.930  0.00  0.00            
ATOM   2184  HW2 HOH X 712      13.833  23.176  17.202  0.00  0.00            
ATOM   2185  OW  HOH X 713      16.370  18.825  13.953  0.00  0.00            
ATOM   2186  HW1 HOH X 713      17.105  18.266  14.204  0.00  0.00            
ATOM   2187  HW2 HOH X 713      16.631  19.203  13.113  0.00  0.00            
ATOM   2188  OW  HOH X 714      -2.796   5.990  17.128  0.00  0.00            
ATOM   2189  HW1 HOH X 714      -2.461   5.542  16.351  0.00  0.00            
ATOM   2190  HW2 HOH X 714      -2.766   5.327  17.818  0.00  0.00            
ATOM   2191  OW  HOH X 715      18.470  -5.879  15.311  0.00  0.00            
ATOM   2192  HW1 HOH X 715      17.918  -6.647  15.164  0.00  0.00            
ATOM   2193  HW2 HOH X 715      18.116  -5.213  14.722  0.00  0.00            
ATOM   2194  OW  HOH X 716      24.085   5.713  33.116  0.00  0.00            
ATOM   2195  HW1 HOH X 716      23.171   5.959  32.972  0.00  0.00            
ATOM   2196  HW2 HOH X 716      24.174   5.667  34.067  0.00  0.00            
ATOM   2197  OW  HOH X 717      29.704   2.041  23.718  0.00  0.00            
ATOM   2198  HW1 HOH X 717      29.003   2.044  23.066  0.00  0.00            
ATOM   2199  HW2 HOH X 717      30.337   2.681  23.392  0.00  0.00            
ATOM   2200  OW  HOH X 718      38.515  12.839  22.314  0.00  0.00            
ATOM   2201  HW1 HOH X 718      38.334  12.059  21.790  0.00  0.00            
ATOM   2202  HW2 HOH X 718      38.630  13.539  21.670  0.00  0.00            
ATOM   2203  OW  HOH X 719       4.620   6.970  12.268  0.00  0.00            
ATOM   2204  HW1 HOH X 719       4.023   7.469  11.710  0.00  0.00            
ATOM   2205  HW2 HOH X 719       5.255   6.590  11.661  0.00  0.00            
ATOM   2206  OW  HOH X 720       8.475  -3.972  19.984  0.00  0.00            
ATOM   2207  HW1 HOH X 720       9.237  -3.827  20.546  0.00  0.00            
ATOM   2208  HW2 HOH X 720       7.805  -3.384  20.332  0.00  0.00            
ATOM   2209  OW  HOH X 721      36.085   8.762  28.444  0.00  0.00            
ATOM   2210  HW1 HOH X 721      36.615   9.471  28.809  0.00  0.00            
ATOM   2211  HW2 HOH X 721      35.307   8.734  29.001  0.00  0.00            
ATOM   2212  OW  HOH X 722      23.292   9.057   9.381  0.00  0.00            
ATOM   2213  HW1 HOH X 722      22.611   8.387   9.438  0.00  0.00            
ATOM   2214  HW2 HOH X 722      24.056   8.658   9.798  0.00  0.00            
ATOM   2215  OW  HOH X 723       6.569   2.315   0.894  0.00  0.00            
ATOM   2216  HW1 HOH X 723       6.937   2.105   1.753  0.00  0.00            
ATOM   2217  HW2 HOH X 723       6.793   3.235   0.755  0.00  0.00            
ATOM   2218  OW  HOH X 724      26.119   5.288  31.242  0.00  0.00            
ATOM   2219  HW1 HOH X 724      25.398   5.544  31.817  0.00  0.00            
ATOM   2220  HW2 HOH X 724      26.635   4.673  31.764  0.00  0.00            
ATOM   2221  OW  HOH X 725       5.232  -5.311  19.807  0.00  0.00            
ATOM   2222  HW1 HOH X 725       4.657  -6.033  19.553  0.00  0.00            
ATOM   2223  HW2 HOH X 725       4.637  -4.586  19.997  0.00  0.00            
ATOM   2224  OW  HOH X 726      31.822  12.345  37.204  0.00  0.00            
ATOM   2225  HW1 HOH X 726      31.306  13.013  37.654  0.00  0.00            
ATOM   2226  HW2 HOH X 726      32.279  12.821  36.510  0.00  0.00            
ATOM   2227  OW  HOH X 727      21.246  13.907   6.530  0.00  0.00            
ATOM   2228  HW1 HOH X 727      20.403  14.345   6.645  0.00  0.00            
ATOM   2229  HW2 HOH X 727      21.118  13.336   5.772  0.00  0.00            
ATOM   2230  OW  HOH X 728       6.090  24.214  24.462  0.00  0.00            
ATOM   2231  HW1 HOH X 728       5.802  24.843  23.800  0.00  0.00            
ATOM   2232  HW2 HOH X 728       5.296  23.999  24.951  0.00  0.00            
ATOM   2233  OW  HOH X 729      10.688   5.527   7.824  0.00  0.00            
ATOM   2234  HW1 HOH X 729       9.901   5.098   7.489  0.00  0.00            
ATOM   2235  HW2 HOH X 729      11.329   5.438   7.119  0.00  0.00            
ATOM   2236  OW  HOH X 730      13.914  20.747  32.580  0.00  0.00            
ATOM   2237  HW1 HOH X 730      13.652  21.431  31.963  0.00  0.00            
ATOM   2238  HW2 HOH X 730      13.409  20.931  33.372  0.00  0.00            
ATOM   2239  OW  HOH X 731      17.114  20.158  22.586  0.00  0.00            
ATOM   2240  HW1 HOH X 731      17.489  20.645  21.852  0.00  0.00            
ATOM   2241  HW2 HOH X 731      17.599  19.333  22.599  0.00  0.00            
ATOM   2242  OW  HOH X 732      34.538  -1.626  24.576  0.00  0.00            
ATOM   2243  HW1 HOH X 732      33.920  -1.570  23.848  0.00  0.00            
ATOM   2244  HW2 HOH X 732      34.326  -0.874  25.129  0.00  0.00            
ATOM   2245  OW  HOH X 733      34.192  11.845  34.997  0.00  0.00            
ATOM   2246  HW1 HOH X 733      34.630  12.578  34.566  0.00  0.00            
ATOM   2247  HW2 HOH X 733      34.639  11.759  35.839  0.00  0.00            
ATOM   2248  OW  HOH X 734      23.818   7.209  22.734  0.00  0.00            
ATOM   2249  HW1 HOH X 734      23.565   8.075  23.053  0.00  0.00            
ATOM   2250  HW2 HOH X 734      24.706   7.081  23.067  0.00  0.00            
ATOM   2251  OW  HOH X 735      13.968  25.212  22.755  0.00  0.00            
ATOM   2252  HW1 HOH X 735      13.281  24.839  22.203  0.00  0.00            
ATOM   2253  HW2 HOH X 735      14.748  24.696  22.551  0.00  0.00            
ATOM   2254  OW  HOH X 736      34.885   5.676  22.636  0.00  0.00            
ATOM   2255  HW1 HOH X 736      35.328   5.471  23.459  0.00  0.00            
ATOM   2256  HW2 HOH X 736      34.641   6.598  22.718  0.00  0.00            
ATOM   2257  OW  HOH X 737       5.727  23.716  19.460  0.00  0.00            
ATOM   2258  HW1 HOH X 737       5.344  24.144  18.694  0.00  0.00            
ATOM   2259  HW2 HOH X 737       6.607  23.465  19.179  0.00  0.00            
ATOM   2260  OW  HOH X 738      18.034  26.596  29.026  0.00  0.00            
ATOM   2261  HW1 HOH X 738      18.216  25.901  29.658  0.00  0.00            
ATOM   2262  HW2 HOH X 738      18.886  26.798  28.639  0.00  0.00            
ATOM   2263  OW  HOH X 739      20.191  -8.212  21.432  0.00  0.00            
ATOM   2264  HW1 HOH X 739      19.423  -7.649  21.530  0.00  0.00            
ATOM   2265  HW2 HOH X 739      19.895  -9.074  21.725  0.00  0.00            
ATOM   2266  OW  HOH X 740      15.332   0.626   7.665  0.00  0.00            
ATOM   2267  HW1 HOH X 740      15.351   1.486   8.086  0.00  0.00            
ATOM   2268  HW2 HOH X 740      14.988   0.038   8.337  0.00  0.00            
ATOM   2269  OW  HOH X 741      26.364   7.474  23.516  0.00  0.00            
ATOM   2270  HW1 HOH X 741      26.538   6.902  24.264  0.00  0.00            
ATOM   2271  HW2 HOH X 741      26.713   8.326  23.779  0.00  0.00            
ATOM   2272  OW  HOH X 742       6.506   8.358   5.478  0.00  0.00            
ATOM   2273  HW1 HOH X 742       7.413   8.165   5.243  0.00  0.00            
ATOM   2274  HW2 HOH X 742       6.517   8.437   6.432  0.00  0.00            
ATOM   2275  OW  HOH X 743      22.483  -0.941  13.937  0.00  0.00            
ATOM   2276  HW1 HOH X 743      23.246  -0.364  13.970  0.00  0.00            
ATOM   2277  HW2 HOH X 743      22.216  -0.932  13.018  0.00  0.00            
ATOM   2278  OW  HOH X 744       2.987   5.730  28.573  0.00  0.00            
ATOM   2279  HW1 HOH X 744       3.489   5.894  29.372  0.00  0.00            
ATOM   2280  HW2 HOH X 744       2.650   6.590  28.321  0.00  0.00            
ATOM   2281  OW  HOH X 745      22.014  25.302  12.427  0.00  0.00            
ATOM   2282  HW1 HOH X 745      22.712  24.662  12.285  0.00  0.00            
ATOM   2283  HW2 HOH X 745      22.370  26.124  12.092  0.00  0.00            
ATOM   2284  OW  HOH X 746      28.300  18.610   8.665  0.00  0.00            
ATOM   2285  HW1 HOH X 746      28.674  19.491   8.693  0.00  0.00            
ATOM   2286  HW2 HOH X 746      29.036  18.044   8.435  0.00  0.00            
ATOM   2287  OW  HOH X 747      14.529   3.535  17.492  0.00  0.00            
ATOM   2288  HW1 HOH X 747      15.082   2.963  16.960  0.00  0.00            
ATOM   2289  HW2 HOH X 747      15.070   3.752  18.252  0.00  0.00            
ATOM   2290  OW  HOH X 748      14.712  31.255  28.524  0.00  0.00            
ATOM   2291  HW1 HOH X 748      15.212  32.066  28.432  0.00  0.00            
ATOM   2292  HW2 HOH X 748      15.372  30.562  28.507  0.00  0.00            
ATOM   2293  OW  HOH X 749       4.188  13.304  28.751  0.00  0.00            
ATOM   2294  HW1 HOH X 749       3.662  12.998  28.013  0.00  0.00            
ATOM   2295  HW2 HOH X 749       5.071  13.402  28.394  0.00  0.00            
ATOM   2296  OW  HOH X 750      20.790  15.352  44.497  0.00  0.00            
ATOM   2297  HW1 HOH X 750      20.179  15.427  45.231  0.00  0.00            
ATOM   2298  HW2 HOH X 750      20.844  16.238  44.138  0.00  0.00            
ATOM   2299  OW  HOH X 751      23.141  -2.435  21.723  0.00  0.00            
ATOM   2300  HW1 HOH X 751      23.826  -2.468  22.392  0.00  0.00            
ATOM   2301  HW2 HOH X 751      23.427  -1.749  21.121  0.00  0.00            
ATOM   2302  OW  HOH X 752      23.407  19.908  22.036  0.00  0.00            
ATOM   2303  HW1 HOH X 752      22.503  19.641  22.199  0.00  0.00            
ATOM   2304  HW2 HOH X 752      23.335  20.788  21.665  0.00  0.00            
ATOM   2305  OW  HOH X 753      10.293   4.215  23.761  0.00  0.00            
ATOM   2306  HW1 HOH X 753       9.797   4.786  23.174  0.00  0.00            
ATOM   2307  HW2 HOH X 753      10.485   3.438  23.236  0.00  0.00            
ATOM   2308  OW  HOH X 754      16.992   7.456  10.247  0.00  0.00            
ATOM   2309  HW1 HOH X 754      17.743   8.040  10.139  0.00  0.00            
ATOM   2310  HW2 HOH X 754      16.266   8.038  10.470  0.00  0.00            
ATOM   2311  OW  HOH X 755      11.116 -10.265  10.979  0.00  0.00            
ATOM   2312  HW1 HOH X 755      10.589 -10.822  10.407  0.00  0.00            
ATOM   2313  HW2 HOH X 755      10.611  -9.456  11.060  0.00  0.00            
ATOM   2314  OW  HOH X 756      21.725  12.347  32.703  0.00  0.00            
ATOM   2315  HW1 HOH X 756      22.339  11.628  32.555  0.00  0.00            
ATOM   2316  HW2 HOH X 756      21.284  12.463  31.861  0.00  0.00            
ATOM   2317  OW  HOH X 757      -6.360  19.054  16.099  0.00  0.00            
ATOM   2318  HW1 HOH X 757      -6.209  19.598  16.872  0.00  0.00            
ATOM   2319  HW2 HOH X 757      -7.261  19.251  15.840  0.00  0.00            
ATOM   2320  OW  HOH X 758      27.288  26.550  12.596  0.00  0.00            
ATOM   2321  HW1 HOH X 758      28.210  26.429  12.824  0.00  0.00            
ATOM   2322  HW2 HOH X 758      27.120  25.893  11.921  0.00  0.00            
ATOM   2323  OW  HOH X 759      29.965   6.966  15.161  0.00  0.00            
ATOM   2324  HW1 HOH X 759      30.537   7.733  15.193  0.00  0.00            
ATOM   2325  HW2 HOH X 759      29.489   6.987  15.992  0.00  0.00            
ATOM   2326  OW  HOH X 760      24.889  21.590  11.876  0.00  0.00            
ATOM   2327  HW1 HOH X 760      25.427  21.454  11.096  0.00  0.00            
ATOM   2328  HW2 HOH X 760      24.952  20.765  12.358  0.00  0.00            
ATOM   2329  OW  HOH X 761      25.780  10.432  26.545  0.00  0.00            
ATOM   2330  HW1 HOH X 761      25.253  10.420  25.746  0.00  0.00            
ATOM   2331  HW2 HOH X 761      26.063   9.524  26.660  0.00  0.00            
ATOM   2332  OW  HOH X 762       4.283  23.843  21.659  0.00  0.00            
ATOM   2333  HW1 HOH X 762       4.196  24.720  21.285  0.00  0.00            
ATOM   2334  HW2 HOH X 762       4.936  23.411  21.108  0.00  0.00            
ATOM   2335  OW  HOH X 763      -0.706   2.736  33.243  0.00  0.00            
ATOM   2336  HW1 HOH X 763       0.014   3.040  32.691  0.00  0.00            
ATOM   2337  HW2 HOH X 763      -1.490   2.872  32.710  0.00  0.00            
ATOM   2338  OW  HOH X 764       7.675  -1.812  21.793  0.00  0.00            
ATOM   2339  HW1 HOH X 764       8.141  -1.098  22.226  0.00  0.00            
ATOM   2340  HW2 HOH X 764       6.781  -1.756  22.132  0.00  0.00            
ATOM   2341  OW  HOH X 765      10.313  23.288  14.863  0.00  0.00            
ATOM   2342  HW1 HOH X 765       9.733  22.537  14.735  0.00  0.00            
ATOM   2343  HW2 HOH X 765      10.223  23.504  15.791  0.00  0.00            
ATOM   2344  OW  HOH X 766       6.273   1.823   9.788  0.00  0.00            
ATOM   2345  HW1 HOH X 766       6.964   2.485   9.765  0.00  0.00            
ATOM   2346  HW2 HOH X 766       6.708   1.034  10.112  0.00  0.00            
ATOM   2347  OW  HOH X 767      29.964   6.159  26.883  0.00  0.00            
ATOM   2348  HW1 HOH X 767      29.682   6.687  27.630  0.00  0.00            
ATOM   2349  HW2 HOH X 767      30.513   5.475  27.267  0.00  0.00            
ATOM   2350  OW  HOH X 768      -1.570   4.571  23.813  0.00  0.00            
ATOM   2351  HW1 HOH X 768      -1.624   5.479  24.111  0.00  0.00            
ATOM   2352  HW2 HOH X 768      -0.643   4.347  23.894  0.00  0.00            
ATOM   2353  OW  HOH X 769      -2.108  11.903  21.067  0.00  0.00            
ATOM   2354  HW1 HOH X 769      -2.296  11.306  20.343  0.00  0.00            
ATOM   2355  HW2 HOH X 769      -1.918  12.740  20.645  0.00  0.00            
ATOM   2356  OW  HOH X 770      17.268  19.644  16.999  0.00  0.00            
ATOM   2357  HW1 HOH X 770      16.490  20.176  16.830  0.00  0.00            
ATOM   2358  HW2 HOH X 770      17.986  20.134  16.599  0.00  0.00            
ATOM   2359  OW  HOH X 771      10.163  26.476  21.938  0.00  0.00            
ATOM   2360  HW1 HOH X 771      10.765  27.028  22.437  0.00  0.00            
ATOM   2361  HW2 HOH X 771       9.611  26.062  22.601  0.00  0.00            
ATOM   2362  OW  HOH X 772      25.465   8.885  18.584  0.00  0.00            
ATOM   2363  HW1 HOH X 772      25.170   9.555  19.201  0.00  0.00            
ATOM   2364  HW2 HOH X 772      26.026   9.356  17.968  0.00  0.00            
ATOM   2365  OW  HOH X 773       1.961   4.146  20.499  0.00  0.00            
ATOM   2366  HW1 HOH X 773       1.093   4.357  20.844  0.00  0.00            
ATOM   2367  HW2 HOH X 773       2.410   4.989  20.447  0.00  0.00            
ATOM   2368  OW  HOH X 774      32.864  25.757  10.272  0.00  0.00            
ATOM   2369  HW1 HOH X 774      32.473  25.344   9.502  0.00  0.00            
ATOM   2370  HW2 HOH X 774      32.657  26.686  10.178  0.00  0.00            
ATOM   2371  OW  HOH X 775      26.037  12.687  14.494  0.00  0.00            
ATOM   2372  HW1 HOH X 775      26.870  12.232  14.364  0.00  0.00            
ATOM   2373  HW2 HOH X 775      25.762  12.940  13.612  0.00  0.00            
ATOM   2374  OW  HOH X 776      26.801   9.898  29.297  0.00  0.00            
ATOM   2375  HW1 HOH X 776      26.241  10.663  29.166  0.00  0.00            
ATOM   2376  HW2 HOH X 776      27.029   9.612  28.413  0.00  0.00            
ATOM   2377  OW  HOH X 777      10.308  -1.408  18.009  0.00  0.00            
ATOM   2378  HW1 HOH X 777      10.855  -1.846  18.661  0.00  0.00            
ATOM   2379  HW2 HOH X 777      10.004  -2.112  17.438  0.00  0.00            
ATOM   2380  OW  HOH X 778      28.251  10.769  37.316  0.00  0.00            
ATOM   2381  HW1 HOH X 778      29.003  10.816  37.907  0.00  0.00            
ATOM   2382  HW2 HOH X 778      28.633  10.611  36.453  0.00  0.00            
ATOM   2383  OW  HOH X 779       6.253   7.040  16.552  0.00  0.00            
ATOM   2384  HW1 HOH X 779       6.602   6.149  16.514  0.00  0.00            
ATOM   2385  HW2 HOH X 779       6.604   7.400  17.366  0.00  0.00            
ATOM   2386  OW  HOH X 780      18.544  26.472  32.263  0.00  0.00            
ATOM   2387  HW1 HOH X 780      18.425  25.588  31.915  0.00  0.00            
ATOM   2388  HW2 HOH X 780      18.543  26.357  33.214  0.00  0.00            
ATOM   2389  OW  HOH X 781      29.598  23.370  29.100  0.00  0.00            
ATOM   2390  HW1 HOH X 781      29.866  23.617  29.985  0.00  0.00            
ATOM   2391  HW2 HOH X 781      29.693  24.173  28.588  0.00  0.00            
ATOM   2392  OW  HOH X 782       8.399   0.992  -0.476  0.00  0.00            
ATOM   2393  HW1 HOH X 782       8.346   1.548  -1.253  0.00  0.00            
ATOM   2394  HW2 HOH X 782       7.640   1.241   0.051  0.00  0.00            
ATOM   2395  OW  HOH X 783      14.731  27.843  22.928  0.00  0.00            
ATOM   2396  HW1 HOH X 783      15.107  27.956  22.055  0.00  0.00            
ATOM   2397  HW2 HOH X 783      14.494  26.917  22.970  0.00  0.00            
ATOM   2398  OW  HOH X 784      23.932   6.330  12.562  0.00  0.00            
ATOM   2399  HW1 HOH X 784      23.161   5.770  12.655  0.00  0.00            
ATOM   2400  HW2 HOH X 784      24.674   5.728  12.626  0.00  0.00            
ATOM   2401  OW  HOH X 785      20.476  14.527  40.415  0.00  0.00            
ATOM   2402  HW1 HOH X 785      19.682  14.527  39.881  0.00  0.00            
ATOM   2403  HW2 HOH X 785      20.457  13.686  40.873  0.00  0.00            
ATOM   2404  OW  HOH X 786      15.428  13.289  15.051  0.00  0.00            
ATOM   2405  HW1 HOH X 786      15.846  12.787  14.352  0.00  0.00            
ATOM   2406  HW2 HOH X 786      14.747  13.796  14.608  0.00  0.00            
ATOM   2407  OW  HOH X 787       0.410   2.946  35.844  0.00  0.00            
ATOM   2408  HW1 HOH X 787      -0.227   2.486  36.390  0.00  0.00            
ATOM   2409  HW2 HOH X 787      -0.065   3.147  35.038  0.00  0.00            
ATOM   2410  OW  HOH X 788      11.515  27.870  23.634  0.00  0.00            
ATOM   2411  HW1 HOH X 788      11.203  28.774  23.622  0.00  0.00            
ATOM   2412  HW2 HOH X 788      12.396  27.925  24.005  0.00  0.00            
ATOM   2413  OW  HOH X 789       9.582  17.004  33.732  0.00  0.00            
ATOM   2414  HW1 HOH X 789       9.218  17.848  33.465  0.00  0.00            
ATOM   2415  HW2 HOH X 789       9.605  17.044  34.688  0.00  0.00            
ATOM   2416  OW  HOH X 790      15.188   6.686  29.728  0.00  0.00            
ATOM   2417  HW1 HOH X 790      15.562   7.443  29.277  0.00  0.00            
ATOM   2418  HW2 HOH X 790      15.550   6.730  30.613  0.00  0.00            
ATOM   2419  OW  HOH X 791      25.426  -0.657  21.986  0.00  0.00            
ATOM   2420  HW1 HOH X 791      26.120  -1.272  21.748  0.00  0.00            
ATOM   2421  HW2 HOH X 791      25.623  -0.411  22.890  0.00  0.00            
ATOM   2422  OW  HOH X 792      23.452  21.790  40.754  0.00  0.00            
ATOM   2423  HW1 HOH X 792      23.534  20.923  41.150  0.00  0.00            
ATOM   2424  HW2 HOH X 792      24.344  22.020  40.494  0.00  0.00            
ATOM   2425  OW  HOH X 793      23.774  -2.140  25.247  0.00  0.00            
ATOM   2426  HW1 HOH X 793      24.185  -2.244  26.106  0.00  0.00            
ATOM   2427  HW2 HOH X 793      23.304  -2.962  25.106  0.00  0.00            
ATOM   2428  OW  HOH X 794      22.981  22.778  21.765  0.00  0.00            
ATOM   2429  HW1 HOH X 794      23.571  23.521  21.642  0.00  0.00            
ATOM   2430  HW2 HOH X 794      22.103  23.153  21.690  0.00  0.00            
ATOM   2431  OW  HOH X 795      26.517   5.001  27.129  0.00  0.00            
ATOM   2432  HW1 HOH X 795      26.775   4.128  27.424  0.00  0.00            
ATOM   2433  HW2 HOH X 795      26.129   4.858  26.266  0.00  0.00            
ATOM   2434  OW  HOH X 796       1.794  24.648  17.615  0.00  0.00            
ATOM   2435  HW1 HOH X 796       1.548  24.149  16.836  0.00  0.00            
ATOM   2436  HW2 HOH X 796       2.295  24.031  18.147  0.00  0.00            
ATOM   2437  OW  HOH X 797       8.877  29.124  19.967  0.00  0.00            
ATOM   2438  HW1 HOH X 797       9.614  29.602  20.347  0.00  0.00            
ATOM   2439  HW2 HOH X 797       8.792  28.341  20.512  0.00  0.00            
ATOM   2440  OW  HOH X 798      -3.268  12.144  12.983  0.00  0.00            
ATOM   2441  HW1 HOH X 798      -3.013  11.227  13.084  0.00  0.00            
ATOM   2442  HW2 HOH X 798      -2.481  12.576  12.651  0.00  0.00            
ATOM   2443  OW  HOH X 799       4.989  -5.765  25.755  0.00  0.00            
ATOM   2444  HW1 HOH X 799       5.152  -5.859  26.694  0.00  0.00            
ATOM   2445  HW2 HOH X 799       5.859  -5.801  25.357  0.00  0.00            
ATOM   2446  OW  HOH X 800      32.803   4.657  24.702  0.00  0.00            
ATOM   2447  HW1 HOH X 800      33.722   4.917  24.641  0.00  0.00            
ATOM   2448  HW2 HOH X 800      32.728   4.240  25.560  0.00  0.00            
ATOM   2449  OW  HOH X 801      29.557  21.028   8.845  0.00  0.00            
ATOM   2450  HW1 HOH X 801      29.550  21.017   9.802  0.00  0.00            
ATOM   2451  HW2 HOH X 801      30.443  21.309   8.615  0.00  0.00            
ATOM   2452  OW  HOH X 802       2.526   1.747  19.508  0.00  0.00            
ATOM   2453  HW1 HOH X 802       1.980   2.388  19.963  0.00  0.00            
ATOM   2454  HW2 HOH X 802       2.230   1.781  18.598  0.00  0.00            
ATOM   2455  OW  HOH X 803      24.382   8.945  13.519  0.00  0.00            
ATOM   2456  HW1 HOH X 803      24.465   7.992  13.543  0.00  0.00            
ATOM   2457  HW2 HOH X 803      25.263   9.268  13.706  0.00  0.00            
ATOM   2458  OW  HOH X 804      31.791  21.068  26.854  0.00  0.00            
ATOM   2459  HW1 HOH X 804      31.583  21.923  26.478  0.00  0.00            
ATOM   2460  HW2 HOH X 804      32.656  21.183  27.248  0.00  0.00            
ATOM   2461  OW  HOH X 805       6.325 -11.555  22.030  0.00  0.00            
ATOM   2462  HW1 HOH X 805       5.841 -12.200  21.513  0.00  0.00            
ATOM   2463  HW2 HOH X 805       7.234 -11.852  21.994  0.00  0.00            
ATOM   2464  OW  HOH X 806      28.507  15.993  38.299  0.00  0.00            
ATOM   2465  HW1 HOH X 806      28.744  16.158  39.211  0.00  0.00            
ATOM   2466  HW2 HOH X 806      27.810  15.339  38.346  0.00  0.00            
ATOM   2467  OW  HOH X 807       7.737  10.105  27.863  0.00  0.00            
ATOM   2468  HW1 HOH X 807       8.251  10.041  28.667  0.00  0.00            
ATOM   2469  HW2 HOH X 807       8.219  10.727  27.318  0.00  0.00            
ATOM   2470  OW  HOH X 808      21.411   0.905  19.081  0.00  0.00            
ATOM   2471  HW1 HOH X 808      22.105   0.722  19.714  0.00  0.00            
ATOM   2472  HW2 HOH X 808      20.870   0.116  19.082  0.00  0.00            
ATOM   2473  OW  HOH X 809      18.413  11.813  41.818  0.00  0.00            
ATOM   2474  HW1 HOH X 809      19.353  11.913  41.966  0.00  0.00            
ATOM   2475  HW2 HOH X 809      18.011  12.069  42.648  0.00  0.00            
ATOM   2476  OW  HOH X 810      26.906  26.799  16.493  0.00  0.00            
ATOM   2477  HW1 HOH X 810      27.401  25.981  16.447  0.00  0.00            
ATOM   2478  HW2 HOH X 810      26.196  26.686  15.860  0.00  0.00            
ATOM   2479  OW  HOH X 811       5.960   2.078  23.389  0.00  0.00            
ATOM   2480  HW1 HOH X 811       5.912   1.127  23.292  0.00  0.00            
ATOM   2481  HW2 HOH X 811       5.889   2.227  24.331  0.00  0.00            
ATOM   2482  OW  HOH X 812       6.193  13.301  17.730  0.00  0.00            
ATOM   2483  HW1 HOH X 812       6.917  13.192  18.347  0.00  0.00            
ATOM   2484  HW2 HOH X 812       6.579  13.766  16.988  0.00  0.00            
ATOM   2485  OW  HOH X 813      24.587  11.614  34.773  0.00  0.00            
ATOM   2486  HW1 HOH X 813      24.680  12.275  34.087  0.00  0.00            
ATOM   2487  HW2 HOH X 813      24.816  10.789  34.345  0.00  0.00            
ATOM   2488  OW  HOH X 814      10.212  24.331  17.187  0.00  0.00            
ATOM   2489  HW1 HOH X 814       9.845  23.733  17.839  0.00  0.00            
ATOM   2490  HW2 HOH X 814      10.762  24.929  17.693  0.00  0.00            
ATOM   2491  OW  HOH X 815      21.022   4.966  20.996  0.00  0.00            
ATOM   2492  HW1 HOH X 815      21.013   5.467  20.180  0.00  0.00            
ATOM   2493  HW2 HOH X 815      21.488   5.526  21.617  0.00  0.00            
ATOM   2494  OW  HOH X 816      36.104  15.477  22.305  0.00  0.00            
ATOM   2495  HW1 HOH X 816      35.234  15.149  22.531  0.00  0.00            
ATOM   2496  HW2 HOH X 816      36.676  14.713  22.380  0.00  0.00            
ATOM   2497  OW  HOH X 817      -2.051   7.486  11.462  0.00  0.00            
ATOM   2498  HW1 HOH X 817      -2.695   6.805  11.269  0.00  0.00            
ATOM   2499  HW2 HOH X 817      -1.206   7.078  11.271  0.00  0.00            
ATOM   2500  OW  HOH X 818      14.188  -0.334  12.713  0.00  0.00            
ATOM   2501  HW1 HOH X 818      13.921  -1.122  12.239  0.00  0.00            
ATOM   2502  HW2 HOH X 818      13.512   0.311  12.505  0.00  0.00            
ATOM   2503  OW  HOH X 819      22.881  30.789  21.003  0.00  0.00            
ATOM   2504  HW1 HOH X 819      23.191  31.542  20.501  0.00  0.00            
ATOM   2505  HW2 HOH X 819      21.980  31.012  21.239  0.00  0.00            
ATOM   2506  OW  HOH X 820      20.527  22.509  34.210  0.00  0.00            
ATOM   2507  HW1 HOH X 820      19.618  22.210  34.218  0.00  0.00            
ATOM   2508  HW2 HOH X 820      20.521  23.310  34.734  0.00  0.00            
ATOM   2509  OW  HOH X 821       1.449   2.514  25.161  0.00  0.00            
ATOM   2510  HW1 HOH X 821       1.994   2.397  24.382  0.00  0.00            
ATOM   2511  HW2 HOH X 821       2.026   2.939  25.796  0.00  0.00            
ATOM   2512  OW  HOH X 822       4.785  -2.925  16.601  0.00  0.00            
ATOM   2513  HW1 HOH X 822       5.496  -2.390  16.249  0.00  0.00            
ATOM   2514  HW2 HOH X 822       4.046  -2.757  16.016  0.00  0.00            
ATOM   2515  OW  HOH X 823      21.154   8.560   5.671  0.00  0.00            
ATOM   2516  HW1 HOH X 823      20.651   9.124   6.258  0.00  0.00            
ATOM   2517  HW2 HOH X 823      20.756   8.693   4.811  0.00  0.00            
ATOM   2518  OW  HOH X 824      10.950   7.729  36.080  0.00  0.00            
ATOM   2519  HW1 HOH X 824      10.481   7.206  35.430  0.00  0.00            
ATOM   2520  HW2 HOH X 824      11.763   7.982  35.643  0.00  0.00            
ATOM   2521  OW  HOH X 825      29.621  25.207  13.448  0.00  0.00            
ATOM   2522  HW1 HOH X 825      30.334  25.811  13.654  0.00  0.00            
ATOM   2523  HW2 HOH X 825      29.799  24.433  13.983  0.00  0.00            
ATOM   2524  OW  HOH X 826      35.751  24.414   9.212  0.00  0.00            
ATOM   2525  HW1 HOH X 826      35.810  23.632   9.761  0.00  0.00            
ATOM   2526  HW2 HOH X 826      35.849  25.145   9.823  0.00  0.00            
ATOM   2527  OW  HOH X 827      15.518   5.532  35.977  0.00  0.00            
ATOM   2528  HW1 HOH X 827      16.352   5.965  35.795  0.00  0.00            
ATOM   2529  HW2 HOH X 827      15.763   4.695  36.372  0.00  0.00            
ATOM   2530  OW  HOH X 828      24.113  17.571  15.024  0.00  0.00            
ATOM   2531  HW1 HOH X 828      24.146  16.656  14.745  0.00  0.00            
ATOM   2532  HW2 HOH X 828      24.570  17.581  15.865  0.00  0.00            
ATOM   2533  OW  HOH X 829      31.159  15.937  36.888  0.00  0.00            
ATOM   2534  HW1 HOH X 829      31.866  16.025  37.528  0.00  0.00            
ATOM   2535  HW2 HOH X 829      30.474  15.456  37.352  0.00  0.00            
ATOM   2536  OW  HOH X 830      -1.725   4.451  15.200  0.00  0.00            
ATOM   2537  HW1 HOH X 830      -1.374   4.514  14.311  0.00  0.00            
ATOM   2538  HW2 HOH X 830      -2.649   4.236  15.079  0.00  0.00            
ATOM   2539  OW  HOH X 831       7.616  14.875  15.730  0.00  0.00            
ATOM   2540  HW1 HOH X 831       7.070  14.305  15.189  0.00  0.00            
ATOM   2541  HW2 HOH X 831       7.241  15.748  15.614  0.00  0.00            
ATOM   2542  OW  HOH X 832      24.962  -3.656  18.387  0.00  0.00            
ATOM   2543  HW1 HOH X 832      25.134  -4.254  17.660  0.00  0.00            
ATOM   2544  HW2 HOH X 832      24.955  -4.216  19.163  0.00  0.00            
ATOM   2545  OW  HOH X 833      16.697  23.490  18.122  0.00  0.00            
ATOM   2546  HW1 HOH X 833      17.517  23.916  17.872  0.00  0.00            
ATOM   2547  HW2 HOH X 833      16.018  24.004  17.685  0.00  0.00            
ATOM   2548  OW  HOH X 834       9.862  11.883  26.740  0.00  0.00            
ATOM   2549  HW1 HOH X 834       9.790  12.632  26.148  0.00  0.00            
ATOM   2550  HW2 HOH X 834       9.898  11.122  26.161  0.00  0.00            
ATOM   2551  OW  HOH X 835      25.997  14.835  35.488  0.00  0.00            
ATOM   2552  HW1 HOH X 835      26.933  14.643  35.431  0.00  0.00            
ATOM   2553  HW2 HOH X 835      25.843  14.999  36.419  0.00  0.00            
ATOM   2554  OW  HOH X 836       6.146   1.320  17.278  0.00  0.00            
ATOM   2555  HW1 HOH X 836       6.222   0.750  18.043  0.00  0.00            
ATOM   2556  HW2 HOH X 836       7.019   1.315  16.886  0.00  0.00            
ATOM   2557  OW  HOH X 837      -5.788  11.030  21.779  0.00  0.00            
ATOM   2558  HW1 HOH X 837      -5.908  11.898  21.393  0.00  0.00            
ATOM   2559  HW2 HOH X 837      -5.317  10.533  21.110  0.00  0.00            
ATOM   2560  OW  HOH X 838       3.367  16.608  15.282  0.00  0.00            
ATOM   2561  HW1 HOH X 838       3.400  17.553  15.426  0.00  0.00            
ATOM   2562  HW2 HOH X 838       4.244  16.299  15.511  0.00  0.00            
ATOM   2563  OW  HOH X 839      19.693  -1.241  18.921  0.00  0.00            
ATOM   2564  HW1 HOH X 839      19.848  -0.975  18.015  0.00  0.00            
ATOM   2565  HW2 HOH X 839      20.446  -1.788  19.143  0.00  0.00            
ATOM   2566  OW  HOH X 840      18.269  24.355  30.473  0.00  0.00            
ATOM   2567  HW1 HOH X 840      18.700  23.500  30.488  0.00  0.00            
ATOM   2568  HW2 HOH X 840      17.383  24.182  30.790  0.00  0.00            
ATOM   2569  OW  HOH X 841      11.714 -13.035  12.290  0.00  0.00            
ATOM   2570  HW1 HOH X 841      12.646 -12.882  12.443  0.00  0.00            
ATOM   2571  HW2 HOH X 841      11.417 -12.257  11.818  0.00  0.00            
ATOM   2572  OW  HOH X 842      16.653  -7.283  12.657  0.00  0.00            
ATOM   2573  HW1 HOH X 842      16.226  -6.506  13.017  0.00  0.00            
ATOM   2574  HW2 HOH X 842      16.022  -7.634  12.029  0.00  0.00            
ATOM   2575  OW  HOH X 843      12.708   5.302  23.420  0.00  0.00            
ATOM   2576  HW1 HOH X 843      12.091   5.611  22.757  0.00  0.00            
ATOM   2577  HW2 HOH X 843      12.176   4.773  24.014  0.00  0.00            
ATOM   2578  OW  HOH X 844      23.395  26.643  24.228  0.00  0.00            
ATOM   2579  HW1 HOH X 844      24.200  26.574  24.742  0.00  0.00            
ATOM   2580  HW2 HOH X 844      23.517  27.429  23.696  0.00  0.00            
ATOM   2581  OW  HOH X 845      16.717  15.624   6.224  0.00  0.00            
ATOM   2582  HW1 HOH X 845      17.542  15.139   6.224  0.00  0.00            
ATOM   2583  HW2 HOH X 845      16.406  15.570   5.320  0.00  0.00            
ATOM   2584  OW  HOH X 846      -4.742   9.576  19.895  0.00  0.00            
ATOM   2585  HW1 HOH X 846      -3.910   9.139  19.715  0.00  0.00            
ATOM   2586  HW2 HOH X 846      -5.401   9.020  19.479  0.00  0.00            
ATOM   2587  OW  HOH X 847       9.425  14.938  18.280  0.00  0.00            
ATOM   2588  HW1 HOH X 847       9.595  13.997  18.322  0.00  0.00            
ATOM   2589  HW2 HOH X 847       8.754  15.030  17.603  0.00  0.00            
ATOM   2590  OW  HOH X 848      23.499   1.789  15.877  0.00  0.00            
ATOM   2591  HW1 HOH X 848      23.013   2.060  15.098  0.00  0.00            
ATOM   2592  HW2 HOH X 848      23.536   2.575  16.423  0.00  0.00            
ATOM   2593  OW  HOH X 849       4.870   4.692  37.497  0.00  0.00            
ATOM   2594  HW1 HOH X 849       4.681   4.002  38.132  0.00  0.00            
ATOM   2595  HW2 HOH X 849       5.656   5.121  37.835  0.00  0.00            
ATOM   2596  OW  HOH X 850      20.114   3.886  15.607  0.00  0.00            
ATOM   2597  HW1 HOH X 850      20.739   3.794  16.326  0.00  0.00            
ATOM   2598  HW2 HOH X 850      19.295   4.142  16.031  0.00  0.00            
ATOM   2599  OW  HOH X 851       8.041  11.139  15.036  0.00  0.00            
ATOM   2600  HW1 HOH X 851       8.323  10.646  15.807  0.00  0.00            
ATOM   2601  HW2 HOH X 851       8.853  11.457  14.643  0.00  0.00            
ATOM   2602  OW  HOH X 852      16.767  18.507  32.612  0.00  0.00            
ATOM   2603  HW1 HOH X 852      16.553  19.298  33.108  0.00  0.00            
ATOM   2604  HW2 HOH X 852      17.724  18.474  32.613  0.00  0.00            
ATOM   2605  OW  HOH X 853      -2.230  12.882   7.242  0.00  0.00            
ATOM   2606  HW1 HOH X 853      -2.204  12.680   8.178  0.00  0.00            
ATOM   2607  HW2 HOH X 853      -1.310  12.934   6.982  0.00  0.00            
ATOM   2608  OW  HOH X 854       5.674  -3.797  11.810  0.00  0.00            
ATOM   2609  HW1 HOH X 854       5.605  -4.615  11.317  0.00  0.00            
ATOM   2610  HW2 HOH X 854       6.348  -3.969  12.468  0.00  0.00            
ATOM   2611  OW  HOH X 855      19.623  -5.569  24.602  0.00  0.00            
ATOM   2612  HW1 HOH X 855      18.694  -5.650  24.390  0.00  0.00            
ATOM   2613  HW2 HOH X 855      19.782  -4.625  24.630  0.00  0.00            
ATOM   2614  OW  HOH X 856      29.250  12.371  31.866  0.00  0.00            
ATOM   2615  HW1 HOH X 856      29.833  11.661  32.135  0.00  0.00            
ATOM   2616  HW2 HOH X 856      29.783  12.911  31.283  0.00  0.00            
ATOM   2617  OW  HOH X 857      22.700  20.209  10.407  0.00  0.00            
ATOM   2618  HW1 HOH X 857      22.919  20.989  10.916  0.00  0.00            
ATOM   2619  HW2 HOH X 857      23.204  20.301   9.598  0.00  0.00            
ATOM   2620  OW  HOH X 858      23.999   3.241  12.189  0.00  0.00            
ATOM   2621  HW1 HOH X 858      23.646   3.362  11.307  0.00  0.00            
ATOM   2622  HW2 HOH X 858      23.326   2.740  12.650  0.00  0.00            
ATOM   2623  OW  HOH X 859      29.008  21.467  31.765  0.00  0.00            
ATOM   2624  HW1 HOH X 859      29.223  20.749  32.360  0.00  0.00            
ATOM   2625  HW2 HOH X 859      28.607  21.039  31.009  0.00  0.00            
ATOM   2626  OW  HOH X 860      27.076   2.168  30.252  0.00  0.00            
ATOM   2627  HW1 HOH X 860      26.701   1.314  30.469  0.00  0.00            
ATOM   2628  HW2 HOH X 860      27.125   2.172  29.296  0.00  0.00            
ATOM   2629  OW  HOH X 861      14.328   8.493  10.812  0.00  0.00            
ATOM   2630  HW1 HOH X 861      13.447   8.672  11.142  0.00  0.00            
ATOM   2631  HW2 HOH X 861      14.574   9.290  10.342  0.00  0.00            
ATOM   2632  OW  HOH X 862      12.762  13.512  16.266  0.00  0.00            
ATOM   2633  HW1 HOH X 862      12.637  13.796  15.361  0.00  0.00            
ATOM   2634  HW2 HOH X 862      13.680  13.246  16.310  0.00  0.00            
ATOM   2635  OW  HOH X 863      17.742  12.183  13.831  0.00  0.00            
ATOM   2636  HW1 HOH X 863      17.557  11.310  13.484  0.00  0.00            
ATOM   2637  HW2 HOH X 863      17.700  12.758  13.067  0.00  0.00            
ATOM   2638  OW  HOH X 864      -0.244  10.556   8.250  0.00  0.00            
ATOM   2639  HW1 HOH X 864      -0.959  10.878   7.700  0.00  0.00            
ATOM   2640  HW2 HOH X 864      -0.395   9.613   8.312  0.00  0.00            
ATOM   2641  OW  HOH X 865      18.891   9.057   9.668  0.00  0.00            
ATOM   2642  HW1 HOH X 865      18.645   9.673   8.979  0.00  0.00            
ATOM   2643  HW2 HOH X 865      19.793   8.812   9.461  0.00  0.00            
ATOM   2644  OW  HOH X 866      22.371  18.788  18.745  0.00  0.00            
ATOM   2645  HW1 HOH X 866      21.906  18.588  19.558  0.00  0.00            
ATOM   2646  HW2 HOH X 866      21.952  18.234  18.087  0.00  0.00            
ATOM   2647  OW  HOH X 867      19.660  16.455  36.321  0.00  0.00            
ATOM   2648  HW1 HOH X 867      19.380  15.541  36.374  0.00  0.00            
ATOM   2649  HW2 HOH X 867      19.470  16.815  37.188  0.00  0.00            
ATOM   2650  OW  HOH X 868       2.614   3.839  16.579  0.00  0.00            
ATOM   2651  HW1 HOH X 868       3.466   3.490  16.319  0.00  0.00            
ATOM   2652  HW2 HOH X 868       2.045   3.070  16.628  0.00  0.00            
ATOM   2653  OW  HOH X 869      13.578  15.172  11.276  0.00  0.00            
ATOM   2654  HW1 HOH X 869      13.196  15.874  10.748  0.00  0.00            
ATOM   2655  HW2 HOH X 869      14.420  15.522  11.568  0.00  0.00            
ATOM   2656  OW  HOH X 870      11.248  20.133  19.366  0.00  0.00            
ATOM   2657  HW1 HOH X 870      10.930  19.298  19.024  0.00  0.00            
ATOM   2658  HW2 HOH X 870      10.581  20.769  19.107  0.00  0.00            
ATOM   2659  OW  HOH X 871       6.982   7.591  13.866  0.00  0.00            
ATOM   2660  HW1 HOH X 871       6.574   7.773  14.712  0.00  0.00            
ATOM   2661  HW2 HOH X 871       6.265   7.269  13.318  0.00  0.00            
ATOM   2662  OW  HOH X 872      12.202  -7.729  23.414  0.00  0.00            
ATOM   2663  HW1 HOH X 872      12.983  -7.177  23.451  0.00  0.00            
ATOM   2664  HW2 HOH X 872      11.602  -7.258  22.836  0.00  0.00            
ATOM   2665  OW  HOH X 873       3.176   4.872  35.033  0.00  0.00            
ATOM   2666  HW1 HOH X 873       3.446   4.840  35.951  0.00  0.00            
ATOM   2667  HW2 HOH X 873       3.109   5.806  34.835  0.00  0.00            
ATOM   2668  OW  HOH X 874      16.154  -1.516  23.158  0.00  0.00            
ATOM   2669  HW1 HOH X 874      16.310  -1.364  24.090  0.00  0.00            
ATOM   2670  HW2 HOH X 874      15.598  -0.786  22.885  0.00  0.00            
ATOM   2671  OW  HOH X 875       4.806   2.899   6.566  0.00  0.00            
ATOM   2672  HW1 HOH X 875       4.923   3.848   6.513  0.00  0.00            
ATOM   2673  HW2 HOH X 875       4.823   2.708   7.504  0.00  0.00            
ATOM   2674  OW  HOH X 876      16.826  11.322   6.091  0.00  0.00            
ATOM   2675  HW1 HOH X 876      16.375  10.705   6.667  0.00  0.00            
ATOM   2676  HW2 HOH X 876      16.136  11.675   5.529  0.00  0.00            
ATOM   2677  OW  HOH X 877      12.614   0.253  16.909  0.00  0.00            
ATOM   2678  HW1 HOH X 877      13.156  -0.068  17.629  0.00  0.00            
ATOM   2679  HW2 HOH X 877      11.759   0.416  17.306  0.00  0.00            
ATOM   2680  OW  HOH X 878      10.461  15.787  23.583  0.00  0.00            
ATOM   2681  HW1 HOH X 878      10.140  16.677  23.728  0.00  0.00            
ATOM   2682  HW2 HOH X 878      10.364  15.648  22.641  0.00  0.00            
ATOM   2683  OW  HOH X 879      28.887  19.369  20.079  0.00  0.00            
ATOM   2684  HW1 HOH X 879      29.748  19.528  20.468  0.00  0.00            
ATOM   2685  HW2 HOH X 879      28.749  18.427  20.178  0.00  0.00            
ATOM   2686  OW  HOH X 880      11.395   6.650  -1.315  0.00  0.00            
ATOM   2687  HW1 HOH X 880      10.986   6.308  -0.520  0.00  0.00            
ATOM   2688  HW2 HOH X 880      12.242   6.987  -1.022  0.00  0.00            
ATOM   2689  OW  HOH X 881      10.403   1.532  17.709  0.00  0.00            
ATOM   2690  HW1 HOH X 881       9.755   2.026  18.211  0.00  0.00            
ATOM   2691  HW2 HOH X 881      10.276   0.624  17.981  0.00  0.00            
ATOM   2692  OW  HOH X 882       3.676  -3.877  22.278  0.00  0.00            
ATOM   2693  HW1 HOH X 882       3.717  -4.833  22.282  0.00  0.00            
ATOM   2694  HW2 HOH X 882       3.306  -3.649  23.131  0.00  0.00            
ATOM   2695  OW  HOH X 883       8.186  10.608   2.318  0.00  0.00            
ATOM   2696  HW1 HOH X 883       8.494  10.915   1.465  0.00  0.00            
ATOM   2697  HW2 HOH X 883       7.626  11.314   2.640  0.00  0.00            
ATOM   2698  OW  HOH X 884      37.451  11.397  27.747  0.00  0.00            
ATOM   2699  HW1 HOH X 884      37.794  11.883  26.997  0.00  0.00            
ATOM   2700  HW2 HOH X 884      38.217  11.236  28.299  0.00  0.00            
ATOM   2701  OW  HOH X 885      37.113  13.084  25.071  0.00  0.00            
ATOM   2702  HW1 HOH X 885      36.345  13.083  24.499  0.00  0.00            
ATOM   2703  HW2 HOH X 885      37.803  12.679  24.546  0.00  0.00            
ATOM   2704  OW  HOH X 886      15.914  23.631  28.210  0.00  0.00            
ATOM   2705  HW1 HOH X 886      15.408  23.017  27.678  0.00  0.00            
ATOM   2706  HW2 HOH X 886      15.845  24.465  27.745  0.00  0.00            
ATOM   2707  OW  HOH X 887      25.720   4.954  15.064  0.00  0.00            
ATOM   2708  HW1 HOH X 887      24.861   4.535  15.120  0.00  0.00            
ATOM   2709  HW2 HOH X 887      25.826   5.397  15.906  0.00  0.00            
ATOM   2710  OW  HOH X 888      25.420  15.497   5.691  0.00  0.00            
ATOM   2711  HW1 HOH X 888      25.572  16.428   5.854  0.00  0.00            
ATOM   2712  HW2 HOH X 888      26.105  15.052   6.189  0.00  0.00            
ATOM   2713  OW  HOH X 889      28.043   9.849  18.751  0.00  0.00            
ATOM   2714  HW1 HOH X 889      28.282  10.680  18.341  0.00  0.00            
ATOM   2715  HW2 HOH X 889      28.052  10.033  19.690  0.00  0.00            
ATOM   2716  OW  HOH X 890      15.079   4.848   6.299  0.00  0.00            
ATOM   2717  HW1 HOH X 890      15.331   4.422   7.118  0.00  0.00            
ATOM   2718  HW2 HOH X 890      15.677   4.486   5.646  0.00  0.00            
ATOM   2719  OW  HOH X 891      29.908   7.877  29.123  0.00  0.00            
ATOM   2720  HW1 HOH X 891      29.592   7.406  29.894  0.00  0.00            
ATOM   2721  HW2 HOH X 891      29.881   8.799  29.377  0.00  0.00            
ATOM   2722  OW  HOH X 892      28.045  19.327  40.153  0.00  0.00            
ATOM   2723  HW1 HOH X 892      28.365  18.518  40.552  0.00  0.00            
ATOM   2724  HW2 HOH X 892      27.476  19.714  40.819  0.00  0.00            
ATOM   2725  OW  HOH X 893       8.646  10.033  30.498  0.00  0.00            
ATOM   2726  HW1 HOH X 893       9.034  10.559  31.197  0.00  0.00            
ATOM   2727  HW2 HOH X 893       7.938   9.551  30.925  0.00  0.00            
ATOM   2728  OW  HOH X 894       7.399  -2.113  15.520  0.00  0.00            
ATOM   2729  HW1 HOH X 894       7.685  -2.761  16.164  0.00  0.00            
ATOM   2730  HW2 HOH X 894       8.020  -2.202  14.797  0.00  0.00            
ATOM   2731  OW  HOH X 895      13.626  17.776  13.843  0.00  0.00            
ATOM   2732  HW1 HOH X 895      13.259  18.252  14.588  0.00  0.00            
ATOM   2733  HW2 HOH X 895      14.573  17.860  13.947  0.00  0.00            
ATOM   2734  OW  HOH X 896       6.023  21.194  15.195  0.00  0.00            
ATOM   2735  HW1 HOH X 896       5.777  21.747  14.454  0.00  0.00            
ATOM   2736  HW2 HOH X 896       5.461  21.488  15.911  0.00  0.00            
ATOM   2737  OW  HOH X 897      23.282  22.770  27.256  0.00  0.00            
ATOM   2738  HW1 HOH X 897      23.634  23.560  27.667  0.00  0.00            
ATOM   2739  HW2 HOH X 897      23.491  22.066  27.870  0.00  0.00            
ATOM   2740  OW  HOH X 898       3.334  -0.738  20.665  0.00  0.00            
ATOM   2741  HW1 HOH X 898       3.059   0.073  20.238  0.00  0.00            
ATOM   2742  HW2 HOH X 898       3.221  -1.412  19.994  0.00  0.00            
ATOM   2743  OW  HOH X 899       9.759  21.242  12.442  0.00  0.00            
ATOM   2744  HW1 HOH X 899      10.202  20.634  11.851  0.00  0.00            
ATOM   2745  HW2 HOH X 899      10.448  21.549  13.031  0.00  0.00            
ATOM   2746  OW  HOH X 900      11.743   9.055   6.078  0.00  0.00            
ATOM   2747  HW1 HOH X 900      11.960   9.967   5.882  0.00  0.00            
ATOM   2748  HW2 HOH X 900      12.578   8.590   6.012  0.00  0.00            
ATOM   2749  OW  HOH X 901      26.030  -5.682  20.395  0.00  0.00            
ATOM   2750  HW1 HOH X 901      25.601  -5.402  21.204  0.00  0.00            
ATOM   2751  HW2 HOH X 901      26.384  -6.548  20.598  0.00  0.00            
ATOM   2752  OW  HOH X 902      19.533  10.969  15.649  0.00  0.00            
ATOM   2753  HW1 HOH X 902      20.067  11.722  15.898  0.00  0.00            
ATOM   2754  HW2 HOH X 902      18.796  11.345  15.167  0.00  0.00            
ATOM   2755  OW  HOH X 903      19.681  30.212  33.318  0.00  0.00            
ATOM   2756  HW1 HOH X 903      19.509  31.113  33.044  0.00  0.00            
ATOM   2757  HW2 HOH X 903      19.424  30.189  34.240  0.00  0.00            
ATOM   2758  OW  HOH X 904       3.570  16.255  27.864  0.00  0.00            
ATOM   2759  HW1 HOH X 904       3.100  17.014  28.210  0.00  0.00            
ATOM   2760  HW2 HOH X 904       2.904  15.570  27.798  0.00  0.00            
ATOM   2761  OW  HOH X 905       7.372  12.934  11.565  0.00  0.00            
ATOM   2762  HW1 HOH X 905       8.168  12.719  11.080  0.00  0.00            
ATOM   2763  HW2 HOH X 905       6.703  12.356  11.197  0.00  0.00            
ATOM   2764  OW  HOH X 906      10.509   4.240  30.917  0.00  0.00            
ATOM   2765  HW1 HOH X 906       9.904   4.174  30.178  0.00  0.00            
ATOM   2766  HW2 HOH X 906      11.350   4.465  30.519  0.00  0.00            
ATOM   2767  OW  HOH X 907      20.828   5.464  12.512  0.00  0.00            
ATOM   2768  HW1 HOH X 907      19.913   5.545  12.781  0.00  0.00            
ATOM   2769  HW2 HOH X 907      21.260   5.042  13.255  0.00  0.00            
ATOM   2770  OW  HOH X 908       7.672   5.554   6.913  0.00  0.00            
ATOM   2771  HW1 HOH X 908       8.008   6.327   6.459  0.00  0.00            
ATOM   2772  HW2 HOH X 908       8.098   4.816   6.477  0.00  0.00            
ATOM   2773  OW  HOH X 909      24.919   6.634  28.766  0.00  0.00            
ATOM   2774  HW1 HOH X 909      25.194   6.368  29.643  0.00  0.00            
ATOM   2775  HW2 HOH X 909      25.410   6.061  28.177  0.00  0.00            
ATOM   2776  OW  HOH X 910      23.002   5.443  15.258  0.00  0.00            
ATOM   2777  HW1 HOH X 910      22.469   4.680  15.481  0.00  0.00            
ATOM   2778  HW2 HOH X 910      22.939   6.012  16.025  0.00  0.00            
ATOM   2779  OW  HOH X 911       9.925   3.705  20.545  0.00  0.00            
ATOM   2780  HW1 HOH X 911      10.231   2.851  20.850  0.00  0.00            
ATOM   2781  HW2 HOH X 911       8.971   3.626  20.529  0.00  0.00            
ATOM   2782  OW  HOH X 912       0.442   5.595  13.257  0.00  0.00            
ATOM   2783  HW1 HOH X 912       0.640   5.257  12.384  0.00  0.00            
ATOM   2784  HW2 HOH X 912       1.284   5.905  13.591  0.00  0.00            
ATOM   2785  OW  HOH X 913       2.755   9.026  11.350  0.00  0.00            
ATOM   2786  HW1 HOH X 913       2.732   8.816  10.416  0.00  0.00            
ATOM   2787  HW2 HOH X 913       1.990   9.583  11.490  0.00  0.00            
ATOM   2788  OW  HOH X 914      -6.145  13.747  17.626  0.00  0.00            
ATOM   2789  HW1 HOH X 914      -5.433  13.149  17.396  0.00  0.00            
ATOM   2790  HW2 HOH X 914      -6.174  14.374  16.904  0.00  0.00            
ATOM   2791  OW  HOH X 915      25.551  27.958  22.153  0.00  0.00            
ATOM   2792  HW1 HOH X 915      25.362  28.404  21.327  0.00  0.00            
ATOM   2793  HW2 HOH X 915      25.245  28.563  22.828  0.00  0.00            
ATOM   2794  OW  HOH X 916      18.553  15.811  18.238  0.00  0.00            
ATOM   2795  HW1 HOH X 916      18.278  16.482  18.863  0.00  0.00            
ATOM   2796  HW2 HOH X 916      17.742  15.370  17.986  0.00  0.00            
ATOM   2797  OW  HOH X 917      22.276  19.436  28.220  0.00  0.00            
ATOM   2798  HW1 HOH X 917      21.726  19.472  27.438  0.00  0.00            
ATOM   2799  HW2 HOH X 917      23.032  18.910  27.959  0.00  0.00            
ATOM   2800  OW  HOH X 918       1.027   2.025  13.049  0.00  0.00            
ATOM   2801  HW1 HOH X 918       1.322   1.296  12.504  0.00  0.00            
ATOM   2802  HW2 HOH X 918       1.066   2.788  12.472  0.00  0.00            
ATOM   2803  OW  HOH X 919       8.564  -6.561  15.903  0.00  0.00            
ATOM   2804  HW1 HOH X 919       8.318  -7.484  15.958  0.00  0.00            
ATOM   2805  HW2 HOH X 919       7.811  -6.090  16.260  0.00  0.00            
ATOM   2806  OW  HOH X 920      29.974  21.596  22.212  0.00  0.00            
ATOM   2807  HW1 HOH X 920      30.916  21.655  22.369  0.00  0.00            
ATOM   2808  HW2 HOH X 920      29.637  21.095  22.954  0.00  0.00            
ATOM   2809  OW  HOH X 921      25.764  14.598  38.296  0.00  0.00            
ATOM   2810  HW1 HOH X 921      25.841  13.698  37.979  0.00  0.00            
ATOM   2811  HW2 HOH X 921      24.902  14.635  38.710  0.00  0.00            
ATOM   2812  OW  HOH X 922      -0.901  -3.328  30.899  0.00  0.00            
ATOM   2813  HW1 HOH X 922      -1.215  -2.642  30.309  0.00  0.00            
ATOM   2814  HW2 HOH X 922      -1.666  -3.882  31.052  0.00  0.00            
ATOM   2815  OW  HOH X 923       7.503  -3.386  25.668  0.00  0.00            
ATOM   2816  HW1 HOH X 923       7.453  -3.367  26.624  0.00  0.00            
ATOM   2817  HW2 HOH X 923       7.682  -4.302  25.455  0.00  0.00            
ATOM   2818  OW  HOH X 924      10.234  30.386  23.512  0.00  0.00            
ATOM   2819  HW1 HOH X 924      10.642  31.232  23.695  0.00  0.00            
ATOM   2820  HW2 HOH X 924       9.339  30.475  23.839  0.00  0.00            
ATOM   2821  OW  HOH X 925      27.182  22.643  34.806  0.00  0.00            
ATOM   2822  HW1 HOH X 925      26.688  22.329  35.563  0.00  0.00            
ATOM   2823  HW2 HOH X 925      27.838  21.964  34.648  0.00  0.00            
ATOM   2824  OW  HOH X 926       5.263  -1.036   6.892  0.00  0.00            
ATOM   2825  HW1 HOH X 926       4.418  -0.681   6.616  0.00  0.00            
ATOM   2826  HW2 HOH X 926       5.223  -1.034   7.848  0.00  0.00            
ATOM   2827  OW  HOH X 927      18.883   1.213  16.016  0.00  0.00            
ATOM   2828  HW1 HOH X 927      19.439   1.991  15.994  0.00  0.00            
ATOM   2829  HW2 HOH X 927      17.993   1.555  16.099  0.00  0.00            
ATOM   2830  OW  HOH X 928      30.704  17.168  11.206  0.00  0.00            
ATOM   2831  HW1 HOH X 928      30.399  16.265  11.292  0.00  0.00            
ATOM   2832  HW2 HOH X 928      31.202  17.176  10.388  0.00  0.00            
ATOM   2833  OW  HOH X 929      12.788  14.763  18.754  0.00  0.00            
ATOM   2834  HW1 HOH X 929      12.071  15.396  18.717  0.00  0.00            
ATOM   2835  HW2 HOH X 929      12.746  14.304  17.915  0.00  0.00            
ATOM   2836  OW  HOH X 930      27.943   2.617  17.293  0.00  0.00            
ATOM   2837  HW1 HOH X 930      28.430   1.841  17.018  0.00  0.00            
ATOM   2838  HW2 HOH X 930      28.598   3.315  17.320  0.00  0.00            
ATOM   2839  OW  HOH X 931      23.203  28.420  15.690  0.00  0.00            
ATOM   2840  HW1 HOH X 931      23.528  29.098  16.282  0.00  0.00            
ATOM   2841  HW2 HOH X 931      23.934  28.248  15.097  0.00  0.00            
ATOM   2842  OW  HOH X 932      35.811   6.166  31.148  0.00  0.00            
ATOM   2843  HW1 HOH X 932      36.637   6.604  30.944  0.00  0.00            
ATOM   2844  HW2 HOH X 932      35.136   6.799  30.904  0.00  0.00            
ATOM   2845  OW  HOH X 933      16.801  -0.641  30.874  0.00  0.00            
ATOM   2846  HW1 HOH X 933      16.483  -0.764  29.979  0.00  0.00            
ATOM   2847  HW2 HOH X 933      17.740  -0.820  30.821  0.00  0.00            
ATOM   2848  OW  HOH X 934       8.561  24.747  23.666  0.00  0.00            
ATOM   2849  HW1 HOH X 934       7.721  24.482  24.039  0.00  0.00            
ATOM   2850  HW2 HOH X 934       8.855  23.984  23.168  0.00  0.00            
ATOM   2851  OW  HOH X 935      13.276   4.844  26.353  0.00  0.00            
ATOM   2852  HW1 HOH X 935      13.499   5.606  25.818  0.00  0.00            
ATOM   2853  HW2 HOH X 935      14.120   4.503  26.648  0.00  0.00            
ATOM   2854  OW  HOH X 936      22.245  14.464   3.030  0.00  0.00            
ATOM   2855  HW1 HOH X 936      22.276  15.403   2.843  0.00  0.00            
ATOM   2856  HW2 HOH X 936      23.161  14.212   3.146  0.00  0.00            
ATOM   2857  OW  HOH X 937      15.797  33.413  24.366  0.00  0.00            
ATOM   2858  HW1 HOH X 937      16.479  33.175  24.994  0.00  0.00            
ATOM   2859  HW2 HOH X 937      15.853  34.366  24.300  0.00  0.00            
ATOM   2860  OW  HOH X 938      11.625  17.931  31.472  0.00  0.00            
ATOM   2861  HW1 HOH X 938      12.329  17.679  32.070  0.00  0.00            
ATOM   2862  HW2 HOH X 938      10.827  17.610  31.891  0.00  0.00            
ATOM   2863  OW  HOH X 939      20.482  12.990  25.901  0.00  0.00            
ATOM   2864  HW1 HOH X 939      20.859  13.130  25.033  0.00  0.00            
ATOM   2865  HW2 HOH X 939      21.216  12.687  26.435  0.00  0.00            
ATOM   2866  OW  HOH X 940      20.659  19.741  22.446  0.00  0.00            
ATOM   2867  HW1 HOH X 940      20.105  18.972  22.581  0.00  0.00            
ATOM   2868  HW2 HOH X 940      20.135  20.474  22.769  0.00  0.00            
ATOM   2869  OW  HOH X 941       1.653  14.902  14.037  0.00  0.00            
ATOM   2870  HW1 HOH X 941       2.361  14.370  13.674  0.00  0.00            
ATOM   2871  HW2 HOH X 941       2.098  15.561  14.570  0.00  0.00            
ATOM   2872  OW  HOH X 942       0.144  11.201  25.727  0.00  0.00            
ATOM   2873  HW1 HOH X 942      -0.579  11.783  25.492  0.00  0.00            
ATOM   2874  HW2 HOH X 942       0.135  10.522  25.051  0.00  0.00            
ATOM   2875  OW  HOH X 943       1.789  11.704  11.801  0.00  0.00            
ATOM   2876  HW1 HOH X 943       2.553  11.866  12.355  0.00  0.00            
ATOM   2877  HW2 HOH X 943       2.065  11.977  10.926  0.00  0.00            
ATOM   2878  OW  HOH X 944      22.572  28.371  33.032  0.00  0.00            
ATOM   2879  HW1 HOH X 944      21.954  28.446  32.304  0.00  0.00            
ATOM   2880  HW2 HOH X 944      22.677  29.268  33.351  0.00  0.00            
ATOM   2881  OW  HOH X 945      19.967  27.147  19.428  0.00  0.00            
ATOM   2882  HW1 HOH X 945      20.350  26.937  18.576  0.00  0.00            
ATOM   2883  HW2 HOH X 945      20.716  27.381  19.976  0.00  0.00            
ATOM   2884  OW  HOH X 946       9.526  14.024  34.776  0.00  0.00            
ATOM   2885  HW1 HOH X 946       8.782  14.363  34.279  0.00  0.00            
ATOM   2886  HW2 HOH X 946       9.285  13.121  34.984  0.00  0.00            
ATOM   2887  OW  HOH X 947      22.607  14.675  24.596  0.00  0.00            
ATOM   2888  HW1 HOH X 947      22.193  15.427  25.019  0.00  0.00            
ATOM   2889  HW2 HOH X 947      23.083  14.235  25.300  0.00  0.00            
ATOM   2890  OW  HOH X 948       9.771  -4.370  22.487  0.00  0.00            
ATOM   2891  HW1 HOH X 948      10.171  -5.205  22.246  0.00  0.00            
ATOM   2892  HW2 HOH X 948       9.027  -4.610  23.039  0.00  0.00            
ATOM   2893  OW  HOH X 949      17.284  -4.048  13.796  0.00  0.00            
ATOM   2894  HW1 HOH X 949      16.967  -3.165  13.985  0.00  0.00            
ATOM   2895  HW2 HOH X 949      18.173  -3.919  13.465  0.00  0.00            
ATOM   2896  OW  HOH X 950      27.208  20.986  13.592  0.00  0.00            
ATOM   2897  HW1 HOH X 950      26.450  20.470  13.867  0.00  0.00            
ATOM   2898  HW2 HOH X 950      27.274  20.831  12.649  0.00  0.00            
ATOM   2899  OW  HOH X 951       7.880  16.885  13.062  0.00  0.00            
ATOM   2900  HW1 HOH X 951       7.980  17.776  12.726  0.00  0.00            
ATOM   2901  HW2 HOH X 951       8.638  16.413  12.719  0.00  0.00            
ATOM   2902  OW  HOH X 952       5.942  18.368  17.928  0.00  0.00            
ATOM   2903  HW1 HOH X 952       5.591  17.512  18.175  0.00  0.00            
ATOM   2904  HW2 HOH X 952       5.231  18.981  18.113  0.00  0.00            
ATOM   2905  OW  HOH X 953      -3.457   1.635  32.280  0.00  0.00            
ATOM   2906  HW1 HOH X 953      -2.816   0.992  32.582  0.00  0.00            
ATOM   2907  HW2 HOH X 953      -3.423   1.578  31.325  0.00  0.00            
ATOM   2908  OW  HOH X 954      28.493  12.762  18.505  0.00  0.00            
ATOM   2909  HW1 HOH X 954      28.805  13.657  18.375  0.00  0.00            
ATOM   2910  HW2 HOH X 954      28.275  12.716  19.436  0.00  0.00            
ATOM   2911  OW  HOH X 955      11.546   2.490  33.207  0.00  0.00            
ATOM   2912  HW1 HOH X 955      11.129   3.218  32.746  0.00  0.00            
ATOM   2913  HW2 HOH X 955      12.484   2.634  33.081  0.00  0.00            
ATOM   2914  OW  HOH X 956      33.099   9.135  28.114  0.00  0.00            
ATOM   2915  HW1 HOH X 956      32.474   9.843  28.270  0.00  0.00            
ATOM   2916  HW2 HOH X 956      32.908   8.837  27.225  0.00  0.00            
ATOM   2917  OW  HOH X 957      29.075  10.156  21.650  0.00  0.00            
ATOM   2918  HW1 HOH X 957      29.919   9.850  21.317  0.00  0.00            
ATOM   2919  HW2 HOH X 957      28.895   9.591  22.401  0.00  0.00            
ATOM   2920  OW  HOH X 958       4.275  15.908  25.252  0.00  0.00            
ATOM   2921  HW1 HOH X 958       4.627  16.716  24.878  0.00  0.00            
ATOM   2922  HW2 HOH X 958       4.225  16.082  26.192  0.00  0.00            
ATOM   2923  OW  HOH X 959      18.483  17.720  15.131  0.00  0.00            
ATOM   2924  HW1 HOH X 959      18.178  18.416  15.713  0.00  0.00            
ATOM   2925  HW2 HOH X 959      18.882  17.076  15.716  0.00  0.00            
ATOM   2926  OW  HOH X 960      18.255  22.217  27.458  0.00  0.00            
ATOM   2927  HW1 HOH X 960      17.481  22.753  27.632  0.00  0.00            
ATOM   2928  HW2 HOH X 960      18.989  22.827  27.522  0.00  0.00            
ATOM   2929  OW  HOH X 961       6.043  15.048  12.770  0.00  0.00            
ATOM   2930  HW1 HOH X 961       6.573  14.330  12.424  0.00  0.00            
ATOM   2931  HW2 HOH X 961       6.668  15.756  12.922  0.00  0.00            
ATOM   2932  OW  HOH X 962      21.877  25.274  33.465  0.00  0.00            
ATOM   2933  HW1 HOH X 962      22.090  26.202  33.371  0.00  0.00            
ATOM   2934  HW2 HOH X 962      22.417  24.977  34.197  0.00  0.00            
ATOM   2935  OW  HOH X 963      11.809  10.362  34.495  0.00  0.00            
ATOM   2936  HW1 HOH X 963      11.247   9.648  34.192  0.00  0.00            
ATOM   2937  HW2 HOH X 963      12.151  10.058  35.336  0.00  0.00            
ATOM   2938  OW  HOH X 964       9.704  14.610  21.065  0.00  0.00            
ATOM   2939  HW1 HOH X 964       9.559  14.643  20.119  0.00  0.00            
ATOM   2940  HW2 HOH X 964      10.401  13.963  21.178  0.00  0.00            
ATOM   2941  OW  HOH X 965      26.268  11.381  23.344  0.00  0.00            
ATOM   2942  HW1 HOH X 965      26.111  12.324  23.385  0.00  0.00            
ATOM   2943  HW2 HOH X 965      26.935  11.220  24.012  0.00  0.00            
ATOM   2944  OW  HOH X 966      18.534  26.932  23.151  0.00  0.00            
ATOM   2945  HW1 HOH X 966      18.518  26.054  23.532  0.00  0.00            
ATOM   2946  HW2 HOH X 966      18.357  26.793  22.221  0.00  0.00            
ATOM   2947  OW  HOH X 967      19.680  10.304  24.834  0.00  0.00            
ATOM   2948  HW1 HOH X 967      20.319  10.277  24.121  0.00  0.00            
ATOM   2949  HW2 HOH X 967      19.760  11.187  25.194  0.00  0.00            
ATOM   2950  OW  HOH X 968      -3.016   3.864  18.948  0.00  0.00            
ATOM   2951  HW1 HOH X 968      -3.618   3.143  18.765  0.00  0.00            
ATOM   2952  HW2 HOH X 968      -3.005   3.930  19.903  0.00  0.00            
ATOM   2953  OW  HOH X 969       2.324  10.087   7.540  0.00  0.00            
ATOM   2954  HW1 HOH X 969       1.456   9.878   7.884  0.00  0.00            
ATOM   2955  HW2 HOH X 969       2.536  10.937   7.925  0.00  0.00            
ATOM   2956  OW  HOH X 970      -0.663  17.908  21.854  0.00  0.00            
ATOM   2957  HW1 HOH X 970      -0.576  17.856  22.806  0.00  0.00            
ATOM   2958  HW2 HOH X 970      -1.006  17.051  21.598  0.00  0.00            
ATOM   2959  OW  HOH X 971      31.513  12.816  34.051  0.00  0.00            
ATOM   2960  HW1 HOH X 971      31.325  12.245  34.796  0.00  0.00            
ATOM   2961  HW2 HOH X 971      31.378  12.261  33.283  0.00  0.00            
ATOM   2962  OW  HOH X 972      17.031  19.123  39.359  0.00  0.00            
ATOM   2963  HW1 HOH X 972      17.343  19.116  40.264  0.00  0.00            
ATOM   2964  HW2 HOH X 972      17.407  19.918  38.981  0.00  0.00            
ATOM   2965  OW  HOH X 973      27.577  20.094  29.716  0.00  0.00            
ATOM   2966  HW1 HOH X 973      28.422  19.834  29.349  0.00  0.00            
ATOM   2967  HW2 HOH X 973      26.943  19.881  29.031  0.00  0.00            
ATOM   2968  OW  HOH X 974       0.513  13.384   7.355  0.00  0.00            
ATOM   2969  HW1 HOH X 974       0.654  12.804   8.104  0.00  0.00            
ATOM   2970  HW2 HOH X 974       1.301  13.927   7.320  0.00  0.00            
ATOM   2971  OW  HOH X 975      20.401   5.664  28.050  0.00  0.00            
ATOM   2972  HW1 HOH X 975      19.724   5.882  28.691  0.00  0.00            
ATOM   2973  HW2 HOH X 975      21.176   6.140  28.347  0.00  0.00            
ATOM   2974  OW  HOH X 976      38.821   4.623  25.259  0.00  0.00            
ATOM   2975  HW1 HOH X 976      38.961   5.526  24.975  0.00  0.00            
ATOM   2976  HW2 HOH X 976      39.670   4.199  25.137  0.00  0.00            
ATOM   2977  OW  HOH X 977      14.259  10.638  13.840  0.00  0.00            
ATOM   2978  HW1 HOH X 977      13.930  11.093  13.064  0.00  0.00            
ATOM   2979  HW2 HOH X 977      13.538  10.068  14.108  0.00  0.00            
ATOM   2980  OW  HOH X 978       6.061   5.403  10.227  0.00  0.00            
ATOM   2981  HW1 HOH X 978       5.598   5.822   9.501  0.00  0.00            
ATOM   2982  HW2 HOH X 978       6.889   5.110   9.845  0.00  0.00            
ATOM   2983  OW  HOH X 979      -8.773  16.047  16.246  0.00  0.00            
ATOM   2984  HW1 HOH X 979      -8.978  15.964  15.314  0.00  0.00            
ATOM   2985  HW2 HOH X 979      -7.832  16.218  16.270  0.00  0.00            
ATOM   2986  OW  HOH X 980       7.695  16.076  27.364  0.00  0.00            
ATOM   2987  HW1 HOH X 980       7.015  16.686  27.079  0.00  0.00            
ATOM   2988  HW2 HOH X 980       8.017  16.444  28.187  0.00  0.00            
ATOM   2989  OW  HOH X 981       0.949  -1.944  32.553  0.00  0.00            
ATOM   2990  HW1 HOH X 981       0.507  -1.419  33.220  0.00  0.00            
ATOM   2991  HW2 HOH X 981       0.253  -2.202  31.950  0.00  0.00            
ATOM   2992  OW  HOH X 982      17.094  -8.339  15.247  0.00  0.00            
ATOM   2993  HW1 HOH X 982      17.897  -8.828  15.071  0.00  0.00            
ATOM   2994  HW2 HOH X 982      16.675  -8.249  14.391  0.00  0.00            
ATOM   2995  OW  HOH X 983      21.984   2.129  31.610  0.00  0.00            
ATOM   2996  HW1 HOH X 983      22.353   1.458  31.035  0.00  0.00            
ATOM   2997  HW2 HOH X 983      22.494   2.060  32.417  0.00  0.00            
ATOM   2998  OW  HOH X 984      31.427  14.241  30.694  0.00  0.00            
ATOM   2999  HW1 HOH X 984      30.764  14.915  30.843  0.00  0.00            
ATOM   3000  HW2 HOH X 984      31.759  14.422  29.814  0.00  0.00            
ATOM   3001  OW  HOH X 985      17.176  19.306  35.642  0.00  0.00            
ATOM   3002  HW1 HOH X 985      16.336  18.933  35.908  0.00  0.00            
ATOM   3003  HW2 HOH X 985      17.676  18.561  35.311  0.00  0.00            
ATOM   3004  OW  HOH X 986       0.347   5.873  16.845  0.00  0.00            
ATOM   3005  HW1 HOH X 986      -0.122   5.250  16.290  0.00  0.00            
ATOM   3006  HW2 HOH X 986       1.190   5.453  17.017  0.00  0.00            
ATOM   3007  OW  HOH X 987      -0.663   1.091  25.733  0.00  0.00            
ATOM   3008  HW1 HOH X 987       0.148   1.475  25.400  0.00  0.00            
ATOM   3009  HW2 HOH X 987      -0.466   0.864  26.641  0.00  0.00            
ATOM   3010  OW  HOH X 988      23.222  12.488  26.703  0.00  0.00            
ATOM   3011  HW1 HOH X 988      23.521  13.281  27.148  0.00  0.00            
ATOM   3012  HW2 HOH X 988      23.986  11.911  26.703  0.00  0.00            
ATOM   3013  OW  HOH X 989       2.138  23.031  22.940  0.00  0.00            
ATOM   3014  HW1 HOH X 989       2.844  23.410  22.416  0.00  0.00            
ATOM   3015  HW2 HOH X 989       1.384  23.596  22.770  0.00  0.00            
ATOM   3016  OW  HOH X 990      14.041   2.530  32.978  0.00  0.00            
ATOM   3017  HW1 HOH X 990      14.108   2.560  32.024  0.00  0.00            
ATOM   3018  HW2 HOH X 990      14.710   1.900  33.246  0.00  0.00            
ATOM   3019  OW  HOH X 991      27.062  15.232  17.184  0.00  0.00            
ATOM   3020  HW1 HOH X 991      26.538  15.708  17.829  0.00  0.00            
ATOM   3021  HW2 HOH X 991      26.433  14.670  16.731  0.00  0.00            
ATOM   3022  OW  HOH X 992       3.609  13.272  13.145  0.00  0.00            
ATOM   3023  HW1 HOH X 992       3.978  12.605  13.724  0.00  0.00            
ATOM   3024  HW2 HOH X 992       4.369  13.757  12.823  0.00  0.00            
ATOM   3025  OW  HOH X 993       3.266   8.792  27.449  0.00  0.00            
ATOM   3026  HW1 HOH X 993       2.576   8.908  26.795  0.00  0.00            
ATOM   3027  HW2 HOH X 993       4.074   8.738  26.939  0.00  0.00            
ATOM   3028  OW  HOH X 994      11.589   3.922  17.348  0.00  0.00            
ATOM   3029  HW1 HOH X 994      12.506   3.890  17.621  0.00  0.00            
ATOM   3030  HW2 HOH X 994      11.219   3.094  17.653  0.00  0.00            
ATOM   3031  OW  HOH X 995       2.812  12.370  26.209  0.00  0.00            
ATOM   3032  HW1 HOH X 995       1.995  11.910  26.403  0.00  0.00            
ATOM   3033  HW2 HOH X 995       3.044  12.082  25.326  0.00  0.00            
ATOM   3034  OW  HOH X 996      -4.444   8.537  17.217  0.00  0.00            
ATOM   3035  HW1 HOH X 996      -5.320   8.358  16.875  0.00  0.00            
ATOM   3036  HW2 HOH X 996      -3.971   7.712  17.109  0.00  0.00            
ATOM   3037  OW  HOH X 997      15.115   7.490   2.163  0.00  0.00            
ATOM   3038  HW1 HOH X 997      15.518   7.979   2.880  0.00  0.00            
ATOM   3039  HW2 HOH X 997      15.780   6.854   1.902  0.00  0.00            
ATOM   3040  OW  HOH X 998      29.712  19.852  28.102  0.00  0.00            
ATOM   3041  HW1 HOH X 998      29.987  19.015  28.476  0.00  0.00            
ATOM   3042  HW2 HOH X 998      30.477  20.160  27.616  0.00  0.00            
ATOM   3043  OW  HOH X 999      10.271   0.496   3.982  0.00  0.00            
ATOM   3044  HW1 HOH X 999      10.927   0.324   3.307  0.00  0.00            
ATOM   3045  HW2 HOH X 999      10.775   0.815   4.731  0.00  0.00            
ATOM   3046  OW  HOH X1000       8.111  11.645  34.509  0.00  0.00            
ATOM   3047  HW1 HOH X1000       8.185  11.141  35.319  0.00  0.00            
ATOM   3048  HW2 HOH X1000       7.205  11.516  34.228  0.00  0.00            
ATOM   3049  OW  HOH X1001      16.437  20.535  30.502  0.00  0.00            
ATOM   3050  HW1 HOH X1001      15.700  20.527  29.892  0.00  0.00            
ATOM   3051  HW2 HOH X1001      16.215  19.873  31.157  0.00  0.00            
ATOM   3052  OW  HOH X1002       8.027   7.591  18.697  0.00  0.00            
ATOM   3053  HW1 HOH X1002       7.214   7.695  19.190  0.00  0.00            
ATOM   3054  HW2 HOH X1002       8.719   7.722  19.345  0.00  0.00            
ATOM   3055  OW  HOH X1003      20.295  17.194  20.528  0.00  0.00            
ATOM   3056  HW1 HOH X1003      19.764  17.454  21.280  0.00  0.00            
ATOM   3057  HW2 HOH X1003      19.821  17.535  19.770  0.00  0.00            
ATOM   3058  OW  HOH X1004      35.502  16.031  27.205  0.00  0.00            
ATOM   3059  HW1 HOH X1004      35.098  16.892  27.316  0.00  0.00            
ATOM   3060  HW2 HOH X1004      35.047  15.647  26.456  0.00  0.00            
ATOM   3061  OW  HOH X1005       5.195   2.436  35.943  0.00  0.00            
ATOM   3062  HW1 HOH X1005       4.284   2.172  35.813  0.00  0.00            
ATOM   3063  HW2 HOH X1005       5.144   3.183  36.540  0.00  0.00            
ATOM   3064  OW  HOH X1006       5.693   3.763  25.677  0.00  0.00            
ATOM   3065  HW1 HOH X1006       4.844   4.030  26.031  0.00  0.00            
ATOM   3066  HW2 HOH X1006       6.108   3.278  26.391  0.00  0.00            
ATOM   3067  OW  HOH X1007       0.837  13.459  16.432  0.00  0.00            
ATOM   3068  HW1 HOH X1007       1.105  13.800  15.579  0.00  0.00            
ATOM   3069  HW2 HOH X1007       0.836  12.508  16.322  0.00  0.00            
ATOM   3070  OW  HOH X1008       6.150  -1.049  30.946  0.00  0.00            
ATOM   3071  HW1 HOH X1008       6.271  -0.671  31.817  0.00  0.00            
ATOM   3072  HW2 HOH X1008       7.035  -1.260  30.650  0.00  0.00            
ATOM   3073  OW  HOH X1009      14.962  14.281   8.074  0.00  0.00            
ATOM   3074  HW1 HOH X1009      15.438  14.177   7.250  0.00  0.00            
ATOM   3075  HW2 HOH X1009      15.548  13.913   8.737  0.00  0.00            
ATOM   3076  OW  HOH X1010      21.427   7.289  10.679  0.00  0.00            
ATOM   3077  HW1 HOH X1010      21.251   6.560  11.273  0.00  0.00            
ATOM   3078  HW2 HOH X1010      21.578   8.038  11.255  0.00  0.00            
ATOM   3079  OW  HOH X1011       3.329   7.331  34.062  0.00  0.00            
ATOM   3080  HW1 HOH X1011       2.563   7.882  34.220  0.00  0.00            
ATOM   3081  HW2 HOH X1011       3.844   7.815  33.416  0.00  0.00            
ATOM   3082  OW  HOH X1012       9.308  -9.660  13.571  0.00  0.00            
ATOM   3083  HW1 HOH X1012       9.388  -8.933  12.954  0.00  0.00            
ATOM   3084  HW2 HOH X1012      10.027  -9.530  14.190  0.00  0.00            
ATOM   3085  OW  HOH X1013      13.687  26.695  30.791  0.00  0.00            
ATOM   3086  HW1 HOH X1013      12.828  27.005  30.503  0.00  0.00            
ATOM   3087  HW2 HOH X1013      14.251  26.807  30.026  0.00  0.00            
ATOM   3088  OW  HOH X1014      31.515   1.086  21.234  0.00  0.00            
ATOM   3089  HW1 HOH X1014      31.471   1.801  21.869  0.00  0.00            
ATOM   3090  HW2 HOH X1014      30.763   1.229  20.658  0.00  0.00            
ATOM   3091  OW  HOH X1015      20.214  28.617  31.177  0.00  0.00            
ATOM   3092  HW1 HOH X1015      19.809  27.842  31.567  0.00  0.00            
ATOM   3093  HW2 HOH X1015      20.107  29.301  31.838  0.00  0.00            
ATOM   3094  OW  HOH X1016      25.295  27.963  26.358  0.00  0.00            
ATOM   3095  HW1 HOH X1016      24.586  27.405  26.676  0.00  0.00            
ATOM   3096  HW2 HOH X1016      26.039  27.369  26.252  0.00  0.00            
ATOM   3097  OW  HOH X1017       7.260  21.919  25.494  0.00  0.00            
ATOM   3098  HW1 HOH X1017       6.919  22.681  25.025  0.00  0.00            
ATOM   3099  HW2 HOH X1017       7.482  22.251  26.363  0.00  0.00            
ATOM   3100  OW  HOH X1018      28.766  22.553  19.963  0.00  0.00            
ATOM   3101  HW1 HOH X1018      29.088  22.405  20.852  0.00  0.00            
ATOM   3102  HW2 HOH X1018      28.695  21.676  19.584  0.00  0.00            
ATOM   3103  OW  HOH X1019      20.083  17.772  33.985  0.00  0.00            
ATOM   3104  HW1 HOH X1019      19.980  17.479  34.890  0.00  0.00            
ATOM   3105  HW2 HOH X1019      21.009  18.000  33.910  0.00  0.00            
ATOM   3106  OW  HOH X1020       6.505   5.324  29.292  0.00  0.00            
ATOM   3107  HW1 HOH X1020       6.318   4.451  29.636  0.00  0.00            
ATOM   3108  HW2 HOH X1020       7.001   5.164  28.489  0.00  0.00            
ATOM   3109  OW  HOH X1021       5.905  12.097   6.024  0.00  0.00            
ATOM   3110  HW1 HOH X1021       6.295  12.968   5.958  0.00  0.00            
ATOM   3111  HW2 HOH X1021       6.455  11.635   6.657  0.00  0.00            
ATOM   3112  OW  HOH X1022      10.769   2.212   9.255  0.00  0.00            
ATOM   3113  HW1 HOH X1022      11.592   2.684   9.128  0.00  0.00            
ATOM   3114  HW2 HOH X1022      10.937   1.337   8.904  0.00  0.00            
ATOM   3115  OW  HOH X1023      14.443  -2.553  26.529  0.00  0.00            
ATOM   3116  HW1 HOH X1023      15.066  -3.234  26.277  0.00  0.00            
ATOM   3117  HW2 HOH X1023      13.759  -2.595  25.860  0.00  0.00            
ATOM   3118  OW  HOH X1024      10.726  10.830  22.154  0.00  0.00            
ATOM   3119  HW1 HOH X1024      11.551  11.249  21.910  0.00  0.00            
ATOM   3120  HW2 HOH X1024      10.051  11.377  21.753  0.00  0.00            
ATOM   3121  OW  HOH X1025      27.657   4.071  22.632  0.00  0.00            
ATOM   3122  HW1 HOH X1025      27.958   4.665  21.944  0.00  0.00            
ATOM   3123  HW2 HOH X1025      28.064   4.405  23.432  0.00  0.00            
ATOM   3124  OW  HOH X1026       9.288  -3.971  17.020  0.00  0.00            
ATOM   3125  HW1 HOH X1026       9.033  -4.006  17.942  0.00  0.00            
ATOM   3126  HW2 HOH X1026       8.616  -4.478  16.566  0.00  0.00            
ATOM   3127  OW  HOH X1027      25.379   4.475  24.781  0.00  0.00            
ATOM   3128  HW1 HOH X1027      24.508   4.079  24.772  0.00  0.00            
ATOM   3129  HW2 HOH X1027      25.749   4.262  23.924  0.00  0.00            
ATOM   3130  OW  HOH X1028      30.900  14.217  38.914  0.00  0.00            
ATOM   3131  HW1 HOH X1028      30.277  13.802  39.511  0.00  0.00            
ATOM   3132  HW2 HOH X1028      31.607  14.523  39.481  0.00  0.00            
ATOM   3133  OW  HOH X1029       7.749   7.895  32.107  0.00  0.00            
ATOM   3134  HW1 HOH X1029       7.547   7.245  32.780  0.00  0.00            
ATOM   3135  HW2 HOH X1029       7.139   7.702  31.395  0.00  0.00            
ATOM   3136  OW  HOH X1030       3.399  -3.169  31.293  0.00  0.00            
ATOM   3137  HW1 HOH X1030       3.835  -2.317  31.316  0.00  0.00            
ATOM   3138  HW2 HOH X1030       2.668  -3.081  31.904  0.00  0.00            
ATOM   3139  OW  HOH X1031       7.433   1.218   6.617  0.00  0.00            
ATOM   3140  HW1 HOH X1031       6.657   1.491   7.106  0.00  0.00            
ATOM   3141  HW2 HOH X1031       7.189   0.378   6.228  0.00  0.00            
ATOM   3142  OW  HOH X1032      21.972  20.304  31.480  0.00  0.00            
ATOM   3143  HW1 HOH X1032      21.751  20.344  32.410  0.00  0.00            
ATOM   3144  HW2 HOH X1032      21.210  20.675  31.035  0.00  0.00            
ATOM   3145  OW  HOH X1033      12.661  26.934  20.153  0.00  0.00            
ATOM   3146  HW1 HOH X1033      12.026  27.480  20.618  0.00  0.00            
ATOM   3147  HW2 HOH X1033      12.254  26.068  20.121  0.00  0.00            
ATOM   3148  OW  HOH X1034      24.833   6.755  35.827  0.00  0.00            
ATOM   3149  HW1 HOH X1034      25.045   6.026  36.410  0.00  0.00            
ATOM   3150  HW2 HOH X1034      25.670   7.194  35.677  0.00  0.00            
ATOM   3151  OW  HOH X1035       4.443  20.303  20.946  0.00  0.00            
ATOM   3152  HW1 HOH X1035       5.235  20.591  21.401  0.00  0.00            
ATOM   3153  HW2 HOH X1035       4.737  20.101  20.058  0.00  0.00            
ATOM   3154  OW  HOH X1036      19.211  18.445   6.728  0.00  0.00            
ATOM   3155  HW1 HOH X1036      19.109  17.938   7.533  0.00  0.00            
ATOM   3156  HW2 HOH X1036      20.158  18.510   6.603  0.00  0.00            
ATOM   3157  OW  HOH X1037      32.603  12.057  24.409  0.00  0.00            
ATOM   3158  HW1 HOH X1037      31.762  12.250  24.824  0.00  0.00            
ATOM   3159  HW2 HOH X1037      32.910  11.263  24.847  0.00  0.00            
ATOM   3160  OW  HOH X1038      20.251   8.496  16.875  0.00  0.00            
ATOM   3161  HW1 HOH X1038      19.811   9.347  16.863  0.00  0.00            
ATOM   3162  HW2 HOH X1038      21.168   8.698  16.687  0.00  0.00            
ATOM   3163  OW  HOH X1039      26.631  23.294  31.045  0.00  0.00            
ATOM   3164  HW1 HOH X1039      27.127  22.799  30.393  0.00  0.00            
ATOM   3165  HW2 HOH X1039      26.173  22.627  31.556  0.00  0.00            
ATOM   3166  OW  HOH X1040      13.537  20.782  20.815  0.00  0.00            
ATOM   3167  HW1 HOH X1040      12.751  20.512  20.340  0.00  0.00            
ATOM   3168  HW2 HOH X1040      13.281  20.756  21.737  0.00  0.00            
ATOM   3169  OW  HOH X1041      33.158   2.702  27.407  0.00  0.00            
ATOM   3170  HW1 HOH X1041      33.988   3.070  27.712  0.00  0.00            
ATOM   3171  HW2 HOH X1041      32.504   3.052  28.012  0.00  0.00            
ATOM   3172  OW  HOH X1042       9.354  -1.847  13.550  0.00  0.00            
ATOM   3173  HW1 HOH X1042      10.266  -1.718  13.811  0.00  0.00            
ATOM   3174  HW2 HOH X1042       9.127  -1.051  13.069  0.00  0.00            
ATOM   3175  OW  HOH X1043       7.645  -1.275   5.357  0.00  0.00            
ATOM   3176  HW1 HOH X1043       6.755  -1.410   5.684  0.00  0.00            
ATOM   3177  HW2 HOH X1043       7.704  -1.835   4.583  0.00  0.00            
ATOM   3178  OW  HOH X1044      21.911  34.719  28.631  0.00  0.00            
ATOM   3179  HW1 HOH X1044      22.015  35.073  27.748  0.00  0.00            
ATOM   3180  HW2 HOH X1044      21.756  35.488  29.180  0.00  0.00            
ATOM   3181  OW  HOH X1045      32.919   9.373  25.103  0.00  0.00            
ATOM   3182  HW1 HOH X1045      33.691   8.878  24.828  0.00  0.00            
ATOM   3183  HW2 HOH X1045      32.198   8.992  24.602  0.00  0.00            
ATOM   3184  OW  HOH X1046      16.906  24.262  22.442  0.00  0.00            
ATOM   3185  HW1 HOH X1046      17.717  24.159  22.939  0.00  0.00            
ATOM   3186  HW2 HOH X1046      17.146  24.820  21.703  0.00  0.00            
ATOM   3187  OW  HOH X1047      19.131  21.232  31.619  0.00  0.00            
ATOM   3188  HW1 HOH X1047      18.622  21.209  32.429  0.00  0.00            
ATOM   3189  HW2 HOH X1047      18.480  21.133  30.924  0.00  0.00            
ATOM   3190  OW  HOH X1048      24.871  24.230  12.275  0.00  0.00            
ATOM   3191  HW1 HOH X1048      25.778  24.099  12.553  0.00  0.00            
ATOM   3192  HW2 HOH X1048      24.524  23.345  12.166  0.00  0.00            
ATOM   3193  OW  HOH X1049      17.855  29.677  23.269  0.00  0.00            
ATOM   3194  HW1 HOH X1049      18.542  30.172  23.716  0.00  0.00            
ATOM   3195  HW2 HOH X1049      17.856  28.822  23.700  0.00  0.00            
ATOM   3196  OW  HOH X1050       4.991   2.988  19.246  0.00  0.00            
ATOM   3197  HW1 HOH X1050       5.166   2.152  18.813  0.00  0.00            
ATOM   3198  HW2 HOH X1050       4.058   2.957  19.459  0.00  0.00            
ATOM   3199  OW  HOH X1051      20.394  14.061  34.456  0.00  0.00            
ATOM   3200  HW1 HOH X1051      20.955  14.713  34.875  0.00  0.00            
ATOM   3201  HW2 HOH X1051      20.993  13.535  33.925  0.00  0.00            
ATOM   3202  OW  HOH X1052      20.835  15.664  28.394  0.00  0.00            
ATOM   3203  HW1 HOH X1052      20.398  16.419  28.787  0.00  0.00            
ATOM   3204  HW2 HOH X1052      21.502  16.044  27.822  0.00  0.00            
ATOM   3205  OW  HOH X1053       3.440   3.463  27.130  0.00  0.00            
ATOM   3206  HW1 HOH X1053       3.271   2.706  27.691  0.00  0.00            
ATOM   3207  HW2 HOH X1053       3.103   4.209  27.626  0.00  0.00            
ATOM   3208  OW  HOH X1054       9.925   3.919  28.293  0.00  0.00            
ATOM   3209  HW1 HOH X1054      10.592   3.793  27.618  0.00  0.00            
ATOM   3210  HW2 HOH X1054       9.563   3.044  28.439  0.00  0.00            
ATOM   3211  OW  HOH X1055       1.894   7.294   8.658  0.00  0.00            
ATOM   3212  HW1 HOH X1055       1.363   6.776   9.264  0.00  0.00            
ATOM   3213  HW2 HOH X1055       1.414   7.260   7.830  0.00  0.00            
ATOM   3214  OW  HOH X1056      30.987  11.826  26.562  0.00  0.00            
ATOM   3215  HW1 HOH X1056      31.496  12.393  27.141  0.00  0.00            
ATOM   3216  HW2 HOH X1056      30.093  11.880  26.899  0.00  0.00            
ATOM   3217  OW  HOH X1057      11.487  -9.569  17.084  0.00  0.00            
ATOM   3218  HW1 HOH X1057      11.502  -8.853  16.448  0.00  0.00            
ATOM   3219  HW2 HOH X1057      12.410  -9.766  17.244  0.00  0.00            
ATOM   3220  OW  HOH X1058       5.023  10.263   9.305  0.00  0.00            
ATOM   3221  HW1 HOH X1058       5.129  10.397  10.247  0.00  0.00            
ATOM   3222  HW2 HOH X1058       5.914  10.136   8.979  0.00  0.00            
ATOM   3223  OW  HOH X1059       1.135   3.712  31.270  0.00  0.00            
ATOM   3224  HW1 HOH X1059       2.003   4.105  31.371  0.00  0.00            
ATOM   3225  HW2 HOH X1059       0.763   4.148  30.504  0.00  0.00            
ATOM   3226  OW  HOH X1060      24.164  25.238  35.823  0.00  0.00            
ATOM   3227  HW1 HOH X1060      24.894  25.800  35.564  0.00  0.00            
ATOM   3228  HW2 HOH X1060      24.213  24.490  35.227  0.00  0.00            
ATOM   3229  OW  HOH X1061       2.076   8.410  16.305  0.00  0.00            
ATOM   3230  HW1 HOH X1061       1.375   8.839  15.815  0.00  0.00            
ATOM   3231  HW2 HOH X1061       2.529   7.871  15.656  0.00  0.00            
ATOM   3232  OW  HOH X1062      15.029  -1.661   9.775  0.00  0.00            
ATOM   3233  HW1 HOH X1062      14.235  -1.888  10.259  0.00  0.00            
ATOM   3234  HW2 HOH X1062      15.352  -2.497   9.440  0.00  0.00            
ATOM   3235  OW  HOH X1063      23.192  12.546  12.641  0.00  0.00            
ATOM   3236  HW1 HOH X1063      22.535  12.427  11.955  0.00  0.00            
ATOM   3237  HW2 HOH X1063      22.684  12.646  13.446  0.00  0.00            
ATOM   3238  OW  HOH X1064       3.089  -2.698  18.942  0.00  0.00            
ATOM   3239  HW1 HOH X1064       2.531  -2.192  18.351  0.00  0.00            
ATOM   3240  HW2 HOH X1064       3.678  -3.180  18.361  0.00  0.00            
ATOM   3241  OW  HOH X1065      24.978  18.380  17.768  0.00  0.00            
ATOM   3242  HW1 HOH X1065      25.469  17.692  18.218  0.00  0.00            
ATOM   3243  HW2 HOH X1065      24.105  18.347  18.158  0.00  0.00            
ATOM   3244  OW  HOH X1066      13.677   7.886  -0.275  0.00  0.00            
ATOM   3245  HW1 HOH X1066      13.103   8.639  -0.136  0.00  0.00            
ATOM   3246  HW2 HOH X1066      14.014   7.677   0.597  0.00  0.00            
ATOM   3247  OW  HOH X1067       4.062  22.678  16.531  0.00  0.00            
ATOM   3248  HW1 HOH X1067       4.425  23.563  16.559  0.00  0.00            
ATOM   3249  HW2 HOH X1067       3.126  22.808  16.377  0.00  0.00            
ATOM   3250  OW  HOH X1068       4.943  10.559  11.994  0.00  0.00            
ATOM   3251  HW1 HOH X1068       4.307   9.902  12.277  0.00  0.00            
ATOM   3252  HW2 HOH X1068       5.270  10.944  12.808  0.00  0.00            
ATOM   3253  OW  HOH X1069      20.555   8.497  21.900  0.00  0.00            
ATOM   3254  HW1 HOH X1069      21.203   8.205  21.260  0.00  0.00            
ATOM   3255  HW2 HOH X1069      20.891   8.186  22.741  0.00  0.00            
ATOM   3256  OW  HOH X1070      12.414  15.789  25.523  0.00  0.00            
ATOM   3257  HW1 HOH X1070      11.733  15.853  24.853  0.00  0.00            
ATOM   3258  HW2 HOH X1070      12.035  16.215  26.292  0.00  0.00            
ATOM   3259  OW  HOH X1071      12.911  -2.653  24.265  0.00  0.00            
ATOM   3260  HW1 HOH X1071      12.014  -2.854  24.001  0.00  0.00            
ATOM   3261  HW2 HOH X1071      13.449  -2.952  23.532  0.00  0.00            
ATOM   3262  OW  HOH X1072      13.364   4.918  34.252  0.00  0.00            
ATOM   3263  HW1 HOH X1072      13.786   4.097  33.999  0.00  0.00            
ATOM   3264  HW2 HOH X1072      14.041   5.400  34.728  0.00  0.00            
ATOM   3265  OW  HOH X1073      -2.213  10.576  18.723  0.00  0.00            
ATOM   3266  HW1 HOH X1073      -2.510  10.992  17.913  0.00  0.00            
ATOM   3267  HW2 HOH X1073      -1.735   9.800  18.432  0.00  0.00            
ATOM   3268  OW  HOH X1074      39.509   7.145  24.307  0.00  0.00            
ATOM   3269  HW1 HOH X1074      39.208   8.032  24.111  0.00  0.00            
ATOM   3270  HW2 HOH X1074      39.908   6.841  23.491  0.00  0.00            
ATOM   3271  OW  HOH X1075      29.729  19.150  12.959  0.00  0.00            
ATOM   3272  HW1 HOH X1075      28.961  18.632  13.199  0.00  0.00            
ATOM   3273  HW2 HOH X1075      30.246  18.570  12.401  0.00  0.00            
ATOM   3274  OW  HOH X1076      27.675  23.617  23.844  0.00  0.00            
ATOM   3275  HW1 HOH X1076      28.017  23.302  24.681  0.00  0.00            
ATOM   3276  HW2 HOH X1076      27.439  22.821  23.367  0.00  0.00            
ATOM   3277  OW  HOH X1077      12.831  12.814  25.680  0.00  0.00            
ATOM   3278  HW1 HOH X1077      13.051  12.269  24.925  0.00  0.00            
ATOM   3279  HW2 HOH X1077      12.856  13.710  25.343  0.00  0.00            
ATOM   3280  OW  HOH X1078      15.249  -9.328  20.471  0.00  0.00            
ATOM   3281  HW1 HOH X1078      16.122  -8.957  20.342  0.00  0.00            
ATOM   3282  HW2 HOH X1078      14.651  -8.646  20.164  0.00  0.00            
ATOM   3283  OW  HOH X1079      28.634  18.876  25.444  0.00  0.00            
ATOM   3284  HW1 HOH X1079      28.716  19.133  26.362  0.00  0.00            
ATOM   3285  HW2 HOH X1079      29.535  18.844  25.122  0.00  0.00            
ATOM   3286  OW  HOH X1080      19.168  33.659  23.863  0.00  0.00            
ATOM   3287  HW1 HOH X1080      18.801  34.087  23.089  0.00  0.00            
ATOM   3288  HW2 HOH X1080      19.720  34.328  24.268  0.00  0.00            
ATOM   3289  OW  HOH X1081      14.571   0.248  18.709  0.00  0.00            
ATOM   3290  HW1 HOH X1081      15.014  -0.429  19.219  0.00  0.00            
ATOM   3291  HW2 HOH X1081      15.266   0.652  18.190  0.00  0.00            
ATOM   3292  OW  HOH X1082       3.720   1.198   9.010  0.00  0.00            
ATOM   3293  HW1 HOH X1082       4.540   1.311   9.491  0.00  0.00            
ATOM   3294  HW2 HOH X1082       3.203   0.604   9.555  0.00  0.00            
ATOM   3295  OW  HOH X1083      -2.711   7.789  27.485  0.00  0.00            
ATOM   3296  HW1 HOH X1083      -3.364   7.348  28.029  0.00  0.00            
ATOM   3297  HW2 HOH X1083      -1.918   7.263  27.588  0.00  0.00            
ATOM   3298  OW  HOH X1084       5.152  15.798  18.624  0.00  0.00            
ATOM   3299  HW1 HOH X1084       4.397  15.265  18.877  0.00  0.00            
ATOM   3300  HW2 HOH X1084       5.635  15.250  18.005  0.00  0.00            
ATOM   3301  OW  HOH X1085      27.308   6.692  13.843  0.00  0.00            
ATOM   3302  HW1 HOH X1085      26.695   6.153  14.344  0.00  0.00            
ATOM   3303  HW2 HOH X1085      28.142   6.594  14.301  0.00  0.00            
ATOM   3304  OW  HOH X1086      21.904  16.682  26.115  0.00  0.00            
ATOM   3305  HW1 HOH X1086      21.072  16.778  25.652  0.00  0.00            
ATOM   3306  HW2 HOH X1086      22.419  17.442  25.844  0.00  0.00            
ATOM   3307  OW  HOH X1087       0.936  13.686  23.334  0.00  0.00            
ATOM   3308  HW1 HOH X1087       1.719  14.205  23.150  0.00  0.00            
ATOM   3309  HW2 HOH X1087       1.270  12.810  23.531  0.00  0.00            
ATOM   3310  OW  HOH X1088       2.825  14.407  19.115  0.00  0.00            
ATOM   3311  HW1 HOH X1088       2.355  14.626  18.311  0.00  0.00            
ATOM   3312  HW2 HOH X1088       3.145  13.516  18.971  0.00  0.00            
ATOM   3313  OW  HOH X1089      13.332  20.057  24.098  0.00  0.00            
ATOM   3314  HW1 HOH X1089      14.039  20.686  24.242  0.00  0.00            
ATOM   3315  HW2 HOH X1089      12.563  20.464  24.495  0.00  0.00            
ATOM   3316  OW  HOH X1090      26.832  11.672  32.545  0.00  0.00            
ATOM   3317  HW1 HOH X1090      26.220  12.406  32.593  0.00  0.00            
ATOM   3318  HW2 HOH X1090      27.620  12.041  32.145  0.00  0.00            
ATOM   3319  OW  HOH X1091      12.862  -2.694  29.219  0.00  0.00            
ATOM   3320  HW1 HOH X1091      12.836  -2.116  29.981  0.00  0.00            
ATOM   3321  HW2 HOH X1091      13.405  -2.228  28.583  0.00  0.00            
ATOM   3322  OW  HOH X1092       5.512  -8.572  22.445  0.00  0.00            
ATOM   3323  HW1 HOH X1092       5.817  -9.432  22.735  0.00  0.00            
ATOM   3324  HW2 HOH X1092       5.741  -8.538  21.516  0.00  0.00            
ATOM   3325  OW  HOH X1093      32.252   7.689  17.692  0.00  0.00            
ATOM   3326  HW1 HOH X1093      31.857   8.326  18.287  0.00  0.00            
ATOM   3327  HW2 HOH X1093      32.582   8.213  16.962  0.00  0.00            
ATOM   3328  OW  HOH X1094      23.884  15.012  27.722  0.00  0.00            
ATOM   3329  HW1 HOH X1094      24.347  15.069  28.558  0.00  0.00            
ATOM   3330  HW2 HOH X1094      23.888  15.907  27.383  0.00  0.00            
ATOM   3331  OW  HOH X1095      10.306 -13.140  19.132  0.00  0.00            
ATOM   3332  HW1 HOH X1095      11.145 -12.684  19.077  0.00  0.00            
ATOM   3333  HW2 HOH X1095       9.957 -13.110  18.241  0.00  0.00            
ATOM   3334  OW  HOH X1096      24.233  18.428  33.555  0.00  0.00            
ATOM   3335  HW1 HOH X1096      24.772  18.219  34.317  0.00  0.00            
ATOM   3336  HW2 HOH X1096      23.607  19.078  33.875  0.00  0.00            
ATOM   3337  OW  HOH X1097       9.538  13.243   5.580  0.00  0.00            
ATOM   3338  HW1 HOH X1097       9.780  12.322   5.479  0.00  0.00            
ATOM   3339  HW2 HOH X1097       8.764  13.349   5.027  0.00  0.00            
ATOM   3340  OW  HOH X1098      23.921  12.554  30.575  0.00  0.00            
ATOM   3341  HW1 HOH X1098      23.203  13.137  30.331  0.00  0.00            
ATOM   3342  HW2 HOH X1098      23.826  11.799  29.994  0.00  0.00            
ATOM   3343  OW  HOH X1099      23.659  -1.093  16.940  0.00  0.00            
ATOM   3344  HW1 HOH X1099      23.295  -0.243  16.694  0.00  0.00            
ATOM   3345  HW2 HOH X1099      24.486  -0.884  17.373  0.00  0.00            
ATOM   3346  OW  HOH X1100      16.054   8.923  15.025  0.00  0.00            
ATOM   3347  HW1 HOH X1100      16.128   8.298  14.303  0.00  0.00            
ATOM   3348  HW2 HOH X1100      15.448   9.591  14.704  0.00  0.00            
ATOM   3349  OW  HOH X1101      18.971  17.748  12.363  0.00  0.00            
ATOM   3350  HW1 HOH X1101      18.796  17.705  13.304  0.00  0.00            
ATOM   3351  HW2 HOH X1101      19.891  18.002  12.301  0.00  0.00            
ATOM   3352  OW  HOH X1102       9.577   1.232  28.485  0.00  0.00            
ATOM   3353  HW1 HOH X1102       9.577   0.779  27.641  0.00  0.00            
ATOM   3354  HW2 HOH X1102       9.478   0.534  29.132  0.00  0.00            
ATOM   3355  OW  HOH X1103      -4.345  11.362  16.965  0.00  0.00            
ATOM   3356  HW1 HOH X1103      -5.088  11.416  16.365  0.00  0.00            
ATOM   3357  HW2 HOH X1103      -4.273  10.431  17.175  0.00  0.00            
ATOM   3358  OW  HOH X1104      13.056 -12.923  18.414  0.00  0.00            
ATOM   3359  HW1 HOH X1104      13.789 -12.587  18.931  0.00  0.00            
ATOM   3360  HW2 HOH X1104      13.447 -13.169  17.575  0.00  0.00            
ATOM   3361  OW  HOH X1105      31.139  20.575  14.764  0.00  0.00            
ATOM   3362  HW1 HOH X1105      30.548  20.129  14.156  0.00  0.00            
ATOM   3363  HW2 HOH X1105      31.513  19.871  15.294  0.00  0.00            
ATOM   3364  OW  HOH X1106      21.529  -0.194  24.596  0.00  0.00            
ATOM   3365  HW1 HOH X1106      20.963  -0.347  25.353  0.00  0.00            
ATOM   3366  HW2 HOH X1106      22.403  -0.442  24.896  0.00  0.00            
ATOM   3367  OW  HOH X1107      -0.905  16.353  24.572  0.00  0.00            
ATOM   3368  HW1 HOH X1107      -0.035  16.740  24.476  0.00  0.00            
ATOM   3369  HW2 HOH X1107      -0.852  15.838  25.377  0.00  0.00            
ATOM   3370  OW  HOH X1108       0.317  -2.399  27.891  0.00  0.00            
ATOM   3371  HW1 HOH X1108      -0.431  -2.964  27.695  0.00  0.00            
ATOM   3372  HW2 HOH X1108       0.954  -2.980  28.306  0.00  0.00            
ATOM   3373  OW  HOH X1109      19.393  30.984  28.682  0.00  0.00            
ATOM   3374  HW1 HOH X1109      19.561  31.192  29.601  0.00  0.00            
ATOM   3375  HW2 HOH X1109      18.569  30.497  28.692  0.00  0.00            
ATOM   3376  OW  HOH X1110      24.635   3.830  17.709  0.00  0.00            
ATOM   3377  HW1 HOH X1110      24.810   4.771  17.695  0.00  0.00            
ATOM   3378  HW2 HOH X1110      25.201   3.491  18.403  0.00  0.00            
ATOM   3379  OW  HOH X1111      16.968  35.791  26.148  0.00  0.00            
ATOM   3380  HW1 HOH X1111      16.666  36.143  25.310  0.00  0.00            
ATOM   3381  HW2 HOH X1111      17.799  36.238  26.310  0.00  0.00            
ATOM   3382  OW  HOH X1112      15.439   5.088  19.794  0.00  0.00            
ATOM   3383  HW1 HOH X1112      15.715   5.210  20.702  0.00  0.00            
ATOM   3384  HW2 HOH X1112      14.739   5.729  19.668  0.00  0.00            
ATOM   3385  OW  HOH X1113       8.948 -12.364  21.391  0.00  0.00            
ATOM   3386  HW1 HOH X1113       9.384 -12.591  20.570  0.00  0.00            
ATOM   3387  HW2 HOH X1113       9.122 -13.107  21.968  0.00  0.00            
ATOM   3388  OW  HOH X1114       8.348   8.834  -0.012  0.00  0.00            
ATOM   3389  HW1 HOH X1114       8.382   9.786   0.086  0.00  0.00            
ATOM   3390  HW2 HOH X1114       7.756   8.542   0.681  0.00  0.00            
ATOM   3391  OW  HOH X1115      11.224   0.204  20.505  0.00  0.00            
ATOM   3392  HW1 HOH X1115      10.659  -0.551  20.671  0.00  0.00            
ATOM   3393  HW2 HOH X1115      11.981  -0.160  20.046  0.00  0.00            
ATOM   3394  OW  HOH X1116      17.417   8.217  38.537  0.00  0.00            
ATOM   3395  HW1 HOH X1116      16.789   7.849  39.159  0.00  0.00            
ATOM   3396  HW2 HOH X1116      17.775   7.457  38.079  0.00  0.00            
ATOM   3397  OW  HOH X1117      12.025   8.936  40.436  0.00  0.00            
ATOM   3398  HW1 HOH X1117      11.581   9.192  39.628  0.00  0.00            
ATOM   3399  HW2 HOH X1117      12.250   8.015  40.304  0.00  0.00            
ATOM   3400  OW  HOH X1118      28.945  28.675  15.603  0.00  0.00            
ATOM   3401  HW1 HOH X1118      29.167  28.814  14.682  0.00  0.00            
ATOM   3402  HW2 HOH X1118      28.121  28.188  15.580  0.00  0.00            
ATOM   3403  OW  HOH X1119      37.084  18.937  13.707  0.00  0.00            
ATOM   3404  HW1 HOH X1119      37.546  19.637  14.169  0.00  0.00            
ATOM   3405  HW2 HOH X1119      36.157  19.150  13.815  0.00  0.00            
ATOM   3406  OW  HOH X1120       9.312  -5.101   4.599  0.00  0.00            
ATOM   3407  HW1 HOH X1120       9.084  -4.950   3.681  0.00  0.00            
ATOM   3408  HW2 HOH X1120      10.262  -5.220   4.593  0.00  0.00            
ATOM   3409  OW  HOH X1121      14.291  17.928  22.566  0.00  0.00            
ATOM   3410  HW1 HOH X1121      13.523  17.681  22.051  0.00  0.00            
ATOM   3411  HW2 HOH X1121      13.971  18.603  23.165  0.00  0.00            
ATOM   3412  OW  HOH X1122      18.579  25.227  16.871  0.00  0.00            
ATOM   3413  HW1 HOH X1122      18.937  24.993  16.015  0.00  0.00            
ATOM   3414  HW2 HOH X1122      19.348  25.376  17.421  0.00  0.00            
ATOM   3415  OW  HOH X1123      14.194  11.298  39.938  0.00  0.00            
ATOM   3416  HW1 HOH X1123      15.097  11.437  39.652  0.00  0.00            
ATOM   3417  HW2 HOH X1123      14.174  10.392  40.243  0.00  0.00            
ATOM   3418  OW  HOH X1124      30.173  10.496  12.737  0.00  0.00            
ATOM   3419  HW1 HOH X1124      30.317  11.082  11.994  0.00  0.00            
ATOM   3420  HW2 HOH X1124      30.382   9.625  12.399  0.00  0.00            
ATOM   3421  OW  HOH X1125      26.185  21.916  37.577  0.00  0.00            
ATOM   3422  HW1 HOH X1125      25.759  21.060  37.541  0.00  0.00            
ATOM   3423  HW2 HOH X1125      27.122  21.718  37.577  0.00  0.00            
ATOM   3424  OW  HOH X1126       9.598  17.426  21.150  0.00  0.00            
ATOM   3425  HW1 HOH X1126       8.976  16.728  20.943  0.00  0.00            
ATOM   3426  HW2 HOH X1126       9.102  18.235  21.026  0.00  0.00            
ATOM   3427  OW  HOH X1127       7.866  19.399  19.983  0.00  0.00            
ATOM   3428  HW1 HOH X1127       7.529  18.924  19.223  0.00  0.00            
ATOM   3429  HW2 HOH X1127       8.075  20.271  19.648  0.00  0.00            
ATOM   3430  OW  HOH X1128      16.349   1.938  28.545  0.00  0.00            
ATOM   3431  HW1 HOH X1128      16.872   2.075  27.755  0.00  0.00            
ATOM   3432  HW2 HOH X1128      16.161   1.000  28.549  0.00  0.00            
ATOM   3433  OW  HOH X1129      21.316  32.338  31.356  0.00  0.00            
ATOM   3434  HW1 HOH X1129      20.485  32.710  31.651  0.00  0.00            
ATOM   3435  HW2 HOH X1129      21.941  33.060  31.430  0.00  0.00            
ATOM   3436  OW  HOH X1130      15.169   9.951  30.066  0.00  0.00            
ATOM   3437  HW1 HOH X1130      15.410   9.341  29.369  0.00  0.00            
ATOM   3438  HW2 HOH X1130      15.986  10.399  30.285  0.00  0.00            
ATOM   3439  OW  HOH X1131      32.582  -0.001  26.616  0.00  0.00            
ATOM   3440  HW1 HOH X1131      32.851   0.320  25.755  0.00  0.00            
ATOM   3441  HW2 HOH X1131      32.680   0.755  27.195  0.00  0.00            
ATOM   3442  OW  HOH X1132      34.348  15.909  30.237  0.00  0.00            
ATOM   3443  HW1 HOH X1132      33.817  16.519  29.725  0.00  0.00            
ATOM   3444  HW2 HOH X1132      34.688  15.288  29.593  0.00  0.00            
ATOM   3445  OW  HOH X1133      16.245   8.759  27.934  0.00  0.00            
ATOM   3446  HW1 HOH X1133      17.087   8.816  27.482  0.00  0.00            
ATOM   3447  HW2 HOH X1133      15.593   8.850  27.239  0.00  0.00            
ATOM   3448  OW  HOH X1134      14.539  20.824  28.550  0.00  0.00            
ATOM   3449  HW1 HOH X1134      14.680  20.996  27.619  0.00  0.00            
ATOM   3450  HW2 HOH X1134      14.380  19.881  28.599  0.00  0.00            
ATOM   3451  OW  HOH X1135      30.809  14.589  21.328  0.00  0.00            
ATOM   3452  HW1 HOH X1135      30.986  13.657  21.207  0.00  0.00            
ATOM   3453  HW2 HOH X1135      30.736  14.699  22.277  0.00  0.00            
ATOM   3454  OW  HOH X1136      13.521  -7.268  20.036  0.00  0.00            
ATOM   3455  HW1 HOH X1136      14.054  -6.736  19.444  0.00  0.00            
ATOM   3456  HW2 HOH X1136      12.621  -7.123  19.744  0.00  0.00            
ATOM   3457  OW  HOH X1137      15.766  23.254  31.520  0.00  0.00            
ATOM   3458  HW1 HOH X1137      15.219  23.308  30.737  0.00  0.00            
ATOM   3459  HW2 HOH X1137      15.777  22.323  31.742  0.00  0.00            
ATOM   3460  OW  HOH X1138      20.462  19.209  25.509  0.00  0.00            
ATOM   3461  HW1 HOH X1138      19.813  18.910  26.146  0.00  0.00            
ATOM   3462  HW2 HOH X1138      20.468  18.530  24.836  0.00  0.00            
ATOM   3463  OW  HOH X1139      24.303  12.090  40.049  0.00  0.00            
ATOM   3464  HW1 HOH X1139      24.196  11.139  40.019  0.00  0.00            
ATOM   3465  HW2 HOH X1139      24.576  12.329  39.163  0.00  0.00            
ATOM   3466  OW  HOH X1140       9.831  14.644   9.201  0.00  0.00            
ATOM   3467  HW1 HOH X1140      10.609  14.554   8.651  0.00  0.00            
ATOM   3468  HW2 HOH X1140      10.049  14.168  10.003  0.00  0.00            
ATOM   3469  OW  HOH X1141       8.223  25.228  20.193  0.00  0.00            
ATOM   3470  HW1 HOH X1141       8.193  24.280  20.070  0.00  0.00            
ATOM   3471  HW2 HOH X1141       8.965  25.371  20.781  0.00  0.00            
ATOM   3472  OW  HOH X1142       4.956   5.641   6.323  0.00  0.00            
ATOM   3473  HW1 HOH X1142       4.509   6.468   6.502  0.00  0.00            
ATOM   3474  HW2 HOH X1142       5.843   5.770   6.659  0.00  0.00            
ATOM   3475  OW  HOH X1143      12.689   5.525  13.334  0.00  0.00            
ATOM   3476  HW1 HOH X1143      12.642   6.259  13.946  0.00  0.00            
ATOM   3477  HW2 HOH X1143      12.623   4.746  13.888  0.00  0.00            
ATOM   3478  OW  HOH X1144      22.169  -2.440  18.961  0.00  0.00            
ATOM   3479  HW1 HOH X1144      21.810  -3.168  18.454  0.00  0.00            
ATOM   3480  HW2 HOH X1144      22.621  -1.897  18.316  0.00  0.00            
ATOM   3481  OW  HOH X1145      12.080  -2.352   5.183  0.00  0.00            
ATOM   3482  HW1 HOH X1145      11.947  -2.539   4.253  0.00  0.00            
ATOM   3483  HW2 HOH X1145      12.739  -1.658   5.196  0.00  0.00            
ATOM   3484  OW  HOH X1146      30.279  16.527   7.540  0.00  0.00            
ATOM   3485  HW1 HOH X1146      31.035  16.697   8.102  0.00  0.00            
ATOM   3486  HW2 HOH X1146      30.447  17.040   6.750  0.00  0.00            
ATOM   3487  OW  HOH X1147       9.576  18.819  15.805  0.00  0.00            
ATOM   3488  HW1 HOH X1147       9.100  19.649  15.822  0.00  0.00            
ATOM   3489  HW2 HOH X1147       9.305  18.404  14.986  0.00  0.00            
ATOM   3490  OW  HOH X1148      30.698  15.321  24.312  0.00  0.00            
ATOM   3491  HW1 HOH X1148      31.122  15.336  25.170  0.00  0.00            
ATOM   3492  HW2 HOH X1148      29.926  15.877  24.417  0.00  0.00            
ATOM   3493  OW  HOH X1149       3.801  -0.937  34.511  0.00  0.00            
ATOM   3494  HW1 HOH X1149       3.988  -0.169  35.052  0.00  0.00            
ATOM   3495  HW2 HOH X1149       3.556  -0.576  33.659  0.00  0.00            
ATOM   3496  OW  HOH X1150      31.997  11.857  21.781  0.00  0.00            
ATOM   3497  HW1 HOH X1150      32.079  10.941  21.516  0.00  0.00            
ATOM   3498  HW2 HOH X1150      32.119  11.844  22.731  0.00  0.00            
ATOM   3499  OW  HOH X1151      33.209  15.862  19.227  0.00  0.00            
ATOM   3500  HW1 HOH X1151      32.467  16.239  19.700  0.00  0.00            
ATOM   3501  HW2 HOH X1151      33.724  16.617  18.944  0.00  0.00            
ATOM   3502  OW  HOH X1152      16.977  14.855  40.293  0.00  0.00            
ATOM   3503  HW1 HOH X1152      17.593  15.025  41.005  0.00  0.00            
ATOM   3504  HW2 HOH X1152      16.125  15.114  40.645  0.00  0.00            
ATOM   3505  OW  HOH X1153      26.217  19.609  21.392  0.00  0.00            
ATOM   3506  HW1 HOH X1153      26.656  20.065  20.674  0.00  0.00            
ATOM   3507  HW2 HOH X1153      25.324  19.953  21.385  0.00  0.00            
ATOM   3508  OW  HOH X1154      17.339   4.522  10.115  0.00  0.00            
ATOM   3509  HW1 HOH X1154      18.274   4.648   9.950  0.00  0.00            
ATOM   3510  HW2 HOH X1154      16.968   5.404  10.080  0.00  0.00            
ATOM   3511  OW  HOH X1155      22.925   4.512  30.639  0.00  0.00            
ATOM   3512  HW1 HOH X1155      22.495   3.681  30.843  0.00  0.00            
ATOM   3513  HW2 HOH X1155      23.788   4.443  31.048  0.00  0.00            
ATOM   3514  OW  HOH X1156      18.007  -6.230  21.035  0.00  0.00            
ATOM   3515  HW1 HOH X1156      18.303  -5.403  20.653  0.00  0.00            
ATOM   3516  HW2 HOH X1156      17.641  -6.718  20.298  0.00  0.00            
ATOM   3517  OW  HOH X1157      20.815  -2.747  23.366  0.00  0.00            
ATOM   3518  HW1 HOH X1157      20.845  -2.000  23.963  0.00  0.00            
ATOM   3519  HW2 HOH X1157      21.653  -2.719  22.904  0.00  0.00            
ATOM   3520  OW  HOH X1158      38.951   9.989  24.811  0.00  0.00            
ATOM   3521  HW1 HOH X1158      39.366  10.573  25.445  0.00  0.00            
ATOM   3522  HW2 HOH X1158      39.158  10.374  23.959  0.00  0.00            
ATOM   3523  OW  HOH X1159      40.063  14.214  18.513  0.00  0.00            
ATOM   3524  HW1 HOH X1159      40.785  14.065  19.124  0.00  0.00            
ATOM   3525  HW2 HOH X1159      40.348  14.958  17.982  0.00  0.00            
ATOM   3526  OW  HOH X1160      12.330  21.476  14.038  0.00  0.00            
ATOM   3527  HW1 HOH X1160      12.373  22.216  14.643  0.00  0.00            
ATOM   3528  HW2 HOH X1160      12.465  20.706  14.589  0.00  0.00            
ATOM   3529  OW  HOH X1161      -4.644  14.180   9.133  0.00  0.00            
ATOM   3530  HW1 HOH X1161      -3.727  13.934   9.255  0.00  0.00            
ATOM   3531  HW2 HOH X1161      -5.139  13.428   9.460  0.00  0.00            
ATOM   3532  OW  HOH X1162      10.572  -6.794  21.525  0.00  0.00            
ATOM   3533  HW1 HOH X1162       9.948  -7.382  21.950  0.00  0.00            
ATOM   3534  HW2 HOH X1162      10.798  -7.236  20.706  0.00  0.00            
ATOM   3535  OW  HOH X1163      29.351   1.289  19.664  0.00  0.00            
ATOM   3536  HW1 HOH X1163      28.646   1.686  19.153  0.00  0.00            
ATOM   3537  HW2 HOH X1163      29.228   0.347  19.551  0.00  0.00            
ATOM   3538  OW  HOH X1164       3.303   1.609  29.081  0.00  0.00            
ATOM   3539  HW1 HOH X1164       4.006   1.762  29.711  0.00  0.00            
ATOM   3540  HW2 HOH X1164       2.511   1.546  29.615  0.00  0.00            
ATOM   3541  OW  HOH X1165      29.579   9.235  26.634  0.00  0.00            
ATOM   3542  HW1 HOH X1165      29.391   8.968  27.534  0.00  0.00            
ATOM   3543  HW2 HOH X1165      30.440   9.650  26.682  0.00  0.00            
ATOM   3544  OW  HOH X1166      20.105   8.449  28.547  0.00  0.00            
ATOM   3545  HW1 HOH X1166      19.393   7.882  28.845  0.00  0.00            
ATOM   3546  HW2 HOH X1166      20.841   8.229  29.117  0.00  0.00            
ATOM   3547  OW  HOH X1167       6.855  13.227  27.400  0.00  0.00            
ATOM   3548  HW1 HOH X1167       6.680  12.756  26.585  0.00  0.00            
ATOM   3549  HW2 HOH X1167       7.384  13.979  27.134  0.00  0.00            
ATOM   3550  OW  HOH X1168       9.319   5.553  16.362  0.00  0.00            
ATOM   3551  HW1 HOH X1168      10.129   5.049  16.441  0.00  0.00            
ATOM   3552  HW2 HOH X1168       8.807   5.307  17.133  0.00  0.00            
ATOM   3553  OW  HOH X1169       4.581   7.225   8.682  0.00  0.00            
ATOM   3554  HW1 HOH X1169       4.982   8.088   8.781  0.00  0.00            
ATOM   3555  HW2 HOH X1169       3.647   7.406   8.570  0.00  0.00            
ATOM   3556  OW  HOH X1170      14.647  -5.776  18.083  0.00  0.00            
ATOM   3557  HW1 HOH X1170      15.331  -5.127  17.917  0.00  0.00            
ATOM   3558  HW2 HOH X1170      14.421  -6.112  17.216  0.00  0.00            
ATOM   3559  OW  HOH X1171      33.939  17.477  24.855  0.00  0.00            
ATOM   3560  HW1 HOH X1171      34.570  17.438  24.137  0.00  0.00            
ATOM   3561  HW2 HOH X1171      33.681  16.566  24.996  0.00  0.00            
ATOM   3562  OW  HOH X1172      16.560   4.947  27.670  0.00  0.00            
ATOM   3563  HW1 HOH X1172      16.274   5.630  28.277  0.00  0.00            
ATOM   3564  HW2 HOH X1172      16.357   4.126  28.118  0.00  0.00            
ATOM   3565  OW  HOH X1173       5.185  -0.688  22.712  0.00  0.00            
ATOM   3566  HW1 HOH X1173       4.828  -1.098  23.499  0.00  0.00            
ATOM   3567  HW2 HOH X1173       4.464  -0.706  22.083  0.00  0.00            
ATOM   3568  OW  HOH X1174      25.748  20.945  26.785  0.00  0.00            
ATOM   3569  HW1 HOH X1174      25.112  21.431  26.260  0.00  0.00            
ATOM   3570  HW2 HOH X1174      26.577  21.403  26.642  0.00  0.00            
ATOM   3571  OW  HOH X1175      17.941   2.394  30.621  0.00  0.00            
ATOM   3572  HW1 HOH X1175      18.230   1.546  30.958  0.00  0.00            
ATOM   3573  HW2 HOH X1175      17.280   2.177  29.963  0.00  0.00            
ATOM   3574  OW  HOH X1176      25.786   5.295  20.378  0.00  0.00            
ATOM   3575  HW1 HOH X1176      26.371   5.073  21.102  0.00  0.00            
ATOM   3576  HW2 HOH X1176      24.973   4.831  20.576  0.00  0.00            
ATOM   3577  OW  HOH X1177      10.924   7.740  24.644  0.00  0.00            
ATOM   3578  HW1 HOH X1177      11.203   7.446  25.511  0.00  0.00            
ATOM   3579  HW2 HOH X1177      11.722   7.724  24.116  0.00  0.00            
ATOM   3580  OW  HOH X1178       8.601  -1.396   2.620  0.00  0.00            
ATOM   3581  HW1 HOH X1178       9.022  -0.891   3.315  0.00  0.00            
ATOM   3582  HW2 HOH X1178       9.090  -1.170   1.829  0.00  0.00            
ATOM   3583  OW  HOH X1179      11.764  12.524  28.441  0.00  0.00            
ATOM   3584  HW1 HOH X1179      11.012  12.291  27.896  0.00  0.00            
ATOM   3585  HW2 HOH X1179      12.379  12.938  27.836  0.00  0.00            
ATOM   3586  OW  HOH X1180      -7.960  12.797  19.345  0.00  0.00            
ATOM   3587  HW1 HOH X1180      -8.399  13.620  19.127  0.00  0.00            
ATOM   3588  HW2 HOH X1180      -7.197  12.772  18.768  0.00  0.00            
ATOM   3589  OW  HOH X1181      19.414  20.932  15.707  0.00  0.00            
ATOM   3590  HW1 HOH X1181      20.171  20.503  15.310  0.00  0.00            
ATOM   3591  HW2 HOH X1181      19.442  21.828  15.372  0.00  0.00            
ATOM   3592  OW  HOH X1182      -3.073   8.921  24.025  0.00  0.00            
ATOM   3593  HW1 HOH X1182      -2.437   9.587  23.764  0.00  0.00            
ATOM   3594  HW2 HOH X1182      -2.540   8.169  24.284  0.00  0.00            
ATOM   3595  OW  HOH X1183      13.828   7.125  25.093  0.00  0.00            
ATOM   3596  HW1 HOH X1183      13.620   6.672  24.276  0.00  0.00            
ATOM   3597  HW2 HOH X1183      14.693   7.506  24.942  0.00  0.00            
ATOM   3598  OW  HOH X1184      16.780  12.076  39.524  0.00  0.00            
ATOM   3599  HW1 HOH X1184      17.317  11.815  40.271  0.00  0.00            
ATOM   3600  HW2 HOH X1184      16.665  13.021  39.629  0.00  0.00            
ATOM   3601  OW  HOH X1185      17.007   5.246  25.001  0.00  0.00            
ATOM   3602  HW1 HOH X1185      16.976   5.559  25.906  0.00  0.00            
ATOM   3603  HW2 HOH X1185      17.821   5.608  24.650  0.00  0.00            
ATOM   3604  OW  HOH X1186      30.210   4.555  17.349  0.00  0.00            
ATOM   3605  HW1 HOH X1186      30.984   4.688  17.897  0.00  0.00            
ATOM   3606  HW2 HOH X1186      29.623   5.273  17.584  0.00  0.00            
ATOM   3607  OW  HOH X1187      19.947  -3.905  17.177  0.00  0.00            
ATOM   3608  HW1 HOH X1187      20.029  -3.072  16.713  0.00  0.00            
ATOM   3609  HW2 HOH X1187      19.525  -4.490  16.548  0.00  0.00            
ATOM   3610  OW  HOH X1188       5.743  17.282  29.094  0.00  0.00            
ATOM   3611  HW1 HOH X1188       5.314  16.623  28.548  0.00  0.00            
ATOM   3612  HW2 HOH X1188       5.558  18.113  28.656  0.00  0.00            
ATOM   3613  OW  HOH X1189      25.688  15.457  30.393  0.00  0.00            
ATOM   3614  HW1 HOH X1189      24.978  15.683  30.994  0.00  0.00            
ATOM   3615  HW2 HOH X1189      26.433  15.267  30.963  0.00  0.00            
ATOM   3616  OW  HOH X1190       7.380  -6.139  23.914  0.00  0.00            
ATOM   3617  HW1 HOH X1190       7.108  -6.161  22.996  0.00  0.00            
ATOM   3618  HW2 HOH X1190       7.272  -7.040  24.218  0.00  0.00            
ATOM   3619  OW  HOH X1191      18.164   2.156  25.948  0.00  0.00            
ATOM   3620  HW1 HOH X1191      18.257   2.888  25.338  0.00  0.00            
ATOM   3621  HW2 HOH X1191      18.926   2.224  26.523  0.00  0.00            
ATOM   3622  OW  HOH X1192      28.517  -0.797  22.400  0.00  0.00            
ATOM   3623  HW1 HOH X1192      28.653  -1.356  21.634  0.00  0.00            
ATOM   3624  HW2 HOH X1192      28.235   0.042  22.037  0.00  0.00            
ATOM   3625  OW  HOH X1193      26.722  25.219  27.384  0.00  0.00            
ATOM   3626  HW1 HOH X1193      26.304  24.916  28.190  0.00  0.00            
ATOM   3627  HW2 HOH X1193      26.051  25.113  26.710  0.00  0.00            
ATOM   3628  OW  HOH X1194      16.190   9.066   7.434  0.00  0.00            
ATOM   3629  HW1 HOH X1194      15.544   8.394   7.650  0.00  0.00            
ATOM   3630  HW2 HOH X1194      16.145   9.686   8.162  0.00  0.00            
ATOM   3631  OW  HOH X1195       6.284   5.179  20.700  0.00  0.00            
ATOM   3632  HW1 HOH X1195       6.470   5.296  21.631  0.00  0.00            
ATOM   3633  HW2 HOH X1195       5.922   4.295  20.637  0.00  0.00            
END
