# Supplementary figures and images for: Evolution of cation binding in the active sites of P-loop nucleoside triphosphatases in relation to the basic catalytic mechanism
Source: eLife journal article supplement (doi:10.7554/elife.37373), 2018-12-11

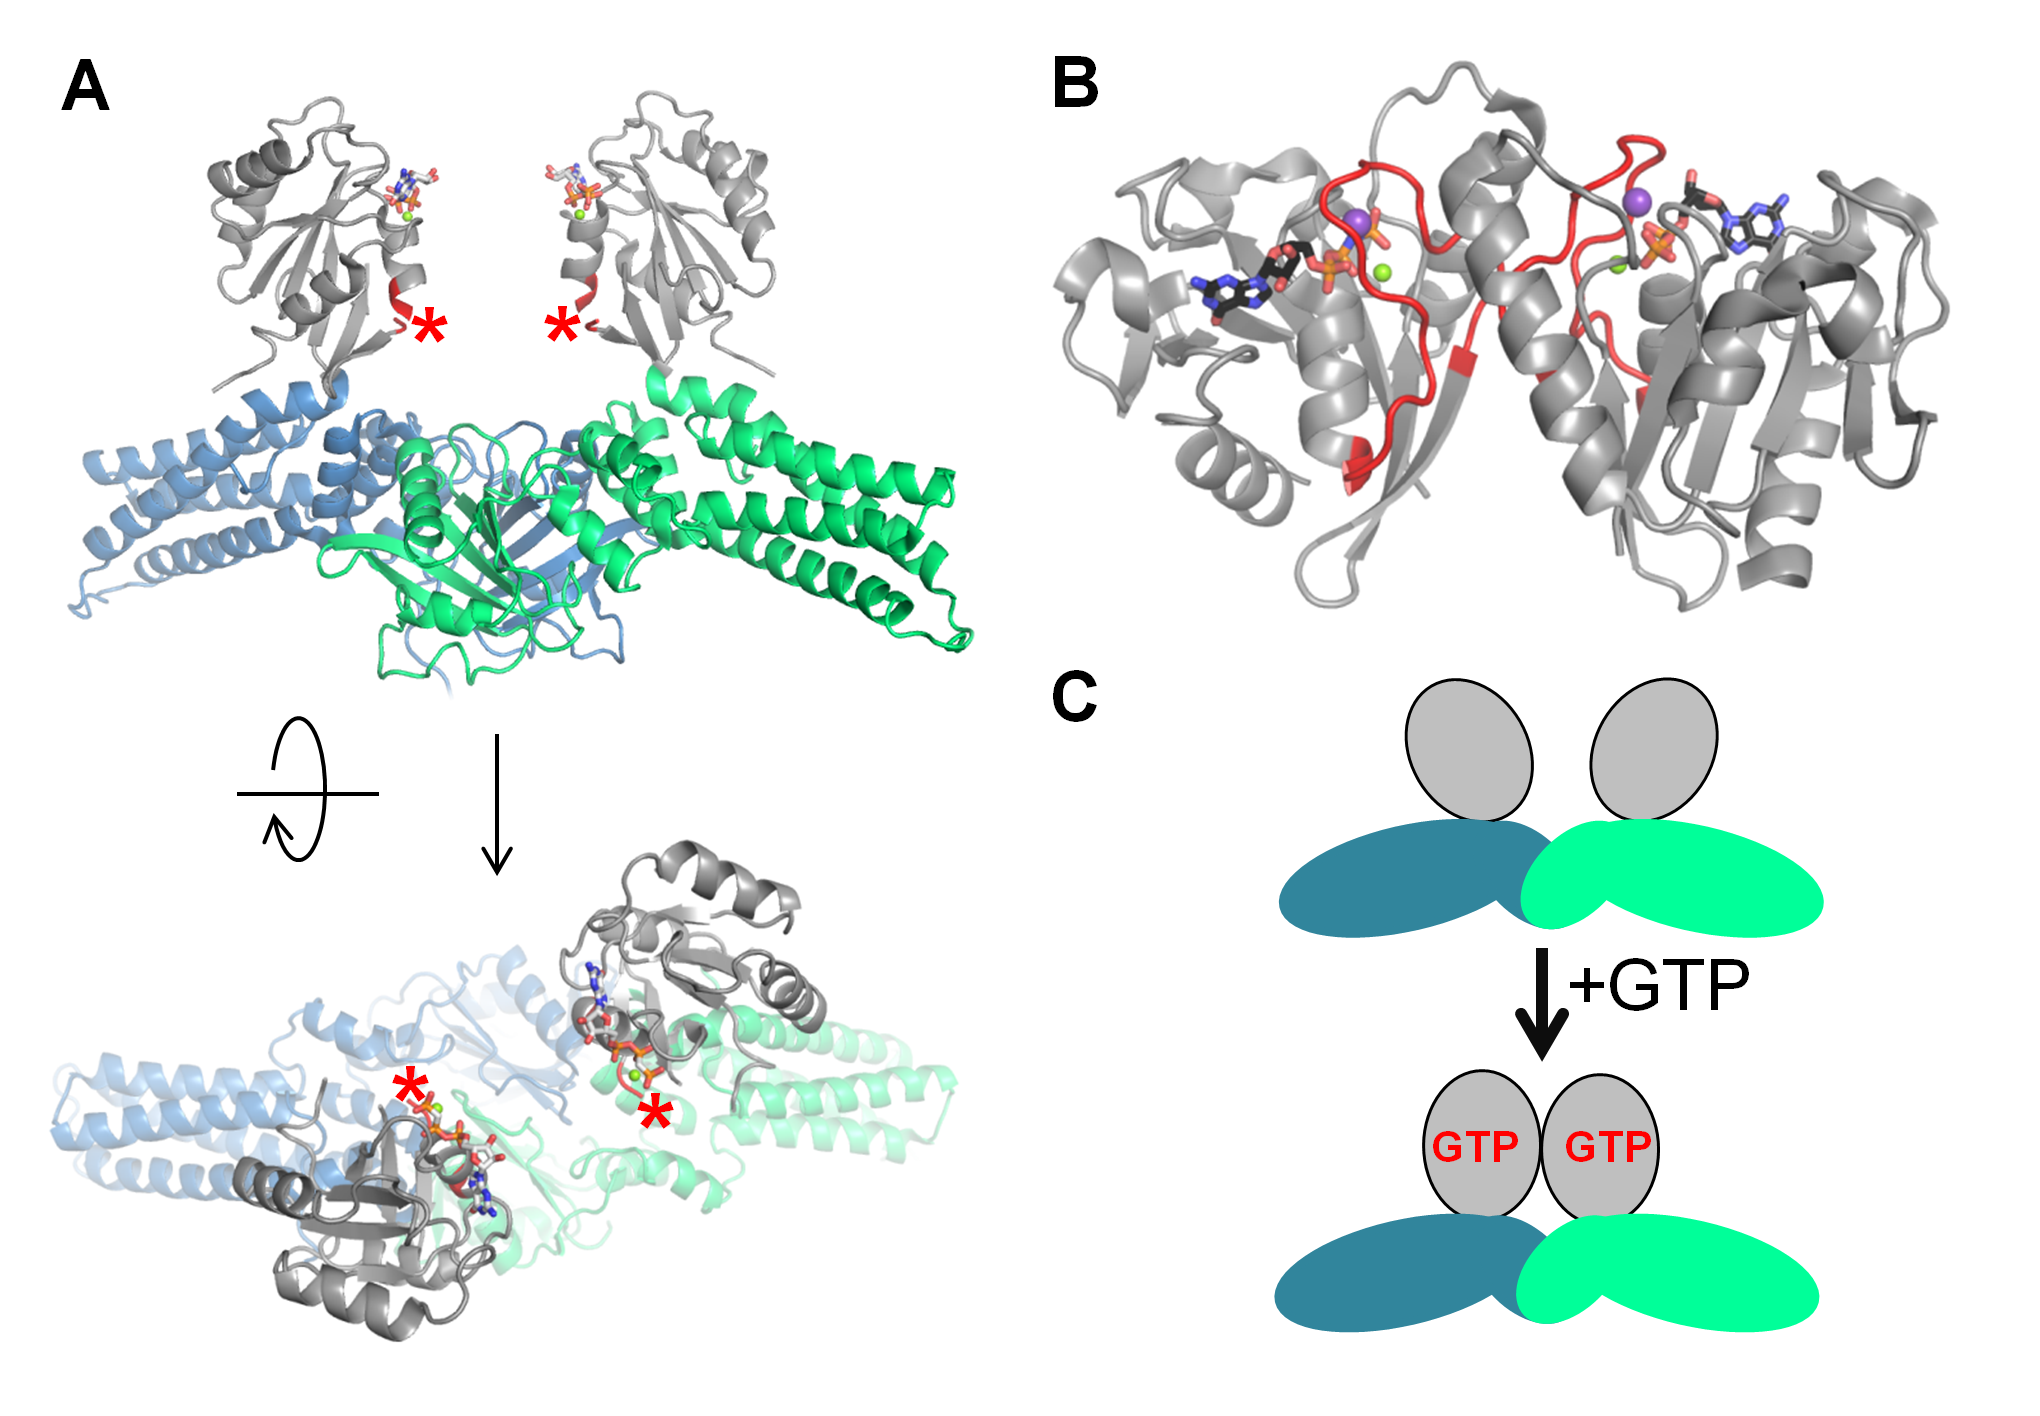

Supplement: supp [file elife-37373-supp-v1.zip › elife_poa_e37373_Figure_6_figure_supplement_2.png]

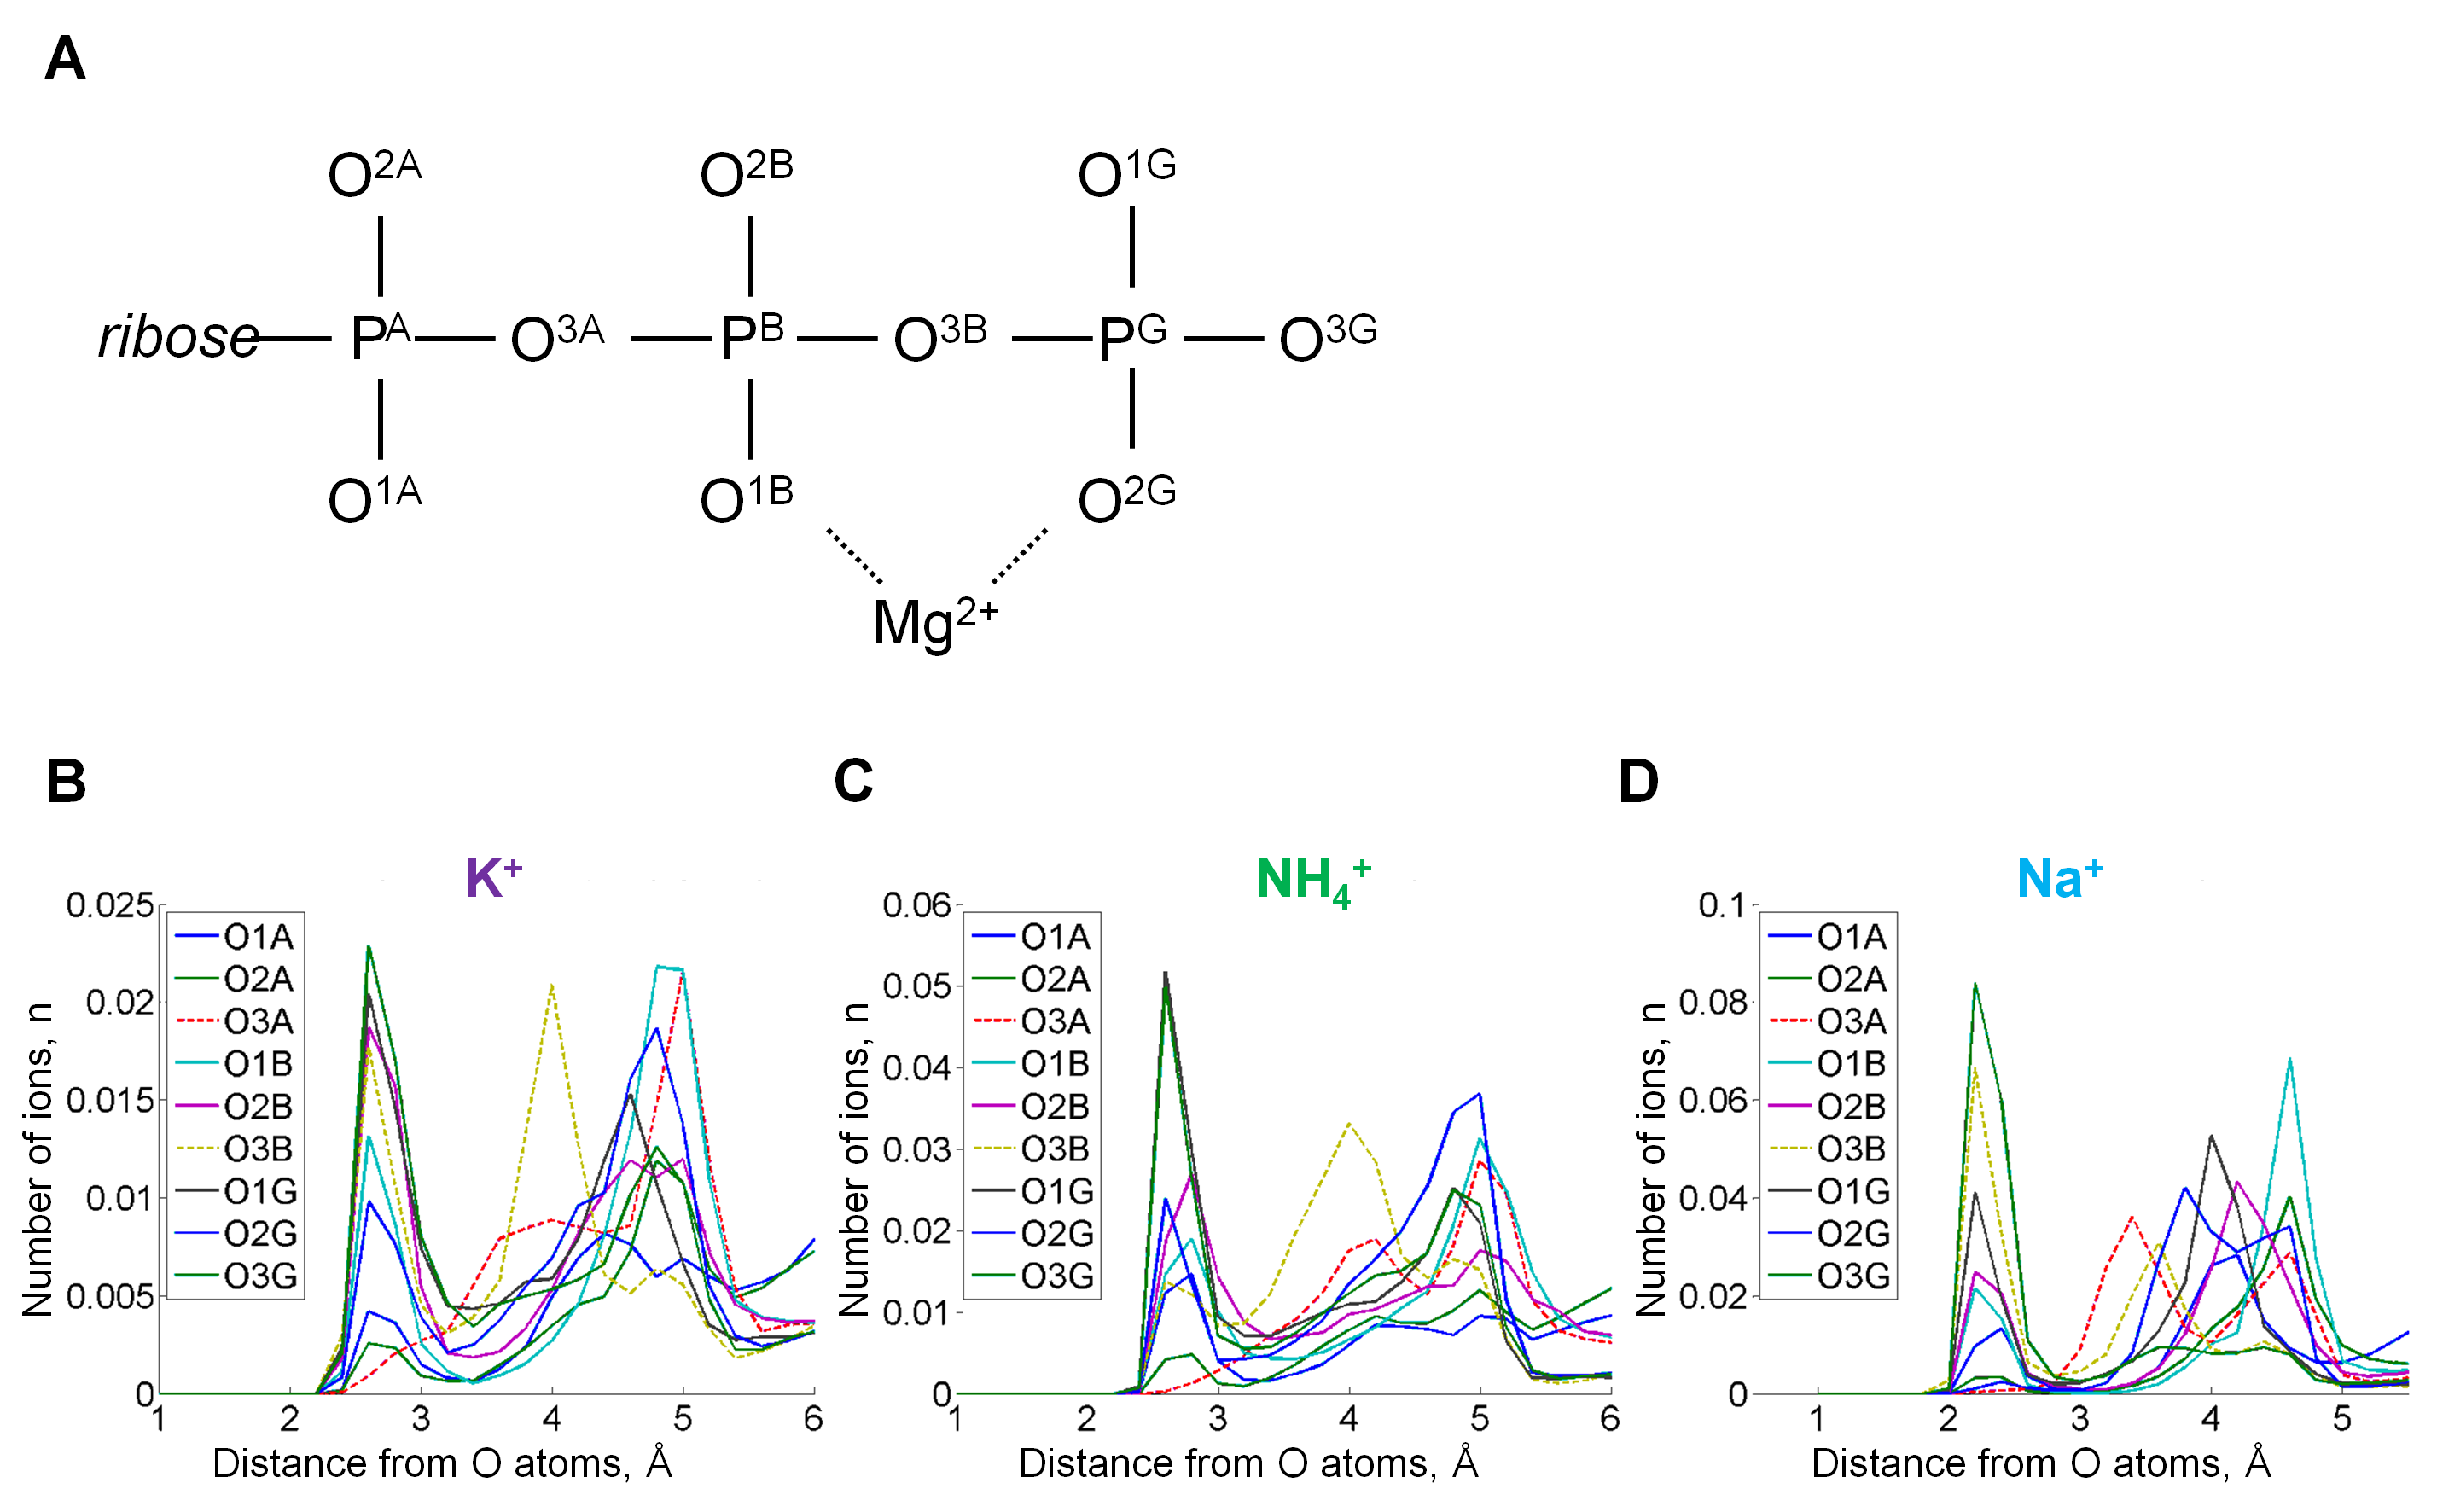

Supplement: supp [file elife-37373-supp-v1.zip › elife_poa_e37373_Figure_2_figure_supplement_1.png]

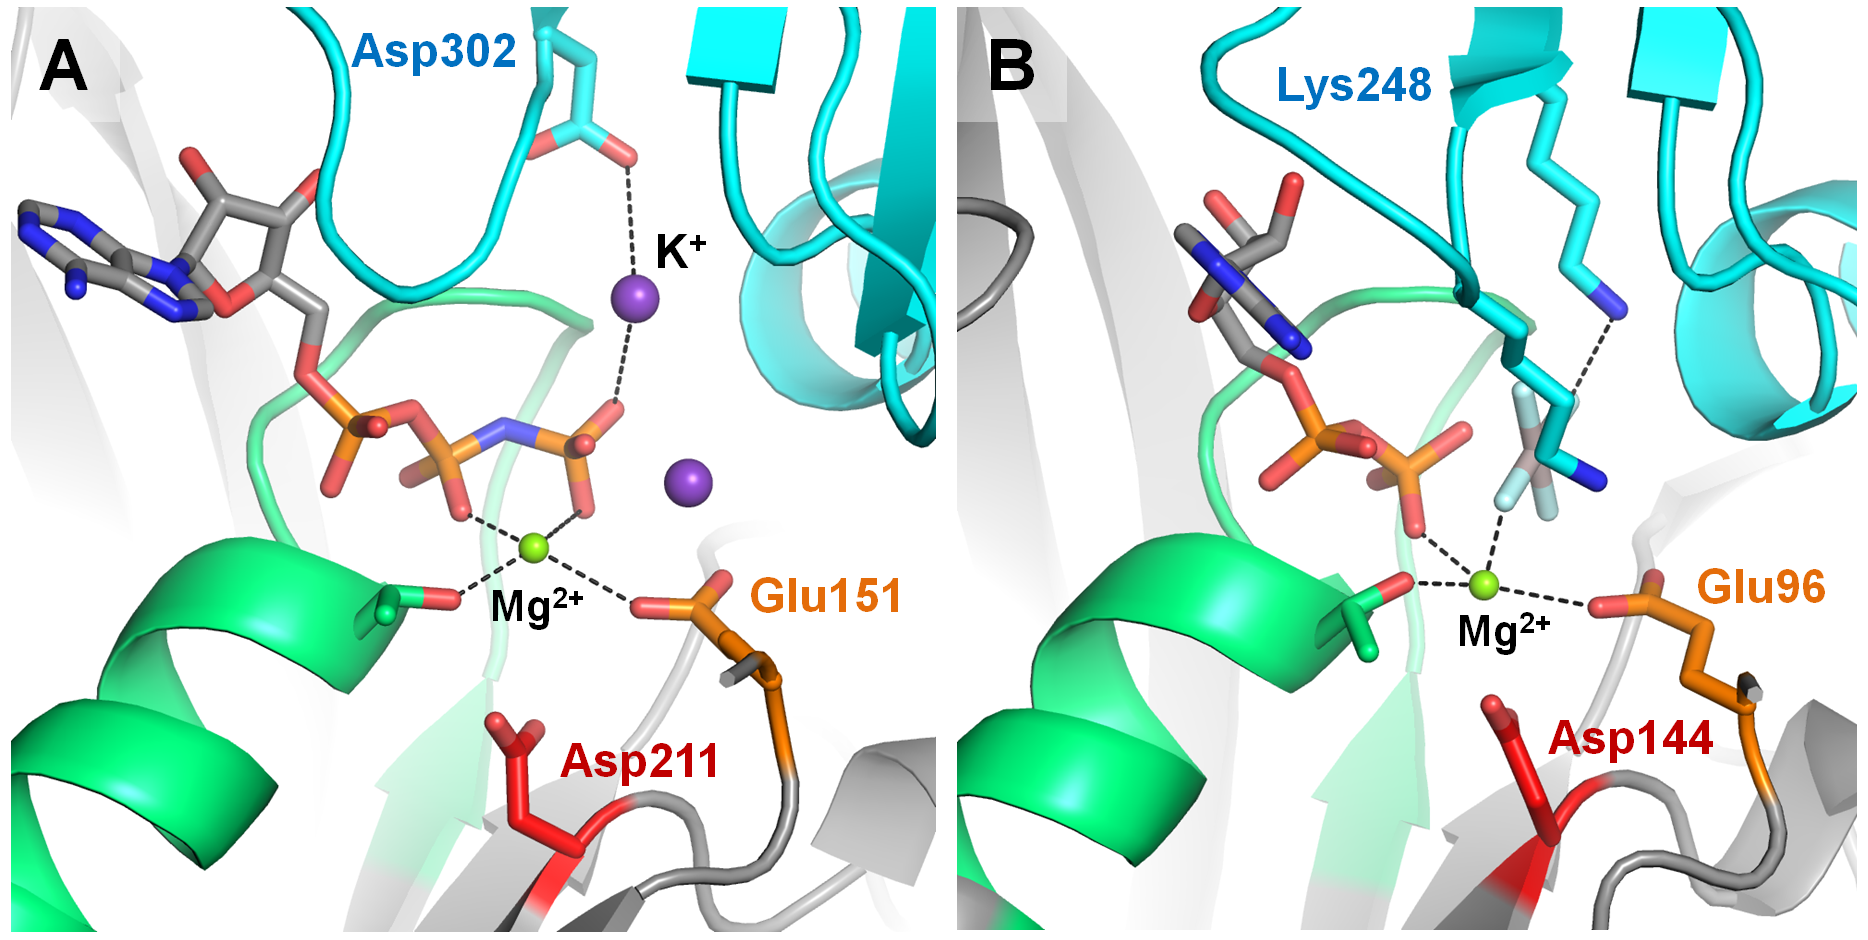

Supplement: supp [file elife-37373-supp-v1.zip › elife_poa_e37373_Figure_6_figure_supplement_4.png]

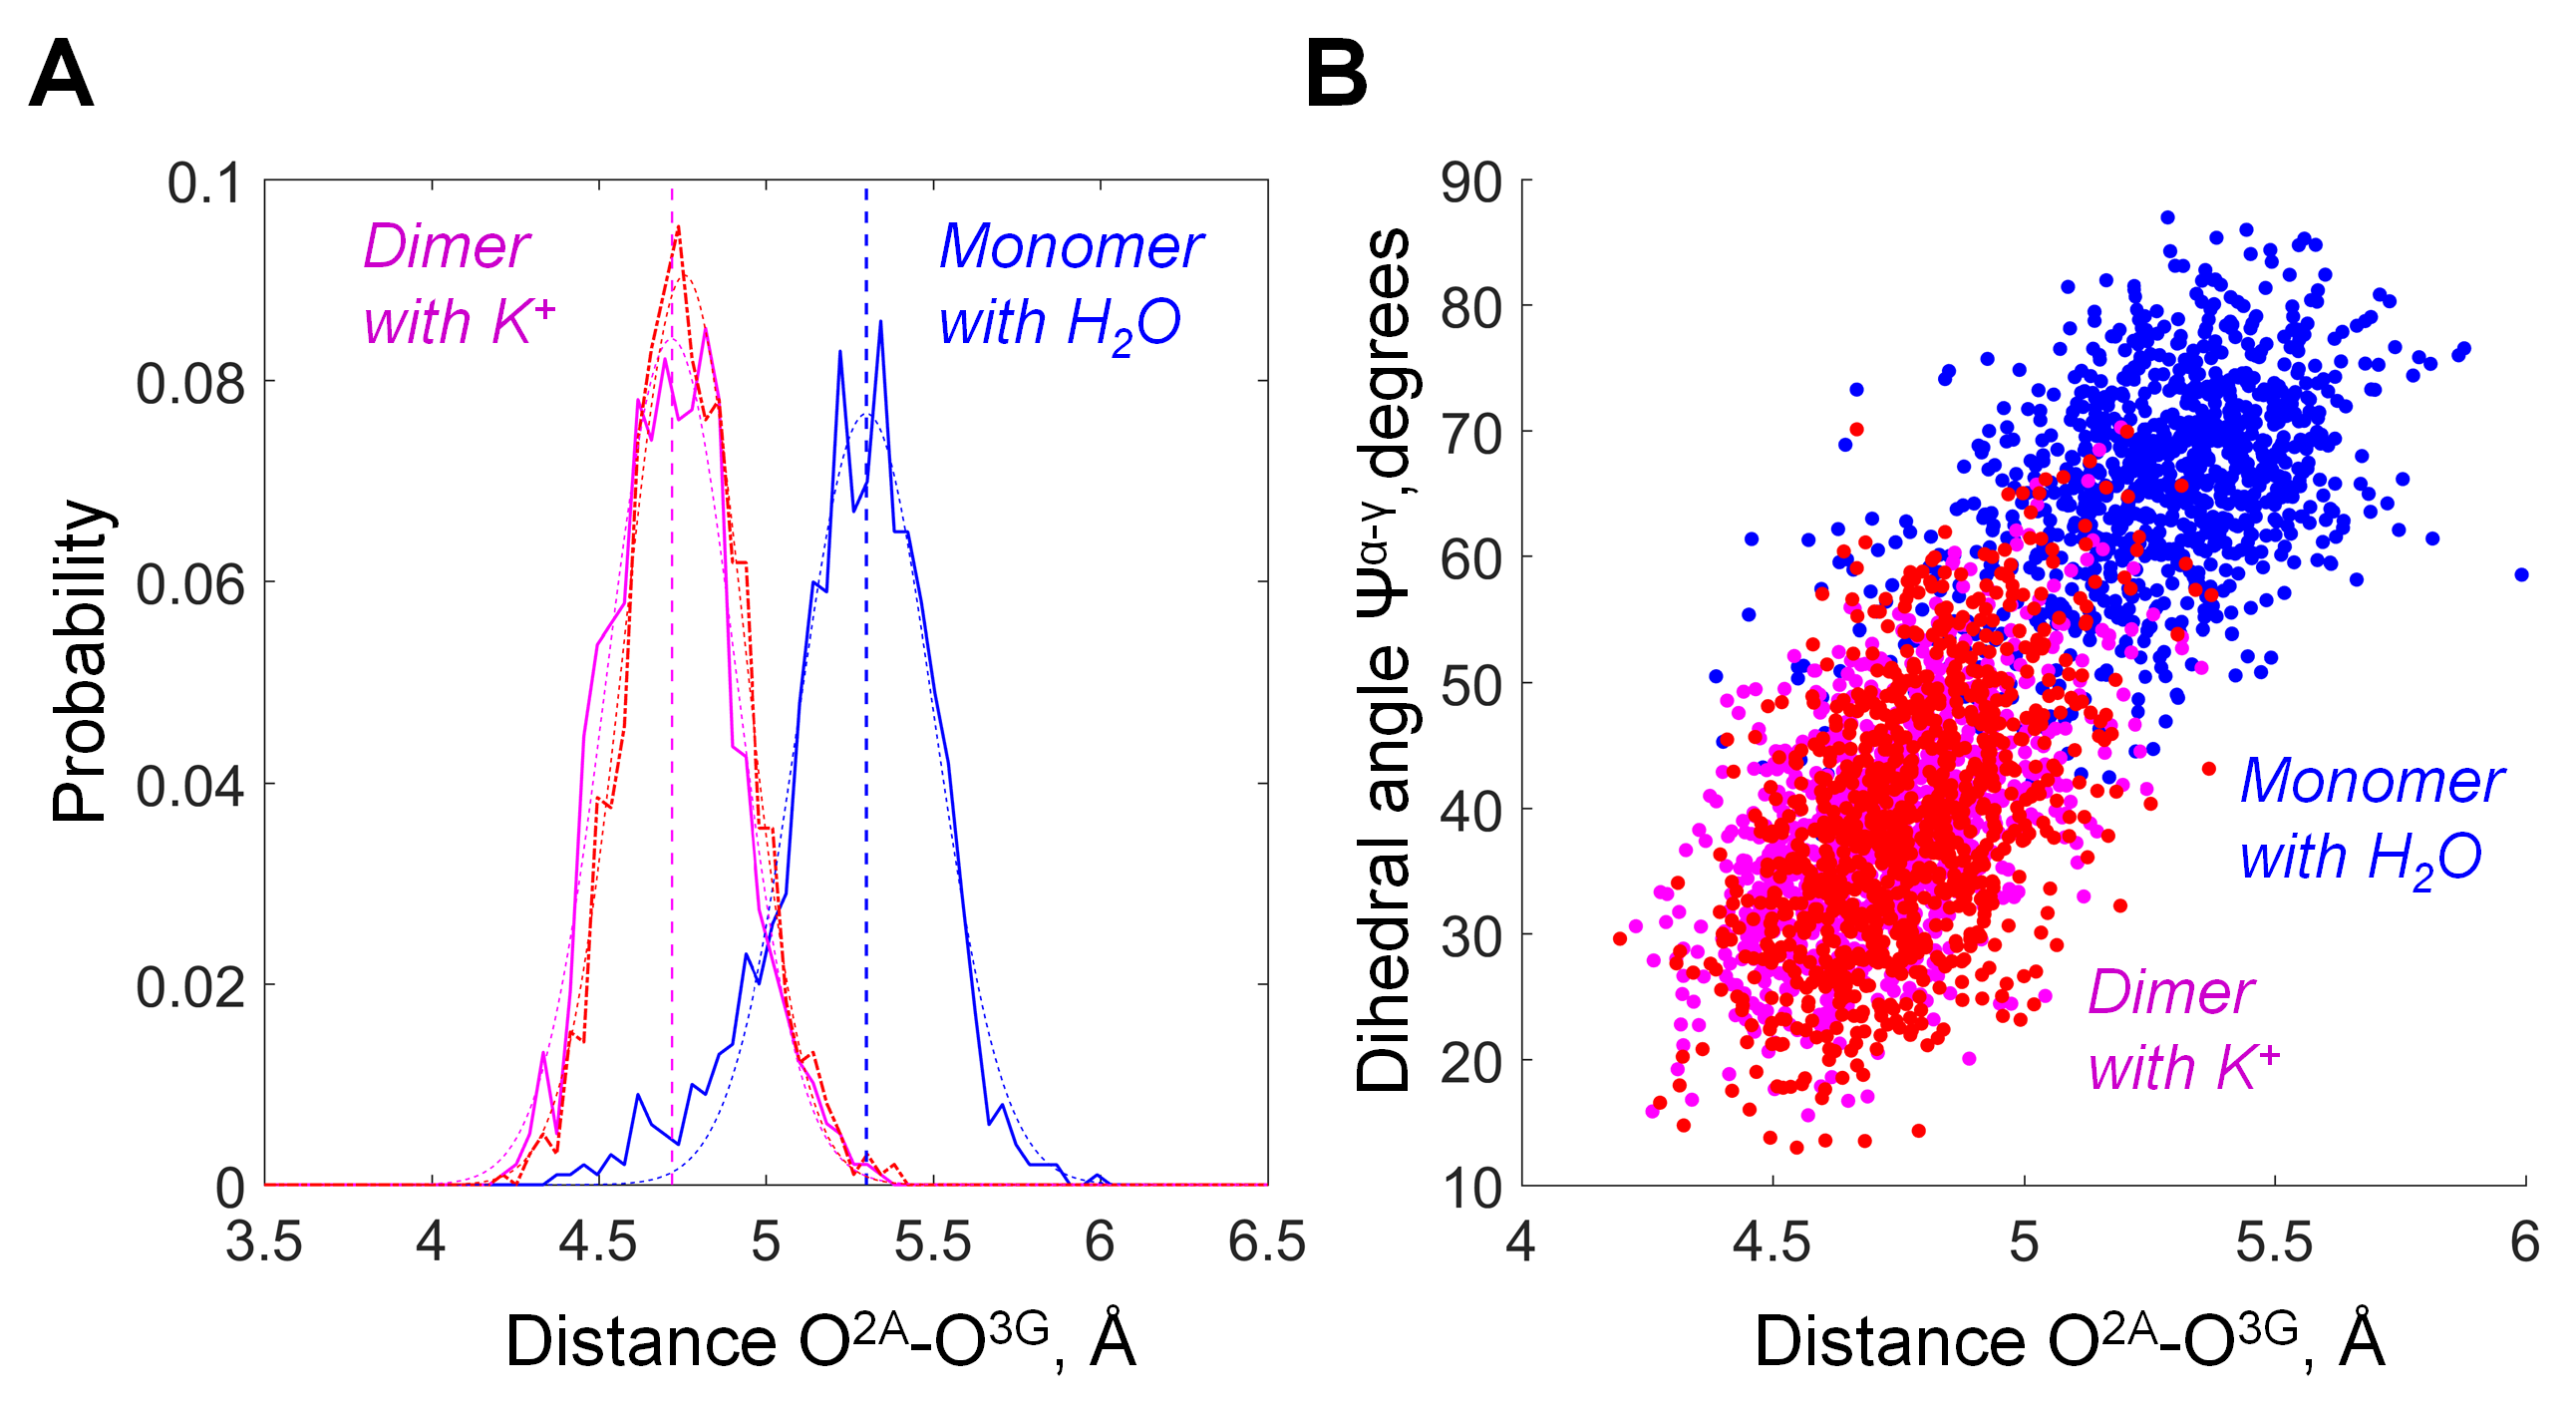

Supplement: supp [file elife-37373-supp-v1.zip › elife_poa_e37373_Figure_7_figure_supplement_2.png]

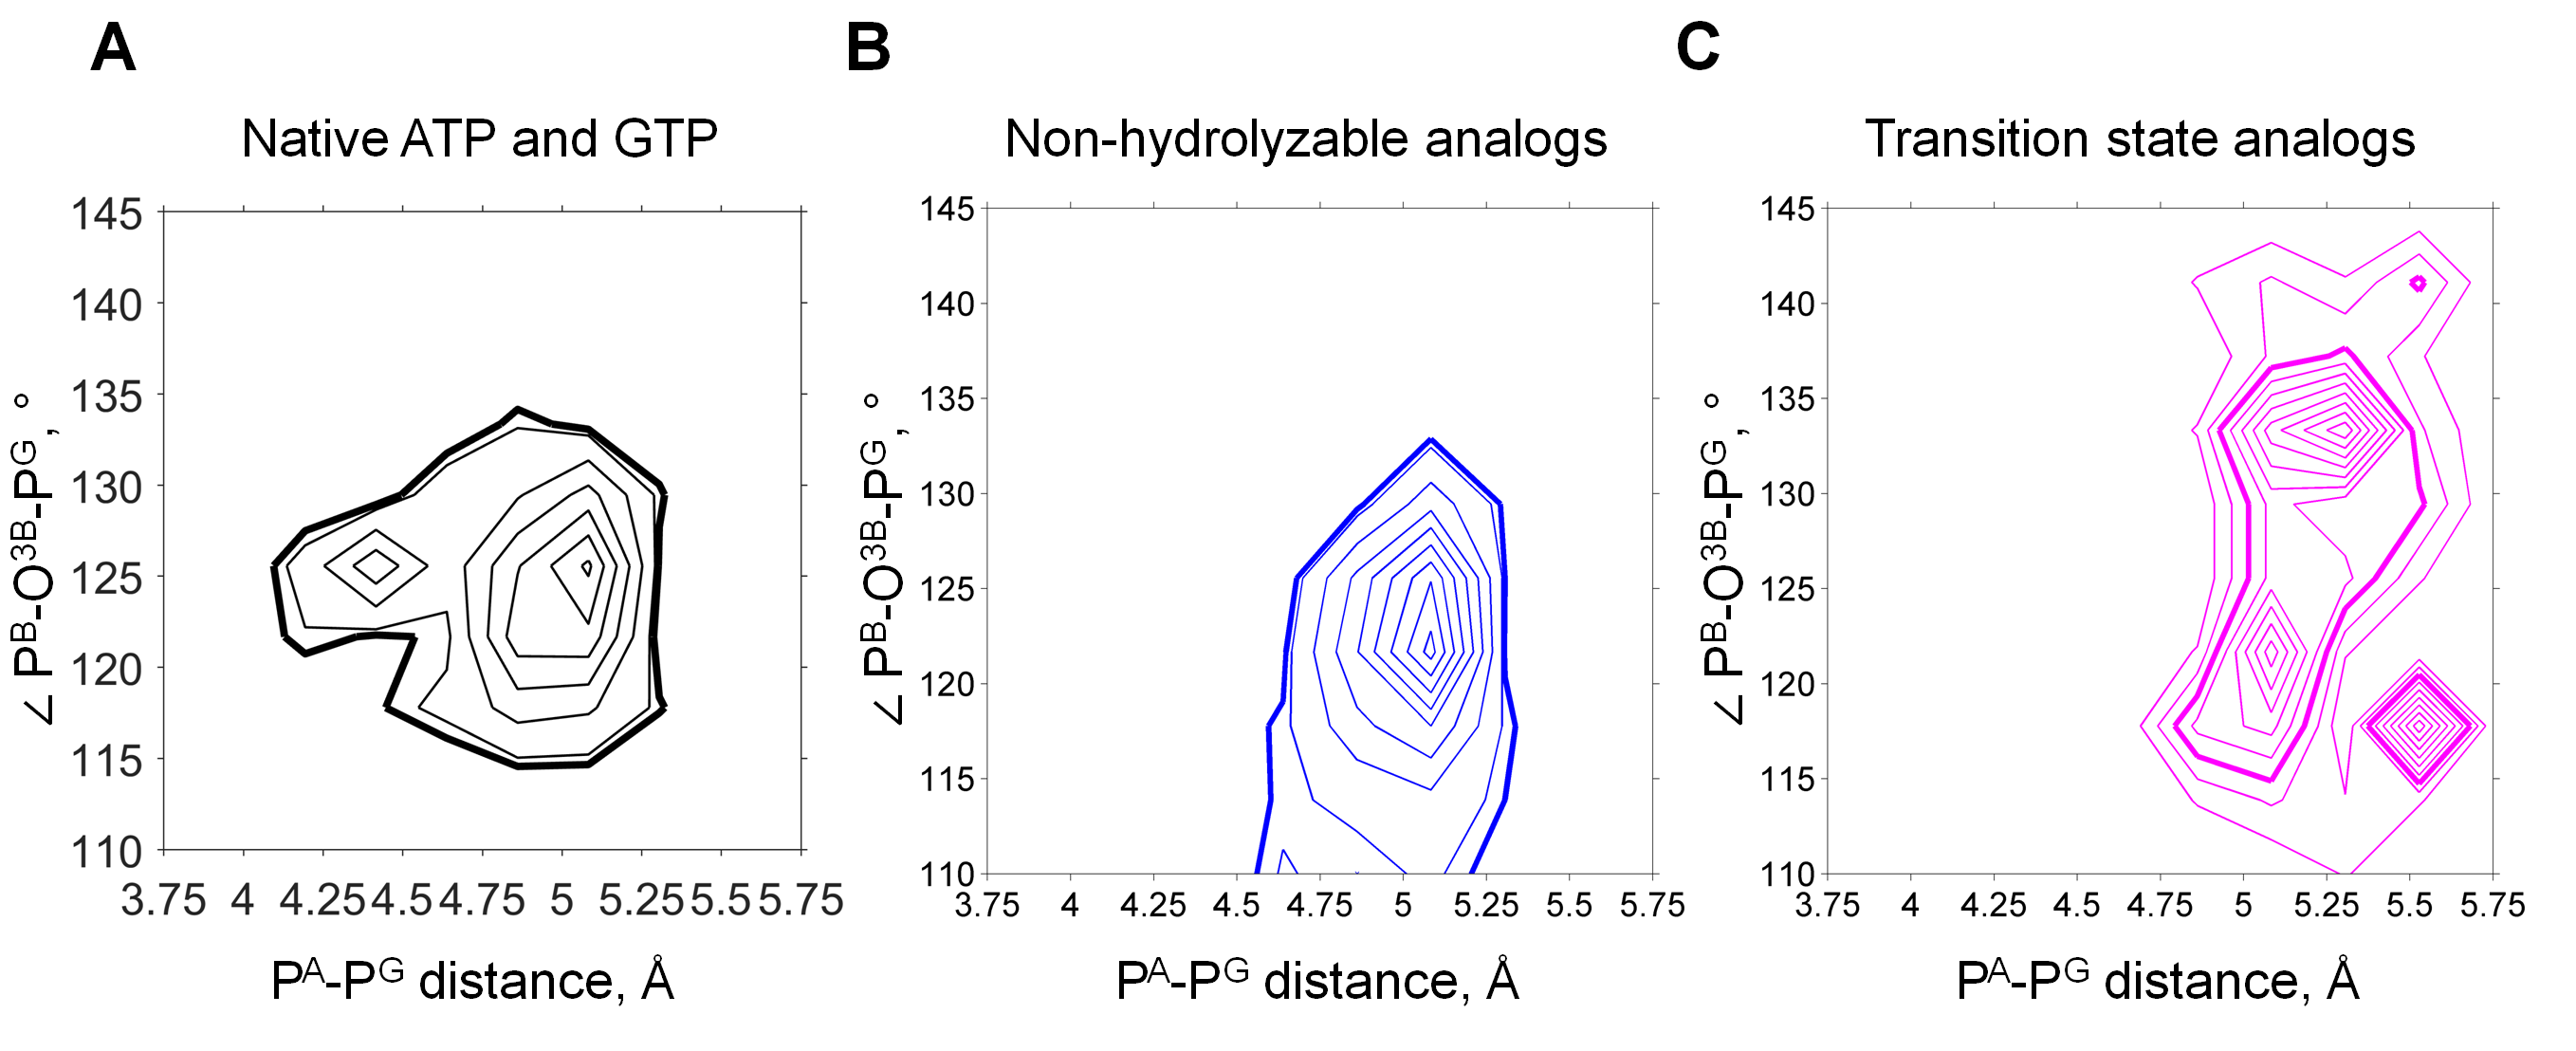

Supplement: supp [file elife-37373-supp-v1.zip › elife_poa_e37373_Figure_5_figure_supplement_2.png]

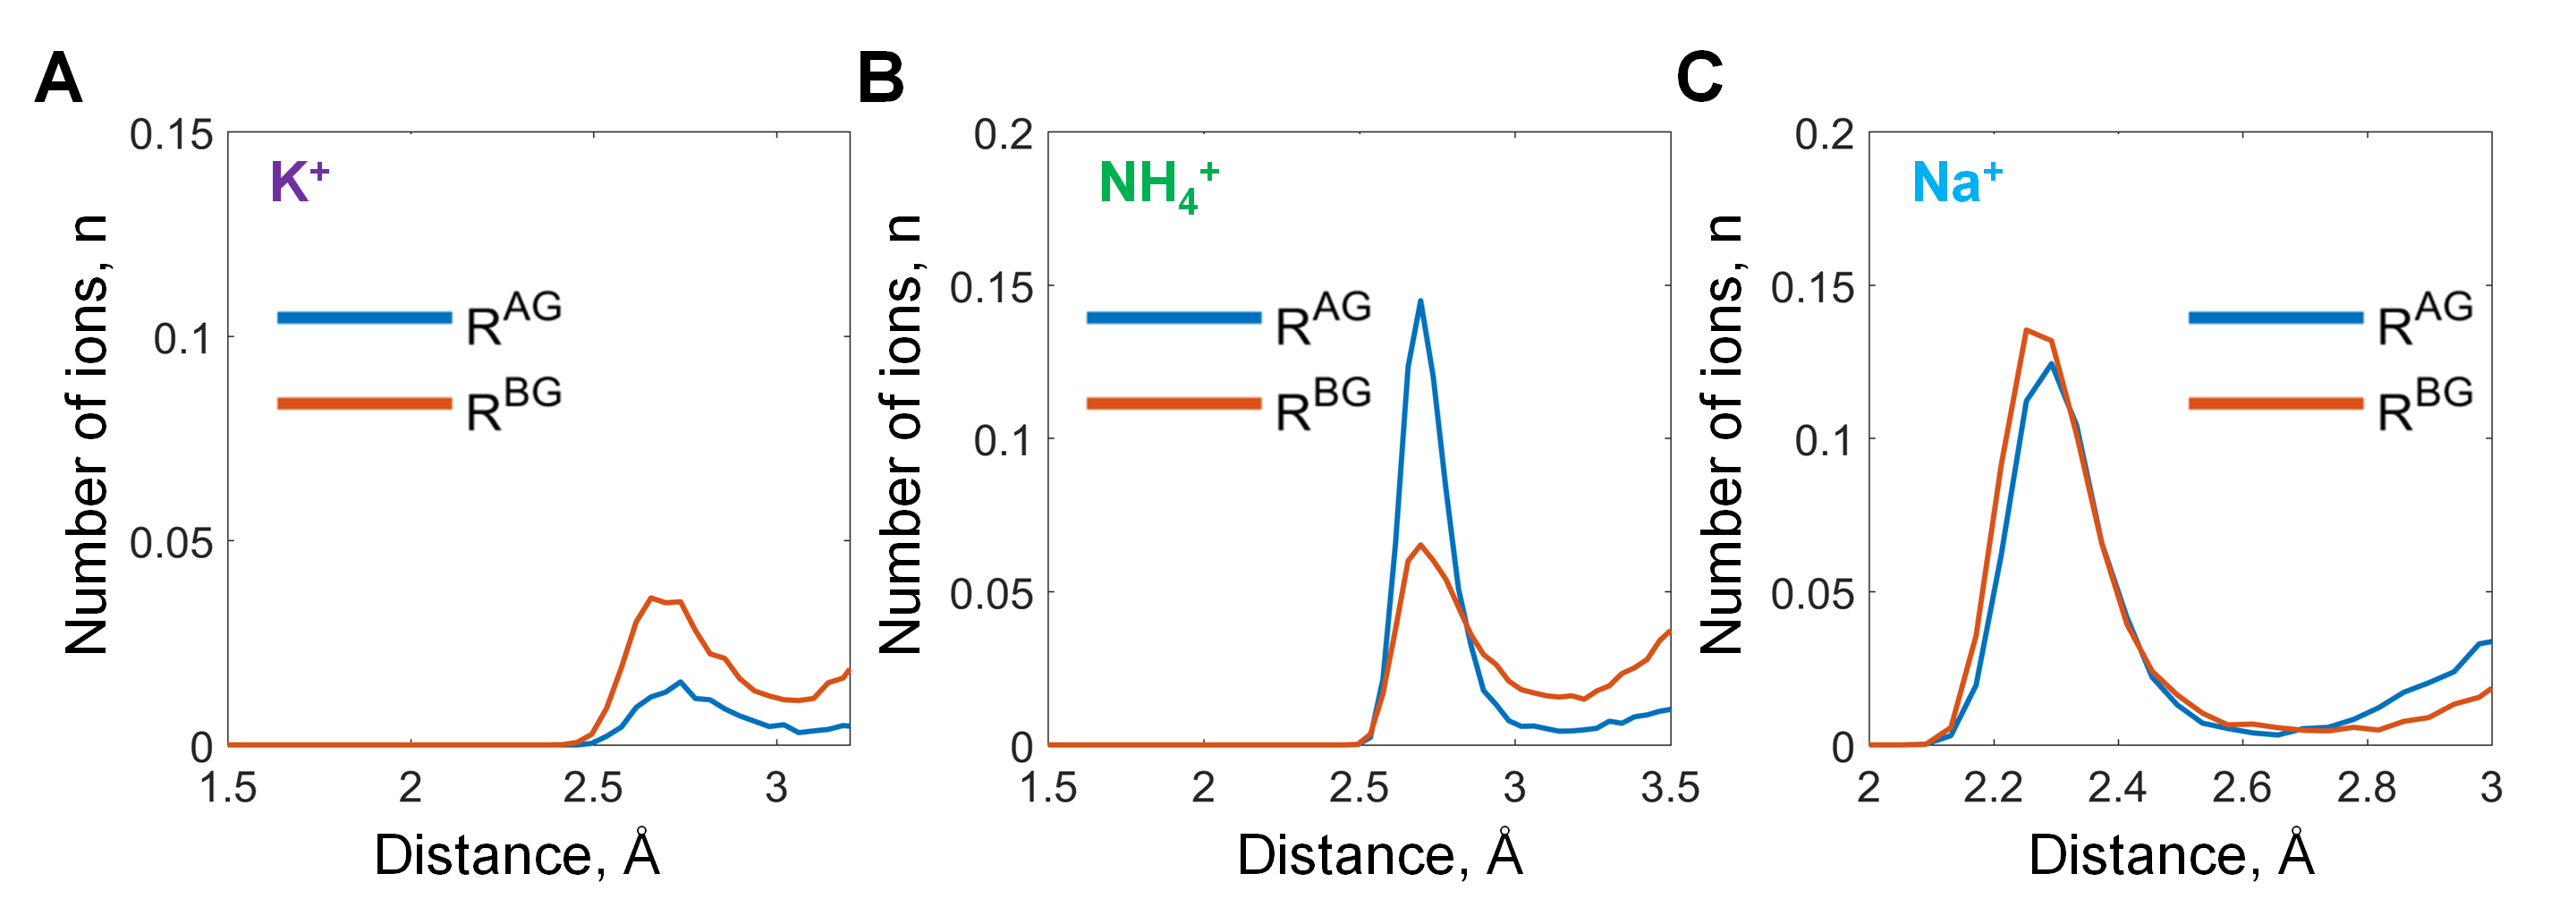

Supplement: supp [file elife-37373-supp-v1.zip › elife_poa_e37373_Figure_2_figure_supplement_3.png]

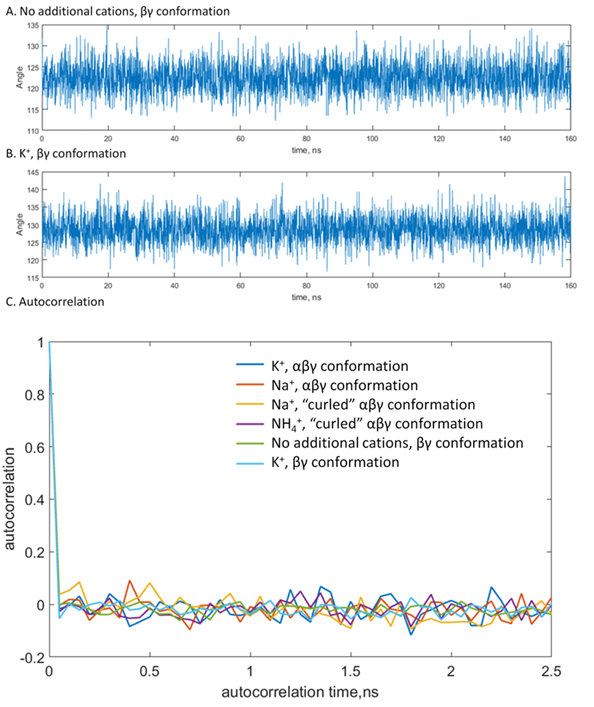

Supplement: supp [file elife-37373-supp-v1.zip › elife_poa_e37373_Figure_4_Figure_Supplement_3.tif]

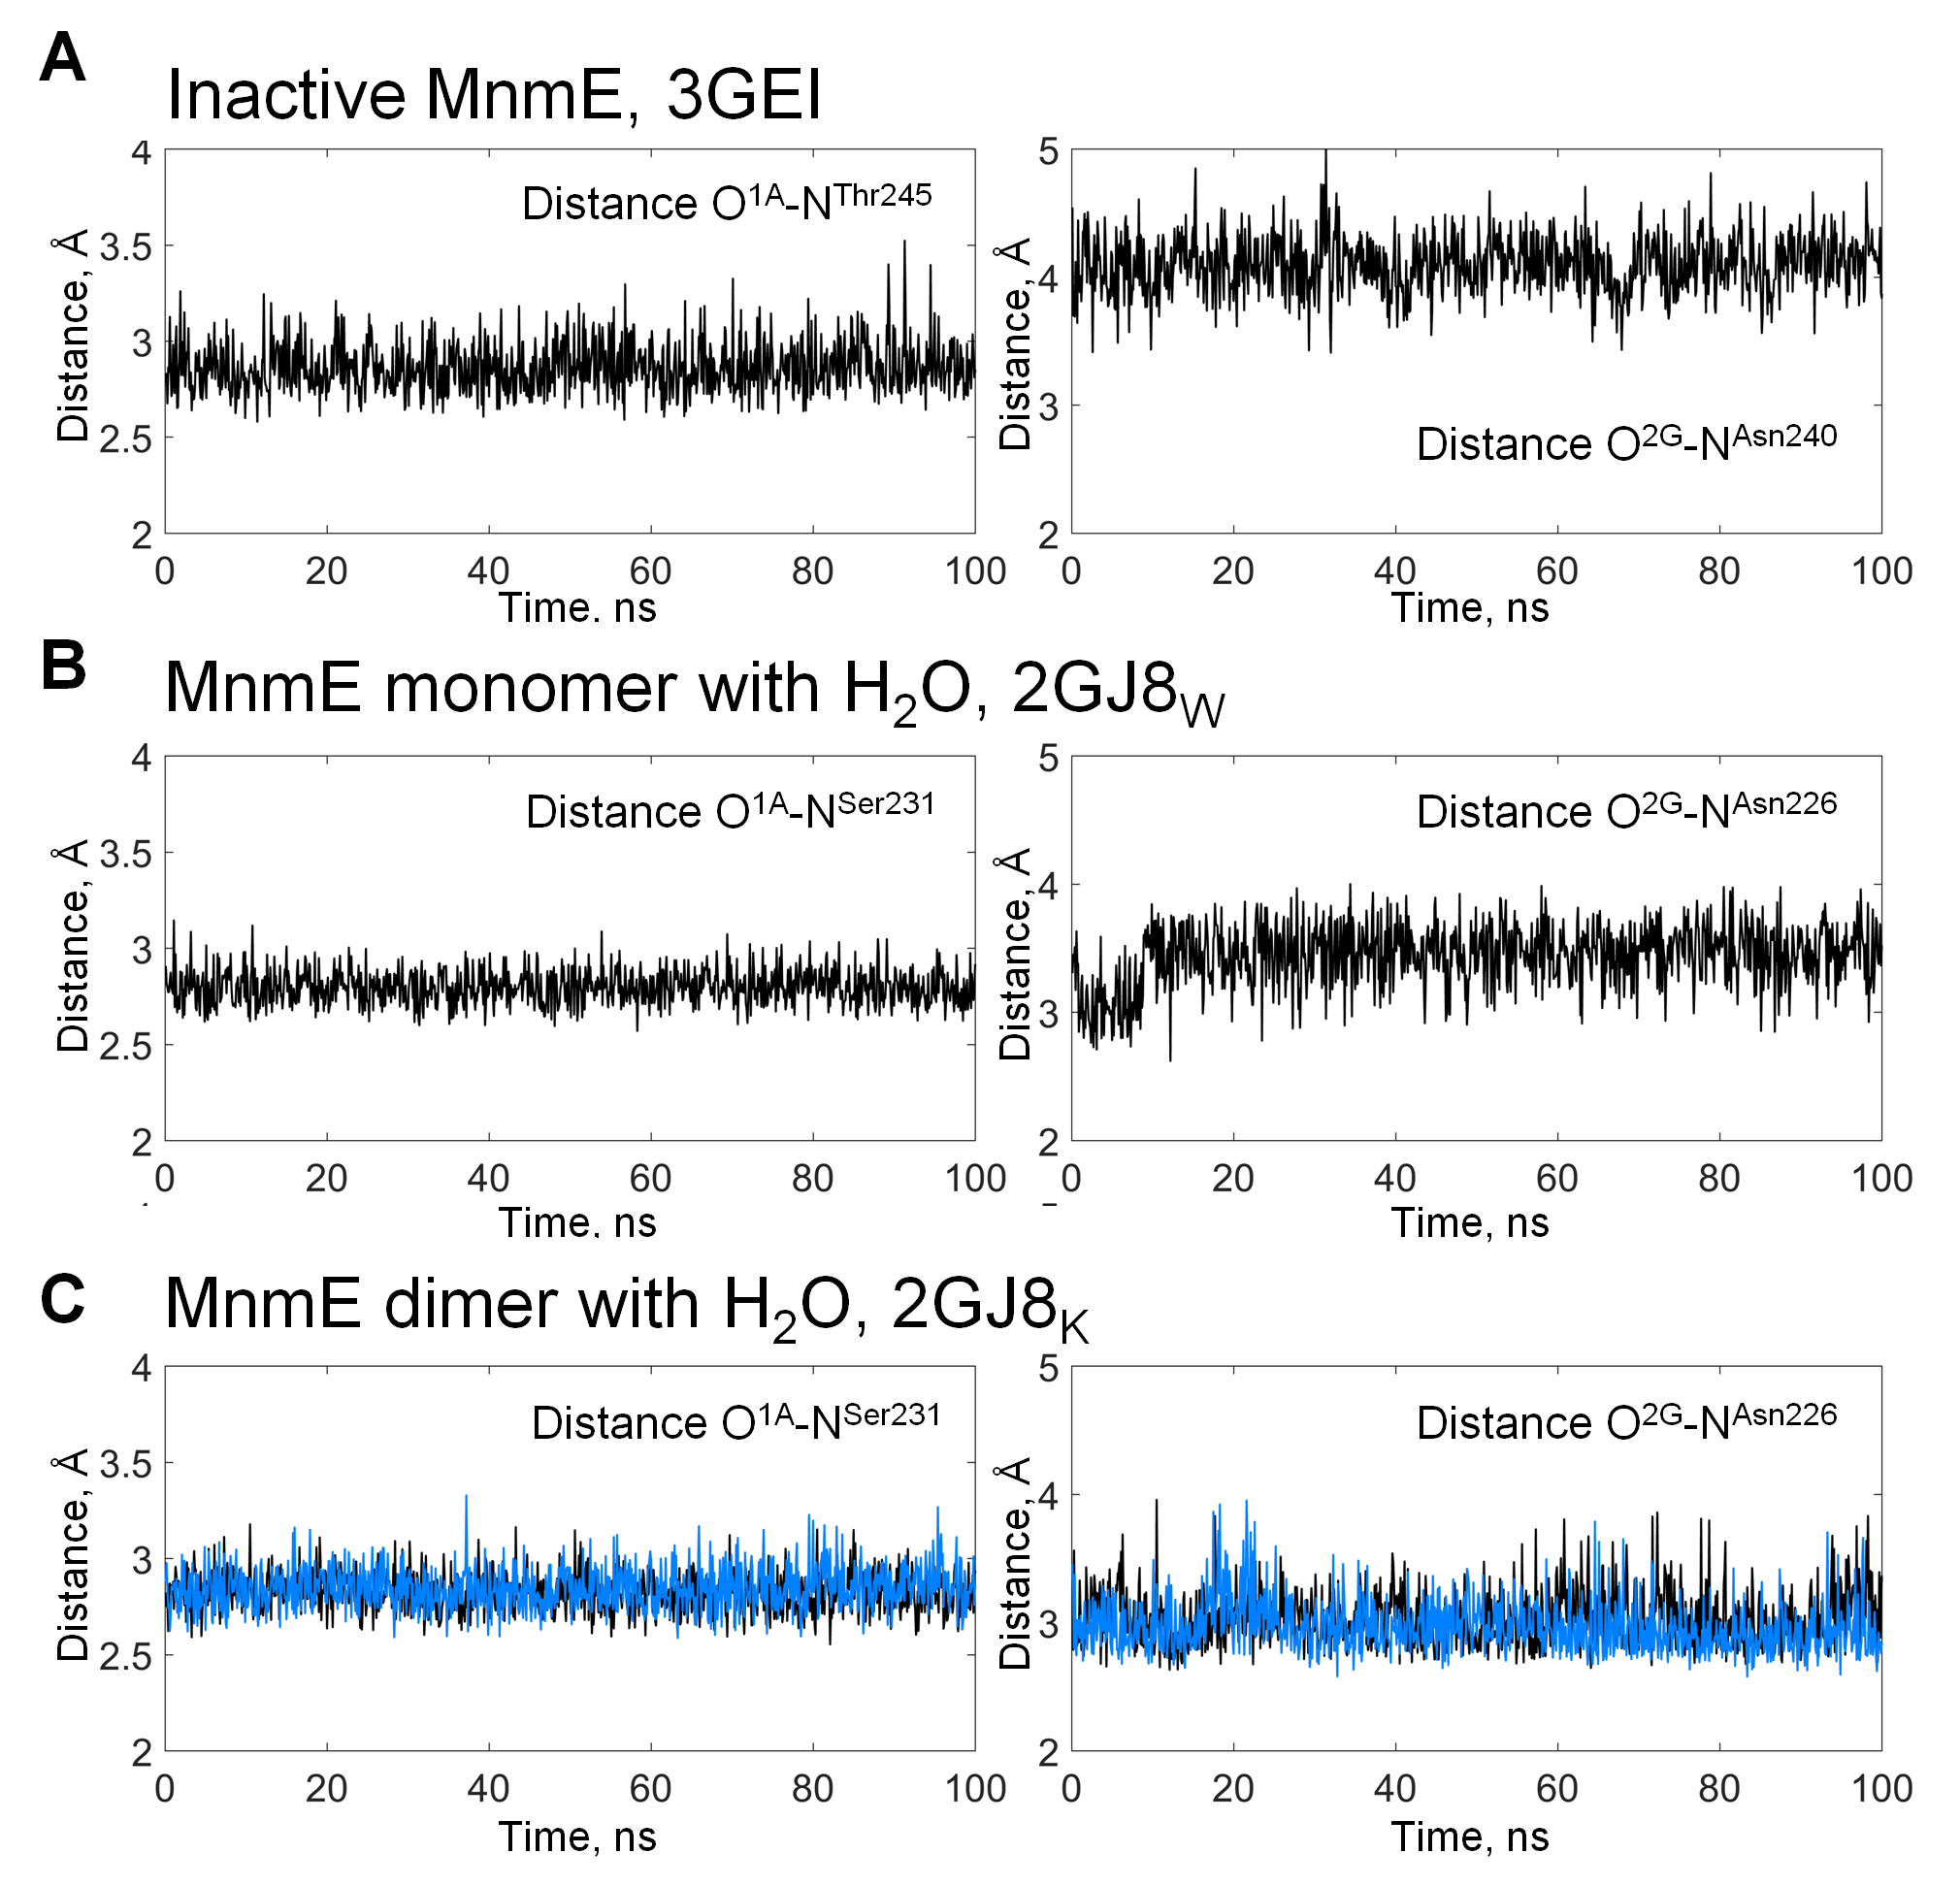

Supplement: supp [file elife-37373-supp-v1.zip › elife_poa_e37373_Figure_7_figure_supplement_1.png]

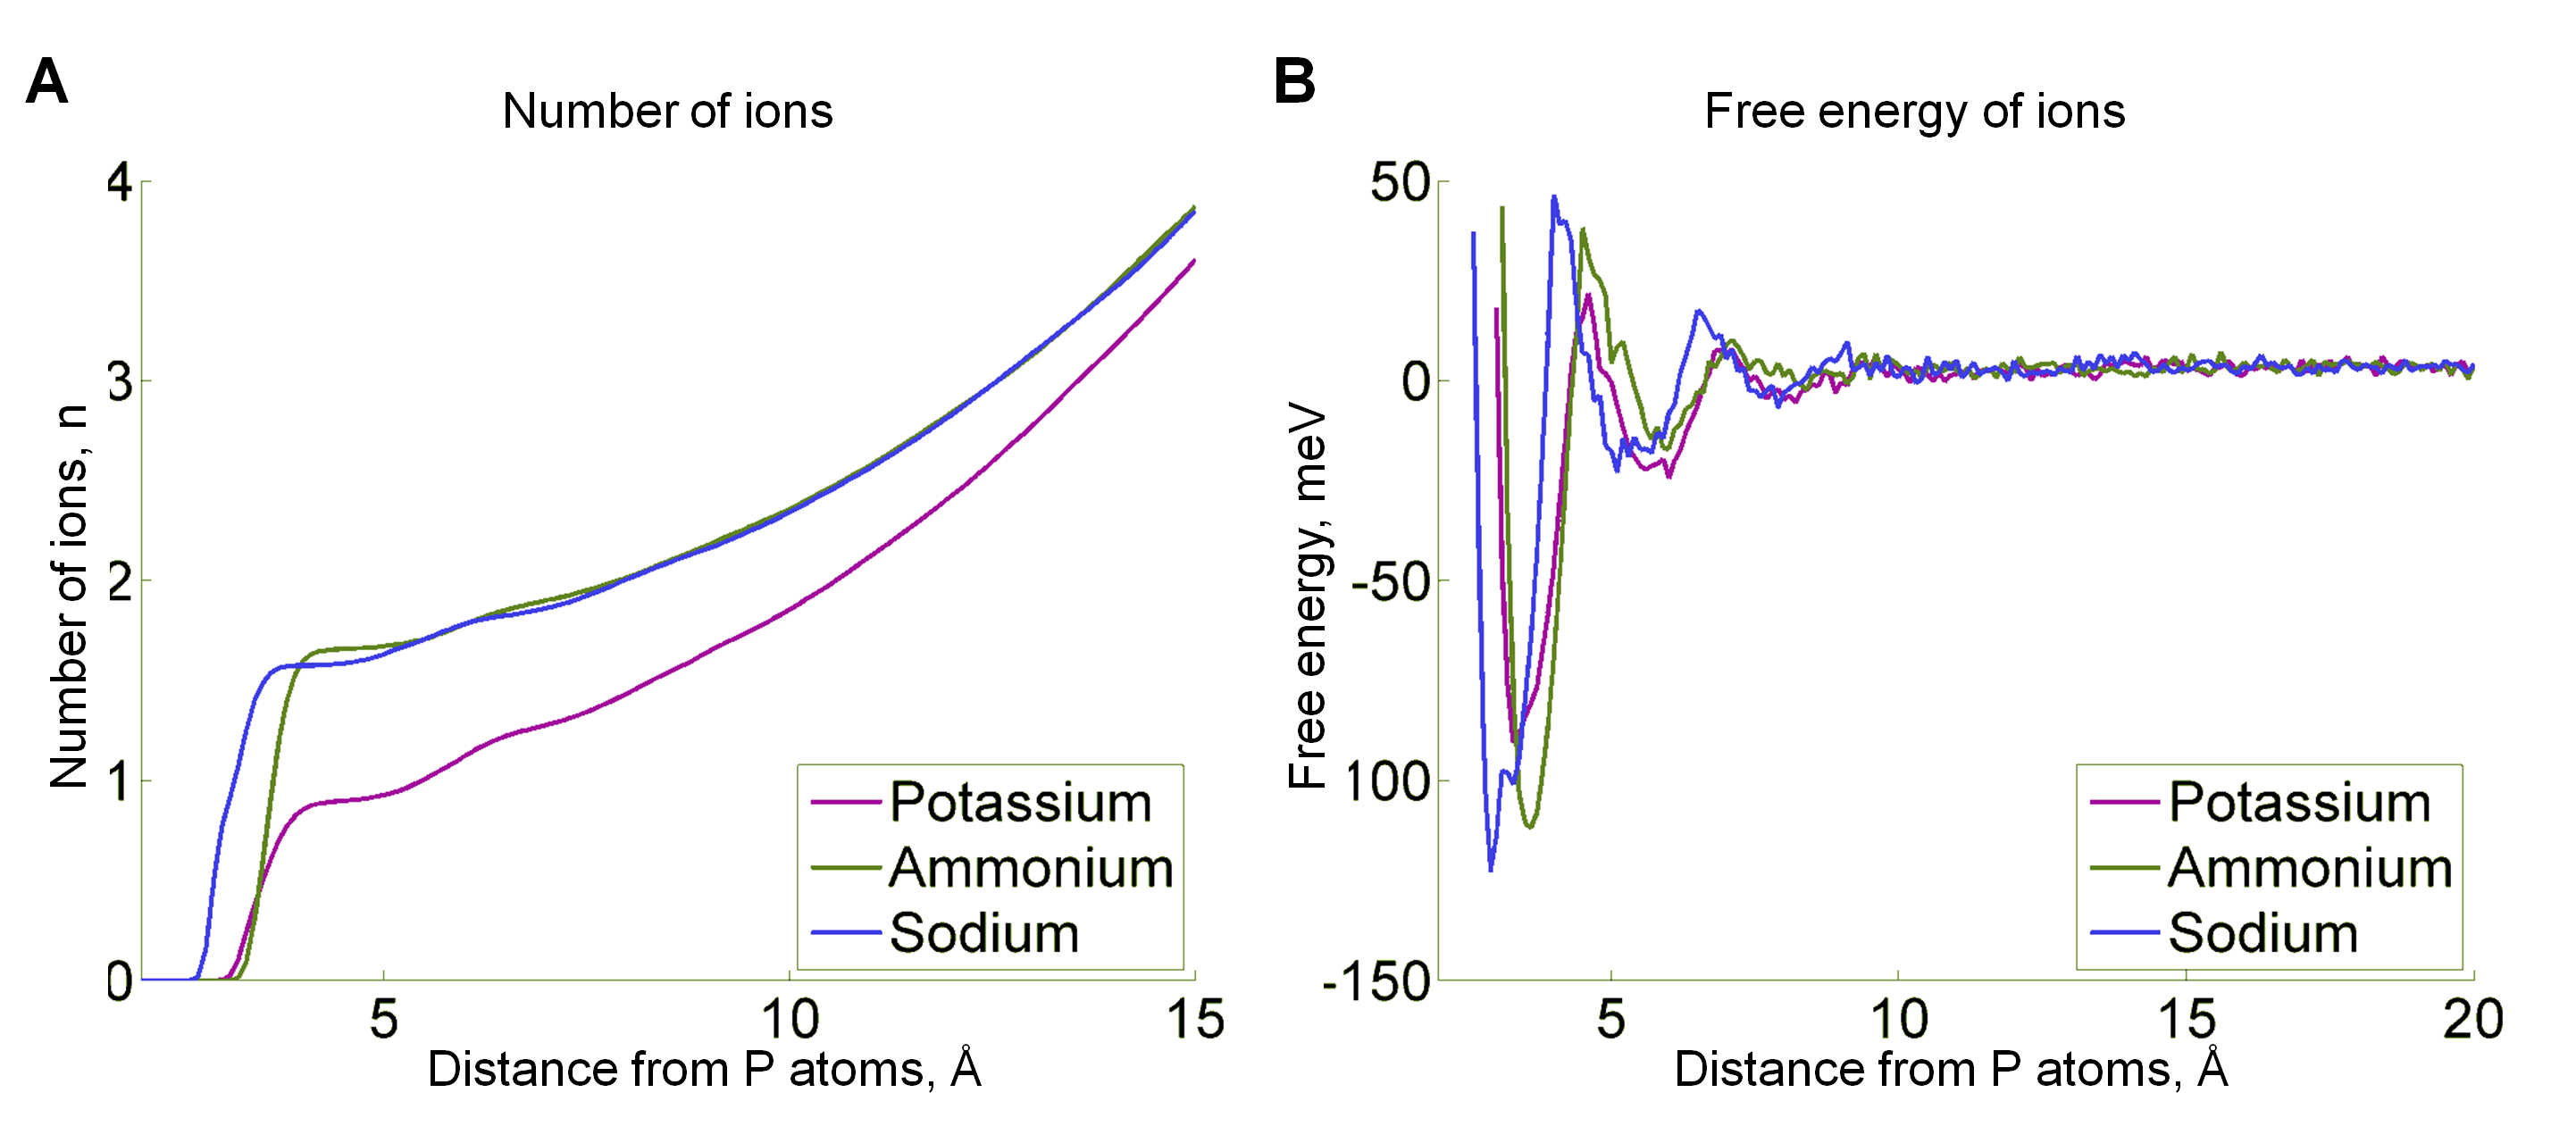

Supplement: supp [file elife-37373-supp-v1.zip › elife_poa_e37373_Figure_2_figure_supplement_2.png]

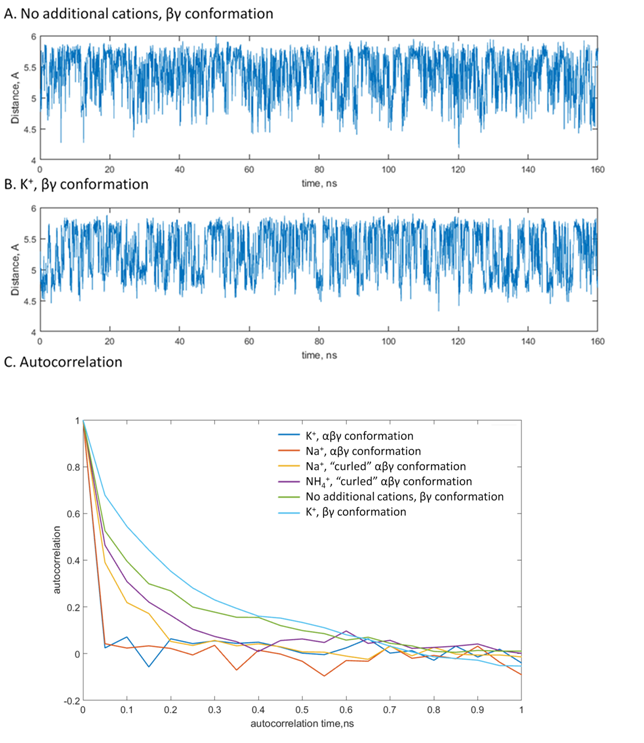

Supplement: supp [file elife-37373-supp-v1.zip › elife_poa_e37373_Figure_4_figure_supplement_2.tif]

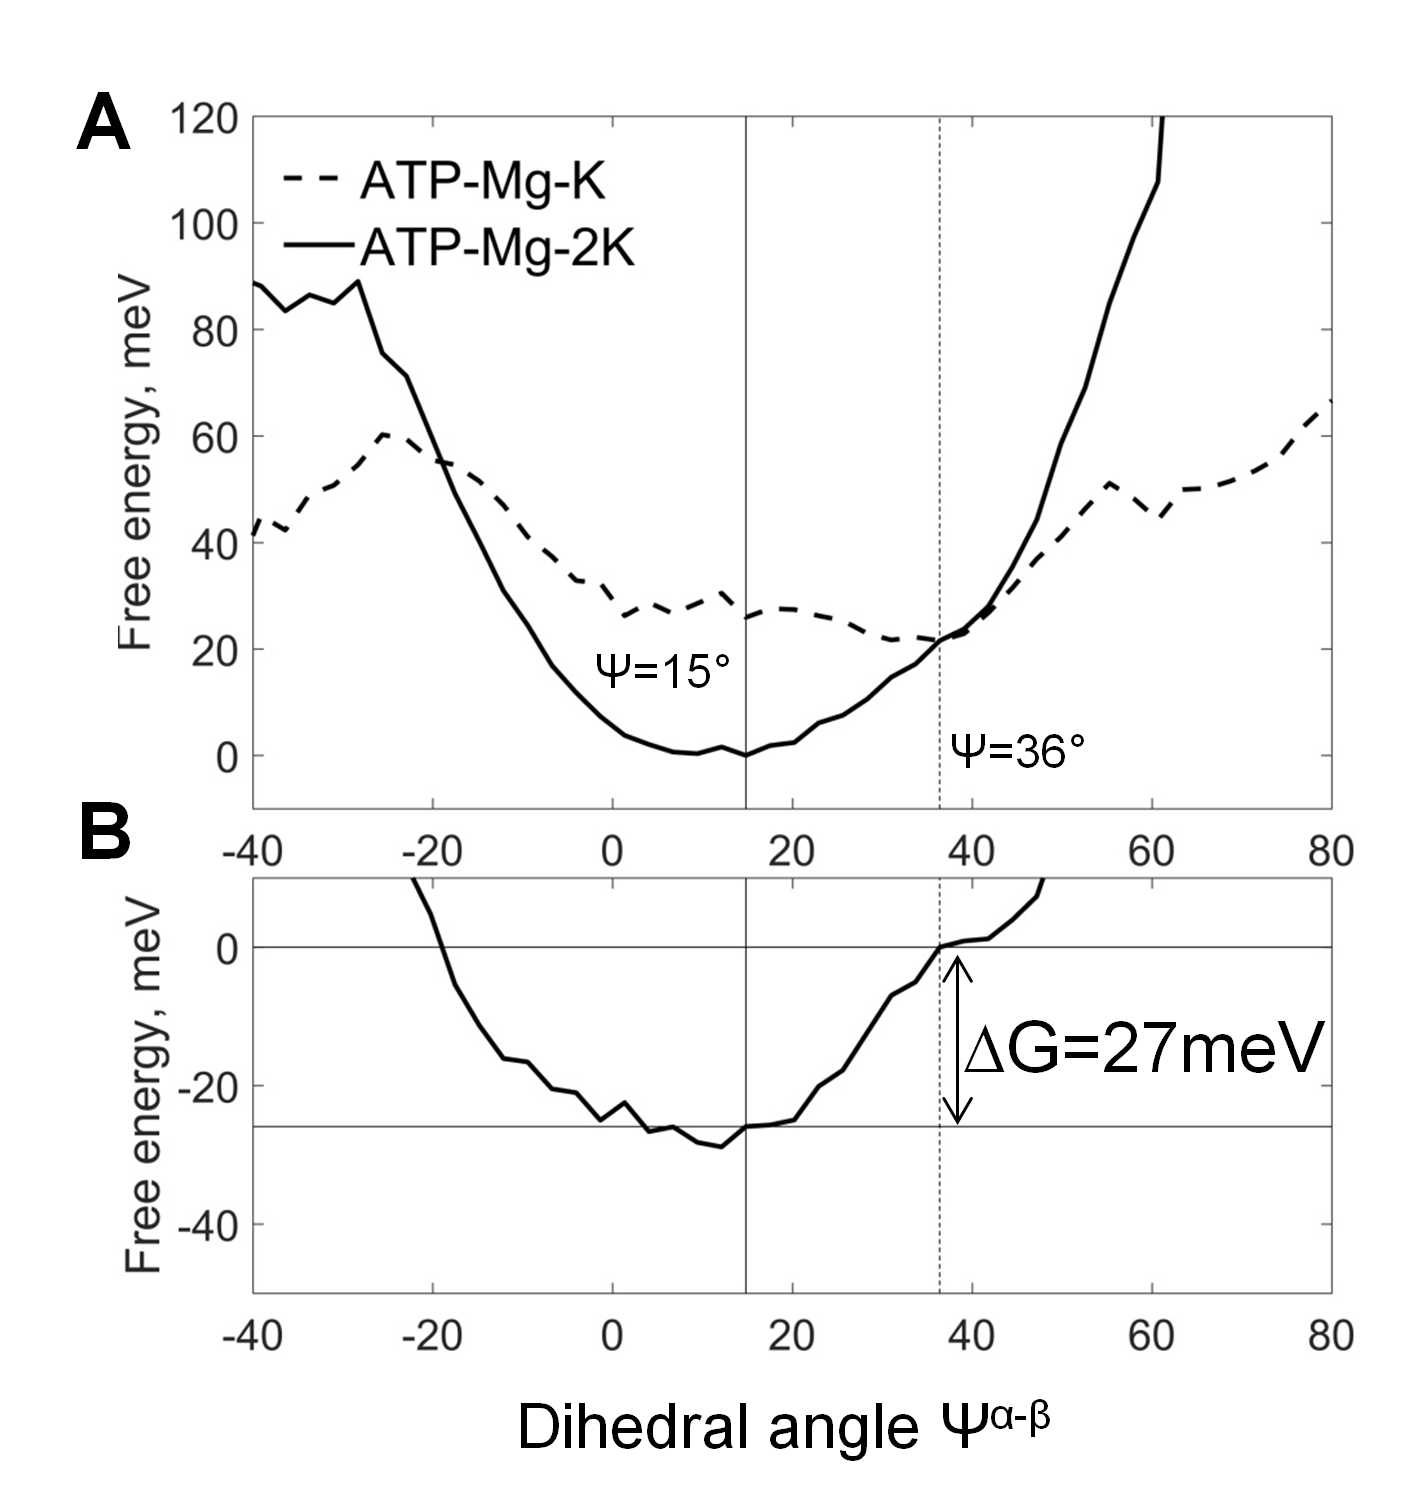

Supplement: supp [file elife-37373-supp-v1.zip › elife_poa_e37373_Figure_3_figure_supplement_1.png]

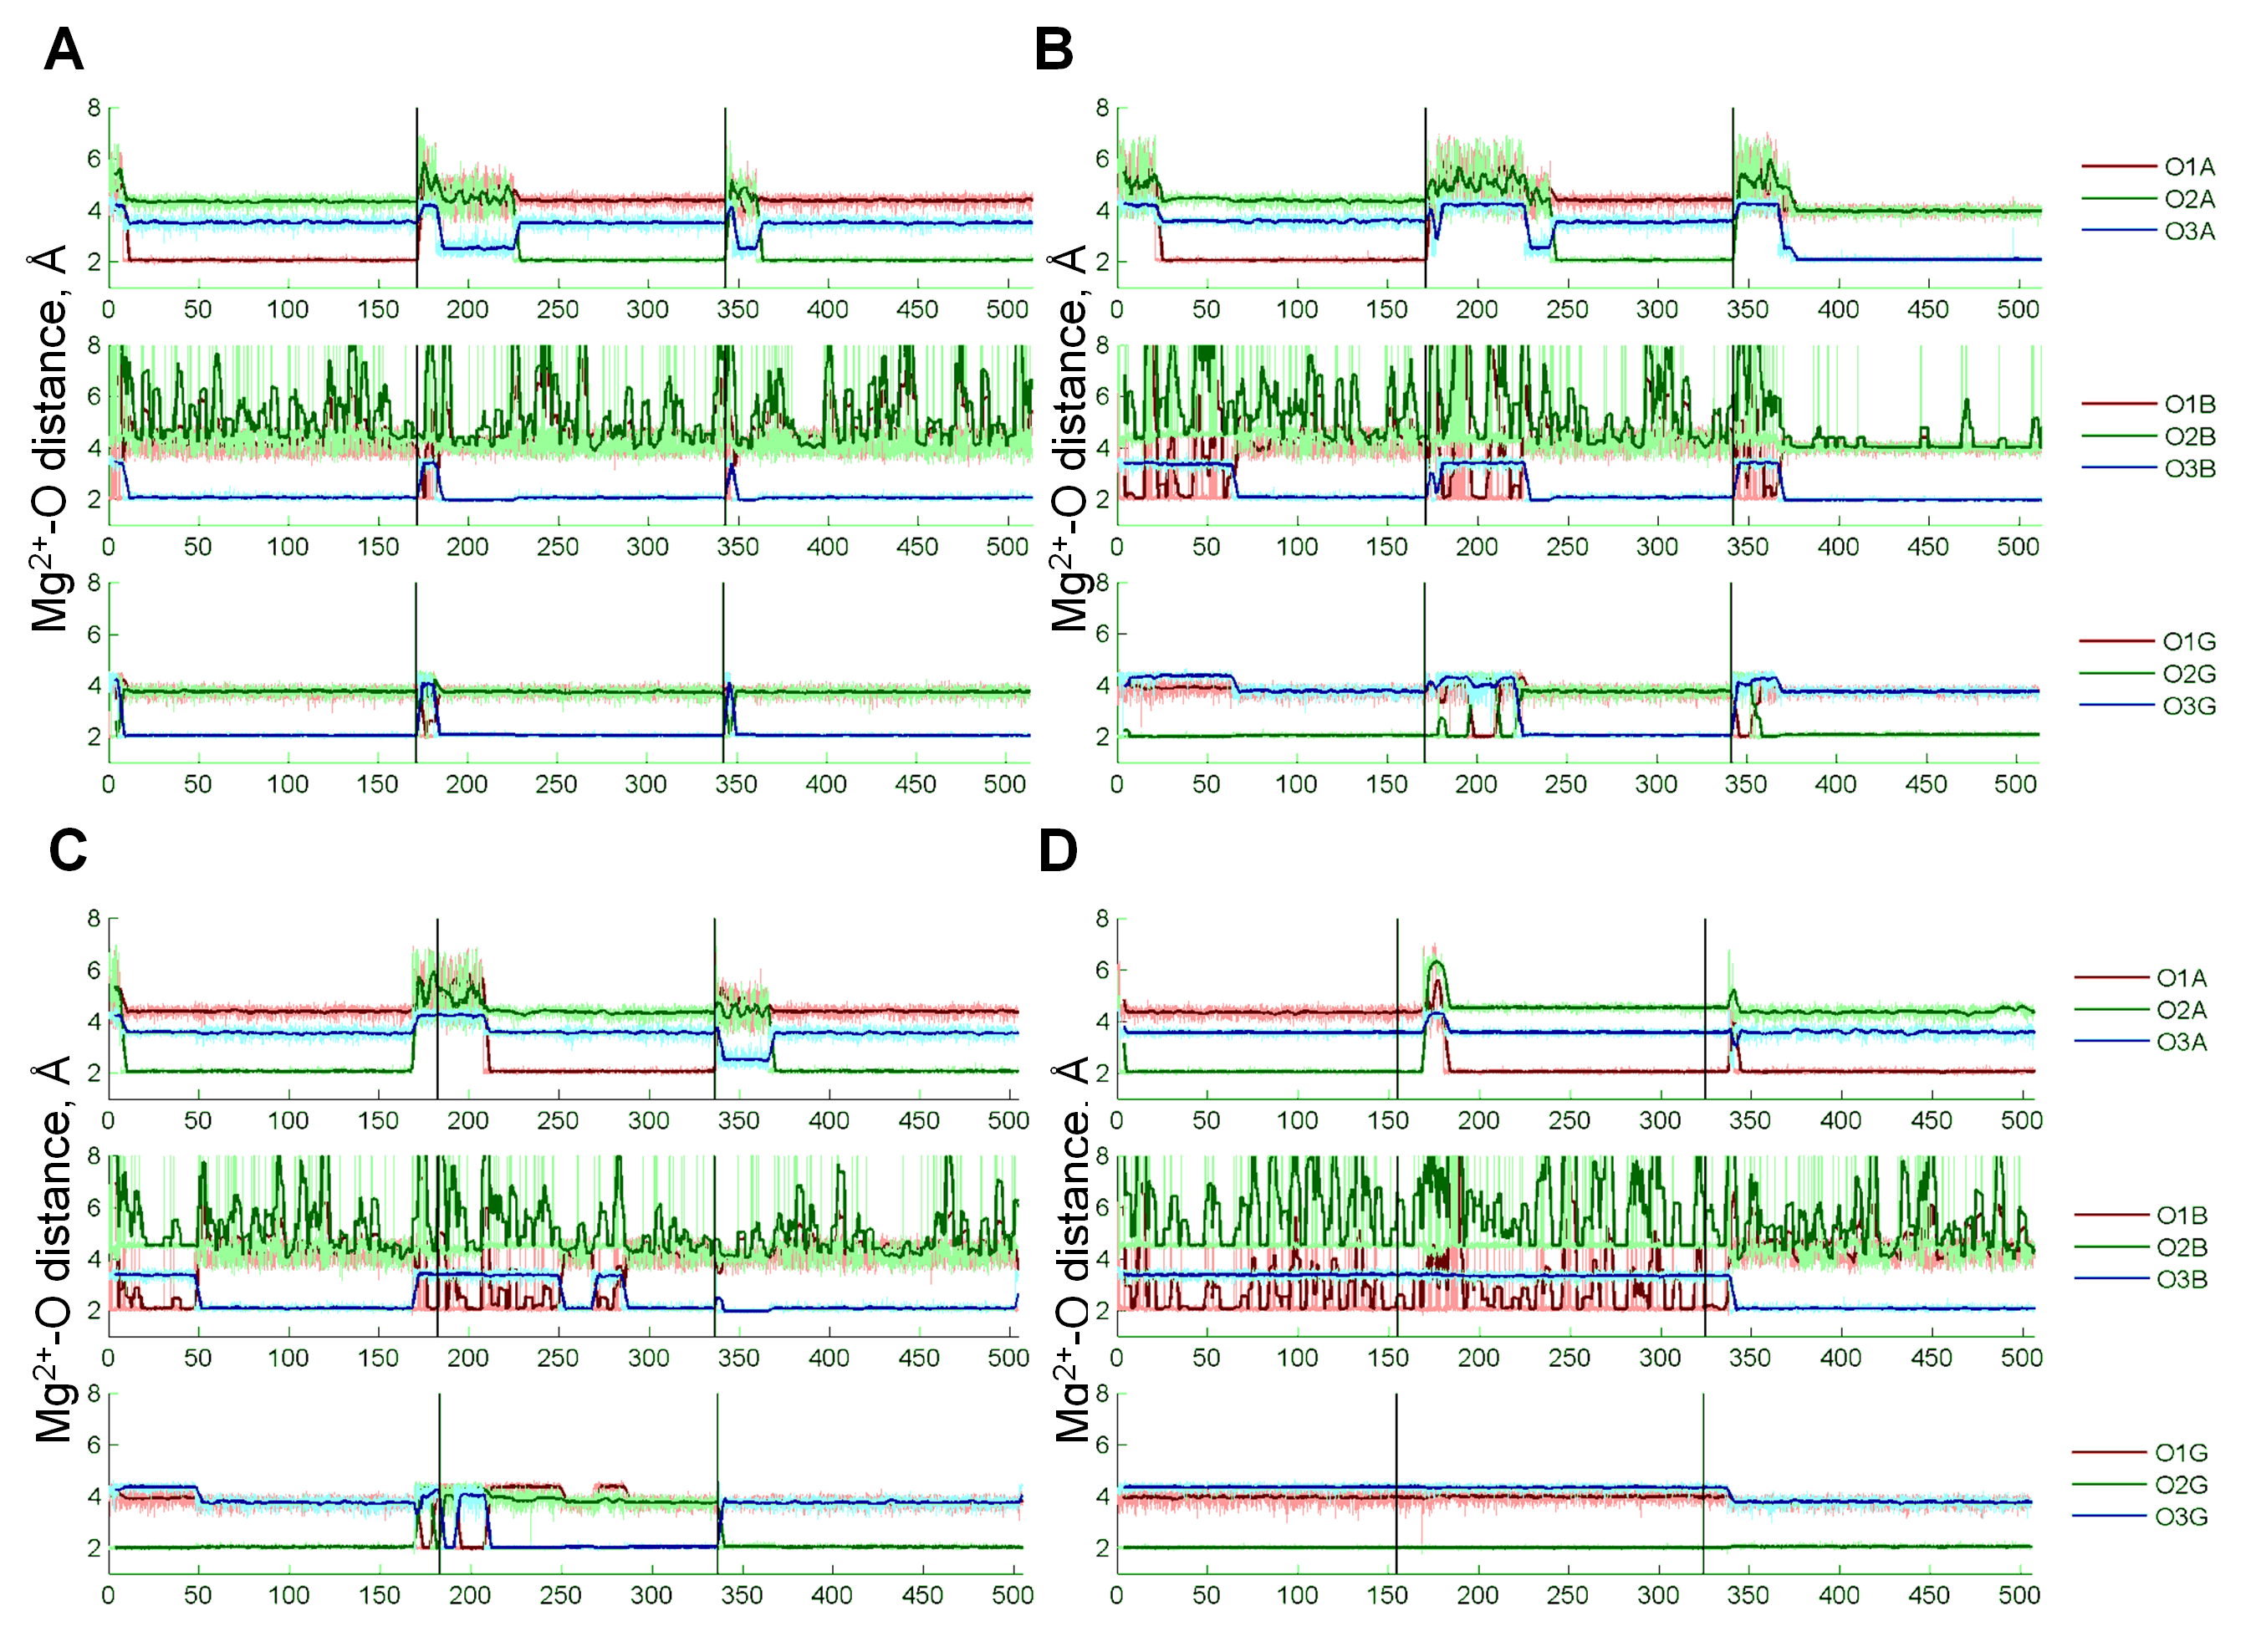

Supplement: supp [file elife-37373-supp-v1.zip › elife_poa_e37373_Figure_4_figure_supplement_1.png]

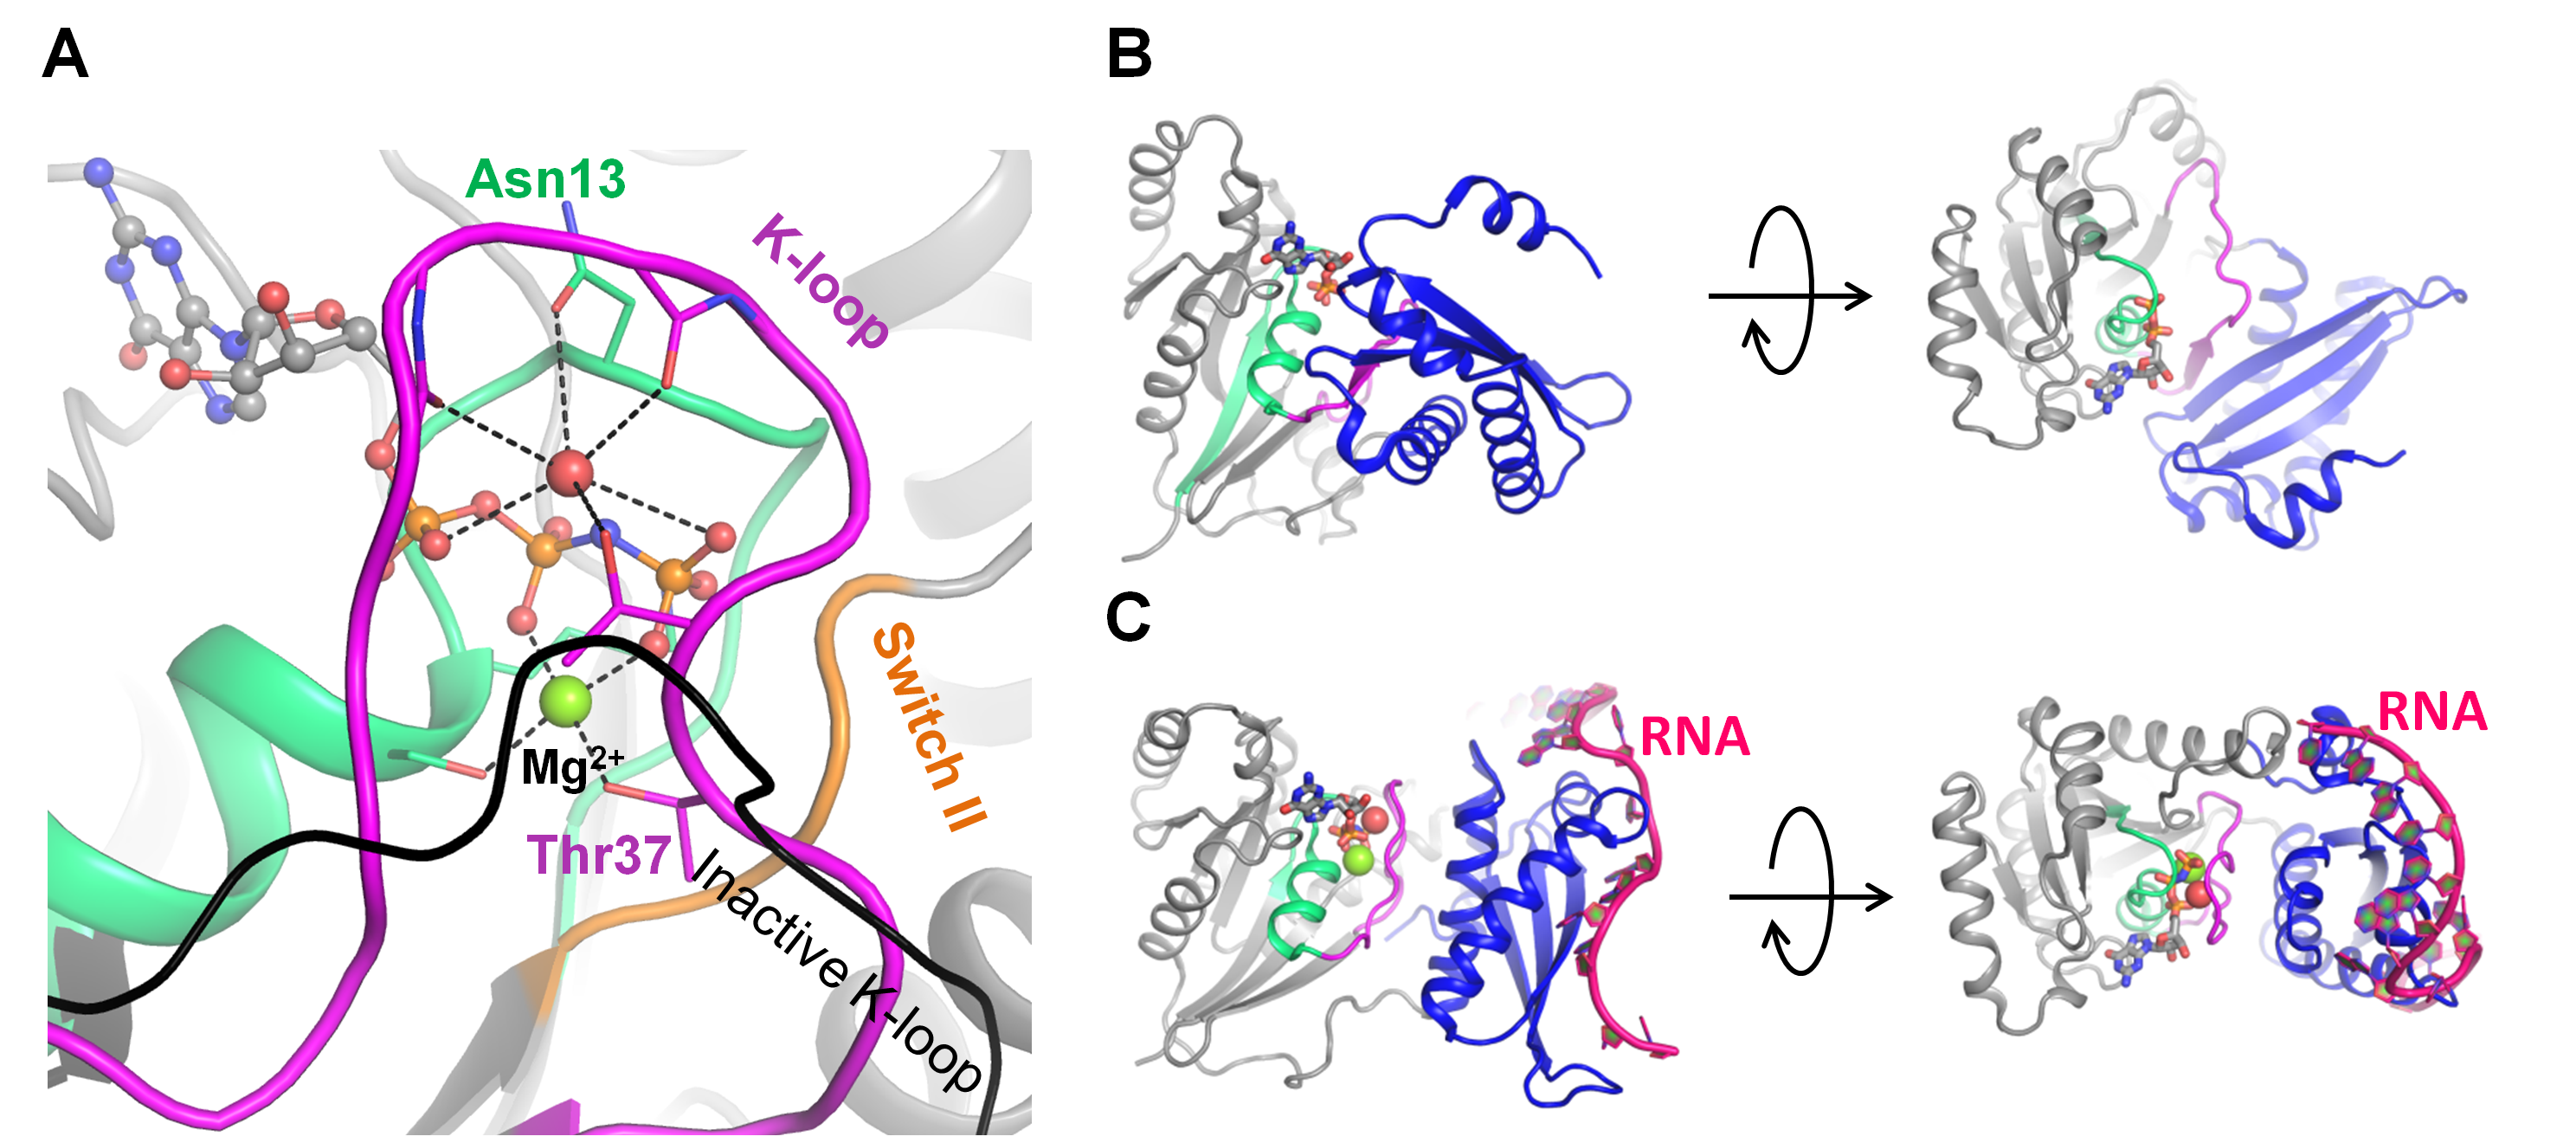

Supplement: supp [file elife-37373-supp-v1.zip › elife_poa_e37373_Figure_6_figure_supplement_3.png]

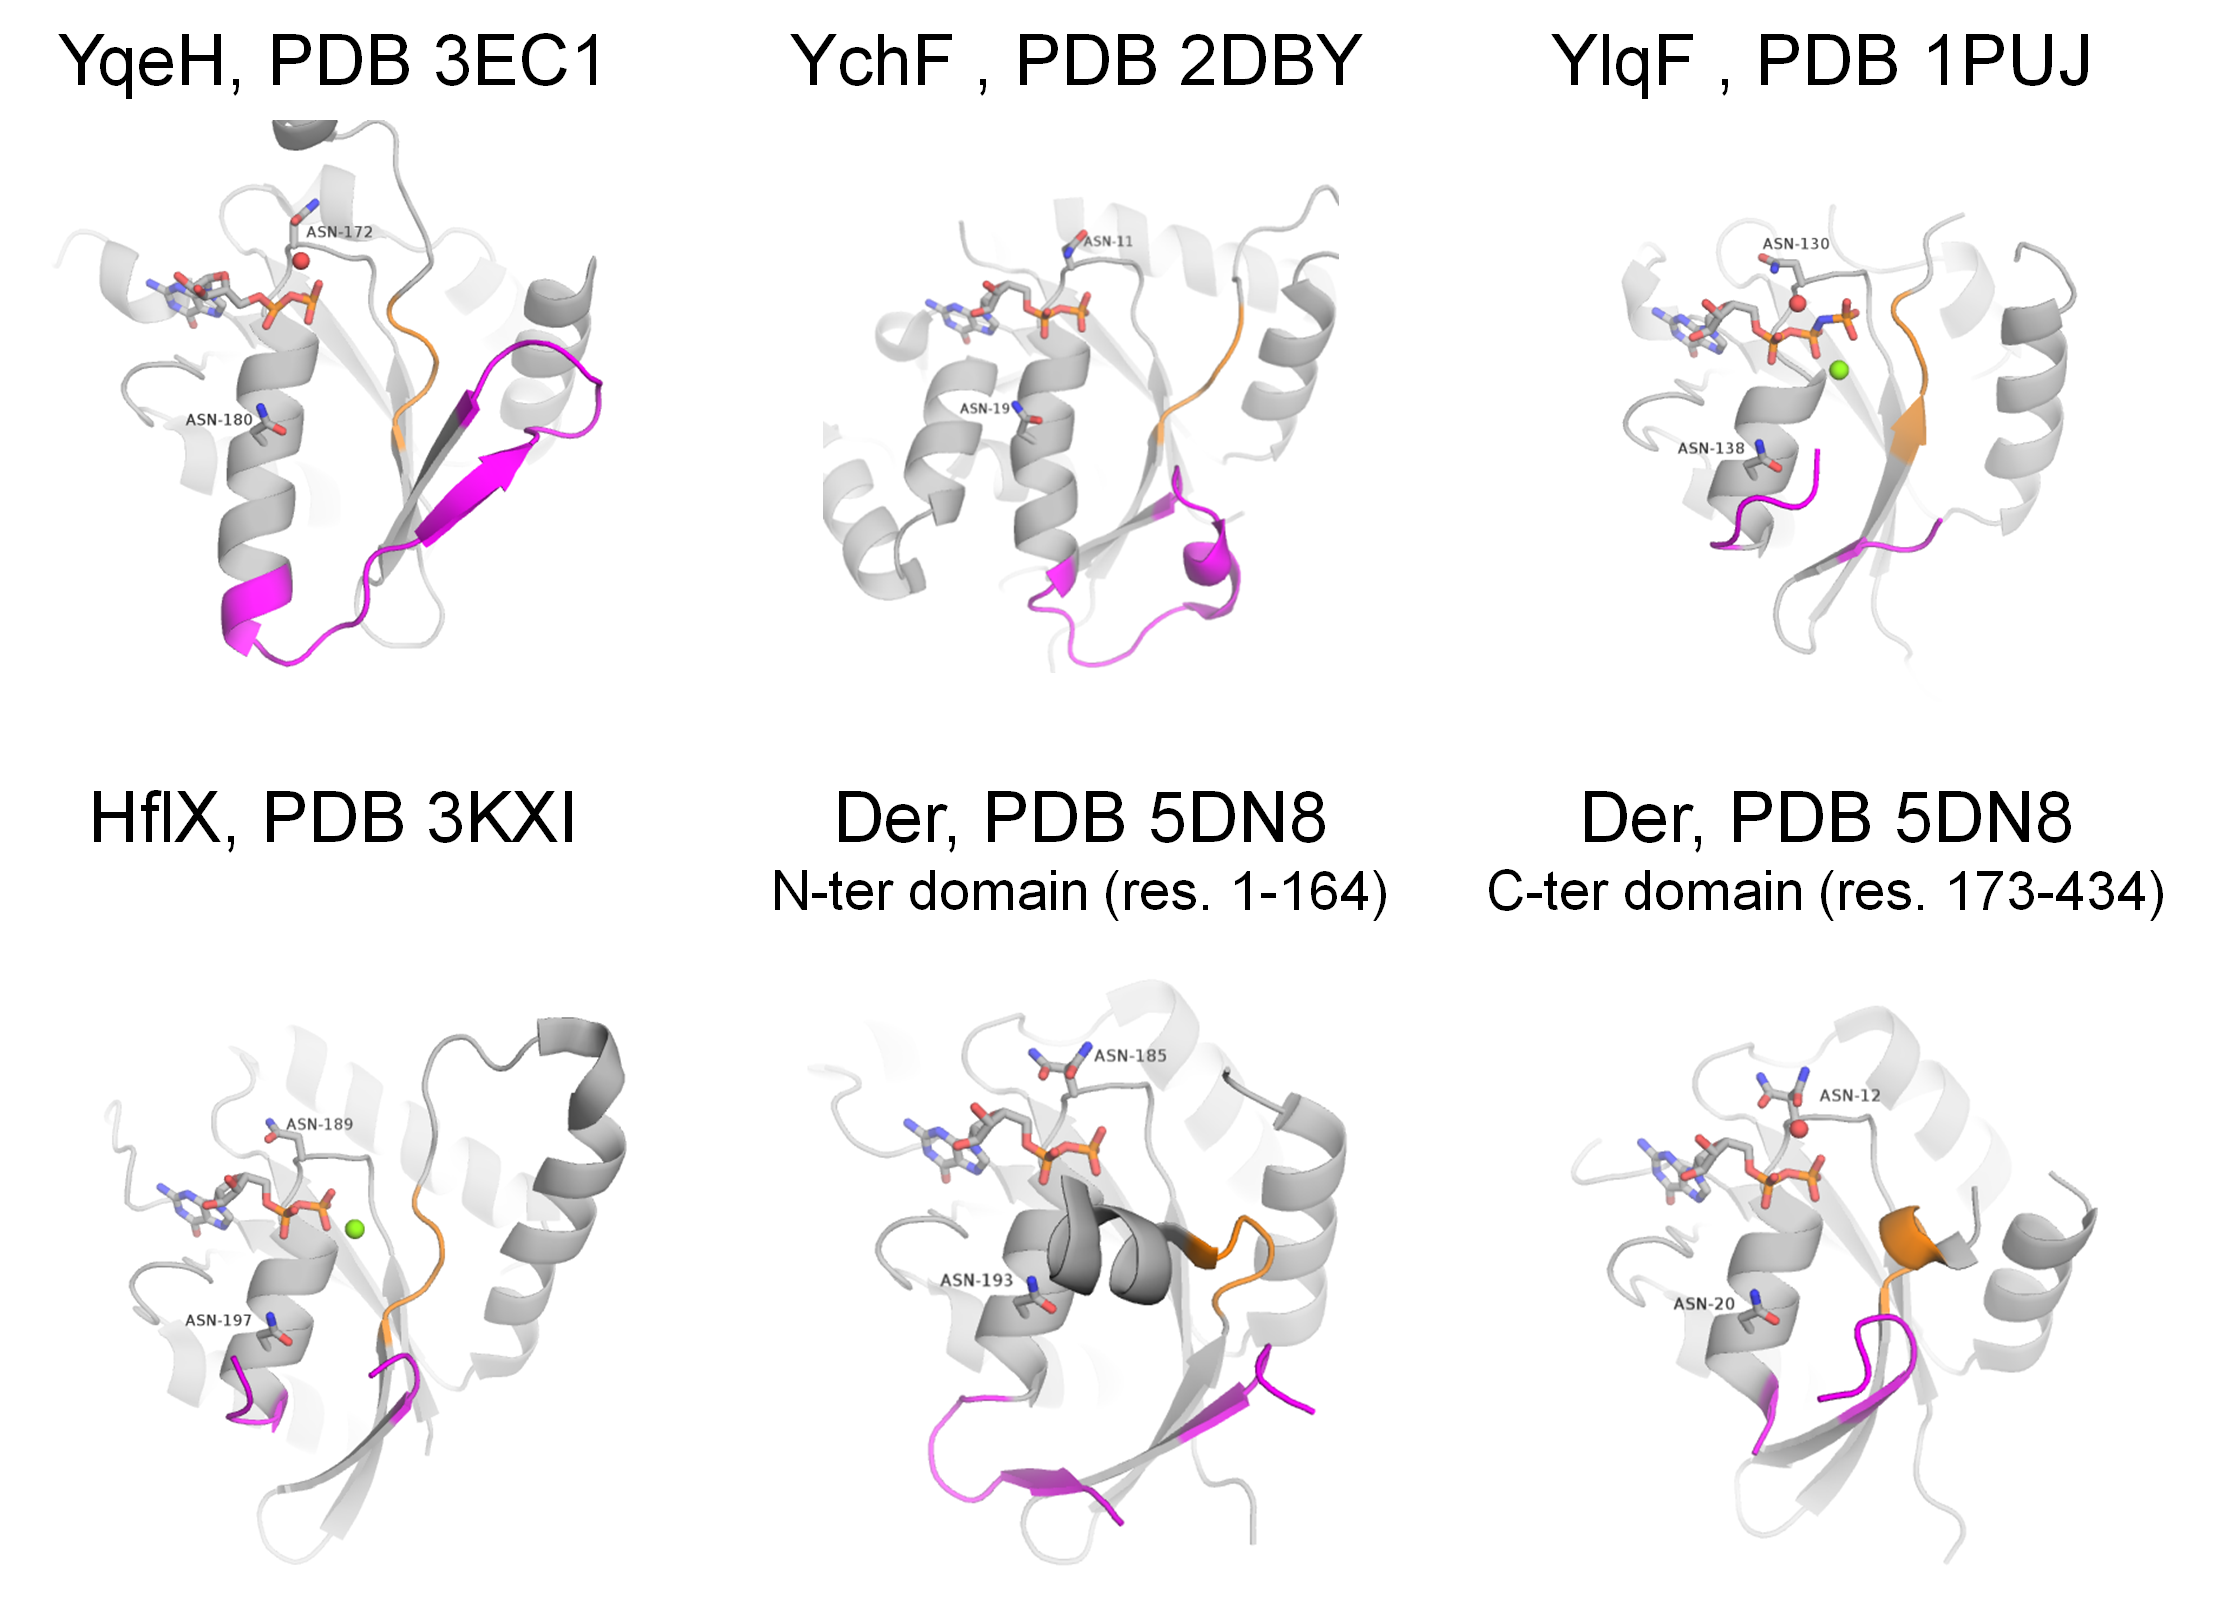

Supplement: supp [file elife-37373-supp-v1.zip › elife_poa_e37373_Figure_6_figure_supplement_1.png]

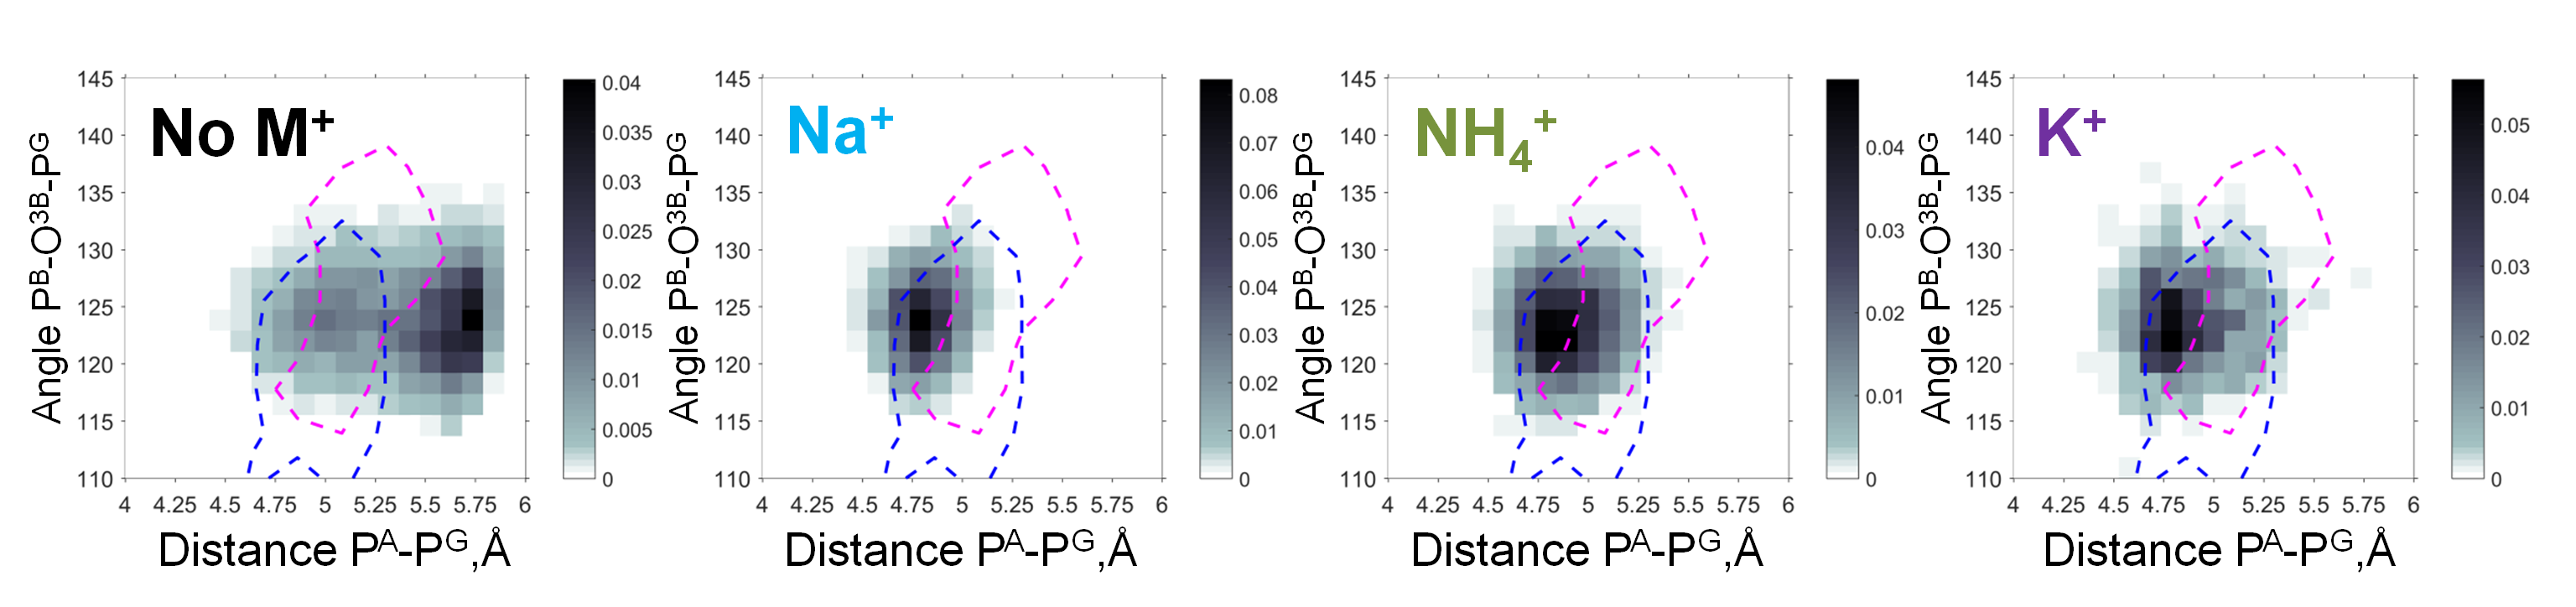

Supplement: supp [file elife-37373-supp-v1.zip › elife_poa_e37373_Figure_5_figure_supplement_1.png]
